# Supplementary material for: Machine learning sequence prioritization for cell type-specific enhancer design
Source: bioRxiv preprint, doi:10.1101/2021.04.15.439984, version 1 (2021-04-15)
Supplement: Supplemental Table 7 [file 439984_file23.xlsx]

## Sheet: res_Satac_CTXunique
Cortex PV neuron-enriched ATAC-seq peaks					Striatum PV neuron-enriched ATAC-seq peaks					GPe PV neuron-enriched ATAC-seq peaks
peakID	log2FoldChange_vs_Striatum	padj_vs_Striatum	log2FoldChange_vs_GPe	padj_vs_GPe	peakID	log2FoldChange_vs_Cortex	padj_vs_Cortex	log2FoldChange_vs_GPe	padj_vs_GPe	peakID	log2FoldChange_vs_Cortex	padj_vs_Cortex	log2FoldChange_vs_Striatum	padj_vs_Striatum
chr1.3119528.3120904	1.79774	0.00201988	2.46398	3.67139e-05	chr1.4934603.4935384	2.32287	0.000366397	1.6738	0.000916888	chr1.5791628.5792309	3.4322	4.83946e-08	2.8266	2.32514e-09
chr1.3292303.3293379	1.9062	0.00240264	1.79353	0.00395735	chr1.5015333.5015988	1.98626	0.000472306	2.52642	1.06197e-09	chr1.6287210.6287929	2.06884	0.000232455	1.40126	0.00113485
chr1.4414142.4415174	2.09346	0.000162348	2.65619	1.36287e-06	chr1.5029379.5030207	3.20371	1.31735e-05	1.96715	0.000440678	chr1.7318890.7319322	4.19114	2.39783e-07	1.45083	0.00586824
chr1.4455947.4456972	1.98388	0.00574736	2.8539	0.000187154	chr1.5728636.5729653	2.44186	0.00195102	2.08904	0.00200335	chr1.9915426.9916246	2.91356	1.08808e-05	2.48817	3.3653e-06
chr1.5130041.5130841	2.15901	0.00440974	2.26937	0.00206544	chr1.5753086.5754104	1.75963	0.00878259	2.34964	7.52385e-05	chr1.11147399.11148730	2.37476	2.92108e-06	2.23146	2.85374e-09
chr1.5346148.5346609	2.53719	0.0074885	3.16351	0.00164632	chr1.5814825.5815786	2.56861	0.000604219	2.83605	1.74754e-05	chr1.12195431.12196347	2.13721	0.000500494	2.2384	4.04426e-06
chr1.6907161.6908088	2.89089	6.34657e-06	3.31254	9.93028e-07	chr1.5866106.5867146	2.53342	4.05371e-05	2.01694	1.33838e-05	chr1.12734940.12735587	2.18959	0.00158983	1.76164	0.00163029
chr1.7731111.7731909	2.06888	0.00433986	2.56406	0.000691296	chr1.6729165.6730264	1.88741	0.00108349	1.40625	0.000586387	chr1.12783768.12784676	1.83622	0.00429305	1.73469	0.000931543
chr1.7750480.7751544	2.24979	0.000502431	2.95999	1.33137e-05	chr1.7315645.7316788	2.58397	0.000192302	1.65448	0.00121022	chr1.12804875.12806014	2.28858	0.000158979	1.62902	0.0010107
chr1.9609270.9609817	1.88019	0.00941762	2.1129	0.00384339	chr1.7758475.7759128	2.62412	6.08808e-05	2.81621	2.77316e-07	chr1.13437460.13438312	1.80863	0.00160365	1.98297	2.05641e-05
chr1.9615773.9616593	2.33603	0.000652385	2.74971	0.000128117	chr1.8685762.8686486	2.11409	0.00368783	1.89764	0.00267359	chr1.13620011.13620582	2.77487	0.000253424	1.52354	0.00930901
chr1.9627192.9627970	2.09492	0.000594346	3.18675	2.55243e-06	chr1.9300670.9301020	1.84707	0.00708994	1.59875	0.0039385	chr1.15456758.15457726	3.16017	3.56839e-09	2.60015	1.71838e-11
chr1.10699819.10700558	1.66408	0.0094044	2.6028	9.43696e-05	chr1.9800673.9801414	2.10278	0.00109876	1.42985	0.00421503	chr1.15637945.15638828	2.30823	0.000132911	2.01878	2.05282e-05
chr1.10777692.10778376	2.6779	0.0004976	2.52611	0.000959601	chr1.14124906.14125475	2.21806	0.00150655	2.46696	3.63138e-05	chr1.15695388.15696464	1.75612	0.00248213	1.99208	4.50528e-06
chr1.11214184.11214788	1.90044	0.00798741	2.2856	0.00152983	chr1.16120356.16121097	2.09419	0.00299719	1.48769	0.00929164	chr1.15712602.15713229	2.5227	0.000453998	1.99871	0.00103774
chr1.11549642.11550357	2.77199	4.85783e-06	2.39202	2.81911e-05	chr1.16250436.16250952	2.86262	0.000163247	1.55353	0.00781756	chr1.16215709.16217052	1.71753	0.000552017	1.79699	1.94019e-07
chr1.13573704.13574870	1.38164	0.00813531	1.86097	0.000312541	chr1.16274435.16275490	2.26945	0.000531364	1.62399	0.000763159	chr1.16346910.16347600	3.16006	9.46411e-09	2.3223	1.48753e-09
chr1.15850593.15851401	2.57739	1.80125e-05	2.41598	3.58957e-05	chr1.17087891.17088398	2.01946	0.00615647	2.14336	0.000872651	chr1.17754949.17755661	2.29875	0.00173437	1.82046	0.00163466
chr1.16258075.16258928	1.73977	0.00135913	2.28918	1.4601e-05	chr1.17416868.17417299	2.71747	0.000245008	2.34492	0.000140424	chr1.18145637.18146221	2.14881	0.0041368	2.63543	5.43257e-05
chr1.16758752.16759742	1.74227	0.00472034	2.27159	0.000218869	chr1.17544623.17545687	1.99643	0.00429016	2.13823	0.000214115	chr1.18911279.18912059	2.61477	2.92394e-05	1.66801	0.000457956
chr1.17043041.17043837	1.72721	0.00575949	2.10489	0.000809199	chr1.21563207.21564055	2.34798	7.07644e-05	1.91705	1.24691e-06	chr1.18955620.18956548	2.97464	2.35756e-05	2.00788	0.000210348
chr1.18147838.18148891	2.57227	3.79135e-05	3.36114	3.54797e-07	chr1.24780976.24781674	2.26421	0.00283687	1.64474	0.00891949	chr1.19040238.19040896	2.42214	0.00691891	1.89434	0.00930823
chr1.20009990.20011166	1.93173	0.000894808	2.50414	4.75064e-06	chr1.24891023.24891890	1.57547	0.00622667	1.63238	2.25386e-05	chr1.19281753.19282425	3.20585	4.69325e-05	2.12886	0.000743777
chr1.20454547.20455184	2.38147	0.000244649	2.49966	9.17927e-05	chr1.25203065.25203706	3.37716	1.7838e-07	1.99624	6.75208e-05	chr1.19326872.19327965	3.34566	3.27036e-08	2.46568	1.11395e-07
chr1.20759724.20760521	2.5336	9.20878e-06	2.26443	5.28551e-05	chr1.26329846.26330554	2.38076	0.0019797	1.94469	0.00294162	chr1.19638881.19639783	3.51203	1.17473e-09	1.88469	1.81126e-06
chr1.20873749.20874605	2.01124	0.00429891	2.7129	0.000192226	chr1.33102387.33103241	2.63734	0.000182569	2.38378	5.66364e-05	chr1.20170559.20171495	3.40339	3.82126e-06	1.65474	0.00140282
chr1.21213944.21214648	1.65193	0.00870186	1.9597	0.00196937	chr1.34701283.34701862	2.44355	0.0045917	2.10116	0.0048385	chr1.20213781.20214879	4.30904	3.52814e-12	2.90073	2.81415e-12
chr1.22245556.22246206	2.81114	0.000185906	2.74012	0.000144754	chr1.34783867.34785313	1.55581	0.00756176	1.12098	0.000481441	chr1.20345997.20346722	2.46209	0.000256398	2.52489	1.10661e-05
chr1.23098076.23099014	1.7933	0.00611173	2.62202	5.75273e-05	chr1.35216159.35216876	2.00281	0.0082651	1.78402	0.00549649	chr1.20494385.20495246	2.06337	0.000906879	1.30706	0.00267932
chr1.23117441.23118028	2.11385	0.00307166	2.82397	0.000200865	chr1.35393598.35394486	2.77572	1.43097e-05	1.89254	8.051e-05	chr1.20974356.20975195	2.5764	7.61604e-05	2.03711	5.70749e-05
chr1.23978034.23978866	2.33621	0.000149177	3.34407	1.73151e-07	chr1.35624693.35625491	1.94351	0.00234858	2.2753	7.35843e-06	chr1.20983926.20984830	1.97989	0.00138039	1.62953	0.000434867
chr1.23985467.23985959	2.09279	0.00872561	3.03113	0.000490632	chr1.39461075.39461641	2.03348	0.00356693	2.01014	0.000434794	chr1.21012554.21013026	2.54762	0.000736562	1.95743	0.000918331
chr1.24122434.24123284	2.8952	1.61784e-05	3.13	8.37038e-06	chr1.39481814.39482391	2.9078	0.00011887	2.21708	0.000272684	chr1.21204637.21205342	3.2694	4.65018e-06	2.64083	1.401e-06
chr1.24229413.24230053	2.03769	0.00109909	3.72185	1.86445e-07	chr1.40180548.40181286	2.16475	0.00467233	2.24207	0.000801678	chr1.21274506.21275267	2.32198	0.00016702	1.59229	0.000380254
chr1.24578437.24579242	2.05321	0.00399599	2.0556	0.00400252	chr1.40313829.40314641	1.54527	0.00752551	2.68849	8.01329e-09	chr1.21304526.21305200	2.3912	1.93335e-05	2.72454	5.14239e-10
chr1.24661428.24661961	2.76883	0.000165301	3.46339	1.49339e-05	chr1.42834139.42834829	2.85552	0.000165961	2.61525	3.95403e-05	chr1.21305366.21305883	2.14343	0.000583462	1.75063	0.000294237
chr1.25891854.25892758	2.41858	0.000552131	2.10308	0.00167709	chr1.44214487.44215266	3.1857	1.41405e-05	1.50631	0.00548574	chr1.21436560.21437405	4.12262	3.91889e-10	2.71574	6.1343e-09
chr1.26498434.26498798	3.04689	0.000683518	3.67698	0.000245298	chr1.44663754.44664746	2.30237	0.000309665	1.40685	0.00290113	chr1.21531447.21532164	2.10677	0.000296219	1.12612	0.00341763
chr1.26646810.26647367	2.0597	0.00711852	2.14343	0.00577754	chr1.50828457.50829406	2.31619	0.00171134	2.18293	0.000394511	chr1.22063049.22063826	2.75486	0.000290365	1.74106	0.00313582
chr1.26773732.26774563	1.86093	0.00741296	2.69243	6.026e-05	chr1.51249132.51249894	1.8419	0.00943917	1.55487	0.00866249	chr1.22315531.22316522	1.71215	0.00243784	2.06925	1.89514e-07
chr1.26913778.26914093	2.35397	0.00489178	2.24961	0.00810197	chr1.51359752.51360556	3.38463	2.51798e-07	2.47548	2.61846e-08	chr1.22612150.22613366	2.43218	9.96308e-06	1.04094	0.00641714
chr1.27478562.27479588	2.61027	1.42337e-05	3.06068	5.89353e-07	chr1.51383664.51384490	3.09743	7.19335e-05	2.22944	0.000382138	chr1.22653516.22654472	2.22968	0.00021176	1.47564	0.00171828
chr1.27607977.27609251	1.79116	0.00153945	1.58639	0.00329868	chr1.51647143.51648364	1.67743	0.00781659	1.83521	0.000121377	chr1.22902871.22903742	2.79834	5.03012e-06	2.16444	7.55692e-08
chr1.27700538.27701209	2.25828	0.00488948	3.16393	0.000144118	chr1.52196807.52197860	2.0673	0.00212752	1.40095	0.00862741	chr1.23689088.23690113	3.04179	1.92933e-06	2.21251	2.25802e-06
chr1.28970725.28971520	2.17981	0.000228061	3.83468	8.44363e-11	chr1.52971919.52972577	1.83832	0.00397455	2.08502	4.8405e-05	chr1.24010897.24011330	2.71719	0.000291537	1.94144	0.00119821
chr1.29019110.29020074	1.8884	0.00498368	1.95151	0.00417601	chr1.54002306.54003106	1.88013	0.00390897	1.52814	0.0028285	chr1.24043998.24044824	2.56135	0.000428943	1.96085	0.00129708
chr1.29322342.29323063	2.88096	9.92682e-05	2.41661	0.0017553	chr1.56021631.56022511	2.21021	0.00189719	1.85593	0.000701771	chr1.24299795.24300561	2.90137	4.02549e-07	2.26173	9.66278e-08
chr1.30416052.30417057	2.12186	0.000385107	3.26126	2.32303e-07	chr1.57217429.57218365	3.27513	5.03704e-07	2.93422	1.62245e-08	chr1.24562835.24563611	3.34445	1.80361e-07	1.75275	7.12822e-05
chr1.30590558.30591240	1.91263	0.00389448	1.85308	0.00483131	chr1.57512392.57513312	2.00433	0.00176364	1.7655	3.19526e-05	chr1.24570210.24570872	2.69096	9.84958e-06	2.33399	2.5992e-06
chr1.30593903.30594380	2.25324	0.000701881	2.0532	0.00170419	chr1.57826147.57826727	2.20376	0.000244627	1.65804	0.000184236	chr1.25087847.25088701	1.84597	0.00173969	1.16028	0.00984753
chr1.30636117.30636473	1.90249	0.00510452	3.12805	2.46162e-05	chr1.58921328.58922097	1.88345	0.00220499	1.91325	4.51555e-05	chr1.25191957.25193232	2.91881	2.00688e-07	1.29588	0.000355447
chr1.30685047.30685719	2.31461	0.00347109	2.13941	0.00758887	chr1.61040358.61041131	2.00239	0.000321289	2.33044	8.52218e-09	chr1.25235256.25235692	2.89021	0.00168097	2.83672	0.000275647
chr1.32294534.32295523	2.37408	4.35301e-05	2.20774	0.000115537	chr1.61160505.61161271	2.36458	0.000515787	1.64478	0.00291565	chr1.25311593.25312732	2.10717	0.00169359	1.58882	0.00302235
chr1.32462902.32463844	1.84989	0.00516835	1.97358	0.00292525	chr1.62488613.62489784	1.94092	0.000491792	1.21145	0.00108113	chr1.25343497.25344665	1.62715	0.00677631	1.44207	0.00210303
chr1.32503245.32504068	2.16443	0.000547231	2.52746	6.81799e-05	chr1.62603744.62604527	2.60616	0.000528691	1.78029	0.00359998	chr1.25414915.25415858	1.65365	0.00881064	1.39357	0.00855912
chr1.32635329.32635797	1.89015	0.00420684	2.46939	0.000232882	chr1.62692340.62692882	2.78292	0.000122544	1.94698	0.000539879	chr1.25766799.25767357	2.22128	0.000603011	1.83835	0.000778509
chr1.32988208.32988998	2.29207	0.000752244	1.94929	0.00215465	chr1.62859213.62860200	2.00214	0.00364151	1.8777	0.00102298	chr1.26217889.26218499	2.18887	0.00272355	1.62473	0.00971109
chr1.33126504.33127256	2.72573	4.42724e-05	2.07501	0.0011127	chr1.63454646.63455098	2.6616	0.000168061	1.97412	0.000353116	chr1.29444999.29445824	3.3989	2.62301e-06	2.62789	1.58724e-06
chr1.33194837.33195574	2.29121	0.000457613	2.08486	0.000436053	chr1.64492197.64493006	1.93971	0.00296852	2.7396	6.74259e-09	chr1.30409935.30410485	2.64179	0.00032213	1.92692	0.00096796
chr1.33817972.33818275	2.87772	0.000309665	2.66509	0.000956055	chr1.64620094.64620642	2.03222	0.00171247	2.74888	2.15395e-06	chr1.30624951.30625782	2.36793	0.000140982	1.96077	2.93071e-05
chr1.34366668.34367370	2.69148	0.00369883	2.58835	0.00371205	chr1.64715496.64715817	2.31922	0.00311603	2.41626	0.000361485	chr1.30639635.30640468	2.88806	4.38124e-05	1.78921	0.00134517
chr1.34779320.34779989	1.85914	0.00934182	2.97299	0.00012516	chr1.64893719.64894723	1.91503	0.00213222	1.53389	0.00153162	chr1.32087538.32088647	2.50162	0.000107234	2.12376	4.88751e-05
chr1.35162336.35163194	2.10537	0.00733144	2.09343	0.00465518	chr1.66913617.66914658	3.04554	3.27964e-06	2.35794	4.16886e-06	chr1.32316385.32317617	3.8297	1.21978e-11	2.46784	0.000725768
chr1.35361382.35362082	2.1521	0.00218774	2.64025	0.00025743	chr1.67223520.67224226	2.07443	0.000416101	2.01515	1.65404e-06	chr1.32434268.32435481	2.18894	5.1454e-05	1.56339	8.29789e-05
chr1.35535298.35536761	2.27805	9.08665e-05	2.68849	4.15207e-06	chr1.67968774.67969768	3.20329	1.24898e-05	1.61761	0.0032903	chr1.32568341.32569292	1.69454	0.00373691	2.37822	3.88398e-07
chr1.35551331.35552032	2.72368	0.000191983	1.98415	0.00452646	chr1.68451717.68452448	2.14359	0.00163292	1.69798	0.0015533	chr1.32865961.32866523	2.08479	0.00176687	2.29613	3.65933e-05
chr1.36201525.36202184	1.97689	0.00241652	2.92649	2.91179e-05	chr1.68828265.68829376	2.14964	0.0020647	2.02254	0.000725203	chr1.32871722.32873394	1.75068	0.000692057	1.1515	0.000785622
chr1.36707218.36707557	2.69327	0.000832501	2.23371	0.0057992	chr1.69046609.69047176	2.59043	0.000117935	2.32273	4.81591e-06	chr1.33350259.33351232	2.64082	2.25338e-05	2.17299	6.87249e-06
chr1.38240145.38241415	1.76874	0.0021232	2.45789	2.37117e-05	chr1.70951935.70952665	3.1123	8.69796e-06	3.03944	5.07981e-08	chr1.33479954.33481458	3.77256	1.10353e-14	1.43509	9.30552e-08
chr1.38729837.38730932	1.56268	0.0061309	1.89678	0.00198158	chr1.71099750.71100344	1.64047	0.00480453	1.44216	0.000148452	chr1.33502758.33503813	2.23037	0.000128968	2.02432	8.10258e-06
chr1.38806960.38807637	2.02052	0.00606397	1.9682	0.00881638	chr1.71389946.71391103	2.35719	0.000652269	1.69767	0.00101941	chr1.33608013.33608486	2.25398	0.00175562	2.06469	0.00105853
chr1.39097269.39097979	1.99137	0.00477084	2.65745	6.65621e-05	chr1.71540285.71541118	3.39709	9.78944e-06	1.8715	0.00116253	chr1.34137226.34137966	1.78145	0.0075574	1.57492	0.00307124
chr1.39103162.39103874	1.76688	0.00498335	3.24577	2.32424e-06	chr1.71853851.71854654	2.8385	0.000127908	2.13333	0.000363783	chr1.35323043.35323896	3.86806	8.52835e-08	2.60389	6.92619e-07
chr1.39293978.39294769	2.28886	0.000513664	2.95025	1.41891e-05	chr1.72539682.72540227	2.20925	0.000592023	1.97307	0.000101543	chr1.35706849.35707865	2.78169	4.80213e-06	2.34822	8.44589e-07
chr1.39656851.39657669	1.92964	0.00751729	2.2848	0.000878725	chr1.73076820.73077576	2.52477	0.000370876	1.82126	0.00148021	chr1.35713629.35714815	1.72291	0.00484388	1.96574	6.51113e-05
chr1.39676148.39676814	2.31953	0.00089567	3.10222	3.69207e-05	chr1.74672339.74673203	1.80326	0.00595063	1.35585	0.00864412	chr1.35857012.35857708	3.86884	1.06032e-09	3.32407	1.23367e-11
chr1.40235396.40236662	1.7185	0.00579213	2.1361	0.00022241	chr1.76052974.76054247	3.31774	1.35759e-07	1.34478	0.00131552	chr1.35913638.35914479	1.79101	0.00753313	2.23599	7.52722e-05
chr1.40628113.40628951	2.60615	0.000227782	2.25033	0.00118158	chr1.76212351.76213352	2.20312	6.16029e-05	3.04387	3.31827e-13	chr1.36139457.36139715	2.19485	0.00682357	2.19155	0.00151224
chr1.41899863.41901063	2.41111	0.000133137	2.25828	0.000358293	chr1.76644606.76645210	2.2349	0.00887523	2.01326	0.00669787	chr1.36417352.36418525	2.23277	0.00138933	1.82818	0.000769301
chr1.42012399.42013507	2.02152	0.00175646	1.96282	0.00241182	chr1.79374486.79375343	3.37008	7.44101e-09	1.69269	6.22851e-07	chr1.38298069.38299091	1.83875	0.000370277	1.45318	4.16123e-05
chr1.42253559.42254198	2.89085	2.07194e-05	3.01731	2.01348e-05	chr1.80015218.80016127	2.4489	0.000400866	1.84662	0.00085083	chr1.38380832.38382036	2.57185	0.000123349	1.87103	0.000202194
chr1.42485631.42486276	2.5687	0.000108959	2.99021	9.58881e-06	chr1.80132851.80133384	2.73745	0.000676736	2.6515	0.000166244	chr1.38725389.38726209	2.34585	0.00189366	1.7942	0.0038041
chr1.42621765.42622326	2.4917	0.00181117	2.74685	0.00140424	chr1.81280978.81281527	2.01689	0.0010521	1.56398	0.000822792	chr1.38933572.38934017	3.11443	0.000915804	2.15239	0.00446556
chr1.42989569.42990362	2.65476	0.000211568	1.92208	0.00495066	chr1.82460859.82461825	2.40894	0.000142006	2.10211	2.50766e-05	chr1.39361623.39362453	2.15144	0.000402325	1.24617	0.00455351
chr1.43178309.43179535	2.25798	7.57869e-05	2.51454	5.1671e-06	chr1.84072812.84073830	1.96648	0.00517468	1.48816	0.00889319	chr1.39499469.39500143	1.91133	0.00678488	2.23748	0.000148575
chr1.43489175.43490160	1.9118	0.00188711	2.12607	0.000599991	chr1.86933339.86934006	2.12046	0.0061087	2.28843	0.000868371	chr1.39820674.39821001	2.15812	0.00214599	2.40918	6.37184e-05
chr1.43597404.43598230	2.16468	0.00501034	2.09824	0.0070459	chr1.87722074.87722694	2.04352	0.00215276	2.44946	6.16284e-06	chr1.40007666.40008536	2.17784	0.000214652	1.63587	0.000166176
chr1.43877076.43877794	2.7702	2.44299e-05	3.34723	1.16873e-06	chr1.90764149.90764806	3.06279	1.34874e-05	1.56397	0.00267593	chr1.40183237.40183979	2.21699	0.000921918	1.80147	0.000763455
chr1.44057074.44058148	1.97595	0.00318871	1.75118	0.00781331	chr1.91187880.91188454	2.6985	0.000126166	1.892	0.000151474	chr1.40438222.40439044	2.58624	0.000340438	2.08905	0.000359414
chr1.44124863.44125560	2.47629	0.000456924	2.06104	0.00563854	chr1.93349430.93350246	1.87168	0.000574449	2.599	2.17565e-12	chr1.40694309.40695064	2.50685	6.36786e-05	2.91359	1.32495e-09
chr1.44142529.44143100	2.45052	0.000818046	2.52292	0.000853088	chr1.93365849.93366717	2.4005	0.000203634	2.52612	2.96712e-06	chr1.41240204.41240961	2.18272	0.000390677	1.74955	0.000314676
chr1.44218838.44219630	1.79166	0.00627324	2.00962	0.00210152	chr1.95024569.95025260	3.52326	1.21162e-06	2.44788	1.77288e-05	chr1.41349874.41350767	2.73428	6.09696e-05	1.56883	0.002517
chr1.44943633.44944310	2.2684	0.00416723	2.8288	0.000625841	chr1.95318257.95318618	2.75463	0.000221212	1.79446	0.00208389	chr1.41430970.41431866	2.87908	5.55257e-08	1.44397	1.65826e-05
chr1.45472556.45473687	2.1574	0.001691	2.22388	0.000695185	chr1.95466769.95467752	2.76521	4.64844e-06	1.76612	2.44159e-05	chr1.41560809.41561646	3.28005	1.33725e-07	3.37805	1.72494e-11
chr1.45646836.45647838	2.09588	0.00118081	3.07357	4.3793e-06	chr1.97843219.97844030	2.08389	0.00211725	2.25974	0.00014622	chr1.41933740.41934384	3.00764	1.10101e-06	2.62863	3.56549e-07
chr1.45845333.45846222	1.96755	0.00161005	3.09405	3.40002e-06	chr1.97985668.97986427	1.84671	0.00539068	1.31869	0.00678927	chr1.41999035.41999896	3.01491	7.65897e-07	2.0027	3.08759e-06
chr1.46937610.46938188	2.75171	8.33575e-06	2.75883	2.23757e-05	chr1.98667718.98668818	2.76976	7.24448e-06	2.53242	5.47072e-08	chr1.42065900.42066748	1.8663	0.00609617	1.77014	0.00205414
chr1.46963890.46965148	1.44077	0.00583334	1.28716	0.00854182	chr1.98831573.98832912	2.48836	2.60618e-05	1.16331	0.00377424	chr1.42099130.42099924	1.96279	0.000916734	1.67927	0.0002394
chr1.47003354.47004669	2.2684	4.80115e-05	2.55458	5.22062e-06	chr1.98858264.98859319	2.6808	9.41919e-06	2.35581	1.50651e-07	chr1.42102108.42102616	2.64587	0.000102779	1.8338	0.000561518
chr1.47192730.47193587	2.38449	9.62657e-05	3.09343	9.6171e-07	chr1.99369328.99370285	2.54415	0.00014064	2.47532	1.16108e-05	chr1.42145284.42146714	2.0265	0.000921484	1.28705	0.00468872
chr1.47485822.47486527	1.85691	0.00966516	2.389	0.00115949	chr1.100366703.100367348	2.30209	0.000822386	1.55418	0.00411759	chr1.42149887.42150943	2.58318	5.98036e-05	2.40453	9.94749e-06
chr1.48912566.48913047	2.86961	0.000192232	3.40472	4.39606e-05	chr1.101500242.101501253	1.84785	0.00173427	1.93387	1.47926e-05	chr1.42255653.42256481	3.46362	5.00801e-10	1.83901	3.84756e-07
chr1.49110532.49111089	2.20686	0.00398835	2.34285	0.00274442	chr1.101809715.101810956	1.81355	0.00463591	1.35819	0.00574363	chr1.42816330.42817080	3.02075	1.01687e-07	2.24053	0.00277968
chr1.49942088.49942551	2.45941	0.00473399	3.44462	0.000506887	chr1.104876737.104877764	2.50648	1.5081e-05	1.64661	9.09087e-06	chr1.42870179.42870967	2.37368	6.24403e-05	1.70582	0.000150766
chr1.50573728.50574452	2.50101	0.000121646	2.36056	0.000294566	chr1.105263379.105264103	2.01881	0.00372659	1.12124	0.00790036	chr1.42888309.42890117	2.85372	3.89208e-09	1.43473	5.75504e-07
chr1.51242776.51244035	1.67279	0.00812803	1.99843	0.000900658	chr1.106132005.106132993	1.61804	0.00795692	2.76483	1.25285e-12	chr1.42897496.42898094	3.23148	1.11173e-05	2.01557	5.96822e-05
chr1.52140301.52141054	2.00056	0.00822039	2.03017	0.0017571	chr1.106907539.106908385	2.2818	0.0021669	1.88273	0.00242425	chr1.42977879.42979340	2.24312	2.27577e-05	1.1101	0.00224138
chr1.52149834.52150527	2.13234	0.000543178	1.88822	0.00447308	chr1.109812458.109813362	2.32774	0.00456579	1.96462	0.00460378	chr1.43347081.43347764	2.61449	8.55965e-06	1.28966	0.0040302
chr1.52280077.52280776	2.05709	0.00123331	1.87146	0.00249289	chr1.109957428.109958351	2.83835	0.000165961	2.02091	0.00131616	chr1.43439110.43439954	3.21151	4.0324e-07	2.38682	2.16747e-06
chr1.52464706.52465852	2.118	0.000108764	2.56848	2.36504e-06	chr1.110867550.110868156	2.37812	0.00648377	2.98721	0.000192685	chr1.43844720.43846117	2.61132	1.50614e-05	2.49967	2.51848e-07
chr1.52553626.52555096	1.78253	0.00372802	2.12093	0.000638649	chr1.112520398.112521567	3.14353	1.7838e-07	2.54438	4.85438e-09	chr1.44458741.44459908	1.94514	0.000455093	1.13655	0.00731945
chr1.53014729.53015207	2.73856	4.33111e-05	2.70838	3.32793e-05	chr1.113630835.113631615	2.77981	0.000135539	1.60892	0.00313353	chr1.44561014.44561889	2.61088	0.000207998	1.84016	0.000635721
chr1.54468376.54469164	1.94477	0.00348579	2.25265	0.000751749	chr1.114528214.114529215	2.28446	4.68839e-05	1.42287	0.000111541	chr1.45385988.45386641	1.97421	0.00174464	1.55915	0.00168012
chr1.54716904.54717322	2.7612	0.000534333	2.56465	0.00124118	chr1.115048464.115049267	2.45711	0.000873684	1.80034	0.00264543	chr1.46928833.46929377	3.17107	0.000182471	1.72629	0.00924321
chr1.55158158.55159182	1.78215	0.0016736	2.39803	6.09799e-05	chr1.115792812.115793718	2.13122	0.000759538	1.53668	0.00140325	chr1.47297997.47298863	3.15455	3.3137e-06	2.34288	2.22344e-06
chr1.55899858.55900560	2.76686	2.13374e-05	2.89771	8.04177e-06	chr1.118940916.118941821	2.41501	2.83647e-05	1.71801	2.51769e-05	chr1.47446394.47446911	2.04418	0.00284675	1.98795	0.000246553
chr1.55990675.55991494	2.06521	0.00517943	2.59771	0.000467244	chr1.119878832.119879907	1.81937	0.00189979	1.28548	0.0020059	chr1.47464741.47465669	2.3973	0.000745192	1.92019	0.000972415
chr1.56066087.56067228	1.9969	0.0013068	2.22882	0.000778716	chr1.120094739.120095546	2.66345	0.000113068	1.62857	0.00209201	chr1.47535442.47535756	2.72822	0.00281772	2.09887	0.00519373
chr1.56316629.56317187	2.60508	0.000606853	2.2418	0.00451073	chr1.120217604.120218261	1.98499	0.000977351	2.59237	7.23885e-08	chr1.47910516.47911347	2.87096	5.07635e-06	1.90822	2.54477e-05
chr1.56607555.56608072	2.29128	0.00232443	2.88383	0.000369345	chr1.121468023.121468678	1.93964	0.00108175	1.30881	0.000368758	chr1.48792233.48793209	1.52062	0.00661888	1.90431	1.95911e-07
chr1.56664303.56665407	1.67807	0.00968273	2.10553	0.00105099	chr1.121812039.121813142	2.03861	0.00159858	1.53555	0.002121	chr1.49039605.49040363	3.99006	2.85615e-07	1.44905	0.00328739
chr1.56850166.56851261	2.01773	0.00130993	2.03353	0.00077044	chr1.121820305.121821205	2.59251	0.000185958	1.95015	0.000343194	chr1.50525743.50526314	3.42722	2.64125e-05	2.10067	0.000693292
chr1.56900084.56901242	2.23892	0.000113068	2.15832	0.000173993	chr1.121962958.121963953	2.26842	0.000171905	1.88082	2.86206e-05	chr1.51120361.51120996	2.74634	0.000460074	1.90287	0.00231236
chr1.56914202.56914902	2.43574	0.000245141	3.50067	2.79902e-06	chr1.122075936.122076568	3.38935	1.07357e-05	2.18701	0.000219641	chr1.51382673.51383369	2.97701	7.97231e-06	1.83667	0.000195135
chr1.56920391.56920958	1.91404	0.00788312	2.42688	0.00099728	chr1.122082059.122083061	3.05297	1.58164e-07	1.1948	0.00128985	chr1.51493018.51493766	2.74632	0.000343264	2.0499	0.000959492
chr1.57878544.57879534	1.99347	0.000251087	2.16271	2.37677e-05	chr1.122634538.122635182	2.9477	2.01837e-05	2.07397	0.00016358	chr1.51761786.51762621	3.074	1.34739e-06	2.22952	2.78568e-06
chr1.58291895.58292531	2.37372	0.000132085	2.78642	1.00726e-05	chr1.123621290.123622389	2.03491	0.0016493	1.60034	0.00150491	chr1.52056444.52057014	4.31501	2.30282e-07	3.37334	9.60693e-08
chr1.58359093.58360028	1.78597	0.00164363	3.12997	7.05443e-08	chr1.124389157.124390179	2.45913	2.75567e-05	1.87362	5.16904e-06	chr1.52250727.52251590	2.57632	3.50296e-05	1.78333	0.000152359
chr1.58494579.58495384	2.33781	0.00463357	2.68226	0.00258036	chr1.126137950.126138784	2.0947	0.00270204	1.58906	0.00422786	chr1.52455353.52455750	2.33421	0.00911419	2.47332	0.000791827
chr1.58599060.58599747	2.41216	0.000692811	2.14724	0.00394665	chr1.126341772.126342273	2.45413	7.06462e-05	1.95698	2.69582e-05	chr1.52703688.52704851	1.78777	0.00329394	1.25237	0.00489734
chr1.58739246.58740010	1.83208	0.00276892	2.71617	1.69909e-05	chr1.126378693.126379435	2.13045	0.00477454	1.78648	0.00499769	chr1.52876350.52877638	3.2673	2.09279e-09	1.45009	4.90456e-05
chr1.58830658.58831372	2.16231	0.00319262	3.44632	1.24949e-05	chr1.127338975.127339860	2.06804	0.000753125	1.3006	0.00568933	chr1.53892488.53892955	2.70137	0.000465009	2.12921	0.000473852
chr1.58856790.58857406	2.3736	0.0031141	3.21643	0.000322701	chr1.128015884.128016465	4.15556	1.84985e-09	2.31822	4.25142e-07	chr1.54514715.54515636	2.75353	0.000111215	1.68983	0.00184497
chr1.59826361.59827075	2.01435	0.000917283	2.06586	0.000778976	chr1.128669089.128669909	1.74575	0.00342464	1.74153	6.6373e-05	chr1.54732793.54733720	2.68015	7.55361e-05	1.95499	0.000217653
chr1.60035071.60035595	2.28975	0.00619693	2.19818	0.00852991	chr1.128758417.128759413	2.41502	0.000344177	2.06279	0.000125253	chr1.54787826.54788740	3.07559	1.40169e-06	2.52511	1.65898e-07
chr1.60795374.60796192	2.68538	1.39013e-05	2.13681	0.000303943	chr1.129533908.129534659	3.15843	4.85783e-06	2.87269	2.08704e-07	chr1.54814908.54816029	2.90956	1.86445e-07	1.73994	8.31535e-07
chr1.62595198.62595903	2.3519	0.000528209	2.0945	0.00240089	chr1.129589007.129589952	1.76075	0.00322437	1.6901	9.12513e-05	chr1.55449004.55449592	2.24648	3.99098e-05	1.65466	2.08562e-05
chr1.62687271.62688447	1.70586	0.00520701	2.42205	7.43204e-05	chr1.130041280.130042272	2.70746	1.2992e-06	2.57247	3.69743e-11	chr1.55462275.55463046	1.87719	0.00164242	1.71816	0.00024099
chr1.63871521.63872467	2.471	0.000148487	3.2245	5.25163e-06	chr1.130571177.130571964	2.53267	0.000450961	2.33643	9.0294e-05	chr1.56256197.56256803	3.01363	8.52814e-05	1.9769	0.000686169
chr1.63964177.63965178	2.37027	0.000884412	2.6465	0.000237519	chr1.131659430.131660084	1.94672	0.00247324	2.64546	4.01814e-10	chr1.56554678.56555465	2.21113	0.00208763	1.84737	0.00164146
chr1.64364070.64364548	2.08838	0.00265914	1.90002	0.00709184	chr1.132561774.132562431	2.49489	0.000154985	2.14957	3.27041e-05	chr1.57333647.57334321	2.46318	0.000242668	1.417	0.00671887
chr1.64513864.64514759	2.38155	0.000258149	2.51095	7.64321e-05	chr1.132944554.132945103	1.91273	0.00665542	1.65155	0.00441625	chr1.57468670.57469132	2.7282	0.00171788	2.51741	0.000444964
chr1.64633084.64634136	1.83382	0.00106186	2.82744	1.08222e-06	chr1.135333522.135334149	2.38982	0.000818893	1.9026	0.00121827	chr1.57484898.57485745	2.94652	1.13218e-05	1.94169	0.000311869
chr1.65635278.65635986	2.71019	0.000284051	3.21322	2.64002e-05	chr1.135840422.135841352	1.7295	0.00506589	1.77741	0.000186995	chr1.57595204.57596367	2.48969	7.94e-06	1.63228	5.92135e-06
chr1.65966096.65967189	2.32853	0.000726419	1.95264	0.00352953	chr1.136605249.136606133	1.94193	0.00726339	1.56309	0.00966031	chr1.57607701.57608621	2.38246	0.000244236	1.82279	0.000273902
chr1.65981448.65982189	2.18808	0.000730252	3.23586	4.38282e-06	chr1.136617046.136617780	2.32454	0.000368033	1.79636	0.000487106	chr1.57622776.57624119	2.14174	0.00014661	1.36423	0.000872326
chr1.66196351.66197324	1.50813	0.00563121	1.99753	0.000133055	chr1.137435165.137436012	3.22728	1.76042e-06	2.25999	3.5311e-06	chr1.57641918.57644097	2.07623	2.62301e-06	1.64621	1.66178e-10
chr1.66292196.66293084	2.55905	0.0002109	3.98782	8.78753e-08	chr1.137438529.137439015	3.5378	3.62315e-06	2.24526	0.000128403	chr1.57952823.57953847	2.09951	0.000367484	1.95746	1.59371e-06
chr1.66418392.66418866	2.07706	0.0068791	2.42077	0.00243019	chr1.139255447.139256006	1.81898	0.00834886	2.37253	7.00058e-05	chr1.58038945.58039821	2.55175	5.55529e-05	2.31754	5.4292e-06
chr1.66436721.66437452	2.16729	0.000452748	1.65242	0.00557263	chr1.142641294.142642281	1.77414	0.00385036	1.98083	2.08562e-05	chr1.58165147.58166130	1.63865	0.00700152	2.10906	2.99608e-07
chr1.67033216.67034056	1.63874	0.00867827	2.64003	3.21632e-05	chr1.143261763.143262560	2.2434	0.000175684	2.15253	1.30732e-06	chr1.58332626.58333966	1.78466	0.00166322	1.36401	0.00140028
chr1.67183526.67184005	2.54278	0.000689608	2.15751	0.00342644	chr1.143719320.143720305	2.11296	0.00463681	1.75908	0.00400892	chr1.59161358.59162273	2.33543	0.000243062	2.15708	5.18915e-05
chr1.67579518.67580557	1.86974	0.000672282	1.83869	0.000487861	chr1.143856862.143857977	2.47177	0.000948789	1.59823	0.00796011	chr1.59192851.59193538	3.33562	3.2376e-06	2.49619	9.25294e-06
chr1.68732711.68733189	2.32669	0.00274185	2.79278	0.000461012	chr1.144601688.144602452	2.63143	0.000449129	2.21106	0.000468746	chr1.59462666.59463276	2.23511	0.00214599	2.30819	3.89857e-05
chr1.68914738.68915127	2.27694	0.00692754	2.80275	0.0018838	chr1.145347482.145348498	2.71864	0.000391812	1.8897	0.00201398	chr1.60503449.60504044	1.89611	0.00101314	2.01369	7.93049e-06
chr1.69436861.69437630	1.86558	0.00828409	2.42493	0.000855215	chr1.145375981.145376824	1.77628	0.00545834	2.92342	2.29346e-13	chr1.60520917.60521660	2.94085	5.36614e-06	1.96462	8.12581e-05
chr1.70429385.70430162	1.99002	0.00994875	1.84871	0.00811163	chr1.146657020.146657604	2.04355	0.00630387	2.16711	0.000781191	chr1.60649252.60650631	1.99194	0.000411439	1.43608	0.000664338
chr1.70700144.70701097	2.47886	9.14497e-05	1.80947	0.0026222	chr1.149896345.149897025	2.85293	2.10636e-06	2.08627	1.06569e-06	chr1.60748827.60749964	2.06972	0.000940008	1.33983	0.00647416
chr1.71764894.71765670	2.06468	0.00509189	2.02544	0.00661844	chr1.150756900.150757768	2.54595	0.000322161	1.57361	0.00185049	chr1.60989011.60990742	2.28429	2.26987e-05	1.27928	0.000727834
chr1.71771633.71772541	2.19817	0.00212876	1.78435	0.00907113	chr1.151614086.151614882	1.7251	0.006012	1.44765	0.0025927	chr1.61527906.61529489	2.16369	6.47812e-06	1.16761	0.00014229
chr1.71971494.71972407	2.00096	0.00328036	2.11027	0.00157322	chr1.152422187.152423413	2.38334	7.70542e-05	1.54185	0.00033487	chr1.61887390.61888040	2.4642	0.00139218	2.45171	0.000200616
chr1.72746098.72746975	2.17639	0.000483536	2.48339	0.000105367	chr1.154016544.154017160	2.0991	0.00643965	1.83231	0.00507307	chr1.61939471.61940423	2.0392	0.00770475	1.81612	0.00356273
chr1.73389075.73389743	2.22602	0.00224854	2.06153	0.0044727	chr1.154696201.154697007	2.13344	0.00575265	1.74227	0.00835883	chr1.62197111.62197946	3.35751	7.44971e-08	2.40314	1.03258e-07
chr1.73443465.73445040	1.93541	0.00149061	1.78813	0.0020355	chr1.155306724.155307502	2.11294	0.000343811	1.16585	0.00543766	chr1.62254883.62255252	3.56354	6.05351e-05	2.28859	0.000754178
chr1.73991120.73991610	2.24445	0.00152072	2.29339	0.00129729	chr1.156629865.156630630	1.68733	0.00966516	1.74422	0.000589278	chr1.62267770.62268170	2.1841	0.0065284	2.47745	0.000374449
chr1.75128672.75129023	2.56467	0.00458964	3.36559	0.000625034	chr1.157439160.157439516	2.8856	0.000199208	2.16618	0.000520009	chr1.62454138.62454675	2.90159	5.10852e-06	1.66469	0.000560719
chr1.75573789.75574903	1.83371	0.00200706	1.91597	0.00105502	chr1.157577904.157579202	1.67213	0.00400897	1.40077	0.000277802	chr1.62564353.62565342	2.2406	0.000275989	1.79934	0.000209257
chr1.75877083.75877882	2.14116	0.00123773	1.67269	0.00831397	chr1.157591704.157592757	2.48542	0.000206438	1.5806	0.00113583	chr1.62573571.62574371	2.84951	2.39001e-05	2.62851	1.09317e-06
chr1.75931750.75932234	2.74599	0.000737835	2.98325	0.000525324	chr1.160530188.160530599	2.33026	0.00836515	1.97238	0.00997615	chr1.63506177.63506807	2.59433	0.000174068	1.92317	0.000637673
chr1.75978235.75979134	2.56748	0.000766857	2.96785	0.000258226	chr1.160594490.160594882	3.38927	0.000226908	2.2857	0.00248783	chr1.63578740.63579755	2.88274	6.4411e-08	1.55151	1.11423e-05
chr1.76420344.76421145	1.80889	0.00873052	2.35055	0.000648053	chr1.160608413.160609083	2.44719	0.000331169	2.04477	0.000175796	chr1.63828074.63829100	3.0001	1.71468e-06	2.106	6.21655e-06
chr1.76483986.76484831	2.2548	0.00168267	2.635	0.000306209	chr1.160663902.160664521	2.90242	6.71834e-06	2.56595	3.74792e-07	chr1.63962687.63963153	2.92008	0.000587053	2.73829	0.00016468
chr1.76872632.76873809	2.74574	2.8533e-05	2.72639	2.21055e-05	chr1.160674475.160675196	3.14274	3.17536e-05	1.84494	0.00156096	chr1.64059781.64061489	1.61513	0.00101653	1.14389	0.000514523
chr1.77567596.77569150	1.53455	0.00492583	2.17291	3.64038e-05	chr1.161145578.161146065	2.16836	0.00450929	2.12999	0.00124666	chr1.64254672.64255525	3.50598	1.0067e-07	2.31118	1.10217e-06
chr1.77625421.77626163	2.12731	0.0084197	3.05209	0.000267827	chr1.161972260.161972710	2.49754	0.00049958	2.00134	0.000751521	chr1.64361204.64362623	3.30365	3.62977e-10	1.50708	2.2742e-06
chr1.78584980.78585674	1.89846	0.00261197	2.59062	4.56027e-05	chr1.163657695.163658807	2.86459	1.7707e-05	1.73246	0.000415012	chr1.64670164.64670632	2.475	0.000418126	2.45526	2.99845e-05
chr1.78665889.78666818	2.12546	0.00180673	1.90412	0.00382965	chr1.163845012.163845614	2.96516	5.90673e-05	1.85295	0.00116954	chr1.66148252.66149439	2.0416	0.000237847	1.59888	7.41785e-05
chr1.79311839.79312664	1.94128	0.00802912	2.44769	0.000872003	chr1.164132207.164133086	1.98704	0.00256996	1.76955	0.000849067	chr1.66249079.66250191	2.1555	0.00124052	1.80351	0.000753357
chr1.79780966.79781268	2.25205	0.00476487	2.26934	0.004886	chr1.164716029.164716667	3.19841	7.7535e-05	1.76155	0.00553064	chr1.67076428.67077461	3.79707	1.98394e-07	2.85302	1.70464e-07
chr1.79902721.79903318	2.43261	0.00149852	2.12638	0.00583994	chr1.166045170.166045916	2.02889	0.00546059	1.74528	0.00363204	chr1.67252098.67252884	2.4308	0.00136734	1.77175	0.00404649
chr1.79907744.79908208	2.48731	0.00389328	2.44808	0.00440767	chr1.166189834.166190751	2.40164	0.000750159	1.74818	0.00160564	chr1.67321688.67322431	2.08913	0.00179024	1.78456	0.000835358
chr1.80073723.80074833	2.55874	1.12668e-05	2.7694	2.24739e-06	chr1.167498078.167499003	2.3047	0.000133442	2.33283	9.8443e-07	chr1.67841501.67842431	3.61511	2.16211e-06	2.45451	4.1197e-06
chr1.80371025.80371732	2.30543	0.00323079	2.40108	0.00185775	chr1.167560033.167560832	2.40074	4.58059e-05	2.38396	1.34553e-07	chr1.69512430.69513390	2.46117	1.33196e-05	2.58732	5.07322e-09
chr1.81179662.81181467	1.92729	0.000124296	1.63712	0.000495211	chr1.167572527.167573391	2.0032	0.00302837	1.37112	0.00770097	chr1.69673121.69673968	2.97726	0.000174548	1.89152	0.0037466
chr1.81739942.81740421	2.346	0.00866758	2.85082	0.00288437	chr1.167718058.167718640	1.91114	0.00441028	1.53855	0.00400297	chr1.69751230.69752252	2.93215	5.91791e-05	1.89584	0.00134708
chr1.81859118.81859891	2.42452	0.000259621	4.16013	2.0769e-07	chr1.168028022.168028896	3.28344	4.44897e-06	2.31487	1.20306e-05	chr1.70052696.70053701	2.96366	5.40802e-06	2.05373	6.98814e-05
chr1.82362062.82362547	2.44055	0.0016706	2.02919	0.00847146	chr1.168058485.168059406	3.15317	2.10636e-06	1.25579	0.00526221	chr1.70105202.70106037	2.0591	0.0020619	1.79038	0.00141669
chr1.82608328.82609206	2.26425	0.000315829	2.90622	8.51543e-06	chr1.169782275.169783481	1.76283	0.00694869	1.62076	0.00168676	chr1.70420118.70420921	3.45141	5.22309e-08	2.58903	5.60678e-09
chr1.82775143.82775995	2.32855	0.000237208	2.74574	1.67721e-05	chr1.171172694.171173194	2.8597	5.94929e-05	2.07912	0.000215243	chr1.70595196.70595835	3.2065	0.000141717	2.09376	0.00126319
chr1.82804001.82804538	2.84611	0.000149648	3.25185	1.21127e-05	chr1.172436717.172437377	2.78614	3.06563e-05	1.90298	0.000234006	chr1.70785763.70786516	2.63146	2.32201e-06	1.24801	0.00144599
chr1.83340772.83341162	2.14926	0.0072374	2.95391	0.00100341	chr1.172831104.172831795	2.04156	0.0057797	2.17422	0.000671894	chr1.70790700.70791072	3.47984	3.57552e-05	2.55718	0.000497771
chr1.83395472.83396096	1.58376	0.00969923	2.1762	0.000269197	chr1.172856194.172856890	2.21746	0.00194138	2.09512	0.000593864	chr1.70897322.70897954	3.36284	7.1317e-06	1.66382	0.00284957
chr1.83495721.83496037	2.80297	0.00259597	3.21331	0.00165252	chr1.173335813.173336745	1.62037	0.00501109	1.27146	0.00188986	chr1.71030650.71031707	3.36276	2.48433e-07	2.32023	1.26809e-06
chr1.83527512.83528201	2.71477	0.000235943	3.50167	1.03763e-05	chr1.173722745.173723418	2.464	0.00181396	1.8969	0.00446825	chr1.71108170.71108960	1.84536	0.00862806	2.24932	7.83417e-05
chr1.83551187.83552472	1.82117	0.00461214	1.90123	0.00240966	chr1.174860412.174861004	2.1246	0.00404134	2.21023	0.000419701	chr1.71285792.71286435	3.38041	2.6632e-07	1.85121	3.746e-05
chr1.83582729.83583522	2.26541	0.00184831	3.14874	0.000108705	chr1.174929225.174930256	1.52121	0.00629605	1.92447	2.16538e-06	chr1.71313690.71314193	2.56617	0.00187636	2.11335	0.00261865
chr1.84177573.84178314	1.69819	0.00622667	2.61123	2.88465e-05	chr1.175761920.175762735	2.9638	6.35371e-05	1.86161	0.00134533	chr1.71375839.71376610	3.09112	5.80858e-06	2.51102	1.44429e-06
chr1.84203422.84204065	2.89638	1.7707e-05	2.47038	0.000152076	chr1.175871944.175872492	2.52555	0.000487328	2.76278	2.54653e-06	chr1.71454604.71455159	2.58862	0.000553625	1.97929	0.00193718
chr1.84427266.84428625	2.20703	0.000314343	2.61277	3.28344e-05	chr1.175931321.175931787	2.41373	0.000195592	3.08137	3.2892e-09	chr1.71507235.71507761	4.14554	1.04868e-10	1.47513	0.000429582
chr1.85757836.85759236	1.65928	0.00473776	2.9833	5.4025e-06	chr1.176227467.176228148	2.28492	0.00114633	1.89175	0.000785212	chr1.71775550.71777121	1.48324	0.00301348	1.08265	0.000502037
chr1.85869715.85870637	1.9789	0.00114493	1.86709	0.00138133	chr1.176864807.176865269	2.20296	0.00532128	2.21623	0.00118789	chr1.72182823.72183955	1.78736	0.000217806	1.28495	6.11734e-05
chr1.86032020.86032990	1.59996	0.00443119	1.74962	0.00121855	chr1.179836609.179837334	2.61612	0.000593901	2.21775	0.000419351	chr1.72316152.72317005	2.89738	8.35655e-08	2.50586	1.01461e-10
chr1.86681528.86682202	2.66073	0.00157276	3.84594	8.98342e-05	chr1.180525472.180525983	2.18789	0.00442934	2.09486	0.00153076	chr1.72432997.72434229	2.80982	1.18641e-06	2.23569	1.65349e-06
chr1.87680833.87681416	2.14486	0.00349832	3.51727	1.7209e-05	chr1.182086472.182087305	2.10329	0.000374011	1.61674	0.00017835	chr1.72577253.72577973	2.12831	1.05925e-05	1.94379	5.35004e-10
chr1.87792591.87793989	1.64184	0.00802738	1.87279	0.00323352	chr1.182100316.182100979	2.37957	0.00250767	1.89387	0.0043145	chr1.73538367.73539354	2.05052	0.000160546	1.32272	0.000423302
chr1.88405174.88406300	2.13191	0.0014464	2.67092	0.000107224	chr1.182460281.182461263	2.30587	0.000785017	1.42676	0.00697997	chr1.73724070.73725405	1.407	0.00436869	1.664	7.74478e-08
chr1.88547126.88547842	1.94388	0.00363758	2.44812	0.000352739	chr1.184173061.184173756	3.46336	5.60404e-06	2.57238	1.7402e-05	chr1.73962139.73963715	1.26738	0.00878535	1.28913	5.07318e-05
chr1.88718478.88719405	2.29329	0.00325406	2.32929	0.00298288	chr1.184470852.184471962	2.1705	0.00135229	2.69618	1.34832e-06	chr1.73979050.73980291	1.69652	0.00103118	2.17368	8.09872e-08
chr1.89034911.89035615	2.06892	0.00402616	3.04639	9.4985e-05	chr1.184829656.184830676	2.10374	0.00210258	1.45732	0.00348987	chr1.74000397.74000997	2.36411	0.000520944	1.49429	0.00431843
chr1.89057443.89057856	3.33417	7.26583e-05	3.18618	0.00022701	chr1.185430243.185431355	2.09773	0.000399655	1.19112	0.00139782	chr1.74008190.74009036	2.11933	1.2994e-05	1.94357	7.18172e-11
chr1.89804775.89805461	1.8221	0.00757223	1.94503	0.00484177	chr1.185628310.185629160	2.32316	0.00199183	1.7898	0.0039961	chr1.74036442.74037514	2.13464	1.14428e-05	1.33088	9.48197e-05
chr1.90054610.90055446	2.30258	0.000712775	2.64592	0.00025193	chr1.185741062.185742111	1.58287	0.00389407	2.55487	1.11931e-16	chr1.74077168.74077844	1.60422	0.00407281	1.47239	0.000458034
chr1.90362113.90362602	2.35912	0.00974206	2.92606	0.00167504	chr1.187709047.187709934	2.70072	0.000227558	1.49327	0.00843905	chr1.74124066.74125621	1.50829	0.00108476	1.44628	5.85408e-07
chr1.90387003.90387552	2.41218	0.0026563	2.24807	0.00473027	chr1.188559139.188560091	2.52171	0.000197206	1.89304	0.000308393	chr1.74697266.74697825	3.50655	3.18108e-05	2.47143	0.000174575
chr1.92309481.92310672	1.78054	0.00600939	2.57321	4.58961e-05	chr1.188598930.188599921	2.49106	0.000159069	1.31486	0.00637308	chr1.75601613.75602433	2.57482	0.000272297	2.29085	2.14138e-05
chr1.92386685.92387135	3.03977	0.000227774	3.92072	2.68277e-05	chr1.189606720.189607455	2.34139	0.00299026	2.01816	0.00188052	chr1.75672155.75673110	3.02365	2.91413e-05	2.59339	5.9395e-06
chr1.92712180.92712865	2.26534	0.00240521	3.0209	0.000199707	chr1.190128559.190129073	2.06152	0.00707757	1.87546	0.00341893	chr1.75733470.75734142	2.273	0.00360675	2.43001	0.000293217
chr1.93698415.93699923	1.59713	0.00916411	2.45569	8.64634e-05	chr1.190137588.190138532	2.50586	0.000129047	1.26803	0.00782036	chr1.76448587.76448984	4.04479	3.00396e-07	3.77431	2.01529e-09
chr1.93775262.93775697	2.3418	0.00401338	2.61056	0.00149738	chr1.190259361.190260156	2.26438	0.000252839	1.96234	3.05299e-05	chr1.77283980.77284525	2.26998	0.000294759	1.45784	0.00124348
chr1.94183738.94184474	2.40473	0.000553501	2.98736	6.31482e-05	chr1.192614998.192615716	2.10906	0.00502795	1.91443	0.00290812	chr1.77350740.77351314	3.08922	8.11639e-05	3.22008	1.22508e-06
chr1.95074709.95075797	2.03556	0.00392692	2.12453	0.00213658	chr1.192696319.192696922	2.21579	0.00960254	2.04521	0.00779649	chr1.78510585.78511280	2.49805	0.00127296	2.29319	0.000445032
chr1.95826478.95827025	2.28909	0.00736319	3.15045	0.00101273	chr1.193999710.194000151	2.32769	0.00844189	2.17761	0.00475167	chr1.78852119.78853338	1.88955	0.000944262	2.03266	3.32462e-07
chr1.96003040.96003529	2.20357	0.00348205	2.16323	0.00399145	chr1.194473833.194474436	2.84521	0.000115615	2.65389	2.13536e-05	chr1.78935037.78935747	2.59407	2.72367e-05	2.48336	6.66862e-07
chr1.96189547.96190183	2.51056	0.000215568	4.31747	1.27215e-07	chr1.194518780.194519739	2.30018	0.000385107	1.40882	0.00478718	chr1.78936953.78937756	3.1992	7.69945e-08	3.02608	2.41278e-10
chr1.96549799.96550776	2.35114	0.000560554	2.31967	0.000438041	chr1.194617476.194617990	2.5449	0.000300353	2.25946	9.74864e-05	chr1.79460760.79461283	2.32644	0.00783499	2.32714	0.00166304
chr1.96595768.96596695	2.3447	0.000584669	2.62498	0.000329515	chr1.194745198.194746266	1.90573	0.00140513	2.01627	9.69068e-06	chr1.80441639.80442227	2.93619	0.000351034	2.32581	0.000727517
chr1.96922660.96924191	1.82386	0.00365464	1.87519	0.00169146	chr1.194834929.194835991	2.93095	3.89406e-06	2.86294	9.02055e-09	chr1.80552264.80552948	3.81874	1.26984e-11	2.64129	7.77112e-11
chr1.97753021.97753833	2.343	0.00160093	2.17689	0.00222382	chr1.195077719.195078427	2.04618	0.0025583	1.99269	0.000331031	chr1.80604324.80604719	2.73352	0.000488418	2.07264	0.00156639
chr1.98199854.98200554	2.05582	0.00342113	3.38377	1.73735e-05	chr10.4777898.4778608	3.12446	0.000398302	2.08731	0.00374056	chr1.80676585.80677495	3.10289	6.97648e-07	2.394	7.25334e-07
chr1.98711389.98712330	2.39227	0.000287555	2.15021	0.00119148	chr10.6785864.6786333	3.06469	9.58409e-05	2.10154	0.000798463	chr1.82019091.82019658	2.19807	0.00404399	1.69311	0.00745215
chr1.99285223.99286327	2.21708	0.000236068	2.56824	2.08697e-05	chr10.9086697.9087503	2.45577	0.000403007	1.50797	0.00401673	chr1.82364078.82365079	2.14339	0.000520545	1.41824	0.00275609
chr1.99679892.99680789	2.37013	0.00162426	2.49363	0.00119718	chr10.10896970.10897744	2.32304	0.00263044	1.66962	0.00775936	chr1.82783562.82784047	2.62478	0.00261294	2.08283	0.00492767
chr1.100842842.100843926	3.16971	5.33278e-06	3.64735	9.51672e-07	chr10.11098328.11099218	2.99559	4.44897e-06	2.18488	1.55551e-06	chr1.83101768.83102711	2.79284	1.66191e-05	1.63548	0.000471828
chr1.101807558.101808773	2.29673	0.000130852	3.9262	3.88542e-08	chr10.11754048.11754502	2.65137	0.000978546	1.76285	0.00682451	chr1.83224389.83224760	2.29942	0.000916497	2.04479	0.000354519
chr1.102185500.102186479	2.1902	0.000788116	2.71615	3.29316e-05	chr10.12225208.12225705	1.83089	0.0075826	1.95002	0.000491205	chr1.83528854.83529355	2.53149	0.00569825	3.20646	5.93555e-05
chr1.102235377.102236197	2.75683	1.50984e-05	2.8673	3.91154e-05	chr10.12805532.12806239	3.81208	9.9175e-09	2.55082	5.3699e-08	chr1.83565606.83566236	3.11402	1.06023e-05	1.91552	0.00028705
chr1.102675067.102675559	2.09825	0.00882669	2.34909	0.00536746	chr10.14789898.14790755	1.8708	0.00204686	1.27731	0.00668745	chr1.83607818.83608446	3.78302	1.18909e-06	1.84952	0.000710775
chr1.102848637.102849194	2.26287	0.00243383	2.76165	0.000417444	chr10.15391942.15392724	1.82835	0.00201172	1.57155	0.000208955	chr1.83645655.83646462	2.69826	2.01804e-05	1.81465	0.000149056
chr1.102878052.102878773	1.9448	0.00533001	2.33645	0.00111385	chr10.18340620.18341354	2.12563	0.00325017	1.69558	0.00399149	chr1.83812863.83813822	2.24429	0.000610447	1.9423	0.000206336
chr1.102898803.102900000	1.99629	0.00232964	2.23284	0.000671476	chr10.19744149.19744821	1.87057	0.00804376	1.61971	0.00430803	chr1.83951430.83952613	2.85981	2.72245e-06	2.39202	2.287e-06
chr1.103076182.103077227	1.97054	0.00661493	2.55122	0.000158669	chr10.19829208.19829737	2.44429	0.000851163	1.47889	0.00700372	chr1.84040951.84041679	3.06911	2.37601e-05	2.01285	0.000147517
chr1.104241266.104242278	2.396	5.55809e-05	3.82536	1.02559e-08	chr10.20454286.20455057	2.76021	9.6831e-06	1.96334	1.80846e-05	chr1.84056291.84057742	1.89678	0.00026519	2.16565	3.26332e-08
chr1.104374887.104376033	2.24715	0.00060617	3.10597	6.1662e-06	chr10.20463460.20464492	2.74517	1.96485e-05	1.5341	0.00102979	chr1.84079606.84080248	2.17566	0.0039681	1.69726	0.00687139
chr1.104773125.104773625	1.90106	0.00162796	2.41319	2.82985e-05	chr10.20472597.20472950	3.18768	5.3156e-05	1.99935	0.00133222	chr1.84467399.84468071	2.04996	0.00485131	2.15755	0.000489007
chr1.105433895.105435512	1.54227	0.00862771	2.32066	5.85299e-05	chr10.20474830.20475513	1.66372	0.00885299	1.65277	0.00100923	chr1.84554171.84555064	2.06522	0.00150201	1.44264	0.00212851
chr1.105549711.105550717	2.41929	0.000534671	2.35999	0.000200464	chr10.20733289.20734377	1.70661	0.00443239	1.85563	2.78185e-05	chr1.84600882.84601363	2.44682	0.00117318	1.6642	0.00756479
chr1.105832567.105833293	2.5446	0.00203587	2.07198	0.00861881	chr10.21805221.21806273	2.66232	1.3509e-05	2.29252	6.91744e-07	chr1.85965378.85966395	1.84339	0.000494342	1.19621	0.00162286
chr1.105876348.105877301	1.55459	0.00388304	2.93228	4.29271e-08	chr10.21859548.21860203	2.47513	0.000705427	1.5907	0.00761369	chr1.85977555.85978392	3.55507	6.51377e-08	3.36677	3.90414e-11
chr1.105944742.105945598	2.22621	0.000162804	3.08439	4.99335e-07	chr10.24210785.24211667	3.08142	3.26549e-07	1.32465	0.00048495	chr1.86771411.86772132	2.02873	0.0073222	2.20667	0.000568857
chr1.105974792.105975877	3.0396	2.60355e-06	3.34665	4.45079e-07	chr10.24244237.24245290	1.6341	0.00783521	2.07434	1.21424e-05	chr1.87930362.87931189	2.21629	0.000199707	1.99174	1.65837e-05
chr1.106042818.106043609	2.7512	2.43862e-05	3.12778	1.34017e-06	chr10.24991731.24992509	2.33236	0.00184855	2.08012	0.000985861	chr1.88331913.88332681	2.08281	0.00278929	1.84487	0.00122936
chr1.106352791.106353739	1.67446	0.00598887	1.5115	0.00970512	chr10.27025092.27025675	2.10678	0.00387611	2.26643	0.000479985	chr1.88531494.88532359	4.34085	6.60853e-12	1.90483	3.63969e-07
chr1.106627087.106627814	1.75168	0.00676808	2.81562	6.33335e-06	chr10.28187256.28187927	3.06503	1.62931e-06	1.66858	0.00029004	chr1.88879363.88879870	2.181	0.007128	1.68759	0.008866
chr1.106739787.106740415	2.0448	0.000626506	2.00647	0.000658833	chr10.28873389.28875045	2.70915	2.9307e-06	2.39197	6.09532e-08	chr1.88997792.88998366	2.78117	0.0010793	1.82612	0.00713963
chr1.107034080.107034908	1.95708	0.00845314	2.53743	0.000802623	chr10.28959977.28961025	2.57942	3.88454e-06	3.27637	9.45991e-18	chr1.89112267.89113077	3.53544	1.0281e-06	2.53566	3.29549e-06
chr1.107581044.107581639	2.89503	2.76372e-06	3.38816	7.71488e-08	chr10.30091078.30091560	2.91442	7.84319e-05	2.01328	0.000498086	chr1.89308550.89309292	2.35055	0.000153765	1.7063	0.000128184
chr1.107672568.107673469	2.14621	0.00209483	2.90029	9.27111e-05	chr10.30994605.30995339	2.09962	0.00526419	1.76145	0.00555255	chr1.89386041.89386827	1.98403	0.00257164	1.94547	0.000254008
chr1.107805772.107806358	1.75036	0.00194695	2.87971	5.30419e-07	chr10.31830499.31831317	2.82864	0.00010124	1.80175	0.00266668	chr1.89642753.89644192	1.841	0.000178382	1.79359	2.54351e-07
chr1.107985450.107986876	1.92081	0.000389397	2.94127	8.93467e-08	chr10.34043704.34044369	2.39985	0.00215706	1.84127	0.00473532	chr1.89688509.89689349	2.02197	0.000365222	1.6695	7.79207e-05
chr1.108389860.108390970	2.20465	0.000476758	2.30388	0.000165459	chr10.34088275.34089213	2.17304	0.00190696	2.34594	2.57818e-05	chr1.89703957.89704920	3.0374	1.40012e-05	2.65652	4.69199e-06
chr1.109223590.109224280	3.27974	3.5723e-06	3.10151	1.17717e-05	chr10.34663853.34664565	2.13603	0.000829932	1.39164	0.00397717	chr1.89798519.89799369	2.45175	0.000119009	1.73751	0.000117537
chr1.109512432.109513255	2.14501	0.000988468	3.26506	6.30457e-06	chr10.34904171.34905372	1.63773	0.00692847	1.47536	0.000852553	chr1.90006530.90007681	2.3367	9.32442e-06	1.53593	2.67595e-05
chr1.110004466.110005505	2.17035	0.000872586	2.53189	6.65096e-05	chr10.36409200.36409859	2.62382	0.000480004	1.78546	0.00377054	chr1.90256506.90257271	2.13529	0.000329689	2.2213	6.51377e-06
chr1.110048337.110049116	2.26031	0.00384289	2.08634	0.00943996	chr10.37416017.37416878	2.11379	0.000934772	1.63657	0.000776889	chr1.90412794.90413342	2.5671	0.00408359	2.11459	0.00331084
chr1.110078153.110079068	1.72875	0.00406366	1.66176	0.00392576	chr10.37428725.37429697	3.26841	1.92428e-06	1.87965	0.000155824	chr1.91042405.91042775	2.39628	0.00215592	2.55471	0.000143966
chr1.110305825.110306568	1.91234	0.00853336	3.08333	0.000137497	chr10.38717567.38718425	2.30238	0.0022406	1.65257	0.0082448	chr1.91557545.91557938	2.54363	0.00610797	1.9641	0.00890615
chr1.110475560.110476483	1.85754	0.00470456	2.04	0.00184314	chr10.39095269.39095913	2.64991	0.000155732	2.22847	9.28236e-05	chr1.92714770.92715670	2.38254	0.000788399	1.66174	0.00309075
chr1.110625347.110625868	2.27667	0.00736834	4.00548	4.70344e-05	chr10.39586779.39588329	1.41686	0.0089409	1.16103	0.000469725	chr1.92737566.92738389	3.88367	5.41154e-09	1.19288	0.000870483
chr1.110724783.110725316	1.98218	0.00783958	2.76156	0.000466102	chr10.40481829.40482865	2.33116	0.000322029	2.05942	9.35727e-06	chr1.92774466.92775712	2.26598	4.47485e-05	1.5819	0.000151975
chr1.110754688.110755152	2.42148	0.00119679	2.84105	0.00100557	chr10.40970809.40971916	1.821	0.0016736	1.67018	4.3436e-05	chr1.94932970.94933691	3.06406	5.5668e-05	2.20503	0.000368903
chr1.111833695.111834357	2.29006	0.00255412	2.15393	0.00388412	chr10.41035641.41036278	2.49577	0.000831956	2.00281	0.00108378	chr1.95839620.95840078	3.34217	3.29316e-05	2.16463	0.000359231
chr1.112675784.112676434	2.61563	0.00171705	2.34596	0.00488289	chr10.41063414.41064225	2.47999	8.74614e-05	2.07607	1.58113e-05	chr1.96054730.96055306	2.30693	0.000819196	2.83737	2.67141e-06
chr1.113767388.113767923	2.42429	0.00405509	2.46177	0.00518146	chr10.41223555.41224062	2.05968	0.00520487	1.9261	0.00189383	chr1.96183582.96184381	1.98504	0.00805316	1.73577	0.00674118
chr1.114336889.114337404	2.61088	0.00168832	2.15609	0.00966912	chr10.42160262.42161053	2.64232	0.000959845	2.27025	0.000429479	chr1.97629890.97630806	1.77827	0.000435357	1.07858	0.000189328
chr1.114681043.114681774	1.76432	0.00534744	1.82394	0.00363997	chr10.43634331.43635144	3.62205	1.52588e-09	2.42401	1.19244e-09	chr1.98064754.98065772	2.39863	4.35387e-05	1.17213	0.00563794
chr1.114862806.114863712	2.08831	0.00131565	2.78109	4.44742e-05	chr10.43745842.43746712	2.68228	2.14998e-06	3.65294	1.52542e-16	chr1.98156440.98157396	2.90591	2.71792e-06	1.22931	0.00274179
chr1.114880199.114881126	2.23062	0.00403114	1.94565	0.00593782	chr10.44366303.44367764	2.04283	0.000343076	1.65331	1.4791e-05	chr1.99488229.99489068	3.52908	6.8271e-07	2.87326	2.75991e-07
chr1.115599698.115600612	2.00147	0.00983225	3.53487	8.27824e-05	chr10.49528273.49528892	2.7515	0.000216286	1.53224	0.00828583	chr1.99689650.99690522	2.95519	2.49791e-05	2.29012	2.71401e-05
chr1.115668345.115668731	3.18747	0.000209325	2.68331	0.00125222	chr10.49822629.49823491	3.33702	2.77679e-05	2.14997	0.000845741	chr1.99838405.99839367	3.49607	5.86643e-09	2.09156	2.24099e-07
chr1.116192059.116193000	1.9629	0.00295098	1.6243	0.00914129	chr10.50066537.50067129	3.11241	9.1422e-05	2.32141	0.000409194	chr1.100346896.100347339	2.2497	0.005191	1.7955	0.00716085
chr1.116243351.116244586	2.56469	6.32426e-06	2.06427	8.65357e-05	chr10.50079154.50080152	1.63567	0.00876726	1.61238	0.000347342	chr1.105172228.105173394	1.42333	0.00696664	1.99822	2.2157e-06
chr1.116475739.116476832	2.08285	0.000275114	1.5338	0.00465333	chr10.53537174.53538350	1.87134	0.00589493	1.78428	0.000545525	chr1.105241971.105242861	3.40214	2.56605e-09	3.0686	1.31195e-12
chr1.118810106.118810940	2.34351	0.000264778	3.03758	4.82057e-06	chr10.54156528.54157545	2.04407	0.0037301	1.69529	0.00496371	chr1.105243247.105243703	3.09646	1.97271e-05	2.18546	8.56691e-05
chr1.119893621.119894234	1.51035	0.00651925	3.14572	1.05281e-07	chr10.54201554.54202664	2.4099	0.000117319	1.66394	0.000364502	chr1.105255455.105256229	3.4536	0.00100019	2.51599	5.87593e-15
chr1.120136012.120136973	1.89231	0.00235138	1.61684	0.00972911	chr10.54334478.54335209	2.7498	4.90704e-05	2.10909	5.10733e-05	chr1.105365255.105366006	2.13875	0.00188541	1.80069	0.00157225
chr1.123625608.123626027	1.92356	0.00930355	2.07732	0.00591571	chr10.55038412.55039094	2.05734	0.00826383	1.92336	0.00408008	chr1.106194858.106195405	2.37105	0.000291324	1.71367	0.000861838
chr1.123923755.123924657	2.24619	0.000216818	2.43899	1.8376e-05	chr10.55058628.55059630	2.29365	0.000460602	2.47805	4.33341e-06	chr1.106449351.106450183	4.23204	4.01759e-11	2.60245	1.06964e-09
chr1.124705982.124706834	1.82969	0.00260804	2.12273	0.000383925	chr10.55200447.55201141	2.2571	0.00167221	1.9445	0.00108203	chr1.106513876.106515047	1.48867	0.00395018	1.60454	9.00795e-06
chr1.124710417.124710863	2.41288	0.00109186	3.19094	3.52791e-05	chr10.56696326.56697367	2.54412	3.22314e-05	2.40318	1.25762e-06	chr1.107702998.107703648	2.88384	1.70428e-06	2.52908	4.87504e-08
chr1.124777322.124778330	1.93291	0.00498738	1.81175	0.00928861	chr10.58885313.58886279	1.68811	0.00439368	1.13965	0.00601122	chr1.108046775.108047698	2.90414	6.5012e-07	1.57582	0.000102464
chr1.124825599.124826439	2.14332	0.00180673	2.05734	0.00159324	chr10.59059918.59060690	2.61715	4.73309e-05	2.53982	1.02468e-06	chr1.108194646.108195382	3.24566	1.17195e-06	2.28764	8.17619e-06
chr1.125295642.125296103	2.54062	0.00190025	2.22857	0.00759509	chr10.59829587.59830104	3.59234	6.14681e-05	2.01306	0.0049332	chr1.108198858.108199289	2.74316	0.00221073	2.16501	0.0025717
chr1.127933629.127934864	1.9956	0.000214938	2.12956	3.98007e-05	chr10.60502293.60502964	2.06908	0.00494654	2.57982	7.61242e-05	chr1.108252996.108253744	2.77801	3.60466e-06	1.63525	0.000180587
chr1.127975594.127976259	2.03948	0.00131297	2.01229	0.00125883	chr10.61723110.61723673	1.97218	0.00944981	2.17222	0.000472342	chr1.109664149.109664852	2.35502	0.00203101	2.08973	0.00152559
chr1.128382313.128383149	2.16838	0.00269535	1.94157	0.00685839	chr10.62147727.62148679	3.021	2.96262e-05	1.64099	0.00253568	chr1.109824500.109825417	3.2975	3.10316e-06	1.56511	0.00177046
chr1.128466631.128467511	1.73944	0.00616042	1.93781	0.00172707	chr10.63748480.63749395	2.90526	5.13262e-06	1.89596	4.49227e-05	chr1.111668723.111669955	4.05117	1.21978e-11	3.25878	1.10724e-13
chr1.128786778.128787645	2.59462	4.5301e-05	2.46654	0.000146913	chr10.64130366.64130758	2.58831	0.00305896	2.52745	0.000603136	chr1.111899746.111900688	2.66818	4.10153e-05	2.52874	1.39875e-06
chr1.129421180.129422024	2.01978	0.00608843	2.28483	0.00168673	chr10.64190498.64191637	2.2875	0.000307662	1.76707	0.000302301	chr1.112028465.112029138	3.21541	7.67375e-07	1.20932	0.00710407
chr1.129484142.129485067	1.91488	0.00282319	2.63687	7.22888e-05	chr10.64305595.64306488	2.32544	5.71656e-05	1.17801	0.00353503	chr1.112128857.112129681	3.61619	1.3027e-10	2.54684	3.24939e-11
chr1.130728459.130729070	2.49465	0.000221941	2.163	0.00176638	chr10.64406191.64407103	2.43066	0.00215134	1.94623	0.00443611	chr1.112262793.112263463	2.65653	0.000261113	2.55204	2.50112e-05
chr1.131167292.131168445	2.08644	0.000427521	1.90523	0.00161862	chr10.64509232.64509933	2.28998	0.000902304	2.43624	3.14294e-05	chr1.112272723.112273358	2.77169	9.81353e-05	2.57292	8.40015e-06
chr1.131293218.131294456	1.50493	0.00392934	2.01178	4.65891e-05	chr10.65551115.65551717	2.07824	0.00679812	1.65538	0.00493473	chr1.112472702.112473311	2.15279	0.00607256	1.86347	0.00484195
chr1.131331172.131331677	2.44265	0.00100067	3.45437	3.0305e-05	chr10.66142776.66143327	2.8635	0.000600504	2.36548	0.000725129	chr1.112762971.112763717	3.49265	1.00422e-06	1.33794	0.00664111
chr1.131770573.131772010	1.78949	0.00142678	3.0448	6.21525e-08	chr10.67065721.67066614	1.86786	0.00226346	1.38635	0.00308386	chr1.113566893.113567778	3.89305	1.77394e-10	2.91525	5.18233e-11
chr1.131820679.131821336	2.33588	0.000901218	2.92636	6.34521e-05	chr10.67468616.67469457	2.15398	0.0016483	1.52913	0.00477775	chr1.113639784.113640317	3.24756	1.70428e-06	2.79116	1.94815e-07
chr1.132043466.132044254	2.39458	0.000259038	2.02144	0.000459582	chr10.67748168.67748937	1.99195	0.00713453	1.97836	0.000776157	chr1.113965188.113966488	2.2495	6.33135e-07	1.09296	2.48344e-05
chr1.132893245.132894033	1.73915	0.0078287	1.68627	0.00878767	chr10.67751742.67752558	2.13228	0.00280911	2.01155	0.00047633	chr1.113989766.113990469	2.43811	0.00074763	1.92733	0.000950214
chr1.133178660.133179025	2.39972	0.00414289	2.87239	0.00110663	chr10.74538159.74538991	3.19059	9.10303e-06	2.57525	6.69875e-06	chr1.113995648.113996665	2.35041	0.00018142	1.95907	8.40137e-05
chr1.133286799.133287719	2.32409	0.00173427	2.80662	4.45607e-05	chr10.75340702.75341361	1.87072	0.00957079	1.90503	0.00174619	chr1.114247969.114248722	3.56936	2.79351e-07	2.70519	4.44163e-07
chr1.134624747.134626206	1.88448	0.00115758	1.77812	0.00115462	chr10.75405924.75406594	2.01463	0.0080403	1.6648	0.00897065	chr1.114434259.114434919	2.73238	3.5724e-05	2.54422	1.1782e-06
chr1.135380102.135381183	1.64124	0.00330275	2.25848	2.8975e-05	chr10.75411397.75411934	2.66795	0.000534671	2.82176	1.31017e-05	chr1.114667327.114668258	4.73272	2.35294e-12	2.94504	1.23403e-11
chr1.135726990.135727235	3.52668	0.000268618	3.33903	0.00154201	chr10.75471275.75471964	2.9322	0.000116075	1.7197	0.0040511	chr1.114835679.114836381	2.22926	0.000101189	2.2376	4.83762e-07
chr1.135946161.135946872	2.55581	0.00010727	3.7172	5.56235e-07	chr10.75474885.75475467	2.58959	0.000468385	1.79461	0.0024221	chr1.114837951.114838363	3.19571	4.46003e-05	2.48406	4.44178e-05
chr1.136470487.136470884	1.89668	0.00904014	3.61069	1.90836e-05	chr10.75725038.75725925	1.91042	0.00847181	1.83753	0.00164768	chr1.115181948.115182753	3.04207	4.8687e-05	2.1664	0.000155966
chr1.136683096.136684556	1.69316	0.00183652	2.45627	3.40573e-06	chr10.77869531.77870122	2.30199	0.00364542	1.78077	0.00806894	chr1.115275428.115276428	2.54936	2.79355e-05	1.96055	2.67081e-05
chr1.137252126.137253024	2.7959	1.07882e-05	3.42394	1.09314e-06	chr10.80842218.80842741	2.3407	0.00135357	1.94171	0.00121429	chr1.115997149.115997728	3.64334	4.18527e-06	2.14225	0.000227256
chr1.137302704.137303674	2.40647	0.000152946	2.28497	0.000247523	chr10.80883701.80884564	2.69603	0.000130203	2.98053	5.16598e-07	chr1.116292812.116293522	3.28382	3.20604e-06	2.76147	7.47094e-07
chr1.137427300.137428652	1.55584	0.0091745	1.56304	0.00856282	chr10.83098936.83099321	2.44109	0.00200355	2.15981	0.00133167	chr1.117067161.117067719	3.15709	6.17263e-06	1.44573	0.00453866
chr1.137486621.137487345	2.28318	0.00162166	3.01246	0.00013123	chr10.84222021.84222990	2.51345	0.000572113	1.84498	0.00174109	chr1.117067766.117068504	2.78794	8.06374e-05	1.68265	0.00168191
chr1.137583775.137584613	1.93098	0.00314305	2.26564	0.000528353	chr10.84820904.84821743	3.63558	2.65024e-06	2.20581	0.000156898	chr1.118592659.118593425	1.71027	0.00564146	2.40933	4.6737e-06
chr1.137664221.137665424	1.72438	0.00681608	1.91813	0.00229659	chr10.86099976.86101097	4.21646	3.73179e-13	2.99012	1.20215e-15	chr1.118904348.118904997	2.55481	3.94019e-05	1.75401	0.000192607
chr1.137972164.137973443	1.36385	0.00966782	2.37706	9.39935e-06	chr10.87816415.87817458	1.73383	0.00127657	2.10123	3.3784e-09	chr1.119047358.119048375	2.3194	0.000120005	1.55013	0.000626441
chr1.138006554.138007328	2.01669	0.00305963	2.6242	0.000197288	chr10.88598196.88598735	2.14305	0.00193861	2.67794	7.32474e-06	chr1.119103339.119103897	3.19518	4.36022e-05	2.25069	0.000178033
chr1.138061896.138062678	2.53828	0.000729362	2.47699	0.0011958	chr10.90112675.90113170	2.05048	0.00293721	1.73345	0.00235141	chr1.119108542.119109404	3.22866	3.13135e-10	2.63867	8.83446e-14
chr1.138250720.138251262	2.4383	0.00381714	2.35118	0.00636452	chr10.90114192.90114805	2.66533	0.000741585	1.81953	0.00514451	chr1.119420848.119422479	1.23205	0.00538008	1.14236	1.47872e-06
chr1.138256132.138256837	2.63697	0.000385121	2.45092	0.000611381	chr10.90721556.90721894	2.3786	0.00115507	2.18398	0.000189328	chr1.119486703.119487111	2.4149	0.000156767	1.92027	0.000114278
chr1.139008529.139009481	2.17671	0.00106822	3.01724	2.24626e-05	chr10.91719563.91720588	2.04926	0.000663693	1.86431	1.16428e-05	chr1.120002648.120003179	2.37258	0.00349303	1.91348	0.00372427
chr1.139180606.139181373	1.68576	0.0075837	2.2743	0.00033985	chr10.94794562.94795320	1.97643	0.000551256	2.29249	1.43948e-07	chr1.120295063.120296094	2.61319	1.13674e-05	1.99328	1.78753e-05
chr1.139303031.139303723	2.24046	0.00282808	2.23957	0.00259731	chr10.95086849.95087625	2.34669	0.000288052	1.34783	0.00258044	chr1.120468606.120469445	1.7781	0.00135287	1.14224	0.00315466
chr1.139342078.139342687	2.50022	0.000212327	2.39664	0.000304037	chr10.96067201.96068112	2.27946	7.81874e-05	2.19174	1.44546e-08	chr1.120538139.120538785	2.6399	7.08523e-05	2.09771	0.000282953
chr1.140294714.140295805	1.57543	0.00914439	2.01202	0.000371772	chr10.98036995.98037538	2.45686	0.0023518	1.79191	0.00804248	chr1.120555293.120555823	2.68661	7.88322e-05	2.83315	1.69234e-07
chr1.140434656.140435367	2.57379	5.25997e-05	2.0528	0.000575864	chr10.98421671.98422140	2.21212	0.00193303	2.43158	6.97209e-05	chr1.120557008.120557970	2.75185	3.33929e-07	1.92434	1.86011e-07
chr1.140618994.140619868	2.21187	0.000475784	2.57602	4.38838e-05	chr10.99050856.99051603	2.26364	0.00169118	1.97113	0.000805216	chr1.120669225.120670297	2.19025	0.000212766	2.12712	2.66344e-06
chr1.141782925.141783923	2.8717	1.99278e-06	2.48935	4.65018e-06	chr10.99654312.99654840	3.38995	3.16062e-07	2.36526	1.92704e-06	chr1.121053501.121054515	2.12905	0.000629985	1.52966	0.00186237
chr1.141813203.141814239	2.77872	1.32087e-05	2.63393	2.56404e-06	chr10.99900977.99902089	1.85303	0.00260853	1.29728	0.00479204	chr1.121147807.121148407	4.23143	2.75008e-07	2.16835	8.24865e-05
chr1.141842424.141843682	2.14274	0.000886402	2.4286	4.61691e-05	chr10.102286417.102286898	2.50698	0.00254002	1.90155	0.00690558	chr1.121199311.121200294	3.29118	1.45622e-08	2.5758	2.53054e-10
chr1.141911601.141912476	2.79938	2.2755e-05	2.45094	9.44744e-05	chr10.105119860.105120756	1.80004	0.00625229	2.00758	0.000212257	chr1.121221122.121222031	3.34799	1.04647e-07	2.7883	1.89843e-08
chr1.141974348.141975395	2.29787	0.00125305	2.26021	0.00155242	chr10.105688929.105690154	1.74273	0.00523098	2.24105	1.25234e-05	chr1.121226510.121227433	2.20227	0.000935245	1.89489	0.000840059
chr1.142652775.142653582	1.72533	0.0031436	1.86023	0.00128028	chr10.107405341.107406045	3.14813	2.0258e-07	1.63253	5.9573e-05	chr1.121285802.121286523	3.50002	2.48433e-07	1.88441	6.64227e-05
chr1.142655319.142655990	1.88713	0.0033624	2.99949	1.4372e-05	chr10.107518984.107520161	2.13123	0.00220421	2.08728	0.000303793	chr1.121754262.121754624	2.57338	0.00109773	1.58713	0.00992132
chr1.142947288.142948337	2.26849	0.00189265	1.98515	0.00603012	chr10.109466286.109467093	1.94811	0.00539004	1.619	0.00488157	chr1.121829945.121830891	2.48414	1.4945e-06	1.77842	4.813e-07
chr1.142971362.142971903	2.03174	0.000597081	1.5288	0.00689205	chr10.109644926.109645968	2.17096	0.00504604	1.61024	0.00910962	chr1.121870166.121870848	2.91595	1.49775e-05	1.8906	0.000303568
chr1.142982499.142983511	1.99431	0.00148915	1.87986	0.00183127	chr10.110266279.110267276	2.06901	0.00028716	1.5405	0.000115159	chr1.122060159.122060663	2.38627	0.00120475	1.74183	0.00424854
chr1.143097025.143098045	1.9555	0.00794183	2.50199	0.000818319	chr10.110647148.110648106	1.88855	0.00307166	1.23031	0.00506137	chr1.122095508.122096389	2.82317	6.21082e-07	2.02862	1.18523e-06
chr1.143200080.143200821	1.99498	0.000901218	2.27321	0.000237101	chr10.111147812.111148325	2.83909	0.000624873	2.06852	0.00275247	chr1.122111983.122112799	2.4504	0.000610407	2.04003	0.000505557
chr1.144127519.144128368	1.50579	0.0055584	2.48684	3.37917e-06	chr10.111171256.111172450	1.70348	0.00190344	2.30597	5.84419e-09	chr1.122303537.122304274	1.85304	0.00658021	1.73265	0.00207118
chr1.144166772.144167450	2.13278	0.00123262	3.15217	5.47463e-06	chr10.111305769.111306351	2.31335	0.00344508	2.47956	0.00037747	chr1.122321663.122322370	2.51632	0.00125184	1.65227	0.00578722
chr1.144626230.144627051	2.29246	0.000903731	2.49595	0.000308383	chr10.111437754.111438580	1.90205	0.00590774	1.98264	0.00043526	chr1.122339507.122340484	2.48645	0.00011954	1.711	0.000444456
chr1.144667474.144668009	2.06965	0.0077016	2.78408	0.000824338	chr10.111566601.111567802	1.74828	0.000730991	1.25429	9.95622e-05	chr1.122393595.122394597	1.51613	0.00138929	1.26513	3.62664e-05
chr1.144682004.144683092	2.68875	4.58059e-05	2.73768	3.87173e-05	chr10.111711360.111712386	2.36084	0.000218051	1.37062	0.00244239	chr1.122556607.122557074	2.88142	0.000498136	2.57223	0.000191968
chr1.144902952.144903660	2.1628	0.0017578	3.33968	1.78456e-06	chr10.111935861.111936411	2.45899	0.000544551	2.29116	0.000125655	chr1.123065019.123065825	3.21278	3.60445e-06	2.74594	4.50492e-07
chr1.144916567.144917533	2.42275	0.000631736	2.12091	0.00271473	chr10.112553299.112554240	2.37609	9.02354e-05	1.347	0.00269026	chr1.123331403.123331919	2.97962	0.000317794	2.1618	0.000587268
chr1.145074059.145074586	2.95832	3.98367e-05	3.74361	2.73476e-06	chr10.113352699.113353832	1.82633	0.00728979	2.05332	0.000291397	chr1.123374314.123375098	2.48062	0.000823352	1.62044	0.00571356
chr1.145227019.145227972	2.27399	0.00048202	3.44828	2.02392e-06	chr10.115145969.115146895	2.92009	5.88466e-06	1.45081	0.000738588	chr1.123774493.123775157	2.62467	0.000104563	2.26667	2.68303e-05
chr1.145480301.145480846	2.2369	0.00425013	2.22522	0.00731829	chr10.116298773.116299959	2.55234	0.000136076	1.79346	0.000548862	chr1.123788445.123788993	3.06322	0.000181734	2.16916	0.000677855
chr1.145707572.145708506	2.29768	0.00267833	2.15125	0.00513436	chr10.119340830.119341655	2.79264	0.000314659	2.13336	0.0008334	chr1.124884090.124884939	2.23692	0.000253759	1.22008	0.0081436
chr1.145846840.145847490	2.39307	0.000495363	1.85583	0.00454178	chr10.119531054.119531804	1.90056	0.00241652	1.44331	0.00245509	chr1.124917443.124918475	3.55384	1.37599e-07	2.28261	2.64643e-06
chr1.146231567.146232702	2.20161	0.000191983	2.56976	1.41642e-05	chr10.122032858.122033623	2.35828	0.000624091	1.77106	0.00129753	chr1.125077686.125078501	2.67769	0.000132562	2.54483	1.07655e-05
chr1.146807342.146808011	2.21566	0.00701029	2.56833	0.00287592	chr10.124082662.124083233	2.60588	0.00109796	2.22445	0.00107015	chr1.125650377.125651132	3.10443	4.22547e-06	2.26735	1.45166e-05
chr1.147031350.147031773	2.55968	0.000683057	2.69062	0.000591261	chr11.3846235.3846774	2.32255	0.00567535	2.07511	0.00347185	chr1.125657387.125658378	3.07763	3.42273e-07	1.59002	0.00025748
chr1.147411464.147412502	1.64559	0.00738218	2.68685	2.46289e-05	chr11.4388024.4388461	2.71429	0.0029392	2.16372	0.00370206	chr1.125743760.125744283	2.73037	0.000678681	2.87551	2.98079e-05
chr1.147729982.147730740	2.50123	0.00430251	2.3636	0.00330175	chr11.5311498.5312203	3.28654	6.95297e-05	2.4072	0.000358971	chr1.125779991.125780879	2.33373	0.000648488	1.83182	0.00101208
chr1.149441381.149442138	2.12725	0.00336364	2.26306	0.0026559	chr11.5614375.5614885	2.18769	0.00804376	2.19069	0.00248445	chr1.125792978.125793777	2.60725	4.19731e-07	2.5868	2.32631e-15
chr1.149475684.149476237	2.5458	0.00135229	2.0322	0.00918485	chr11.7857641.7858420	2.54271	0.000193034	1.52407	0.0018387	chr1.125839696.125840608	2.45214	1.3929e-06	1.33719	4.64521e-05
chr1.149658776.149659477	2.39412	0.000740345	3.0046	6.65408e-05	chr11.8208910.8209945	2.51884	2.8364e-05	1.74255	6.2606e-05	chr1.125872151.125873109	2.6605	2.34913e-06	2.50968	4.13002e-09
chr1.149739923.149740574	2.47665	8.1517e-05	3.29762	3.95183e-06	chr11.8825385.8826751	1.69921	0.00494835	1.54003	0.000337547	chr1.125882588.125883190	2.33313	0.000340197	2.09689	5.72063e-05
chr1.149856560.149857393	1.91289	0.000200285	1.43325	0.00292642	chr11.9024180.9025281	2.06248	0.00226165	1.88414	0.000317103	chr1.125933836.125934776	2.51727	0.000196123	2.12555	7.67741e-05
chr1.149861933.149862621	1.82934	0.00249928	2.36973	0.000132282	chr11.9383304.9384098	2.10673	0.00144493	1.70435	0.00136023	chr1.125984849.125985600	2.42252	0.00173796	1.99891	0.00180524
chr1.149865947.149866619	2.61029	3.4771e-05	3.06932	2.75719e-06	chr11.9701081.9701693	1.80139	0.00489932	1.96755	0.00012623	chr1.126017610.126018423	1.90642	0.00329372	1.9668	0.000201225
chr1.149867161.149867989	2.0606	0.000520629	2.83867	3.83597e-06	chr11.10896923.10898012	2.19405	0.00103048	1.93855	0.000346021	chr1.126022974.126023520	2.05691	0.0078916	1.71921	0.00766472
chr1.151074407.151074821	2.62542	0.000429391	2.52793	0.0008071	chr11.10919998.10920878	1.83765	0.00279221	2.10271	1.60028e-05	chr1.126044485.126045040	3.06275	1.59269e-06	2.20693	4.82776e-06
chr1.151082573.151083192	2.59875	0.000868295	3.06441	0.000228099	chr11.11013577.11015013	2.04043	5.61439e-05	1.2243	4.1215e-05	chr1.126049135.126050110	2.89678	6.80162e-08	2.628	1.94906e-12
chr1.151111012.151112047	1.59637	0.0060196	2.48701	3.50296e-05	chr11.11101756.11103010	1.64581	0.0040146	3.00057	4.15429e-10	chr1.126109720.126110825	2.30738	2.50767e-05	2.1076	8.81788e-07
chr1.151526647.151527207	2.99021	1.55253e-05	2.88761	2.91539e-05	chr11.11676000.11677700	2.20324	7.26583e-05	2.1053	1.31883e-07	chr1.126247327.126248698	2.85821	2.05496e-07	1.13233	0.0020347
chr1.151947035.151948034	1.78244	0.00547265	1.96566	0.00197793	chr11.11965573.11966524	2.48029	4.42064e-05	2.00429	1.60001e-05	chr1.126359463.126360733	3.56735	1.49345e-11	2.06963	5.62831e-11
chr1.152394071.152394749	3.52855	4.45966e-06	3.67151	2.40801e-06	chr11.11996744.11997617	1.54529	0.00990804	3.37393	3.97429e-17	chr1.126492056.126493174	1.92577	0.000191816	1.32307	0.000311065
chr1.152524035.152524594	1.63051	0.00697956	3.13281	8.50344e-07	chr11.12701757.12702975	2.01613	0.00165384	1.4749	0.00308234	chr1.126543178.126543959	1.96209	0.00391647	1.54689	0.00496807
chr1.153180144.153181250	1.80908	0.00188755	2.7641	3.50074e-06	chr11.16534684.16535389	2.20828	0.00189165	1.65185	0.00391855	chr1.126858201.126859169	3.02978	1.88329e-07	1.14744	0.00385582
chr1.153201326.153202425	1.77858	0.00758086	2.25394	0.000746148	chr11.16782521.16783007	1.87807	0.00747195	2.2684	0.000113059	chr1.126931740.126932448	1.79844	0.000392351	1.51686	1.7322e-06
chr1.153940921.153941519	1.7221	0.00583789	2.59392	7.43951e-05	chr11.17215511.17215874	1.97648	0.00189265	2.24918	5.56699e-05	chr1.126932645.126933167	3.97647	6.12496e-08	3.00049	2.79428e-08
chr1.154188129.154189266	2.11252	0.000290404	2.02868	0.00101448	chr11.17663612.17664470	2.0854	0.00114414	2.26243	1.45405e-05	chr1.126948343.126949336	3.43105	3.96587e-12	3.28202	1.23812e-20
chr1.155214876.155215718	2.04113	0.00155495	1.92368	0.00271203	chr11.18026073.18026904	2.66313	0.000280005	1.94243	0.00101208	chr1.127001160.127001969	1.93542	0.00286696	1.61603	0.00318727
chr1.156765188.156765745	2.57552	0.000320306	3.60486	1.35466e-05	chr11.18275621.18276355	3.34802	1.33637e-06	3.14427	2.55844e-08	chr1.127098807.127099806	3.26535	3.90127e-07	1.57839	0.000413469
chr1.157168801.157170166	1.60995	0.00338238	2.79588	4.34796e-07	chr11.18323802.18324640	2.42049	0.000444765	2.05508	0.000280621	chr1.127261967.127262810	1.87395	0.000195833	1.69821	1.08243e-06
chr1.157483999.157484735	1.96481	0.000648936	2.53958	9.97243e-06	chr11.18753835.18755123	2.58616	4.45578e-06	2.31223	9.35524e-09	chr1.127579251.127579990	3.18839	1.10842e-08	1.98662	2.65118e-07
chr1.157555320.157556162	2.01514	0.00544708	2.15661	0.00177246	chr11.18892458.18892899	2.14574	0.00694773	2.49916	0.00039428	chr1.128063784.128064663	2.45871	1.98183e-05	2.49772	7.10074e-08
chr1.157669405.157670209	2.6065	1.16106e-05	2.91504	1.04115e-06	chr11.19438343.19438727	2.5668	0.00105767	2.14066	0.000923643	chr1.128197990.128198765	1.86766	0.00368502	2.65934	1.35173e-06
chr1.158327932.158328925	1.90343	0.00142668	1.64621	0.0042655	chr11.20395828.20396700	2.64678	6.96162e-05	1.37288	0.00640665	chr1.128619958.128620444	2.99485	2.17527e-05	1.4312	0.00918427
chr1.158512629.158513167	1.97329	0.00554037	2.26212	0.00177512	chr11.21272402.21273123	1.84569	0.00209395	1.51154	0.000547993	chr1.128756742.128757446	3.45706	8.03115e-08	2.74668	1.86598e-08
chr1.159198385.159198996	1.76177	0.00898094	2.91209	0.000117096	chr11.22863620.22863978	2.37085	0.00033338	3.01141	9.27419e-09	chr1.129432562.129433542	2.60737	4.68111e-05	2.07574	4.15077e-05
chr1.159398569.159399411	2.00606	0.000726618	2.52081	2.18626e-05	chr11.22886901.22887828	1.93943	0.00224025	1.48499	0.00204815	chr1.130734372.130735104	1.97388	0.00694588	1.84913	0.00247448
chr1.159716881.159717641	2.33993	0.000291929	2.84544	1.54842e-05	chr11.22892576.22893546	1.82467	0.0031429	1.52889	0.000841453	chr1.130840543.130841423	2.27093	0.00107658	1.64871	0.00354663
chr1.159771405.159771841	1.88438	0.00661587	2.68237	0.000102565	chr11.22936151.22937254	1.49632	0.00230258	1.24722	1.08236e-05	chr1.131112560.131113344	2.60523	3.22853e-05	1.97183	3.33538e-05
chr1.160799809.160800552	2.05623	0.00118294	3.46122	8.03106e-07	chr11.24244334.24245031	3.00115	4.24995e-06	2.07202	2.47875e-05	chr1.132279514.132280111	2.86982	0.000592759	2.10581	0.00263513
chr1.160864864.160865295	2.73769	0.000182937	3.21041	6.09171e-05	chr11.25336036.25336929	3.22652	1.2992e-06	2.01312	3.81987e-05	chr1.132307295.132308030	1.8495	0.0061517	2.23232	0.000149187
chr1.161491631.161492363	2.14861	0.00386677	3.00482	5.58105e-05	chr11.26084569.26085202	2.26565	0.00254483	1.9943	0.00158929	chr1.132319266.132319768	2.12102	0.00211483	1.84977	0.00122141
chr1.161505849.161506783	2.65148	1.22926e-05	3.10222	5.58297e-07	chr11.26667155.26667658	2.63339	8.05702e-05	2.61889	8.4391e-07	chr1.132324380.132324973	2.38595	0.00233938	2.18477	0.000607582
chr1.161621138.161622143	2.11212	0.000532588	2.48805	4.89766e-05	chr11.29770457.29771290	2.65467	9.77949e-05	1.99092	0.000434665	chr1.132639810.132641233	1.74271	0.00213856	1.09453	0.00926081
chr1.161939738.161940366	2.4081	0.00148738	2.15081	0.00417465	chr11.29810339.29810723	2.46987	0.000508522	2.24558	0.000178705	chr1.132641287.132641732	1.77882	0.00603718	1.55728	0.00354314
chr1.161957638.161958189	3.45129	3.29856e-05	2.59039	0.000899888	chr11.31464986.31465478	2.09686	0.0097198	2.482	0.000626487	chr1.132843907.132844554	1.62474	0.00645153	1.37984	0.00290663
chr1.162934234.162935048	2.66559	0.000100772	2.74513	0.000108181	chr11.31618867.31620076	2.0099	0.000670545	2.04639	5.70636e-06	chr1.132850768.132851257	3.63017	2.16153e-06	1.6505	0.00242856
chr1.163005231.163005905	1.86951	0.00541606	3.21148	8.90193e-06	chr11.33992576.33993707	1.59442	0.00538664	1.46246	0.000350791	chr1.132930164.132930644	2.87723	8.04094e-05	1.38587	0.00790671
chr1.163209075.163209933	2.16842	0.00124135	2.58671	0.000259081	chr11.34879509.34880247	2.16233	0.00988851	2.05154	0.00258564	chr1.133256233.133256704	2.05259	0.000820482	1.91397	9.49792e-05
chr1.163957700.163958645	1.69231	0.00317443	2.80285	1.71468e-06	chr11.36039740.36040770	3.59576	4.36965e-10	1.65009	3.5703e-06	chr1.133822792.133823611	2.00179	0.00647242	2.39882	0.000211577
chr1.164103943.164104685	2.34882	0.00174434	2.63437	0.000358674	chr11.36141788.36142675	2.34994	0.000127119	1.93188	2.59287e-05	chr1.133889221.133889853	2.98226	3.48929e-05	2.22153	5.15379e-05
chr1.164109330.164110310	2.12055	0.00280269	2.08055	0.0028763	chr11.36158041.36159078	1.94339	0.00173617	1.66945	0.000376624	chr1.135026559.135027106	2.92419	0.0010394	2.02796	0.00431025
chr1.164263345.164263941	2.58927	0.00021638	2.12173	0.00185323	chr11.36663531.36664260	2.11407	0.000443258	2.31358	1.05945e-07	chr1.135399517.135400245	2.11223	0.00093081	1.46479	0.00154199
chr1.164406589.164407646	2.10365	0.00305546	2.35412	0.00064675	chr11.37581772.37582994	2.16827	0.000354975	1.26013	0.00447697	chr1.135556343.135556965	3.10903	6.83443e-07	2.23791	3.18376e-07
chr1.165558521.165559592	2.53752	3.52942e-05	3.82042	1.46252e-09	chr11.38317185.38318256	2.04848	0.00514851	1.64184	0.00693231	chr1.135634029.135634934	1.95742	0.00096883	2.36611	1.29304e-07
chr1.165943275.165944115	1.8766	0.00261043	1.79015	0.00318076	chr11.38405872.38406930	2.06679	0.000884412	1.36	0.00359521	chr1.136442940.136443598	3.11813	5.24668e-05	2.59849	3.53631e-05
chr1.166038453.166039384	2.0765	0.00718019	2.03342	0.00730616	chr11.39003617.39004826	2.63012	1.18475e-05	2.20379	7.26071e-07	chr1.136848822.136849656	2.56153	0.00020934	2.04274	0.000219493
chr1.166259304.166259840	1.91087	0.00174792	1.76074	0.00406331	chr11.39570692.39571729	2.35972	0.0003608	1.84112	0.000391897	chr1.137182108.137183404	1.91438	0.00133099	1.36223	0.00418919
chr1.166266828.166267831	1.83996	0.00473727	1.92005	0.00257383	chr11.39657349.39658369	2.63436	4.58059e-05	2.47831	1.60156e-06	chr1.137487884.137488500	2.46753	0.000363649	1.54867	0.00446412
chr1.166298914.166299223	2.16775	0.00441325	2.59544	0.000633022	chr11.39709759.39710563	3.13815	1.24642e-06	2.55876	2.07816e-07	chr1.138042692.138043523	1.71641	0.00633493	1.71957	0.000633007
chr1.166429584.166430822	1.49839	0.00632458	1.46589	0.0044235	chr11.40365922.40367023	2.30863	0.000780072	1.55911	0.00525771	chr1.138079650.138080321	3.87066	6.86053e-08	2.89935	1.09154e-07
chr1.166923900.166924663	2.16208	0.00103032	1.9533	0.00257869	chr11.40447447.40448170	1.89988	0.00352356	2.78872	9.28572e-07	chr1.138204664.138205382	2.13171	0.00517033	2.81359	3.42005e-05
chr1.167643522.167643994	1.9615	0.00869602	1.97629	0.00753925	chr11.40499853.40500636	2.42369	0.000599595	2.19219	0.000215679	chr1.138446489.138447377	1.56447	0.00122294	1.32959	1.71523e-05
chr1.167780145.167780771	3.14562	6.56429e-05	1.95003	0.00786515	chr11.41934544.41935487	1.95682	0.00325596	1.4646	0.00371612	chr1.139289240.139290124	3.06561	8.59297e-07	1.98669	1.01696e-06
chr1.167945579.167946261	2.08227	0.000773437	2.47943	5.22734e-05	chr11.42641392.42642104	2.86007	1.03944e-05	2.86623	1.33867e-08	chr1.139371224.139371946	3.21276	1.53405e-06	1.7617	0.000248138
chr1.168061152.168062065	2.17211	0.000507619	2.49669	9.44523e-05	chr11.44196119.44197002	1.77102	0.00504419	1.68392	1.52723e-05	chr1.139391633.139392316	2.69213	0.000197121	2.26447	0.000122149
chr1.168308879.168309593	2.5348	8.52381e-05	1.85816	0.00193287	chr11.44854001.44855035	2.02651	0.000856056	1.8273	0.000104185	chr1.139487700.139488195	2.92207	0.000210639	2.78131	4.08355e-05
chr1.168950698.168951605	1.47264	0.00941762	2.38467	1.57049e-05	chr11.45766423.45767778	1.76293	0.00430251	1.7004	0.000365207	chr1.140370834.140371298	2.83125	0.000707085	2.44034	0.000468769
chr1.169155884.169156809	2.16373	0.00182365	2.9856	2.25138e-05	chr11.46031865.46033017	3.04128	1.04672e-07	1.24076	0.000218413	chr1.140389984.140390812	3.4982	3.06381e-08	1.61904	7.27529e-05
chr1.169346742.169347415	2.7573	4.69579e-05	2.13381	0.00100554	chr11.46685375.46686503	2.24208	0.000117935	1.15259	0.00465856	chr1.140525592.140526558	3.19616	1.76939e-06	2.31079	4.87607e-06
chr1.169858947.169859974	1.96331	0.00279852	2.17157	0.000761409	chr11.47418246.47418976	2.41607	0.00347517	2.15534	0.00253568	chr1.141045787.141046416	2.76523	0.000213015	2.02237	0.000660498
chr1.169868222.169869281	1.94561	0.000951018	1.95275	0.000515557	chr11.48430997.48431981	2.57385	4.07772e-05	2.1462	1.86545e-05	chr1.141108830.141109243	4.16183	1.31167e-06	1.93222	0.00126006
chr1.169878999.169879585	2.81659	3.29856e-05	3.42728	1.70091e-06	chr11.50492293.50493341	1.92887	0.000994678	1.64378	2.00198e-05	chr1.141145625.141146319	3.05048	1.14732e-05	2.0118	0.000141735
chr1.170083968.170085257	1.92649	0.00582326	2.4765	0.000465337	chr11.52286572.52287261	2.64553	0.00042071	2.49904	6.35148e-05	chr1.141284439.141285240	2.0669	0.00130006	2.16076	5.91924e-05
chr1.170186397.170187598	2.25356	1.70748e-05	1.69702	0.000659717	chr11.53252331.53253209	2.89388	1.43097e-05	1.64086	0.000842313	chr1.141465778.141466635	1.72898	0.00744593	1.65737	0.00140814
chr1.170188692.170188983	2.07491	0.00584871	2.75293	0.000380492	chr11.53347169.53347655	2.12792	0.00960283	2.22349	0.00173795	chr1.141576670.141577262	2.99349	0.000134412	2.73544	7.29161e-06
chr1.170412014.170412559	1.86703	0.00631668	1.73883	0.0087413	chr11.57552792.57553551	3.32567	6.71834e-06	2.13224	0.000148117	chr1.141775834.141776908	2.87829	2.26761e-05	1.62123	0.00146647
chr1.170507289.170507776	2.94883	4.94732e-05	3.101	5.7627e-06	chr11.61311623.61312123	2.91857	0.000181659	2.30797	0.000465639	chr1.141793918.141795268	1.87106	0.000162126	1.66793	6.06696e-07
chr1.170616722.170617318	3.29701	2.44299e-05	2.72109	0.000461777	chr11.63301468.63302012	2.33004	0.00750886	2.16131	0.0041511	chr1.141926238.141927329	2.35883	0.000104427	1.60465	0.000351939
chr1.170699544.170700264	1.84558	0.0069723	1.93442	0.00473248	chr11.64715019.64715769	2.7997	3.28586e-05	2.15896	4.51555e-05	chr1.142326697.142327659	2.39804	0.00011495	2.6223	4.12723e-07
chr1.171316631.171316953	2.43355	0.00735382	2.7238	0.00476697	chr11.66357255.66358322	2.27093	0.000147662	1.47001	0.000671837	chr1.142338663.142339146	3.23527	0.000384437	2.03687	0.00717419
chr1.171788174.171789397	2.43548	3.59522e-06	3.17251	1.84636e-09	chr11.66694539.66695566	3.18351	7.64899e-09	2.8058	3.20002e-13	chr1.142409215.142410031	2.68776	6.24403e-05	2.6613	5.04477e-07
chr1.171886740.171887787	1.68111	0.00390125	2.69782	8.30851e-06	chr11.66753745.66754406	2.07824	0.000506997	2.7248	1.21766e-08	chr1.142678289.142679416	3.04072	1.65517e-07	2.36128	8.1966e-08
chr1.172323879.172324426	1.47013	0.00744982	1.3622	0.00871558	chr11.68086244.68086719	2.2389	0.00633497	1.862	0.0089229	chr1.142730897.142731758	2.51066	0.000182713	1.67717	0.0011323
chr1.172331138.172331386	2.24596	0.00977056	2.67432	0.00383639	chr11.68453145.68453708	2.25648	0.00402874	1.7673	0.00819733	chr1.142838469.142839361	4.35227	1.04764e-14	3.472	5.24405e-20
chr1.172751055.172751895	1.87385	0.00826489	2.11477	0.00283779	chr11.77843848.77844367	2.44702	0.000614742	1.45824	0.008723	chr1.142956766.142957683	2.60527	6.47828e-06	1.73792	3.08596e-05
chr1.172840337.172841005	2.18013	0.00695086	2.70879	0.00158847	chr11.77860800.77861338	2.48007	0.000243806	1.81797	0.000406395	chr1.143019275.143020720	3.05844	5.58052e-09	2.47873	5.1981e-11
chr1.173032844.173033787	2.64124	1.50214e-05	2.73089	7.39424e-06	chr11.81307537.81308590	2.43018	0.000120409	2.6943	9.90991e-08	chr1.143308263.143309324	2.30153	3.17684e-05	1.99797	1.18523e-06
chr1.173973060.173973884	1.80217	0.00491859	2.72146	5.42014e-05	chr11.82534581.82535577	2.48509	0.000168486	1.87163	0.0002834	chr1.143348197.143349141	1.93782	0.00150315	1.92602	0.000201994
chr1.174597956.174598908	1.81287	0.00142101	2.18449	2.64082e-05	chr11.83465762.83466357	2.56002	0.000734994	2.46121	1.99999e-05	chr1.143355803.143356458	2.52902	0.00157994	1.98491	0.00288322
chr1.175069767.175070570	1.89746	0.0028242	2.45215	0.000162874	chr11.83513233.83513936	1.90417	0.00850874	2.60746	5.35288e-05	chr1.143855437.143856392	1.80757	0.00868892	1.48801	0.00299904
chr1.175074915.175075563	2.27383	0.00202228	2.16105	0.00186711	chr11.84637172.84637802	2.60125	0.00010266	1.38814	0.00588271	chr1.143919010.143920846	1.52971	0.00261073	1.17554	0.000121744
chr1.175142899.175143767	1.79537	0.00206387	2.66873	8.8284e-06	chr11.85487301.85487870	2.65813	0.000844409	1.94572	0.00327704	chr1.144118855.144120700	1.48146	0.00750923	1.08086	0.00781393
chr1.175185172.175185957	1.75347	0.00873034	2.07062	0.00199312	chr11.88378572.88379163	3.08244	4.18002e-05	1.62232	0.0059919	chr1.145064786.145065947	2.01859	0.00666416	1.56281	0.00620506
chr1.176443633.176444073	2.89642	0.000227558	2.87012	0.000468185	chr11.90355098.90356038	1.77966	0.00249115	1.8441	3.74244e-05	chr1.145772933.145773658	3.80324	2.79448e-08	2.65709	3.12673e-07
chr1.176851271.176851791	3.66829	1.03109e-05	3.4309	4.83299e-05	chr11.90518137.90518983	1.61821	0.00704173	2.91161	8.34183e-09	chr1.146435789.146436402	3.15181	4.30774e-05	1.6771	0.00406147
chr1.176926964.176927726	2.49045	8.73941e-06	2.76916	4.1987e-07	chr11.90527705.90528623	1.8534	0.00859916	1.70574	0.00346985	chr1.147648545.147649307	1.6493	0.00506408	2.52027	2.58282e-07
chr1.176933320.176933885	2.06437	0.0055069	2.52637	0.00105057	chr11.91430658.91431235	1.92038	0.0081175	2.09447	0.000493522	chr1.148651832.148652494	3.3705	6.8271e-07	1.9212	8.50357e-05
chr1.176939829.176940553	1.88721	0.00518709	2.56601	0.000268759	chr11.91737164.91738151	1.76361	0.00648377	2.38809	4.36913e-06	chr1.150800577.150801472	3.27261	6.44895e-07	1.84775	7.83417e-05
chr1.176980119.176981312	1.86578	0.00309053	3.38522	3.24574e-07	chr11.92353687.92354614	2.47157	5.3728e-05	1.31559	0.00245154	chr1.151657907.151658969	1.85576	0.00055165	1.39772	0.000357967
chr1.177379420.177380024	2.60226	0.000615312	2.51442	0.000703883	chr11.97070364.97071519	1.57107	0.00485995	2.22252	7.41232e-08	chr1.151712560.151713030	2.11893	0.00207039	1.76799	0.00143025
chr1.177572900.177574587	1.5992	0.00431798	1.95239	0.000466184	chr11.98347484.98349063	1.53138	0.0053112	1.34359	0.000106598	chr1.152041932.152042343	2.17593	0.00331544	1.71317	0.00410089
chr1.178431330.178432054	1.62372	0.00871825	3.17978	2.01912e-06	chr11.98950697.98952026	2.18396	0.000575151	1.60703	0.000418727	chr1.152163246.152163627	2.17168	0.00653909	1.9687	0.00337514
chr1.178836914.178837849	2.59911	7.07202e-05	2.44988	0.000224425	chr11.99506820.99507898	2.29046	0.000475613	2.25869	4.58835e-07	chr1.152287580.152288559	2.36016	2.15396e-05	1.09124	0.00513603
chr1.179814423.179815118	1.8922	0.00280192	3.88166	1.22446e-07	chr11.101957500.101958238	2.29791	0.00283294	2.58177	5.74794e-05	chr1.152389235.152389663	2.36666	8.77844e-06	1.46521	4.35216e-05
chr1.180549713.180550073	2.23371	0.00723946	2.90374	0.00243288	chr11.105837608.105838670	1.52678	0.00862771	1.62216	0.000127256	chr1.152526211.152526981	1.81756	0.00156658	2.2917	1.10261e-06
chr1.181221918.181222502	2.29925	0.00182654	3.4719	1.35406e-05	chr11.107250840.107251500	2.98697	2.99793e-05	1.69766	0.00163834	chr1.153039961.153040655	1.56898	0.00430453	1.20127	0.00299402
chr1.181285276.181286173	2.52714	0.00093279	2.22438	0.00127712	chr11.107322378.107323135	1.91911	0.00739784	1.9131	0.00140829	chr1.153043313.153043884	1.91281	0.00448246	1.7957	0.0010523
chr1.181419571.181420512	2.04278	0.00157735	1.90139	0.00294067	chr11.107704389.107705911	1.75735	0.00336627	1.53436	0.000545216	chr1.153073211.153073793	2.89182	1.46885e-06	1.47201	0.00023097
chr1.182235034.182235324	2.80666	0.00282319	3.38052	0.00115068	chr11.109270661.109271214	2.72812	5.2339e-05	2.04153	0.000206306	chr1.153075126.153075572	2.7718	8.90508e-06	2.21431	3.42531e-06
chr1.182345873.182346228	2.99711	0.000285798	2.78325	0.000825479	chr11.109289270.109289588	2.64464	0.00196337	1.98384	0.00620133	chr1.153567736.153568517	2.81955	2.8887e-06	2.35725	3.3587e-07
chr1.183151296.183152208	1.47534	0.00898263	2.34643	1.64404e-05	chr11.109290835.109291200	2.82916	0.000439164	3.0353	1.6476e-05	chr1.153658333.153658578	3.60722	2.40218e-05	1.82506	0.00240938
chr1.184530356.184531307	1.76644	0.00412302	2.37492	0.000130493	chr11.109292135.109292488	2.79626	0.000237519	2.36667	0.000184451	chr1.153691573.153692178	4.62328	2.39678e-12	1.90573	7.41101e-07
chr1.184695196.184695922	2.50795	9.8189e-05	2.60305	5.87586e-05	chr11.109307366.109308198	2.33392	0.00162426	1.82259	0.00271336	chr1.153697141.153698715	1.90139	0.000259752	1.27658	0.000481224
chr1.185315943.185316794	3.11857	1.65616e-05	3.17325	1.24599e-05	chr11.111255926.111256861	2.30132	8.85117e-05	2.62822	8.30977e-09	chr1.154423330.154423752	2.8743	0.00221617	1.95734	0.00915196
chr1.185726274.185726851	2.59279	0.000634161	2.18593	0.00361019	chr11.112926329.112927713	2.33359	0.000181659	1.21429	0.00844753	chr1.154706748.154707468	1.9255	0.00418733	1.65441	0.00292936
chr1.185846993.185847947	2.1677	0.000497644	2.49179	7.64762e-05	chr11.114178779.114179423	1.67378	0.00587629	1.22728	0.00671879	chr1.155516432.155517643	2.63779	3.03391e-06	1.44606	0.000338273
chr1.185869847.185870699	2.04569	0.00332181	2.0175	0.00308103	chr11.114486331.114487118	1.94961	0.00207639	2.03689	0.00011541	chr1.155710904.155711777	2.50644	8.23767e-05	2.1384	1.4126e-05
chr1.186249161.186249812	2.43935	0.000297239	2.08074	0.00148682	chr11.115128396.115128903	3.11271	0.000245008	1.85145	0.00809319	chr1.156201096.156201409	3.06576	0.000386473	2.18698	0.00139455
chr1.187118997.187119896	2.95664	1.25166e-06	2.86839	1.16817e-06	chr11.116869242.116869981	2.2043	0.00633068	2.47265	0.000684869	chr1.156269910.156270878	2.15079	8.49395e-05	2.79657	1.90792e-10
chr1.187125042.187126544	2.50607	8.6072e-06	2.71553	7.42804e-07	chr11.119144661.119145534	1.79509	0.0048876	1.65771	0.0015533	chr1.157054752.157056173	2.71763	2.3407e-07	1.80298	6.30243e-07
chr1.187230224.187231186	1.59681	0.00763837	2.00801	0.000487612	chr11.119181158.119181573	2.28324	0.00618978	1.84211	0.00921673	chr1.157282096.157282598	2.66451	0.000213883	2.20573	0.000166914
chr1.187561501.187562423	2.08062	0.00759216	2.30158	0.00237896	chr12.3917389.3918171	1.86768	0.00200257	1.40235	0.00186463	chr1.157766015.157766604	3.75294	7.62535e-06	2.19106	0.000200072
chr1.188220925.188221929	1.89504	0.00166215	2.01083	0.000517614	chr12.4813716.4813995	2.10848	0.0083362	2.41205	0.000664463	chr1.158080070.158080729	2.73983	0.000469253	1.93487	0.00261163
chr1.188232970.188233763	1.95933	0.00513346	3.29505	5.25978e-06	chr12.5117142.5117650	2.45306	5.0396e-05	2.01264	1.15684e-05	chr1.158090180.158091038	3.25985	3.99178e-06	1.95743	6.45817e-05
chr1.188260509.188261324	1.95404	0.00428252	1.84992	0.00525344	chr12.5428488.5429389	2.54571	7.66434e-06	2.32014	1.49392e-08	chr1.158169963.158170664	2.65581	5.75873e-05	2.03498	8.24262e-05
chr1.188312919.188314041	2.80486	5.60404e-06	3.21326	4.16329e-07	chr12.5442618.5443128	1.98785	0.00646963	1.76493	0.00385286	chr1.158229235.158229982	2.851	6.54433e-06	2.59719	2.83813e-07
chr1.188420246.188421066	1.8945	0.00532214	2.38103	0.000650324	chr12.5753763.5754569	1.74574	0.00219914	1.97272	4.28921e-06	chr1.158614634.158615501	3.18933	1.61084e-07	2.38043	1.06028e-06
chr1.188463800.188464436	3.34191	1.22771e-05	2.70405	0.000253128	chr12.7521282.7522276	1.6415	0.00407764	1.2868	7.32472e-06	chr1.159148472.159149213	3.37847	6.24056e-07	1.40418	0.00325294
chr1.188568186.188569022	2.24905	0.000275114	2.16077	0.000363175	chr12.8147021.8147826	2.71912	0.000531811	2.0119	0.00224027	chr1.159569983.159571208	1.82117	0.000903189	1.75378	7.77301e-06
chr1.188777313.188778138	2.10701	0.00260468	2.88412	7.97442e-05	chr12.8216482.8217289	1.77519	0.00168032	1.42928	0.000436337	chr1.159865271.159866194	2.88119	7.59258e-06	1.81735	0.000122155
chr1.189004822.189005250	2.70882	4.58997e-05	2.55256	8.05429e-05	chr12.8472563.8473218	2.17932	0.00109922	2.45815	1.06524e-05	chr1.159870248.159870927	3.25834	7.57211e-06	2.14451	0.00021461
chr1.189039269.189039895	1.91629	0.00862771	2.7158	0.000455633	chr12.10007837.10009325	2.04359	0.000296174	2.54702	4.14309e-09	chr1.160430673.160431663	2.19796	0.0016187	1.92352	0.000788831
chr1.189048127.189049100	2.04327	0.00267409	2.14898	0.00161526	chr12.11083845.11084493	1.74456	0.00550066	2.79235	5.63194e-08	chr1.160683154.160683709	2.66144	0.0012863	2.91885	2.99526e-05
chr1.189532460.189533563	1.44459	0.00824248	2.7287	7.92037e-07	chr12.11357624.11358163	2.06952	0.00311254	1.61711	0.00445615	chr1.161389414.161389988	1.92474	0.00689626	1.99579	0.000892043
chr1.190883760.190884258	2.28544	0.00309053	2.14056	0.00635132	chr12.11687679.11688530	1.96157	0.00139969	2.56653	6.49519e-07	chr1.161550833.161551662	3.45418	1.75623e-09	2.4233	1.41605e-09
chr1.191093298.191094007	1.89111	0.00607552	2.74277	8.2953e-05	chr12.12125351.12126189	2.17544	0.00175568	1.66621	0.00126198	chr1.162298428.162299081	3.47231	9.66321e-06	1.73712	0.00289839
chr1.191610336.191610970	2.24449	0.00518773	2.15113	0.00802689	chr12.13027951.13028492	1.75615	0.00389817	1.5039	0.000463489	chr1.162420623.162421231	2.98502	4.67096e-05	2.09866	0.000249434
chr1.191796314.191797077	2.36011	0.00142305	2.98796	2.54361e-05	chr12.13120234.13121440	1.73941	0.00416221	1.85569	7.30731e-05	chr1.162746099.162747165	1.78133	0.0021887	1.51081	0.000763807
chr1.191859698.191860199	2.38394	0.00316013	3.38925	0.000112223	chr12.13723877.13724846	2.51307	7.57851e-05	2.10463	2.4622e-06	chr1.162905095.162905673	2.63731	0.000750172	2.29352	0.000660498
chr1.193047546.193048083	2.43723	0.0030807	2.23973	0.00702923	chr12.15674791.15675565	2.08239	0.00418829	3.22092	2.85641e-06	chr1.163311778.163312707	1.69202	0.000888708	1.21161	0.000311485
chr1.193647766.193648833	2.35241	0.000385107	2.19674	0.000667667	chr12.17048946.17049341	2.96483	0.000624873	1.93201	0.00665989	chr1.163383475.163384239	2.05363	0.000377381	1.66726	0.000138234
chr1.193930928.193931835	2.79047	1.64776e-05	2.72956	1.15808e-05	chr12.21284053.21284712	3.1073	5.67244e-05	2.28189	0.00025073	chr1.163554265.163555014	2.81146	1.72039e-05	1.98803	6.85105e-05
chr1.194049448.194050519	2.16356	8.5509e-05	2.12015	1.44738e-05	chr12.24699544.24700067	2.62523	0.00119281	2.04884	0.00139277	chr1.163660825.163661922	2.28501	0.000212695	1.72013	0.0009675
chr1.194052789.194053107	2.39756	0.00482114	2.75051	0.00236494	chr12.25865020.25865619	2.64747	0.000538349	3.09947	7.75779e-06	chr1.163667367.163668252	3.74401	7.16955e-08	2.04139	3.04115e-05
chr1.194881611.194881822	3.22782	0.000227558	2.88945	0.00121158	chr12.29944296.29945394	1.83123	0.00245836	1.45101	0.0011577	chr1.163816827.163817697	1.76947	0.004886	1.87002	0.000397128
chr1.194885099.194886475	1.83132	0.00063775	1.96776	0.000157628	chr12.30331678.30332447	2.8528	0.000110126	1.58825	0.00603419	chr1.164897162.164897566	3.01961	2.14217e-08	1.44157	4.83291e-05
chr10.3513868.3514375	2.98194	0.000729726	2.42024	0.00593753	chr12.31191259.31192250	1.99184	0.000393009	2.79234	1.14825e-15	chr1.165373504.165374467	2.3714	4.21907e-06	1.26215	0.000134422
chr10.4112809.4113832	2.25601	0.000997326	3.42351	6.23047e-06	chr12.31302024.31302262	2.44208	0.00508213	1.98378	0.00886629	chr1.165934551.165935992	2.20468	1.36802e-06	1.33843	8.93328e-08
chr10.4924185.4925286	2.2628	0.00391387	2.13678	0.00695815	chr12.31302906.31303935	1.52023	0.00971175	1.59636	0.00020298	chr1.166078801.166079539	2.4986	0.000800063	2.5552	2.63738e-05
chr10.5068398.5069330	1.78657	0.00596557	1.92206	0.00291481	chr12.31305879.31306658	1.98641	0.00217586	1.74145	0.00115421	chr1.166866038.166866931	3.35594	2.59359e-09	2.51337	4.9805e-10
chr10.5182725.5183132	2.06545	0.00570379	2.4338	0.00168113	chr12.31469296.31470137	2.04021	0.00345566	2.13125	0.0003264	chr1.166909760.166910997	2.82615	4.95582e-07	2.58957	4.11361e-09
chr10.5378797.5379753	2.05544	0.000215028	3.14818	1.23099e-08	chr12.31880252.31880779	2.3357	0.00438258	2.13188	0.00314663	chr1.167031732.167032795	1.72564	0.00187938	1.66838	9.0882e-05
chr10.5437753.5438547	2.25122	0.00296556	2.54362	0.00171142	chr12.32158571.32159326	3.00046	2.18475e-06	1.54128	0.000439355	chr1.167068054.167068322	2.47392	0.000642811	2.26841	0.000429715
chr10.5445289.5445737	2.16395	0.00377019	2.63344	0.000781829	chr12.32632651.32633769	2.37555	0.000236779	1.86086	0.00021461	chr1.168139788.168140590	1.88641	0.00258048	1.73356	0.000555633
chr10.6296235.6297146	1.9712	0.00492429	3.57971	4.72271e-06	chr12.33731828.33732722	2.93849	8.54417e-07	1.05989	0.00646685	chr1.168141342.168141962	2.75683	1.09431e-05	2.55773	1.017e-07
chr10.6309194.6310102	2.65663	0.000231064	3.33504	3.56692e-06	chr12.35324348.35325269	3.1833	1.06658e-05	2.05589	0.000273183	chr1.168275406.168276349	3.39175	5.53358e-12	1.38572	1.49156e-06
chr10.6900002.6900635	1.90579	0.00902156	2.58839	0.000581004	chr12.35403640.35404398	1.68754	0.00873831	1.7257	0.000741707	chr1.168487413.168488152	3.38742	1.93335e-05	2.07487	0.000529061
chr10.6909672.6910236	2.07519	0.00673785	2.09469	0.00705631	chr12.36385958.36386366	2.85115	4.90704e-05	1.90586	0.000473429	chr1.168681477.168682395	2.67295	1.47074e-05	1.15969	0.00918324
chr10.6930459.6931430	2.36025	0.000713772	2.77236	0.000108817	chr12.36479138.36479964	2.97278	1.22771e-05	1.98991	0.000105621	chr1.168818422.168818790	3.21756	0.000181702	2.09032	0.00154766
chr10.6936589.6937274	1.85154	0.0021624	2.60589	1.43855e-05	chr12.36831136.36832151	1.73297	0.00619317	1.90606	0.000156797	chr1.168833236.168833847	2.21996	0.00422593	1.78474	0.00633308
chr10.7870570.7871255	1.80963	0.00595517	1.71972	0.00770533	chr12.37498546.37499280	1.87407	0.00450873	2.09959	5.40646e-05	chr1.169096524.169097319	1.80853	0.00769557	1.54177	0.00728724
chr10.8736328.8737101	1.97619	0.00590728	2.11397	0.0036978	chr12.37637488.37638604	2.07636	0.000401471	2.86748	1.62727e-09	chr1.169243503.169244304	3.01962	1.09557e-05	2.79004	3.45874e-07
chr10.9113401.9114170	1.93819	0.00172154	2.00475	0.00117518	chr12.37889093.37889984	2.46945	5.18616e-06	1.36967	7.47124e-05	chr1.169251960.169252716	2.65937	5.91791e-05	2.25277	1.58607e-05
chr10.9202830.9204005	1.78043	0.00167081	2.42585	1.67739e-05	chr12.38090835.38091863	2.26958	0.000150994	2.08338	4.15008e-06	chr1.169281410.169282371	2.92967	1.62443e-06	2.05254	4.86162e-06
chr10.9586129.9586974	1.49038	0.00670158	2.47194	4.73023e-06	chr12.38118086.38118739	2.93458	9.41507e-05	2.76608	1.17243e-05	chr1.169311615.169312269	3.4939	3.12422e-08	3.12158	8.13239e-11
chr10.10110981.10111458	1.94135	0.00441325	2.12806	0.00310389	chr12.38759300.38759708	2.74127	0.0015534	2.38573	0.0016613	chr1.169313088.169313798	2.29437	0.000591382	1.7035	3.746e-05
chr10.10323002.10323330	2.01296	0.00589804	2.84275	0.000207244	chr12.38862258.38862930	2.32644	0.000590233	1.76951	0.000738899	chr1.169607887.169608851	3.47735	8.45262e-07	2.62652	1.34199e-06
chr10.10325460.10325992	1.88618	0.00114676	2.92613	1.3468e-06	chr12.38971004.38971762	2.17303	0.000209561	2.98826	4.57696e-11	chr1.169678527.169678934	3.01188	9.06257e-05	2.13616	0.000505085
chr10.10747616.10748441	1.86159	0.00952371	2.33627	0.00179062	chr12.39728697.39729808	1.72431	0.00537106	2.01043	3.82153e-05	chr1.169702950.169704107	1.88215	0.00155456	1.306	0.00372427
chr10.10946479.10946749	2.77269	0.000456598	2.23422	0.00300897	chr12.40390944.40391753	2.16178	0.00159836	1.67396	0.00515479	chr1.169726812.169727478	2.07337	0.00186702	2.30949	3.5869e-05
chr10.11128844.11129902	2.09829	0.00103295	2.0399	0.00117317	chr12.40796711.40797042	2.06494	0.00797471	1.99384	0.00239392	chr1.169776383.169777180	3.49268	8.50344e-07	1.38792	0.0041562
chr10.11323382.11324046	2.2591	0.000859656	2.02954	0.00252016	chr12.41012853.41013710	2.69929	9.14029e-05	1.42669	0.00598956	chr1.169849509.169850089	2.57292	0.000135455	1.75118	0.00123813
chr10.11452472.11452964	1.8324	0.00266857	2.4174	7.92915e-05	chr12.41319386.41320112	1.96774	0.00579213	1.56728	0.0070304	chr1.169855250.169856098	3.09652	6.6378e-06	2.06578	5.31758e-05
chr10.11659784.11660817	2.47896	7.90805e-05	2.75028	1.44188e-05	chr12.41415890.41417087	1.8074	0.00278138	2.93468	4.55242e-11	chr1.169889407.169890189	2.22024	0.00045161	1.35494	0.00539883
chr10.11730573.11731598	2.61671	2.24646e-05	2.47865	5.0012e-05	chr12.41658402.41659559	3.70364	2.48258e-09	2.16406	2.63044e-07	chr1.170325571.170326618	1.61592	0.00520845	1.20831	0.00686361
chr10.11922004.11923092	1.8769	0.00588234	2.47744	0.000265964	chr12.41834634.41834996	2.16041	0.0053996	2.29405	0.00101364	chr1.170436369.170436907	2.06471	0.00783365	1.85794	0.00183487
chr10.12302136.12303077	1.68838	0.00384162	1.7988	0.00147327	chr12.43280112.43281151	2.24225	0.000901218	1.35231	0.00961758	chr1.170510430.170511125	2.05598	9.21234e-05	2.10341	3.17026e-08
chr10.12440101.12441240	1.8106	0.00403799	1.76429	0.00542237	chr12.43952663.43953560	3.44662	1.21162e-06	1.85462	0.00030465	chr1.171424903.171425777	2.5946	3.53929e-05	1.47302	0.000656739
chr10.12445618.12446341	2.15231	0.000872918	2.66461	1.37686e-05	chr12.44089854.44090568	1.62079	0.00981811	2.0941	3.20903e-05	chr1.171437024.171438136	2.61884	7.37124e-08	1.62492	2.56114e-07
chr10.13453135.13453823	2.19075	0.0048449	2.52905	0.00129867	chr12.49886910.49887874	1.59288	0.00264797	1.92278	2.67014e-09	chr1.171634564.171635464	1.6073	0.00254857	1.09642	0.00387416
chr10.13587428.13588575	1.732	0.000468486	3.19664	7.96271e-11	chr12.50196132.50196931	1.97542	0.00255954	1.28398	0.00795434	chr1.172186066.172186723	2.35976	0.000314143	1.51795	0.00273246
chr10.14296065.14296566	2.21454	0.00883902	2.86123	0.00145984	chr12.50551489.50551950	2.40416	0.00139265	1.63536	0.00527612	chr1.172786644.172787390	3.22898	5.5626e-06	2.35472	1.32906e-05
chr10.14592153.14592743	2.48983	0.000456652	3.45612	6.54433e-06	chr12.50557293.50558141	2.13488	0.00110834	1.40056	0.00576833	chr1.174607824.174609167	1.46434	0.0042264	2.01233	5.94768e-10
chr10.14596544.14596989	2.17159	0.00334858	2.04368	0.00621993	chr12.50958800.50959688	3.07639	3.66004e-07	1.99866	2.09958e-06	chr1.174614963.174615564	2.99474	7.94346e-05	2.61889	1.97194e-05
chr10.14844762.14845501	2.1655	0.000297247	2.42338	3.59783e-05	chr12.51039273.51040175	1.77403	0.0032025	1.46688	0.00102377	chr1.175272493.175273395	3.19247	4.84121e-08	2.57158	1.48255e-10
chr10.15805633.15806159	2.85792	3.34003e-05	2.84699	4.52725e-05	chr12.52389389.52390755	2.46842	2.83478e-06	2.39791	5.00069e-11	chr1.175450916.175451785	1.70096	0.00449237	1.21099	0.00613069
chr10.15807121.15807907	2.30847	0.000320844	4.24521	1.26995e-07	chr12.52410282.52410962	1.97633	0.00564302	2.34923	0.000178033	chr1.175541173.175541612	3.46157	2.71695e-06	2.22531	0.000100414
chr10.15867857.15868712	1.73311	0.00675234	1.9978	0.00196268	chr12.54857864.54858431	3.33817	1.53681e-06	2.04717	9.15585e-05	chr1.176368237.176369034	3.05765	6.41201e-05	1.88779	0.00133232
chr10.17562545.17563774	1.75773	0.00293978	2.02185	0.000219714	chr12.55974123.55974775	3.76635	8.94281e-08	2.18471	3.84877e-06	chr1.176375795.176376489	2.64873	2.94033e-05	2.47895	8.16725e-07
chr10.17564845.17565554	2.39347	0.000275114	3.23633	4.4704e-06	chr12.56229852.56230804	1.7607	0.00956806	1.91793	0.00041078	chr1.176528733.176529352	2.58469	0.000461879	1.80728	0.00467596
chr10.17841892.17842480	2.13501	0.000141958	3.14572	7.50027e-08	chr12.56436730.56437356	2.20102	0.000322029	1.94452	3.1678e-05	chr1.176603250.176604367	2.66809	1.37218e-05	2.39239	4.06255e-07
chr10.18478280.18478830	2.1927	0.00189108	2.17366	0.00204043	chr12.56440923.56441729	2.55507	0.000128555	1.44826	0.00412262	chr1.176612948.176613691	2.58939	0.000341145	2.5161	4.12438e-05
chr10.18480676.18481204	2.08518	0.00598037	2.21577	0.00436444	chr12.56470622.56472070	2.39976	2.18573e-05	1.06361	0.00642188	chr1.176690020.176690815	3.09861	1.65518e-05	2.54308	6.34071e-06
chr10.18593554.18594020	2.81751	0.000999173	2.38437	0.00439731	chr12.57861109.57862175	1.57708	0.00658093	1.71763	6.0916e-05	chr1.177335304.177335840	3.4146	1.68921e-05	2.21409	0.000515769
chr10.18660645.18661353	1.97691	0.00684983	1.86527	0.00928574	chr12.58817655.58818042	2.72792	0.000391267	1.73402	0.00511021	chr1.178568453.178569111	2.3813	0.00282116	1.83817	0.00738478
chr10.18821884.18822417	2.30458	0.00184788	3.25385	1.27897e-05	chr12.63347305.63348174	2.68391	2.9645e-05	1.75238	0.000249545	chr1.178677015.178677997	3.40276	9.27685e-09	2.30897	7.81715e-08
chr10.19001782.19002747	1.90628	0.000692237	2.4923	4.43871e-06	chr12.63512720.63513699	2.4355	4.55523e-05	1.7652	3.53525e-05	chr1.178720753.178721787	2.03584	0.000721621	2.00781	4.72799e-06
chr10.19176435.19176999	2.80563	0.000238927	2.56834	0.000800198	chr12.66564876.66565723	2.5035	1.45462e-05	1.58238	4.99688e-05	chr1.179136361.179137443	1.55023	0.00407281	1.20404	0.00183832
chr10.20039345.20040500	1.60612	0.00767763	2.14526	0.000306299	chr12.66625970.66626802	2.74235	1.81677e-05	1.86848	5.93784e-05	chr1.179205185.179205856	2.44479	8.7108e-06	2.3303	7.56769e-09
chr10.20166836.20167154	2.58651	0.000109401	2.72384	0.000171764	chr12.67272203.67273231	2.93874	8.3715e-07	2.15483	2.07201e-07	chr1.179216903.179217836	2.63051	0.000294239	1.41742	0.00599218
chr10.21268681.21269592	1.81552	0.00536177	2.11694	0.00249156	chr12.68051524.68052098	2.45861	0.000159092	2.45997	4.17753e-06	chr1.180363646.180364346	3.13341	3.32602e-06	1.82528	6.96822e-05
chr10.21341800.21343009	2.81415	1.83272e-06	2.55328	1.01135e-05	chr12.68192399.68193085	2.37222	0.0082048	2.19758	0.00404457	chr1.180958374.180959121	2.1978	0.0017964	2.11118	0.000199964
chr10.21446629.21447218	2.05569	0.00288341	1.76662	0.00912702	chr12.68733354.68734773	2.20888	0.00021299	2.15384	2.81899e-06	chr1.181032736.181033496	3.16537	3.06383e-05	1.88569	0.000952911
chr10.21560553.21561816	1.58296	0.00752628	2.1154	0.000306579	chr12.68881910.68883080	2.74254	2.2517e-05	1.67127	8.49639e-05	chr1.181515033.181515664	3.6149	5.64744e-07	1.809	0.000413272
chr10.21659261.21660299	1.8823	0.000552485	1.90344	0.000270782	chr12.69061595.69062516	3.1412	2.3466e-07	2.65578	1.20904e-09	chr1.181629382.181629988	2.86737	0.000163831	2.43842	8.30583e-05
chr10.22887047.22887760	2.1915	0.00718473	2.92885	0.000655028	chr12.72020781.72021874	2.01401	0.00224281	2.14671	4.94317e-05	chr1.181937055.181937616	1.65806	0.00981563	2.79691	8.95035e-07
chr10.23144338.23145202	2.32753	0.000136862	3.1225	6.5012e-07	chr12.72572721.72573959	2.66681	1.75965e-05	1.58084	0.000294237	chr1.182148853.182149742	2.71518	4.40496e-05	1.80978	0.000477228
chr10.23162215.23162972	1.72244	0.0071399	1.99509	0.00206969	chr12.73304457.73304932	2.4507	0.00564445	2.08429	0.0053282	chr1.182325144.182326355	1.77706	0.00655966	1.40049	0.00860568
chr10.23329518.23330105	2.18135	0.00480495	2.40754	0.00255087	chr12.73330108.73330751	2.88317	8.17714e-05	2.02543	0.000376166	chr1.182638883.182639764	2.52488	2.51308e-05	1.90161	3.00783e-05
chr10.23536095.23536794	2.10317	0.00517484	2.3824	0.00167709	chr12.73647510.73648273	2.58572	7.03295e-05	1.69197	0.000489007	chr1.182667203.182667557	3.77605	2.04142e-07	2.15821	2.63738e-05
chr10.23612056.23612660	1.73318	0.00281617	3.90211	1.16203e-09	chr12.73655882.73656350	3.65016	2.21734e-06	2.78745	3.65433e-06	chr1.182668046.182668822	3.94112	3.05279e-10	2.58759	1.73498e-10
chr10.24580930.24581650	2.09006	0.00219914	2.11642	0.00191979	chr12.74216132.74217015	2.06107	0.000421569	2.24768	6.16041e-07	chr1.182918632.182919578	2.30063	1.1208e-05	1.46997	4.55897e-05
chr10.24876493.24877187	2.28171	0.00288712	2.43948	0.00228456	chr12.75358691.75359243	2.2302	0.000827443	1.69176	0.00129893	chr1.182953128.182953957	3.04297	3.35083e-09	1.6954	4.18647e-08
chr10.25431430.25431864	2.34625	0.00124888	2.77103	0.000173893	chr12.76332480.76333113	3.36351	1.62691e-05	2.00296	0.00075589	chr1.182954563.182954903	1.87189	0.0033582	1.46993	0.00375731
chr10.25723866.25724376	2.34181	0.00192456	2.34031	0.00170419	chr12.76643734.76644685	2.20704	0.000142614	1.67932	1.47766e-05	chr1.183130963.183131878	2.12124	0.00196494	2.20657	0.000239862
chr10.25770077.25770725	2.5706	4.33111e-05	2.92484	4.32605e-06	chr12.76825194.76825822	2.74946	6.96162e-05	1.84269	0.000358229	chr1.183514119.183515258	3.15964	1.87736e-07	2.19859	5.777e-07
chr10.25914250.25915003	2.51664	0.00064425	1.94655	0.0072236	chr12.76891033.76891709	2.70172	0.000519742	1.72013	0.00619113	chr1.183521208.183522126	2.62446	0.000385543	1.62241	0.0043734
chr10.25945818.25946408	2.14182	0.00213709	2.44764	0.000572867	chr12.77586656.77587137	2.19966	0.00641364	2.37395	0.000876552	chr1.183554834.183555116	2.99464	0.000583285	2.68703	0.000254841
chr10.25982585.25983190	2.07438	0.00769166	2.88052	0.000414586	chr12.78921982.78922441	2.07506	0.00642157	2.96202	3.26807e-05	chr1.183555924.183556608	3.10218	1.75701e-05	2.02675	0.000236294
chr10.26034667.26035652	1.73403	0.00108349	1.6802	0.00109805	chr12.79182623.79183303	1.92483	0.00443791	1.90897	0.000586559	chr1.183560877.183562154	1.84795	0.000509187	2.0197	0.00276223
chr10.26243053.26244782	2.13126	6.58166e-05	2.12025	3.20451e-05	chr12.79248000.79248591	2.40965	0.00164363	1.99816	0.000862615	chr1.183624393.183624936	2.44184	0.00264183	1.79437	0.0077325
chr10.26249437.26250500	1.88599	0.000400902	2.4516	2.58731e-06	chr12.79821709.79822433	2.05731	0.00362101	2.25409	0.000160225	chr1.183672443.183673113	3.06689	1.74263e-07	2.10919	4.46145e-07
chr10.26264043.26264762	2.10774	0.00428867	2.0106	0.00532561	chr12.80983718.80984331	2.05354	0.00706286	2.09557	0.000920061	chr1.183861588.183863007	2.49891	7.90047e-06	1.09459	0.00391119
chr10.26302367.26302797	2.31826	0.00216881	2.26803	0.00300249	chr12.81300303.81300926	1.99951	0.00646913	1.76278	0.00488866	chr1.183890225.183891225	1.73563	0.00382366	2.06521	6.20463e-06
chr10.26358188.26359233	1.88937	0.0055987	2.03866	0.0017383	chr12.82400002.82400676	1.86618	0.000712775	1.79789	2.10522e-06	chr1.184489475.184490430	3.13148	4.5879e-07	1.53573	0.000224009
chr10.26555865.26556842	2.23534	0.000373604	2.75677	7.47614e-05	chr12.83144913.83145419	2.03199	0.00659025	1.6772	0.00742056	chr1.184569286.184570278	2.01921	0.00187521	1.60413	0.00367737
chr10.27476524.27477189	2.01537	0.00819157	2.14978	0.00501848	chr12.84668017.84668796	2.12666	0.00140841	1.96871	0.000238684	chr1.185020384.185021553	2.1857	6.50681e-05	1.35324	0.0008053
chr10.27483787.27484678	2.30824	0.00045646	2.83528	5.7523e-05	chr12.84686076.84686644	2.75746	0.000416101	2.38664	0.000392378	chr1.185079090.185080199	2.35909	1.87883e-05	1.78669	5.55335e-06
chr10.27838690.27839164	2.70393	0.000365982	2.53522	0.000922149	chr12.84732190.84733223	2.61174	6.21187e-05	2.20388	1.48185e-05	chr1.185219079.185220168	2.01057	0.000322984	1.70552	3.66014e-05
chr10.28695565.28696629	1.98846	0.00380936	2.14202	0.00306058	chr12.86036892.86038051	1.91593	0.000808099	1.72789	1.82705e-05	chr1.185293654.185294456	2.31018	0.000209635	2.24013	1.06677e-05
chr10.29193697.29194539	2.04076	0.000582543	1.71769	0.00283932	chr12.86652352.86653133	2.73533	2.09775e-05	1.22542	0.00777619	chr1.185379156.185379960	1.46341	0.00549863	2.45002	2.28639e-11
chr10.29368841.29369862	3.0047	2.01837e-05	2.76547	6.99197e-06	chr12.86724310.86724606	1.89784	0.00959244	2.1963	0.000721433	chr1.185598410.185599286	2.49966	0.000290964	1.57893	0.00483105
chr10.29420747.29421278	2.41837	0.00240055	2.88497	0.000604224	chr12.88885279.88885939	1.79262	0.00802315	1.74348	0.00115228	chr1.185851225.185852189	3.75142	1.47363e-09	1.73903	1.31386e-05
chr10.29424278.29425191	2.14526	0.0011146	2.75204	5.79399e-05	chr12.90013649.90014531	2.0923	0.000318004	1.63382	0.000101316	chr1.185915176.185916078	2.24268	3.4545e-05	2.1442	3.35834e-07
chr10.29539434.29540059	1.8115	0.00206007	2.61603	1.58005e-05	chr12.90794130.90794853	2.27046	0.00512462	1.84759	0.00789732	chr1.186093169.186093973	2.23266	0.00155178	2.08481	0.000235511
chr10.30270908.30271733	2.47159	0.00186432	2.64748	0.00146646	chr12.91534364.91535130	2.2761	0.000997326	2.976	4.94557e-07	chr1.186296806.186297989	3.59831	3.29503e-10	2.29323	3.9526e-09
chr10.30342747.30343534	1.84547	0.00753545	2.72857	0.00010062	chr12.93124573.93125581	2.39533	0.00041761	2.19226	8.90036e-05	chr1.186401148.186401856	1.80815	0.00932094	2.0552	0.000548862
chr10.32494417.32495272	2.49999	0.000582076	2.30208	0.00213914	chr12.93266502.93267474	2.10453	0.00249928	2.43632	7.36573e-05	chr1.186424711.186425790	2.38039	1.54013e-05	2.24779	3.68038e-07
chr10.32826072.32826677	2.52649	0.00136696	2.32916	0.00426412	chr12.94060231.94060976	2.67943	0.000170772	1.79848	0.00132174	chr1.187249210.187250057	2.28313	0.00102991	2.02446	0.000374326
chr10.33540319.33540863	1.9932	0.00339425	2.66105	0.000248991	chr12.94105613.94106316	2.40723	0.00141538	1.75876	0.00219088	chr1.187664765.187665473	1.71581	0.00848725	1.51332	0.00441437
chr10.34841816.34842803	1.93771	0.00694041	2.09216	0.00429843	chr12.94603749.94604354	3.34139	6.64518e-07	3.28292	8.39947e-10	chr1.188456158.188457243	3.43096	3.10777e-08	1.59369	0.000115853
chr10.38286437.38287529	1.74751	0.00666981	2.03296	0.00183589	chr12.94605438.94606257	2.62117	2.22668e-05	1.49852	0.000715679	chr1.188815333.188816274	2.99701	1.52591e-05	1.76442	0.000782831
chr10.38306334.38306978	3.13757	4.84378e-05	2.36354	0.00151462	chr12.95385848.95386594	1.88848	0.00341675	1.90638	0.000246281	chr1.188885958.188886564	2.33937	0.000310514	2.04169	0.000181135
chr10.38340017.38341171	2.20142	0.00092301	2.37107	0.000344318	chr12.95923137.95923972	2.38173	0.00123156	2.13631	0.000588548	chr1.189053471.189054117	2.62973	0.000551674	2.27257	0.000482707
chr10.38436791.38438003	2.11133	0.00137301	2.43014	7.12473e-05	chr12.97877670.97878588	2.10996	0.00261921	2.27987	0.000103674	chr1.189066845.189067634	1.97045	0.00305726	1.5587	0.00448674
chr10.38449315.38449711	2.73867	0.00145201	3.51121	0.000252171	chr12.98022238.98024439	2.00553	0.000185906	1.36538	1.30544e-05	chr1.189195725.189197517	2.63838	2.42503e-07	2.09262	4.50003e-10
chr10.38908024.38908806	1.45149	0.00389448	1.45951	0.00200394	chr12.98123397.98124135	2.39621	0.000928925	2.37935	7.49893e-05	chr1.189323827.189324547	1.97117	0.00334931	1.44573	0.0075678
chr10.38959739.38960700	1.82402	0.0090653	1.84887	0.00783562	chr12.98363167.98363974	2.18162	0.00271452	1.57195	0.0085593	chr1.189612196.189612646	2.93172	1.48015e-05	2.80832	2.58818e-07
chr10.39049328.39050460	1.99634	0.00139266	1.58258	0.00778838	chr12.98490328.98491430	2.15265	0.000433083	1.4843	0.000932707	chr1.190057032.190057785	2.71067	8.8806e-05	2.00077	0.000435969
chr10.39154096.39154704	2.7	0.000331169	1.91406	0.00531448	chr12.99979426.99980202	2.02966	0.00770564	1.68423	0.00435727	chr1.190220455.190221099	1.823	0.00708064	2.29059	3.59876e-05
chr10.39583493.39584174	1.98187	0.00764519	2.23234	0.00292994	chr12.100050431.100051144	2.48269	0.000752316	1.86162	0.00140348	chr1.190403158.190404135	2.94287	4.42135e-07	1.65302	5.90165e-05
chr10.40365015.40365305	3.15712	0.000410668	3.03681	0.00108574	chr12.100668603.100669739	2.19246	0.00314118	1.78139	0.00297243	chr1.190425078.190426260	2.96018	2.83368e-07	1.80814	1.24404e-05
chr10.40638316.40640199	2.13428	4.58059e-05	1.92708	0.000499894	chr12.100807247.100807584	2.17356	0.00888426	2.07021	0.00464289	chr1.190632129.190632738	3.35041	9.02604e-06	1.51756	0.00439271
chr10.41515094.41515394	2.62486	0.000628956	3.32802	5.50472e-05	chr12.102099736.102100434	2.71137	0.000416861	2.41302	0.000237564	chr1.190713372.190714510	3.91214	6.14235e-14	2.91133	1.40095e-17
chr10.41883873.41884219	1.84665	0.00320807	1.64777	0.00662273	chr12.102132165.102132681	1.97777	0.00480962	1.59075	0.00505866	chr1.191693014.191693745	3.14846	0.000122563	2.0077	0.00170736
chr10.42010851.42011641	2.2615	0.000749522	1.90574	0.00430992	chr12.103158886.103159837	1.90991	0.00305546	2.06484	0.000199623	chr1.192109225.192109503	2.14082	0.00188541	1.8525	0.000954194
chr10.42480538.42480940	2.29433	0.00643251	2.76783	0.00064973	chr12.103269451.103270279	2.40032	0.00184722	1.80365	0.00410239	chr1.192676887.192678367	2.06589	0.000891622	1.41227	0.00298949
chr10.43076672.43077016	2.86801	0.000602735	3.22327	0.000175385	chr12.103514375.103514942	1.61395	0.00730875	2.19967	2.2504e-06	chr1.193181321.193182252	2.23944	0.000358328	2.1172	2.29543e-05
chr10.44362793.44363266	2.45387	0.000809617	2.25014	0.00273635	chr12.104964939.104965772	2.82856	0.000108371	1.65943	0.00327544	chr1.193430084.193430979	2.39863	0.00170166	1.98124	0.00131948
chr10.44752702.44753610	1.55558	0.00604475	3.10242	5.76746e-08	chr12.106074058.106074980	2.07666	0.00669188	1.82081	0.00482094	chr1.193433277.193434271	2.17777	0.000278724	1.11663	0.00765251
chr10.45238931.45239613	1.93041	0.00616838	2.65825	0.000397709	chr12.106083643.106084606	3.01983	1.62691e-05	2.39598	1.04415e-05	chr1.193445700.193446462	1.60006	0.00656742	2.01523	2.13536e-05
chr10.45452002.45452680	1.95941	0.00337741	1.78996	0.00599091	chr12.106559230.106560221	3.92952	1.62253e-10	2.35765	2.32823e-10	chr1.193794490.193795047	1.82214	0.00729704	2.10989	0.000226946
chr10.45788276.45788937	2.57822	0.000203827	2.4239	0.000764674	chr12.108117302.108117836	2.27944	0.00221543	2.925	1.57815e-05	chr1.193798005.193798347	2.52479	0.00319659	2.16806	0.00237374
chr10.46054511.46054940	2.06348	0.00825889	2.63673	0.00129475	chr12.108841078.108841834	1.84832	0.00271421	1.8216	9.21997e-05	chr1.193998571.193999147	2.73837	0.000733447	2.16532	0.000903436
chr10.46193811.46194563	2.21628	0.00647361	2.80056	0.00198408	chr12.108849520.108850405	2.55865	0.000186181	1.66545	0.00204521	chr1.194030283.194031258	2.21836	0.000175176	2.17495	2.67976e-06
chr10.46576013.46576560	2.04473	0.00788414	2.82892	0.000624994	chr12.109525701.109526553	2.54854	9.66627e-05	2.37946	4.23133e-06	chr1.194060698.194061155	2.63412	0.00111953	2.35426	0.000376166
chr10.47475893.47476820	2.35447	0.00157806	2.16678	0.00177266	chr12.112422857.112423416	2.75013	0.000635518	1.76576	0.00689491	chr1.194456183.194456639	2.91472	0.00013499	2.21739	0.000202973
chr10.47857653.47858573	2.52581	2.42535e-05	2.75308	2.7009e-06	chr12.117553092.117553793	2.07993	0.00182654	1.73348	0.00113132	chr1.194560710.194561593	3.30875	1.09968e-08	1.64854	1.34253e-05
chr10.48867981.48868571	2.1521	0.0078287	2.47911	0.00325905	chr12.117627242.117627758	2.35034	0.000649518	2.33259	5.19444e-05	chr1.194769225.194769786	2.74692	1.16064e-05	1.88216	0.000201756
chr10.48872880.48873613	2.1881	0.000490896	3.12937	3.33155e-06	chr13.6998055.6999145	3.02519	2.80161e-07	2.67211	2.82354e-09	chr10.5105021.5105531	2.53935	0.0049229	2.07846	0.0058762
chr10.50868227.50868907	2.72634	6.25846e-05	1.82046	0.00423969	chr13.7250385.7251252	2.04382	0.00800123	2.48391	0.000272751	chr10.5439878.5440329	2.18606	0.00450639	2.51708	0.000174213
chr10.50987732.50988717	1.92135	0.00635945	2.24459	0.00144394	chr13.8264855.8265538	2.702	1.24898e-05	2.11924	4.22943e-06	chr10.5560155.5560470	2.3919	0.00741422	2.27714	0.00113132
chr10.51271173.51271969	2.43739	4.48688e-05	3.06008	6.82416e-07	chr13.9251909.9252606	2.39368	0.00212768	1.84764	0.00489521	chr10.6114554.6115391	2.38709	8.92673e-06	1.60482	1.85921e-05
chr10.52132615.52133803	1.76344	0.0074885	1.83398	0.00649797	chr13.9630411.9631361	2.48595	6.96162e-05	1.41804	0.00156385	chr10.6497421.6497948	2.55155	0.00315269	2.32877	0.00134981
chr10.52321733.52322339	2.39261	0.000226312	2.27597	0.00112684	chr13.10480072.10480898	3.21262	2.36854e-07	2.83907	0.000360338	chr10.6846216.6847031	2.22916	0.000329401	1.51847	0.00133128
chr10.52926234.52926921	1.9198	0.000455747	1.9398	0.000200407	chr13.12196956.12197551	1.87025	0.00235978	1.40862	0.00222777	chr10.8063390.8064275	2.46934	5.35619e-05	1.27589	0.00291729
chr10.53367225.53367839	2.5756	0.000349044	2.36391	0.00110679	chr13.12232628.12233430	2.45882	0.00106128	2.44435	0.000227202	chr10.8963037.8963611	3.86422	7.48914e-08	1.72995	0.000360555
chr10.53414130.53415063	2.30271	7.46836e-05	2.20459	8.94003e-05	chr13.12307441.12308250	1.86678	0.00280271	2.09998	4.5829e-05	chr10.8965940.8966446	3.63865	6.5503e-07	2.74357	6.80751e-07
chr10.54448220.54449225	1.48901	0.00921076	2.79136	2.7009e-06	chr13.13616057.13616675	2.48526	0.00055203	1.81578	0.00171725	chr10.9019395.9020145	2.43459	0.000266685	1.91465	0.000302301
chr10.54871182.54872351	2.91082	5.26556e-05	3.28665	1.73185e-05	chr13.14271335.14272064	2.1641	0.000624091	2.27558	1.00844e-05	chr10.9334121.9334827	1.90769	0.00506587	1.75527	0.00113689
chr10.54993556.54994281	2.21647	0.00112561	2.73459	7.67706e-05	chr13.14705660.14706619	1.6963	0.00463591	2.44357	2.79502e-07	chr10.9509507.9510676	2.76903	1.14825e-07	1.45639	1.69594e-05
chr10.56175240.56175800	2.96562	0.000121205	2.37914	0.00196818	chr13.14892362.14893008	3.21003	1.14668e-05	2.71173	4.8345e-06	chr10.9668465.9669142	2.38601	9.28552e-05	2.18403	7.459e-06
chr10.57474190.57474665	2.18732	0.00770028	2.47947	0.00406331	chr13.15423248.15424510	1.9065	0.00309053	1.61593	0.00054414	chr10.9778132.9778465	3.26485	0.00017268	2.35814	0.000608317
chr10.58269346.58269955	3.00612	1.1069e-05	3.28074	7.22259e-07	chr13.15582076.15583157	1.54845	0.00690922	2.14782	2.66934e-07	chr10.9933129.9933572	3.35564	0.000187425	2.03039	0.00345438
chr10.58331652.58332283	1.93858	0.00127584	2.11879	0.000360527	chr13.15615361.15616188	2.17787	0.00023219	1.97177	2.88851e-06	chr10.10097143.10097973	2.23366	0.000560004	1.74005	0.000622132
chr10.58477976.58478673	2.01964	0.00212003	3.15283	1.36697e-05	chr13.15916420.15916891	2.27457	0.00382096	1.83196	0.00605481	chr10.10230886.10231629	2.31756	0.00280917	1.81622	0.00510953
chr10.58480062.58480542	2.47321	0.00146181	2.05901	0.00763855	chr13.16339433.16340445	2.51176	0.000104936	2.21454	7.07517e-06	chr10.10461888.10462360	3.94226	7.72728e-06	2.45804	0.000113145
chr10.58554543.58555363	2.86939	5.85062e-05	2.36152	0.000177453	chr13.16528806.16529620	1.69388	0.00925896	1.73698	0.00131976	chr10.10762945.10763858	1.98432	0.00305636	1.81949	0.00080284
chr10.59114885.59115995	1.81635	0.00286127	2.84065	3.31031e-06	chr13.17012175.17012902	2.18094	0.00335197	2.42344	0.000158039	chr10.10913304.10914213	2.21363	8.87195e-05	2.15494	2.66268e-07
chr10.59127579.59128362	2.27573	0.000311866	3.08399	4.80213e-06	chr13.17040196.17041468	1.81033	0.00234463	2.20576	2.51583e-06	chr10.11064718.11065478	2.75059	1.54569e-05	1.29723	0.00639269
chr10.59565788.59566428	2.53959	0.000330818	1.76038	0.00988705	chr13.20046052.20046942	2.91005	1.38017e-06	2.98347	1.97342e-09	chr10.12049418.12050113	2.6932	0.000574194	2.04622	0.00119634
chr10.59825186.59825915	2.30842	0.000223332	2.87728	1.16297e-05	chr13.20116486.20117590	2.13969	0.000511526	1.17416	0.00823643	chr10.13289295.13290180	1.91261	0.00255979	1.3579	0.00500782
chr10.60995809.60996855	1.74561	0.00496536	2.37649	0.000279061	chr13.20304383.20304960	2.42696	0.0017886	2.31546	0.000691275	chr10.13627758.13628300	2.78713	0.000246749	2.00269	0.000916363
chr10.61431273.61431791	2.89208	2.51539e-05	3.54073	1.35473e-06	chr13.20517619.20518217	2.59558	4.18002e-05	1.61088	0.000172016	chr10.14439220.14439930	2.94368	0.000142181	2.1208	0.000552955
chr10.62410344.62410721	2.9117	0.00071266	2.6662	0.00197394	chr13.20962910.20963839	1.7946	0.00409516	1.36348	8.63867e-05	chr10.14677287.14678140	2.42258	0.00128213	1.57436	0.00917866
chr10.62411900.62412542	2.96775	5.97946e-05	2.78914	0.000185786	chr13.25257360.25258148	1.60289	0.00377029	2.79685	1.09458e-11	chr10.14875125.14875902	3.41236	2.23349e-08	1.60082	0.000102805
chr10.62892570.62892893	2.31568	0.00884657	2.80049	0.003182	chr13.25392540.25393581	3.59829	2.25848e-10	3.48916	3.48687e-21	chr10.14878959.14879262	2.40127	0.00210869	2.51271	0.000119193
chr10.63167397.63168351	1.84678	0.00419255	1.94889	0.00225962	chr13.25839437.25840009	2.7661	3.51475e-05	2.53969	5.18749e-07	chr10.14881879.14882619	3.32838	4.73664e-06	1.74097	0.000755445
chr10.63351766.63352560	1.80571	0.00608365	2.3622	0.000435906	chr13.26041590.26042308	2.41385	0.00227676	1.72941	0.00885713	chr10.14992060.14992876	3.84091	1.04897e-10	3.13912	1.14428e-11
chr10.63894428.63895211	3.11275	5.30362e-06	2.47928	0.000159818	chr13.26119212.26119785	1.92705	0.00281617	1.86255	0.00016468	chr10.15248627.15249294	3.30981	3.77951e-05	1.60881	0.00714857
chr10.64311344.64312386	2.30402	0.000179122	2.68418	2.36466e-05	chr13.26944659.26945582	3.32005	5.60487e-07	2.8283	6.56028e-08	chr10.15333435.15333798	2.29295	0.00569723	2.39204	0.00083555
chr10.65101150.65101575	2.32404	0.00440032	2.67616	0.00182449	chr13.26988338.26988781	3.05026	4.35301e-05	2.37788	8.59333e-06	chr10.16228905.16229303	2.80672	0.000569205	2.64226	0.000117743
chr10.65118155.65119054	2.49961	0.00084509	3.2585	3.71608e-05	chr13.29110125.29110648	2.76334	2.48194e-05	2.66046	8.01269e-07	chr10.16231433.16232338	3.59762	7.39349e-08	2.63461	5.06419e-08
chr10.65223984.65224502	2.61386	0.00062556	3.0043	0.000228189	chr13.29247900.29248951	2.69775	1.06696e-05	2.26125	9.46613e-07	chr10.16250529.16251449	4.29959	1.48039e-11	1.12328	0.00246199
chr10.65931944.65932503	2.54873	0.00204667	3.02044	0.000569009	chr13.29561371.29561933	2.20078	0.00451204	1.98812	0.00284046	chr10.16713039.16713738	4.4504	6.76281e-13	1.85231	3.21073e-07
chr10.66283289.66284479	2.33585	0.00038231	1.91283	0.00267014	chr13.29766194.29766794	2.23986	0.00111074	1.67766	0.00208819	chr10.16750196.16751123	2.42385	0.000203789	1.91828	0.000128184
chr10.66637183.66637840	2.10572	0.0052671	2.96369	0.000168995	chr13.31107265.31108102	1.8039	0.00990052	1.49867	0.00918587	chr10.17218181.17218957	2.85085	5.37069e-05	2.80809	2.62547e-06
chr10.66904574.66905548	2.81327	8.28138e-05	2.0813	0.0024386	chr13.32055189.32055884	2.3298	0.00128986	2.11824	0.00039414	chr10.17259812.17260753	2.70226	1.74033e-05	2.48809	1.52787e-07
chr10.67083470.67083978	2.30319	0.00431285	3.1183	0.000340797	chr13.34500405.34501054	2.35366	0.000875228	1.8696	0.00109068	chr10.17287937.17288729	1.77632	0.00500366	1.30098	0.00582222
chr10.67491914.67492724	2.21622	4.04943e-05	3.20279	1.85728e-08	chr13.34632728.34633343	2.63741	9.36962e-05	2.13518	5.14476e-05	chr10.18353682.18354734	2.25417	0.000533301	1.72885	0.000735015
chr10.67864869.67865491	2.84473	2.95176e-05	3.15863	3.45452e-06	chr13.35259898.35260571	2.03193	0.00823297	1.92714	0.000999799	chr10.18418224.18419007	3.13784	7.07787e-06	2.04426	5.1089e-05
chr10.67880357.67881098	2.33086	0.000424766	2.41236	0.000505775	chr13.35503304.35504177	2.06174	0.000205299	1.90207	1.31675e-06	chr10.18692653.18693021	2.7836	1.70409e-05	2.05745	0.000150766
chr10.67910470.67910805	1.75667	0.00614029	2.74704	3.64254e-05	chr13.37680723.37681519	1.94769	0.00088193	2.06641	3.62263e-06	chr10.18999210.18999864	1.75094	0.00808187	1.85372	0.00111484
chr10.67927635.67928396	2.16786	0.000427302	2.91849	5.0325e-06	chr13.38878499.38879701	2.5194	4.21058e-05	1.98472	7.48912e-10	chr10.19170478.19171477	1.58489	0.00316969	2.01468	3.1674e-07
chr10.67985083.67985545	2.84584	0.000573933	2.49735	0.00233992	chr13.38918155.38918918	1.84417	0.00276599	1.90219	8.52378e-07	chr10.19265185.19265945	3.00058	0.000405393	1.70635	0.00942518
chr10.67987209.67987574	3.42199	1.273e-05	2.87903	0.00018452	chr13.42590264.42590775	2.43584	0.00078402	1.7435	0.00311138	chr10.19494774.19495211	2.69252	0.000644306	1.80063	0.00442214
chr10.69155329.69156009	2.7395	4.96934e-06	2.5801	3.07e-05	chr13.42656638.42657636	1.76608	0.00286606	1.12525	0.00846316	chr10.19818643.19819632	2.79868	1.20336e-05	1.74389	0.000223615
chr10.69166441.69167195	2.43602	0.000263514	2.51791	0.000241961	chr13.44828871.44829695	1.98049	0.00335881	1.44565	0.00614821	chr10.19832742.19833563	3.70031	6.85783e-11	1.44337	3.27041e-05
chr10.69167791.69168507	1.77096	0.00580494	3.06595	1.31122e-06	chr13.45457284.45457908	2.08961	0.00389068	3.16475	4.16964e-06	chr10.19835597.19836734	4.25306	6.04593e-16	2.32389	3.53765e-13
chr10.69854436.69855355	1.88974	0.00406716	1.8012	0.0033235	chr13.46238700.46239321	2.6469	0.00114399	2.22451	0.00144176	chr10.19849329.19851875	1.97429	3.79737e-06	1.08809	1.36116e-07
chr10.70266469.70267050	2.04097	0.00813409	2.52829	0.00254843	chr13.47718955.47719990	2.65532	0.000207749	1.58783	0.0041511	chr10.20045738.20046700	2.28695	4.34532e-05	1.91587	6.69875e-06
chr10.70305461.70306510	1.77933	0.00600939	2.41467	0.000237216	chr13.51279629.51280725	2.06835	0.000661407	2.62981	4.41186e-08	chr10.20506324.20507284	2.69116	1.76669e-05	1.71876	0.000294237
chr10.70372237.70373187	2.56045	7.07644e-05	1.74082	0.00406012	chr13.51758390.51758911	2.29919	0.000838347	1.36507	0.00924074	chr10.20568612.20569143	2.47129	0.00103243	1.91148	0.00186044
chr10.70455584.70456604	2.30148	0.000168972	2.8252	1.09659e-05	chr13.53684348.53685522	2.06308	0.00132042	1.61034	0.00112889	chr10.21545981.21546477	3.56275	4.31123e-05	2.00556	0.00222296
chr10.70901040.70901782	2.05464	0.00341703	2.2626	0.00183824	chr13.54093354.54093949	2.9813	7.05061e-05	1.60503	0.0070304	chr10.21711330.21712188	2.34475	0.000106078	1.27735	0.00464591
chr10.70918891.70920236	1.58706	0.0088848	1.52446	0.00896707	chr13.54322408.54322930	1.8357	0.00947169	2.31683	0.000253938	chr10.23643095.23643642	2.65601	0.00082887	2.29106	0.000589852
chr10.70979477.70980018	2.14358	0.00966516	2.32786	0.00539159	chr13.55168771.55169514	2.16671	0.000259866	2.39427	1.74398e-07	chr10.23937816.23938863	2.12845	0.000449221	1.33717	0.00267656
chr10.71114115.71115110	2.61689	5.17579e-05	2.36669	0.00010541	chr13.55371092.55371917	2.03794	0.00345433	2.24639	9.51241e-05	chr10.24217593.24218417	1.64445	0.00585385	2.01012	2.85672e-05
chr10.71150400.71150818	2.78437	0.00315737	3.08397	0.00240191	chr13.69915667.69916323	3.1161	2.59345e-05	1.46254	0.00879514	chr10.24702487.24703283	2.92771	1.26447e-06	2.0726	6.4043e-06
chr10.71214591.71214965	2.7473	0.00131564	2.64143	0.00257908	chr13.70239171.70239901	2.39383	0.00487894	1.99277	0.00639002	chr10.24813366.24814036	2.80404	3.15095e-05	2.51498	5.30666e-06
chr10.71380354.71380858	2.34569	0.00227361	3.57645	1.5666e-05	chr13.70718782.70719878	2.2996	0.000366104	2.24402	6.14784e-06	chr10.24914241.24915114	3.24367	5.68854e-08	2.6202	5.82425e-09
chr10.71412492.71413182	2.08343	0.00641825	1.98257	0.00906439	chr13.73063692.73064490	2.38042	0.000500442	2.82876	1.05799e-06	chr10.24977259.24978019	1.5823	0.00563832	2.74343	1.67315e-09
chr10.71617002.71617596	2.75137	3.00062e-05	3.31874	1.97561e-06	chr13.73902976.73903627	2.16355	0.00100508	2.18362	5.98252e-05	chr10.25305230.25305967	1.9833	0.00230409	1.36578	0.00493473
chr10.72413155.72413411	2.40478	0.00503808	2.81879	0.00215532	chr13.74903199.74904320	2.0302	0.000332283	1.52657	0.000119378	chr10.25311402.25312504	1.58667	0.00168335	1.16211	0.000332827
chr10.72667511.72668300	1.852	0.00223961	1.92596	0.000977697	chr13.75384646.75385513	1.99555	0.00161319	2.24409	1.21275e-05	chr10.25580121.25580946	2.78487	1.99972e-05	1.76284	0.000450115
chr10.72744341.72744860	3.10925	8.0336e-05	3.43002	9.64475e-05	chr13.75457338.75458297	2.81497	1.07357e-05	2.7284	8.08116e-08	chr10.26211681.26212410	2.77348	1.93564e-05	2.30968	6.70705e-06
chr10.72747798.72748745	2.64412	0.000195987	2.4038	0.00127237	chr13.75568673.75569664	2.66672	1.41247e-05	1.89155	2.66984e-05	chr10.26759356.26759960	3.43196	4.08035e-08	2.32497	1.93351e-07
chr10.72837858.72838326	2.76175	0.00353618	2.79155	0.0033696	chr13.75641031.75641370	3.4841	9.41919e-06	3.40549	4.28946e-07	chr10.26896459.26897350	2.18735	0.00079924	1.64288	0.00297243
chr10.72887788.72888557	2.3362	0.00249928	2.46171	0.00204075	chr13.76543954.76544637	2.59876	1.06423e-05	2.27446	1.91386e-07	chr10.26993017.26993683	2.06628	0.00623735	1.92977	0.00288522
chr10.73037343.73037881	2.84326	0.000678117	3.6035	2.67458e-05	chr13.76942531.76943394	3.18578	4.44897e-06	2.22876	2.5831e-05	chr10.27040022.27040825	2.59746	1.06564e-05	2.01675	9.41882e-07
chr10.73383726.73384505	2.30213	0.00129194	2.2473	0.000993287	chr13.80938896.80939721	2.18372	0.00108923	1.51548	0.00225165	chr10.28425131.28425996	2.76385	2.54915e-07	1.07343	0.001481
chr10.73384591.73385366	1.90781	0.00722155	2.73245	0.000277084	chr13.81143210.81144478	1.99664	0.00138639	1.96438	3.99544e-05	chr10.29855518.29856286	2.74656	2.31412e-05	1.36022	0.00420735
chr10.74402867.74403955	1.8884	0.000475189	3.24776	3.70708e-09	chr13.81680751.81681347	2.14045	0.00884759	2.34815	0.00119928	chr10.30154512.30155142	2.19649	0.00215819	1.97669	0.0012146
chr10.74729562.74730303	2.33645	0.00137301	2.01742	0.00644893	chr13.82075323.82076149	2.8179	0.000150877	1.6097	0.00548448	chr10.30527078.30527821	2.37581	0.00104159	2.37634	0.000155966
chr10.74856880.74857440	3.21956	0.000384245	2.99687	0.00118768	chr13.82264821.82265859	2.25313	0.000123809	1.3544	0.00036842	chr10.30992143.30992995	2.95952	1.53365e-06	2.41467	4.29085e-07
chr10.75197803.75198285	2.87952	0.00028416	3.11697	0.000196782	chr13.82355185.82355956	1.97456	0.00229783	1.34139	0.00701065	chr10.31008928.31009829	3.37161	2.09279e-09	2.53799	5.62831e-11
chr10.75303197.75304335	1.77179	0.00576806	1.83024	0.00366962	chr13.82888299.82889137	2.19688	0.0028481	2.44463	0.000136513	chr10.31272486.31273683	2.17991	0.000168955	1.6709	0.000122351
chr10.75788252.75788691	3.78825	1.19801e-05	4.40185	2.04446e-06	chr13.83023546.83024703	2.68012	1.13607e-05	2.19139	6.68625e-07	chr10.31287200.31287916	3.63205	4.46775e-08	3.1532	2.87448e-10
chr10.75828352.75829077	1.80596	0.00269312	2.42899	5.82665e-05	chr13.83073891.83074843	1.92645	0.00181781	2.5028	2.60057e-07	chr10.31352126.31353732	3.56414	2.03157e-10	1.43739	4.54638e-05
chr10.75896133.75896591	2.76681	7.13544e-05	2.75851	1.31736e-05	chr13.83273464.83274253	3.20622	4.06043e-06	2.8447	3.19741e-07	chr10.31540432.31541302	3.01003	3.73903e-07	1.97412	2.84159e-06
chr10.76012910.76013558	2.18106	0.00475236	2.77363	0.000641781	chr13.84085565.84086454	2.42953	0.000541846	1.5867	0.00399898	chr10.31962344.31962992	3.03613	3.26928e-05	2.3073	6.49732e-05
chr10.76357368.76357936	2.49583	0.000331608	3.48279	6.39946e-06	chr13.84520389.84521269	2.6696	0.000209561	2.70954	1.37747e-05	chr10.32379858.32380567	2.71349	0.000191323	2.08022	0.000365086
chr10.76368610.76369426	1.90187	0.00805341	3.15674	1.9054e-05	chr13.85121798.85122511	2.60845	0.000266463	2.20087	0.000175842	chr10.33081900.33082892	2.4983	4.41932e-05	1.41117	0.00204308
chr10.76430285.76430695	2.2879	0.00821075	2.96633	0.00134804	chr13.85158438.85159367	2.37746	0.000344177	2.54077	1.01363e-05	chr10.34244075.34245103	2.21378	0.000255029	1.70704	0.000365377
chr10.77035510.77035914	2.27014	0.00251729	3.60564	1.10886e-05	chr13.86010427.86011463	3.27416	4.24995e-06	1.87537	0.000376537	chr10.34847229.34848239	2.83669	1.01669e-05	2.29107	6.21808e-06
chr10.77093815.77094447	2.52856	0.000432411	3.15669	3.25905e-05	chr13.87967431.87968293	2.67014	0.000746893	2.69399	0.000175599	chr10.35343679.35344411	4.19991	4.01931e-13	1.86725	5.46408e-08
chr10.81005558.81006805	1.58732	0.00590973	2.6565	3.38491e-06	chr13.88902032.88902573	2.55441	0.00191666	1.82611	0.00937843	chr10.35654455.35655532	2.37922	4.67239e-05	1.29202	0.00236154
chr10.82661573.82662219	1.61961	0.0063851	3.42901	1.45576e-07	chr13.89371514.89372193	3.32306	1.00129e-05	2.29179	6.09372e-05	chr10.35903907.35904816	3.00357	4.36452e-05	2.18014	0.000160316
chr10.82689584.82691187	1.58649	0.00791416	1.59663	0.00764983	chr13.89564308.89564975	1.86426	0.00201145	3.30175	2.90451e-11	chr10.36700721.36701483	2.83853	7.84242e-05	2.14855	0.00016051
chr10.84089000.84090075	2.03123	0.00034546	3.23638	1.35101e-07	chr13.89640385.89641065	2.24894	0.00423294	2.28102	0.00114936	chr10.37571181.37572119	2.73375	1.05805e-05	1.80886	6.9069e-05
chr10.85540573.85541138	2.29242	0.00146943	2.59351	0.000465259	chr13.89911174.89912123	2.05235	0.00173246	1.8164	0.000475959	chr10.37647865.37648490	2.55099	0.000532106	1.71942	0.00466837
chr10.85639634.85640526	2.14526	0.00352079	1.96223	0.00357306	chr13.90135874.90136995	1.64707	0.00389351	1.73954	3.31254e-05	chr10.37691707.37692568	2.35101	2.07186e-05	2.12228	1.73602e-07
chr10.85673115.85674121	1.72145	0.00769836	2.44493	0.000285664	chr13.90187272.90188095	1.76515	0.0086433	2.06938	0.000199464	chr10.37868741.37869496	3.44316	9.6171e-07	2.5968	1.00328e-06
chr10.86425564.86426469	1.89902	0.00545676	2.22903	0.000843208	chr13.90399092.90399878	2.38051	1.22771e-05	2.34572	7.81163e-10	chr10.38291825.38292624	2.33578	7.18211e-05	1.06181	0.00777199
chr10.86776271.86776799	1.87635	0.0028237	2.17061	0.000513474	chr13.90414624.90415294	2.26399	0.00617795	2.23027	0.00157118	chr10.38711755.38712398	2.68796	6.70156e-05	2.21753	3.37393e-05
chr10.86794299.86795880	1.39648	0.00727899	1.5032	0.00252151	chr13.90510511.90511077	2.86685	0.000277343	2.58649	0.000102519	chr10.38994275.38995383	2.53959	1.5005e-05	1.99553	4.60431e-06
chr10.86809652.86810674	1.56029	0.00904014	1.92279	0.0013082	chr13.90851024.90851741	3.11175	9.13446e-05	1.90101	0.0026601	chr10.39230641.39231659	2.57489	2.95673e-05	1.84093	8.50357e-05
chr10.86818647.86819143	3.49064	1.75111e-08	2.54709	7.07109e-06	chr13.92462889.92463300	3.09943	0.000253358	2.43604	0.000634386	chr10.39266409.39267681	1.65909	0.00596864	1.53615	0.000101789
chr10.86939232.86940105	2.12777	0.00182037	2.38278	0.000559571	chr13.93029311.93029910	1.85214	0.00367092	2.47044	2.47937e-06	chr10.39345062.39346086	4.55019	5.4007e-13	1.32345	0.000171842
chr10.86974982.86976406	1.45411	0.00747904	2.66716	3.46254e-07	chr13.93034468.93035027	3.26839	2.98761e-06	2.26691	3.15648e-05	chr10.39618189.39618717	3.1673	4.10153e-05	1.64563	0.0096016
chr10.87083926.87084690	2.56782	3.00492e-05	2.71374	1.92864e-05	chr13.93838935.93840030	1.85659	0.0034642	1.51729	0.00208426	chr10.39628897.39629656	2.79706	9.16375e-07	1.99777	1.48081e-06
chr10.87107414.87108554	1.77691	0.00837958	1.82336	0.00672132	chr13.93984484.93985093	2.77605	5.25997e-05	2.12757	6.78209e-05	chr10.40018087.40018833	2.07112	0.000700974	2.50449	1.2648e-06
chr10.87209415.87209828	2.32903	0.00234105	2.37005	0.00251283	chr13.94264521.94265453	2.54027	8.1205e-05	2.06473	2.75528e-05	chr10.40420617.40421336	2.38248	5.03982e-05	1.81941	4.3201e-05
chr10.87212373.87213292	1.94112	0.00326159	2.69163	5.01862e-05	chr13.95095567.95096275	1.63424	0.00671365	2.21198	4.94557e-07	chr10.40772289.40773209	3.99472	4.36457e-09	1.82746	8.81675e-05
chr10.87534312.87534879	1.89876	0.00908553	1.98402	0.00700066	chr13.95809390.95810133	2.0388	0.00127985	1.96713	8.57841e-05	chr10.42417421.42418328	2.94551	7.47871e-06	1.88105	4.03989e-05
chr10.87540951.87541651	2.34764	0.000142006	2.76081	1.24552e-05	chr13.96302311.96303241	2.4929	0.000377253	1.72275	0.00177184	chr10.42466984.42467607	1.87226	0.00175544	1.65365	0.000401795
chr10.88419976.88421050	1.73998	0.00877495	1.94557	0.0031398	chr13.97769784.97770133	2.13578	0.00935037	2.31954	0.00137996	chr10.42734927.42735891	2.47456	0.00052716	2.41431	2.76191e-05
chr10.88780554.88781103	2.11874	0.00535398	3.51435	4.15942e-05	chr13.99282536.99283384	2.72202	4.47363e-05	1.97736	0.000117349	chr10.42912230.42913313	3.10887	5.08772e-06	1.91697	7.75437e-05
chr10.88849926.88850532	2.06384	0.00658365	2.39385	0.00393794	chr13.99611787.99612644	2.80855	1.34859e-05	1.56178	0.00262164	chr10.43055486.43056380	1.9949	0.00100554	2.51156	9.11883e-07
chr10.88877190.88878087	2.18575	0.00270885	2.63278	0.000358164	chr13.100874597.100875163	2.23883	0.00311178	1.78616	0.000449056	chr10.43135863.43136652	1.76761	0.000268359	1.86353	7.96786e-09
chr10.88960505.88961267	2.28827	0.000512308	2.67425	5.94167e-05	chr13.101219421.101220193	1.8478	0.00434905	1.85002	0.000337999	chr10.43186517.43187328	3.36328	7.72728e-06	2.45316	3.10663e-05
chr10.90077885.90078393	3.10741	9.24234e-05	2.92028	0.00052418	chr13.101498858.101499489	2.80476	0.000134021	2.19977	0.000149187	chr10.43317223.43317990	3.28947	8.39905e-06	1.68386	0.00290729
chr10.90546518.90547222	2.27849	0.000701431	2.77922	0.000148111	chr13.103114219.103114833	2.54059	3.11809e-05	2.24696	1.31803e-06	chr10.43421924.43422976	4.06236	1.08388e-15	2.78783	1.46672e-19
chr10.90999901.91000338	2.33463	0.00133728	3.66202	7.73772e-06	chr13.103348982.103349403	2.99233	3.68149e-05	1.59953	0.00344027	chr10.43654705.43656111	1.36823	0.008539	1.12589	0.00114014
chr10.91191786.91192714	2.97323	1.07268e-05	3.56522	1.33698e-07	chr13.104162612.104163198	2.26934	0.00388488	2.06429	0.00261175	chr10.43887290.43888479	2.06162	0.00038158	1.30913	0.00222529
chr10.91267817.91268223	2.27119	0.00473561	2.31331	0.00384526	chr13.104509466.104510603	1.90572	0.00194756	1.71379	0.000245702	chr10.44451817.44452159	2.60681	0.00509927	2.1891	0.00477735
chr10.92992432.92993210	2.96186	2.22589e-06	3.31049	5.50974e-07	chr13.105537888.105538380	2.8184	3.78608e-05	1.54242	0.00212975	chr10.44492652.44493721	2.1887	0.000138637	2.26846	2.95749e-07
chr10.93036567.93037136	2.85046	0.000205508	2.82319	0.000647423	chr13.107059284.107060441	1.67323	0.00804376	1.74004	0.000581243	chr10.44796545.44797577	3.25048	4.64234e-08	1.90598	8.00946e-07
chr10.93070131.93070881	1.8229	0.00305411	1.63287	0.00756992	chr13.107573560.107574772	1.92681	0.00103295	2.11902	2.04132e-06	chr10.44928087.44928853	3.03374	4.82632e-06	2.54392	8.91882e-07
chr10.93129209.93130129	1.65267	0.00821075	2.02128	0.00113152	chr13.107587555.107588586	1.67798	0.00625043	2.05954	2.01357e-05	chr10.44981743.44982292	2.99968	4.05862e-05	2.45905	2.68572e-05
chr10.93151733.93152288	1.83246	0.00667927	2.97215	4.40615e-05	chr13.107610770.107611698	2.87142	4.05371e-05	2.00794	0.000217861	chr10.45077245.45077950	2.23241	0.000234275	1.73943	0.000224308
chr10.93266389.93267005	2.33002	0.000112383	3.13338	3.07719e-07	chr13.109146762.109147487	2.14272	0.00117183	1.44481	0.00469736	chr10.45320688.45321892	3.53564	4.87356e-10	1.74182	1.1782e-06
chr10.93419786.93420580	2.02216	0.00305546	2.24006	0.00134804	chr13.109303205.109303993	2.64729	5.93103e-05	1.67417	0.000817521	chr10.45944889.45945332	2.60974	0.00113317	2.15103	0.00134
chr10.93437545.93438182	2.44487	0.00397914	2.76506	0.00165509	chr13.109973717.109974170	2.34673	0.00252477	2.21925	0.000929264	chr10.46139570.46140219	3.29345	2.23389e-07	2.00071	1.41641e-05
chr10.93633548.93634097	2.55582	0.00162145	2.94462	0.000618934	chr13.110712242.110713205	3.21672	1.21456e-05	2.47363	1.01363e-05	chr10.46297188.46297748	2.52236	0.000891368	1.98526	0.00166238
chr10.93680695.93681090	3.17257	2.06145e-05	3.46	1.27086e-05	chr13.110784155.110785087	1.61465	0.00807226	1.66505	0.000250384	chr10.46517347.46517875	2.22662	0.00169978	1.8721	0.000531367
chr10.93719490.93720015	2.63486	0.00119496	2.43646	0.00403091	chr13.111244289.111245076	2.21542	0.00564647	1.76012	0.00863057	chr10.46936286.46937063	3.67512	4.01166e-10	2.68177	7.39939e-09
chr10.94595533.94596245	2.42665	0.000772874	1.97358	0.00570108	chr13.111990499.111991599	2.98723	3.8863e-08	1.52639	2.35116e-06	chr10.47194277.47195494	3.59005	5.18691e-10	2.09132	0.00519071
chr10.94777280.94778104	2.71404	3.11174e-05	3.01928	9.51672e-07	chr13.112012775.112013556	1.89092	0.00534109	1.57093	0.00349117	chr10.47274921.47276171	2.48209	4.2569e-06	2.33602	6.14529e-09
chr10.94969916.94970805	1.80488	0.00450821	2.3475	0.000512915	chr13.112758158.112758957	2.10046	0.00146196	1.83047	0.000531565	chr10.47301774.47302313	3.33405	2.89727e-05	2.4001	0.000114611
chr10.95155383.95156037	3.06452	0.000194417	2.48739	0.00175797	chr13.113256610.113257157	2.34223	0.000596648	1.3901	0.00997075	chr10.47352100.47352636	3.45919	4.18049e-05	2.75807	4.08102e-05
chr10.95599604.95600188	2.09313	0.00459282	2.45417	0.00162017	chr13.113589255.113590016	1.87531	0.00350144	1.65609	0.00167601	chr10.49486889.49487772	2.63974	1.12497e-05	2.20754	4.89182e-06
chr10.95615825.95617038	1.5118	0.00192926	2.58707	1.35687e-08	chr14.8331335.8332132	3.04353	1.84421e-05	1.74763	0.001012	chr10.52288102.52288718	3.6077	2.55702e-06	1.43161	0.00981643
chr10.95705523.95706606	2.29466	0.000215568	2.2493	0.000230444	chr14.9161131.9161916	1.89688	0.00176043	2.34741	1.16923e-06	chr10.52536680.52537406	2.40728	4.94053e-05	1.80715	5.29079e-05
chr10.95756355.95756898	2.18081	0.00205178	2.93856	9.67493e-05	chr14.9535033.9536207	1.95606	0.000342309	2.5364	1.40016e-12	chr10.52857792.52858860	1.92074	0.00103754	1.77014	8.56038e-05
chr10.97077691.97078767	1.85534	0.00128875	3.18615	1.87698e-07	chr14.9672527.9673355	3.30409	1.75456e-08	2.80992	7.75876e-11	chr10.52956510.52957086	2.49483	0.000264748	1.38877	0.00843688
chr10.97282415.97283655	1.83845	0.00484719	1.98661	0.00208543	chr14.9766351.9767661	2.72851	2.14998e-06	2.96246	2.91363e-19	chr10.53030843.53031899	1.90605	0.00180999	1.28216	0.00702762
chr10.97436478.97437228	1.90324	0.00127584	2.61051	1.3216e-05	chr14.12005933.12006647	2.92889	1.80018e-05	2.14176	2.65264e-05	chr10.53043562.53044647	1.85391	0.00138442	1.79681	4.98002e-05
chr10.97717230.97717604	2.34727	0.00648377	2.70029	0.00346832	chr14.16328360.16329569	2.32787	0.000513265	1.73382	0.00101481	chr10.53175965.53176811	1.98697	6.65321e-05	2.19227	3.27293e-10
chr10.98309582.98310400	1.9031	0.00374027	2.62427	0.000117693	chr14.16897858.16899214	2.03005	0.00167065	1.94436	0.000104351	chr10.53179054.53179336	3.48628	2.49285e-06	1.75707	0.0010664
chr10.98343705.98344501	2.76643	0.000108855	2.06728	0.00265737	chr14.17156174.17157132	2.76728	3.11174e-05	2.13912	2.68255e-05	chr10.53960851.53961647	2.71546	9.47097e-06	2.30853	1.87677e-06
chr10.98485726.98486904	1.52425	0.00602614	2.13241	5.3502e-05	chr14.17923109.17923922	2.28221	0.00182145	1.75652	0.00288799	chr10.54038588.54039304	2.18525	0.000114999	2.28422	1.42211e-07
chr10.98628099.98628670	2.62213	5.90135e-05	3.19491	2.41802e-06	chr14.21368800.21369652	1.4041	0.00788108	1.80704	7.30545e-08	chr10.54090326.54091531	2.21695	0.000183109	1.68497	0.000145504
chr10.98707545.98708130	2.68935	0.00107079	2.08365	0.00726313	chr14.23499302.23499848	1.81711	0.00746243	2.03718	0.000276424	chr10.54172214.54173143	2.0418	0.00043916	2.29208	9.9522e-07
chr10.98775343.98776236	2.40119	9.45822e-05	2.43783	4.28125e-05	chr14.26478194.26478946	2.24717	0.00132042	2.21096	0.000113099	chr10.54188833.54189394	3.22457	8.62164e-07	2.29789	2.26058e-06
chr10.98806585.98807439	1.93088	0.00230317	2.68338	3.80015e-05	chr14.28699717.28700507	2.18053	0.00456202	1.69333	0.00572107	chr10.54271475.54272254	2.00866	0.00366556	1.5278	0.00632172
chr10.99075848.99076978	1.39535	0.00890738	1.97934	9.84404e-05	chr14.29204603.29205349	2.946	2.00443e-06	2.32269	5.81832e-07	chr10.54457260.54458060	2.30709	0.000179984	1.92487	6.3384e-05
chr10.99169482.99170215	2.17667	0.00142452	2.15139	0.000963142	chr14.29539940.29540510	2.70973	0.00125061	2.26912	0.00126116	chr10.54621660.54622350	3.19231	4.14444e-06	2.31043	1.21275e-05
chr10.99396585.99397091	2.61483	0.000147662	3.03566	2.70647e-05	chr14.29656665.29657287	2.08954	0.00770564	1.79784	0.00775776	chr10.54631150.54632112	1.97374	0.00219533	1.61922	0.00127463
chr10.99399675.99400640	2.83875	5.37817e-07	3.1733	2.54152e-08	chr14.35049170.35050409	2.33114	2.35834e-05	1.38827	0.000163424	chr10.55099298.55100261	2.33231	1.07846e-05	1.07943	0.00385286
chr10.99480544.99481079	2.13613	0.00170195	2.35983	0.000475931	chr14.35502461.35503779	1.90641	0.00131297	1.35114	0.0017991	chr10.55186602.55187165	3.77607	8.24056e-06	1.88672	0.00249622
chr10.99857810.99858618	2.03303	0.00281617	2.2716	0.000925109	chr14.36781383.36782240	1.96392	0.0094785	2.34252	0.000469416	chr10.55801524.55802092	2.3386	0.00160102	2.34792	0.000149421
chr10.100263178.100264179	2.55674	0.000145825	2.16378	0.00150495	chr14.37141354.37142286	2.41463	0.00217272	2.17323	0.00102599	chr10.55816688.55817419	1.864	0.00946663	2.09257	0.000472232
chr10.100556420.100557105	1.89959	0.00505432	1.7268	0.00908417	chr14.39264130.39265195	1.91231	0.00154809	2.57244	1.62944e-07	chr10.55819176.55819713	2.47174	0.00265457	1.90754	0.00498474
chr10.101003129.101004175	2.4779	2.5362e-05	2.5538	1.04814e-05	chr14.46574245.46574960	2.10423	0.00439609	2.02357	0.00165809	chr10.55902077.55902907	1.99226	0.00299848	2.35076	7.21129e-05
chr10.101129475.101130038	3.12664	0.000262069	2.97616	0.000733262	chr14.48288375.48289625	1.87148	0.000669535	1.65153	1.4791e-05	chr10.55927571.55928116	2.80776	0.00124384	1.87587	0.00743538
chr10.103601828.103602327	2.45333	0.00871525	3.08466	0.0024473	chr14.48293373.48293911	2.08248	0.000959438	2.45118	5.37332e-06	chr10.56003303.56004249	1.89192	0.000887221	1.44491	0.000678824
chr10.103827123.103827939	2.69136	2.92008e-05	2.54447	4.9428e-05	chr14.54480573.54481386	2.2011	0.00123474	1.91308	0.000370561	chr10.56118660.56119213	3.61835	1.01735e-08	2.25511	1.46136e-06
chr10.104210209.104211186	2.30222	0.000146146	2.56698	1.99675e-05	chr14.54973072.54973455	3.12909	0.000601993	2.32212	0.00241486	chr10.56347498.56348157	2.39907	0.00165299	2.56782	0.000108209
chr10.104386778.104388239	1.74071	0.00489931	1.84886	0.00224199	chr14.55331409.55331863	2.52774	0.004831	2.47548	0.00187335	chr10.56365760.56366185	3.36312	7.1317e-06	2.56689	4.23492e-05
chr10.104410445.104410973	2.76372	0.00162859	2.67862	0.00284989	chr14.57274893.57275950	1.88532	0.0013389	1.16041	0.00834857	chr10.56812230.56813128	2.88827	8.1327e-06	1.3438	0.00377438
chr10.104444721.104445607	1.96996	0.00157419	2.68205	2.30626e-05	chr14.60132614.60133211	2.65566	7.81874e-05	2.05248	0.000101957	chr10.57077978.57078539	1.98097	0.00861881	1.80991	0.0039853
chr10.104482371.104483017	3.37848	1.07882e-05	3.11597	3.56138e-05	chr14.60670219.60670748	1.85791	0.00887523	2.19285	0.000310541	chr10.57607805.57608618	2.12632	0.00242957	1.63769	0.0026714
chr10.105076800.105077514	2.17272	0.00250595	2.33803	0.0012122	chr14.61511161.61511956	2.6896	0.00105683	2.01207	0.00175117	chr10.57619673.57620610	3.05524	2.1247e-05	2.57042	7.52675e-06
chr10.105286086.105286684	2.56358	4.42724e-05	2.18946	0.000288981	chr14.62152309.62153092	1.98315	0.00517863	1.93361	0.000736893	chr10.58632157.58632968	3.84936	1.13577e-11	2.01756	6.49883e-09
chr10.106010002.106010880	2.22429	0.000872985	1.81841	0.00558137	chr14.66090705.66091649	2.05591	0.00419903	2.11652	0.000527311	chr10.58713593.58715252	1.57135	0.00527536	1.10188	0.00465709
chr10.106254099.106254615	1.83588	0.00852363	1.82126	0.00821895	chr14.67125966.67126719	2.32069	0.000155344	1.57604	9.54734e-06	chr10.59265392.59266393	2.16083	0.00236042	1.98019	0.000611434
chr10.106259591.106260679	1.88079	0.00516689	1.82846	0.00660458	chr14.67169062.67170063	2.33552	0.000669535	1.69207	0.00290763	chr10.59520800.59521380	2.26096	0.00428098	2.20633	0.000841939
chr10.106818281.106818778	2.76213	0.000592913	3.54124	7.10957e-05	chr14.71432137.71432871	3.30943	1.33637e-06	1.97771	6.32999e-05	chr10.59558321.59559012	2.1739	0.00265769	2.82509	1.13283e-05
chr10.106838306.106839039	2.25798	0.000971884	2.10023	0.00192231	chr14.74166196.74166800	2.7107	0.000630505	2.05633	0.00343377	chr10.60025358.60025967	3.17048	1.21564e-05	2.41629	2.04404e-05
chr10.106938429.106939282	2.0275	0.000646762	2.52674	1.75686e-05	chr14.74529296.74530062	2.07041	0.00280271	2.2211	0.000116963	chr10.60063066.60063692	2.06724	0.00833351	2.50759	0.000253812
chr10.107159116.107159698	3.18657	8.44359e-05	2.96432	0.000303311	chr14.74610861.74611733	2.49155	6.39378e-05	2.16435	1.24691e-06	chr10.60924151.60925708	2.63829	2.02804e-05	1.74915	5.49703e-05
chr10.107323764.107324360	3.00901	0.000172685	2.67613	0.000518314	chr14.75246033.75247046	1.81749	0.00386677	1.61157	0.000747341	chr10.61059514.61060254	1.99342	0.00815407	2.23148	0.00050725
chr10.108454603.108455318	2.08398	0.000977351	3.13296	3.83257e-06	chr14.75250593.75251268	2.20873	0.00410289	2.17173	0.00111469	chr10.61092709.61093038	2.99192	4.58926e-05	1.84646	0.000742416
chr10.108656652.108657403	1.72101	0.00878859	2.09105	0.00190592	chr14.76239538.76240442	2.34668	0.0008523	1.45029	0.0068021	chr10.61512193.61512980	2.79638	0.000140216	1.92387	0.000850351
chr10.109105812.109106213	2.33379	0.00935775	3.36847	0.00136839	chr14.76328363.76329066	2.64085	0.00158567	1.92555	0.00725294	chr10.62083452.62084573	3.28081	4.18698e-08	2.66726	6.98083e-09
chr10.109757329.109757743	2.37286	0.00148279	2.18782	0.00346699	chr14.76343404.76344093	2.65517	0.000616125	1.66165	0.00835602	chr10.63951514.63951947	2.4578	1.67622e-05	2.1473	6.6565e-07
chr10.110072162.110072760	2.10382	0.00553284	2.99722	0.000160546	chr14.76980651.76981775	2.32631	0.000106482	2.45862	3.96314e-07	chr10.64116782.64117465	2.766	6.91218e-05	2.15356	7.46263e-05
chr10.110563146.110564086	2.5437	0.000349264	3.22221	2.28101e-05	chr14.77593355.77594200	2.32621	0.00164363	1.84528	0.00279966	chr10.64356852.64357555	1.98225	0.00861165	2.02933	0.00143706
chr10.110618886.110619580	2.82397	0.000187968	2.78722	0.000280723	chr14.78121710.78122622	2.57207	3.07981e-05	1.19185	0.00685992	chr10.64904856.64905643	3.82235	5.4286e-08	2.45461	1.60686e-06
chr10.111134418.111134840	2.44186	0.0018261	3.22075	0.000170946	chr14.79054701.79055301	2.55861	0.000163222	1.99418	0.000230199	chr10.65209823.65210186	2.76811	0.00112206	1.95832	0.00459388
chr10.111252539.111253081	1.96216	0.00539004	2.45011	0.000825678	chr14.79239171.79240029	1.89012	0.00107678	2.58147	1.74977e-08	chr10.65281301.65282056	2.81947	2.04064e-05	3.24704	1.00083e-08
chr10.111394115.111395164	1.8222	0.00212752	2.68814	7.1834e-06	chr14.79672762.79674041	1.68586	0.0043282	3.30622	7.20251e-22	chr10.65478137.65478556	2.86019	0.000866816	1.87205	0.00809689
chr10.112483975.112485065	1.59128	0.00693124	2.63879	6.27501e-06	chr14.80446234.80447061	1.65258	0.00916407	2.03281	7.04918e-05	chr10.65860927.65861552	2.49326	0.00057125	1.91737	0.00101941
chr10.112521255.112522095	1.77992	0.00104733	1.57795	0.00243792	chr14.80458998.80460079	2.20676	0.00130651	1.90632	0.000670222	chr10.65895368.65895849	3.5748	3.10158e-08	2.93781	4.44776e-09
chr10.112753240.112754287	2.14281	0.000509901	2.11509	0.000662107	chr14.80556092.80557051	2.30522	0.000369653	1.81626	0.000324603	chr10.65978686.65979367	3.38146	2.02735e-07	2.8312	1.99257e-08
chr10.113074260.113075268	2.00832	0.00740855	2.2271	0.0041404	chr14.80564657.80566020	2.04711	0.000652385	2.01746	6.88071e-06	chr10.66186767.66187674	3.1651	9.09211e-08	1.99312	9.24041e-06
chr10.113075798.113076321	2.63258	0.000523974	2.48382	0.00115128	chr14.80643184.80644694	2.82618	3.36143e-07	1.28225	0.000226157	chr10.66229109.66229798	2.13927	0.00120701	2.01434	0.00015981
chr10.114041792.114042448	2.6341	0.000497263	2.6411	0.000635951	chr14.80648336.80648774	2.1407	0.00843131	2.19138	0.00278291	chr10.66288808.66289605	3.31733	7.3713e-07	2.15232	1.80791e-05
chr10.114463097.114464047	2.58017	0.000299386	2.51139	0.000520313	chr14.80722792.80723576	4.45107	1.10885e-12	1.56093	1.34091e-05	chr10.66984114.66984961	4.7491	2.98542e-13	2.8761	3.33099e-12
chr10.114643096.114643867	2.15972	0.000669535	2.05074	0.000773145	chr14.83958884.83959695	2.38191	0.000244627	3.29439	2.93856e-10	chr10.68142374.68143051	1.97579	0.00133862	2.17644	1.80084e-05
chr10.114737505.114738166	1.89419	0.00354037	2.8146	1.76041e-05	chr14.85398263.85399080	1.94611	0.00203217	2.41304	3.61657e-06	chr10.68928816.68929153	3.05201	0.000711343	2.182	0.002992
chr10.114809396.114809877	2.89663	9.33783e-05	3.09768	7.71013e-05	chr14.86150290.86150975	3.1155	4.78522e-06	2.26473	1.55126e-05	chr10.68933652.68934589	2.98666	6.2095e-07	2.5014	1.43711e-07
chr10.114840188.114842358	2.00042	0.000225045	2.23909	1.66031e-05	chr14.86262818.86263564	2.86703	1.83799e-05	2.86562	1.4176e-07	chr10.69020282.69021635	1.54315	0.00647558	1.17754	0.00296986
chr10.114897741.114898298	2.19897	0.00653799	2.31298	0.00508132	chr14.87861238.87861852	2.12266	0.00202512	1.72336	0.00184822	chr10.69597439.69597894	2.31125	0.000328542	1.77724	0.000373854
chr10.114901441.114902165	2.88735	0.000176157	2.629	0.00125197	chr14.88391147.88391935	2.58497	0.000626308	2.32192	0.00031345	chr10.69606624.69607049	3.30166	7.26466e-06	1.80205	0.000997476
chr10.114924524.114925779	2.57878	7.13544e-05	2.3866	0.000380289	chr14.88843390.88844643	2.03566	0.00151424	1.48632	0.00274179	chr10.69862731.69863356	1.91043	0.000463544	2.19141	3.86122e-09
chr10.114956165.114956929	2.46573	0.000126527	2.28608	0.000262246	chr14.89447253.89448354	2.27795	0.000595153	1.74132	0.000795113	chr10.70152798.70153367	2.09098	0.000867687	2.17941	2.30056e-05
chr10.114964859.114965779	2.39686	0.000849319	1.95261	0.00544211	chr14.90881632.90882727	2.00314	0.00194892	1.82194	0.000376132	chr10.70244556.70246030	1.40516	0.00567136	1.10989	9.75466e-05
chr10.114972030.114972834	3.06883	1.19801e-05	3.15531	3.31079e-05	chr14.92786157.92786723	2.69541	0.00203217	2.64071	0.000685546	chr10.70301534.70301837	3.06346	0.000658868	2.0819	0.00375317
chr10.115515183.115516196	2.02515	0.00230258	2.52951	0.000230981	chr14.94592624.94593508	2.3133	0.000625741	1.83058	0.001397	chr10.70366555.70366952	3.75303	3.8805e-06	2.60696	2.00273e-05
chr10.115957698.115958461	2.1667	0.0029392	2.48152	0.00130454	chr14.96782711.96783674	2.83394	5.19435e-06	1.20308	0.00453259	chr10.70826742.70827232	3.59985	1.56342e-07	1.5275	0.00120293
chr10.116291187.116291878	2.21042	0.000288052	2.48429	3.72014e-05	chr14.97863902.97865066	3.23772	1.02307e-09	2.47595	1.27356e-13	chr10.70828018.70828533	3.41429	4.22681e-07	3.09546	1.02992e-08
chr10.116402796.116403413	1.80885	0.00826636	1.78644	0.00715863	chr14.98072448.98074272	1.68097	0.00497308	1.13709	0.00546055	chr10.70947436.70947889	2.90064	0.000207195	1.98365	0.00149673
chr10.116405005.116405387	3.34075	7.21587e-06	2.45647	0.000287064	chr14.98083372.98084078	3.07186	2.2598e-05	1.58795	0.00208305	chr10.70964541.70965074	1.99862	0.00391569	2.39263	6.32513e-05
chr10.116427766.116428786	2.24313	0.000284314	2.00558	0.00196369	chr14.98533689.98535668	2.13034	0.000309243	1.30361	0.000626751	chr10.71011111.71012069	3.40156	2.83369e-06	2.47598	7.1559e-06
chr10.116486964.116487711	1.87952	0.00677878	2.28044	0.00122657	chr14.99453642.99454494	2.77636	3.33903e-07	2.02344	1.95704e-09	chr10.71767650.71768386	2.04233	0.00841075	1.81534	0.00535595
chr10.116653378.116653959	2.2825	0.00150158	2.67736	0.000535319	chr14.99681972.99682639	2.25336	0.00150824	1.61284	0.00546921	chr10.72276931.72277199	3.27869	0.00055701	2.38212	0.00209279
chr10.116788174.116788895	2.83847	6.72081e-05	2.03179	0.00176507	chr14.99730083.99730737	2.38344	0.000831956	2.30488	0.000123493	chr10.72298848.72299275	2.68653	0.00171848	2.0143	0.00414988
chr10.116931146.116932074	2.16088	0.000867711	2.0894	0.000700404	chr14.100816619.100817492	2.0693	0.00999833	2.09712	0.00278795	chr10.72971807.72972551	2.79587	8.66995e-05	1.82705	0.000930318
chr10.117343270.117343917	2.25957	0.00154547	1.81662	0.00764053	chr14.100922735.100924002	1.68917	0.00723961	1.68725	0.00056967	chr10.73086025.73087292	1.81302	0.000763006	1.34819	0.000108273
chr10.117360157.117360610	2.44758	0.00214723	2.60157	0.00217924	chr14.101106470.101107100	2.90144	4.35301e-05	1.92007	0.000473069	chr10.73180075.73181273	2.20939	0.00051253	2.12805	0.000146509
chr10.117874744.117875769	2.53179	0.000109828	2.77211	3.79189e-05	chr14.101527243.101527987	1.83053	0.0034969	2.50805	7.2757e-07	chr10.73280406.73281415	3.09081	7.89767e-09	1.1222	0.000859298
chr10.117878684.117878954	2.36022	0.00489695	2.88799	0.00132858	chr14.101587507.101588514	1.97709	0.00147487	1.6224	0.000321618	chr10.74005432.74006121	2.84844	2.80946e-05	2.38886	2.04012e-05
chr10.117984589.117985506	2.93822	3.23188e-05	2.49618	0.000462165	chr14.102019708.102020773	2.23227	0.000553335	1.65972	0.000627702	chr10.74250297.74251268	2.83897	1.9887e-07	1.8441	1.11402e-06
chr10.118161066.118161699	2.60124	0.000171995	2.80563	8.95145e-05	chr14.102047322.102048168	2.62747	2.64441e-05	1.84177	4.88947e-05	chr10.74675742.74676553	2.83929	4.44983e-05	1.7563	0.00132741
chr10.118470235.118471071	2.30831	0.000384245	2.1178	0.000892202	chr14.102439433.102440334	3.04818	2.24707e-06	1.75941	7.21538e-05	chr10.77550014.77550483	2.63069	0.00164168	2.89501	2.34471e-05
chr10.118478973.118479786	1.714	0.00619317	2.93317	9.96308e-06	chr14.102673326.102674434	2.10268	0.000799355	1.51254	0.00123083	chr10.78432891.78433532	3.44881	2.24056e-07	3.02092	1.47144e-08
chr10.118643661.118644339	2.72199	0.000239944	2.31778	0.00113076	chr14.105783175.105783859	1.77633	0.00311254	2.15502	5.06093e-06	chr10.82974512.82975531	2.77298	6.21768e-07	2.28703	1.29887e-08
chr10.118699176.118699748	2.23786	0.00152348	2.67571	0.000243376	chr14.105790284.105790828	2.09053	0.00038698	3.17358	1.34123e-10	chr10.83609595.83610651	2.41519	1.19177e-05	2.23902	2.66703e-08
chr10.118743712.118744210	3.16243	4.31078e-06	2.61733	7.75437e-05	chr14.105804816.105806183	1.83688	0.000901993	2.16175	1.11395e-07	chr10.84516173.84516748	1.80758	0.00964849	1.76597	0.002075
chr10.119013549.119014375	1.62785	0.00301813	2.47982	5.3626e-06	chr14.105875873.105877508	1.74022	0.00240872	1.78923	2.08562e-05	chr10.84690834.84691709	2.84932	5.20154e-05	1.57201	0.0032903
chr10.119025606.119026721	2.58364	0.000158367	1.90061	0.00160144	chr14.105979523.105980623	1.58305	0.00732234	1.69005	4.0402e-06	chr10.84802916.84804535	2.8104	1.02594e-07	1.84853	7.49718e-07
chr10.119031694.119032459	3.05398	2.67067e-06	2.9921	3.76964e-06	chr14.107297181.107298505	2.26911	0.000229366	1.63291	0.000377952	chr10.85278543.85279685	2.24783	4.49006e-05	2.5253	2.04112e-08
chr10.119547642.119548278	2.14877	0.00090637	3.16302	2.98071e-06	chr14.108888092.108888935	2.46478	0.000122879	1.55411	0.00104419	chr10.85287690.85288575	3.09693	0.000142427	1.77946	0.00365228
chr10.120164924.120165876	2.85185	0.000197206	2.60387	0.00027243	chr14.110560658.110562074	2.55734	1.31735e-05	2.08288	2.16538e-06	chr10.85428847.85429621	3.17887	3.6918e-07	2.38845	2.83813e-07
chr10.120600580.120601138	3.01229	0.000566305	2.25897	0.0089708	chr14.110956774.110957446	2.09376	0.00776628	1.92951	0.00307618	chr10.85479955.85480726	2.53236	1.72039e-05	1.9748	5.39991e-06
chr10.120851147.120852086	2.32174	0.00128394	2.82455	0.000121092	chr14.111746991.111748052	2.11858	0.00124651	1.81771	0.000423408	chr10.85525363.85526802	1.48216	0.00339	1.82329	4.96336e-07
chr10.120900264.120900809	2.63904	0.00115369	2.52888	0.00314651	chr14.111850295.111851122	1.9755	0.00209832	1.24756	0.0089842	chr10.86305313.86305816	3.23605	5.24784e-06	1.78055	0.000594666
chr10.121263116.121264268	1.6623	0.000712448	2.92457	1.44614e-09	chr14.114367295.114368208	2.42333	0.000208019	1.72986	0.000624357	chr10.86363045.86363598	3.05128	0.000344113	1.81861	0.00533616
chr10.121280676.121281348	1.81331	0.000838929	2.8105	2.75008e-07	chr14.114664601.114665308	2.02092	0.00216268	1.86523	0.000422972	chr10.86397423.86398624	3.10261	2.06098e-07	1.5969	0.000185543
chr10.121427943.121428897	1.75351	0.00110303	2.92895	1.56779e-07	chr14.114766797.114768023	3.42735	1.62253e-10	1.00058	0.00080502	chr10.86410302.86411381	2.91905	2.2826e-06	1.57621	0.000374901
chr10.121472739.121473266	1.46487	0.00997119	2.88065	1.09945e-06	chr14.114808345.114809391	2.45314	6.08683e-05	2.38584	1.71902e-06	chr10.86427472.86428185	3.54932	6.34156e-08	2.78029	1.64678e-08
chr10.122569101.122570159	1.69329	0.00808648	2.27268	0.00117934	chr14.116972657.116973358	2.30625	0.000516452	1.8891	0.000281775	chr10.86761523.86762497	1.9052	0.0052243	1.8596	0.00113485
chr10.122879173.122879764	2.98351	3.72107e-05	2.8742	5.58781e-05	chr14.117345872.117347004	3.17295	1.17893e-07	1.49051	0.000102969	chr10.86871903.86873063	1.41958	0.00406907	2.49173	5.83924e-11
chr10.122990019.122990358	1.90225	0.00459284	2.8612	7.93722e-05	chr14.117599315.117600406	1.64053	0.00972372	1.75803	0.00024989	chr10.86880101.86881033	1.98383	0.000724425	1.7884	7.09935e-05
chr10.123144201.123144775	1.94821	0.00192015	2.04707	0.000940794	chr14.117693927.117695103	1.79821	0.00335881	2.12249	1.69152e-05	chr10.87265784.87266434	3.27988	2.83369e-06	2.52845	3.9977e-06
chr10.123426642.123427424	1.70665	0.00896521	1.99036	0.00214108	chr14.118612702.118613537	2.35463	0.000287507	1.84391	0.000527791	chr10.87464008.87464721	3.11266	0.000100237	2.4341	4.10982e-05
chr10.124208160.124208866	1.87406	0.00608355	2.21553	0.0013587	chr14.119453220.119453917	2.20864	0.00631927	1.78729	0.00922967	chr10.87855678.87856169	2.55518	7.04866e-06	1.50391	0.000208473
chr10.124370728.124371538	2.24782	0.00173812	2.94514	0.00011928	chr14.121219309.121219960	1.81138	0.00820213	1.45124	0.00844635	chr10.87872326.87873261	2.76249	6.49554e-05	1.59356	0.00290429
chr10.125068169.125068558	2.20213	0.00536177	2.73542	0.00110777	chr14.121251790.121252136	2.09906	0.00492621	1.50873	0.00886887	chr10.87923658.87924203	3.12226	5.77662e-05	2.08666	0.000531082
chr10.125899451.125899863	2.18799	0.0051491	2.56659	0.00177354	chr14.121528101.121528632	3.00042	0.00012266	1.83351	0.00166289	chr10.88060507.88061370	3.26989	7.25084e-05	2.05504	0.000857754
chr10.126259455.126260085	2.14915	0.00221028	2.2306	0.00221691	chr14.122800188.122800823	2.13463	0.00385869	1.66395	0.00599495	chr10.88166629.88167305	2.23847	0.000252209	1.96516	4.68948e-05
chr10.126664472.126665175	2.11378	0.00469451	1.92792	0.00887757	chr14.123495359.123496673	2.19255	0.00164155	1.66175	0.00282265	chr10.88227297.88228231	2.77959	8.84571e-06	2.41736	1.60798e-06
chr10.126748585.126749386	2.6352	0.00049165	2.03572	0.00417159	chr15.3433255.3433915	2.15	0.00330275	2.08788	0.000752092	chr10.88505270.88505690	3.3333	9.11655e-08	3.20485	3.20135e-10
chr10.126815014.126816543	2.36228	0.00012266	2.68344	2.16098e-05	chr15.4136700.4137269	2.93168	0.000173755	2.49281	0.000138506	chr10.89531153.89531687	3.34476	2.10925e-08	1.60167	6.47137e-05
chr10.126931398.126932001	1.69112	0.00202687	3.02215	7.80398e-08	chr15.5338996.5339733	2.52162	0.000510604	2.25413	0.000205148	chr10.89641430.89642004	2.44105	0.00100788	1.69268	0.0046577
chr10.127353982.127355243	1.6429	0.0012003	3.5652	3.64627e-10	chr15.6670054.6670972	3.02075	7.80979e-06	2.60224	1.39573e-06	chr10.89863957.89864276	2.89805	0.00260272	2.17448	0.00541695
chr10.128028741.128029287	3.03746	0.000371243	3.07325	0.000455633	chr15.6966243.6966955	2.4018	0.00274664	2.51389	0.000342462	chr10.90213214.90213973	3.23545	3.27757e-08	1.14446	0.00336869
chr10.128759337.128759903	2.9684	0.000721669	3.09119	0.000795005	chr15.7809819.7811002	2.1515	2.43862e-05	1.1618	7.55636e-05	chr10.90317770.90318158	2.71029	0.000540955	2.65485	9.89015e-05
chr10.128952088.128953060	2.9771	1.76327e-05	2.83984	0.000104503	chr15.7811293.7812061	2.42252	0.000137443	1.93297	5.02318e-05	chr10.91322360.91323074	2.16868	0.00549935	1.81947	0.0053337
chr11.3741063.3741893	2.8601	5.81497e-05	3.64608	1.11406e-06	chr15.7823929.7824462	2.64372	0.000661073	1.9658	0.00221899	chr10.91447973.91448708	2.96302	5.65027e-05	2.38293	5.04002e-05
chr11.4027594.4028367	2.84458	0.000259599	4.26538	5.72569e-06	chr15.7857154.7857882	2.52105	0.000172685	2.18885	5.0122e-05	chr10.91494471.91495027	2.36015	0.0034612	1.73305	0.00874529
chr11.5960092.5960493	2.6329	0.00143684	3.35379	7.8225e-05	chr15.8302728.8303545	3.27532	2.00343e-08	2.67615	1.34123e-10	chr10.91750262.91751000	2.48991	0.00115273	1.91015	0.00083226
chr11.6078317.6079406	2.12307	0.00182501	2.81596	4.02176e-05	chr15.8663119.8664149	1.54845	0.00484996	1.7258	8.36092e-07	chr10.91983671.91984580	2.51188	5.97355e-05	2.43219	4.49957e-06
chr11.6898922.6899886	1.93435	0.00542608	1.83526	0.00732639	chr15.10393105.10393878	2.67422	3.16538e-05	1.93819	7.04589e-05	chr10.92056325.92057156	2.40976	0.0010275	1.67029	0.0052582
chr11.7198731.7199163	2.23477	0.00796334	2.54113	0.00340563	chr15.10986140.10986838	1.93085	0.00161005	1.78405	0.000172669	chr10.92080039.92080947	2.657	3.66791e-05	1.94403	0.000201549
chr11.7583168.7583983	2.55384	0.00062556	2.5129	0.000951721	chr15.11076096.11076711	2.61521	5.76826e-05	1.55742	0.00118828	chr10.92096077.92096692	2.46131	0.000711184	2.28757	0.000191928
chr11.7705199.7706009	2.0656	0.000374433	2.98677	6.88727e-07	chr15.11685620.11686424	2.49549	1.87455e-05	2.22437	3.85638e-07	chr10.92142455.92143435	3.37197	2.05415e-09	2.36408	3.66573e-09
chr11.7931047.7931783	2.47216	0.000113068	2.57959	5.16598e-05	chr15.12635866.12636373	2.08462	0.00195267	1.38807	0.00957843	chr10.92164665.92165458	2.80422	5.89301e-07	2.3089	0.00169226
chr11.9038909.9040349	1.95728	0.0014456	2.98928	1.93394e-06	chr15.12728305.12728839	2.04763	0.000331938	2.30595	8.38517e-08	chr10.92695606.92696670	2.05277	0.001138	1.69832	0.00172332
chr11.9128011.9128763	2.04651	0.00658288	2.14613	0.00493237	chr15.12814209.12815297	3.36624	5.99501e-08	2.48625	2.29748e-08	chr10.92717901.92718756	3.61428	1.17473e-09	1.197	0.0014132
chr11.9294513.9295120	2.31278	0.00437092	2.85862	0.000951052	chr15.12925636.12926734	2.4789	6.96162e-05	1.87405	4.65635e-05	chr10.93062080.93062948	2.40078	0.000244813	2.31423	4.63962e-06
chr11.10310424.10311288	2.03747	0.00301743	2.02969	0.00291067	chr15.12991717.12992646	1.80889	0.00936544	1.58023	0.00497534	chr10.93499025.93499811	2.4845	0.00138735	2.11313	0.00151267
chr11.12251124.12251726	2.32766	0.000606912	2.26033	0.000733077	chr15.13318735.13319727	2.59828	4.64699e-05	1.47494	0.00157849	chr10.94005180.94005888	2.42639	0.00051798	1.72535	0.00184111
chr11.12843250.12844242	1.51064	0.00494692	2.26771	7.81499e-06	chr15.13562856.13563479	2.33518	0.00256375	1.91995	0.0040787	chr10.94485984.94487043	2.7066	6.23426e-06	2.0674	1.23513e-05
chr11.13032514.13033184	2.09794	0.00433555	2.91947	0.000241276	chr15.13668110.13669155	1.73645	0.00266003	1.18411	0.00387293	chr10.94549514.94550514	2.24185	0.00187073	1.65292	0.00653045
chr11.13577018.13577831	3.24504	1.57924e-06	2.98893	6.99584e-06	chr15.13913905.13914628	2.49582	0.00011173	2.42388	3.35392e-06	chr10.94569253.94569999	3.49551	2.68274e-08	2.47307	8.74338e-08
chr11.16522589.16523191	2.01585	0.00907631	2.68417	0.00125726	chr15.14052823.14053813	2.84797	1.66577e-06	2.47904	3.55851e-08	chr10.94868245.94869303	2.04633	0.000670798	1.96686	3.58724e-05
chr11.16596710.16597635	2.25196	0.000162471	2.60789	6.26251e-06	chr15.14311545.14312409	2.25249	0.00159422	1.57743	0.00545619	chr10.95045416.95045762	2.29416	0.0082088	2.34454	0.00104703
chr11.17112260.17113119	1.79012	0.00900462	2.48222	0.000555849	chr15.15732656.15733862	2.41456	0.000128039	1.78923	0.000169546	chr10.95090588.95091205	2.90626	2.38582e-06	2.38485	1.78879e-06
chr11.17591436.17592282	2.59988	0.000146804	2.37918	0.000351784	chr15.17291827.17292882	2.04688	0.00251635	1.84719	0.000832237	chr10.95295322.95295953	2.37906	0.000515163	2.32678	3.85876e-05
chr11.17608260.17608924	1.95226	0.00627324	2.87443	0.000191328	chr15.18135838.18136658	1.84086	0.00940726	1.59361	0.00605356	chr10.95385435.95386158	3.06454	4.2386e-05	3.27156	3.59092e-07
chr11.19899017.19900167	2.65608	1.68695e-05	2.92993	2.04073e-06	chr15.20667296.20668386	1.58563	0.00932664	1.37557	0.000787651	chr10.95901633.95902441	2.2095	0.00213428	1.97645	0.001841
chr11.20116051.20116425	2.61048	0.000307773	2.69776	0.000244755	chr15.21695277.21696079	2.73077	4.44006e-05	2.12704	1.18868e-05	chr10.96031442.96031819	2.01475	0.00582397	1.62633	0.00374662
chr11.20307249.20307815	2.02291	0.00242139	2.21238	0.00114028	chr15.22416796.22417469	2.85592	0.000108371	1.72439	0.00386051	chr10.96285521.96286523	2.32786	5.23969e-05	2.31972	8.24964e-07
chr11.20664745.20665373	1.78858	0.00791485	1.95271	0.00331541	chr15.23842726.23843615	2.40069	0.0012244	2.18572	0.000388901	chr10.96364987.96365667	2.90426	6.50074e-05	2.29642	9.24179e-05
chr11.21149193.21149923	2.76857	0.000262255	2.34827	0.00198991	chr15.23924941.23926254	2.41461	2.06145e-05	1.38922	0.000161848	chr10.96779368.96779945	3.2091	1.8571e-07	2.32777	1.07645e-06
chr11.21448506.21448924	2.64307	0.00171446	3.16263	0.000413493	chr15.24004604.24005467	2.68058	3.40653e-06	2.28291	5.10427e-08	chr10.96909404.96910361	2.22869	0.000437253	2.51516	1.33421e-06
chr11.21544915.21546144	2.00486	0.00119186	2.14071	0.000459717	chr15.24341776.24342583	1.99908	0.00700037	2.24486	0.000339269	chr10.96991215.96992070	3.00986	4.46802e-06	1.92102	7.99284e-05
chr11.21688382.21688998	2.52989	0.00056288	1.8809	0.00949725	chr15.24866344.24867318	2.31959	0.00163744	1.76895	0.00183832	chr10.97046548.97047101	2.54923	0.00281337	1.83672	0.00675953
chr11.21846570.21847692	1.77362	0.00594344	2.1361	0.000936455	chr15.25301451.25302321	2.17963	0.00134104	1.9001	0.000553939	chr10.97114302.97115550	2.03193	0.000787998	1.46938	0.00255618
chr11.22353313.22354702	1.77993	0.00215631	2.29024	7.00977e-05	chr15.25509525.25510762	1.41221	0.00603502	2.28075	4.53956e-13	chr10.97237589.97238351	3.93069	3.24141e-09	2.57083	3.2179e-08
chr11.23074505.23075256	1.73972	0.00286606	2.86596	2.26966e-06	chr15.25673209.25673694	3.42222	1.76042e-06	2.64702	1.7318e-07	chr10.97509285.97510109	2.33382	0.00124653	2.01326	0.000561165
chr11.23682367.23682865	2.89698	7.34089e-05	3.40709	1.2397e-05	chr15.26456848.26457718	2.78327	6.52648e-05	1.76435	0.00101239	chr10.97656554.97657282	2.43524	0.000214997	1.55174	0.00205281
chr11.23735103.23736558	1.48051	0.00708004	1.57653	0.00239436	chr15.27378484.27379473	2.82216	5.989e-06	2.11489	5.51998e-06	chr10.98069837.98070166	3.2569	0.000734661	2.29699	0.00375466
chr11.23977856.23978692	1.69815	0.00547553	1.63398	0.00712605	chr15.27556201.27556778	2.02053	0.00125305	1.79974	0.000134551	chr10.98449062.98449786	2.34364	0.00380132	1.83142	0.00455934
chr11.24467012.24468278	1.7539	0.0079244	1.79145	0.00595777	chr15.27672147.27672972	1.88683	0.00403784	1.4995	0.00212396	chr10.99077777.99078372	2.80079	0.000244813	1.88637	0.00281978
chr11.24483598.24484664	1.64741	0.00698987	1.89654	0.00224671	chr15.27698895.27699368	2.23416	0.00536177	2.44278	0.000598378	chr10.99330364.99331481	2.19171	0.000297501	1.33832	0.00359998
chr11.24537517.24538299	2.42424	0.000141988	2.27118	0.000305689	chr15.28872919.28873569	2.43266	0.000254599	2.09603	8.72235e-05	chr10.99335978.99336679	3.02857	5.60424e-05	2.66923	2.82349e-05
chr11.25310574.25311329	2.01037	0.00354232	2.1535	0.00139163	chr15.31434306.31435097	2.66438	3.50817e-05	2.11319	1.37846e-05	chr10.99799433.99800159	3.31459	7.97633e-06	2.95481	1.57742e-06
chr11.25359616.25360166	3.04633	3.56884e-05	2.43127	0.00121888	chr15.31741671.31742425	3.08004	4.07686e-07	2.03057	2.34028e-06	chr10.99863303.99864348	3.62464	4.88259e-09	2.75725	3.27293e-10
chr11.25736876.25737993	2.13368	0.000185223	1.52358	0.00486225	chr15.32198179.32199263	3.459	2.53771e-07	2.05438	9.57308e-06	chr10.99991795.99992451	3.42614	3.97258e-06	2.19701	5.62411e-05
chr11.26176612.26177139	2.10305	0.00975029	2.48997	0.00189701	chr15.32355685.32356415	2.11081	0.00112616	2.03363	5.81838e-05	chr10.100771233.100772310	2.12611	0.000758551	1.6055	0.00120196
chr11.26229432.26230298	2.81395	0.000282908	2.2547	0.00316077	chr15.33668969.33669577	2.18866	0.000551256	2.60507	2.73558e-07	chr10.101144580.101145526	3.02179	7.26347e-06	2.54648	3.06746e-06
chr11.26596986.26597485	2.17662	0.00423623	3.63988	4.19847e-05	chr15.33914200.33915589	2.12715	0.000180236	1.25491	0.00190253	chr10.101218990.101219777	2.50441	6.93857e-05	1.75382	0.000271268
chr11.26597640.26598122	2.42852	0.000229366	2.93718	1.80266e-05	chr15.35928198.35928924	1.49805	0.0097285	1.52431	0.000103916	chr10.101260445.101261225	2.14901	0.00318279	1.69796	0.00426791
chr11.26600543.26601140	2.15139	0.0015569	2.26731	0.000792005	chr15.41920084.41920720	1.95691	0.00928515	1.82138	0.00385985	chr10.101393401.101394170	2.82672	9.84404e-05	2.13333	0.00028109
chr11.26608635.26609504	2.03594	0.00112976	2.32292	0.000189626	chr15.44570482.44571260	2.31572	0.000977351	1.87163	0.00118019	chr10.101429219.101430169	3.13072	2.58731e-06	2.52428	6.2172e-07
chr11.26972217.26973352	1.98626	0.00120587	2.25865	0.000262246	chr15.44590637.44591729	2.88961	2.80477e-07	2.26992	2.40687e-08	chr10.101473023.101473989	2.96836	3.40807e-06	2.07972	2.03981e-05
chr11.27459987.27460322	3.04647	0.00113304	2.644	0.00453898	chr15.45471887.45472556	3.13355	4.69579e-05	2.00751	0.00114769	chr10.101489827.101491005	1.79035	0.00270615	1.21616	0.0080974
chr11.28255949.28257251	2.67443	2.17037e-05	2.32641	0.000169216	chr15.47167771.47168415	2.55874	0.00417526	2.2585	0.00395654	chr10.101896055.101896811	2.60122	0.000139738	1.97428	0.000172016
chr11.28670617.28671470	1.83859	0.00366412	2.44257	0.000204498	chr15.47337811.47338916	2.48274	0.00033372	1.88321	0.000610137	chr10.102238499.102239166	2.52609	0.000722838	2.03346	0.00101279
chr11.30102325.30103434	1.50911	0.00562162	2.02934	0.000176278	chr15.48548259.48548981	3.0703	4.8291e-06	2.03579	4.69449e-05	chr10.102369375.102369835	2.40912	0.00386251	1.86599	0.00705962
chr11.30433191.30433834	2.85427	0.000271747	2.20958	0.00404427	chr15.50384999.50385890	1.67684	0.00647361	2.93615	5.07297e-11	chr10.102929480.102930245	2.84779	3.90426e-06	2.03262	1.13675e-05
chr11.31683926.31684796	2.37164	9.19636e-05	2.9584	7.15557e-07	chr15.50665143.50666684	1.46743	0.00789368	1.14253	0.000931021	chr10.103300663.103301416	2.94734	0.000102945	1.70082	0.00365027
chr11.32231135.32231627	2.04857	0.00474903	2.332	0.00181732	chr15.50720260.50720818	2.32077	0.00487985	2.89303	0.00012849	chr10.103305248.103305734	3.7886	3.40002e-06	2.29457	3.94989e-05
chr11.32243198.32244246	1.64105	0.00804376	2.43107	8.90114e-05	chr15.50822106.50822956	2.28817	0.000103057	2.52907	6.78998e-11	chr10.103398375.103398978	2.14045	0.000646857	1.77141	0.000341812
chr11.32402371.32403309	2.5673	8.28138e-05	2.38848	0.000245018	chr15.51356396.51357502	2.05788	0.00244701	1.32512	0.00975205	chr10.104303541.104304475	2.09042	0.000997133	2.04284	6.79214e-05
chr11.32471799.32472335	2.71491	0.000227558	2.05675	0.00575383	chr15.52176680.52177839	2.8398	7.65501e-07	1.9071	1.51395e-06	chr10.104385482.104386104	2.22047	0.00226284	1.75982	0.00481673
chr11.32998846.32999751	2.04173	0.000401463	1.95298	0.00048705	chr15.52405810.52406945	1.54667	0.00589213	1.55279	1.72872e-05	chr10.105225629.105226387	1.94249	0.00219466	1.33487	0.00925172
chr11.33221675.33222456	2.30771	0.000393009	2.75645	4.86818e-05	chr15.52423224.52423894	2.77812	6.0891e-05	2.31465	2.7874e-05	chr10.105374226.105374849	1.95862	0.00692259	1.91152	0.00158099
chr11.33627052.33627967	2.16177	0.000394369	2.62536	2.31881e-05	chr15.52755097.52756103	1.53985	0.00758093	2.43645	1.32743e-10	chr10.105459940.105461498	1.91447	9.75867e-05	2.1599	2.52497e-08
chr11.34033790.34034606	2.15704	0.00135229	2.2893	0.000345431	chr15.53063426.53064070	1.80455	0.00319984	1.69859	0.000173805	chr10.105509129.105510624	1.99835	0.000184738	1.17779	0.00246047
chr11.34083723.34084880	1.92385	0.00217304	1.81524	0.00398904	chr15.53514130.53514835	2.42218	0.000513664	2.11423	0.000219377	chr10.105541712.105542248	2.33836	0.000293226	1.4564	0.00325574
chr11.34258657.34259509	1.66064	0.00972664	2.53004	0.000227081	chr15.55174137.55174878	1.89747	0.00841653	1.98125	0.00107129	chr10.105662851.105663467	4.7528	4.84873e-13	1.92835	2.52038e-07
chr11.35193851.35194509	2.76402	3.52736e-05	2.86613	3.22853e-05	chr15.55231159.55231967	2.25094	0.00127008	2.02047	0.000111145	chr10.105665784.105666432	1.86861	0.00162979	2.88047	2.16256e-08
chr11.35378807.35379891	1.81848	0.00274188	1.76815	0.00271922	chr15.55355723.55356622	2.74847	2.87012e-05	1.28814	0.00714451	chr10.105741349.105742362	2.64818	9.5611e-06	1.21644	0.00499495
chr11.35668124.35669048	2.05335	0.000426385	1.59496	0.00426412	chr15.55385365.55386104	2.81294	2.05385e-05	1.65271	0.00059996	chr10.105860756.105861654	1.91306	0.000362053	1.32069	0.000571258
chr11.35679592.35680537	1.66102	0.00652916	2.80678	1.06023e-05	chr15.55747079.55747859	2.27882	0.000977351	2.17265	0.000147839	chr10.106528422.106529332	3.44224	1.46252e-09	2.13636	1.50521e-09
chr11.35684653.35684959	2.50833	0.00251408	2.87578	0.00094243	chr15.56013790.56014630	4.20022	3.6484e-13	3.2224	3.70106e-15	chr10.106621983.106622739	2.62567	0.000169091	1.57902	0.00381633
chr11.35756450.35757434	1.51414	0.00949293	3.16403	6.21768e-07	chr15.57669287.57670316	2.40306	0.000231883	2.1488	3.18633e-05	chr10.107079684.107080346	2.94015	0.00025732	1.96968	0.00199729
chr11.35863657.35864333	1.53336	0.00533699	2.47586	7.62535e-06	chr15.57819691.57820387	2.48441	0.000161413	1.85294	0.000262324	chr10.107115049.107115667	2.54072	0.00032363	2.66217	1.95737e-05
chr11.35930588.35931141	2.36705	0.00123877	2.80572	0.000255346	chr15.58429510.58430161	1.84334	0.00930399	1.5703	0.00702786	chr10.107165113.107165995	3.2657	1.6601e-06	2.12251	1.43106e-05
chr11.36187363.36187896	3.073	0.000116446	2.69227	0.000836738	chr15.59882026.59882990	2.97528	9.08011e-07	2.44223	3.24091e-07	chr10.107181349.107181922	2.74906	0.000606535	1.85331	0.00493111
chr11.38069596.38070023	2.6768	0.000467317	2.67512	0.000702647	chr15.63083997.63084624	3.92458	3.22283e-08	3.24956	2.15203e-09	chr10.107341739.107342653	3.39928	1.59098e-08	2.16085	2.08339e-07
chr11.38673535.38674369	2.23703	0.00176487	2.86036	0.000193086	chr15.63169585.63170835	1.6662	0.00604976	1.02632	0.00809487	chr10.107664062.107664786	2.47275	0.000442751	1.5575	0.00505141
chr11.38770370.38771392	2.86396	1.92428e-06	2.62593	7.04399e-06	chr15.63258047.63258910	2.89096	3.17804e-05	2.17467	3.5729e-05	chr10.107824263.107825370	3.83008	3.70831e-10	2.77997	1.51102e-10
chr11.40027069.40028383	2.50177	3.56884e-05	2.12227	0.000337491	chr15.63942931.63943609	1.73216	0.0099196	1.3944	0.00868677	chr10.108197348.108198032	2.07055	0.00847035	1.8184	0.00601046
chr11.40546617.40547011	2.59334	0.00189306	3.11949	0.000554619	chr15.64366550.64367100	1.95645	0.00350018	2.02726	0.000231572	chr10.108361352.108362197	3.40109	6.51682e-07	2.51334	5.91926e-07
chr11.40784335.40785159	1.71199	0.00437189	2.09953	0.000861407	chr15.64518983.64519701	3.63799	8.96802e-09	1.90302	1.05812e-05	chr10.108470220.108470994	2.09997	0.000751615	2.33345	4.1197e-06
chr11.41152975.41154214	1.76615	0.00953419	1.81433	0.00985635	chr15.66438561.66439010	2.31912	0.00146664	2.15041	0.000605269	chr10.108679564.108680477	1.99646	7.97231e-06	1.24504	1.92327e-06
chr11.41217745.41218475	2.312	0.00160159	1.89239	0.00821056	chr15.67659504.67660451	2.08329	0.00519814	1.74128	0.00539244	chr10.109299596.109300491	2.59247	8.2478e-05	1.71306	0.000725768
chr11.41491141.41492774	1.56569	0.00634286	1.77388	0.00139336	chr15.67940401.67940956	2.3035	0.00123068	1.8626	0.00147238	chr10.109718202.109719506	3.04505	1.80584e-07	2.48845	5.46889e-10
chr11.41627775.41628667	2.44858	0.00046171	2.28189	0.000985345	chr15.68501388.68502344	2.16999	0.000282364	1.59287	0.000142673	chr10.110073690.110074653	1.81505	0.00609592	1.50555	0.00727284
chr11.41652283.41653154	2.37276	2.44837e-05	3.35852	9.24519e-11	chr15.70813774.70814401	2.35739	0.00274586	2.63272	0.000195462	chr10.110775453.110776213	1.92108	0.0039907	1.9713	0.000391355
chr11.41812785.41813469	1.91223	0.00377029	2.71558	0.000123784	chr15.71066542.71067173	2.21068	0.00043267	2.8516	4.23211e-10	chr10.110857710.110858613	3.80583	9.74056e-09	1.16237	0.00567289
chr11.41918831.41919502	3.1035	3.07724e-05	2.44559	0.000350734	chr15.71157505.71158462	3.5205	1.64737e-11	2.7214	2.52742e-15	chr10.110929596.110930240	2.18385	0.000642259	1.68465	0.000804263
chr11.42050904.42051952	3.14254	2.21401e-07	3.70397	6.76729e-10	chr15.72105584.72106697	2.33433	0.00051384	2.7043	5.024e-07	chr10.110935190.110936036	3.36639	7.47475e-07	2.53852	6.99907e-07
chr11.42132083.42132652	3.21574	8.39041e-06	2.60055	0.000190597	chr15.72200964.72201164	2.25433	0.00674792	2.83594	0.000200676	chr10.111083280.111083704	2.17817	0.00386958	1.84133	0.00324312
chr11.42246990.42247658	2.7627	0.000121999	2.99688	4.96725e-05	chr15.73802641.73803593	3.03251	6.2183e-06	1.45131	0.00182206	chr10.111528937.111530158	2.00944	0.00123953	2.68325	7.48862e-08
chr11.42365484.42366303	1.78539	0.00672553	1.72177	0.00417366	chr15.73915810.73916668	1.92734	0.00328617	1.86066	0.000399444	chr10.111686304.111687136	4.01394	3.52444e-08	1.22367	0.00974975
chr11.42651562.42652313	2.57121	0.000402777	2.02328	0.00830265	chr15.74222139.74223268	1.91456	0.000912439	1.74371	7.86059e-06	chr10.112310338.112311065	2.398	0.000755844	2.21123	0.000258386
chr11.42806807.42807948	2.17223	0.000575033	2.09418	0.000717782	chr15.78424549.78424969	3.33776	4.04943e-05	2.84251	1.73244e-05	chr10.112364240.112365165	3.0371	2.99699e-07	2.59775	5.59815e-09
chr11.42926466.42927687	1.85317	0.00198029	1.97665	0.000639274	chr15.79727781.79728562	2.21143	0.000656844	2.09495	2.15991e-05	chr10.112760268.112761287	1.53016	0.00872458	1.15677	0.00919722
chr11.43141007.43141952	1.97544	0.00458964	1.80825	0.00836917	chr15.81226777.81227279	2.88718	0.00295042	2.19256	0.00532816	chr10.112768920.112769389	2.78682	0.00209704	2.16193	0.00360863
chr11.43883483.43884452	2.97065	1.3187e-05	2.36624	0.000280337	chr15.84133369.84133932	2.86601	0.000138526	2.33129	0.000178033	chr10.112969327.112969913	3.08885	0.000316832	2.49761	0.000403043
chr11.44052018.44053072	1.96739	0.00162859	2.25732	0.000302065	chr15.85364294.85364738	1.95802	0.00602614	1.64155	0.00546287	chr10.113002779.113003101	3.59253	0.000201794	2.40943	0.00125708
chr11.44070095.44070665	2.33488	0.00137245	2.16156	0.00303922	chr15.87935597.87936520	2.00673	0.00480163	2.05029	0.000685012	chr10.113176867.113177341	2.91987	0.000956041	1.9152	0.00829047
chr11.44184947.44185999	2.17809	0.00113392	1.80806	0.00599212	chr15.88881441.88882225	2.20599	0.00465321	2.14351	0.00100476	chr10.114516772.114517426	2.96714	1.14428e-05	2.83622	1.21957e-07
chr11.44303280.44304389	2.16356	0.0014142	1.80832	0.00628368	chr15.90071786.90072497	1.82346	0.00090361	2.23221	8.30235e-10	chr10.114684150.114685208	3.26727	1.84341e-09	1.96604	5.95083e-08
chr11.45319722.45320583	1.82103	0.00409566	1.96512	0.00182374	chr15.91607131.91607712	2.93465	0.000507619	1.96692	0.0047554	chr10.114691442.114692085	2.03759	0.00665497	1.79222	0.00397281
chr11.45397920.45398733	1.97524	0.00917362	2.28564	0.00233748	chr15.91974801.91975766	2.11117	0.00313729	2.08308	0.000456147	chr10.114982954.114984241	3.37333	5.31529e-09	1.5762	7.28041e-06
chr11.45623796.45624842	2.01707	0.00176301	2.05433	0.000895194	chr15.92808068.92809282	2.34301	0.000366275	1.68034	0.000890515	chr10.115026794.115027441	2.67217	9.40537e-05	2.40528	1.15851e-05
chr11.45897433.45898253	1.9814	0.00118081	2.58091	0.00016702	chr15.93443347.93444184	2.48679	0.000169498	2.15451	4.38597e-05	chr10.115797293.115797848	3.14972	0.000158431	1.95387	0.00254602
chr11.45937281.45938014	2.58551	9.92682e-05	3.03691	1.14555e-05	chr15.93774381.93775859	1.95542	0.00256912	1.67714	0.0009675	chr10.116096542.116096963	2.59739	8.06638e-05	1.54275	0.00226855
chr11.45974311.45974894	2.29952	0.000618191	2.69969	7.11477e-05	chr15.94443684.94445086	1.67563	0.00628915	1.44607	0.00145416	chr10.116129664.116130238	3.5145	2.39944e-05	2.50074	5.28095e-05
chr11.45976020.45976531	2.45165	0.000583049	2.24751	0.00127044	chr15.97418031.97419000	4.07799	8.96802e-09	2.50965	3.56549e-07	chr10.116274872.116275704	2.37608	0.000557112	1.98986	0.000243372
chr11.46203039.46203594	2.18098	0.00121076	2.79463	3.3642e-05	chr15.101544236.101544853	1.96247	0.00555771	1.59693	0.00608472	chr10.116386001.116387185	2.49905	7.35041e-07	2.4124	1.69905e-10
chr11.46205627.46206344	1.74286	0.00408119	2.63898	2.24485e-05	chr15.101583096.101583975	2.48371	0.00141768	1.91808	0.00264966	chr10.116417929.116418950	3.58203	2.20383e-13	1.52585	5.47918e-09
chr11.46331953.46333126	1.79628	0.00377876	2.79215	9.53669e-06	chr15.103484316.103485043	2.51316	0.000996612	2.14322	0.000850067	chr10.116450488.116451129	1.6506	0.00385754	2.32677	5.33403e-07
chr11.46548913.46549527	2.06529	0.00383585	2.15554	0.00172224	chr15.103500572.103501454	2.80082	2.21401e-07	2.74839	1.76511e-12	chr10.116457481.116458197	1.87388	0.00525224	2.23118	0.000109895
chr11.46552285.46553484	1.61908	0.0092473	2.43431	0.000115082	chr16.7354151.7354533	2.88598	0.000977351	2.02752	0.00696785	chr10.117277702.117279254	1.41187	0.00447659	1.42938	1.68925e-05
chr11.46619802.46621142	1.87196	0.00292422	2.03067	0.000518444	chr16.8496848.8497525	3.73516	4.35351e-06	1.87737	0.00158194	chr10.117415919.117416583	2.95519	0.000173993	2.30353	0.000187805
chr11.46787792.46788248	3.40351	7.21704e-05	2.16368	0.00704587	chr16.8654982.8655576	3.25655	1.2537e-05	1.5317	0.00851659	chr10.117457026.117457850	2.03586	0.00165956	1.45846	0.00325825
chr11.47481174.47481877	2.22444	0.00255433	2.43641	0.00158075	chr16.10925488.10926109	2.00529	0.00894378	1.82405	0.00495603	chr10.117825543.117826264	2.19923	0.00293459	1.93843	0.00137975
chr11.48044963.48046205	1.91453	0.00640812	1.84575	0.00815767	chr16.12312091.12312643	2.84386	0.00125674	2.22229	0.0035223	chr10.117939167.117939731	3.41968	2.06762e-07	2.49303	4.17822e-07
chr11.48551074.48552602	1.93236	0.0010317	2.28471	5.01868e-05	chr16.12517234.12517837	2.22882	0.00246704	1.64643	0.00655256	chr10.117982438.117983366	1.88653	0.000196123	1.82378	3.58986e-07
chr11.48572200.48572793	3.4741	5.728e-07	2.87544	1.67703e-05	chr16.12847273.12847927	3.52298	8.02989e-07	1.30941	0.0063707	chr10.118681018.118681667	2.32628	0.000169216	1.32515	0.00456129
chr11.49191111.49192291	2.78788	2.11569e-05	2.41302	0.000328474	chr16.14711749.14712940	1.62181	0.00536005	1.42337	0.000489007	chr10.118742592.118743171	2.50022	0.00050571	2.04261	0.000393915
chr11.49286920.49287759	1.99299	0.00566937	2.62501	0.000457227	chr16.17943220.17944059	2.39653	0.00123348	1.83856	0.00260919	chr10.118753902.118755041	3.05129	6.61295e-07	2.77722	1.00671e-08
chr11.49292502.49293262	1.65223	0.00475113	2.55403	1.58377e-05	chr16.22662137.22662934	2.2067	0.00126199	1.39014	0.0089199	chr10.119051447.119052105	2.33512	0.000168169	2.93912	1.70412e-08
chr11.49326630.49327238	2.43222	0.00564096	2.53373	0.00543757	chr16.24569192.24570535	1.46344	0.00879005	1.16478	0.00193865	chr10.119161848.119162527	1.89946	0.00447448	1.93367	0.000543215
chr11.49895913.49896616	2.16879	0.00187232	2.8331	0.000106846	chr16.25806560.25807433	2.0029	0.00178903	1.91043	3.22406e-05	chr10.119252825.119253374	3.50003	5.26414e-06	2.19813	9.97062e-05
chr11.49945727.49946307	2.1023	0.0075768	2.5394	0.0016371	chr16.26095746.26096400	2.86744	4.74094e-06	1.54933	0.000448062	chr10.119371999.119373252	3.20432	5.35396e-07	1.39196	0.000486266
chr11.50057684.50058611	2.08803	0.000953629	1.96083	0.00234673	chr16.26359579.26360146	2.08476	0.00781843	1.77392	0.00681617	chr10.119633553.119635021	2.87417	3.21196e-09	1.52142	4.03427e-07
chr11.50177163.50177584	2.51439	0.00103672	2.22778	0.00262923	chr16.26421913.26422663	1.73736	0.00285305	2.25976	6.92619e-07	chr10.119667556.119667954	4.33832	4.0439e-09	2.63844	1.08787e-07
chr11.50233051.50233462	2.46926	0.00200808	3.16146	0.000269505	chr16.26500735.26501821	2.42228	0.000839185	1.48215	0.00804248	chr10.120141043.120141720	2.73399	0.000114989	2.45024	1.13843e-05
chr11.51318327.51318862	2.15177	0.00248609	2.07141	0.00413157	chr16.27155458.27156435	2.45852	4.28559e-05	1.21802	0.00346764	chr10.120173776.120174512	2.20291	0.00185984	2.15753	0.000246076
chr11.51380946.51381725	1.98422	0.00887523	2.21701	0.00308101	chr16.29144495.29145410	2.16755	0.00260181	1.71453	0.00367549	chr10.120783817.120784626	2.39351	0.00131812	1.95735	0.00119238
chr11.51800871.51801948	1.78441	0.00146664	3.0904	2.68652e-07	chr16.29761720.29762704	2.0789	0.00242104	1.54291	0.00471302	chr10.120799379.120800040	4.17862	3.50074e-06	2.16379	0.000936477
chr11.52335777.52336631	2.20456	0.00208494	3.03598	6.12637e-06	chr16.29854922.29855605	2.53145	0.00292422	1.82807	0.00847295	chr10.121323350.121324027	2.48954	0.000301457	1.6486	0.00249391
chr11.52591373.52592309	2.81269	0.000277939	3.17331	4.8687e-05	chr16.30149625.30150196	3.95828	5.60404e-06	2.4018	0.000219641	chr10.121692423.121692840	3.52234	1.26521e-05	3.06125	2.12447e-06
chr11.53228837.53229537	1.92078	0.00591092	2.57213	0.000393668	chr16.30653789.30654498	2.60517	0.000227558	2.27128	4.63842e-05	chr10.121859924.121860795	1.79763	0.00132669	1.02086	0.00869768
chr11.53841943.53842786	1.71165	0.00875766	2.587	0.000136776	chr16.30995313.30995988	2.05584	0.00215414	2.4168	1.83767e-05	chr10.121860958.121861680	2.9514	1.44624e-07	1.6408	2.46722e-05
chr11.53862170.53862567	2.72202	0.00265762	2.57698	0.00567522	chr16.31132038.31132879	2.62062	0.000136685	1.9409	0.000200224	chr10.121877192.121877891	2.43569	0.000297451	2.08707	0.000193763
chr11.54833386.54834429	1.90691	0.000271327	2.61961	1.4626e-07	chr16.35066775.35067495	2.28212	0.000322099	1.82339	0.000286162	chr10.121922276.121923038	3.68315	1.96385e-09	2.68953	6.10567e-10
chr11.55966163.55967055	2.12318	0.00256375	1.99626	0.00538244	chr16.35085419.35085993	2.41544	0.00146181	1.70101	0.00575702	chr10.122185100.122185797	2.46765	0.000293269	2.39178	2.10968e-05
chr11.56054377.56055052	2.1356	0.00501955	3.10225	0.000212565	chr16.35098550.35099718	2.53296	0.000184602	1.88282	0.000397036	chr10.122362599.122364004	2.75998	9.18659e-05	2.33579	1.12214e-06
chr11.56193324.56194080	2.31821	0.000946313	2.08894	0.00235158	chr16.35207203.35207782	3.13112	2.08841e-05	2.19113	7.11975e-05	chr10.122840438.122841196	2.50151	0.000166098	1.48391	0.00361688
chr11.57261578.57262319	2.46251	0.000126799	2.34583	0.0003608	chr16.35220410.35220955	3.39561	3.1374e-07	1.76816	4.38786e-05	chr10.123501472.123502497	2.74163	2.18123e-05	1.34556	0.00335141
chr11.57274578.57275082	1.6544	0.00945298	2.78775	4.03795e-05	chr16.35231398.35232837	2.0257	0.000575151	1.60472	0.000184337	chr10.123943746.123944295	2.20839	0.00241425	1.8059	0.00217762
chr11.57412697.57413182	2.58534	0.00207778	2.45575	0.00456522	chr16.35404937.35406213	1.90735	0.00236708	1.34231	0.00549618	chr10.124498698.124499616	3.32386	5.47901e-06	2.70424	4.20368e-06
chr11.57459614.57460348	1.9837	0.0022507	1.94382	0.00247182	chr16.35902151.35902980	1.84343	0.0059654	2.46592	1.8103e-05	chr10.124942106.124942535	2.10021	0.0053894	2.21845	0.000564811
chr11.57521949.57522794	3.0075	1.02368e-06	3.6006	2.74767e-08	chr16.36578747.36579673	2.574	0.00102615	1.8489	0.00154218	chr10.124967377.124967741	3.59814	0.000195946	2.78565	0.000259689
chr11.58143596.58144192	2.20872	0.00182995	3.46079	1.46459e-05	chr16.36911813.36912343	2.36752	0.00405509	2.29185	0.00121859	chr10.125050021.125050576	2.90529	8.06851e-05	3.53837	2.26178e-08
chr11.59058064.59058456	2.23547	0.00563444	3.14557	0.000286689	chr16.36944813.36945538	2.01471	0.000723133	2.15336	1.92704e-06	chr10.125120169.125121116	2.83298	1.75995e-05	2.22861	1.32476e-05
chr11.59304812.59305767	2.64454	4.42732e-05	2.06615	0.00145508	chr16.39483519.39485088	1.91799	0.00394793	1.99435	0.000214554	chr10.125294480.125295508	2.13686	0.000946081	2.28277	3.42964e-05
chr11.59332892.59333462	2.55694	0.00108587	2.583	0.00180799	chr16.40504139.40504629	1.92259	0.00870186	1.80103	0.00353385	chr10.125676900.125677582	4.08166	4.48911e-08	1.42931	0.00194543
chr11.59338710.59339266	3.17105	0.000223332	3.02667	0.000606031	chr16.43872433.43872995	2.83934	8.84967e-05	1.92908	0.000405166	chr10.126717760.126718569	2.30714	0.000144045	2.5036	4.09572e-07
chr11.59354558.59355535	2.13772	0.00475188	2.48422	0.00130677	chr16.43924823.43925641	3.62182	6.21273e-08	1.67696	0.000217241	chr10.126797898.126798699	3.20189	3.65301e-06	2.22727	1.509e-05
chr11.59486096.59486623	2.0788	0.00748811	2.73719	0.000713301	chr16.44011079.44011776	3.11622	6.03879e-06	2.47954	4.72302e-06	chr11.5172872.5173476	2.47309	0.000111733	1.74847	0.000398651
chr11.59496204.59497506	3.20847	5.4467e-06	4.24327	2.77775e-08	chr16.45123414.45124050	2.31559	0.000277267	1.42801	0.00142887	chr11.6110883.6111857	1.67545	0.00632952	1.98626	0.000101482
chr11.59543969.59544423	2.07621	0.00748446	3.43916	0.00022241	chr16.47639628.47640424	2.04002	0.000820028	2.22118	5.08105e-06	chr11.7809131.7810108	2.76998	1.26325e-05	1.95083	5.69431e-05
chr11.60032275.60032991	2.2439	0.00278252	2.3591	0.00267098	chr16.49082908.49083708	2.58977	2.23462e-05	1.6928	4.07618e-05	chr11.8531951.8532765	2.34558	1.56101e-05	1.08864	0.00553339
chr11.60057992.60058548	2.95767	0.000685185	3.81568	0.000110355	chr16.49511996.49512789	3.08629	1.34478e-05	1.89001	0.000282172	chr11.9722648.9723394	2.44992	0.000280891	1.40286	0.00874352
chr11.61429926.61431256	3.18946	9.5724e-06	2.54994	0.000727263	chr16.50578133.50578921	1.85928	0.00770564	1.85513	0.00112389	chr11.12219723.12220414	2.34444	0.000509187	1.47333	0.00396834
chr11.61434721.61435120	2.55865	0.00128583	2.73254	0.000949639	chr16.52323622.52324838	2.21737	0.00131963	1.89061	0.000200258	chr11.12581034.12581763	1.85373	0.00294356	1.74045	0.00045041
chr11.62010648.62011263	2.17463	0.00118485	1.85476	0.0048001	chr16.52498478.52499514	2.75996	1.01021e-05	1.47961	0.000647977	chr11.12683891.12684973	2.74147	0.000206357	2.13983	0.000256561
chr11.62044342.62045101	2.26463	0.000238927	1.77875	0.00242558	chr16.52781057.52781572	2.41641	0.000859656	2.29564	7.15435e-05	chr11.12850190.12851720	1.56966	0.00335317	1.28182	0.000713016
chr11.62636720.62637638	1.58472	0.00900462	1.87047	0.00165286	chr16.53081787.53082655	2.90685	8.06256e-06	1.92686	6.5229e-05	chr11.13038458.13039387	3.4808	1.26914e-08	2.84347	6.51247e-10
chr11.63176007.63177132	2.08448	0.0012037	2.12424	0.000977728	chr16.53903174.53903761	2.38899	0.00354037	1.99292	0.00423791	chr11.13126507.13127347	2.7837	1.47587e-05	1.99515	2.32464e-05
chr11.64058157.64059037	2.4989	0.000259061	2.54004	5.44187e-05	chr16.54089317.54090045	2.5385	0.000136955	2.6305	1.51829e-06	chr11.13271315.13272158	3.3725	1.66695e-07	1.77193	0.000122112
chr11.64331702.64332515	1.81073	0.00289614	2.33078	9.65988e-05	chr16.54174180.54174711	2.27412	0.00276868	2.96936	2.33287e-05	chr11.13392093.13393008	3.91828	4.91401e-09	2.71575	2.5332e-10
chr11.64743405.64744112	1.87395	0.00655047	2.86417	9.22553e-05	chr16.55313049.55313625	2.59705	0.00100996	2.33246	0.000477517	chr11.13443048.13443971	3.47428	2.15825e-08	2.85588	9.57801e-10
chr11.65375380.65376091	2.04743	0.00638169	1.97431	0.00892315	chr16.55746107.55746747	2.59409	0.000110104	2.49811	7.74634e-06	chr11.13447532.13447973	2.5109	0.00157535	2.2584	0.000567726
chr11.65930342.65931221	2.36051	0.00114506	2.25171	0.000950334	chr16.55827634.55828395	2.39328	0.000423434	1.4172	0.0066901	chr11.13603558.13604483	1.6001	0.00441129	1.83337	1.77866e-06
chr11.65985373.65986254	2.71918	0.000296932	2.84439	0.000223153	chr16.56435229.56436240	2.06106	0.00386343	1.52655	0.00857742	chr11.13611257.13611895	2.87656	5.36938e-05	2.73568	1.49378e-06
chr11.66163988.66164364	3.21672	2.23462e-05	3.71578	7.37272e-06	chr16.57101217.57101975	3.77207	5.75276e-09	2.07764	1.40146e-06	chr11.13701834.13702802	3.09521	2.76764e-07	2.53946	2.71994e-08
chr11.66425987.66426669	2.20913	0.0040771	2.4839	0.00114018	chr16.57111582.57112023	2.94095	0.000106948	2.38138	0.00013618	chr11.13777404.13778376	1.55894	0.00442261	1.85573	2.18878e-05
chr11.67062701.67063754	2.67019	0.000201557	2.16691	0.00184314	chr16.57117514.57117968	2.57878	5.77525e-06	2.45496	1.5464e-08	chr11.13792269.13793045	3.22035	2.54749e-07	2.9572	4.57783e-10
chr11.67098030.67098985	2.47801	7.10599e-05	2.09197	0.000377961	chr16.57414819.57415635	2.3885	0.000902285	1.90972	0.00128371	chr11.13852175.13852843	2.4191	0.00278464	2.61457	0.000198414
chr11.67125053.67125964	1.73755	0.00376719	2.48188	8.95356e-05	chr16.59492740.59493975	1.63627	0.00765466	1.73009	0.000188649	chr11.13879435.13880015	2.3973	0.000745192	1.56669	0.00582123
chr11.67221713.67222162	2.2073	0.00888424	2.54085	0.00378428	chr16.60395222.60395828	2.22109	0.0014379	1.87225	0.000967308	chr11.14030818.14031969	2.64208	4.35387e-05	1.91511	0.000185973
chr11.67821595.67822076	2.4643	0.00194533	2.34023	0.0040351	chr16.60559291.60559933	2.19174	0.000456723	2.08663	2.24567e-05	chr11.14201986.14203327	2.87071	1.13965e-06	2.33311	3.44167e-08
chr11.68862643.68863501	2.52895	0.00105813	3.08812	9.69732e-05	chr16.60815576.60816743	1.99796	0.000354975	1.567	0.000106612	chr11.14350391.14351674	2.45797	6.8271e-07	1.45584	5.53727e-06
chr11.72501562.72502795	1.67657	0.00371403	1.60953	0.00349028	chr16.62288416.62289646	2.33308	3.57649e-05	2.09243	4.36797e-07	chr11.14370078.14370948	2.08043	0.00127146	1.49464	0.00392741
chr11.72566661.72567480	2.01745	0.00422996	2.1057	0.00288359	chr16.63436274.63437196	1.96733	0.00737954	1.63947	0.00789497	chr11.14387089.14388521	1.55877	0.006627	1.83432	8.21173e-05
chr11.72654980.72655796	2.82083	0.000284465	2.91542	0.000291694	chr16.63747734.63748304	2.21148	0.00619028	1.89641	0.00613006	chr11.14878699.14879607	2.59981	0.000561621	1.90397	0.000971124
chr11.72769063.72769565	2.30697	0.00196564	2.26613	0.00271473	chr16.64000648.64001644	2.32661	5.64674e-05	1.86789	4.03268e-07	chr11.15412468.15412993	1.91436	0.00964206	2.44005	9.52829e-05
chr11.73036699.73037327	2.38754	0.00096726	2.70126	0.000226972	chr16.64099909.64100479	2.82217	0.000626506	2.67385	0.000134737	chr11.16158948.16159546	4.34484	7.7924e-08	2.86161	2.44621e-07
chr11.73087371.73087919	2.3011	0.00650893	2.41477	0.00525814	chr16.64211526.64212533	2.7575	4.91993e-05	2.03759	0.000135068	chr11.16411576.16412234	3.42524	1.59098e-08	2.85975	2.11005e-10
chr11.75126026.75126744	2.4363	0.00478023	3.65219	0.000148892	chr16.64381151.64382005	2.71808	0.000524427	1.82742	0.0033389	chr11.16416553.16417124	2.95203	1.83634e-05	2.73227	6.80077e-07
chr11.75223941.75224423	2.49753	0.00187743	2.67059	0.00138626	chr16.66205077.66206088	2.45007	7.34089e-05	1.79503	9.93994e-05	chr11.16682946.16683839	2.02329	0.00583052	1.67368	0.00663533
chr11.75296487.75296875	2.64303	0.00118087	2.67187	0.00258874	chr16.67182498.67183496	1.84832	0.00317978	1.42514	0.00285407	chr11.18069442.18070270	2.24575	0.00258641	1.68197	0.00559183
chr11.79182752.79183439	2.06063	0.00119291	2.51595	7.5327e-05	chr16.68027425.68028492	1.81672	0.00517943	1.61194	0.00165822	chr11.19208150.19208846	2.89392	8.18589e-05	2.02154	0.00045628
chr11.79459503.79460219	2.49998	0.00206517	2.83136	0.000567488	chr16.68040740.68041349	2.5865	0.000531364	3.12468	4.05687e-06	chr11.19265187.19266033	2.54517	7.53452e-05	1.7567	0.000278151
chr11.79519746.79520380	2.00269	0.00471589	2.43094	0.000744673	chr16.68393443.68394033	2.42316	0.00684983	2.39988	0.00227554	chr11.19530439.19531138	3.40443	1.49772e-07	1.89594	3.78806e-05
chr11.80304808.80305429	2.18337	0.00723946	4.48672	1.04115e-06	chr16.69283416.69284002	3.19366	8.03767e-05	2.48212	0.000203722	chr11.19626815.19627578	2.3353	0.00105397	2.42471	5.13405e-05
chr11.80555274.80555910	2.0724	0.0050067	3.26437	5.98172e-05	chr16.69368415.69369143	2.58704	0.000354975	1.76702	0.00192602	chr11.21604145.21604887	2.74977	0.000887078	1.91244	0.00474872
chr11.80664274.80664855	3.31751	8.13134e-05	3.17444	0.00024116	chr16.69467902.69468385	2.54438	0.000321894	1.81471	0.000899701	chr11.21873629.21874303	2.52112	0.000739814	2.14165	0.00145605
chr11.80923422.80924377	2.00378	0.00177537	2.70141	6.60781e-05	chr16.69503175.69503987	2.28059	0.00516457	2.27612	0.00147058	chr11.23859423.23859944	2.22565	0.00133549	1.81425	0.00148609
chr11.81002739.81003425	2.4897	0.00119128	2.21655	0.0038608	chr16.69984288.69984793	2.66831	0.00140125	2.10246	0.00267359	chr11.24094772.24096011	1.2005	0.00676675	1.15873	6.35851e-06
chr11.83045537.83046107	3.1213	0.00012266	3.13828	0.000330084	chr16.70308831.70309520	1.84661	0.00584871	2.4524	2.01395e-05	chr11.24372108.24373520	2.51406	2.59329e-07	1.89229	4.56117e-08
chr11.83335672.83336356	2.32254	0.000243386	2.74392	2.51824e-05	chr16.70333680.70335103	2.10477	0.000340377	2.11914	1.89115e-06	chr11.24731095.24732468	2.69861	5.34191e-07	1.55322	2.36083e-05
chr11.84194828.84195088	2.85696	0.0021909	2.63478	0.00671057	chr16.70861463.70862138	3.02573	8.94843e-05	2.07484	0.000706125	chr11.25110703.25112233	2.15324	0.000138429	1.21512	0.0030427
chr11.84904566.84905358	3.15311	1.3509e-05	2.29017	0.00148867	chr16.70899720.70900570	2.69051	0.000193872	2.21352	0.000203722	chr11.25168357.25169846	2.17133	0.000560203	1.52842	0.00174324
chr11.86278435.86279041	2.61532	0.000601993	2.96771	0.00040996	chr16.72337648.72338166	3.17706	1.23231e-06	2.1577	6.68538e-06	chr11.25330218.25330856	2.75754	3.65057e-05	2.20125	2.07781e-05
chr11.86434184.86434556	2.52241	0.00307729	3.76657	0.000147368	chr16.72958954.72960197	2.65802	7.99686e-05	1.78729	0.000210217	chr11.25433756.25434649	2.81263	3.36898e-05	1.76227	0.000430267
chr11.87553171.87553691	2.69959	0.00038563	2.96262	0.000234714	chr16.74234325.74235488	1.89286	0.000769857	1.33151	0.000552952	chr11.25459788.25460305	2.43958	0.0012604	2.06985	0.00101099
chr11.88245516.88246347	2.62782	0.000536266	2.56625	0.00115575	chr16.74449729.74450348	2.37963	0.00192926	1.74494	0.006309	chr11.25650687.25651201	2.26746	0.00359773	2.0652	0.00137718
chr11.88778041.88778824	2.68071	0.000349264	2.57522	0.000652263	chr16.74960213.74960984	3.30156	5.35925e-06	2.08078	0.000127132	chr11.25697583.25698313	1.56232	0.00566377	1.19562	0.00534027
chr11.88782388.88782785	3.03769	0.00119518	3.51726	0.000737469	chr16.75026765.75027615	2.79627	2.3466e-07	2.96431	2.71826e-13	chr11.25729471.25730235	2.07882	0.00106134	1.77052	0.000438873
chr11.88939455.88940107	2.08575	0.00173475	2.95163	3.69066e-05	chr16.76082273.76083163	3.02549	8.79434e-07	2.86736	1.41208e-10	chr11.25814332.25815156	2.52687	0.000270729	1.90303	0.000590268
chr11.89615447.89616490	2.52821	8.73941e-06	2.72366	1.3003e-06	chr16.76227574.76228642	2.35574	0.000686184	1.86005	0.000484833	chr11.26008404.26009656	2.41158	2.93795e-05	1.81368	2.41952e-05
chr11.90175440.90176431	2.61632	6.42011e-05	2.86434	5.5185e-06	chr16.77835682.77836499	2.72601	0.000183416	1.62918	0.00468372	chr11.26041299.26041852	2.35592	0.00618827	2.03436	0.0049795
chr11.90197934.90198542	2.27865	0.00332259	2.80328	0.000371734	chr16.77859628.77860303	2.10753	0.00274005	1.69052	0.00278996	chr11.26071584.26072133	2.46925	0.000292603	1.48614	0.00446443
chr11.90242876.90243819	2.56845	0.000125629	2.20862	0.000580886	chr16.78388792.78389958	2.85763	6.06615e-06	1.61181	0.000282047	chr11.26445599.26446184	2.47841	0.00132239	2.07416	0.00131249
chr11.90364912.90365706	1.61431	0.00963571	1.69074	0.00564954	chr16.78407661.78408306	2.29114	0.00333459	2.23957	0.000981152	chr11.26773267.26774507	2.03178	9.78689e-05	2.49548	5.1981e-11
chr11.90755556.90756546	2.23352	0.0011919	1.82618	0.00458224	chr16.78827610.78828453	2.64028	1.42639e-05	2.17359	6.6688e-07	chr11.26962097.26962672	1.87178	0.00378479	1.3974	0.00912608
chr11.90863808.90864707	1.62536	0.00915733	2.04828	0.000887127	chr16.78937520.78938340	1.94954	0.00286174	1.90518	0.000191724	chr11.27561251.27561812	2.3775	0.00304953	2.46746	0.000373412
chr11.91297458.91297922	2.77574	0.00136869	2.4468	0.0054262	chr16.80055436.80056022	1.94929	0.00968355	2.3221	0.0002596	chr11.28127720.28128168	2.93824	0.000524158	2.33245	0.000722324
chr11.91861909.91862662	1.99184	0.00912616	2.93377	0.000334599	chr16.80925540.80926408	2.59296	1.74871e-05	3.43115	8.38671e-11	chr11.28254481.28255187	2.29537	0.00228621	1.87284	0.00243131
chr11.91903791.91904368	3.24058	2.17422e-05	2.25246	0.00195536	chr16.82049916.82050835	2.17459	0.000233354	2.19475	1.1473e-06	chr11.29638626.29639411	1.48383	0.00598938	1.72838	4.69203e-05
chr11.91995333.91996131	2.14916	0.00178168	1.77784	0.00855203	chr16.82992757.82993246	2.53763	0.00215706	1.85768	0.00825317	chr11.32794025.32795512	1.89479	0.000482484	1.08577	0.00536174
chr11.93039085.93039753	2.87	0.000291929	2.56554	0.00117944	chr16.83606769.83607605	2.14867	0.00190818	1.67309	0.001766	chr11.32857159.32858169	1.82859	0.000887511	1.94322	3.69019e-07
chr11.93273549.93274312	1.88466	0.000436314	2.77559	6.60592e-08	chr16.85415060.85416104	1.93311	0.000656844	1.67225	3.746e-05	chr11.32892718.32893881	2.6889	8.39905e-06	1.76304	1.12808e-05
chr11.93419661.93420322	2.01204	0.00178277	2.56694	0.000265014	chr16.85898388.85898718	2.53716	8.3711e-05	2.09046	3.79071e-05	chr11.33403862.33404694	1.97519	0.00538889	2.12902	0.000337547
chr11.93489770.93490888	3.11586	7.04114e-07	3.19098	6.4411e-08	chr16.85956668.85957704	1.92595	0.000619119	1.33176	0.000647912	chr11.33659054.33659973	2.42054	0.00013287	1.67974	0.000623554
chr11.93565413.93566341	1.54639	0.00288187	3.25436	4.01166e-10	chr16.87538816.87540407	1.62834	0.00461214	1.88093	3.33818e-10	chr11.33781165.33782117	1.96963	0.000104298	1.20085	0.000146195
chr11.93577231.93577920	2.11262	0.00167221	2.05154	0.00211312	chr16.87688452.87689754	1.68673	0.00266204	2.0811	8.00097e-07	chr11.33786471.33787090	2.45716	2.67909e-05	1.19966	0.00523533
chr11.93587680.93588321	1.92362	0.00238253	3.33514	1.53405e-06	chr16.88728751.88729451	2.94521	2.06845e-05	2.40229	6.54358e-06	chr11.34297388.34298396	1.82377	0.00128764	1.52743	0.000657365
chr11.93852617.93852986	2.52656	0.00257717	3.27106	0.000406796	chr16.88735237.88736299	2.34571	0.000109649	2.70759	3.43729e-08	chr11.34308818.34309504	2.2293	0.000668162	1.87484	0.000385134
chr11.93965324.93965808	2.49473	0.000182704	3.46063	1.39797e-06	chr16.89843098.89843816	2.32837	0.000192867	3.18304	4.42406e-12	chr11.34323448.34324397	2.69146	1.01329e-06	2.44757	1.48111e-08
chr11.96678926.96679634	2.89785	0.000241057	3.31568	5.76956e-05	chr16.89857614.89858685	1.89062	0.00148726	1.71612	0.0001376	chr11.34327694.34328340	2.47171	0.000115906	2.17238	2.28228e-05
chr11.96840012.96840880	2.47574	0.000223332	3.47556	3.48928e-06	chr16.89920204.89920963	1.66854	0.00443	2.9336	8.52346e-10	chr11.34341706.34342477	2.94713	5.54294e-07	2.67825	1.91525e-09
chr11.97175416.97176213	2.79641	0.000439781	2.82553	0.000349184	chr16.89931515.89932294	2.94411	3.66004e-07	2.74548	5.99638e-11	chr11.34344125.34344992	2.2373	1.23478e-05	2.5761	4.79714e-12
chr11.97867570.97867994	2.74903	0.00201295	3.73133	0.000236169	chr16.90298519.90299211	2.74123	3.91123e-05	1.89386	9.15585e-05	chr11.34355409.34356389	1.84465	0.000904131	2.33309	2.85561e-09
chr11.98037797.98038305	2.34711	0.000680496	1.80702	0.00568637	chr16.91429567.91430136	2.68555	0.00161954	1.99979	0.00520181	chr11.34363955.34364926	3.29738	1.40995e-09	1.03328	0.00232893
chr11.99392241.99392934	2.1231	0.00539811	2.19168	0.00669852	chr16.91606870.91607429	3.58486	2.29817e-06	2.06743	0.000298793	chr11.34379976.34380505	2.8947	0.000320993	1.73176	0.00743959
chr11.100071575.100072181	1.80535	0.00560136	2.94321	2.04702e-05	chr16.92533139.92533826	2.67676	0.00092619	1.96029	0.00332629	chr11.34391828.34392696	2.0326	0.00011844	1.48288	6.65112e-05
chr11.101544137.101544707	2.36168	0.00255954	3.84789	3.01501e-05	chr16.97686437.97687399	2.87441	0.000139496	1.46996	0.00865474	chr11.34402814.34403377	3.17365	1.05473e-06	2.45326	6.06696e-07
chr11.102384508.102384846	2.7899	0.00139266	2.70243	0.0031312	chr17.5718903.5719324	2.7166	0.00185764	2.21367	0.00202836	chr11.34704474.34705111	1.67019	0.00249257	1.34355	0.00119944
chr11.103665741.103666840	1.53855	0.00654916	3.00303	4.33272e-07	chr17.8666837.8667507	3.3321	4.2096e-06	2.51828	7.63587e-06	chr11.35006800.35007827	1.80663	0.0014242	1.33489	0.00185175
chr11.103811245.103811609	2.67682	0.00158327	3.00098	0.00107688	chr17.8668226.8668792	3.00836	0.000372914	2.08657	0.00292798	chr11.35250567.35251429	2.16626	0.0013755	1.80304	0.00154326
chr11.104028670.104029704	2.07249	0.00119187	2.97412	5.37536e-06	chr17.8742426.8743169	2.46186	0.000934583	2.09729	0.000997056	chr11.35332403.35333378	2.2131	5.78456e-05	1.42307	0.000379156
chr11.104565183.104565911	2.43496	0.0040144	2.32704	0.00402951	chr17.10946344.10946869	2.35562	0.00826383	2.74621	0.000528971	chr11.35338008.35338893	2.69303	1.6601e-06	1.39587	0.000274589
chr11.104566028.104566483	2.18274	0.00866758	2.74687	0.00171061	chr17.12453614.12454189	2.24989	0.0050466	1.70417	0.00664317	chr11.35421507.35422151	2.94568	5.76434e-06	2.32369	3.56073e-06
chr11.105516553.105517274	2.67383	0.00242344	2.73387	0.00113	chr17.24634805.24635401	2.1433	0.00433145	2.04237	0.000514934	chr11.35544151.35545496	1.6444	0.00113255	2.11596	3.36954e-14
chr11.105827933.105828984	2.30011	0.000426718	2.497	8.18381e-05	chr17.25614541.25615456	2.15021	0.00195031	2.12255	0.000223741	chr11.35663609.35664384	1.879	0.000380289	1.68508	2.78408e-06
chr11.106151994.106152556	2.26415	0.00364014	2.07987	0.00546233	chr17.26645012.26645700	1.83534	0.0076529	2.3077	9.56885e-05	chr11.35962929.35963363	1.9427	0.00493759	1.82888	0.0022481
chr11.106559796.106560464	2.2627	0.000666122	2.16751	0.00119519	chr17.27411130.27412178	2.57686	0.000325239	2.109	4.50409e-05	chr11.36311014.36311449	2.37462	0.00189763	1.87392	0.00332342
chr11.106823684.106824190	2.9257	0.00024798	2.57473	0.00100482	chr17.44047272.44047957	3.24273	0.000167507	2.3208	0.000580255	chr11.36588947.36589452	2.06227	0.00858608	2.08146	0.00187732
chr11.107332187.107332810	2.90186	0.000384245	2.44324	0.00320897	chr17.46295362.46295811	2.33988	0.00257527	2.0587	0.000967668	chr11.36933754.36934502	2.95776	2.30873e-06	1.8786	9.48443e-05
chr11.107361528.107362146	2.28435	0.00312777	2.3094	0.00308191	chr17.48784202.48785196	2.84126	3.32347e-06	2.09094	1.7103e-06	chr11.37030847.37031850	1.7956	0.00353981	1.47081	0.00234283
chr11.108094745.108095196	2.35837	0.00222197	2.12896	0.00597938	chr17.48795595.48796181	2.06929	0.00384705	2.38249	0.000128403	chr11.37242151.37242809	2.91732	0.0003015	2.03787	0.00129317
chr11.108221070.108221990	1.52266	0.00896194	2.41743	4.43955e-05	chr17.50876380.50876943	2.38597	0.000752316	2.31741	4.95247e-05	chr11.37470349.37471236	2.18247	0.00180047	1.75325	0.00210122
chr11.108941555.108942253	1.65168	0.00579471	2.4771	3.51485e-05	chr17.54142372.54142949	1.91686	0.00869602	1.83455	0.00135463	chr11.37503954.37504634	2.5003	0.00020457	1.42778	0.00606071
chr11.108980379.108981446	2.04373	0.000177442	3.06325	1.04886e-07	chr17.57942011.57943022	2.00164	0.00589744	1.64643	0.00655256	chr11.39307193.39307646	2.32831	0.00467407	1.91219	0.00587559
chr11.109717355.109717894	2.1114	0.00064949	1.62951	0.00513714	chr17.60266952.60268560	3.00051	2.10087e-07	1.30396	0.000434665	chr11.39359176.39359945	2.30341	0.000120362	1.22079	0.0041464
chr11.110155856.110156461	2.40112	0.00119238	2.24627	0.00265974	chr17.61974682.61975290	2.87615	0.00012555	2.35405	0.000356194	chr11.39377133.39377789	2.50935	0.00280917	2.08001	0.00319051
chr11.111409185.111409748	2.2209	0.00329531	2.24831	0.00291481	chr17.62414874.62415685	1.84491	0.00114493	2.85719	1.18021e-10	chr11.39453250.39454003	2.13928	0.000402763	1.24897	0.00669048
chr11.111864977.111865567	2.03307	0.00911853	2.2648	0.00455336	chr17.62963503.62964308	2.87431	0.000230414	2.34112	0.000170684	chr11.40076614.40078085	2.95918	1.54935e-06	1.5664	0.000290998
chr11.111913330.111914520	1.9185	0.00310104	1.88103	0.0034838	chr17.63403205.63404405	1.74629	0.00274468	2.04995	5.48332e-07	chr11.40107340.40108033	3.51284	1.28294e-08	3.20277	1.90455e-11
chr11.112106860.112108006	2.0832	0.000821223	1.74703	0.00339536	chr17.63846865.63847505	3.03259	2.55921e-05	1.52344	0.00570369	chr11.40276517.40277465	2.57326	5.85885e-06	1.41564	0.000335568
chr11.112120933.112121531	2.56182	0.000339594	2.4505	0.000520983	chr17.64592845.64593229	2.23806	0.00627324	1.93767	0.00638144	chr11.40362140.40363208	4.25881	4.64484e-14	2.29658	4.47262e-11
chr11.112252112.112253335	2.36681	0.000127258	2.56076	3.8723e-05	chr17.66133525.66134195	3.20616	3.07632e-05	1.6008	0.0059231	chr11.40456415.40457192	3.51549	4.33564e-09	2.14176	1.88488e-07
chr11.112343053.112343738	2.6668	0.000456456	2.30432	0.00203548	chr17.68158002.68159106	1.57826	0.00558689	2.09662	1.79386e-06	chr11.40477260.40478227	2.60955	3.21541e-05	1.75484	0.00048819
chr11.112399909.112400553	1.94957	0.00769166	1.93686	0.00865669	chr17.68923373.68924825	2.2263	0.00105022	1.39807	0.00630829	chr11.40780533.40781091	3.83964	1.01754e-09	2.65732	3.05106e-09
chr11.112470199.112471163	2.06106	7.8002e-05	3.00927	2.67088e-09	chr17.69477589.69478051	1.99531	0.00504121	1.58148	0.00523242	chr11.40853634.40854363	1.71369	0.00610662	2.08916	2.47579e-05
chr11.112494922.112495708	2.29031	0.0010828	1.99706	0.00373406	chr17.69479069.69479567	2.24288	0.00199397	2.15645	0.000296091	chr11.40884230.40885226	2.08509	0.000150433	1.04416	0.00824046
chr11.112974275.112975217	1.8161	0.00615633	1.90195	0.00381535	chr17.73210616.73211547	1.6599	0.00475474	1.23179	0.0032875	chr11.40976780.40977667	3.11717	4.64944e-07	1.98471	7.5297e-06
chr11.113089683.113090345	2.17851	0.00194088	2.31009	0.00068387	chr17.73995811.73996330	3.5327	3.15446e-05	2.0558	0.00175095	chr11.40994604.40995286	2.82705	8.84937e-05	2.08671	0.000163035
chr11.113334392.113336227	2.26009	1.54126e-05	2.81485	4.05806e-08	chr17.76111289.76112435	2.11072	0.000379138	1.53531	3.49884e-05	chr11.41004282.41005263	1.4946	0.00585567	1.80422	8.07796e-06
chr11.113520176.113520983	1.55739	0.00944708	2.08466	0.000429666	chr17.77792232.77793456	2.28113	7.90805e-05	3.21597	5.2867e-14	chr11.41160487.41161114	2.31245	0.000830819	1.63994	0.0032252
chr11.113611011.113611767	2.0188	0.00110455	2.80623	1.33569e-05	chr17.78619442.78619913	2.58787	0.000268295	1.48497	0.00691774	chr11.41213037.41213733	2.57794	0.000270101	2.79095	2.24063e-06
chr11.113788276.113788849	2.12342	0.0032805	3.01046	1.12391e-05	chr17.78697189.78697982	2.04182	0.00458859	1.82653	0.00179258	chr11.41352296.41353077	2.81188	0.000119365	2.07235	0.000281775
chr11.113910117.113911218	1.60918	0.00388901	3.27416	1.59098e-08	chr17.78730664.78731279	2.2518	0.000969363	1.88604	0.000536387	chr11.41450919.41451900	3.90018	1.39371e-07	2.30419	7.75781e-06
chr11.113948486.113949078	2.27405	0.00120589	2.80731	0.000104956	chr17.79630275.79630950	2.59406	0.000316444	1.93092	0.000800161	chr11.41500710.41501430	2.77777	0.000780566	1.87129	0.00468372
chr11.114122093.114122811	3.35011	4.2096e-06	2.91455	7.56126e-05	chr17.79989788.79991115	2.44358	6.17395e-05	2.30035	9.15584e-07	chr11.41731072.41731771	2.12528	0.00165815	1.84904	0.00064615
chr11.114257764.114258615	1.75724	0.00726121	2.6321	0.000210639	chr17.79998960.79999998	2.591	0.00012266	1.59604	0.00202775	chr11.42587004.42587926	1.87348	0.000971783	2.0123	1.65291e-05
chr11.114480107.114480682	2.01588	0.00718816	2.34342	0.00232796	chr17.80160252.80160986	2.9858	1.14752e-05	1.40948	0.00407177	chr11.42644802.42645736	3.5681	1.80381e-08	2.49545	6.58002e-08
chr11.114587050.114587621	2.82595	0.00042071	2.61158	0.00123395	chr17.81017761.81018595	2.21885	4.14928e-05	2.86681	1.00165e-14	chr11.42720555.42721283	2.24413	0.00245628	1.76218	0.00329406
chr11.116416177.116416452	2.93445	0.000897317	4.06527	9.58199e-05	chr17.81558089.81558712	2.45619	0.000489668	1.8213	0.000957927	chr11.42764966.42765900	2.30456	0.000266403	1.53168	0.00164184
chr11.120517997.120518413	2.39853	0.00692862	2.73734	0.0018675	chr17.82215842.82216820	3.99753	1.38044e-13	2.53469	5.89512e-15	chr11.42786133.42787181	2.82592	7.52378e-06	2.41236	2.97738e-06
chr12.4011640.4012299	2.45261	0.000728917	2.45363	0.00101475	chr17.88316137.88317147	1.7934	0.00260005	2.25487	1.03778e-06	chr11.42842888.42843331	2.89973	0.000202934	1.7423	0.00404651
chr12.4201406.4202206	2.052	0.00245305	3.32785	1.34257e-05	chr17.89146263.89146935	2.17943	0.00331231	1.81438	0.00333547	chr11.42882912.42883574	4.51518	5.50816e-11	3.05029	5.38757e-11
chr12.4679836.4681061	1.68232	0.00168597	3.02753	2.26698e-08	chr17.94325991.94326611	2.83855	0.00015072	2.26375	0.000165697	chr11.42982180.42982870	3.00263	4.68269e-05	1.87523	0.000809699
chr12.5069950.5070588	2.63843	0.000100755	3.21571	1.30208e-05	chr18.3463711.3464376	2.68504	0.000795201	1.9933	0.00360388	chr11.43007473.43007926	2.35737	0.00227493	1.77093	0.00489759
chr12.6211083.6212005	2.35152	0.000308166	2.5183	9.14738e-05	chr18.4461522.4462350	2.96278	4.98723e-05	2.92049	9.95353e-07	chr11.43826134.43827062	2.44473	3.43479e-05	1.65411	0.000151287
chr12.6579617.6580758	2.29243	0.000138797	2.30494	8.35153e-05	chr18.4611110.4611597	2.44124	0.000555659	2.49803	3.4963e-05	chr11.44016216.44016802	2.56297	8.45922e-05	2.05169	3.32616e-05
chr12.6815642.6816812	2.5122	0.000133641	3.1604	5.47904e-06	chr18.4630338.4630753	3.33076	0.000365903	2.52984	0.00114483	chr11.44103089.44103875	2.44397	0.000257107	1.74605	0.000907123
chr12.7265375.7265952	2.38319	0.0014141	2.8838	0.000318392	chr18.5713963.5714391	2.58607	0.00217827	1.85994	0.00896665	chr11.44108811.44109656	2.33632	0.000212838	1.69771	0.000583944
chr12.7421679.7422694	1.94938	0.000686184	3.51388	1.42635e-08	chr18.6780144.6780546	2.68978	0.0015846	2.25655	0.00204311	chr11.44264768.44265588	2.98989	1.04678e-09	2.49255	2.72696e-12
chr12.7714737.7715517	2.78072	0.000147662	2.35317	0.00104783	chr18.8124970.8126160	2.50267	3.13989e-05	1.83326	4.19131e-05	chr11.44282346.44282972	2.99267	3.04992e-05	2.01699	0.000840266
chr12.8356950.8358079	1.94727	0.000326475	2.62433	1.85396e-06	chr18.8134743.8135706	2.32449	0.000396399	2.31907	8.55526e-06	chr11.44287147.44287843	2.0206	0.00640451	1.61049	0.00725198
chr12.8908573.8909339	2.30173	0.000894808	2.80402	6.97318e-05	chr18.8453128.8454087	2.16884	0.00045646	2.5447	2.22881e-07	chr11.44334780.44335155	4.27258	3.93496e-07	1.97497	0.00100958
chr12.9247438.9248041	2.18207	0.00239315	2.40152	0.000996388	chr18.9784638.9785476	2.08966	0.00255344	1.88904	0.000861963	chr11.44413141.44413916	3.5857	2.93104e-08	2.92662	2.74765e-09
chr12.9857660.9858587	2.50036	5.1427e-05	2.1556	0.000300248	chr18.10599151.10600062	1.69847	0.00766415	2.19082	1.3385e-06	chr11.44423692.44424484	2.20118	0.000221748	2.17646	1.88594e-06
chr12.10684981.10685667	2.48268	7.21587e-06	4.01309	4.7599e-10	chr18.10941376.10942428	1.57018	0.00178809	1.76641	3.34076e-08	chr11.45241387.45242043	2.08836	0.000972664	1.59076	0.00140014
chr12.10866809.10867417	1.94546	0.00214391	2.24962	0.000414127	chr18.11163573.11164578	2.27448	0.00104513	1.39592	0.0082949	chr11.46109026.46109812	2.13346	6.90353e-05	1.09192	0.00340664
chr12.12231758.12232920	2.29074	0.000834678	1.89824	0.00501763	chr18.11823985.11825236	2.20819	0.000552131	1.61294	0.00105834	chr11.46121307.46122010	2.06696	0.00215134	1.54006	0.00447596
chr12.12489965.12490702	2.38192	0.00198748	2.12206	0.00587872	chr18.12006532.12007319	2.27728	0.00148272	1.87636	0.00141053	chr11.47069461.47070319	2.10432	0.00105772	2.22753	7.26036e-05
chr12.13123662.13124516	1.86146	0.00493082	1.8629	0.00436774	chr18.12017952.12018535	1.97063	0.00263651	1.98482	9.63015e-05	chr11.47095510.47096339	3.55781	3.65536e-10	2.21059	0.00268964
chr12.13433912.13434764	2.1743	0.00282472	1.93158	0.00762238	chr18.12318030.12318730	1.74443	0.00711663	1.7585	0.000520328	chr11.47109937.47110920	1.64577	0.00087618	2.486	6.49966e-12
chr12.13698681.13700421	1.93075	8.98871e-05	2.22423	1.5678e-06	chr18.12468026.12469056	2.03453	0.00165977	1.72545	0.00079209	chr11.47154721.47155354	2.63192	0.000108672	1.96487	0.000275947
chr12.13831777.13832108	2.23353	0.00758178	2.52388	0.00377515	chr18.13401374.13402263	1.96359	0.000765996	2.10247	1.23429e-06	chr11.47238370.47239167	2.38308	0.000950216	1.72864	0.00239654
chr12.14082737.14083426	1.96017	0.00719689	2.34369	0.00175611	chr18.13809757.13810693	1.96159	0.000738294	2.03369	3.28145e-06	chr11.47264030.47264952	3.05347	1.79229e-06	2.56978	1.09111e-07
chr12.15760853.15762186	2.40888	1.06123e-05	2.81106	1.80871e-07	chr18.15543945.15544839	3.07119	1.58164e-07	1.19944	0.00149367	chr11.47269771.47270703	3.64579	1.13463e-13	2.41472	5.94991e-05
chr12.15831983.15833278	1.42989	0.00823868	2.78006	2.40292e-07	chr18.16348267.16349224	1.93816	0.00415943	1.59201	0.00242682	chr11.47282634.47283261	3.41535	1.6645e-05	2.80999	7.48431e-06
chr12.16006288.16007202	2.04854	0.00308003	1.86958	0.00620822	chr18.16389892.16390545	2.70882	5.60404e-06	2.60055	9.71777e-09	chr11.47385635.47386549	2.42624	0.000242869	1.74311	0.000667366
chr12.16383426.16384020	1.86411	0.00916411	3.02765	1.95791e-05	chr18.21136837.21137336	1.99258	0.000722649	1.96372	8.34619e-06	chr11.47405790.47406611	2.1734	0.00118333	1.65601	0.00251746
chr12.16844662.16845557	1.74915	0.00348627	2.54657	2.75352e-05	chr18.21945576.21946198	2.82065	8.73941e-06	3.25185	1.5677e-09	chr11.47592442.47593530	1.45457	0.00972862	1.55598	0.000287568
chr12.17159229.17160007	2.87768	1.32015e-05	3.35605	1.39797e-06	chr18.23795327.23796090	2.6922	0.000377448	1.6428	0.00346693	chr11.48458929.48460037	2.13728	0.000253059	2.55087	8.8483e-08
chr12.17163980.17164272	2.73645	0.00475063	3.23129	0.00224199	chr18.24360400.24361145	2.78218	8.30197e-06	2.83279	9.66947e-10	chr11.48697021.48697806	1.83025	0.00490577	1.75937	0.000910411
chr12.17216665.17217110	2.72867	0.000521658	3.46879	5.66653e-05	chr18.25672006.25673050	1.97675	0.00125451	1.23296	0.00587559	chr11.49095217.49095914	2.85199	5.56054e-05	1.91591	0.00026481
chr12.17220536.17221024	1.99517	0.00745498	2.50198	0.00353543	chr18.26112065.26112549	2.42104	0.000990257	1.80974	0.00224945	chr11.49259868.49261032	2.61579	2.26774e-07	1.69591	1.9013e-07
chr12.17241462.17242343	1.86749	0.00567293	1.82184	0.00767058	chr18.26738693.26739862	1.8523	0.00174434	1.22165	0.00435407	chr11.49609066.49610721	1.94003	0.000169467	1.43869	7.12822e-05
chr12.21220271.21221144	2.05735	0.00373995	2.55888	0.000427585	chr18.27996928.27997854	1.94745	0.00377019	1.38278	0.00911626	chr11.50628716.50629569	2.26768	0.000183675	1.50577	0.000639933
chr12.24872291.24873152	2.04397	0.00479451	2.17892	0.00224377	chr18.29103632.29104649	1.77046	0.00145337	2.57421	1.43327e-11	chr11.50734122.50735120	2.53231	8.15565e-07	2.23325	5.21986e-09
chr12.25531580.25532015	2.36585	0.00592957	2.68215	0.00339717	chr18.29124107.29125440	1.52762	0.00932899	2.00839	5.03435e-06	chr11.51011777.51012312	2.3791	0.00267676	1.98072	0.00231544
chr12.25762861.25763523	2.26685	0.00488491	2.11156	0.00889046	chr18.29298313.29299791	1.72904	0.00317273	2.58563	6.42793e-15	chr11.51027710.51028428	3.44385	8.84076e-08	2.87237	1.1914e-09
chr12.25982488.25983260	2.18458	0.00589213	2.5827	0.00164373	chr18.29390395.29391385	1.51997	0.00478023	2.94829	4.32371e-12	chr11.51035973.51036488	2.57424	0.000948066	1.6562	0.00773679
chr12.26099090.26099911	2.7751	0.000792675	2.49848	0.00258947	chr18.30084710.30085703	2.66004	1.00405e-05	1.51573	4.02821e-05	chr11.51369170.51369889	3.03047	1.47198e-05	1.67991	0.00098683
chr12.26163402.26164356	2.13283	0.00264557	1.95888	0.00497538	chr18.31179868.31180815	1.56364	0.00831097	1.58542	0.000320012	chr11.51648666.51649439	2.18707	0.000232051	1.38228	0.0011877
chr12.26186976.26187518	2.81363	0.00239537	2.8298	0.00415238	chr18.31338359.31339091	1.94495	0.00409798	1.84942	0.000530186	chr11.51955950.51956533	2.53599	0.000808802	1.8463	0.00264828
chr12.27417596.27418156	2.25044	0.00930625	2.59945	0.00430094	chr18.31383264.31384294	2.42904	0.000555473	1.558	0.00722853	chr11.52337495.52338153	2.1989	0.00284493	1.83738	0.00185484
chr12.28331435.28332425	1.75224	0.00593297	1.86618	0.00304122	chr18.33143956.33144763	2.05161	0.00279145	1.45694	0.00719513	chr11.52676833.52678043	1.983	0.000730415	1.89967	1.09243e-05
chr12.28494101.28494736	2.51118	0.000728917	2.77448	0.000306579	chr18.35115768.35116254	2.2145	0.00642521	3.19312	1.92544e-05	chr11.53109357.53110123	2.58178	0.00060683	2.80172	9.02215e-06
chr12.28575207.28576251	2.08696	0.00332482	2.18494	0.00265974	chr18.35309045.35309764	1.92901	0.00822207	2.90445	1.41641e-05	chr11.53240966.53241469	2.35042	0.00151347	2.87096	1.05523e-05
chr12.28587802.28588345	1.80174	0.00582906	2.54667	0.000376833	chr18.37081729.37082326	2.46386	0.00265557	2.12392	0.00253033	chr11.54345036.54345836	2.77854	8.51213e-06	1.52271	0.000783865
chr12.29140961.29142037	1.52216	0.00371483	1.60624	0.00118029	chr18.39217091.39217629	2.23199	0.00141793	1.97413	0.000554061	chr11.55488510.55488968	2.09982	0.00362913	2.0153	0.00162063
chr12.29297822.29298381	3.00898	0.000604369	3.39591	0.000511773	chr18.39919304.39920315	2.33883	9.33417e-05	2.09556	3.66855e-06	chr11.56308063.56308929	2.00204	0.00397571	1.67855	0.00140459
chr12.29755057.29756334	1.62468	0.00397147	1.53547	0.00610886	chr18.40262880.40263483	1.93278	0.00513715	2.30064	6.78825e-05	chr11.56318393.56319248	3.84227	3.96616e-09	2.90441	2.99871e-10
chr12.30346513.30347131	2.20871	0.00229772	2.23205	0.00188414	chr18.40531543.40532290	2.12008	0.00337741	1.63094	0.00567608	chr11.56357606.56358396	2.59078	0.000919095	1.82328	0.00563018
chr12.30635021.30636051	1.93235	0.00184225	2.02863	0.000985042	chr18.41526679.41527535	2.2523	0.00141294	1.76075	0.00218763	chr11.56442293.56442817	4.37084	1.45622e-08	2.39309	8.70533e-07
chr12.31012234.31012797	1.98838	0.00718114	2.22791	0.00319449	chr18.42034754.42035392	2.55497	0.000206137	2.74813	8.00097e-07	chr11.56519764.56520305	3.07039	0.000182841	2.78177	3.02579e-05
chr12.31546022.31546569	3.78224	9.90084e-06	3.21429	0.000102751	chr18.42053383.42054055	1.759	0.0038287	1.92825	0.000189276	chr11.56570655.56571082	4.71576	2.69317e-07	1.61466	0.00436703
chr12.31965686.31966588	2.486	0.000216994	3.07055	3.21844e-05	chr18.43003943.43004592	2.41013	0.000699024	1.80957	0.0016755	chr11.56620154.56620598	2.27487	0.00601161	2.37437	0.00127143
chr12.32021534.32023085	1.88208	0.00141212	2.14999	0.000173928	chr18.43244120.43245112	2.73976	1.72803e-06	1.43783	0.000115599	chr11.56807381.56808549	2.5617	5.65512e-05	2.59222	4.74006e-08
chr12.32305856.32306824	2.29498	0.00012229	2.65945	8.06602e-06	chr18.43263356.43264188	2.55044	0.00159782	1.85361	0.00607236	chr11.56871250.56872203	1.67141	0.00585567	1.23177	0.00571472
chr12.34497546.34498201	1.74814	0.00337132	2.04253	0.000439069	chr18.43342696.43343591	1.90509	0.000640325	1.04228	0.00689491	chr11.57081533.57082241	2.21577	0.00192894	1.83051	0.00175547
chr12.34835919.34836845	1.83021	0.00532808	1.79896	0.00442548	chr18.43956624.43957093	2.21813	0.00370265	1.67304	0.00941141	chr11.57320799.57321750	2.78841	7.00223e-07	1.91959	2.71813e-07
chr12.35407895.35409033	1.7958	0.00128652	2.81215	6.86284e-07	chr18.43960521.43961084	2.09281	0.00821075	1.83116	0.0071139	chr11.57373804.57374522	3.06314	2.40247e-05	3.3706	1.4671e-08
chr12.36092690.36093796	1.64719	0.00124463	2.21623	5.21809e-06	chr18.45896445.45897520	1.74048	0.000245141	1.33333	7.71312e-08	chr11.57482214.57482757	2.53887	0.00140908	2.40049	0.000597118
chr12.37317032.37317600	2.37797	0.00259211	2.51583	0.00236947	chr18.46112626.46113799	1.52776	0.00553837	1.00605	4.81859e-05	chr11.57566196.57567227	1.81363	0.000834819	1.53041	6.23334e-05
chr12.38295262.38295686	3.21544	0.00044092	3.08128	0.00120596	chr18.46450294.46451033	3.45309	2.53771e-07	2.4771	4.5009e-07	chr11.57573464.57574297	2.90837	1.13099e-05	1.66865	0.00112674
chr12.38317891.38318716	2.22054	0.000528691	2.15292	0.00070513	chr18.47001932.47002818	2.28776	0.00114378	1.72176	0.00200722	chr11.57617599.57618503	1.99338	0.000359423	1.57789	0.000222636
chr12.38356235.38357083	2.54986	3.324e-05	3.73091	3.91807e-08	chr18.47471890.47472778	2.44886	0.000212327	2.06762	5.32625e-06	chr11.57681958.57682489	2.8167	3.06147e-05	1.36129	0.00797888
chr12.38497314.38497772	2.08905	0.00682205	2.05195	0.00848488	chr18.48543604.48544150	1.92228	0.00551016	1.6119	0.00340693	chr11.57696034.57697330	1.66707	0.000850612	1.08542	0.000303035
chr12.38749823.38750577	2.42025	0.00260272	2.28781	0.00484569	chr18.48608707.48609704	2.16447	0.00252165	1.43089	0.00901186	chr11.58271650.58272075	2.03254	0.00881345	2.10586	0.0014597
chr12.38931634.38932552	1.74896	0.00746243	2.84337	5.22002e-05	chr18.49325500.49326595	2.24845	7.95357e-05	1.73149	1.63023e-05	chr11.58400112.58400623	2.18664	0.00175377	2.08323	0.000462976
chr12.39979060.39980285	2.15969	0.000140594	2.78623	1.2315e-06	chr18.51688500.51689390	2.64093	1.58056e-05	2.05255	7.69379e-06	chr11.59644874.59645400	3.62761	5.10382e-06	1.60631	0.00470607
chr12.40046737.40047514	2.32258	0.000619119	2.95537	4.31611e-05	chr18.52438687.52439494	2.62462	0.00175775	2.04204	0.0047918	chr11.60182179.60183563	1.9667	5.77185e-05	1.09549	0.000468246
chr12.40231433.40232542	1.95623	0.00501703	1.89822	0.00560738	chr18.52550660.52551232	2.82416	5.59271e-05	2.35609	2.39948e-05	chr11.63190654.63191717	2.53862	2.26554e-06	2.28208	4.68948e-10
chr12.40789445.40790032	1.97325	0.000466389	2.65179	7.1317e-06	chr18.52870842.52872319	3.12585	5.53869e-09	1.71451	1.92853e-07	chr11.63201984.63202769	2.45813	0.00131714	2.15717	0.000409032
chr12.41248119.41249050	1.69154	0.00651434	1.95129	0.00122046	chr18.53704651.53705276	2.41507	0.00127469	1.5466	0.00900181	chr11.63377339.63378014	2.34214	0.000952251	2.04105	0.000461596
chr12.41539881.41540562	2.12385	0.001354	1.74082	0.00672996	chr18.55446899.55447665	2.6814	6.1524e-05	1.52641	0.000726306	chr11.63599785.63600595	3.81457	3.88212e-10	2.88086	7.12392e-05
chr12.41949576.41950321	1.87393	0.00293277	2.11302	0.00113952	chr18.55909771.55910898	1.70391	0.00191435	1.65903	1.2331e-05	chr11.63630048.63630872	3.36522	4.81445e-09	2.6643	4.9805e-10
chr12.42147999.42148428	2.63461	0.000789838	2.44058	0.0022725	chr18.56899653.56900655	2.20193	0.00187874	1.76067	0.00097147	chr11.63731022.63731753	2.11085	0.00354781	1.95277	0.00144469
chr12.43641028.43642208	2.13715	0.00044864	2.7046	1.17036e-05	chr18.56941947.56943145	2.2633	0.000872486	1.52122	0.00366836	chr11.63785221.63786262	2.28424	0.000278221	1.48111	0.002713
chr12.43899290.43899957	2.38132	0.000989867	3.08901	4.64659e-05	chr18.56987786.56988703	1.78261	0.00882425	1.81834	0.000740056	chr11.63962230.63963153	2.12802	0.000354474	1.73467	0.000222509
chr12.44099114.44099719	2.4176	0.00104749	2.51922	0.000805528	chr18.58221063.58221911	2.56871	4.02436e-05	2.17398	2.78317e-06	chr11.64950675.64951661	3.66749	4.76449e-08	2.54915	3.06034e-07
chr12.44145133.44145770	2.3657	0.000666575	1.98067	0.00345079	chr18.59106416.59107658	2.42537	2.68153e-05	1.65079	4.43616e-05	chr11.65025962.65026614	2.34642	0.000183794	3.01101	1.26557e-08
chr12.44380528.44381437	1.47797	0.00583334	2.66728	8.00112e-07	chr18.59859921.59861135	1.61002	0.00758383	1.33865	0.000606942	chr11.65102528.65102933	2.92509	0.000255207	2.02421	0.00165486
chr12.45012844.45013826	1.77702	0.0011268	2.14374	4.81393e-05	chr18.61227320.61228174	3.06095	2.95021e-05	1.88408	0.000818077	chr11.65139573.65140265	2.57211	0.000139267	2.14881	1.62637e-05
chr12.46040131.46041183	2.25303	0.000262391	2.07991	0.000425499	chr18.61805742.61806589	2.25368	0.000679866	2.48009	4.77919e-06	chr11.65257487.65258380	2.77178	4.39998e-08	2.18627	3.20538e-10
chr12.46333261.46333996	2.38343	0.000499148	2.55058	0.000273891	chr18.61824626.61825185	1.7619	0.00465386	1.67362	4.73955e-05	chr11.65927661.65928798	2.27837	7.62345e-06	2.01818	1.58554e-08
chr12.48671819.48672368	2.40113	0.00444458	2.78261	0.00230631	chr18.62121923.62122836	2.57609	1.19896e-05	1.94755	4.03955e-06	chr11.65964738.65965194	2.37701	0.00562224	2.5853	0.000492685
chr12.48680867.48681472	2.10492	0.00759958	2.5294	0.00214626	chr18.62432079.62432791	2.97536	0.000168972	2.10008	0.00109019	chr11.65993449.65994447	3.11606	1.39789e-08	2.98872	1.34501e-10
chr12.48811236.48811595	2.3059	0.0087519	2.42888	0.00761966	chr18.62459608.62460430	2.21963	0.000795566	1.90459	0.000280605	chr11.66046107.66046945	1.97649	0.00146402	1.61039	0.000963814
chr12.50080561.50081935	2.37935	0.000182569	2.04976	0.00137753	chr18.63148810.63149555	2.20356	0.00337741	1.67445	0.00656175	chr11.66066953.66067767	4.12443	8.6031e-14	3.37005	9.27024e-18
chr12.50258440.50259609	2.24316	0.000228625	2.48199	5.14724e-05	chr18.64221149.64221810	2.45215	0.000185223	1.48924	0.00285945	chr11.66116474.66117175	3.78196	1.85728e-08	2.4709	8.37242e-08
chr12.51241048.51241769	1.99103	0.000882678	2.26889	0.000181934	chr18.65028524.65029111	1.91021	0.00280271	2.27051	2.27622e-06	chr11.66266994.66267551	3.02065	3.34096e-06	1.59139	0.000661723
chr12.51242663.51243216	2.48826	0.000429136	2.45795	0.000572467	chr18.66536040.66537562	2.25695	2.90047e-05	2.03563	3.98265e-08	chr11.66286738.66288104	1.71243	0.00410015	1.34244	0.00395549
chr12.51294532.51295629	1.90054	0.000702711	1.68716	0.00273752	chr18.67165551.67166083	3.3905	4.57291e-07	1.32542	0.00247009	chr11.66344599.66345599	1.68582	0.000827663	1.57498	1.56134e-06
chr12.51494167.51495206	2.4398	0.000663693	2.76234	3.49104e-05	chr18.67209769.67210184	2.00406	0.0028058	2.24116	8.55033e-05	chr11.66348451.66349135	4.22722	2.56622e-10	2.48178	0.00320756
chr12.51990506.51991497	2.27896	0.000967199	2.51033	0.000206357	chr18.67263269.67263922	1.8741	0.00195767	2.13098	4.02366e-06	chr11.66387333.66388472	2.00355	0.000318322	1.05714	0.00933093
chr12.52353942.52354606	1.92822	0.00384006	2.40681	0.000412888	chr18.68154088.68154763	1.79332	0.00971134	1.72328	0.00247061	chr11.66560496.66561442	1.69318	0.00702942	1.84826	0.000198266
chr12.52639076.52639473	2.88065	0.00109796	2.67022	0.00165697	chr18.69067348.69068211	2.92874	0.000161268	1.8224	0.00180627	chr11.66745235.66746143	2.78921	4.80146e-05	1.63631	0.00169226
chr12.54222961.54223836	1.9399	0.00663438	2.62531	0.000171515	chr18.69107490.69108354	3.56143	4.44897e-06	1.82459	0.00131846	chr11.66762329.66763983	1.96825	0.000168177	1.865	6.96663e-07
chr12.55563485.55564341	2.02909	0.00369286	3.2671	1.79353e-05	chr18.72611020.72611764	3.38353	1.46887e-07	1.96975	1.4088e-06	chr11.66868220.66869026	2.70289	0.000136836	2.14093	0.000155341
chr12.56143483.56144974	2.73587	2.09775e-05	3.51519	1.5884e-07	chr18.72803249.72803968	2.75061	0.000359891	1.63037	0.00760137	chr11.67044345.67045214	3.69162	1.0693e-09	2.81367	5.14239e-10
chr12.57852743.57853242	3.1419	8.5025e-05	2.02273	0.00618585	chr18.73723605.73724290	2.4926	0.00218373	2.10758	0.00259181	chr11.67177118.67177568	2.84243	0.000935886	2.39085	0.000728221
chr12.58139027.58139537	2.85236	0.000151609	3.01894	7.33854e-05	chr18.74515436.74516417	3.00606	1.29362e-07	2.43926	2.97908e-09	chr11.68113336.68114723	2.06589	0.000180604	1.23214	0.000887618
chr12.58426122.58427308	1.58052	0.00409516	2.72721	8.03079e-07	chr18.74649724.74650398	2.62766	0.000220614	1.95093	0.000772999	chr11.68144809.68145928	2.38926	9.21234e-05	2.08456	1.62533e-05
chr12.58441824.58442515	2.34947	0.000113763	2.40577	7.26667e-05	chr18.74737486.74738170	1.81838	0.00819157	1.77366	0.00177153	chr11.68194076.68194411	2.20588	0.00632247	2.03232	0.00312936
chr12.59117137.59117686	2.80524	1.78394e-05	3.01178	1.13643e-05	chr18.76426975.76428004	1.95282	0.00358613	2.14109	9.92814e-05	chr11.68201943.68202983	2.97267	1.56147e-06	2.33778	1.00438e-07
chr12.59249894.59250851	1.99986	0.00624929	2.32878	0.00156535	chr18.77378506.77379354	1.86188	0.00687396	1.50841	0.00790889	chr11.68315473.68316313	2.78932	4.57304e-05	2.16948	5.3387e-05
chr12.59414226.59415790	2.07144	0.000119917	2.56884	1.25248e-06	chr18.77602844.77603633	2.06021	0.00115758	2.16352	2.57394e-05	chr11.68651401.68651944	1.8176	0.00990736	2.33434	0.00022921
chr12.61806979.61807742	2.20895	0.00119187	2.55495	0.000637191	chr18.78078446.78079074	2.84029	0.00045646	2.0141	0.00261137	chr11.68812992.68813531	2.71786	6.06374e-05	2.9306	3.21327e-07
chr12.62234648.62235029	2.86594	0.00104309	2.26275	0.00908412	chr18.79188734.79189515	1.65615	0.0099196	1.65372	0.000733707	chr11.69800499.69801267	1.46255	0.0067078	1.66685	2.22532e-05
chr12.62380150.62380905	2.24383	0.00375445	2.26178	0.00478964	chr18.79852136.79852828	2.45362	0.00359182	1.95088	0.00750838	chr11.71446292.71447110	1.92584	0.00878021	2.10161	0.000839493
chr12.62441893.62442790	2.0126	0.00927776	2.0442	0.0081296	chr18.80262236.80263068	1.98929	0.000349044	2.36222	2.79523e-09	chr11.71492803.71493411	4.28298	1.4945e-06	3.13588	1.83191e-06
chr12.63534059.63534673	2.55234	0.000756281	3.16492	7.37794e-05	chr18.82634597.82635425	2.41292	0.000257399	1.19495	0.00935644	chr11.71794137.71795066	2.34387	0.000216063	2.0644	4.45935e-05
chr12.63791634.63792691	2.5502	2.44299e-05	2.55238	2.227e-05	chr18.83097386.83098063	2.45889	0.000521872	1.77587	0.00168763	chr11.71904402.71905276	1.95662	0.00219563	1.73144	0.000827836
chr12.63962422.63963462	2.40024	0.00027465	2.473	0.000206893	chr18.83126741.83127689	3.32981	1.75111e-08	2.90046	1.45815e-12	chr11.72367760.72368775	2.0729	0.00596541	1.89411	0.00160134
chr12.64540835.64541812	1.82698	0.00202228	2.65132	1.27204e-05	chr18.84002683.84003316	3.27353	2.81681e-05	2.10934	0.000872876	chr11.74493799.74494450	3.19422	2.9841e-05	1.89037	0.00115416
chr12.65390190.65390968	1.94813	0.0026224	2.29997	0.000220095	chr18.84306999.84307664	2.07636	0.00197563	1.48312	0.00358475	chr11.78322418.78323385	1.54275	0.00538766	1.2157	0.0017312
chr12.67016852.67017563	1.66318	0.00945925	2.22196	0.000680427	chr18.84513403.84514427	2.07918	0.000683553	1.72163	0.000208002	chr11.81085205.81085632	3.18424	5.69297e-07	3.12383	2.65863e-09
chr12.68402113.68403627	1.92521	0.00702126	2.27112	0.00374807	chr18.84724689.84725193	3.22258	6.2231e-07	2.65156	5.22888e-08	chr11.81517898.81518575	3.55336	1.50245e-08	2.55614	2.21527e-08
chr12.70015799.70016468	2.71765	6.63116e-06	3.09675	4.4816e-07	chr18.84758071.84759029	2.46487	0.000283934	1.72166	0.00116363	chr11.81721369.81722472	1.48709	0.00291741	1.72993	3.78809e-07
chr12.70242482.70242910	2.04028	0.00832976	2.00608	0.00951836	chr18.84892204.84893136	2.02419	0.00058627	1.47498	0.000247713	chr11.81771198.81771982	1.85791	0.00516284	1.28836	0.00934133
chr12.70262044.70263034	1.93699	0.000107313	2.35907	7.93749e-07	chr18.84927473.84928233	1.65894	0.00337918	3.22893	9.87375e-13	chr11.81905587.81906411	2.19779	0.0040875	1.66551	0.00912802
chr12.70624180.70625008	2.23237	0.00182376	3.12605	1.10453e-05	chr18.85424452.85425385	1.64045	0.00647361	1.93431	1.50406e-05	chr11.82339799.82341169	1.43843	0.00406918	1.13002	5.97304e-05
chr12.70628328.70629336	1.98325	0.00383585	2.39027	0.000275438	chr18.85451064.85451577	2.10958	0.00337694	1.74311	0.00341893	chr11.82475783.82476557	3.25248	1.88089e-06	2.49331	1.14909e-06
chr12.70727453.70728344	2.05124	0.00458964	3.602	9.40397e-06	chr18.85674103.85675002	2.10376	0.00090361	2.1187	3.964e-05	chr11.82480866.82481450	2.44626	0.00104416	1.71058	0.00420396
chr12.70852902.70853575	2.38023	0.000987323	2.6153	8.76922e-05	chr18.86158096.86158989	1.79445	0.00909969	1.38764	0.00672237	chr11.82592519.82593032	2.90292	0.000102863	1.83805	0.00132858
chr12.71283069.71283506	3.23693	0.000141983	3.06582	0.000358802	chr18.86344643.86345389	2.11988	0.00349814	1.54587	0.00903263	chr11.82812766.82814567	2.28982	8.18046e-05	2.06545	1.5977e-05
chr12.71391331.71392085	2.30119	0.00298288	2.2159	0.00414504	chr18.87048672.87049321	2.23075	0.00435431	1.8124	0.0077564	chr11.83816894.83817488	2.89228	0.000467997	2.12122	0.00149989
chr12.72128943.72129588	2.62966	0.000927594	3.08323	0.000268766	chr18.87120774.87121740	2.19453	0.000122276	2.81157	1.20543e-09	chr11.86874579.86875253	2.65495	7.86273e-06	1.27934	0.0016629
chr12.72538520.72538943	1.83543	0.00894378	2.76874	0.000186858	chr18.87763979.87765025	2.55242	0.000151519	2.25842	1.81265e-05	chr11.86876224.86876860	3.73204	1.11326e-07	1.45	0.000700306
chr12.73531729.73532424	2.43156	0.000685096	2.67915	0.000384045	chr18.88762745.88764053	2.32513	2.8533e-05	1.66846	1.36223e-06	chr11.88356600.88357334	2.23456	0.000141335	1.349	0.00156834
chr12.73558224.73559101	2.72035	0.000230879	2.96207	0.000246241	chr18.89030465.89031881	2.39125	7.9017e-05	1.89728	1.72485e-05	chr11.88394504.88395324	1.50629	0.00498274	1.44494	0.000245279
chr12.73725702.73726512	2.23255	0.000531479	3.71713	4.3698e-07	chr18.89209959.89210814	2.47607	0.000170835	2.52741	9.38101e-07	chr11.88547374.88548360	2.4567	3.11188e-05	1.38463	0.00128956
chr12.74791869.74792881	1.7277	0.00898097	2.16292	0.000802361	chr18.89847118.89847991	2.26792	0.00211123	2.02447	0.00081089	chr11.88655675.88656226	2.78868	5.06992e-05	2.0413	0.000189002
chr12.75036666.75037118	3.16568	0.000258697	2.95324	0.000960682	chr19.4196087.4196933	2.03362	0.00140848	1.84836	0.000185543	chr11.88670264.88670941	2.61901	0.000129107	1.61623	0.0027655
chr12.75064491.75064866	2.72064	0.00207365	3.19221	0.000773652	chr19.4488749.4489260	2.6689	0.00152654	2.45242	0.000806807	chr11.88909477.88910364	3.23215	3.42172e-07	1.60966	0.000393707
chr12.75076714.75077532	2.44022	0.000231861	2.79362	3.53809e-05	chr19.6315556.6316267	1.9584	0.00213261	1.44515	0.00324047	chr11.89388788.89389704	3.22771	3.196e-06	2.10608	4.8405e-05
chr12.75100503.75101091	1.85429	0.0092473	2.64713	0.000165729	chr19.10461566.10462011	2.51823	0.000365903	2.29337	6.40443e-05	chr11.89397909.89398517	3.00678	5.48592e-05	2.14668	0.000143001
chr12.75182587.75183334	2.00819	0.00405238	2.49	0.000662715	chr19.14300987.14302043	2.38525	0.00153264	2.16292	0.000585664	chr11.89485691.89486644	2.08388	0.00212942	1.69469	0.000986505
chr12.75290481.75291169	2.3127	0.00111566	2.31136	0.00129017	chr19.14307692.14308752	1.98439	0.00740094	1.84524	0.000880653	chr11.89524650.89525482	2.5144	0.000113627	1.88002	0.000167074
chr12.75540389.75541760	1.45347	0.00841814	1.44366	0.00523873	chr19.14325386.14326370	3.23418	1.76042e-06	1.90003	6.78762e-05	chr11.89532377.89533112	2.70244	1.41034e-05	2.52547	1.88246e-06
chr12.75789425.75789939	2.50514	0.00186319	3.7371	6.54515e-05	chr19.17959517.17960531	2.73889	6.42011e-05	1.96298	0.000262324	chr11.89871717.89872440	2.6794	0.000216649	1.89509	0.00100037
chr12.76942326.76943344	1.82477	0.00603921	2.06562	0.00137703	chr19.22008138.22008964	3.11747	5.73286e-07	1.47012	0.000805257	chr11.89932017.89933147	2.04271	0.000186607	1.30775	0.00122183
chr12.77025366.77025995	2.09091	0.00774583	1.99643	0.0087867	chr19.22825233.22826532	2.55785	3.6705e-07	1.11352	9.0112e-05	chr11.90289926.90290371	2.56438	0.00149328	2.68995	0.000104734
chr12.77223675.77224060	2.52461	0.0060587	2.66061	0.00617694	chr19.24241889.24242919	2.20034	0.000749135	1.58411	0.00154354	chr11.90463646.90464568	2.01524	0.000442802	1.92602	4.59741e-06
chr12.77466152.77466652	2.75886	0.000596428	2.29498	0.00614055	chr19.25727469.25728435	2.10878	0.000642729	1.86573	0.000172016	chr11.90520706.90521945	1.33936	0.00574103	1.27781	6.59775e-05
chr12.77807310.77808560	1.5403	0.00928104	2.31538	8.67303e-05	chr19.26952131.26952826	2.90236	4.03547e-05	1.98512	0.000304504	chr11.90555239.90555780	3.23145	1.42608e-05	1.91126	0.00144599
chr12.77911932.77912512	2.33746	0.00307679	2.69927	0.00116319	chr19.27099806.27100471	2.83896	4.42724e-05	1.52097	0.0033389	chr11.90603878.90604978	2.55023	0.00025461	2.07561	0.000374861
chr12.78788239.78789152	1.96301	0.0080073	2.58164	0.00046151	chr19.27312433.27313564	2.13767	0.000191983	1.39672	0.000672845	chr11.90632509.90633182	3.01777	2.33376e-06	2.63933	8.55821e-08
chr12.79301822.79302193	2.35953	0.00850296	3.18111	0.0015065	chr19.27384954.27386043	2.48985	3.5948e-05	1.95905	1.08164e-05	chr11.90740233.90741608	2.03855	0.00180018	1.37759	0.00622241
chr12.80414926.80415523	1.88211	0.00665162	2.82608	0.000113307	chr19.27585220.27586411	2.69497	2.93552e-06	2.49971	6.42068e-09	chr11.91668336.91669148	2.24877	0.00294849	1.90602	0.00393014
chr12.81894362.81894723	2.06334	0.00718528	2.13208	0.00745582	chr19.28332947.28333841	1.78881	0.00195793	1.78114	2.45914e-06	chr11.91779709.91780040	2.38866	0.0021285	1.71787	0.00769397
chr12.82121907.82122870	1.75899	0.00723911	2.04859	0.00225886	chr19.28940058.28940956	1.66573	0.00308468	1.87804	2.30392e-07	chr11.92362589.92363251	2.00406	0.00305042	2.02492	0.000297894
chr12.82664327.82665183	2.34931	0.000877484	2.01976	0.00335369	chr19.28943664.28944315	3.01323	2.96501e-06	2.95383	2.44255e-09	chr11.92764031.92764929	2.55894	0.000330915	2.38763	4.95329e-05
chr12.82905357.82906210	1.8687	0.00213876	2.108	0.000479867	chr19.29060552.29061351	2.46765	0.000441314	1.82854	0.00128584	chr11.93394385.93394766	3.30849	0.000257985	2.37973	0.00103126
chr12.82998619.82999400	2.41472	0.0015936	2.58226	0.00259737	chr19.31044488.31045669	1.79338	0.00324303	1.31087	0.00358192	chr11.93695798.93696752	3.14318	1.07346e-06	2.38664	2.90581e-06
chr12.83594693.83594990	2.94269	0.000416323	3.2391	0.000275433	chr19.31828224.31828830	2.5648	0.000991804	1.81973	0.00425513	chr11.93728723.93729497	2.41364	0.000548863	2.16935	0.000177343
chr12.83874432.83875247	2.88295	6.96162e-05	1.75204	0.00887845	chr19.34099649.34100482	1.98895	0.00122793	1.90709	9.40079e-05	chr11.93765041.93765649	1.79951	0.00558172	1.7545	0.000767565
chr12.84071612.84072064	2.18462	0.00797774	2.88385	0.00137037	chr19.34776201.34776891	2.66407	5.94929e-05	1.82954	0.000195573	chr11.93778674.93779476	2.75942	1.39951e-06	1.50771	0.000208781
chr12.84755974.84756506	2.83712	2.28926e-05	3.47813	1.53405e-06	chr19.35154738.35155488	2.25543	0.00375927	1.67857	0.00824331	chr11.95411381.95411762	2.62124	0.000101922	1.69569	0.00112913
chr12.85563297.85563855	1.80313	0.00735204	2.36879	0.00145296	chr19.38212828.38213432	2.36398	0.00590774	2.05184	0.00372617	chr11.97434654.97435471	1.60757	0.00865116	1.33214	0.00645538
chr12.85603758.85604132	2.40454	0.000592913	2.36565	0.000605188	chr19.42311978.42312678	2.08613	0.00244737	2.25257	1.95612e-05	chr11.97570526.97571573	1.55447	0.00183242	1.39119	6.13999e-05
chr12.85610138.85610650	2.50475	0.000277003	2.47554	0.000386894	chr19.42713597.42714491	2.85093	2.74378e-06	2.51081	2.09052e-09	chr11.98297534.98298187	2.19247	0.000108018	2.12152	3.6196e-07
chr12.85736880.85737441	2.26371	0.00424277	2.9292	0.000209653	chr19.42736260.42737159	2.2417	0.000874265	2.21527	0.00018758	chr11.99378847.99380061	2.32532	4.28602e-05	1.93748	7.97366e-06
chr12.85952385.85952658	2.66326	0.0051084	2.60398	0.0080209	chr19.43550608.43551138	3.03725	0.000245008	1.80829	0.00751662	chr11.102257544.102258427	1.41271	0.0097524	1.6715	4.94157e-05
chr12.87040665.87041315	2.01013	0.0058073	2.91524	3.62544e-05	chr19.45253832.45254376	2.34145	0.00532214	2.93738	7.12392e-05	chr11.103822100.103823105	2.35099	1.17928e-05	1.29492	0.000265315
chr12.87457835.87458433	2.40087	0.00431396	2.54671	0.00307034	chr19.45530036.45530645	2.5109	6.37625e-05	1.42653	0.00149364	chr11.104127204.104127498	3.8803	1.51819e-06	4.24262	9.88717e-10
chr12.88368447.88369137	2.17061	0.000385107	3.14981	2.18952e-07	chr19.46846096.46847052	2.08966	0.000403084	2.44125	4.89734e-08	chr11.104140847.104141284	2.87875	0.00188998	2.8249	0.000302301
chr12.88707739.88708445	2.16855	0.00353637	2.97969	0.000224088	chr19.48644723.48645941	2.15815	0.000231064	1.63357	0.0001237	chr11.104160931.104161449	3.01328	1.09928e-06	2.19475	2.4168e-06
chr12.88713316.88714068	2.04497	0.00678258	2.37658	0.00256662	chr19.48768485.48769059	1.84579	0.00277531	1.33381	0.00247607	chr11.105545298.105546476	2.7635	1.77951e-05	1.85931	0.000193576
chr12.88939709.88940059	2.65007	0.00146154	2.58315	0.00228038	chr19.49612745.49613574	3.62114	6.9507e-07	1.57177	0.00216078	chr11.105582787.105583136	3.85459	3.82139e-05	2.89782	6.52974e-05
chr12.89024143.89024711	2.67957	0.000728909	2.96567	0.000536563	chr19.51053832.51054905	2.41141	0.000262255	2.08212	7.91949e-05	chr11.107946837.107947354	2.33148	0.000209481	1.88638	0.00013201
chr12.89082282.89082909	1.98493	0.00894034	2.04368	0.00780378	chr19.52112120.52113060	1.69839	0.00659953	1.32404	0.00427893	chr11.107973386.107974226	3.5279	1.14193e-09	2.67766	1.01461e-10
chr12.89284288.89285082	2.04351	0.00235311	2.5453	0.000190045	chr19.52176666.52177768	1.67587	0.0058815	1.75348	9.27631e-06	chr11.108002265.108003397	1.74848	0.00589852	1.86035	0.000601197
chr12.89653122.89653657	2.7866	5.57891e-06	3.13371	3.68314e-07	chr19.52705400.52706087	2.89082	2.8963e-05	2.12243	7.44268e-05	chr11.108038182.108038956	2.53676	1.05698e-05	3.18582	1.14271e-11
chr12.89722406.89722869	2.00849	0.00501718	2.26368	0.00326189	chr19.52835235.52835919	1.89958	0.0061756	2.05891	0.000263625	chr11.108090515.108091515	1.6589	0.00169228	2.63889	5.71559e-10
chr12.89723865.89724392	1.91389	0.00557488	2.47538	0.000481761	chr19.54855068.54856345	3.12435	1.67938e-07	1.39644	0.000332253	chr11.108245032.108246106	1.92826	0.00046912	1.82555	3.15832e-06
chr12.91972127.91972856	2.45219	0.000807887	2.95258	9.4792e-05	chr19.56300620.56301421	2.37116	5.04924e-05	2.04062	5.55969e-06	chr11.108862263.108862887	2.8516	1.96637e-05	2.27334	9.63855e-06
chr12.92126663.92128229	1.73015	0.0046758	2.74696	1.25344e-05	chr19.58255277.58256072	2.17173	0.00162145	2.75971	1.3552e-05	chr11.109193877.109194650	3.18265	2.29377e-05	2.42646	6.20793e-05
chr12.92188789.92189487	1.88492	0.00792013	2.64039	0.000465263	chr19.60380327.60381017	2.70375	0.000193034	2.39751	7.76771e-05	chr11.109328913.109329559	1.95077	0.00517271	1.62996	0.00547956
chr12.92283654.92284117	2.49002	0.00432866	2.93675	0.000982075	chr19.60509455.60510188	3.64364	3.18331e-07	1.85805	0.000200367	chr11.109705135.109706470	1.65219	0.00145411	1.86376	8.55262e-07
chr12.93342188.93343288	2.14125	0.0022184	2.47088	0.00028257	chr19.60615432.60616272	3.12624	3.89047e-06	2.90292	1.11324e-07	chr11.110034965.110035889	2.1482	0.00178167	1.51444	0.00718789
chr12.93812841.93813352	2.1979	0.00759949	3.02003	0.000940264	chr2.5288418.5289249	2.01215	0.00371483	1.6744	0.00295101	chr11.110293804.110294433	2.38059	0.00529603	2.3759	0.000618928
chr12.94670026.94670688	1.79693	0.00526893	2.94561	2.10039e-05	chr2.8014737.8015542	2.77474	3.87569e-05	2.61648	2.13809e-06	chr11.111030157.111030921	2.59453	0.000243715	1.78867	0.000657183
chr12.95302860.95303257	2.30523	0.00820614	2.68263	0.00353011	chr2.8415729.8416460	2.91547	2.02256e-05	1.65925	0.00113873	chr11.111086354.111087315	2.53465	9.42745e-05	2.26339	4.08487e-05
chr12.95315032.95315935	2.64128	2.98804e-06	3.81007	1.27584e-10	chr2.8452549.8453109	2.28457	0.00159904	1.48307	0.00993369	chr11.111180275.111181153	2.21967	0.00130629	1.46252	0.00599122
chr12.95455814.95456816	1.70064	0.00794751	1.64237	0.00972249	chr2.8818141.8818680	2.25099	0.00154809	2.48257	3.94919e-05	chr11.111273530.111274389	1.35045	0.00798631	1.20703	8.63351e-05
chr12.95538205.95539005	2.30048	0.00407072	2.75608	0.00114914	chr2.10937042.10938082	2.40475	6.64993e-05	1.71266	4.73927e-05	chr11.111528898.111530184	1.98863	3.05183e-05	2.31859	7.4487e-11
chr12.97024261.97025216	3.23447	7.34667e-06	3.0374	2.06938e-05	chr2.11243782.11244964	1.90161	0.00170146	1.16764	0.00826047	chr11.111556568.111557328	3.45024	1.45929e-07	2.33001	1.67129e-06
chr12.97455373.97456366	1.98802	0.00800123	2.3383	0.00403156	chr2.11321992.11322754	3.15026	8.40003e-06	2.83212	2.25514e-07	chr11.111953815.111954726	2.40416	0.000887464	2.23908	0.000151654
chr12.97501058.97501950	2.10817	0.000954245	2.65084	5.65745e-05	chr2.12156027.12156852	2.15367	0.000802593	2.32504	1.21105e-05	chr11.112054521.112055230	2.33157	0.000758961	2.01586	0.00047789
chr12.98337723.98338195	2.84561	0.000427302	2.21721	0.00530241	chr2.12325214.12326177	1.87382	0.000614345	2.19136	2.05409e-08	chr11.112329228.112329922	2.47284	0.000775881	2.84512	6.44568e-06
chr12.98343513.98344227	1.7079	0.00332225	3.28913	5.31748e-08	chr2.12553720.12554543	2.96517	4.53022e-05	2.51486	2.33474e-05	chr11.112628757.112629760	2.88514	1.36802e-06	2.16128	4.78836e-07
chr12.98458178.98459449	2.33222	0.00040906	1.69275	0.00755621	chr2.15335404.15336155	2.22984	0.00305546	1.69745	0.00497833	chr11.112996485.112997173	1.84326	0.00168708	2.43795	2.90791e-08
chr12.98479465.98480156	2.09288	0.00410705	1.9395	0.00749639	chr2.15594272.15595237	2.10732	0.00100458	2.19728	6.51299e-06	chr11.113120822.113121465	2.19041	0.000905188	1.92591	0.000266545
chr12.98907409.98908274	2.14794	0.00407297	2.65232	0.000660819	chr2.18822691.18823177	2.38291	0.00141283	1.60586	0.00778211	chr11.113170013.113170619	3.54411	5.64009e-09	3.44982	3.32743e-13
chr12.99015705.99016618	2.20156	0.000884341	3.14885	6.30506e-07	chr2.18947476.18948497	2.08179	0.000341766	1.7754	2.27309e-05	chr11.113184026.113184469	1.97417	0.00558201	2.18555	0.000479659
chr12.99665703.99666204	2.29085	0.00117366	2.56819	0.000394098	chr2.21898362.21898973	2.61666	0.000548653	1.88398	0.00208597	chr11.113309135.113309621	3.04179	0.000260729	2.36562	0.000440554
chr12.100875390.100876010	2.20955	0.00349494	2.05266	0.00601125	chr2.22670308.22671697	1.98075	0.00168203	1.31216	0.00361584	chr11.113385096.113385882	2.53849	7.96679e-06	1.90899	3.6167e-06
chr12.102055567.102056181	2.89352	3.89807e-05	3.96404	5.06473e-07	chr2.23440782.23441859	3.41515	6.33102e-07	2.66058	3.63998e-07	chr11.113483412.113483991	3.27126	2.31073e-06	1.75929	0.00041379
chr12.104185886.104186783	1.56208	0.00941762	2.65553	1.14336e-05	chr2.24654407.24654925	2.32118	0.00135502	1.99341	0.000826881	chr11.113512642.113513724	2.11376	1.7618e-05	1.41486	1.51366e-05
chr12.104297421.104298461	2.41022	0.000151609	2.86415	5.7561e-06	chr2.26462002.26462637	2.38992	0.00444996	2.6274	0.000600828	chr11.114251609.114252238	2.06979	0.00123508	1.75526	0.000584887
chr12.105982379.105983233	2.29209	0.00361745	2.24587	0.00379935	chr2.27314753.27315291	2.28388	0.00364151	2.07524	0.0012123	chr11.114265056.114265655	2.73683	0.000329735	2.73704	3.13408e-06
chr12.106357895.106358378	2.76749	0.000728917	2.60599	0.00158942	chr2.27321393.27322303	1.85569	0.00638415	1.51601	0.00621325	chr11.114269927.114271195	2.06307	1.83765e-05	1.69049	1.74828e-08
chr12.111527490.111528453	2.62448	6.4547e-05	3.77588	1.8571e-07	chr2.27565747.27566406	2.15564	0.000894808	1.36433	0.00889051	chr11.114296777.114297336	3.06319	7.93676e-05	2.4711	0.000100599
chr12.112117614.112118073	2.30479	0.0028985	2.48914	0.00192552	chr2.31448791.31449994	1.88821	0.00142668	1.60597	0.000233311	chr11.114437452.114438638	2.9596	4.11705e-09	2.42638	4.76373e-12
chr12.113106393.113106880	2.21996	0.0058815	2.83172	0.000901855	chr2.31797000.31797383	2.75664	0.00156335	2.07888	0.00492313	chr11.114464810.114465367	3.14479	2.69358e-05	1.88509	0.00213894
chr12.116663363.116664052	2.31079	0.00472629	2.79684	0.000540145	chr2.34027051.34027830	2.10315	0.000511597	1.77547	0.000104734	chr11.114495102.114496064	3.31227	2.09279e-09	1.60121	4.59182e-06
chr12.117127115.117127928	2.45874	0.000232964	2.39492	0.000332412	chr2.39890679.39891432	2.85849	3.95788e-05	1.97677	0.000200503	chr11.114526506.114527460	1.87433	0.000229021	1.28808	2.02274e-05
chr12.117501041.117501718	2.91751	6.95297e-05	2.86436	0.000119942	chr2.40982474.40983323	3.22084	1.6238e-05	1.56444	0.00497482	chr11.114543978.114544994	3.40358	1.02693e-09	1.55373	7.93214e-06
chr12.117527810.117529088	1.91453	0.000547866	3.1806	6.88435e-08	chr2.41323061.41323860	2.69003	8.86092e-05	2.14187	0.000123295	chr11.114560320.114561604	3.40659	1.04598e-09	2.83617	3.00054e-11
chr12.117661240.117662306	1.72014	0.0074675	1.8379	0.00355133	chr2.41685948.41686509	4.22291	4.98785e-08	2.97942	3.8405e-07	chr11.114567166.114568791	3.12515	1.09323e-09	2.68504	1.36788e-12
chr12.118373176.118373931	2.48685	0.000418247	3.13329	3.61784e-05	chr2.42546956.42547846	2.20596	0.00148786	1.5296	0.00600268	chr11.114618442.114619345	3.33255	5.92494e-07	1.861	0.000267712
chr12.118706328.118707166	2.56663	0.000264058	2.7948	0.000104557	chr2.42671387.42672086	2.16224	0.00397143	2.27365	0.000479438	chr11.114691639.114693122	4.04902	7.41301e-14	2.17426	1.04957e-09
chr12.119062499.119063801	2.0429	0.00326957	1.82839	0.00513201	chr2.45005922.45006750	2.90052	4.95506e-06	3.12772	6.91199e-10	chr11.115151450.115152535	3.67781	2.62568e-11	1.58364	4.5737e-06
chr12.119410280.119411076	2.31388	0.00428778	2.60852	0.00276658	chr2.48441047.48441850	2.44142	0.000553501	1.77445	0.00162063	chr11.115153697.115154373	1.71103	0.00157348	2.00623	9.44698e-07
chr12.119449974.119450577	2.53238	0.000191753	4.24143	2.87393e-07	chr2.50622175.50622899	2.52656	0.000328754	2.07696	0.000223768	chr11.115248304.115248570	2.37288	0.00175257	2.20637	0.000537919
chr12.119609268.119609754	2.9556	0.000329451	3.84451	3.38996e-05	chr2.50626701.50627270	2.96084	6.95297e-05	1.87729	0.00114208	chr11.115266004.115267523	1.93398	0.00014951	1.10514	0.00466373
chr13.3654168.3655038	3.33492	1.33399e-07	3.84021	8.65258e-09	chr2.50688319.50688910	2.1682	0.00588505	1.73055	0.00911852	chr11.117019276.117019922	3.52889	3.26284e-05	2.58463	2.97564e-05
chr13.3765489.3766272	1.95556	0.00330176	3.77021	1.34434e-06	chr2.54902756.54903722	2.48948	1.42337e-05	2.37822	1.51242e-08	chr11.117035312.117036236	3.12449	1.48689e-05	1.73718	0.00122848
chr13.3776184.3777039	2.95446	4.85783e-06	3.87223	1.38941e-07	chr2.55103216.55103954	2.88163	3.04562e-05	1.62208	0.00182491	chr11.119455844.119456523	2.73217	0.00103205	2.13745	0.000404741
chr13.5301950.5302785	2.19043	0.00350589	2.62007	0.000637901	chr2.55339325.55339912	2.376	0.00347338	1.83321	0.00791438	chr11.119884780.119885197	3.27885	0.000379828	2.86499	0.000147809
chr13.5491987.5493365	2.70085	2.7073e-05	2.89181	2.26933e-05	chr2.56830635.56831205	2.61369	0.00011173	2.35775	1.96724e-05	chr11.120140203.120140636	3.58569	3.10634e-05	2.6636	4.74814e-05
chr13.5518808.5519886	2.27788	0.00394752	2.39376	0.00475653	chr2.58176735.58177508	1.91854	0.00260832	1.38923	0.00448474	chr11.120834434.120834759	3.17833	0.000785813	2.15439	0.00274255
chr13.5573122.5573859	2.24997	0.00395602	3.50478	0.000116619	chr2.58272715.58273348	2.76577	0.000517034	1.80135	0.00701873	chr11.121879372.121879753	3.62474	0.000258104	2.7636	0.000202485
chr13.5727983.5728536	2.34162	0.00744292	3.21156	0.00067114	chr2.59462980.59464123	2.05654	0.000664321	1.79781	2.71551e-06	chr12.5149025.5149438	2.55434	0.000745192	1.83838	0.00346072
chr13.6178213.6179524	1.59034	0.00498939	2.19542	6.72686e-05	chr2.59693185.59693973	2.25662	0.000694122	2.27139	1.62533e-05	chr12.5672432.5673068	2.38965	0.00118623	1.68839	0.00635651
chr13.6260123.6261075	2.50592	5.61439e-05	3.19286	2.07305e-06	chr2.59783490.59784766	2.82194	1.17893e-07	2.87673	3.3148e-16	chr12.5683847.5684926	2.86268	1.97856e-06	1.36115	0.00138094
chr13.6338197.6338590	2.62597	0.000842033	4.16156	1.18036e-05	chr2.59842845.59844179	2.28087	0.000100088	2.91332	7.18172e-11	chr12.5701855.5703078	2.87504	1.4174e-06	1.59831	0.000158478
chr13.6484080.6484881	2.36485	0.00361925	3.14735	0.000435131	chr2.60536413.60537159	1.59308	0.0095579	1.78855	6.62816e-05	chr12.5770308.5771232	1.979	0.00549093	1.62355	0.00526795
chr13.6492598.6493842	1.88904	0.00468588	2.74566	9.13838e-05	chr2.61191081.61191767	2.19364	0.00220934	2.3205	0.000120311	chr12.5820782.5821828	2.67454	9.42745e-05	2.23139	5.86366e-05
chr13.7090718.7091489	2.44249	0.00343164	2.6893	0.000924816	chr2.61365507.61366133	2.45943	0.00273621	2.22187	0.00211202	chr12.5968940.5969883	2.47447	0.000336841	2.00694	0.000293623
chr13.8056061.8056943	1.5729	0.00909003	3.44739	3.46254e-07	chr2.61516163.61517005	3.0994	2.10636e-06	1.94774	3.38679e-05	chr12.6039501.6040376	2.57933	1.37163e-05	1.68353	0.000147604
chr13.8118089.8118738	2.13231	0.00808226	3.10052	0.000461809	chr2.63324741.63325295	2.32536	0.000377913	2.42179	5.72913e-06	chr12.6257823.6258660	2.66287	0.000196634	1.52839	0.0048186
chr13.9333121.9333681	1.78477	0.00975029	2.0361	0.0034094	chr2.65484367.65485402	1.89526	0.00275042	1.63277	0.000895808	chr12.6536897.6537742	3.86173	3.92421e-06	1.91866	0.00278985
chr13.9430385.9431135	2.29603	0.00135816	2.61038	0.000423424	chr2.65609961.65610820	2.60196	8.65932e-05	2.05484	6.05355e-05	chr12.6720467.6720937	2.63706	0.00229136	2.32697	0.00130501
chr13.9473355.9473862	2.05227	0.0044398	2.18257	0.00243344	chr2.65698106.65698899	2.48088	0.00160245	1.62296	0.00659992	chr12.6758054.6758661	3.04047	0.000448438	2.38097	0.000739063
chr13.10170398.10170881	2.27564	0.00704659	3.28504	0.000450753	chr2.67533551.67534311	2.60683	4.21058e-05	2.48964	8.48532e-07	chr12.7282260.7282942	2.95237	3.18384e-05	2.3978	2.12684e-05
chr13.11294548.11295213	2.56989	0.000194592	1.81122	0.0053785	chr2.68198987.68199547	2.22346	0.00187874	3.22427	3.62197e-07	chr12.7289077.7289888	3.01434	4.48436e-06	1.59911	0.000833914
chr13.11757613.11758495	2.31457	0.000123809	2.04336	0.000500661	chr2.68976891.68977365	2.74888	0.000207519	1.90304	0.00121898	chr12.7387405.7387950	3.88612	1.94686e-09	2.75725	1.37335e-09
chr13.12013803.12014647	2.0012	0.000894578	2.1434	0.000249574	chr2.69418221.69418890	2.73297	0.000241057	1.5276	0.00501176	chr12.7388031.7388903	3.52632	1.31347e-12	2.82472	8.491e-16
chr13.12053952.12054270	2.2311	0.00941762	2.41743	0.00779049	chr2.73815426.73816250	2.81623	1.5151e-05	1.57462	0.000893697	chr12.7450146.7451207	2.57809	3.19117e-07	1.8429	4.39611e-08
chr13.13546609.13547364	1.94766	0.00318836	2.52349	0.000293262	chr2.73932427.73933283	2.50849	0.000330621	2.178	4.20759e-05	chr12.7456760.7458195	1.90614	0.00033362	1.12343	0.00390815
chr13.13703170.13704219	2.61047	6.49052e-05	3.1539	5.16967e-06	chr2.74020039.74020913	2.56874	0.000152046	1.88786	0.000387867	chr12.7749050.7750194	2.05524	0.000330874	1.72595	8.53069e-05
chr13.14453572.14454041	2.36914	0.00831782	2.88802	0.00315776	chr2.74415787.74416670	2.05562	0.000145241	3.46768	2.8801e-15	chr12.7771518.7772237	2.2058	0.00105008	2.63725	5.73901e-06
chr13.14498548.14499548	1.97319	0.00135229	2.73452	1.55262e-05	chr2.74789167.74790211	2.75862	2.97315e-05	1.92528	0.000114474	chr12.8232292.8233364	1.44444	0.0071809	1.15363	0.00173242
chr13.14506662.14507308	2.33715	0.00361801	2.42309	0.00277529	chr2.75241498.75241904	2.45925	0.00116329	2.13583	0.00126116	chr12.8451578.8452448	1.81999	0.00102964	1.08754	0.00407265
chr13.15282521.15283563	2.55148	0.000530878	3.34068	2.02804e-05	chr2.75257054.75257659	2.32443	0.00270623	1.73674	0.00742389	chr12.8899247.8900025	2.06008	0.00186124	1.65325	0.00151267
chr13.15444123.15444897	1.72129	0.00436964	2.51137	4.99993e-05	chr2.78159636.78160628	2.08399	4.35301e-05	2.05781	2.32113e-09	chr12.9300826.9301146	2.86984	0.00264902	2.58682	0.000681748
chr13.16355069.16355976	1.9134	0.00173312	2.23183	0.000235332	chr2.78565846.78566892	2.56302	3.16037e-05	1.53535	0.000770054	chr12.11376039.11376942	2.01471	0.000434399	2.11284	2.348e-06
chr13.16543536.16544333	1.78201	0.00547553	2.4474	0.00034177	chr2.80729274.80729925	2.72492	2.44405e-05	2.47814	2.07765e-06	chr12.11671418.11672144	2.715	4.59965e-05	2.58417	1.72346e-06
chr13.17494905.17495680	3.11629	7.92476e-06	3.002	2.05474e-05	chr2.81100982.81102073	2.33394	5.64222e-05	1.40394	0.000472576	chr12.11694449.11695309	1.91487	0.000787684	2.03408	7.31871e-07
chr13.18105418.18106061	2.33517	0.00272185	2.90792	0.000443437	chr2.84119541.84120402	2.57942	0.000825648	1.65774	0.00638942	chr12.11745006.11745926	2.17154	0.00490751	2.04143	0.00174265
chr13.19415109.19415755	2.49272	0.00121451	3.06379	0.000257957	chr2.90669915.90670476	2.839	0.000873118	2.1606	0.00321026	chr12.11854661.11855131	2.46087	0.00476279	2.23564	0.000888749
chr13.20217345.20218442	1.61588	0.00848589	1.55749	0.00816354	chr2.90880124.90880966	2.25454	0.00040906	1.72031	0.000379625	chr12.12074712.12075502	2.9157	8.4757e-05	2.25461	0.000198007
chr13.20362316.20362909	2.263	0.00314305	2.92773	0.00027297	chr2.91859140.91860176	2.40555	0.000133609	1.75049	0.000109052	chr12.12624822.12625350	3.2375	4.82632e-06	2.23656	4.3128e-05
chr13.20452409.20453255	2.19706	0.00122798	2.15362	0.00110513	chr2.93091503.93092226	2.91346	2.58474e-05	2.14287	3.26042e-05	chr12.12722768.12724286	1.34476	0.00866611	1.48982	4.78041e-05
chr13.20600818.20601861	1.68773	0.00150125	1.401	0.00523215	chr2.93131879.93132658	2.16998	0.000616927	2.18177	1.31869e-05	chr12.12776392.12777448	2.5574	3.65688e-07	1.76226	2.83116e-08
chr13.21372630.21373354	2.79166	8.5942e-07	3.62144	1.02918e-09	chr2.94514471.94515118	2.10193	0.00440394	2.17916	0.000783377	chr12.12786231.12786953	2.81066	3.17391e-05	3.38957	1.44546e-08
chr13.21417230.21418047	2.71064	6.36021e-05	3.18714	4.47468e-06	chr2.94764485.94765551	2.18043	0.000229474	1.07288	0.00999667	chr12.12803527.12804346	3.88549	4.49497e-10	2.05233	3.01512e-06
chr13.21914480.21915084	2.67979	0.000251374	2.38949	0.000812351	chr2.94945449.94946299	2.8405	3.85714e-06	2.54465	7.6331e-08	chr12.12885913.12887007	3.06244	2.40341e-08	2.01541	1.65276e-07
chr13.21923160.21923879	2.3885	0.0016106	2.28072	0.00450044	chr2.95303935.95304803	2.80022	4.4913e-05	2.08271	0.000170519	chr12.13011192.13011835	3.14471	1.41645e-05	2.00492	0.00020296
chr13.22380830.22381882	1.96774	0.000516974	1.79663	0.000920091	chr2.95366544.95367523	2.34011	6.1524e-05	2.05584	2.60417e-07	chr12.13023659.13024887	1.89665	0.000256161	1.1395	3.32616e-05
chr13.22402776.22403582	2.8241	0.000354975	3.57296	1.23589e-05	chr2.96273740.96274306	2.36482	0.00986224	2.46013	0.00221974	chr12.13476341.13477247	3.28624	1.27773e-07	2.17263	4.0597e-06
chr13.22650370.22651121	2.56062	0.00102285	2.47757	0.000733447	chr2.96510428.96511188	2.41913	0.00045646	1.64705	0.00241869	chr12.13613449.13614420	1.77549	0.00089848	1.06563	0.00647378
chr13.23383517.23384278	2.71282	0.000555659	2.88497	0.000426173	chr2.97385994.97386743	3.18523	4.42521e-06	2.59947	1.97867e-06	chr12.13940540.13941630	2.21806	0.00123783	1.49719	0.00887134
chr13.23964377.23965674	2.11261	0.000642729	2.64261	2.69081e-05	chr2.99470806.99471515	2.71798	5.6839e-05	2.69879	1.24691e-06	chr12.14174228.14174985	2.02311	0.00758366	1.61827	0.00867548
chr13.24016082.24016790	2.55896	0.000814837	2.83253	0.00043951	chr2.101860824.101861864	2.77329	2.44299e-05	2.30154	6.44795e-06	chr12.14260132.14261000	2.30542	0.000198591	1.27577	0.00637152
chr13.24048534.24048893	2.317	0.00397405	2.34168	0.00269906	chr2.103167910.103168661	2.81083	8.81016e-05	1.57915	0.00442255	chr12.14528511.14530115	3.23104	1.60861e-07	2.42751	1.19119e-07
chr13.24263407.24264376	2.33264	0.000266463	2.07111	0.0010665	chr2.103251144.103251892	2.36011	0.00114296	2.43274	0.000105696	chr12.14676147.14677331	3.19987	1.94596e-06	1.50465	0.000938881
chr13.24787360.24787893	2.36246	0.00176079	2.9843	0.000362053	chr2.103707246.103707756	2.01511	0.00444996	1.98596	0.000848372	chr12.14785923.14786551	2.4073	0.00132494	2.65315	4.64598e-05
chr13.24977643.24978828	1.63639	0.00635945	1.65019	0.00450887	chr2.104717376.104717682	2.48846	0.00423727	2.83567	0.000281584	chr12.14853157.14853803	2.23714	0.0037295	2.23332	0.000674479
chr13.25127199.25127687	2.26287	0.000624091	2.99215	2.43264e-05	chr2.106460554.106461726	2.55682	1.46865e-05	1.73246	3.1386e-05	chr12.15385941.15386319	3.01978	0.000123265	1.91886	0.00185049
chr13.25127811.25128578	2.22352	0.000147662	4.16634	1.26984e-11	chr2.106473425.106474314	1.98887	0.0031345	2.08492	0.000108289	chr12.15410317.15411240	2.74123	5.86662e-05	2.23139	5.86366e-05
chr13.25195434.25196941	2.23487	3.04255e-05	1.52676	0.00305767	chr2.106747354.106747887	1.99624	0.000978546	1.47957	0.000771612	chr12.15769374.15769918	2.70805	0.000434885	2.32751	0.000653176
chr13.25206799.25207492	3.09296	1.3509e-05	2.79151	6.56521e-05	chr2.107278440.107279681	1.83676	0.00611632	1.4604	0.00636184	chr12.15805869.15806157	2.46696	0.00133508	2.09959	0.00094311
chr13.25212785.25213591	1.61267	0.0074885	2.89133	4.70291e-06	chr2.107341246.107341732	2.86914	3.43886e-05	1.54942	0.00272568	chr12.15920779.15921865	3.72783	1.32602e-10	1.28581	0.000252674
chr13.25383715.25384441	2.70662	0.00074393	2.91722	0.000492133	chr2.107371780.107372269	2.65393	0.00049883	1.74344	0.00476898	chr12.15929060.15930053	2.3361	0.000893747	2.02764	0.000564345
chr13.25998663.25999274	2.71865	0.000585547	2.53909	0.00316298	chr2.107391298.107392312	1.97345	0.00149588	1.66016	0.000506446	chr12.16093702.16094451	3.51048	4.5879e-07	2.6289	2.47008e-06
chr13.26227370.26227990	2.6791	0.0003608	2.9401	0.000253459	chr2.107411202.107411861	2.80943	0.0002548	1.74657	0.00260562	chr12.16099561.16100354	2.60409	0.000663869	1.85346	0.00329386
chr13.26951129.26952064	1.95418	0.00740379	2.20327	0.00168035	chr2.107552290.107553086	2.06677	0.00063448	1.75913	0.000154175	chr12.16887505.16887891	3.39896	0.000340447	2.12393	0.00305581
chr13.27432987.27433494	2.11267	0.007689	3.44777	0.00014164	chr2.107658018.107658923	2.72246	7.57373e-05	2.15829	6.86817e-05	chr12.21380673.21381116	3.57135	4.44319e-05	2.52431	0.00021905
chr13.28692288.28693098	1.76321	0.0029392	2.31731	0.000102691	chr2.107855016.107856081	1.80316	0.00389448	1.79647	0.000149718	chr12.21476429.21476984	2.59047	0.00196349	2.26997	0.00144595
chr13.29023216.29024037	2.31466	0.000423146	2.10105	0.000768214	chr2.108731827.108732350	2.53009	0.00207454	2.21373	0.00122855	chr12.25160838.25161753	2.52919	1.46459e-05	1.28486	0.0020533
chr13.29234121.29235426	2.19391	0.000675634	2.18846	0.000959402	chr2.110313193.110314004	2.29819	0.000209561	1.97496	1.10395e-05	chr12.25312171.25312884	3.32635	4.15162e-06	2.88052	6.28533e-08
chr13.29389732.29390794	2.33762	0.000657307	2.79064	4.58961e-05	chr2.110390474.110391405	2.5259	6.46187e-05	1.73601	0.000315053	chr12.26514627.26515346	3.49795	3.52308e-06	1.69678	0.00185663
chr13.29460395.29461850	1.52256	0.00514315	2.58717	1.50532e-06	chr2.110540775.110541476	2.0287	0.00826383	2.3527	0.000446079	chr12.26551220.26552318	2.97805	5.10855e-07	2.43032	5.40849e-08
chr13.30200492.30201349	2.73257	3.67431e-05	2.49235	0.000131424	chr2.110787359.110788362	1.66736	0.00265595	1.50123	0.000100724	chr12.26733812.26734083	2.37024	0.00790431	1.97678	0.00769494
chr13.30283696.30284419	2.21483	0.00583334	2.99516	0.000682572	chr2.112242654.112243017	1.96109	0.00605974	2.17347	0.000349514	chr12.27182132.27183693	1.85105	0.00154964	1.04839	0.00342258
chr13.30341821.30342958	1.77259	0.00592139	2.14748	0.000876992	chr2.112720220.112721230	2.09273	0.000762879	1.25644	0.00657126	chr12.27293608.27294935	2.49196	1.03356e-05	1.38282	0.000611936
chr13.30384173.30385312	1.95358	0.00477836	1.95078	0.00605259	chr2.112760574.112761959	1.881	0.00230317	1.2943	0.00514422	chr12.27370698.27371473	3.5509	4.98279e-06	3.24158	2.27711e-08
chr13.30607721.30608373	2.34804	0.00105653	2.76932	0.000215065	chr2.112944085.112945063	1.57352	0.00711859	2.79395	3.42811e-11	chr12.27988618.27989085	3.63251	6.65791e-09	1.07046	0.00605481
chr13.30835435.30836570	1.63908	0.00667814	2.09554	0.000439481	chr2.113622891.113623504	1.9231	0.00510811	1.97182	0.000344673	chr12.28048044.28049678	2.60818	1.05857e-05	1.69969	0.000136805
chr13.30997289.30998215	2.09702	0.000418382	2.83932	3.65228e-06	chr2.113980465.113981431	2.59058	1.83873e-06	2.68702	1.04891e-16	chr12.28128716.28128998	2.25532	0.00951503	2.35032	0.00144115
chr13.31249277.31250219	2.26421	0.000725182	2.56084	0.000241407	chr2.115988264.115989067	2.55004	0.000558375	1.79214	0.000811196	chr12.28401185.28402347	2.11337	0.000139737	2.04526	8.54174e-07
chr13.31878219.31879353	2.00379	0.000540283	1.99849	0.000471027	chr2.118028772.118029657	1.84817	0.00169389	2.39392	2.98318e-08	chr12.28665181.28665676	2.50352	0.00013763	2.30617	9.51479e-06
chr13.31888546.31889120	2.71569	0.00142034	2.61977	0.00137226	chr2.119981460.119982251	2.26382	0.000551256	2.62229	8.36255e-08	chr12.28666892.28667712	3.11019	6.58109e-08	1.31976	0.000645839
chr13.31926293.31927291	1.96999	0.00315571	2.00437	0.00236815	chr2.123004334.123005216	2.27992	0.00079105	1.48587	0.00545142	chr12.28962852.28965016	1.61917	0.00122933	1.07225	0.0016368
chr13.33067697.33068563	2.22522	0.0013796	2.36412	0.000488995	chr2.123550910.123551881	2.01773	0.00647361	2.03394	0.00118281	chr12.29060457.29060941	3.41741	0.000119222	2.85569	7.56919e-05
chr13.34312805.34313742	1.52596	0.00627324	1.50364	0.00371368	chr2.124130784.124131402	2.63094	7.7683e-06	2.47535	6.23208e-08	chr12.29175670.29176729	1.77214	0.00538242	1.80048	0.000695219
chr13.34521473.34522349	3.29776	8.54417e-07	3.10491	3.07516e-06	chr2.124656843.124657805	2.26136	4.42724e-05	2.08623	6.28361e-09	chr12.30102948.30103604	2.09418	0.000695091	1.27253	0.00715757
chr13.34859068.34859857	3.15476	8.79434e-07	3.81175	1.68123e-08	chr2.124720386.124721564	1.89216	0.000552169	1.43879	0.000116218	chr12.30466598.30467725	1.79299	0.000935155	1.85861	8.78158e-08
chr13.35214129.35214693	2.33488	0.00163773	3.41188	4.08501e-05	chr2.124769305.124770315	1.79762	0.00187533	2.07707	2.82808e-08	chr12.32553479.32554264	2.1648	0.000863331	1.52703	0.00221862
chr13.35241229.35242110	2.25003	0.000167575	3.13442	3.16316e-07	chr2.125001791.125002512	2.83079	1.26897e-05	2.58253	3.80484e-07	chr12.33182490.33183421	2.15358	0.000279029	1.43966	0.000773881
chr13.35283735.35284719	2.35026	7.99686e-05	2.7852	3.92379e-06	chr2.125323203.125323829	1.83734	0.00565777	1.95094	0.000435741	chr12.33263927.33264283	2.27401	0.00182622	2.23578	0.000286162
chr13.36084487.36085267	2.00277	0.000236968	2.49131	3.55103e-06	chr2.126074964.126075944	2.00949	0.0047936	2.0615	0.0006441	chr12.34188573.34189131	1.73875	0.00937348	1.63045	0.00292608
chr13.36264966.36265965	2.39929	1.96632e-05	2.33203	1.84196e-05	chr2.127409829.127410617	2.74004	6.5922e-06	2.09642	8.14975e-07	chr12.34380630.34381737	1.9531	0.00243288	1.6239	0.00114507
chr13.36308837.36309547	2.10254	0.00319262	2.83344	3.09655e-05	chr2.128156016.128156641	1.98315	0.00390419	1.92364	0.000642764	chr12.34697305.34698344	2.23129	4.40496e-05	1.62011	6.02081e-05
chr13.36503502.36504456	2.18845	0.000990605	1.88989	0.00218882	chr2.128659097.128659755	2.09196	0.000920738	2.34673	9.75367e-07	chr12.34767055.34768168	2.60054	7.6274e-05	1.46301	0.00196848
chr13.36735873.36736852	2.55525	5.09761e-05	2.27001	8.3558e-05	chr2.129686672.129687682	2.17611	0.000327144	2.45807	2.88535e-07	chr12.34933027.34933827	2.50754	0.000632314	2.03408	0.00132412
chr13.36892156.36892934	2.57984	8.74293e-05	2.50157	9.83337e-05	chr2.129717993.129718830	2.5117	0.000701431	2.05518	0.000828321	chr12.34989137.34989834	3.0908	4.47485e-05	2.44314	5.47069e-05
chr13.37010692.37011297	2.01066	0.00343113	2.04545	0.00401199	chr2.129998243.129998991	1.87619	0.0017918	2.53911	1.86685e-07	chr12.35566452.35567260	1.97058	0.00355155	2.60061	7.5297e-06
chr13.37134405.37135621	1.82234	0.00109112	3.45135	4.08035e-08	chr2.132095742.132096382	2.61647	0.000137279	1.59362	0.00251216	chr12.35746473.35747341	2.20771	0.000365017	1.35504	0.000323446
chr13.37196777.37197628	3.25287	1.25453e-06	2.84856	1.59111e-05	chr2.133669587.133670415	2.38381	1.72777e-05	3.16605	6.79267e-15	chr12.36049418.36050053	2.03157	0.00381789	2.37961	0.000131957
chr13.37342678.37343565	2.6612	5.7634e-05	2.63632	4.40278e-05	chr2.133738798.133739614	1.86965	0.00504838	2.58896	3.04343e-06	chr12.36466759.36467155	3.48721	1.0896e-05	1.6448	0.00372617
chr13.37355667.37356434	1.91725	0.00192736	1.85867	0.00209038	chr2.134106106.134107049	1.74752	0.00540653	1.97749	2.4527e-06	chr12.36840161.36840684	2.32121	0.00109283	2.00862	0.00146403
chr13.37415592.37416493	2.21523	0.00223262	2.00873	0.00473543	chr2.134920627.134921373	1.76763	0.00653938	1.32828	0.00863945	chr12.37783339.37784054	1.9214	0.00349256	1.76007	0.000918641
chr13.38650350.38650846	2.23171	0.00255416	2.0623	0.00340668	chr2.137721911.137722428	2.65202	0.000152623	2.34452	4.99488e-05	chr12.37871479.37872097	3.14903	3.77918e-05	2.66726	1.31085e-05
chr13.39821774.39822382	2.32832	0.000871158	2.26131	0.00115022	chr2.137981357.137982132	1.84211	0.00242344	1.69441	5.83205e-05	chr12.37959321.37960255	3.11508	1.01329e-06	1.58133	0.00043297
chr13.40791873.40792653	2.30328	0.00181804	2.64027	0.000345241	chr2.138473286.138473835	2.12495	0.00565288	2.24696	6.59775e-05	chr12.38146827.38147875	2.86049	1.63221e-06	2.51587	1.289e-07
chr13.41822444.41823047	2.61221	0.000438404	2.68452	0.00029324	chr2.138541651.138542293	2.34444	0.00181815	2.11197	0.000812379	chr12.38395081.38395607	2.38711	0.00129393	1.64582	0.00589891
chr13.41823093.41823650	2.10554	0.00254483	2.25372	0.00211948	chr2.139117025.139118070	1.90186	0.00263064	1.34449	0.00592269	chr12.38975582.38976505	2.47236	5.85747e-05	1.25468	0.00583998
chr13.41902928.41903856	1.70311	0.00824248	1.78079	0.00448115	chr2.139797155.139798367	1.66183	0.00946165	1.85195	2.90523e-05	chr12.38987822.38988222	3.21187	0.000566972	2.1186	0.00345104
chr13.42617168.42617645	2.69919	4.17706e-05	2.91084	1.30059e-05	chr2.139807780.139808628	2.33692	0.000146271	2.25276	2.66443e-06	chr12.39214768.39215813	2.53464	0.000411434	1.77857	0.000809695
chr13.42894454.42895195	1.6266	0.00966516	2.39698	0.000256398	chr2.140424613.140425310	2.34464	0.00243276	1.74853	0.00693389	chr12.39260837.39261429	2.51167	0.00176257	1.80885	0.00622909
chr13.44770994.44771424	2.85353	0.000416597	2.80542	0.000963112	chr2.141063831.141064604	2.36014	0.00111533	1.77789	0.0029786	chr12.39330345.39331364	2.14809	0.000983287	1.4305	0.00434307
chr13.45026205.45026537	3.81758	4.66427e-05	2.8581	0.00155642	chr2.146167855.146168941	1.54367	0.00629814	1.86939	8.13974e-09	chr12.39459963.39460448	2.64289	0.000667902	2.4578	0.000149409
chr13.45049146.45050171	1.66595	0.00927897	1.81402	0.00385279	chr2.146172220.146172474	2.1124	0.00456973	2.08713	0.000904716	chr12.40399369.40400428	1.55897	0.00657208	1.49142	0.000587887
chr13.45400605.45401401	2.97833	0.000271691	2.56892	0.000384736	chr2.146430437.146431282	1.91727	0.00131147	2.12058	1.94766e-06	chr12.40437185.40438069	3.19955	3.50828e-06	1.38841	0.00491992
chr13.46071569.46072144	2.67918	0.00118324	2.94452	0.000366098	chr2.146872666.146874090	2.25865	0.000222997	1.48633	0.000924007	chr12.40568441.40569600	1.83862	0.000765795	1.12586	0.00475263
chr13.46092766.46093194	2.48538	0.00498377	2.50371	0.00499296	chr2.147699371.147700025	1.97477	0.00639555	1.99457	0.00107758	chr12.40670690.40671482	3.15357	6.93146e-07	2.84646	7.06392e-09
chr13.46302004.46302400	2.34148	0.00887891	3.16415	0.000902726	chr2.147710432.147711449	2.23693	0.000310182	2.27382	6.80546e-09	chr12.40698007.40698747	1.86843	0.00196421	2.4981	6.27006e-07
chr13.46334942.46335528	2.64706	0.000845611	2.80501	0.000761292	chr2.148561496.148562617	1.84576	0.00823809	1.66041	0.00421258	chr12.40969211.40969897	2.74409	1.93914e-05	2.4631	1.23429e-06
chr13.47134793.47135363	2.75914	2.72496e-05	3.3834	8.92664e-07	chr2.151838976.151839760	2.31453	0.000650135	1.91288	0.000181451	chr12.40980149.40980720	3.17145	3.80682e-05	2.47766	9.53739e-05
chr13.48075405.48075872	2.8223	0.000378453	2.44074	0.00156853	chr2.151938683.151940209	1.6113	0.00927079	1.94006	5.25741e-05	chr12.41430562.41431543	4.49324	1.116e-13	2.98489	1.46572e-13
chr13.48645005.48645438	2.56993	0.0048229	2.89785	0.00129448	chr2.152321639.152322368	2.04357	0.000277939	2.23605	8.67772e-08	chr12.41847138.41848197	2.51884	2.71261e-06	1.08844	0.00291253
chr13.49586063.49586493	2.29509	0.00606397	2.27014	0.00809483	chr2.152326062.152326539	2.09048	0.00608365	1.76512	0.0050513	chr12.41859416.41860092	2.39028	0.00341532	2.11718	0.00201025
chr13.49744566.49744977	2.42731	0.00508627	2.82195	0.00126927	chr2.152985391.152986113	2.08515	0.00123969	2.24663	1.16494e-05	chr12.41943732.41944891	2.74282	4.69376e-07	2.09416	5.08037e-08
chr13.52436372.52437211	2.12469	0.00149436	2.23407	0.000731713	chr2.156355846.156356608	2.30979	0.00134243	1.83808	0.00264911	chr12.42157661.42158893	2.1033	0.00192996	1.57879	0.00345894
chr13.54794025.54794341	2.52743	0.00114543	2.45661	0.00470166	chr2.156408109.156408731	1.79182	0.00556621	1.56724	0.00201286	chr12.42638705.42639232	2.46472	0.00165448	2.88742	2.60712e-05
chr13.55002118.55002439	2.62547	0.0023231	2.62387	0.00393446	chr2.158909028.158909556	2.32279	0.00122275	2.13894	0.000336285	chr12.42893130.42893754	2.50638	9.78873e-05	1.70467	0.000564231
chr13.55006047.55006573	2.85612	0.000249216	2.02343	0.00603529	chr2.159388008.159388966	2.2788	0.000694867	1.459	0.00445615	chr12.43254760.43255777	2.76651	3.0427e-06	2.3331	2.56114e-07
chr13.55789642.55790066	2.94292	0.000698022	3.38914	0.000240104	chr2.160528531.160529192	2.28214	0.000610017	2.42429	8.76152e-06	chr12.43452108.43452643	3.23084	0.000211592	2.06277	0.00251799
chr13.57711438.57712136	2.31151	0.00162796	1.89467	0.00971483	chr2.160548636.160549290	2.06018	0.00511249	1.56964	0.00961758	chr12.44345174.44346913	1.73963	0.000825108	1.27621	0.000318774
chr13.58202780.58203523	1.98843	0.00301656	2.30593	0.000463037	chr2.161150086.161150776	2.70564	1.91538e-05	1.45622	0.00146675	chr12.44626776.44627953	4.01451	1.08092e-13	2.90608	5.18815e-17
chr13.59109610.59110535	1.69949	0.00392842	2.62348	1.22535e-05	chr2.161259701.161260437	2.14505	0.00236584	2.3937	3.79076e-05	chr12.44658985.44659814	3.15562	4.4167e-06	1.545	0.00242084
chr13.59480841.59481522	2.02188	0.00604475	2.1148	0.0043569	chr2.168604764.168605327	2.31158	0.000742799	2.61309	1.23706e-05	chr12.44903090.44903840	1.68219	0.0037796	1.83419	5.07283e-05
chr13.59887274.59887835	2.73252	0.000151609	3.50799	1.03752e-05	chr2.168609700.168610171	1.84373	0.00964419	2.50586	7.3956e-05	chr12.44938841.44939825	2.85324	3.2076e-07	2.50746	1.06955e-08
chr13.60047697.60048539	2.24933	0.00199485	2.12454	0.00303596	chr2.171487123.171487959	1.95625	0.00146154	1.71056	0.000268739	chr12.44950634.44950939	2.39058	0.00418733	2.19404	0.00189962
chr13.60340028.60340472	2.46864	0.00204519	2.69507	0.0012598	chr2.171604845.171605619	1.98701	0.00107426	1.88184	5.91767e-05	chr12.45028992.45029333	2.50546	0.000723655	1.92536	0.00112219
chr13.62940490.62941286	2.71149	0.000656076	3.40703	5.78308e-05	chr2.173457247.173457717	2.21429	0.00379971	1.77836	0.00558587	chr12.45061352.45061776	2.06279	0.00368275	1.71622	0.00366745
chr13.63672301.63672701	2.53443	0.00429522	3.23391	0.00107374	chr2.173464734.173465518	1.98313	0.000574425	2.77127	2.19723e-11	chr12.45163214.45163647	3.40185	5.07635e-06	2.73651	1.54742e-06
chr13.64020626.64021315	2.55356	0.000450658	2.50532	0.00068702	chr2.178723249.178724035	3.24353	3.70084e-06	2.42257	1.19208e-05	chr12.45265316.45265956	2.38199	0.000617776	2.06666	0.00054683
chr13.64022473.64023108	2.71535	0.000574339	2.97298	0.000262246	chr2.180306791.180307276	2.10719	0.00613115	2.19835	0.000990369	chr12.45304536.45305334	2.18294	0.00307927	2.22306	0.000359117
chr13.64211959.64212893	2.19612	0.00330857	2.79817	0.0004322	chr3.4350649.4351252	2.73344	0.00187939	2.04221	0.00523745	chr12.45465879.45466963	1.26508	0.00727524	1.56506	3.82426e-08
chr13.66947233.66947800	1.80771	0.00452754	2.72442	3.79459e-05	chr3.5754551.5755603	2.46954	7.1444e-05	1.64918	0.000266476	chr12.45551862.45552576	3.28374	3.77473e-06	2.22656	2.92818e-05
chr13.68707194.68707966	1.64249	0.00325593	2.06691	0.000138811	chr3.7865289.7866011	4.03327	3.1374e-07	2.94123	8.54923e-07	chr12.45561853.45562823	2.63154	3.8273e-06	2.58919	2.70681e-09
chr13.68815398.68816501	2.00511	0.00165946	1.55661	0.00846016	chr3.8670521.8670838	2.7621	0.000132702	2.31285	9.0956e-05	chr12.45563212.45563950	1.8178	0.00457845	1.63861	0.00153308
chr13.69303275.69303692	3.29867	0.000235287	2.37742	0.00635075	chr3.8698344.8699019	2.2365	0.00447392	2.10622	0.00171752	chr12.45594249.45595074	3.80826	2.02497e-11	2.25612	4.68948e-10
chr13.69330035.69331388	1.8478	0.00135636	2.69239	6.68156e-06	chr3.9351625.9352240	2.46801	0.000155588	2.94752	1.17735e-07	chr12.45597918.45598659	4.16355	1.04764e-14	1.5636	1.95865e-07
chr13.69541739.69542262	2.24413	0.0010972	2.98302	3.20768e-05	chr3.9352907.9353428	2.06103	0.00892944	2.09606	0.00289737	chr12.45604541.45605653	1.98288	0.000476117	1.8854	9.59923e-06
chr13.69561942.69562471	2.68432	0.000398302	2.7779	0.00041465	chr3.9679208.9680072	2.8063	4.69579e-05	2.2569	3.60656e-05	chr12.45669952.45672917	1.56453	0.00124144	1.25981	2.35203e-07
chr13.69708083.69708674	2.03535	0.00676537	2.05333	0.00642908	chr3.9886071.9886501	3.1458	0.00012266	2.36615	0.000404538	chr12.45738116.45738770	3.27245	1.57811e-05	2.13744	0.00038325
chr13.69751392.69752178	2.42953	7.01535e-05	2.8589	4.6726e-06	chr3.10125190.10125814	2.47594	0.000138276	2.00215	5.52748e-05	chr12.45749301.45750040	2.70853	0.000572219	1.90503	0.0035698
chr13.69778028.69778928	2.66236	8.88588e-06	4.17451	1.75623e-09	chr3.11261117.11261573	2.37172	0.0068862	1.96192	0.00948061	chr12.45850194.45851092	3.58455	3.9601e-08	3.39558	1.39013e-11
chr13.69864925.69865489	2.64589	0.000987573	2.26714	0.00418974	chr3.15156614.15157244	1.79017	0.00165379	1.88788	3.12937e-06	chr12.45901653.45902702	3.26348	4.02268e-10	2.52899	8.56395e-12
chr13.70003418.70004188	2.11311	0.00469141	2.72416	0.000543827	chr3.17999804.18001237	1.86166	0.00389685	1.41116	0.00423791	chr12.45917311.45918512	2.2882	0.000197738	2.136	4.30698e-05
chr13.70309065.70309944	3.1129	9.27481e-05	2.86946	0.000463544	chr3.18878868.18880242	2.21878	4.79778e-05	2.04812	4.88151e-08	chr12.45929097.45930270	1.27308	0.0075352	1.597	1.14486e-07
chr13.71231109.71231659	1.98777	0.00434342	3.05011	5.86802e-05	chr3.19614163.19615036	2.05079	0.00327934	2.29422	9.29519e-05	chr12.45977812.45979503	1.75411	0.00228866	1.86868	2.98642e-05
chr13.71461317.71462143	2.43772	0.000710265	2.42945	0.00077569	chr3.19798416.19799149	1.78955	0.00527007	1.90406	0.000220665	chr12.45998609.45999042	2.32837	0.00519986	2.07964	0.00340669
chr13.71799282.71800324	2.14734	0.000393983	1.5715	0.00364641	chr3.21409640.21410607	3.03999	1.66294e-06	2.28162	4.301e-07	chr12.46125736.46126746	1.92346	0.000120577	1.03494	0.00146821
chr13.72055952.72056958	2.94587	1.41249e-06	2.53031	3.65177e-05	chr3.21885545.21886361	2.08754	0.00807633	1.78346	0.00758872	chr12.46132176.46133345	1.81685	0.00167709	1.97869	1.62852e-05
chr13.72212469.72213253	1.89948	0.00161971	2.46314	5.8584e-05	chr3.24867998.24868594	3.12013	6.87874e-05	2.03719	0.000873223	chr12.46214860.46215373	2.90999	9.45686e-05	2.31495	0.000125831
chr13.73373142.73374403	2.55665	5.0852e-05	1.66227	0.00787899	chr3.26796804.26797591	1.66194	0.00666478	1.63102	0.000533205	chr12.46220936.46222229	3.63942	4.01166e-10	2.4312	4.28233e-10
chr13.73400859.73401384	2.32608	0.00402616	3.86176	2.66842e-05	chr3.27656725.27657697	1.53215	0.00417039	1.63064	6.1559e-07	chr12.46364791.46365731	1.83637	0.00425735	2.17913	5.31046e-05
chr13.73476351.73477229	1.78371	0.0037532	1.86273	0.00155061	chr3.28219338.28220403	2.07136	0.00241699	1.87732	0.000909238	chr12.46371496.46372506	3.06159	8.68701e-06	1.69166	0.000783621
chr13.73721257.73721757	2.1909	0.00693506	2.12917	0.00865809	chr3.28755384.28756365	2.27624	0.000954245	1.88323	0.000458654	chr12.46390636.46391475	1.68649	0.00290017	2.59155	3.43998e-08
chr13.73959742.73960730	2.30391	0.000740345	2.27213	0.000104924	chr3.29213380.29214145	2.69837	7.69892e-05	1.55877	0.00327534	chr12.46566162.46567060	1.88085	0.00318793	1.4541	0.00512564
chr13.74169326.74170284	2.32262	2.04719e-05	1.91539	0.000241446	chr3.29337639.29338485	2.8102	3.16062e-07	2.15815	2.84548e-08	chr12.46674444.46674905	2.26925	0.00255092	2.12447	0.000710709
chr13.74180695.74181203	2.45133	0.00165643	2.17182	0.00536746	chr3.31038392.31039132	1.9382	0.000856056	2.22277	6.54076e-07	chr12.46860922.46861610	2.87061	0.000173071	2.34584	0.000155966
chr13.75114829.75115263	1.99013	0.00305231	2.80866	8.50072e-05	chr3.31813869.31814856	2.59143	2.84991e-05	2.33468	1.45038e-06	chr12.47121420.47122240	2.65251	0.000297389	2.32714	6.75675e-05
chr13.75402953.75403696	2.64928	0.000113068	2.72323	6.45681e-05	chr3.32799947.32800289	3.00213	0.00115626	2.33633	0.0031005	chr12.47162542.47163668	1.68741	0.00206348	1.3116	0.00104078
chr13.75574283.75574970	2.56737	0.000192667	3.19591	2.36809e-06	chr3.32894434.32895489	3.41803	7.8503e-09	1.08483	0.00288161	chr12.47188105.47188872	2.35609	0.00270403	1.89243	0.00838617
chr13.76057429.76058081	1.88436	0.00542743	2.21138	0.00101314	chr3.33982354.33983365	2.80437	1.7486e-05	1.327	0.00383615	chr12.47400189.47401187	1.94427	0.00153636	1.52708	4.68651e-05
chr13.76478358.76478867	2.84289	0.00155509	2.70064	0.00355902	chr3.34151129.34152640	2.08068	0.000218299	1.88246	1.65179e-06	chr12.47465683.47466690	3.84256	1.55671e-11	2.84992	1.61942e-13
chr13.76895683.76897092	1.93389	0.000954245	1.63545	0.00359962	chr3.34281104.34282347	1.92063	0.000650135	1.30174	0.00105268	chr12.47796879.47797461	2.69639	0.00132134	2.19601	0.00141206
chr13.77295410.77296041	2.98918	1.86342e-05	2.77232	0.000101428	chr3.34464726.34465886	1.79789	0.00260832	1.10913	0.00423174	chr12.48772907.48773654	3.65773	1.28294e-08	2.46078	5.55486e-08
chr13.77508512.77509094	2.84452	0.000438928	3.39558	0.000118533	chr3.34503878.34504780	2.92843	1.17006e-05	1.29414	0.00652449	chr12.48959208.48960341	2.69217	6.25388e-07	1.87773	4.24558e-07
chr13.77630332.77631114	2.45721	0.000413526	3.61952	2.75719e-06	chr3.35512850.35513837	2.65489	0.000742188	1.73361	0.00823447	chr12.49085234.49086684	1.91329	0.00149047	1.529	0.00182326
chr13.78095195.78096321	2.05203	0.000319888	2.11996	0.000157508	chr3.36448057.36448609	2.23668	0.00718528	1.82559	0.00887433	chr12.49450168.49451120	2.09846	0.000233329	1.41436	0.000184337
chr13.78577030.78577887	1.70515	0.00422763	2.42327	5.65464e-05	chr3.36826792.36827880	2.26179	0.000132482	1.54287	0.000136214	chr12.49827775.49829637	2.23069	0.000121178	1.54427	0.000106598
chr13.78656111.78657137	2.85109	3.17667e-07	3.0449	1.7021e-07	chr3.38266987.38267639	2.39818	0.00115467	2.50238	7.36865e-05	chr12.50445104.50445491	2.7457	0.000670465	2.4817	0.000220311
chr13.79044619.79045542	1.98085	0.0031495	2.28451	0.000509331	chr3.39082332.39083467	3.12711	1.84985e-09	3.24958	5.20934e-20	chr12.50477129.50477716	2.57973	1.59764e-06	2.62861	4.83498e-11
chr13.79056728.79058291	2.53448	0.000103976	2.51145	0.000126965	chr3.39340950.39341698	2.775	2.8533e-05	2.27979	1.75127e-05	chr12.50835028.50835618	3.39993	8.27615e-06	2.01525	0.000313927
chr13.79576522.79577230	2.59297	0.000459128	2.04851	0.00472843	chr3.42872012.42872889	2.27893	0.00024117	3.25492	2.45398e-13	chr12.51017922.51018646	3.48036	5.31936e-10	1.44886	5.90409e-05
chr13.79784442.79785623	1.91642	0.00451826	1.9456	0.00291181	chr3.42927549.42928222	3.06828	5.69485e-05	1.63994	0.00580631	chr12.51051306.51052327	2.66339	2.77684e-05	1.48614	0.00303358
chr13.79912658.79913471	2.44731	0.000891825	1.94792	0.00974841	chr3.42935171.42936329	2.00464	0.00187874	3.10982	1.49318e-08	chr12.51215104.51215927	2.02718	0.0023605	1.47945	0.00553064
chr13.79980095.79980941	2.09662	0.00996201	2.51508	0.00214189	chr3.43242037.43242726	2.17294	0.000683553	2.09141	4.68917e-05	chr12.51719808.51720585	3.5962	7.04083e-09	1.80403	1.73299e-05
chr13.80709465.80710338	1.58171	0.00615633	2.18057	0.000127471	chr3.43337442.43338188	2.85492	3.58225e-05	1.86142	0.000532246	chr12.52739368.52740027	2.169	0.000429822	1.97962	2.9544e-05
chr13.80826784.80827558	2.35937	0.000175021	2.72324	1.5971e-05	chr3.45142410.45143071	3.1538	6.96084e-05	2.01492	0.00172606	chr12.52834079.52834621	2.41814	0.00053459	2.00009	0.000519252
chr13.81824479.81825382	2.20311	5.65711e-05	2.6273	3.59796e-06	chr3.45677632.45678421	2.95849	2.60355e-06	1.89723	6.23342e-05	chr12.52863344.52864330	2.54117	0.00020391	1.72337	0.00241624
chr13.81855903.81856666	2.38552	0.000651017	2.77522	0.000141137	chr3.45783405.45784220	2.81892	0.000391668	1.94773	0.00323353	chr12.53069937.53070436	2.92773	8.11002e-05	2.5313	2.69837e-05
chr13.81861697.81862623	2.43886	3.25908e-05	2.76016	2.29498e-06	chr3.47058831.47059712	3.253	1.83272e-06	1.98029	5.62203e-05	chr12.53483021.53484124	2.0828	0.00194182	1.7183	0.0028089
chr13.82308169.82308959	1.78707	0.00381845	1.97417	0.00117918	chr3.47316073.47317033	2.4446	0.000106948	1.34457	0.00192283	chr12.53665312.53666056	2.84132	0.000224839	1.69853	0.00566401
chr13.82561990.82563123	1.61501	0.00960283	2.54634	6.0331e-05	chr3.49926959.49928283	2.73379	2.28909e-05	1.41284	0.0021516	chr12.53757594.53758205	2.12277	0.000402413	1.99069	2.20852e-05
chr13.82585996.82586701	1.94736	0.0040146	2.45925	0.000272929	chr3.50014257.50015010	2.16123	0.000263377	2.83061	4.98375e-09	chr12.53793428.53794106	2.52852	0.000889499	2.2859	0.000237284
chr13.82719168.82719876	2.34704	0.00100694	2.36225	0.00113412	chr3.50139739.50140810	2.9066	1.95574e-06	1.74416	3.85091e-05	chr12.54449700.54450495	1.91488	0.00167703	1.39899	0.00366836
chr13.82907441.82908229	2.24018	0.000954245	2.35778	0.000482474	chr3.52842772.52843597	2.588	0.000480004	1.63018	0.00632698	chr12.55921517.55922051	3.48061	2.19901e-08	2.68157	6.03188e-08
chr13.82937843.82938290	2.13426	0.00288528	2.17213	0.00336307	chr3.53764011.53764764	2.09952	0.000765742	2.30985	4.46635e-06	chr12.56005698.56006785	3.42208	6.84263e-07	1.41469	0.00415316
chr13.82942595.82943698	1.53605	0.00634241	2.98242	1.30032e-07	chr3.53965063.53965702	2.24446	0.000295385	1.78264	0.000144982	chr12.56079053.56079497	3.03482	0.000559405	2.38419	0.000742732
chr13.83077017.83077860	2.57855	4.17921e-05	3.43442	1.17337e-06	chr3.54445318.54446073	2.96641	6.10081e-05	1.79348	0.00178766	chr12.56088508.56089778	2.84371	2.59285e-08	2.79551	6.88907e-14
chr13.83376099.83376887	2.85607	2.57479e-05	3.62534	1.28761e-06	chr3.54989108.54990040	1.58574	0.00720693	1.62191	0.00020429	chr12.56298382.56298781	2.9604	2.87494e-05	1.43184	0.00668753
chr13.83542582.83543059	2.00591	0.00283183	3.52808	3.1784e-06	chr3.55935075.55935772	1.91911	0.00705577	1.77615	0.00276085	chr12.56317330.56318645	2.39954	9.76542e-06	1.8538	1.64282e-06
chr13.83588138.83588596	2.3752	8.80432e-05	4.09515	1.27133e-08	chr3.56302392.56303300	1.79799	0.00166894	1.31587	0.000742732	chr12.56376663.56377158	2.43747	0.00403197	2.01885	0.00456145
chr13.83666662.83667395	2.27913	0.000439781	3.1255	6.4967e-06	chr3.56753418.56754323	2.06423	0.000661073	1.50808	0.000899145	chr12.56481918.56482224	3.11838	2.02469e-05	1.46857	0.00561719
chr13.84368036.84369025	1.95774	0.00324236	2.26978	0.00061951	chr3.57677485.57678393	2.72236	1.96632e-05	1.29913	0.0044198	chr12.56490614.56491191	3.34588	5.01341e-06	2.10654	0.000140085
chr13.87763505.87764449	2.43244	0.000818823	2.24157	0.00228253	chr3.57919266.57920760	2.05903	7.05061e-05	2.01598	6.5937e-09	chr12.57355572.57356359	3.49733	1.31063e-07	2.23116	1.97763e-06
chr13.88364035.88364521	3.23914	0.000214001	4.22779	3.70067e-05	chr3.58024356.58025819	1.78683	0.0015566	1.70686	3.23038e-05	chr12.57457392.57458173	2.56563	2.70737e-05	2.13688	4.45914e-06
chr13.89286566.89287397	1.96824	0.000678117	2.70448	4.33694e-06	chr3.58887950.58889018	3.3835	2.17538e-09	2.41031	9.62917e-11	chr12.58410925.58411790	3.12223	2.92637e-07	2.63036	2.867e-08
chr13.89323982.89325258	1.76529	0.00155509	2.5997	1.44744e-06	chr3.59149424.59150432	1.83762	0.00316596	1.76519	0.000287464	chr12.58706309.58707381	2.19079	0.00129159	2.1026	0.000311288
chr13.89463569.89464366	2.07503	0.0076353	2.01272	0.00960664	chr3.59476950.59478485	1.99876	0.00174948	1.78328	0.000368137	chr12.58901303.58901723	3.87613	4.16869e-05	2.12477	0.00210434
chr13.90334977.90335989	1.65106	0.00406703	1.54249	0.00635293	chr3.60281831.60282688	2.69093	8.26857e-06	1.89577	1.09681e-05	chr12.59752860.59753325	2.73893	0.00126448	2.37301	0.000762576
chr13.90364363.90364983	2.05541	0.00791146	2.1057	0.00746745	chr3.60461686.60462629	1.5729	0.00975029	1.91999	4.68651e-05	chr12.59772342.59773038	3.27162	8.92682e-06	2.17388	0.000184908
chr13.90795173.90795852	2.88021	0.000427302	3.39513	0.000266553	chr3.63481933.63482706	2.52341	6.74073e-05	1.40498	0.00235176	chr12.60589419.60590309	2.3324	0.000448981	2.35207	3.86085e-06
chr13.91072104.91072831	2.05643	0.000874265	2.26327	0.000152465	chr3.65228359.65229044	2.80198	6.70804e-06	1.62241	0.000342991	chr12.60602103.60603005	2.85147	2.05521e-05	2.35306	9.70606e-06
chr13.91446539.91447351	2.1808	0.00157208	3.01432	1.41045e-05	chr3.65240647.65241222	2.95369	8.87839e-06	2.06303	7.39429e-05	chr12.62217977.62218928	2.77436	1.13677e-05	1.91235	3.2143e-05
chr13.91660663.91661647	2.26522	0.000201817	2.26406	0.000154542	chr3.66198053.66198844	3.16462	4.19036e-07	3.00872	2.89347e-09	chr12.62937795.62938456	2.78852	0.00120737	2.25619	0.00112167
chr13.92196713.92197400	2.30112	0.00713232	2.26221	0.0080147	chr3.68240388.68241103	2.51586	0.000531364	1.63469	0.00517089	chr12.63626556.63627436	2.34751	0.000902867	1.95657	0.00089291
chr13.92668119.92668888	2.34193	6.94681e-05	3.30842	1.25265e-07	chr3.68372999.68373484	2.58528	0.000969363	2.46983	0.000192896	chr12.63809188.63809875	2.25834	0.00189762	1.74832	0.00315142
chr13.92973617.92974486	2.10386	0.00192226	2.91674	5.77662e-05	chr3.68512028.68512789	1.63481	0.00348831	1.74951	1.02468e-05	chr12.63833289.63833743	2.66568	0.000792395	2.07786	0.00159172
chr13.93211704.93212441	2.63494	0.00199636	4.70335	1.51622e-06	chr3.70500612.70501890	2.05431	8.67899e-05	1.67331	4.17287e-08	chr12.64092688.64093335	2.42425	0.00140234	1.62534	0.00833283
chr13.93266879.93267627	2.2024	0.00469024	2.38154	0.00186094	chr3.72323646.72324826	1.70412	0.000976051	1.31417	5.26391e-06	chr12.64226853.64227544	3.34619	1.25344e-05	2.89945	1.36808e-06
chr13.93453344.93453796	2.22475	0.00966887	2.37394	0.00966378	chr3.73103351.73104831	2.54603	2.05506e-05	1.67799	5.53056e-05	chr12.64410581.64411343	2.94812	9.75225e-05	2.16835	0.0003716
chr13.93871087.93872384	2.21273	0.000181659	1.88432	0.000895165	chr3.73610878.73611993	1.44471	0.00740549	1.39146	6.19045e-05	chr12.64585631.64586362	2.21598	0.00360564	2.30199	0.000395794
chr13.95849401.95850418	1.45473	0.00476487	1.81659	0.000195072	chr3.74944574.74945557	2.1301	0.000228396	1.78002	1.44429e-06	chr12.64908122.64908946	3.47999	2.5179e-08	1.7603	1.68787e-05
chr13.96684739.96685290	2.27009	0.000804298	2.83483	8.09898e-05	chr3.76209461.76210021	2.72742	0.000208627	2.78168	5.23461e-06	chr12.65470881.65471623	3.33873	1.01081e-06	2.18037	3.38412e-05
chr13.96782718.96783200	2.44252	0.00339315	2.21753	0.00872851	chr3.76636003.76636919	2.49933	1.07882e-05	2.12573	7.27907e-10	chr12.65668473.65669499	2.99895	1.76753e-06	1.83076	2.95795e-05
chr13.96930867.96931133	3.10433	0.00014394	2.56256	0.00148298	chr3.77197896.77198737	2.12876	0.000330621	2.57309	9.62917e-11	chr12.66057550.66058473	3.37594	1.88718e-06	1.99509	0.000449825
chr13.96932713.96933605	2.47278	1.46106e-05	2.18454	7.4888e-05	chr3.79076822.79077706	2.25804	0.000181108	1.87324	3.1628e-05	chr12.66138084.66138766	3.42415	9.99023e-06	1.5892	0.00411528
chr13.96961325.96962029	1.71614	0.00989958	3.29446	1.59513e-05	chr3.79178108.79179113	1.57251	0.00472	1.07064	0.0043923	chr12.66364812.66365411	3.32836	5.46414e-06	1.89335	0.000436096
chr13.97632898.97633867	2.20186	0.00102131	1.78117	0.00621262	chr3.79503315.79504518	1.71764	0.00655407	1.44796	0.000835526	chr12.67126440.67126828	2.91953	0.000483589	2.29274	0.000586559
chr13.98254907.98255473	2.80834	8.66683e-07	3.17508	2.07304e-08	chr3.80030318.80031334	1.8377	0.00777161	1.51887	0.00605038	chr12.68065205.68066170	3.20676	7.34984e-07	2.20685	3.40097e-06
chr13.98753369.98753834	2.79736	0.000500236	3.35139	0.000196244	chr3.80092908.80093735	1.81917	0.00614029	1.86023	0.000549045	chr12.68162617.68163086	3.16353	1.06255e-05	2.14014	7.19469e-05
chr13.98755099.98755745	2.62176	0.000400309	1.93325	0.00537786	chr3.80206890.80207485	2.00413	0.00100356	2.48824	5.66233e-07	chr12.68728740.68729483	3.99695	7.8331e-09	1.65199	0.000290674
chr13.98825035.98826056	2.14049	0.00234606	2.57444	0.000258271	chr3.80318760.80319733	2.47353	0.00152065	1.71366	0.00670455	chr12.68976617.68977965	2.73594	4.74037e-07	2.24027	7.77747e-09
chr13.99146207.99146898	1.88447	0.00493054	3.36826	7.40111e-06	chr3.81131631.81132713	1.9417	0.00312967	1.39766	0.00375227	chr12.69612344.69613239	1.69122	0.00991662	1.35401	0.00810304
chr13.99147566.99148362	2.35269	4.66349e-05	2.72003	1.53405e-06	chr3.81215417.81216498	1.97036	0.0002792	1.06516	0.000641379	chr12.70097722.70098317	2.08213	0.000479971	1.68004	0.000247528
chr13.99366379.99367794	1.36571	0.00798235	3.34499	1.10488e-10	chr3.82262018.82262774	2.85293	0.000179468	1.58482	0.00593722	chr12.70755936.70756261	2.565	0.00657176	2.54755	0.000685012
chr13.100890459.100890841	1.98253	0.00159422	2.67355	3.36898e-05	chr3.82719791.82720750	1.7165	0.00851546	1.56645	0.00206891	chr12.71252286.71253203	2.28516	0.000915276	1.61959	0.00521611
chr13.100911589.100912335	2.38128	0.000181767	2.85398	5.57598e-06	chr3.83580600.83581528	2.34664	3.21802e-05	2.67642	3.28418e-10	chr12.71536651.71537565	3.06055	4.02938e-06	2.03279	3.67198e-05
chr13.101208441.101209326	2.84547	4.45966e-06	1.9502	0.000685241	chr3.84296353.84297565	1.97595	0.00151504	1.22809	0.00852923	chr12.71976149.71977302	2.23214	7.88722e-06	1.25178	0.000111968
chr13.101215075.101215783	2.44391	0.000252724	2.29132	0.000686142	chr3.88304914.88305605	3.08668	0.000201817	2.05718	0.00203727	chr12.72192072.72192697	2.2492	0.00495349	1.93285	0.00392548
chr13.101487373.101488641	2.62151	1.61784e-05	1.83356	0.00171225	chr3.88449351.88450212	2.59407	0.000307625	1.59495	0.00276958	chr12.72363265.72364146	2.18183	0.00108937	1.33687	0.00997771
chr13.101505000.101505617	2.06815	0.00808956	2.38494	0.00419644	chr3.89971585.89972079	2.31005	0.00751273	2.09195	0.00475514	chr12.72496831.72497981	3.60413	1.32973e-10	1.94243	1.13132e-08
chr13.102989797.102990407	1.82289	0.00807315	2.35031	0.000778414	chr3.92485594.92486783	1.99007	0.00086865	1.7458	7.28015e-05	chr12.72519341.72519845	2.87102	0.000246087	1.8947	0.00218228
chr13.103067562.103068676	1.96973	0.00534102	1.94823	0.00472541	chr3.92983769.92984609	2.15095	0.00261352	2.05054	0.000739734	chr12.73368283.73369521	2.10179	0.000679407	2.02695	2.01372e-05
chr13.103102404.103103292	2.40346	3.11174e-05	2.95736	4.85982e-07	chr3.93127856.93128611	1.9919	0.0025396	1.7407	0.000709982	chr12.73468714.73469395	2.51525	0.00154383	2.04214	0.00184494
chr13.103199895.103200497	2.2549	0.000236517	2.71833	1.70996e-05	chr3.94423487.94424299	2.9153	9.2709e-05	1.89417	0.00128734	chr12.73487600.73488648	2.72345	6.07147e-05	2.57877	1.58655e-07
chr13.103203498.103203923	2.50445	0.000338162	2.94305	4.53922e-05	chr3.95249954.95250610	2.07539	0.00657736	1.80247	0.00539883	chr12.73723992.73724688	2.9073	0.000116065	2.60478	1.2412e-05
chr13.103284885.103285682	2.04225	0.00119907	2.491	0.000130985	chr3.98990685.98991531	2.10568	0.000500442	2.13304	1.23429e-06	chr12.74165885.74166832	3.49786	1.07727e-08	2.15483	1.46498e-06
chr13.103308151.103309098	2.23416	0.000348676	2.39088	0.000109875	chr3.101435270.101436383	1.72567	0.00647361	1.35317	0.00508294	chr12.74519831.74520532	3.95159	2.9877e-08	3.01722	9.53367e-09
chr13.103430538.103431712	1.72706	0.00350285	1.71569	0.0026163	chr3.102337714.102338842	2.55169	1.79612e-05	2.21201	4.55221e-07	chr12.75033979.75034484	4.25369	1.91551e-06	2.10769	0.00128653
chr13.104619216.104620241	1.87742	0.00183272	2.2953	0.000133086	chr3.103571915.103572319	2.96431	8.57054e-05	2.50457	4.39184e-05	chr12.75274048.75274735	3.33102	3.73288e-05	2.19875	0.000348903
chr13.104764728.104765260	2.196	0.00260194	2.89625	0.000209199	chr3.103592294.103593162	1.88439	0.00553997	1.4683	0.00802575	chr12.75361203.75361794	2.9153	4.33159e-05	1.89639	0.000556987
chr13.104869664.104870299	2.33645	0.000672883	3.22132	1.64278e-05	chr3.104275513.104276113	2.25642	0.00085414	1.44192	0.00567916	chr12.75479358.75479876	2.25473	0.000541722	1.43736	0.0050096
chr13.105108058.105108705	2.08122	0.00234203	2.685	0.000169729	chr3.105511352.105512862	1.38874	0.00969858	1.25664	7.75437e-05	chr12.75686444.75687560	4.2785	5.08305e-12	2.92113	4.76373e-12
chr13.105189501.105189882	3.12509	4.03484e-05	3.06915	8.90797e-05	chr3.105571934.105572705	1.95615	0.000230879	1.03047	0.00222894	chr12.75743186.75743861	2.60591	0.000352837	3.01917	1.1473e-06
chr13.105233988.105235108	1.6257	0.0060614	2.07298	0.000142347	chr3.106087191.106087950	3.36749	2.36854e-07	3.35988	1.75932e-10	chr12.75994930.75995456	3.08388	0.00020611	1.74919	0.00718296
chr13.105658431.105659450	2.17937	0.00135816	2.2078	0.000745192	chr3.107150321.107151445	2.25735	0.000252278	1.50095	0.000745611	chr12.76041747.76042190	2.8532	0.000721792	2.08348	0.00201209
chr13.105920797.105922215	1.79654	0.005964	2.19969	0.000824025	chr3.107175352.107176101	2.50941	0.000264376	1.56268	0.00179574	chr12.76087215.76088022	2.10019	0.00224711	1.71092	0.00350983
chr13.105937785.105938190	2.75816	0.000697434	2.86235	0.000698473	chr3.108073349.108074222	2.58223	0.000202137	1.5001	0.00529292	chr12.76349108.76350204	2.76772	1.08222e-06	1.9362	1.2513e-06
chr13.105986276.105987116	2.34294	0.00143611	2.32928	0.00126666	chr3.108862952.108863671	2.00513	0.00225475	1.90848	5.69852e-05	chr12.77045458.77046572	1.5632	0.00573406	1.68308	4.68651e-05
chr13.106100182.106100833	2.17121	0.000223279	3.20141	2.23671e-06	chr3.108924652.108925372	2.49541	0.000737592	1.71996	0.0042264	chr12.77519637.77520545	2.53529	0.000337757	1.81266	0.000991635
chr13.106165923.106166854	1.79793	0.00800866	2.03201	0.00304623	chr3.108989560.108990292	2.58996	0.000372786	1.52723	0.00659992	chr12.77634161.77634641	3.52388	1.2168e-06	2.35014	2.92246e-06
chr13.106169687.106170222	2.16886	0.000902285	2.28095	0.000650935	chr3.108995344.108996166	1.59838	0.0073531	1.79951	6.05099e-05	chr12.77715900.77716594	2.49306	0.000134727	1.54537	0.00250606
chr13.106738033.106738522	1.92989	0.00552138	2.70572	0.000214412	chr3.109002672.109003801	2.30393	0.0013902	1.40277	0.00660139	chr12.77788579.77789176	2.90107	0.00130457	1.95401	0.0054581
chr13.107218155.107219077	2.2898	0.00139579	1.84138	0.00823221	chr3.109030686.109031248	1.51679	0.00814214	2.71569	8.14299e-11	chr12.78129316.78130256	3.8973	1.40938e-08	1.73315	1.1765e-05
chr13.107698324.107699826	1.99436	0.00253552	2.51369	8.6257e-05	chr3.109384094.109385174	1.86346	0.00329255	1.41781	0.00337351	chr12.78139612.78140415	3.67848	9.66168e-08	1.78099	9.26756e-05
chr13.108004335.108004720	2.22262	0.00745498	2.68475	0.00263343	chr3.109468262.109469343	1.69289	0.00501806	1.18677	0.00735267	chr12.78194130.78194594	3.17496	7.81144e-05	3.60711	1.87124e-07
chr13.108085991.108086546	2.59788	3.03078e-05	3.01026	1.1941e-06	chr3.114616097.114617085	2.07447	0.0041422	1.81959	0.00250068	chr12.79534955.79536457	2.62427	4.2569e-06	2.05592	2.82788e-06
chr13.108130670.108131433	1.8095	0.00701073	2.32633	0.000657951	chr3.114697692.114698607	2.4635	0.000200257	1.71982	0.000811661	chr12.80087673.80088495	3.40391	1.36492e-06	2.75257	1.18244e-06
chr13.108526614.108527405	1.94719	0.00279354	2.673	7.68511e-05	chr3.116147557.116148929	2.49635	2.44837e-05	1.96959	4.69117e-06	chr12.80272980.80273870	2.03392	0.000345431	1.53844	0.000193485
chr13.109671611.109672439	1.92058	0.002622	2.63054	0.000121744	chr3.116199679.116200791	2.93476	1.35135e-08	1.82473	3.66139e-08	chr12.80740054.80740430	1.93284	0.00298611	2.54666	1.19829e-06
chr13.110211232.110212278	1.87268	0.00347495	1.68576	0.00995089	chr3.116239918.116240553	3.0173	1.1918e-05	1.46542	0.00324796	chr12.81133102.81134647	2.39386	0.00112412	1.57321	0.0057789
chr13.110673500.110674158	2.49363	0.000811327	2.47142	0.00103637	chr3.116244453.116245057	1.65787	0.00582902	1.85938	4.8014e-05	chr12.82259308.82260071	1.89619	0.00105767	2.45415	9.28566e-08
chr13.110841843.110842618	2.2068	0.00143975	1.77653	0.00861864	chr3.116247619.116248185	2.38085	0.00045464	2.08521	0.000257739	chr12.82774454.82775125	2.44983	0.000981884	2.20126	0.000323096
chr13.111030090.111030873	2.26674	0.0028063	2.13642	0.00493756	chr3.116279725.116280721	2.32739	0.000472594	1.78952	0.000476938	chr12.82805823.82806686	2.58212	0.000146591	3.68172	2.76076e-10
chr13.111394297.111395503	1.5569	0.007689	2.69816	2.44409e-05	chr3.116289824.116290975	2.78251	9.07005e-06	1.87513	7.19168e-07	chr12.82810359.82810598	2.54659	0.00516745	2.92352	0.000244866
chr13.112637566.112638443	2.5372	0.000328754	2.36197	0.00069554	chr3.116320783.116321289	2.75496	0.000316444	2.54333	0.000130869	chr12.82825797.82826425	3.20042	5.17322e-05	2.08606	0.000963619
chr13.112910097.112910935	2.04898	0.00439799	2.45676	0.00103805	chr3.116324146.116324774	2.26779	0.00084509	1.42107	0.00456646	chr12.82894962.82896121	2.3171	0.000345644	2.34238	1.35499e-06
chr13.113439871.113440624	2.30522	0.00103672	2.10466	0.00266937	chr3.116992773.116993871	2.06929	0.000970241	2.05706	2.08225e-05	chr12.82979010.82979753	3.58529	3.72981e-07	2.4334	7.91854e-06
chr13.113482719.113483495	2.38912	4.69694e-05	2.66657	6.54433e-06	chr3.118625976.118627059	2.41089	5.86356e-05	2.10418	2.99943e-06	chr12.84805102.84805977	3.61527	1.25831e-07	2.09119	1.58734e-05
chr13.113655001.113656069	2.03081	0.000396751	2.56105	1.49168e-05	chr3.120668690.120669364	2.98658	1.91634e-05	2.68475	2.50085e-06	chr12.86216465.86217318	2.48113	7.95825e-06	1.52098	7.9781e-05
chr13.113656865.113657568	2.50696	5.31417e-05	3.26858	6.93146e-07	chr3.120858045.120859015	2.22385	0.00034546	1.72775	0.000302435	chr12.86360830.86361690	2.16423	0.00270548	1.59527	0.00673159
chr13.113682693.113683620	2.03118	0.00111521	2.38295	0.000114449	chr3.121009055.121009778	2.49165	0.000500442	1.55667	0.00543684	chr12.86379175.86380394	2.06426	0.000868834	1.76886	0.000776213
chr13.113903268.113904418	1.97301	0.00335579	1.80617	0.00816153	chr3.121201058.121202049	2.03203	0.0012484	1.39955	0.00076216	chr12.86453523.86454146	2.13687	0.0043171	2.07722	0.00165462
chr13.114107251.114107939	2.6632	0.00027465	3.06412	8.09949e-05	chr3.121480098.121481533	1.71451	0.000547872	2.09457	2.55018e-12	chr12.88427904.88429311	1.7882	0.000318322	1.39966	9.36691e-06
chr13.114130652.114131666	1.93882	0.0025019	1.70539	0.00644686	chr3.121824850.121825558	2.50477	0.000587868	2.18438	0.000282075	chr12.89269292.89270065	2.11967	0.000807872	1.88015	0.000168545
chr13.114874672.114875176	3.01769	1.14668e-05	3.0253	1.32585e-05	chr3.122298244.122298956	1.69219	0.00398761	2.54402	1.7984e-07	chr12.89824854.89825749	2.06797	0.000169043	1.0052	0.009521
chr13.115052318.115052993	2.43666	0.000591318	2.45072	0.000732601	chr3.123193465.123194458	2.82442	1.81981e-06	2.71959	2.85633e-09	chr12.90024752.90025298	2.99049	0.000162707	2.48336	0.000117504
chr13.116110935.116111613	2.65573	0.000563099	2.69795	0.000651082	chr3.123207357.123208078	2.83837	2.98231e-05	2.39303	6.76176e-07	chr12.90302472.90303156	2.2197	0.00251298	1.66423	0.00578763
chr13.116529901.116530256	2.58122	0.00423082	2.71364	0.00455893	chr3.124488625.124489902	2.44788	6.09497e-05	2.52108	2.08653e-09	chr12.90638481.90639295	2.77243	0.000283529	1.81339	0.00290841
chr13.116883016.116883558	2.19567	0.00244482	2.46683	0.00107801	chr3.124518298.124519303	2.59945	1.96632e-05	1.70959	8.74936e-05	chr12.91114075.91114928	3.9263	4.46775e-08	3.1606	2.65463e-09
chr13.117048428.117049430	1.66986	0.00549731	2.5643	2.62454e-05	chr3.124711951.124713142	2.25005	9.89671e-05	1.43878	0.000525287	chr12.91265150.91265960	2.54332	7.05057e-05	1.31297	0.00385043
chr13.117401277.117402926	1.91843	0.00164363	1.5391	0.00989009	chr3.124800017.124800865	1.92714	0.00395218	1.4102	0.00754669	chr12.91522152.91522614	2.80971	4.20058e-05	2.5136	6.06357e-06
chr13.117460710.117461636	2.00691	0.00561004	1.94843	0.00676993	chr3.125408974.125409530	2.48274	0.000527999	2.06489	0.000224364	chr12.91894249.91894916	2.09453	0.00334877	1.82659	0.00203218
chr13.117729285.117729793	2.28581	0.0050156	2.57895	0.00175748	chr3.125819603.125820411	2.79514	6.14681e-05	3.14636	4.84305e-08	chr12.92031529.92032120	3.03102	7.3628e-05	1.83607	0.00251359
chr13.117742798.117743371	1.71891	0.00568984	1.78564	0.00340098	chr3.127824105.127825143	1.98143	0.00128043	1.42425	0.00166304	chr12.92163197.92164069	2.85691	2.95684e-05	1.60228	0.00169543
chr13.118234141.118234634	2.34215	0.00173461	3.10844	4.50849e-05	chr3.128420944.128422716	2.13497	6.76471e-05	1.51368	2.64825e-05	chr12.92383948.92384917	2.63706	7.69939e-07	1.63038	8.22715e-06
chr13.118331750.118332327	2.37952	0.00289079	3.23051	8.8486e-05	chr3.129695412.129696667	2.24758	0.000275462	1.29393	0.00413338	chr12.92600510.92601988	2.44519	4.77488e-06	2.24787	1.73808e-08
chr13.118731783.118732752	2.19629	0.000127467	2.44753	2.19397e-05	chr3.129990079.129990816	1.84	0.00517995	1.42701	0.00586255	chr12.92920362.92920862	3.30835	0.000125365	2.04549	0.00337397
chr13.118849454.118850846	2.05767	0.00106841	1.89168	0.00207573	chr3.130860210.130860743	3.0032	5.40576e-05	2.52676	2.8681e-05	chr12.93269499.93270241	3.77651	3.76283e-08	2.57732	3.93974e-07
chr13.119062722.119063265	1.83899	0.00975983	2.29209	0.00188112	chr3.130935081.130936800	1.60688	0.00385128	1.59276	1.12655e-06	chr12.93427759.93428567	1.56844	0.00631944	2.16444	4.59817e-06
chr13.119743158.119744450	2.05191	0.00020553	2.33467	6.75146e-06	chr3.132121383.132122005	1.87445	0.00693691	1.95005	0.000727066	chr12.93433029.93434067	2.27529	0.000346307	1.8494	0.000186484
chr14.7767990.7768546	2.24449	0.00163164	3.37878	1.11205e-05	chr3.132136277.132137583	2.64853	9.02655e-07	2.31698	1.26455e-09	chr12.95024621.95025452	3.11478	9.4254e-06	2.38317	1.44887e-06
chr14.8148844.8149329	2.24072	0.00102501	2.38923	0.000525197	chr3.132425839.132426808	1.57997	0.00674609	1.33489	0.000837288	chr12.95107523.95108217	3.12679	3.7109e-05	2.6699	1.16226e-05
chr14.8249000.8249755	1.77961	0.00927079	1.80519	0.00560738	chr3.132735928.132736652	2.06247	0.00507479	1.68851	0.00294539	chr12.95127653.95128026	2.73218	0.000963112	1.81794	0.00663191
chr14.8470233.8471097	1.98999	0.0061644	2.23863	0.00172639	chr3.133078315.133079439	2.02932	0.00308468	1.86599	0.000892043	chr12.95526312.95526764	2.41459	0.00592193	2.14334	0.00364338
chr14.8584854.8585456	2.52932	0.00076543	2.12496	0.00426339	chr3.133312945.133313456	1.64736	0.00864976	1.91874	0.000113881	chr12.96690392.96690733	3.88139	1.56204e-05	2.47064	0.000408597
chr14.8614952.8616064	2.09853	0.00081671	1.93093	0.00129657	chr3.133557643.133558387	2.14524	0.00106459	1.38027	0.00786377	chr12.96965245.96966028	2.17851	0.000473017	1.78887	0.000218785
chr14.8789243.8790007	2.41462	0.00106005	2.39775	0.00112456	chr3.134307344.134308482	1.98158	0.00203265	1.52419	0.00144599	chr12.97188461.97188741	2.42645	0.00999258	2.08046	0.00775921
chr14.8867471.8868208	2.14035	0.000502311	3.06321	3.48673e-06	chr3.135316651.135317447	2.78351	2.02471e-05	2.05327	3.7534e-05	chr12.97928824.97929991	2.22071	6.16609e-05	1.9729	1.89342e-06
chr14.9070886.9071865	1.68399	0.00678258	2.19758	0.000312158	chr3.136094532.136095083	2.66173	0.000142006	2.22662	7.10298e-05	chr12.97978064.97979318	1.8697	0.000993217	2.00326	5.61682e-06
chr14.9582516.9584250	1.57894	0.00756742	1.70706	0.00352953	chr3.137015027.137015660	3.09998	7.36992e-06	2.08633	6.53661e-05	chr12.98144139.98144996	3.35283	1.32027e-06	1.56124	0.00177194
chr14.9750649.9751857	2.19619	0.000873245	2.09421	0.0013307	chr3.137463623.137464530	2.05377	0.00316506	1.64514	0.00225312	chr12.98501500.98502259	2.9821	2.47095e-06	2.05236	2.56586e-05
chr14.9793265.9793961	2.6498	0.000225821	2.46648	0.000516779	chr3.137739906.137740860	2.4523	0.000860305	1.59343	0.00719478	chr12.98508078.98509076	1.99193	0.000355974	1.68566	4.83759e-05
chr14.10036343.10037203	2.20106	0.000181459	2.68045	7.04866e-06	chr3.137984029.137984840	2.35091	0.000807887	1.52944	0.00574036	chr12.98568392.98568964	2.78537	7.81983e-05	1.90624	0.00054414
chr14.10345825.10346410	2.35601	0.000325572	3.12501	7.96787e-06	chr3.141565175.141566223	2.22872	0.000385107	2.08124	2.08084e-05	chr12.98614382.98615313	2.19512	0.000752756	2.11918	1.17078e-06
chr14.10482685.10483491	1.91967	0.0044508	2.11914	0.0016782	chr3.141997560.141998476	2.74929	4.30603e-05	1.95056	5.26786e-05	chr12.99052390.99053184	2.64471	0.00019217	1.64755	0.00220506
chr14.10630049.10631427	2.54139	2.74016e-05	2.70511	1.5005e-05	chr3.142011525.142012589	2.65776	1.41405e-05	2.57417	9.28566e-08	chr12.99153329.99154360	2.02943	0.00148533	1.32433	0.0079676
chr14.10778560.10779283	2.2307	0.00125001	2.21106	0.00122034	chr3.142237794.142239147	1.94226	0.000894808	1.61377	1.46067e-05	chr12.99544413.99545636	2.18844	0.000293004	1.3865	0.00207746
chr14.11084897.11086046	1.95118	0.00257169	1.87531	0.00707025	chr3.142422086.142423253	2.00225	0.00303904	1.56774	0.00132546	chr12.100018268.100018761	2.7135	0.000645117	1.78155	0.00472058
chr14.11653440.11653982	2.21413	0.00256996	2.34084	0.00139743	chr3.142440173.142440772	1.83094	0.00763052	2.18047	8.32308e-05	chr12.100677622.100678517	2.59818	6.36329e-05	1.77953	0.000359496
chr14.11811019.11811957	1.54407	0.00369198	2.45627	2.62794e-06	chr3.142978502.142979743	2.348	7.84902e-05	1.81651	3.23681e-05	chr12.102437883.102438332	2.0268	0.00156555	1.32611	0.00544747
chr14.12205820.12206889	1.67508	0.00639566	2.29633	0.000173375	chr3.143246082.143246783	2.2298	0.000868698	2.43085	2.18322e-06	chr12.102638707.102639466	1.88949	0.000629289	1.85742	7.80427e-06
chr14.12296194.12296929	2.20858	0.00103282	2.68338	0.000284359	chr3.143252270.143253204	2.11419	7.40713e-05	2.64006	1.12582e-12	chr12.103058476.103059989	2.34363	2.02804e-05	1.7133	1.92653e-06
chr14.12340152.12340866	2.1163	0.00151306	2.742	2.1752e-05	chr3.143292619.143293439	2.33215	0.000316456	2.75881	2.92638e-07	chr12.103296135.103297036	3.43011	4.2769e-07	1.71072	0.000317365
chr14.12345452.12346191	2.02602	0.00582573	2.6589	0.000214074	chr3.144124197.144125036	2.87355	1.22113e-06	2.95243	4.69408e-12	chr12.104239954.104240329	2.77146	0.00119211	2.09582	0.00304345
chr14.12391873.12392295	2.58113	0.000272592	2.32546	0.000855025	chr3.144680470.144681013	2.24786	0.00205733	2.47275	6.71895e-05	chr12.104315894.104316367	2.36579	0.00698555	2.00041	0.00574334
chr14.12448637.12449223	1.90557	0.00708994	2.30884	0.00141338	chr3.145680976.145682061	2.46542	1.67965e-05	1.83289	6.49223e-07	chr12.104490486.104490913	2.28852	0.00778838	2.15123	0.00325883
chr14.12484368.12484952	2.48661	0.00293075	2.35759	0.00595777	chr3.146417379.146417950	2.50662	0.000763359	1.66906	0.00499495	chr12.104575035.104575785	1.73701	0.00590402	1.41911	0.00488469
chr14.12504131.12504978	2.572	1.5678e-05	1.85278	0.00121622	chr3.146527766.146528781	1.91464	0.00133112	1.62914	0.00020464	chr12.104806569.104807413	2.86765	1.10926e-05	1.65744	0.000462413
chr14.12578010.12578599	1.8264	0.0041644	2.15087	0.000348073	chr3.146955572.146956553	2.48452	7.3335e-05	1.1727	0.00912592	chr12.104817231.104818406	2.06541	0.000178874	1.99779	2.23853e-06
chr14.13177588.13178430	2.03269	0.00405065	2.36122	0.000598951	chr3.147229581.147230221	2.03177	0.00278053	1.46374	0.0066308	chr12.104827202.104828444	3.25382	3.2659e-09	2.14628	1.79074e-09
chr14.13328397.13329090	3.02311	0.000125937	2.34518	0.00215292	chr3.149719856.149720897	1.96774	0.00142668	1.61101	0.000349101	chr12.105238811.105239545	3.43779	3.14837e-09	1.80093	2.32943e-06
chr14.13690268.13691028	2.12464	0.00202177	3.11274	3.25298e-05	chr3.150152936.150153823	2.42909	0.000487898	1.50815	0.00582722	chr12.105370698.105371369	2.2401	0.00163891	2.18334	0.000340347
chr14.14353070.14353528	1.93323	0.00562366	2.22423	0.00147232	chr3.151575991.151576781	2.77406	1.21162e-06	2.09812	1.40225e-07	chr12.105997035.105997775	2.71061	0.000597644	1.73314	0.0061358
chr14.14885336.14886290	2.17037	0.000262061	2.48909	3.62544e-05	chr3.152256928.152258051	2.2511	8.45447e-05	2.14492	5.52146e-07	chr12.106824870.106825549	2.09368	0.000850299	2.44664	3.80113e-06
chr14.14990024.14991241	2.26157	0.00027083	2.0936	0.000576923	chr3.152951553.152952124	2.798	0.000139068	1.93723	0.000840288	chr12.107338551.107339347	3.65608	1.24046e-06	2.12062	6.24332e-05
chr14.15205406.15206364	2.3881	0.000201557	2.88481	1.29487e-05	chr3.153188021.153188566	2.09375	0.00436153	1.83707	0.00345247	chr12.107496935.107497625	3.35411	1.72503e-10	1.10876	0.000632128
chr14.16092450.16093699	2.25579	0.00043523	2.23834	0.00034878	chr3.153320023.153321617	2.56888	2.82456e-06	1.82369	9.36511e-07	chr12.107850160.107850939	4.73879	9.66982e-11	1.80309	2.90871e-05
chr14.16695568.16696355	1.84568	0.00147435	2.90859	1.10718e-05	chr3.153337272.153337954	2.07025	0.00514502	1.61644	0.00801745	chr12.108710932.108711226	4.10384	0.000105691	2.45861	0.00168771
chr14.16738548.16739000	2.03806	0.00526419	3.16218	8.90896e-05	chr3.153416202.153417041	1.94446	0.00354096	1.50122	0.00449293	chr12.108917413.108919189	2.75815	2.5166e-06	1.71402	3.8801e-05
chr14.17607138.17607666	2.29943	0.00974971	2.61877	0.0054916	chr3.153791256.153792160	2.04528	0.00167406	1.62124	0.00140658	chr12.112334491.112334876	3.867	6.01474e-06	2.24711	0.000191135
chr14.17621553.17622112	2.35274	0.00167884	3.2479	7.83019e-05	chr3.154385672.154386282	2.11916	0.00263924	1.90923	0.00106185	chr12.112369509.112370424	2.58421	0.000749412	1.64332	0.00171162
chr14.17864898.17865222	2.57692	0.0020629	3.14714	0.000572467	chr3.154741382.154742259	1.96411	0.00732757	1.92164	0.00218374	chr12.117023378.117024038	1.96292	0.00585791	1.90899	0.000774129
chr14.17934649.17935107	2.2095	0.0072374	2.50217	0.00362137	chr3.154815886.154816585	2.5878	4.5301e-05	1.22529	0.00725556	chr13.7506419.7507100	2.03206	0.00346167	1.86055	0.00139379
chr14.18061905.18062932	2.08857	0.0027948	2.69642	0.000284565	chr3.154871407.154872454	2.56591	2.50534e-05	1.9577	1.19001e-05	chr13.8227875.8228338	3.47221	1.8321e-05	1.86085	0.00184731
chr14.18106712.18107894	1.6438	0.00805201	2.62107	7.94862e-05	chr3.155448427.155448870	2.41813	0.0046717	2.06207	0.00457155	chr13.8363351.8364039	3.31579	1.47903e-06	1.97404	9.18646e-05
chr14.18547351.18548122	2.62598	0.00140086	3.96281	4.43388e-05	chr3.156378992.156380315	1.7857	0.00209874	1.34109	0.00121827	chr13.8572100.8572577	2.25864	0.0048386	1.85698	0.0051178
chr14.18581634.18582097	2.63215	0.00272441	3.10518	0.00118139	chr3.159124455.159125078	2.12236	0.00274444	2.34724	1.3552e-05	chr13.10141010.10141790	2.02901	0.00217027	2.48962	8.49942e-06
chr14.18939636.18940596	3.49319	7.36992e-06	2.82239	0.000196784	chr4.4154394.4154928	2.56568	0.00440066	2.25349	0.00358475	chr13.11532690.11533710	2.55579	3.33612e-05	2.41868	6.00226e-07
chr14.18983879.18984330	2.82957	0.000616125	2.99339	0.000783616	chr4.4199180.4200124	2.68597	7.76092e-05	2.26805	3.52263e-06	chr13.13505313.13505972	2.27201	0.00152894	1.71213	0.00367936
chr14.19874202.19875089	2.75143	2.08673e-05	2.67325	3.33612e-05	chr4.4215921.4216519	3.2989	4.69694e-05	2.06425	0.000925749	chr13.13966308.13967029	2.22302	0.00105217	1.85376	0.000265525
chr14.20268287.20269199	2.4337	0.00117368	1.93066	0.00728649	chr4.4696456.4697566	2.01161	0.00199922	1.65062	0.00164604	chr13.14467319.14467964	3.17564	2.52663e-09	3.0895	2.44771e-16
chr14.20436713.20437301	2.33393	0.00260834	2.51522	0.00101952	chr4.4839792.4840796	2.31057	0.000298684	2.29884	2.50312e-07	chr13.18165427.18166241	2.0522	0.000534897	2.17322	4.56596e-07
chr14.20458672.20459306	2.22356	0.00480428	2.2008	0.00428668	chr4.5587494.5588209	2.95044	0.000159864	2.59452	3.16117e-05	chr13.18235174.18235865	1.97541	0.00500368	1.67952	0.00303293
chr14.20825389.20825871	3.63006	5.80097e-05	3.42965	0.000189311	chr4.5685493.5685865	2.06418	0.00398085	1.77582	0.00276387	chr13.18287484.18287984	3.17893	9.75867e-05	2.17076	0.00074413
chr14.20831542.20832312	2.01712	0.00347338	3.63506	6.06854e-06	chr4.6205218.6205673	2.3107	0.00505196	2.23594	0.00189454	chr13.19800900.19801535	3.50786	6.66431e-06	1.98636	0.00053647
chr14.21341177.21341554	2.98404	0.000752316	2.91126	0.00115439	chr4.7363854.7364980	1.55673	0.00870245	1.57676	1.90743e-05	chr13.19876207.19877073	2.49379	0.00029959	1.46487	0.00802324
chr14.21637107.21637739	1.80804	0.00660754	2.25269	0.000747442	chr4.7829113.7829978	2.34084	0.000262065	2.7754	2.30946e-07	chr13.19923404.19924072	2.89498	5.19771e-05	2.20149	0.000178402
chr14.21693860.21694287	2.65337	0.00332151	2.8484	0.00273105	chr4.8749879.8751267	1.56021	0.00740817	1.73686	3.73882e-05	chr13.20012619.20013758	2.16087	0.00109594	2.15465	7.55545e-05
chr14.21772555.21773549	1.70725	0.00484377	1.64922	0.00517007	chr4.9161228.9162982	1.81292	0.00217586	1.62504	0.000214624	chr13.20052571.20053670	1.57311	0.0017051	1.3251	0.00012664
chr14.21931740.21933393	2.3196	0.000117882	2.81555	5.87205e-06	chr4.10744673.10746027	2.31016	3.0746e-05	2.63077	2.35369e-10	chr13.20192227.20193380	2.78859	1.24522e-06	1.24844	0.00119135
chr14.22445097.22446394	1.87957	0.00215301	1.59332	0.00801075	chr4.12517749.12518848	2.24249	0.000325572	1.49742	0.00159964	chr13.20314255.20314944	3.05948	1.27897e-05	2.27327	1.90113e-05
chr14.23486364.23487254	2.44087	7.69876e-05	2.01714	0.000629406	chr4.12879841.12880665	1.78996	0.000811623	2.47758	3.11161e-10	chr13.20369789.20370801	3.88002	5.23035e-10	2.43988	6.52241e-09
chr14.23786213.23787071	1.91966	0.00265051	2.07948	0.00129396	chr4.15084039.15084746	2.45109	0.00204333	2.30461	0.000831558	chr13.20450612.20451287	3.01593	4.05044e-07	1.08886	0.00785949
chr14.23796850.23797331	2.91109	0.000113068	3.65034	7.56425e-06	chr4.15385114.15386310	1.77103	0.00220499	1.89143	3.23258e-06	chr13.20454110.20454885	2.26581	4.99127e-05	1.60972	2.16543e-05
chr14.24020613.24021340	2.92546	0.000196098	2.55492	0.000946072	chr4.15850719.15851770	2.31217	0.000752316	1.74114	0.00119165	chr13.20619892.20620390	2.6358	1.92864e-05	2.16004	7.02935e-06
chr14.24140249.24140968	1.9539	0.00252846	2.36565	0.000219825	chr4.15895659.15896174	2.28915	0.000909651	2.20148	5.0117e-05	chr13.20684299.20684988	2.40518	0.000285269	1.88391	0.000360338
chr14.25312824.25313713	2.44487	0.00173812	1.99724	0.00409816	chr4.16056138.16057063	1.99248	0.00687795	1.90969	0.00253124	chr13.21706607.21706852	2.56004	0.000495371	2.1485	0.000167637
chr14.27269502.27270391	2.22813	0.000377913	2.71067	6.6275e-05	chr4.17787195.17787823	2.86771	1.15934e-05	2.05366	3.12151e-05	chr13.23111482.23112490	3.38063	3.74994e-06	2.47267	1.6593e-05
chr14.27720999.27721510	2.99575	0.000218987	2.27185	0.00575788	chr4.19247345.19248011	2.59792	0.000596428	2.85973	5.80225e-06	chr13.23958631.23959298	2.64604	0.000584741	2.75959	7.02935e-06
chr14.28820951.28821720	2.24571	0.00135484	2.80546	0.000121201	chr4.19867526.19868244	2.79916	4.58997e-05	1.41375	0.00589382	chr13.24201371.24201804	2.36447	0.00205548	1.72366	0.00607218
chr14.29769188.29770160	1.92186	0.00258457	2.84587	1.39643e-05	chr4.20113882.20115002	1.84978	0.00214052	1.32264	0.00217722	chr13.24383472.24384339	2.75674	1.5434e-07	1.32574	0.000165622
chr14.29818268.29818728	2.42671	0.00715331	3.23004	0.00117765	chr4.20526632.20527954	2.26591	3.08813e-05	1.69054	4.17184e-10	chr13.24861819.24862861	2.10883	1.32286e-05	1.39314	9.00854e-06
chr14.29866350.29867675	2.37769	0.000202357	2.20415	0.000282221	chr4.20573251.20574045	2.16849	0.00291904	1.69713	0.00643986	chr13.25345700.25346365	2.12255	0.0019658	1.88297	0.00060138
chr14.30124758.30126075	1.54803	0.00820614	2.24106	0.000154365	chr4.20722826.20723795	2.15185	0.000581972	1.35649	0.00413548	chr13.26001648.26002492	2.92204	0.0003857	1.79133	0.00789146
chr14.30297334.30298225	2.08223	0.0023295	2.83372	8.72311e-05	chr4.20755993.20756973	1.74214	0.00587629	1.61779	0.000492685	chr13.26433614.26434733	3.47128	1.3391e-07	2.25146	7.68912e-06
chr14.30746169.30746562	2.26997	0.0059129	2.74685	0.00184131	chr4.21543301.21544123	2.69751	0.000278875	2.10997	0.000584476	chr13.26518929.26519678	2.84052	4.08501e-05	1.60774	0.00178718
chr14.31410742.31411130	3.26646	1.94912e-05	2.69081	0.000252744	chr4.21953720.21954386	2.27863	0.00030301	1.97293	6.4668e-05	chr13.27667093.27667898	2.93835	3.54098e-05	2.50566	1.6601e-05
chr14.32002797.32003515	2.18648	0.00257169	3.50403	2.11782e-05	chr4.22046795.22047579	1.96752	0.00474204	1.95576	0.000683952	chr13.27714188.27714831	2.79316	0.000445475	2.36421	0.000294487
chr14.32527093.32527504	2.0649	0.00659025	2.59465	0.00116844	chr4.22240151.22240722	1.85839	0.00921646	1.57705	0.00644735	chr13.28454491.28455689	1.82425	0.000635513	1.91684	1.89949e-06
chr14.33179916.33180812	2.05809	0.00679736	2.22374	0.00427929	chr4.22268760.22269503	3.03642	2.21726e-06	1.68989	0.000192607	chr13.28482423.28483177	3.35075	1.95932e-05	2.99371	1.95653e-06
chr14.33532588.33533462	1.79859	0.00384937	1.87462	0.00100332	chr4.26042907.26043804	3.21321	2.21734e-06	2.37881	7.22225e-06	chr13.28649241.28649790	2.24093	0.000987195	1.53486	0.00475167
chr14.33573438.33574001	2.80379	0.000262228	2.43215	0.00189064	chr4.29742222.29743181	3.15966	7.24309e-07	2.33838	2.1304e-06	chr13.28680590.28681690	2.11444	0.000514859	2.31733	1.89084e-06
chr14.33579706.33580590	1.54371	0.00465452	2.6567	3.90127e-07	chr4.29822128.29823005	3.18186	3.48887e-05	2.23548	0.000250462	chr13.28709409.28710414	1.71416	0.00212399	1.37138	0.00110697
chr14.34178959.34179886	1.98864	0.00330111	2.32601	0.000306331	chr4.31559185.31559859	2.55255	4.07772e-05	2.16152	1.03504e-05	chr13.28774481.28774976	1.99894	0.00349096	1.92634	0.000645831
chr14.34884025.34885183	1.819	0.00355534	1.91741	0.0017737	chr4.32363360.32364533	2.04841	0.000694418	1.91136	1.93334e-05	chr13.28778185.28778863	2.84615	6.02968e-05	2.37108	5.30819e-05
chr14.35950072.35950806	2.71729	0.000952646	3.43332	0.000169483	chr4.33201861.33202710	2.86168	0.000199862	2.15661	0.000605423	chr13.28928874.28929660	3.01332	1.00985e-06	2.23705	0.00990227
chr14.36114283.36115062	2.35671	0.00193906	3.02906	0.000128873	chr4.33510439.33511209	2.31338	7.06462e-05	2.14263	7.52755e-07	chr13.29123186.29124562	3.08794	4.53131e-09	2.65417	2.21255e-11
chr14.37066509.37067221	2.03709	0.00226332	2.86229	4.8778e-05	chr4.33552306.33553050	2.37543	0.00116916	1.84787	0.0024858	chr13.29629519.29630431	2.39843	0.000183711	1.91907	0.000166251
chr14.37468371.37469463	2.57412	0.000690092	2.5866	0.000556845	chr4.33657608.33658583	2.69872	1.77879e-06	2.30822	6.39159e-09	chr13.30124206.30125220	2.77506	1.5844e-05	2.24003	3.00551e-05
chr14.37795552.37796376	1.9182	0.00616177	2.43607	0.0011312	chr4.33874362.33874873	2.94984	0.00045464	1.95329	0.0046221	chr13.30161246.30161766	2.77099	0.000733176	1.86575	0.00825628
chr14.38637097.38637469	2.3993	0.00363758	2.47234	0.00456486	chr4.34755616.34756967	2.4722	0.000102904	2.11606	1.79948e-05	chr13.30217629.30218392	3.02089	1.39995e-06	2.27509	1.17552e-06
chr14.38796557.38797693	2.21671	0.000781078	2.31979	0.000182729	chr4.35396010.35396738	2.34383	0.00178666	2.03467	0.000989348	chr13.30379195.30379935	1.68338	0.00842924	2.48229	1.0973e-05
chr14.39022946.39023690	1.85795	0.00773098	2.80228	0.000187313	chr4.35680728.35681595	2.7043	7.90805e-05	2.36758	2.39131e-05	chr13.30955677.30956737	2.22625	0.000263283	1.5537	0.00101568
chr14.39039011.39039434	1.77735	0.0061756	2.09596	0.00201717	chr4.38105381.38106089	3.37216	4.44897e-06	2.00982	0.000443963	chr13.31161473.31162049	2.3138	0.00115245	2.76278	7.85475e-06
chr14.39106538.39107346	1.68752	0.00593948	1.76479	0.00292912	chr4.39344222.39345593	2.15636	0.000168972	1.35271	0.00108182	chr13.31436292.31436789	3.19876	0.000168995	2.26888	0.000676837
chr14.39355811.39356849	1.99509	0.00160245	2.37078	0.000246749	chr4.39933782.39934856	1.47367	0.0095579	1.13455	0.00333082	chr13.31542860.31543568	1.87718	0.00394986	2.34761	1.04843e-05
chr14.39677489.39678959	2.8	6.86284e-06	2.62853	2.48237e-05	chr4.39948992.39949348	2.71825	0.00347338	2.25154	0.00484126	chr13.31826882.31827388	2.36609	0.00269415	1.93822	0.00247061
chr14.40308307.40309043	2.01557	0.00344934	3.11288	2.75651e-05	chr4.41107139.41108382	1.65208	0.0056981	2.68875	1.39283e-10	chr13.31876955.31877727	1.94611	0.00158314	1.77118	0.000273429
chr14.40885148.40885724	2.61692	0.000359994	3.04256	9.75867e-05	chr4.41566127.41566513	1.86678	0.00354512	1.66102	0.00101952	chr13.32435074.32435913	2.98634	1.24679e-06	2.16253	1.65111e-06
chr14.40958141.40958492	1.98806	0.00316417	1.95355	0.00342947	chr4.41583266.41583769	3.13147	7.20946e-06	2.71682	1.40326e-06	chr13.32628797.32629639	3.89533	1.49019e-09	2.06666	1.10629e-06
chr14.44580650.44581521	2.20989	0.00288492	2.09565	0.00491515	chr4.42895103.42895579	2.83528	0.000183039	2.5237	7.52276e-05	chr13.34316471.34317571	1.57835	0.00160042	1.00168	0.00125051
chr14.45049623.45050669	1.87348	0.00045933	2.01933	0.000119657	chr4.44876589.44877182	2.01509	0.00444351	1.64083	0.00390815	chr13.35159958.35161174	2.25688	0.000188586	1.53881	0.000750218
chr14.45184426.45184888	2.60208	0.00619092	3.21568	0.00125474	chr4.45458654.45459067	2.71129	0.000193303	1.84737	0.00144107	chr13.35413883.35414473	2.37299	0.00263031	2.51357	0.000312872
chr14.45549896.45550755	2.19925	0.000868664	3.31732	1.24032e-06	chr4.45874249.45875065	3.27998	3.00311e-05	2.9326	8.18304e-06	chr13.36571214.36571923	3.89801	5.47153e-08	2.89846	4.70797e-08
chr14.46149015.46149768	2.7248	0.000116446	3.34008	9.48335e-06	chr4.46428845.46429874	3.00812	4.56609e-08	1.40214	2.03704e-05	chr13.36890894.36891516	2.06867	0.00796919	1.9127	0.00407996
chr14.46175503.46176388	1.96123	0.00277775	1.83989	0.00742467	chr4.47698308.47699392	2.93329	1.17893e-07	1.78037	1.34769e-06	chr13.36971610.36972646	1.76847	0.00227107	1.15218	0.00566193
chr14.46745300.46745831	2.36255	0.00284024	2.95005	0.000512041	chr4.47940769.47941459	2.50037	0.00114965	1.70733	0.00760521	chr13.37143537.37144827	2.67153	3.29027e-06	1.32066	0.000987076
chr14.46898317.46899168	1.9049	0.000228061	3.2327	1.00782e-09	chr4.52598266.52599284	2.12459	0.00290236	1.51748	0.00819755	chr13.37253120.37253707	3.20134	2.95673e-05	1.55354	0.00665989
chr14.47376624.47377248	2.07123	0.0097198	2.54424	0.00123306	chr4.52744105.52745400	1.94651	0.00189627	1.66083	0.000395619	chr13.37396689.37397280	3.91985	4.5137e-08	2.98732	1.48111e-08
chr14.47525398.47526397	2.11594	0.000243386	1.4485	0.00791239	chr4.53799261.53800298	2.15379	0.00179234	1.72397	0.00156989	chr13.38770683.38771721	1.87565	0.000511535	1.86747	2.89232e-06
chr14.47658806.47659434	2.47615	0.000330621	2.97662	4.16869e-05	chr4.54232448.54233376	2.55715	7.59525e-05	1.84108	0.000211577	chr13.38798095.38798983	2.69475	4.16638e-05	1.77559	0.000413946
chr14.47684418.47684982	2.11356	0.00635082	2.55001	0.00159412	chr4.54550856.54551576	1.86879	0.00721102	1.62235	0.00384342	chr13.39472541.39473517	2.11868	0.000960458	1.26216	0.00416002
chr14.49072720.49073296	2.51051	0.000557517	3.26723	3.28405e-05	chr4.55603704.55604380	1.93567	0.00651434	1.95087	0.00109186	chr13.39522199.39522987	2.77088	0.000190122	1.74823	0.00269299
chr14.49073884.49074516	3.61547	1.00589e-06	3.92777	4.78164e-07	chr4.55723050.55723660	2.21489	0.000928925	2.25835	5.0591e-05	chr13.39685096.39685407	3.63729	0.00015518	1.97267	0.00787879
chr14.49635797.49636524	2.33337	0.0023844	2.17168	0.00427964	chr4.55824058.55825814	2.75075	3.66004e-07	2.29472	2.51959e-10	chr13.39779036.39779814	1.82455	0.00267769	2.22332	2.36285e-06
chr14.49766530.49767827	2.38113	0.00010078	2.32731	9.84404e-05	chr4.55843504.55844536	2.29532	6.18461e-05	1.84598	6.16784e-06	chr13.40034397.40035146	2.71775	0.000121744	1.80615	0.00149583
chr14.50826567.50827545	2.96729	1.26603e-05	3.17279	1.39058e-06	chr4.56993221.56993617	1.90955	0.00481244	3.29869	2.18091e-07	chr13.40105411.40106323	2.82061	6.17132e-05	1.92732	0.000266237
chr14.51031457.51031900	2.77449	0.00212649	2.48565	0.00693093	chr4.57060176.57060888	2.85733	1.34586e-05	1.73778	0.000188566	chr13.40185484.40186079	2.79988	6.60152e-05	2.42355	1.53114e-05
chr14.51896594.51897231	2.05861	0.00731939	2.33565	0.00414355	chr4.58170439.58170999	3.32647	1.63625e-06	2.84122	1.15765e-06	chr13.40243210.40244298	1.71265	0.00458724	1.62627	0.000623561
chr14.52310859.52311426	1.97045	0.00778905	2.38767	0.00172005	chr4.58205659.58206979	1.55922	0.00552051	1.08242	0.00506137	chr13.40470602.40471511	2.30529	0.000922225	1.79584	0.00134981
chr14.52368466.52369407	2.80288	0.000198533	3.26866	5.04418e-05	chr4.59375620.59376217	2.79847	7.40603e-05	1.96052	0.000977313	chr13.41185886.41186966	1.7075	0.00173437	1.9246	1.00631e-06
chr14.54086285.54087177	2.45008	0.0010049	3.66145	7.75499e-06	chr4.64021628.64022284	2.79807	6.6258e-06	1.76582	8.56526e-05	chr13.41257605.41258400	1.87264	0.000987195	1.60732	0.00017835
chr14.54664387.54665212	2.02823	0.000601993	2.37079	6.99402e-05	chr4.66292835.66293543	1.93953	0.00774587	1.65521	0.00624559	chr13.41486230.41487049	2.38023	0.000514179	2.18662	0.000124902
chr14.54775647.54776276	1.86487	0.00269418	2.95859	1.1481e-05	chr4.66330568.66331994	2.07629	0.000489668	1.15	0.00576545	chr13.42317297.42317813	3.23202	0.000397087	2.25152	0.00205414
chr14.56284435.56285163	2.14642	0.00680797	2.3271	0.00437062	chr4.66894445.66895439	2.08192	5.55809e-05	1.90449	1.08111e-08	chr13.42401460.42402236	2.36052	5.20501e-05	1.45932	0.000414941
chr14.56319092.56319587	3.01725	0.000548052	2.73066	0.00200445	chr4.68381790.68382821	1.5682	0.00590774	1.843	7.04011e-06	chr13.43215108.43215594	1.91921	0.00534489	1.49753	0.00740487
chr14.57474720.57475673	2.46218	0.000735389	1.73122	0.0081846	chr4.68479039.68479771	2.87749	9.92682e-05	1.80548	0.00180075	chr13.43253561.43254097	2.59994	0.000121092	1.51135	0.00356216
chr14.57493836.57494231	2.69378	0.00035869	2.73947	0.000325677	chr4.68598137.68599363	1.70726	0.00587683	1.86031	0.000125308	chr13.43510198.43511098	1.71037	0.00847245	1.9655	0.00026481
chr14.57516934.57517661	2.24978	7.97927e-05	2.59201	4.8715e-06	chr4.70663955.70664775	2.38047	0.00337737	1.94705	0.00501693	chr13.43653149.43653895	3.27141	1.12934e-05	2.60899	7.58456e-06
chr14.58323147.58323841	1.85508	0.00742453	2.01814	0.00341918	chr4.71668055.71668933	2.45941	0.000551977	1.90103	0.001403	chr13.43784502.43786179	1.65495	0.000335113	1.02505	0.0003763
chr14.59513622.59514656	2.16465	9.45822e-05	3.6609	4.56165e-10	chr4.71711795.71712599	2.70046	9.46077e-06	2.11162	3.09764e-06	chr13.43908891.43909797	2.91587	5.75901e-05	1.68876	0.00324434
chr14.60196722.60197594	2.42901	0.000536277	1.83705	0.00614095	chr4.71951276.71951976	2.3028	0.00173172	2.21229	0.000306752	chr13.43919155.43920083	2.34569	0.000790021	1.99896	0.000755445
chr14.61090839.61091591	2.75029	1.52284e-05	3.55767	2.95314e-07	chr4.72136512.72137242	2.77034	1.14445e-06	2.33393	6.63703e-09	chr13.43959429.43960203	2.72769	0.000212695	1.96999	0.000374326
chr14.61367162.61367700	2.91979	4.35301e-05	1.93215	0.00711438	chr4.72443866.72444931	2.64961	9.6831e-06	2.07547	4.15074e-06	chr13.44312022.44312948	2.51889	3.77514e-05	1.68899	0.000180502
chr14.61885253.61886051	2.63947	0.000981251	2.96129	0.000581539	chr4.72687223.72688222	1.67423	0.00831415	1.92347	0.000185667	chr13.44344487.44345735	2.86559	1.00215e-06	1.22008	0.00188877
chr14.61960400.61961139	2.05209	0.00481832	2.58921	0.000617117	chr4.73469275.73470063	2.04318	0.00536722	1.58738	0.0081788	chr13.44622585.44623572	3.38209	1.63026e-07	1.05481	0.00390212
chr14.62164636.62165298	2.52937	0.00062556	2.14449	0.00397816	chr4.74114430.74115376	2.19871	0.000453779	1.28911	0.00336863	chr13.45017968.45019214	2.22125	6.026e-05	1.26872	0.00107674
chr14.62800707.62801206	2.17896	0.00600522	2.52241	0.00233251	chr4.75035870.75036763	1.88898	0.00423727	2.9311	2.38557e-08	chr13.45261683.45262320	2.80799	0.000568767	1.94869	0.00273911
chr14.63582263.63582495	2.67733	0.00198765	3.09722	0.00117986	chr4.75263503.75264048	2.03987	0.0037973	2.09881	0.000423294	chr13.45493448.45494491	1.85781	0.000163886	1.14892	0.000434867
chr14.64492800.64493604	2.91791	8.65777e-05	3.72283	1.19402e-05	chr4.77259178.77260340	1.73012	0.00118081	1.35118	7.16696e-06	chr13.45600232.45601080	3.02271	5.2892e-06	1.32507	0.0067117
chr14.64531219.64531978	2.15608	0.00956249	2.4431	0.00377515	chr4.78222025.78223157	2.06861	0.00256998	2.09076	0.000275348	chr13.45620107.45621496	2.33088	8.35263e-06	1.45401	7.47652e-05
chr14.65025381.65025886	2.32489	0.00310052	2.94873	0.000400755	chr4.79309703.79310687	1.73912	0.00433395	2.88083	2.09834e-08	chr13.45698372.45699114	2.77948	3.65301e-06	2.07823	3.59815e-06
chr14.65081803.65082375	2.09578	0.00315041	1.9567	0.0051157	chr4.81827382.81827823	2.42643	0.00303734	2.33924	0.000890821	chr13.45948940.45949594	2.67986	0.000229456	1.60972	0.00560373
chr14.65285433.65285988	2.88813	0.000218051	2.09221	0.00702013	chr4.81836949.81837696	2.54031	0.000337916	2.46225	2.85746e-05	chr13.46187924.46189013	3.04649	2.63507e-05	1.87258	0.000468769
chr14.65321872.65322614	2.23262	0.00194592	2.81663	0.000353261	chr4.82324995.82325723	1.65707	0.00831295	2.00889	7.48499e-05	chr13.47999284.47999942	2.29421	0.0026371	2.53263	0.000117924
chr14.66229731.66230323	2.76613	4.74582e-05	2.88125	5.39005e-05	chr4.83354810.83355855	1.86619	0.00354078	1.7509	0.000334964	chr13.48031304.48032066	2.94776	9.69048e-05	1.55409	0.00730241
chr14.66362653.66363545	1.84782	0.00114945	2.3468	3.74329e-05	chr4.84001462.84002533	2.32784	0.000100088	1.51307	0.000464323	chr13.48042641.48043231	2.91404	0.000282967	2.67409	5.85755e-05
chr14.66387579.66388155	3.56331	6.13093e-06	3.22393	4.56213e-05	chr4.84027393.84028625	1.85766	0.00219452	1.70736	0.000186995	chr13.48086305.48087497	2.26847	3.30949e-05	1.01552	0.00793785
chr14.66472625.66473408	2.40402	0.00113112	2.29644	0.00175457	chr4.84400988.84402279	2.82923	4.07145e-06	1.28135	0.00226176	chr13.48145748.48146470	3.37694	6.49978e-07	2.17998	1.48228e-05
chr14.66478758.66479678	1.85651	0.00991626	1.84465	0.00670439	chr4.84741135.84742299	1.90975	0.00117199	1.50198	0.000465119	chr13.48167771.48168666	3.32994	4.75709e-07	2.97109	7.8882e-09
chr14.66558372.66559069	2.74314	4.40573e-05	2.65669	7.96597e-05	chr4.85101461.85102032	2.24465	0.00303176	1.6107	0.00938123	chr13.48349506.48350447	3.17687	3.63182e-06	1.6071	0.0011717
chr14.67434555.67435698	2.60783	0.000415619	2.48551	0.000327508	chr4.85824323.85825205	2.03165	0.00507602	1.64624	0.00559016	chr13.49019904.49020507	2.46219	8.79579e-05	1.18024	0.00986541
chr14.68213723.68214331	3.02344	0.000251291	2.15956	0.00571702	chr4.86109834.86110560	3.10683	4.11477e-06	2.37986	6.78375e-06	chr13.49400060.49400782	2.12599	0.000386011	1.78697	0.000190455
chr14.68223787.68224595	3.20131	4.85783e-06	2.31728	0.000167179	chr4.86269818.86270956	2.12676	0.000247409	1.56765	0.000160148	chr13.49490580.49491218	2.2881	0.00398374	2.32155	0.000371226
chr14.68308015.68308762	2.19443	0.00421653	2.11859	0.00579694	chr4.86416264.86417238	1.54448	0.00764079	1.42188	0.000102097	chr13.51770342.51770878	2.25459	0.00167237	1.95741	0.00101109
chr14.68339596.68340103	2.87901	0.000996612	2.34754	0.00296794	chr4.86964315.86965347	1.91143	0.00187499	1.84434	9.8121e-05	chr13.51805613.51806996	2.67565	1.21426e-06	1.39506	1.49388e-05
chr14.68381704.68382838	3.00044	6.24621e-07	1.59898	0.00602977	chr4.87658219.87659246	2.21875	0.000723921	1.64669	0.00130427	chr13.52128542.52129248	1.93113	0.00511604	2.09853	0.000389961
chr14.69085701.69086035	3.1743	0.000879268	2.52419	0.00806595	chr4.89940681.89942060	1.68586	0.00190942	2.19318	3.61687e-08	chr13.52139065.52140796	2.02699	5.02843e-05	1.16545	0.000461596
chr14.69985103.69986221	1.74567	0.00957342	2.03917	0.00332587	chr4.90070833.90071524	2.32127	0.00283294	1.73674	0.00742389	chr13.52267916.52268752	2.3519	0.000100136	2.61867	1.30756e-07
chr14.70999953.71001331	1.60033	0.00956249	1.80538	0.00179808	chr4.90917093.90918078	2.05124	0.00359124	2.14087	0.000250462	chr13.52323521.52324237	2.558	0.000291047	1.73548	0.00206312
chr14.71103940.71104481	1.89162	0.00569799	2.15592	0.00186037	chr4.92385620.92386096	3.51144	0.000238894	2.01863	0.0085593	chr13.52546565.52547278	2.86038	0.000175672	1.54873	0.00979093
chr14.71329891.71330998	1.91968	0.000513664	2.88063	4.20857e-07	chr4.93656777.93657542	1.91774	0.00586584	2.18919	5.90181e-05	chr13.52812451.52813391	1.63566	0.00838229	1.8359	0.000587999
chr14.71544282.71545394	1.54991	0.00930385	2.5891	8.6485e-06	chr4.93678517.93679021	2.58447	0.00192226	1.96593	0.00441885	chr13.52905316.52905724	2.65912	0.000198788	1.87624	0.00098129
chr14.71972275.71973691	1.58537	0.00341271	2.63939	6.93146e-07	chr4.93740094.93741045	2.35352	0.000956008	1.67086	0.0024341	chr13.53003274.53003594	2.47312	0.00329067	2.07316	0.00318424
chr14.72013756.72014701	2.34415	0.000802593	2.58003	0.000142393	chr4.94752177.94753077	1.84859	0.00364673	1.268	0.00461296	chr13.53052023.53052694	2.50575	0.000515389	2.22466	0.000247057
chr14.73161835.73162811	3.08681	8.88588e-06	2.83079	3.66434e-05	chr4.95289706.95291106	2.66281	4.2096e-06	1.85068	6.75804e-06	chr13.53079478.53080098	2.92084	4.14444e-06	2.66571	3.63998e-07
chr14.73198943.73199719	3.05013	1.94205e-06	2.74791	3.28244e-06	chr4.95346627.95347658	2.49908	1.97321e-06	1.49919	5.74362e-07	chr13.53353244.53354033	2.63512	3.73675e-05	1.52646	0.00142867
chr14.73255398.73255947	2.02229	0.00659611	2.0976	0.00637737	chr4.95900025.95900387	2.37346	0.000507817	2.5223	8.42497e-06	chr13.53521476.53521941	1.73553	0.00652281	1.64888	0.00129063
chr14.73669804.73670606	1.77202	0.00459909	3.04898	6.79237e-06	chr4.96593036.96593519	2.80749	2.00583e-05	2.6216	1.20473e-06	chr13.53524790.53525418	4.04442	4.08446e-09	3.08349	2.86947e-08
chr14.73709187.73710331	2.02003	0.00335149	2.43008	0.000451039	chr4.96697500.96698388	1.8139	0.00164363	2.19492	8.2495e-08	chr13.53697863.53698728	4.75442	3.88175e-13	1.62411	7.16631e-06
chr14.73997743.73998660	2.11277	0.00104746	2.45612	8.31215e-05	chr4.97101046.97102151	2.03505	0.000782402	1.70864	8.19183e-05	chr13.53764511.53765371	1.55945	0.00402676	1.0342	0.00643986
chr14.74252603.74253461	1.95141	0.0017025	2.66659	3.8723e-05	chr4.97836738.97837319	2.04962	0.0027335	1.41188	0.00909939	chr13.54118356.54118683	3.55586	0.00010286	1.98338	0.00425204
chr14.75020622.75021384	2.13401	0.000907501	2.09063	0.000982465	chr4.99388363.99389108	2.48464	0.00045646	2.2695	0.000121677	chr13.54168651.54169460	2.56141	3.10422e-06	1.31551	0.000632125
chr14.75164241.75164737	2.25106	0.00301971	2.12575	0.00526739	chr4.100173216.100173889	3.04652	5.989e-06	2.03997	5.85927e-05	chr13.54341316.54342361	3.58033	7.05888e-09	2.31879	7.22413e-10
chr14.75279791.75280055	2.73386	0.00222598	2.93223	0.00180432	chr4.100660858.100661900	1.64543	0.00237654	1.65822	7.02935e-06	chr13.54403146.54404018	2.17852	0.00123852	1.73626	0.00159623
chr14.75690262.75691118	2.50072	0.000757086	3.31538	1.34787e-05	chr4.102073045.102073923	2.23478	0.00220905	2.30338	0.00032113	chr13.54944350.54944794	3.0639	4.04806e-05	1.62133	0.0037354
chr14.77744589.77745401	2.57269	0.000705427	3.00293	0.000103513	chr4.104019922.104020506	2.02605	0.00805341	2.13698	0.00126731	chr13.55912249.55912690	3.24862	0.000482549	1.87192	0.00835126
chr14.78065781.78066707	1.77899	0.00911336	1.89622	0.00419293	chr4.104053311.104054184	3.28178	1.21162e-06	1.12984	0.0084039	chr13.56418704.56419479	1.87585	0.00689205	2.41934	3.24372e-05
chr14.78273637.78274686	1.86353	0.00189627	1.59229	0.00646192	chr4.104501023.104501819	2.28024	0.000137443	1.42845	0.00069388	chr13.56633678.56634530	2.35574	0.00169359	2.66617	1.79425e-05
chr14.78368529.78369321	1.8162	0.00190342	3.07257	1.8408e-07	chr4.104686984.104687526	1.83788	0.00448691	1.50397	0.00245994	chr13.56752883.56754186	1.36324	0.00612757	1.06815	0.00187911
chr14.78470611.78471200	2.19788	0.0049273	2.47553	0.00414917	chr4.105265373.105266402	2.7154	2.08352e-05	1.45841	0.00174275	chr13.56870663.56871514	2.76657	3.74303e-05	2.08244	0.000103251
chr14.78747125.78747898	2.24072	0.00119545	2.81737	8.14615e-05	chr4.105972012.105972922	1.88201	0.00539184	1.42346	0.00810378	chr13.56882436.56883337	2.02361	0.00015518	1.9581	6.92619e-07
chr14.79313755.79314612	2.41974	0.000967199	1.86628	0.00402761	chr4.106281262.106282107	2.06483	0.00090637	1.57032	0.001012	chr13.57097463.57098037	3.95586	2.21878e-06	2.05123	0.000467017
chr14.79606728.79607702	1.70689	0.00916165	2.02751	0.00139748	chr4.106643429.106644609	1.95375	0.000887263	2.63194	1.55207e-08	chr13.57151303.57151984	2.63244	0.00114312	2.00496	0.000723768
chr14.79652540.79653675	2.28797	0.000449129	1.80346	0.0036516	chr4.114572974.114573515	2.44696	0.0060196	2.42351	0.00144599	chr13.57262702.57263376	2.83675	0.00020244	2.44553	5.90244e-05
chr14.80051406.80052137	2.05654	0.00429339	2.12015	0.00357912	chr4.117004634.117005377	2.36173	0.0025583	2.29249	0.00056037	chr13.57814014.57814551	2.24457	0.0018395	2.32455	0.000208273
chr14.80237101.80238144	1.88569	0.00608365	2.98821	5.8362e-05	chr4.120248521.120249410	2.18026	0.000369355	1.14973	0.00919619	chr13.58786025.58786405	2.80177	0.000288136	1.94954	0.00152243
chr14.80249779.80250321	1.75731	0.004884	2.65612	4.36894e-05	chr4.126551006.126551525	3.10481	0.000415619	2.05581	0.00421574	chr13.60122645.60123523	3.37484	2.54088e-05	1.81327	0.00121579
chr14.81287317.81288109	1.85511	0.00590709	2.7413	0.000169467	chr4.128491969.128492612	1.79852	0.00246447	1.92959	2.03566e-05	chr13.60556928.60557922	2.74843	2.20809e-05	2.59236	1.13948e-07
chr14.82244749.82245271	2.26514	0.00304855	2.28327	0.00352274	chr4.128813452.128814014	3.0773	0.000959845	2.10293	0.00578374	chr13.63918121.63919642	1.6835	0.00237685	1.22705	0.00274113
chr14.82610310.82611193	2.2237	0.00190344	2.26413	0.00191135	chr4.130557762.130558433	2.17274	0.00181826	1.5937	0.00173384	chr13.64258021.64258789	2.68407	0.000211253	2.0344	0.000486235
chr14.82898343.82899340	2.63586	0.000401784	3.01378	0.000176587	chr4.132743820.132744896	1.70575	0.00842908	1.35797	0.00556981	chr13.68710736.68711566	2.2774	0.00113064	2.34926	5.90168e-05
chr14.83586247.83587487	1.53296	0.00496515	2.30234	1.55257e-06	chr4.132983800.132984565	1.8138	0.00776011	1.73336	0.0022149	chr13.68723924.68724484	4.63828	9.93543e-09	3.16566	2.77827e-08
chr14.83639694.83640482	2.11217	0.00305281	2.31041	0.000785909	chr4.136934938.136935534	2.25371	0.00344831	2.12881	0.00099973	chr13.68736772.68737412	2.35403	0.00216817	2.677	1.55693e-05
chr14.84041694.84042219	2.26314	0.00763713	3.11118	0.00124651	chr4.140456530.140456960	2.2026	0.00406204	1.78861	0.00750446	chr13.69027299.69028133	2.03474	0.00488685	1.33572	0.00906727
chr14.85915668.85916480	2.20665	0.00186257	2.34913	0.00143279	chr4.153063968.153064786	1.91312	0.00329148	1.46918	0.00434307	chr13.70149297.70150449	2.10827	0.00114669	1.85857	0.000314807
chr14.86170863.86171543	2.0888	0.00279722	2.04297	0.00275791	chr4.154827162.154827646	2.50318	0.00241879	1.85665	0.0053282	chr13.70513034.70513719	2.24761	0.00216556	2.58083	8.93825e-05
chr14.86660258.86661155	2.31147	0.000330621	2.65922	4.43955e-05	chr5.3909077.3909659	3.23163	0.000309046	2.30887	0.00194765	chr13.71767770.71768812	2.31333	1.92864e-05	1.0357	0.0059828
chr14.86772951.86773787	2.02957	0.00572332	2.31199	0.00154628	chr5.4612281.4612926	2.34448	0.00769122	2.64604	0.000713053	chr13.72224130.72225139	2.51766	7.80055e-05	1.95136	0.000111545
chr14.87582353.87583111	1.85466	0.00472171	2.58164	0.000136837	chr5.4685472.4686177	2.87288	9.41507e-05	2.46307	5.54782e-05	chr13.72554911.72555700	3.49879	5.34647e-08	2.30465	3.59033e-06
chr14.87878332.87879158	2.1151	0.00435431	1.92152	0.00857253	chr5.4811254.4812757	2.08763	0.000470518	1.16171	0.00725923	chr13.72873685.72874119	2.16662	0.00776813	2.02962	0.00378482
chr14.88056968.88057462	2.26351	0.00504604	2.49604	0.00292042	chr5.6501633.6502744	1.96066	0.00189525	2.53527	1.04861e-06	chr13.72874252.72874927	2.01743	0.00483292	1.85498	0.00201196
chr14.89064615.89065809	2.17221	0.000300353	2.8319	2.57461e-06	chr5.9780868.9781617	3.72866	2.88855e-08	2.33387	7.33636e-07	chr13.73031144.73031629	2.42756	0.00251599	2.34487	0.000577821
chr14.89075694.89076866	1.82528	0.00135229	2.62945	4.28286e-06	chr5.9804481.9805304	2.48024	0.00081327	2.44584	8.25142e-05	chr13.73305828.73306800	1.77056	0.00696543	1.77317	0.000982069
chr14.89832176.89833449	2.69673	1.64637e-05	2.73176	1.73999e-05	chr5.10481834.10483227	2.7061	1.35433e-05	2.16897	4.05288e-06	chr13.73748323.73749234	1.66647	0.00487712	1.58765	0.000742432
chr14.90747474.90748256	2.44219	0.00118692	2.59642	0.000661718	chr5.13106974.13107893	2.72534	1.91388e-05	2.00332	2.99393e-05	chr13.73763266.73765207	1.67442	0.000465127	1.21639	0.00012257
chr14.90797356.90797973	2.44415	0.00050302	2.78395	0.000178388	chr5.15800257.15801535	2.38469	8.45994e-05	1.6835	0.000108983	chr13.74095508.74095848	3.01009	0.000213839	2.37118	0.000314421
chr14.90851392.90852758	2.22416	0.000193028	2.26665	0.000106334	chr5.16165942.16167594	2.13418	0.00062556	1.799	0.000157793	chr13.74107008.74108123	1.73536	0.00637401	1.96225	0.000224364
chr14.91658576.91659793	3.1636	9.0289e-08	2.61545	1.82368e-05	chr5.17499536.17500549	2.4945	1.34326e-05	1.56156	6.04766e-05	chr13.74731929.74732940	3.48943	1.05144e-09	2.57836	1.93512e-10
chr14.93072217.93073052	1.75877	0.00975029	2.03391	0.00277387	chr5.18267675.18268218	2.31339	0.000842159	2.20675	0.000128184	chr13.76523698.76524438	2.06316	0.00599175	2.17749	0.000709416
chr14.93374174.93374571	2.50334	0.00805341	2.61522	0.0075124	chr5.19802589.19803720	2.63641	0.000218667	1.48693	0.00784685	chr13.76916507.76917307	3.68649	8.08196e-10	2.91291	9.28555e-12
chr14.93816488.93816977	2.71649	0.000880039	2.94985	0.000509355	chr5.19937459.19937905	1.97017	0.00252694	2.98751	1.17199e-07	chr13.77063200.77064049	2.81874	2.75238e-05	1.92119	0.000196483
chr14.94959585.94960262	2.94599	0.000153041	2.74929	0.000570149	chr5.21012025.21012675	2.96131	2.56645e-05	1.82337	0.000501895	chr13.77069365.77070047	3.30165	4.05189e-07	1.68713	0.000196483
chr14.95913271.95913800	3.06458	7.84319e-05	2.69143	0.000598417	chr5.21783030.21783524	3.11992	9.07005e-06	2.93308	4.83762e-07	chr13.77416876.77417888	1.99481	0.00193024	1.64661	0.000530097
chr14.99059032.99059782	2.8443	2.7073e-05	2.57941	0.000168001	chr5.22113713.22114249	2.77303	0.000382499	2.26601	0.000485634	chr13.77872341.77873141	2.10237	0.00161002	1.83911	0.000787371
chr14.99376582.99377516	2.11001	0.000312875	1.87498	0.000988154	chr5.22234554.22235288	2.1045	0.00407664	1.54516	0.00626207	chr13.78860965.78861490	2.66836	0.00140267	1.77024	0.00958528
chr14.99381223.99382168	1.79644	0.00835646	2.10547	0.00216707	chr5.22376238.22377178	2.4551	0.000235121	1.97579	0.000403686	chr13.79142829.79143562	2.88362	1.5366e-06	1.75152	6.25099e-05
chr14.99733569.99734639	1.64467	0.00371201	2.80428	4.51945e-06	chr5.22572430.22572882	2.40454	0.00696326	2.38526	0.00251346	chr13.79220133.79221414	2.97929	8.88345e-07	2.49541	4.55894e-08
chr14.100359602.100360444	2.0287	0.0023231	1.88249	0.00589727	chr5.26232516.26232994	2.12181	0.00808454	2.12333	0.00183523	chr13.80652808.80653524	2.85924	2.34218e-05	2.47778	6.87249e-06
chr14.100488821.100489295	2.40872	0.00202254	2.59587	0.00186068	chr5.26459573.26460142	2.21187	0.0017616	1.96271	0.000782614	chr13.81703821.81704889	2.32094	4.35387e-05	1.1896	0.00135186
chr14.100875651.100876411	2.45373	0.000231435	2.02728	0.00169343	chr5.26950443.26951619	2.00408	0.00148272	1.72179	0.000410176	chr13.82088532.82089144	1.40772	0.00805802	3.36673	3.50939e-15
chr14.100970614.100971377	2.10843	0.00534292	2.07348	0.00669498	chr5.27184915.27185352	2.07733	0.00893425	2.35207	0.00058869	chr13.84021521.84022437	1.84356	0.00220649	1.6261	0.000800268
chr14.101210020.101210519	2.30747	0.00536981	2.94462	0.000960313	chr5.27373383.27374352	1.67076	0.00493658	1.66813	0.000153545	chr13.85098219.85098643	3.28709	4.57427e-05	2.79866	1.58052e-05
chr14.101797885.101798394	1.96967	0.00631189	2.80067	0.00027977	chr5.28187498.28187991	2.2664	0.00627426	2.48416	0.000795307	chr13.85897431.85898342	4.22799	1.99338e-12	2.61238	1.31776e-11
chr14.101838266.101838598	2.11168	0.00462355	2.95825	0.000286629	chr5.28734453.28735592	2.20207	0.000456393	1.67235	0.000210431	chr13.85993012.85993800	2.87277	5.05651e-06	1.67835	0.000323612
chr14.101930657.101931734	1.58091	0.00685064	2.32499	0.000104767	chr5.28756023.28757048	2.02891	0.000631707	1.70612	0.000105568	chr13.85996113.85996429	3.15847	0.000219184	2.83791	7.96563e-05
chr14.102105988.102106785	2.24378	0.00567945	2.31631	0.00470593	chr5.30473855.30474381	3.0091	0.00023219	2.34466	0.000127291	chr13.87728489.87729174	3.17722	5.7666e-05	2.13512	0.000716639
chr14.102594695.102595510	1.67743	0.00307477	3.21779	6.61514e-08	chr5.31674430.31675279	2.29674	0.0023231	1.66195	0.00683281	chr13.88661445.88662095	1.90743	0.000353261	1.08044	0.00404663
chr14.102688190.102688640	2.29748	0.0056147	2.6035	0.00277311	chr5.32115331.32115873	2.3745	0.00288187	2.45178	0.000502572	chr13.89340356.89340971	3.36148	5.90266e-07	1.34537	0.00368577
chr14.103109572.103110550	2.27289	0.000186181	1.53776	0.00889162	chr5.32403328.32404041	2.17848	0.000826471	2.53393	3.33722e-06	chr13.89814465.89815177	3.32509	4.13619e-06	2.03813	2.43194e-05
chr14.103150145.103150639	2.81085	5.26994e-05	3.29073	5.42232e-06	chr5.34970097.34970898	2.76924	0.000253511	2.46802	0.000143133	chr13.89962828.89963616	2.68785	7.08246e-05	2.02397	0.000198668
chr14.103155390.103156181	1.69043	0.00867554	2.24407	0.00063995	chr5.34978996.34979658	2.73761	0.000202422	2.26305	0.000105696	chr13.91118222.91119155	2.11032	0.000334034	2.17017	4.73604e-06
chr14.103162555.103163371	1.69287	0.00468206	2.08408	0.000397709	chr5.35165901.35166827	2.82045	6.3386e-05	1.50346	0.0052114	chr13.91130411.91131057	2.83698	1.9102e-05	1.51317	0.00206193
chr14.103402882.103403813	1.65587	0.00429891	1.47963	0.00728649	chr5.35334481.35335050	2.85463	2.24646e-05	1.89002	0.000254447	chr13.91295282.91297114	1.94202	0.000183283	1.13137	4.48176e-05
chr14.103427749.103428294	2.23327	0.000729437	2.6528	9.51263e-05	chr5.35458044.35458749	2.3955	0.00132483	1.66946	0.00607557	chr13.91526129.91526825	2.26304	0.00120854	2.15574	0.000273228
chr14.103629797.103630874	2.17239	0.000705999	2.4228	0.000166422	chr5.35737129.35737743	2.7733	0.000630505	1.87016	0.00367075	chr13.91693252.91694032	1.63179	0.00219413	2.22095	7.6331e-08
chr14.103689589.103690335	1.99231	0.0016346	2.05315	0.00106632	chr5.36254706.36255472	2.35373	0.000280893	2.4559	8.94242e-06	chr13.91823296.91824268	2.82279	1.69407e-08	2.13103	1.45e-10
chr14.105497803.105499157	2.06603	0.000205918	2.22503	5.99295e-05	chr5.36417501.36418010	3.15866	2.01837e-05	2.60238	1.53399e-05	chr13.91858900.91860424	2.35007	0.000151754	1.84041	0.000127368
chr14.105658076.105658736	1.94064	0.00676997	2.22295	0.00212027	chr5.39453282.39454082	2.46197	0.000480004	2.48673	2.36905e-05	chr13.91896265.91896992	1.98659	0.00301775	2.06686	0.000413086
chr14.105720736.105721970	2.05108	0.000280005	2.9211	4.42182e-07	chr5.40294964.40295719	1.96258	0.00521548	1.46842	0.00961758	chr13.92185771.92186838	3.66581	2.54411e-09	2.08142	5.56785e-07
chr14.105999493.106000257	1.85151	0.00277915	2.24507	0.000209635	chr5.40401101.40401688	2.54278	0.000688629	1.88127	0.00214782	chr13.92587407.92588006	2.76915	0.000108705	1.62008	0.00419402
chr14.106011551.106012596	1.9494	0.000162348	2.40661	2.03782e-06	chr5.41413953.41414716	2.15145	0.00273944	2.15665	0.000347023	chr13.94423469.94424243	4.43665	4.02578e-11	1.42121	0.000320902
chr14.106506504.106507518	1.88141	0.000604369	2.16795	4.1901e-05	chr5.41966766.41967616	1.82241	0.00372997	3.14827	1.43667e-09	chr13.94479831.94480995	3.13012	2.02204e-06	1.47247	0.00142523
chr14.107525706.107526729	1.98197	0.00794568	2.28442	0.0016151	chr5.43433141.43433872	2.05507	0.00538891	1.83283	0.00456888	chr13.95365986.95367039	2.48896	1.96637e-05	2.48764	3.45323e-07
chr14.107570666.107571365	2.151	0.004319	1.99711	0.00788365	chr5.43698899.43699976	2.46805	1.41613e-05	1.3972	0.000285045	chr13.95751074.95751677	3.91752	5.0039e-07	3.08524	5.01733e-07
chr14.107687135.107688292	2.40135	0.000101737	2.76367	4.36388e-06	chr5.45164599.45165564	2.18281	0.00304072	1.68927	0.00498635	chr13.95776907.95777890	1.91722	6.53799e-05	1.4851	2.39702e-06
chr14.108033840.108034693	2.37822	0.000694692	1.87409	0.00512556	chr5.45538650.45539486	1.8259	0.0080323	1.53891	0.006425	chr13.96461837.96462869	3.45077	2.90058e-07	2.54549	3.92236e-07
chr14.108247315.108247919	2.11605	0.000228808	3.72299	7.23793e-09	chr5.45543013.45543780	2.5904	0.000247518	1.89288	0.000930865	chr13.96506390.96506966	2.97099	0.000336017	1.89192	0.00391855
chr14.108609689.108610514	2.29517	0.000393605	2.892	1.7618e-05	chr5.45589944.45590706	1.74451	0.0029065	2.68752	1.72335e-08	chr13.96953224.96953875	2.18561	0.00370464	1.88912	0.00327454
chr14.110401879.110402323	2.67556	0.000379138	3.00765	9.61539e-05	chr5.45627535.45628440	2.54356	4.20495e-06	1.27557	0.000276164	chr13.96990507.96991205	1.91477	0.00638744	1.96603	0.00084361
chr14.111096171.111096671	2.32375	0.00148103	2.8564	0.000116428	chr5.45629310.45629967	1.94153	0.00272414	1.94424	0.000266015	chr13.97212485.97212787	3.57308	1.87883e-05	2.33416	0.000217653
chr14.111298231.111299013	1.86901	0.00900462	2.94864	0.000126718	chr5.45788890.45789909	2.50156	3.15477e-05	2.05294	4.15074e-06	chr13.97214284.97215048	3.46606	2.66958e-10	2.2233	4.9805e-10
chr14.111330461.111331078	2.65314	3.8709e-05	2.74143	3.33108e-05	chr5.45829132.45829915	3.00311	3.05806e-05	2.28345	5.0437e-05	chr13.97376569.97377257	3.08174	2.66224e-05	1.57389	0.00364657
chr14.111507819.111508344	3.05398	1.17006e-05	2.94035	2.8635e-05	chr5.47824374.47825280	2.68439	0.000205299	2.03127	0.000433291	chr13.97409396.97410574	3.76835	1.15329e-11	1.0054	0.00300568
chr14.111581329.111581992	2.09704	0.0011894	2.13959	0.000893639	chr5.48425045.48426008	2.78161	2.5778e-05	1.40593	0.0045188	chr13.97435335.97435825	2.81299	0.000278673	1.98834	0.00126106
chr14.111762100.111762727	2.31762	0.00735469	2.50707	0.00443983	chr5.49231126.49231705	3.10201	5.77303e-05	2.53608	5.30617e-05	chr13.97438753.97439516	1.861	0.000615218	1.41084	0.000378157
chr14.111883665.111884597	2.10769	0.00407245	3.3812	4.97637e-05	chr5.49347473.49347911	3.11882	8.70953e-05	2.37855	0.000269605	chr13.97576842.97577746	3.40782	7.31601e-07	2.049	5.45655e-05
chr14.112230152.112230953	3.13895	2.10636e-06	2.97711	3.5671e-06	chr5.50783671.50784216	2.77993	0.00090361	1.97336	0.00501091	chr13.97886505.97887121	2.82339	8.6485e-06	1.76768	0.00027196
chr14.112239469.112240006	2.39297	0.00126524	3.05795	8.44172e-05	chr5.51227747.51228762	2.90349	3.66004e-07	1.99143	2.97802e-07	chr13.97976687.97977786	2.18716	0.000388244	2.08296	2.4961e-05
chr14.112464920.112465640	2.20919	0.00146105	2.15711	0.00155093	chr5.51685285.51685938	2.72458	0.000110126	2.08253	6.65112e-05	chr13.98985445.98986117	1.97199	0.00993694	1.9141	0.00216322
chr14.112466351.112466834	1.92689	0.00863332	2.4472	0.00177881	chr5.52456895.52457552	1.86866	0.00579471	1.74143	0.00117434	chr13.99022009.99022562	3.15287	4.50612e-05	2.61947	2.33392e-05
chr14.113215712.113216126	2.59621	0.00347338	2.53291	0.00571877	chr5.52459611.52460264	2.67728	1.11449e-05	2.14648	1.66588e-06	chr13.99118789.99119808	3.39931	7.09576e-09	1.82558	4.48541e-06
chr14.113469027.113470624	1.77566	0.00313731	2.66631	1.91672e-05	chr5.53650015.53650622	2.07545	0.00660334	1.91479	0.00320581	chr13.99368747.99369597	1.65578	0.00653909	1.4128	0.00301771
chr14.114001983.114002982	2.07692	0.00103912	3.57036	2.28144e-07	chr5.53686137.53686964	2.32264	0.000808099	1.51636	0.00603565	chr13.99593828.99595092	2.03651	0.000115537	1.04959	0.00286148
chr14.114223348.114224153	2.753	0.000182883	2.47293	0.000394943	chr5.54268358.54268729	3.26674	0.000263377	2.66647	0.000453452	chr13.100343737.100344192	3.45122	0.000236561	2.20279	0.00421316
chr14.114300563.114301091	2.77357	4.98024e-05	3.08343	1.29343e-05	chr5.54270777.54271499	3.20386	2.02104e-07	2.69843	3.36468e-09	chr13.100559267.100560108	4.09482	8.177e-15	2.97547	9.29783e-18
chr14.114547778.114548858	1.50174	0.00735469	2.11851	9.6827e-05	chr5.54677895.54678825	2.92696	0.000100088	1.85537	0.00140261	chr13.100570307.100571273	2.31195	0.000871444	2.34766	4.8405e-05
chr14.115173678.115174421	2.25174	0.00167898	1.96948	0.00258157	chr5.54927479.54928247	2.71508	0.000113068	2.28744	6.29495e-05	chr13.102035783.102036597	2.3841	5.85441e-05	2.40282	6.19603e-07
chr14.115636200.115636552	2.66462	0.00174905	2.58711	0.00159139	chr5.55127805.55128696	1.86583	0.000902474	3.73102	8.31886e-16	chr13.102104380.102104887	2.37426	0.0024837	1.80088	0.00407279
chr14.116550635.116551680	1.67095	0.00796811	2.38473	0.000190286	chr5.57474635.57475467	2.61558	9.02189e-05	2.0083	0.000127132	chr13.102589404.102590690	2.23702	0.000206986	1.30136	0.00205093
chr14.116779443.116780077	2.86062	5.08286e-05	3.07778	3.52951e-05	chr5.57802975.57803836	1.89419	0.00249923	2.17983	7.17105e-06	chr13.102813852.102814536	2.17939	0.00201547	1.9835	0.000494244
chr14.117106732.117107629	2.19154	0.000782591	2.79296	1.58805e-05	chr5.60516211.60516870	3.35175	9.83684e-06	2.60781	1.40966e-05	chr13.102918325.102919193	3.02837	1.28391e-08	2.76604	5.0046e-12
chr14.117226935.117227653	2.03549	0.00272727	2.68802	0.000194414	chr5.61354914.61355872	1.99491	0.00650948	1.80926	0.0028695	chr13.102925886.102926535	1.99632	0.000958823	1.67477	0.000417699
chr14.117768591.117769160	2.32528	0.00109041	2.94049	9.419e-05	chr5.61413608.61414498	2.35115	0.00186442	2.58379	6.23276e-05	chr13.103081307.103081695	2.29184	0.00563832	1.78855	0.0095807
chr14.117923547.117924261	1.74004	0.00594632	1.82114	0.00402429	chr5.63617013.63617726	2.0275	0.00213663	1.84458	0.00056967	chr13.103432402.103433365	2.16158	0.000553536	1.73725	0.000345159
chr14.117958246.117959466	2.32028	2.36885e-06	3.72254	2.67174e-13	chr5.63686488.63686969	2.69401	0.000923984	1.91973	0.00541123	chr13.103544539.103545354	2.62817	9.62252e-05	2.08012	0.000312538
chr14.117981388.117982195	1.66313	0.00575918	2.93124	2.81893e-05	chr5.64517861.64518236	2.75586	0.00101469	2.32283	0.00128869	chr13.103600681.103602044	3.7489	4.01645e-11	3.21761	2.35858e-14
chr14.118320071.118320584	2.42745	0.000961878	2.68876	0.000339861	chr5.67546682.67547064	3.27409	0.000510604	2.07715	0.00695881	chr13.104117222.104117624	1.76166	0.005645	1.62345	0.00127316
chr14.118321006.118321465	2.42034	0.000277895	2.74762	6.46477e-05	chr5.68146582.68147536	2.72224	9.72872e-05	2.86865	4.84645e-07	chr13.104119065.104119776	1.98385	0.000525324	1.22992	0.00309127
chr14.119798499.119799269	1.87882	0.00189873	2.30042	0.000125023	chr5.68209635.68210602	2.78197	0.000127763	2.36003	9.30657e-05	chr13.104362747.104363046	2.84411	0.00160113	2.06707	0.00498214
chr14.120150994.120151477	1.80439	0.00643703	2.81185	1.99962e-05	chr5.68615503.68616055	3.92004	8.11103e-08	1.84377	0.000186741	chr13.104492328.104493350	2.22396	3.03868e-05	1.49258	7.64855e-05
chr14.120170609.120171351	2.68324	0.000382487	2.33932	0.00120854	chr5.68845388.68846424	2.21881	0.000663427	2.04938	0.000125308	chr13.104563801.104564444	2.2558	0.000359355	2.24953	6.37907e-06
chr14.120578447.120579282	2.29357	0.00142867	2.45714	0.00078658	chr5.69506969.69507767	2.38837	0.00198174	1.75518	0.00734358	chr13.104774132.104774640	2.63094	0.00129049	2.28783	0.000880653
chr14.120848940.120849481	1.92236	0.00640812	2.4641	0.00110997	chr5.70402172.70402959	1.89647	0.00189627	1.44462	0.00185302	chr13.105173335.105173886	3.19041	3.40666e-06	1.86975	0.000101758
chr14.120855058.120855680	2.06574	0.00795626	2.41898	0.00387388	chr5.71119252.71120030	2.95029	7.62755e-05	1.84459	0.00161328	chr13.106222625.106223195	3.07205	2.4029e-05	2.0647	0.000225562
chr14.121015062.121015757	2.2576	0.000904307	3.08118	2.36e-05	chr5.71299378.71300554	2.19286	0.00137301	1.85189	0.000690323	chr13.107661383.107661759	2.39019	0.000333811	1.5945	0.0032394
chr14.121254776.121255333	2.13986	0.0092473	2.2555	0.00593687	chr5.71341104.71342259	2.05811	0.000590733	1.99029	1.30388e-05	chr13.107663382.107664661	3.55589	1.71808e-13	1.66413	8.78597e-09
chr14.121613418.121613893	2.15955	0.000981251	2.39493	0.000293226	chr5.72938333.72939003	1.93093	0.00899643	2.57876	0.000115159	chr13.107961746.107962490	3.23983	1.22644e-05	1.54308	0.00553064
chr14.121636907.121637427	2.32295	0.00335321	2.93435	0.000562428	chr5.73125520.73126260	2.28359	0.00126444	1.78068	0.00325395	chr13.108131761.108132820	2.25494	7.75012e-05	1.81423	1.03151e-05
chr14.122754181.122754894	2.01388	0.00436153	2.57328	0.000274458	chr5.73691158.73691563	2.99861	0.000807879	2.09261	0.00513712	chr13.108354585.108355425	3.24437	4.26098e-07	2.44077	2.31697e-07
chr14.123209517.123210054	2.48656	0.00975763	2.64916	0.0068622	chr5.73775612.73776262	2.44199	0.00130936	2.12569	0.000938039	chr13.108546328.108546753	3.45016	1.10936e-05	1.8641	0.00156215
chr15.6088559.6088900	3.57008	0.000171461	3.57423	0.000422117	chr5.74281443.74281905	2.23663	0.00530365	2.05631	0.00297658	chr13.109066165.109067039	2.0525	0.00186692	1.79899	0.000370476
chr15.6411208.6411843	1.92198	0.00748446	2.58839	0.000581004	chr5.74956199.74956848	2.27606	0.000643587	1.79413	0.000695646	chr13.109211422.109212499	2.01256	0.000295329	1.15576	0.00418644
chr15.6997642.6998367	2.39383	0.000763474	3.42604	1.51203e-05	chr5.75449891.75450644	1.75878	0.00680039	2.75923	8.38682e-10	chr13.109313533.109314405	3.84828	2.72615e-07	1.82469	0.000374326
chr15.8030628.8031411	1.97479	0.0020688	2.17864	0.000634636	chr5.75512382.75513412	1.85269	0.00143781	2.19711	1.39915e-07	chr13.109633845.109634641	2.79081	4.40496e-05	2.62876	1.34832e-06
chr15.8416498.8417332	1.89251	0.00501256	2.53906	0.000183283	chr5.75520083.75520868	2.07586	0.000809617	2.13227	1.43818e-05	chr13.109844009.109844879	1.88914	0.00658146	2.02531	0.000689688
chr15.8829477.8829830	3.89655	6.60739e-05	3.20954	0.00126833	chr5.75646865.75647503	1.88569	0.00393224	1.58768	0.00235825	chr13.109886526.109887144	2.74123	0.000257431	1.936	0.00125978
chr15.9547379.9548106	2.51823	0.00126301	3.19558	5.9198e-05	chr5.75840413.75841509	2.25642	0.000161853	1.89253	2.38442e-05	chr13.110048678.110049443	2.5231	2.82333e-06	2.35221	5.21986e-09
chr15.10410911.10411460	2.24347	0.00175971	2.78004	0.000203848	chr5.78032509.78033359	1.8719	0.00431185	1.28495	0.00811357	chr13.110450095.110450447	2.35745	0.00850862	2.49903	0.00101928
chr15.10425821.10427442	1.56332	0.00785184	2.10331	0.000266562	chr5.79273507.79274467	2.15253	0.0023231	1.48833	0.0089345	chr13.110579818.110580488	2.72449	2.17718e-07	2.28703	4.55299e-10
chr15.10840015.10841308	2.04482	0.000183798	2.08099	8.89152e-05	chr5.81924270.81925040	2.62164	0.000348676	2.47838	3.2957e-05	chr13.110632919.110633851	1.94289	0.00169932	1.66888	0.000444664
chr15.11095596.11095938	2.22192	0.00649639	2.75426	0.0010714	chr5.81968894.81969540	2.06576	0.00494516	2.09041	0.00105895	chr13.110704869.110705551	2.76903	2.67812e-05	1.85377	0.000262018
chr15.11392856.11393776	2.58952	0.000221675	1.72547	0.00848047	chr5.82135390.82136005	3.40129	2.7675e-06	2.00609	0.00018491	chr13.110774685.110775613	3.46591	2.86646e-08	2.84314	4.80779e-09
chr15.11861043.11861661	2.56933	7.10599e-05	1.96173	0.00229345	chr5.85594547.85595367	1.87457	0.00281617	1.44427	0.00176047	chr13.110836068.110837295	1.79709	0.00420626	1.46427	0.00358506
chr15.11866899.11867499	2.86585	3.1822e-05	2.68161	0.00010695	chr5.86436802.86437938	1.69851	0.00728082	1.91262	0.000135337	chr13.111001357.111002235	2.78365	1.6964e-05	2.4202	2.28998e-06
chr15.12106141.12106884	1.82656	0.00310046	2.67488	3.6106e-05	chr5.89070862.89071611	2.31016	0.00264557	2.08972	0.00154827	chr13.111078463.111079343	3.04392	4.73125e-06	2.0678	3.66014e-05
chr15.12889708.12890287	2.20965	0.000926699	1.86226	0.00339058	chr5.89103772.89104670	1.63266	0.00971134	1.9356	0.000114278	chr13.111142743.111143779	3.10203	1.04359e-07	1.03592	0.00446556
chr15.13138546.13139181	2.33031	0.00296476	2.76448	0.000792005	chr5.89106567.89107015	2.10736	0.00140222	1.61082	0.00179443	chr13.111322930.111323956	2.07658	0.000261613	1.04532	0.00868997
chr15.13527838.13528728	2.20149	0.00167065	1.77454	0.00953685	chr5.89127973.89128668	2.53214	1.39194e-05	1.89137	6.9122e-06	chr13.111391043.111391643	3.30986	2.66753e-05	2.11913	0.000306043
chr15.13654811.13655769	1.74577	0.00532214	2.40542	0.000176278	chr5.89254217.89254943	2.25054	0.000751761	2.45589	6.39766e-07	chr13.112220223.112221960	2.05996	3.60631e-05	1.17335	0.000379891
chr15.13764609.13766048	2.51441	2.33098e-05	2.5852	4.13129e-06	chr5.89403161.89404156	2.45784	0.000259758	1.71947	0.00100285	chr13.112425202.112425917	1.99157	0.00489329	1.67002	0.00415522
chr15.15558751.15559817	2.27708	4.1326e-05	2.61727	1.9188e-06	chr5.92235237.92236053	2.59547	0.000424505	1.82995	0.00190809	chr13.113251892.113252506	2.91173	4.30774e-05	1.79921	0.000948197
chr15.16515206.16515684	2.38377	0.00511842	2.58682	0.00441729	chr5.96604107.96605111	1.97243	0.00137104	1.47185	0.00190241	chr13.113346236.113346955	1.94539	0.0051474	1.95223	0.00040182
chr15.17466786.17467715	2.11885	0.00578166	2.19905	0.00488685	chr5.99227157.99227851	2.5428	0.000356189	1.91827	0.000898652	chr13.113536723.113537389	2.31184	0.000711587	1.99681	0.000319466
chr15.17889130.17889780	2.30571	0.00362437	3.6135	1.99962e-05	chr5.100191389.100192181	2.03819	0.000762344	2.66037	9.72424e-08	chr13.113769722.113770258	2.10537	0.00658248	1.80534	0.00489663
chr15.18032507.18033416	2.58869	5.22087e-05	1.86944	0.00211262	chr5.100912324.100912738	2.66696	0.00157666	2.33356	0.00118515	chr13.113783581.113784163	2.29023	0.0022436	2.49815	0.000100631
chr15.18079330.18080201	2.02363	0.0048713	2.35506	0.0013716	chr5.101070122.101070683	2.79817	0.000805604	1.81391	0.00839238	chr13.114992147.114993011	1.92434	0.000545998	2.66188	2.33084e-08
chr15.18685242.18686078	2.05693	0.0022406	2.67523	0.000167867	chr5.104978831.104979421	2.53594	0.00220271	1.98652	0.00395255	chr13.115379682.115380713	3.15056	2.24739e-06	2.40339	6.64804e-06
chr15.19316200.19316977	2.62018	0.000450961	2.24197	0.00257385	chr5.105648517.105649857	2.51228	2.0552e-05	1.50671	0.00017786	chr13.115388684.115389284	2.97124	9.32431e-07	2.96562	7.9452e-09
chr15.20413335.20413975	2.27765	0.00157025	2.18765	0.00265619	chr5.106394675.106395055	2.47177	0.00443235	2.33255	0.00198377	chr13.115436482.115437279	2.80149	9.19861e-05	1.85042	0.000378765
chr15.20551023.20551596	2.90101	0.000453411	2.50214	0.00156564	chr5.112374026.112374375	2.81048	0.00146956	2.15412	0.00425977	chr13.115539069.115539915	1.93669	0.000898311	1.42033	0.00112911
chr15.21092578.21093274	1.90913	0.00823297	2.28804	0.00190332	chr5.114780896.114781946	2.35162	0.00164473	1.66371	0.00175676	chr13.115632988.115633841	2.06146	0.00411814	1.9544	0.00144809
chr15.21555552.21556493	1.92822	0.00602614	2.23035	0.00167485	chr5.118967651.118968210	2.19082	0.00523282	2.52194	0.00012739	chr13.116087383.116088141	2.38894	0.00111251	1.55455	0.00736
chr15.22914085.22914889	2.54238	0.000218667	2.10239	0.00110887	chr5.118994303.118995036	2.54576	0.000552391	2.36905	4.25714e-05	chr13.116174867.116175558	2.87327	8.30851e-06	1.57147	0.000799965
chr15.23378059.23379114	1.69474	0.007944	1.83324	0.00311672	chr5.121389096.121389572	2.08193	0.00610615	2.59204	6.59309e-06	chr13.116722786.116724199	2.31944	0.000127336	1.45087	0.00136662
chr15.24457632.24458158	2.19667	0.00633093	2.28638	0.00537287	chr5.125946516.125947490	3.67995	5.4325e-09	2.55993	7.36869e-09	chr13.116781232.116782069	1.75545	0.00130202	1.95344	2.99174e-06
chr15.24630904.24631576	2.72902	0.000973198	3.21076	6.08313e-05	chr5.130097394.130098413	2.16911	0.00323593	1.63767	0.00536174	chr13.116806618.116807585	2.14925	0.000619459	1.3752	0.00540218
chr15.24720330.24721118	1.915	0.00500986	2.48954	0.000451237	chr5.131046196.131046980	3.40863	2.24646e-05	2.50908	9.60188e-05	chr13.116822967.116823615	2.60076	0.000328542	2.22395	0.000155966
chr15.25036131.25036887	2.02036	0.00257206	2.27424	0.000773652	chr5.131215353.131215944	2.56327	0.00137878	1.97158	0.00293419	chr13.116919773.116920416	3.03741	5.32118e-05	2.03798	0.000262035
chr15.25925913.25926726	1.73942	0.00541164	1.79307	0.00273662	chr5.133676718.133677289	2.3242	0.00227229	2.79386	4.62617e-05	chr13.116958681.116959260	1.85774	0.00324164	1.67836	0.00096676
chr15.26618025.26618453	2.37536	0.00150068	2.72778	0.000418162	chr5.138782917.138783629	2.05342	0.00489695	1.95314	0.00153409	chr13.116960999.116961990	2.92791	1.01277e-07	2.06428	8.91651e-08
chr15.26747832.26748992	1.84997	0.00388901	1.74643	0.00407866	chr5.140263868.140264942	1.76058	0.00351374	1.81665	3.59405e-05	chr13.116970689.116971449	1.8682	0.000784237	1.25578	0.000284184
chr15.27043603.27044189	2.38144	0.00297306	2.54313	0.00167695	chr5.140464871.140465602	2.47872	0.00196418	2.02119	0.00290461	chr13.117129623.117130388	1.66247	0.00815209	1.48224	0.0035255
chr15.27321963.27322677	1.90121	0.00300149	3.06105	8.45704e-06	chr5.141403511.141404084	2.60836	0.00193303	2.4236	0.000975602	chr13.117258232.117259025	2.68859	7.56873e-05	2.40597	1.16976e-05
chr15.27684812.27685179	2.93871	0.000211445	2.19265	0.00526839	chr5.144465346.144465856	3.25089	0.000112942	1.85927	0.00450303	chr13.117383494.117384346	2.79756	5.29037e-06	2.05242	8.69753e-06
chr15.28038180.28038909	2.64231	0.000911985	2.26985	0.00565927	chr5.144594570.144595272	2.53554	9.33783e-05	2.98967	8.08116e-08	chr13.117949639.117950323	2.95345	9.5365e-05	1.95966	0.000353344
chr15.28212802.28213600	2.18396	0.000530924	2.87546	1.15274e-05	chr5.144809863.144810320	2.80178	0.00112569	2.56208	0.00039151	chr13.118209485.118210018	2.44548	0.00208825	2.16557	0.00120702
[truncated: 4,656 more rows]
