# Supplementary material for: Machine learning sequence prioritization for cell type-specific enhancer design
Source: bioRxiv preprint, doi:10.1101/2021.04.15.439984, version 1 (2021-04-15)
Supplement: Supplemental Table 10 [file 439984_file26.xlsx]

## Sheet: res_megabg.filt.str
peak	STRcSNAILPVvsSTRBulk_log2FoldChange	STRcSNAILPVvsSTRBulk_padj	STRSC1vsSTRBulk_log2FoldChange	STRSC!vsSTRBulk_padj	STRSC2vsSTRBulk_log2FoldChange	STRSC2vsSTRBulk_padj	STREf1avsSTRBulk_log2FoldChange	STREf1avsSTRBulk_padj
chr1.3012426.3012845	-1.84283	0.18195	-1.07631	0.761272	-0.969006	0.979263	0.410947	1
chr1.3094461.3095794	0.810522	0.965978	0.0788914	1	0.205344	1	-0.295542	1
chr1.3100662.3101501	-1.88533	0.0286733	-1.26272	0.246451	-1.58407	0.0648882	0.387039	1
chr1.3119337.3120947	1.27221	0.498475	0.884414	1	1.30367	0.453251	0.831584	1
chr1.3121342.3121694	0.0583224	1	-0.0539561	1	0.418825	1	-0.711487	1
chr1.3204779.3205182	1.427	0.812074	1.2102	1	0.994719	1	0.448728	1
chr1.3207011.3207538	0.699073	1	0.855712	1	0.383393	1	0.405729	1
chr1.3210910.3211300	-1.18825	0.96141	-0.309219	1	0.189706	1	-0.687362	1
chr1.3212530.3213231	-2.02543	0.0395323	-1.52467	0.0977839	-1.79815	0.0398553	-1.74959	0.266547
chr1.3217068.3217632	-0.572202	1	-0.42005	1	-0.396831	1	0.022425	1
chr1.3219273.3220005	-1.31183	0.120218	-1.72459	0.00159366	-1.73309	0.00290193	-0.352049	1
chr1.3227963.3228456	-0.192323	1	0.220205	1	0.0728468	1	0.639308	1
chr1.3249656.3250354	-1.86402	0.0235455	-1.33647	0.154985	-1.17536	0.361029	0.683454	1
chr1.3264727.3265907	-1.35038	0.266368	-0.758607	1	-0.858187	0.988935	-0.0841934	1
chr1.3292303.3293780	-1.16621	0.30078	-0.63036	1	-0.914399	0.683909	-0.310246	1
chr1.3297471.3297900	-0.181284	1	0.062833	1	-0.738744	1	-0.451708	1
chr1.3299355.3300124	-1.33986	0.662619	-0.365317	1	-1.24785	0.704904	-0.727663	1
chr1.3309407.3310836	-1.0091	0.685202	-0.507526	1	-0.193804	1	0.506165	1
chr1.3321543.3321797	-0.244818	1	-0.0537841	1	0.0584747	1	-0.463967	1
chr1.3321903.3323192	0.457829	1	0.54456	1	0.762686	1	0.717195	1
chr1.3324130.3324690	-1.58444	0.268053	-1.56039	0.16153	-1.72133	0.119194	-1.32039	1
chr1.3325166.3325558	-0.397253	1	-0.0805008	1	-0.788386	1	-0.358275	1
chr1.3330159.3330909	-0.870627	1	-1.1112	0.786663	-1.05668	0.902651	-0.232785	1
chr1.3333509.3334155	-3.29681	3.40701e-06	-2.16636	7.12037e-05	-1.97331	0.00124103	-2.3768	0.0003564
chr1.3359724.3361286	1.13989	0.45837	0.194789	1	0.519906	1	0.0395309	1
chr1.3366271.3367200	0.574345	1	0.515972	1	0.575996	1	-0.109192	1
chr1.3367834.3368768	-1.4589	0.0851381	-1.85274	0.0015366	-1.64173	0.0151318	-1.95194	0.0108167
chr1.3369332.3369999	0.535331	1	-0.625718	1	-0.409389	1	-0.424084	1
chr1.3371486.3372234	-1.31359	0.351367	-0.590319	1	-0.478507	1	0.514687	1
chr1.3377049.3377819	0.386084	1	0.92175	1	0.734982	1	0.159048	1
chr1.3381043.3382321	-0.714536	1	-1.10645	0.33446	-1.45272	0.0631163	-0.314449	1
chr1.3385952.3386475	-0.84509	1	-0.555966	1	-0.281063	1	-0.302393	1
chr1.3388300.3388792	0.0950953	1	-0.198012	1	0.380929	1	0.842726	1
chr1.3391619.3392663	0.623551	1	-0.00398508	1	0.336269	1	0.349496	1
chr1.3395363.3395927	0.0485589	1	0.475045	1	-0.159209	1	-0.00938142	1
chr1.3398914.3400640	-1.58461	0.00637231	-0.66102	1	-0.773797	0.901623	0.473999	1
chr1.3405810.3406591	0.15973	1	-0.345724	1	-0.257534	1	-0.721219	1
chr1.3407143.3407749	-0.670776	1	-0.0245659	1	-0.322418	1	0.343978	1
chr1.3409133.3409580	-1.09566	0.754226	-1.1151	0.648166	-1.4259	0.2944	0.261654	1
chr1.3410425.3412004	-0.596329	1	-0.282687	1	-0.401159	1	-0.183758	1
chr1.3416130.3416539	0.513806	1	0.415072	1	-0.273199	1	-0.46231	1
chr1.3433484.3434693	-1.34857	0.112847	-1.18596	0.185289	-1.28518	0.118073	0.0959087	1
chr1.3448179.3448507	-3.73207	0.0193228	-1.09381	0.893747	-1.17441	0.817662	-1.385	1
chr1.3451520.3452047	0.12438	1	-0.435425	1	-0.671773	1	-0.0738108	1
chr1.3455211.3455662	-1.54139	0.580726	-0.107014	1	0.201225	1	-0.576634	1
chr1.3457673.3458330	-1.7835	0.00376379	-1.69891	0.00169669	-1.15276	0.200602	-0.196158	1
chr1.3466117.3467106	-1.43544	0.0831819	-0.934556	0.588088	-1.14655	0.25448	-0.24515	1
chr1.3494102.3494675	-1.48547	0.528669	-0.744618	1	-0.915538	1	-1.08302	1
chr1.3508161.3508584	0.141692	1	-0.354062	1	-0.32224	1	-0.980363	1
chr1.3514567.3515488	-0.513339	1	-0.908489	0.798798	-1.33333	0.18074	-1.69403	0.168246
chr1.3532204.3532866	-1.70072	0.312118	-1.19156	0.672354	-1.38311	0.479708	-1.38048	1
chr1.3532990.3533864	1.2572	0.864183	1.10231	1	0.780906	1	0.943486	1
chr1.3540765.3541039	-1.36938	0.69227	-1.18006	0.80772	-1.39822	0.592798	-1.30649	1
chr1.3552434.3552904	0.270009	1	-0.157374	1	-0.151783	1	-0.986483	1
chr1.3576220.3576558	-0.326137	1	-0.408585	1	0.232034	1	-0.104309	1
chr1.3580001.3580885	-1.67145	0.181999	0.0442129	1	-0.00501837	1	0.664382	1
chr1.3601344.3601751	-1.7688	0.128687	-1.72963	0.0636579	-1.56781	0.158664	0.398322	1
chr1.3611116.3611804	-1.63813	0.1328	-1.17726	0.418633	-1.49041	0.151033	-0.842965	1
chr1.3627820.3628437	-0.414655	1	-0.0963252	1	-0.247157	1	1.46875	1
chr1.3639055.3639326	-0.878459	1	-0.00952451	1	-0.274941	1	0.719388	1
chr1.3643048.3643903	-0.374878	1	0.18446	1	0.0485908	1	-0.385487	1
chr1.3648578.3648869	-1.99591	0.0652321	-1.41669	0.228003	-1.78714	0.0695452	-0.414468	1
chr1.3651202.3651770	-1.41019	0.304788	-0.679541	1	-0.395227	1	0.0508752	1
chr1.3659287.3659682	-0.3585	1	-0.951624	1	-0.624888	1	-0.858962	1
chr1.3662128.3663112	0.0973948	1	0.228698	1	0.265498	1	0.0665757	1
chr1.3667298.3667561	-1.6461	0.0451889	-1.41363	0.0829655	-1.23804	0.242749	-0.14272	1
chr1.3670471.3672657	-0.970245	0.190441	-0.738563	0.772221	-0.844244	0.418042	-0.100745	1
chr1.3709968.3710899	-0.410444	1	-0.519007	1	-0.169059	1	0.245119	1
chr1.3741672.3742554	2.14473	0.252812	1.39748	0.846829	1.98417	0.354857	1.25629	1
chr1.3786695.3787304	-0.0226057	1	0.0263976	1	-0.0288285	1	0.425668	1
chr1.3812871.3813507	-1.81133	0.00983499	-2.29097	1.2324e-05	-2.02639	0.000568313	-0.386636	1
chr1.3841217.3841705	-1.03894	0.981093	-0.586517	1	-0.632021	1	-0.613277	1
chr1.3841980.3842309	-1.14782	0.878607	-1.37002	0.530989	-1.45886	NA	0.456245	NA
chr1.3853756.3854156	-1.84961	0.215855	-1.56217	0.266446	-1.8484	0.141301	-0.395733	1
chr1.3900173.3900828	-0.852606	1	-0.650584	1	-0.349419	1	0.570636	1
chr1.3903443.3903987	0.336835	1	-0.276468	1	-0.345579	1	0.425119	1
chr1.3909059.3910238	-0.329248	1	-0.574149	1	-0.55799	1	0.578626	1
chr1.3912406.3913234	-2.55882	3.26233e-07	-2.05969	2.06318e-06	-2.0119	1.52945e-05	-0.383177	1
chr1.3932375.3933328	-0.0795656	1	-0.0255511	1	-0.743667	1	0.327326	1
chr1.3942496.3943387	-1.46228	0.145014	-1.83436	0.00742189	-1.82231	0.0124377	-0.572998	1
chr1.3969987.3971009	-0.142884	1	1.18179	0.556708	0.251512	1	1.08039	1
chr1.3971976.3973059	-0.144524	1	0.309928	1	-0.821157	1	0.83147	1
chr1.3978654.3979663	-0.141846	1	-0.273129	1	-0.39656	1	0.446868	1
chr1.3990313.3990924	-1.21939	0.878109	-1.07806	0.984176	-0.989413	1	-0.0164687	1
chr1.3994269.3995494	-2.31177	0.00818889	-1.20688	0.340387	-1.40829	0.180803	-0.40461	1
chr1.4033536.4034026	-0.161924	1	0.317644	1	0.269777	1	0.784617	1
chr1.4034832.4035084	1.52865	1	1.66889	1	1.56285	NA	2.33019	NA
chr1.4053465.4054064	-2.251	2.11687e-05	-2.44698	1.48651e-08	-2.23191	2.04534e-06	-0.890295	1
chr1.4058569.4058984	0.198238	1	0.215885	1	-0.656096	1	1.06025	1
chr1.4068665.4069480	-1.29988	0.888278	-0.836293	1	-0.146026	1	0.112542	1
chr1.4087548.4087896	-2.94589	0.0190159	-1.97556	0.0708003	-2.08817	NA	-0.19689	NA
chr1.4089257.4090523	-0.211707	1	0.0872682	1	0.175561	1	0.895867	1
chr1.4097700.4098529	-0.981371	0.769906	-1.29316	0.22015	-0.771138	1	-0.195527	1
chr1.4134959.4135959	-2.12259	0.0022893	-1.31966	0.138374	-1.32182	0.158168	0.106864	1
chr1.4139028.4139782	-1.1263	0.829559	-0.681989	1	-0.527024	1	-0.222979	1
chr1.4142058.4142901	-1.07668	0.282942	-1.08133	0.183682	-0.94111	0.465552	-0.19134	1
chr1.4186615.4187697	-0.455494	1	-1.3928	0.72324	-1.14174	1	-0.0882858	1
chr1.4228191.4228815	-1.25149	0.324755	-0.714395	1	-1.0885	0.470107	-0.480627	1
chr1.4273149.4273498	0.800587	1	-0.241612	1	1.24095	1	0.657051	1
chr1.4332152.4332848	-1.68926	0.00910106	-1.3028	0.0638012	-1.42503	0.0326089	-0.458413	1
chr1.4351988.4352267	-1.20728	1	-0.609173	1	-0.387439	NA	-0.47909	NA
chr1.4382734.4383105	-0.105818	1	0.688623	1	0.246657	1	1.37746	1
chr1.4392189.4393407	-0.0572937	1	0.67323	1	0.515201	1	0.510572	1
chr1.4412325.4412842	0.0805326	1	-0.0422177	1	-0.0263722	1	-0.41011	1
chr1.4414037.4415298	0.653622	1	0.904292	0.907834	1.06979	0.594639	0.348529	1
chr1.4416504.4417114	0.21736	1	2.11093	0.0535913	0.351748	1	0.858926	1
chr1.4422137.4422693	-0.979012	1	-0.263223	1	-0.632752	1	0.0125271	1
chr1.4432195.4432738	0.720742	1	1.13227	1	0.91243	1	1.29475	1
chr1.4455792.4457077	0.81026	1	1.19632	0.801461	1.0083	1	1.45951	1
chr1.4470886.4471927	-0.221274	1	-0.204514	1	-0.721673	1	0.181908	1
chr1.4491619.4493869	-0.416292	1	0.0409181	1	-0.696844	1	0.0153429	1
chr1.4516581.4517172	-1.01514	0.95819	0.24052	1	-0.443201	1	0.399364	1
chr1.4519333.4519680	-3.38466	0.00172381	-1.28618	0.421287	-2.71118	0.00175876	-1.46201	1
chr1.4527336.4527674	-1.58519	0.827182	-0.923789	1	-0.0743986	1	-0.000934866	1
chr1.4543816.4544526	-0.744045	1	-0.234291	1	-1.39891	0.354291	-1.6152	0.818427
chr1.4571194.4572385	-1.27797	0.0579114	-1.20551	0.0595876	-1.44788	0.00691052	-1.21067	0.411694
chr1.4611603.4612130	-0.946156	1	-0.0185888	1	-0.86209	1	-0.502163	1
chr1.4622143.4623148	-1.4504	0.151139	-1.45721	0.0846489	-1.53059	0.069348	0.00681613	1
chr1.4688850.4689696	-0.769526	1	-0.731819	1	-0.70251	1	0.187602	1
chr1.4703051.4704103	1.76093	0.173786	0.677391	1	0.672984	1	0.913785	1
chr1.4722231.4723429	-2.20096	0.00572272	-2.26566	0.000631601	-2.2953	0.000948891	-2.38015	0.00559634
chr1.4747026.4748656	-0.363907	1	-0.512214	1	-0.213945	1	0.417912	1
chr1.4766516.4767261	-1.73768	0.0348937	-1.53694	0.0461769	-1.68602	0.0240966	-0.711147	1
chr1.4768311.4768688	0.0340005	1	0.646011	1	0.487506	1	0.280642	1
chr1.4769768.4771018	-0.572049	1	-0.295727	1	-0.533382	1	-0.124177	1
chr1.4780077.4780635	0.18456	1	0.326451	1	-0.478688	1	-0.440267	1
chr1.4785063.4786321	-0.707146	0.976213	-0.547701	1	-0.807934	0.620437	-0.193941	1
chr1.4807298.4808595	-0.661585	1	-0.594638	1	-0.778111	0.725439	-0.294639	1
chr1.4819471.4820394	-2.03697	0.000545097	-1.13013	0.195162	-1.19302	0.156143	0.188021	1
chr1.4831012.4831819	-2.09911	3.73893e-05	-2.1669	2.44859e-07	-2.15342	1.28898e-06	-0.570667	1
chr1.4833354.4833876	-1.27186	1	-1.22414	1	-0.652186	NA	-0.986748	NA
chr1.4857331.4858780	-0.603194	1	-0.598947	1	-0.69964	0.990027	-0.254322	1
chr1.4868800.4869356	-0.777696	1	-0.829416	1	-1.11861	0.843524	-0.109064	1
chr1.4872888.4874246	-1.23511	0.196758	-0.851202	0.80073	-0.975611	0.527139	0.280473	1
chr1.4876567.4876831	-0.529429	1	-1.07766	0.844571	-0.79508	NA	-0.335145	NA
chr1.4881204.4882037	0.797518	1	0.0907598	1	0.55836	1	0.0447597	1
chr1.4907710.4908692	-0.386326	1	-0.474166	1	-0.63261	1	0.21137	1
chr1.4910842.4911246	0.0612055	1	0.814203	1	0.540991	1	-0.646512	1
chr1.4914420.4914887	-1.38164	0.306413	-0.682277	1	-1.28237	0.331496	-0.378684	1
chr1.4917385.4917962	-0.276945	1	0.661211	1	0.15809	1	0.335577	1
chr1.4918656.4919143	-1.28871	0.203723	-1.38911	0.0642756	-1.57667	0.026097	-0.50747	1
chr1.4922905.4923839	-1.03944	0.979452	-0.881351	1	-0.65606	1	-0.783586	1
chr1.4925815.4927371	-0.934375	0.555739	-0.458731	1	-0.481168	1	0.482447	1
chr1.4934603.4935610	-1.63626	0.0108958	-1.22393	0.122315	-1.30725	0.079352	0.37986	1
chr1.4961501.4962322	-0.714282	1	-0.699246	1	-0.827482	1	0.730618	1
chr1.4969768.4971570	-1.10167	0.12822	-0.500272	1	-0.735562	0.910102	0.044708	1
chr1.4989914.4990779	-1.61812	0.0852329	-0.727131	1	-0.942395	0.772541	-0.246521	1
chr1.5002921.5003145	-1.18866	0.874714	-0.580271	1	-0.557112	NA	0.589506	NA
chr1.5015333.5015988	-1.35332	0.0508468	-1.56702	0.00311444	-1.34421	0.0360834	0.233871	1
chr1.5017859.5021055	-0.629321	1	-0.0107887	1	-0.275222	1	0.497109	1
chr1.5022580.5023745	-1.65011	0.0112042	-0.762851	1	-1.27491	0.10638	-0.676114	1
chr1.5029379.5030219	-1.21228	0.184795	-1.16016	0.173362	-1.25455	0.109813	0.534843	1
chr1.5031540.5031989	-1.71127	0.00456381	-1.59398	0.00326264	-1.43465	0.0222431	0.0496322	1
chr1.5033103.5033777	-1.84738	0.0783798	-0.534159	1	-1.84997	0.048427	-1.91118	0.237998
chr1.5045659.5046248	2.1696	0.529002	1.18181	1	1.66685	0.90677	0.75983	1
chr1.5055638.5056382	-1.01494	0.597959	-1.05417	0.432275	-1.36435	0.116463	0.294862	1
chr1.5064427.5065018	-1.60629	0.183735	-1.14494	0.527371	-1.20796	0.478442	-0.14114	1
chr1.5068794.5069324	-1.51012	0.204626	-1.30554	0.268293	-1.15997	0.495096	-0.886944	1
chr1.5069964.5070873	-1.2999	0.0571563	-0.80528	0.780934	-1.0319	0.262635	0.00329423	1
chr1.5071100.5071775	-1.38999	0.172836	-1.7061	0.0158503	-1.55444	0.0532354	-0.180385	1
chr1.5074227.5074567	-1.57767	0.151074	-1.66684	0.0479274	-2.34892	0.00167418	0.00295643	1
chr1.5082623.5083763	-0.571965	1	-0.484103	1	-0.732366	0.804381	-0.0444682	1
chr1.5087151.5087361	-1.16151	0.709673	-1.02218	0.838169	-0.977025	0.951836	0.352275	1
chr1.5091752.5092645	-1.62979	0.067903	-1.38857	0.115426	-1.20208	0.318802	-0.191029	1
chr1.5102863.5104039	-0.616646	1	-0.257622	1	-0.247004	1	0.320297	1
chr1.5106449.5107095	-0.530616	1	-0.536042	1	-0.575807	1	-0.401979	1
chr1.5115461.5116327	-0.423364	1	-0.194834	1	-0.137051	1	0.147893	1
chr1.5116556.5117546	0.235391	1	0.16858	1	-0.0280808	1	-0.122884	1
chr1.5127119.5127953	-0.945748	0.764176	-0.404094	1	-0.395691	1	0.591032	1
chr1.5128224.5129289	0.552685	1	0.428728	1	0.261237	1	-0.390155	1
chr1.5130041.5130912	-0.236063	1	0.128297	1	-0.212901	1	0.239445	1
chr1.5137947.5138667	-0.523106	1	-0.609428	1	-1.00041	1	-0.313055	1
chr1.5141628.5142061	-0.856357	1	-0.214479	1	-0.449252	1	0.482779	1
chr1.5176817.5177952	-0.64682	1	-0.306728	1	-0.0635608	1	0.223757	1
chr1.5181927.5182454	-1.57373	0.127263	-1.8679	0.0120141	-1.8974	0.0146224	0.268903	1
chr1.5183163.5184020	-1.67025	0.00632227	-1.59256	0.00283292	-1.59183	0.00480819	-0.133949	1
chr1.5185354.5185804	-1.29753	0.268432	-1.5957	0.0309279	-1.23711	0.265174	-0.611908	1
chr1.5207857.5208933	-0.956756	0.656182	-0.943109	0.615502	-0.861822	0.839482	0.149451	1
chr1.5209793.5210542	-1.79825	0.00658294	-1.87791	0.000514418	-1.74969	0.00343843	-0.248646	1
chr1.5213695.5214083	0.270894	1	0.473867	1	-0.825165	NA	1.0984	1
chr1.5220333.5221480	-1.30094	0.101905	-0.250667	1	-0.882505	0.650253	0.322912	1
chr1.5228578.5229423	-1.24023	0.475525	-0.929851	0.903383	-1.7628	0.0540036	-1.37921	1
chr1.5232668.5233342	-1.74024	0.0865912	-0.520557	1	-1.00337	0.745002	-1.11194	1
chr1.5243305.5243588	-0.826197	1	-0.627851	1	-0.494688	1	-0.254744	1
chr1.5249168.5250046	-1.93675	0.000242716	-2.01485	2.59694e-06	-1.97407	1.8358e-05	-0.220625	1
chr1.5273894.5274327	-0.995893	0.942888	-1.36652	0.371159	-1.66744	0.172774	0.128487	1
chr1.5278837.5279918	0.525292	1	0.0321684	1	0.233647	1	1.07682	1
chr1.5285302.5285631	2.78627	0.207349	1.64728	0.88272	2.51323	0.333321	2.52268	1
chr1.5287802.5288479	0.794808	1	0.125322	1	0.500395	1	0.4044	1
chr1.5296976.5298517	-0.0186214	1	0.0932143	1	0.241783	1	0.500089	1
chr1.5315348.5316677	0.544686	1	1.56557	0.245385	0.743082	1	1.01115	1
chr1.5334182.5335233	0.722825	1	0.0374655	1	0.560174	1	0.968243	1
chr1.5336175.5336936	-0.157651	1	-0.218481	1	-0.103871	1	0.864707	1
chr1.5346133.5346609	-0.627276	1	-1.69421	0.73736	-0.821803	1	0.246231	1
chr1.5362189.5362792	0.0149724	1	-0.769989	1	-0.181063	1	0.444103	1
chr1.5379341.5379574	-0.0841198	1	-0.509168	1	-0.286679	NA	0.903031	1
chr1.5382148.5383467	-0.776238	1	-0.761018	1	-0.234869	1	0.4824	1
chr1.5394393.5395294	0.602685	1	0.276044	1	-0.0580795	1	0.775116	1
chr1.5404361.5404801	0.355396	1	0.883112	1	1.55054	NA	2.72367	NA
chr1.5510428.5511543	-1.38921	0.14021	-1.1674	0.248083	-1.09507	0.388391	0.670791	1
chr1.5541455.5541891	-1.38495	0.474507	-0.761056	1	-1.38143	0.404429	0.146187	1
chr1.5587906.5589688	-0.919369	0.384295	-0.656492	1	-0.789266	0.703224	0.203006	1
chr1.5602317.5603179	-2.43123	0.000610155	-1.96629	0.00327423	-2.01028	0.00356806	-0.294207	1
chr1.5608192.5608704	-0.676946	1	-0.0850983	1	-0.0409442	1	0.917249	1
chr1.5642115.5642579	-0.542529	1	-0.655138	1	-0.85345	1	0.357317	1
chr1.5655345.5656578	-1.32329	0.112535	-0.924774	0.602977	-0.847318	0.824012	0.802125	1
chr1.5689093.5689752	0.610526	1	1.34929	1	0.867491	1	1.87705	1
chr1.5728511.5729668	-1.89591	0.00227836	-2.14738	1.74154e-05	-1.94367	0.000439119	-0.686237	1
chr1.5752878.5754104	-1.6196	0.0222551	-1.71308	0.00402506	-1.52358	0.0263667	-0.00752402	1
chr1.5780200.5781445	-0.763777	1	-0.0172672	1	-0.240095	1	0.876976	1
chr1.5787398.5787696	-0.553716	1	0.89122	1	0.123517	NA	-0.266821	NA
chr1.5791586.5792341	1.66828	0.507756	2.82563	0.022239	2.09129	0.221235	1.5701	1
chr1.5814592.5816595	-1.70438	0.012207	-1.56673	0.0149359	-1.59318	0.0152396	-0.0918676	1
chr1.5827596.5827973	-2.30522	0.00720253	-1.78026	0.0428246	-1.63531	0.103273	0.366096	1
chr1.5828719.5830357	-1.62543	0.00973695	-1.03566	0.324103	-1.16542	0.171094	0.433403	1
chr1.5866106.5867275	-1.58502	0.0185561	-2.02331	4.98882e-05	-1.8472	0.000763037	-0.357758	1
chr1.5879922.5880535	-1.71286	0.158847	-1.55172	0.141169	-1.28541	0.415464	0.408827	1
chr1.5894134.5895640	-0.324324	1	-0.706455	1	-0.645334	1	0.18044	1
chr1.5904696.5905405	-0.493143	1	-0.359786	1	-0.749768	1	0.159427	1
chr1.5915184.5918155	-0.955468	0.120046	-0.947964	0.0822092	-0.832576	0.310757	-0.0722834	1
chr1.5925815.5926449	-0.837187	1	0.449396	1	-0.00479372	1	-0.0857915	1
chr1.5938900.5939453	-0.823049	1	-0.323138	1	-0.253567	1	0.300457	1
chr1.5955189.5956492	-0.69434	1	0.12729	1	-0.140605	1	0.152015	1
chr1.6039707.6040343	-0.814242	1	-0.786143	1	-1.12071	0.804294	0.0786778	1
chr1.6049556.6050104	0.139488	1	0.413938	1	0.718839	1	1.16181	1
chr1.6053673.6054548	0.0532195	1	0.0707978	1	0.869485	1	0.0174579	1
chr1.6081641.6082406	2.30983	0.0120398	0.641307	1	1.26079	0.607397	0.679567	1
chr1.6092462.6092957	1.85688	0.711154	0.581599	1	1.30531	1	1.87559	1
chr1.6093863.6094951	-1.9797	0.00100958	-1.73111	0.00185982	-1.70708	0.00376689	-0.0516058	1
chr1.6100201.6101137	0.486659	1	0.914766	1	0.849457	1	0.811154	1
chr1.6131915.6132300	-0.21569	1	-0.466047	1	-0.24413	1	-0.272602	1
chr1.6134599.6135769	-1.0408	0.245363	-0.96811	0.274004	-0.901511	0.453811	-0.194235	1
chr1.6152179.6153123	-1.28005	0.0778039	-1.33375	0.0212971	-1.24581	0.0628477	-0.527726	1
chr1.6178432.6179292	-2.13975	0.00198949	-1.7048	0.0135179	-1.93957	0.00306828	-0.547375	1
chr1.6188306.6189301	-1.40912	0.272425	-0.470019	1	-0.808164	1	-0.155828	1
chr1.6190007.6190944	-1.94139	0.00131196	-1.85342	0.000532495	-1.7696	0.00219792	-0.467215	1
chr1.6203710.6205062	-1.18868	0.38013	-0.868997	0.868823	-1.09966	0.437449	-0.46519	1
chr1.6214069.6215777	-0.330238	1	-0.214676	1	-0.359829	1	-0.0329563	1
chr1.6219705.6220181	-0.489339	1	0.147743	1	0.19278	1	-0.383006	1
chr1.6220903.6221607	-1.50017	0.0583592	-1.15236	0.225726	-0.932141	0.651014	-0.397096	1
chr1.6224052.6224642	-0.866444	1	-0.46237	1	-0.604861	1	-0.402228	1
chr1.6224965.6226598	-0.786955	0.786659	-0.700644	1	-0.718656	0.997727	-0.530964	1
chr1.6234636.6235246	-0.0365369	1	0.104481	1	0.312069	1	-0.0707959	1
chr1.6236698.6237476	-0.788723	1	-0.743799	1	-0.787429	1	-0.633179	1
chr1.6271633.6272585	-0.303834	1	-0.453583	1	-0.214136	1	-0.20048	1
chr1.6282216.6283631	-0.40754	1	-0.342797	1	-0.477705	1	0.0863956	1
chr1.6287210.6288404	1.12859	0.428443	0.585425	1	0.754514	1	-0.043559	1
chr1.6306017.6307201	0.086742	1	0.270317	1	0.374989	1	0.20748	1
chr1.6320269.6320929	0.119974	1	-0.657474	1	0.0340471	1	0.256428	1
chr1.6330468.6330959	-0.225233	1	-0.253701	1	-0.617813	1	-0.120717	1
chr1.6358686.6359722	-0.355056	1	-0.581527	1	-0.596159	1	-0.729387	1
chr1.6359860.6360392	-0.628123	1	-0.388113	1	-0.1034	1	0.0214342	1
chr1.6361771.6362318	-0.0647175	1	-0.00211961	1	-0.3797	1	0.173917	1
chr1.6363788.6364254	0.367776	1	-0.285262	1	-0.229623	1	-0.188985	1
chr1.6382419.6383758	-0.0783888	1	-0.486755	1	-0.222879	1	-0.597718	1
chr1.6401436.6402008	-0.186127	1	0.326661	1	0.495739	1	0.261154	1
chr1.6406028.6407007	0.318829	1	-0.450253	1	0.0598155	1	0.0408386	1
chr1.6409820.6410623	0.749237	1	0.412676	1	0.397129	1	0.23565	1
chr1.6417980.6418598	-0.828874	1	-0.189046	1	-0.00545472	1	0.485018	1
chr1.6440451.6442049	-0.252082	1	-0.395645	1	-0.251364	1	-0.0633315	1
chr1.6448103.6448514	-0.959264	1	-0.712783	1	-0.754631	1	-0.0948093	1
chr1.6477805.6478302	-0.912645	1	-0.426178	1	-0.570503	1	0.00662413	1
chr1.6482801.6484347	-1.64685	0.00331662	-1.80299	9.78319e-05	-1.41623	0.0158233	-0.0558037	1
chr1.6486945.6487477	-0.585517	1	-0.632666	1	-0.313895	1	-0.212691	1
chr1.6488769.6489630	-0.314565	1	-0.470941	1	-0.0902683	1	0.14809	1
chr1.6499213.6500114	-0.730486	1	-0.378445	1	-0.290705	1	0.0453091	1
chr1.6538865.6540061	-0.669831	1	-1.80007	0.0026847	-1.40341	0.078675	-0.551692	1
chr1.6546753.6547706	0.696882	1	0.0914081	1	1.11466	1	1.49472	1
chr1.6592638.6593678	-1.59507	0.00321954	-1.89682	4.74059e-06	-1.78041	9.07817e-05	-0.2871	1
chr1.6594382.6595197	-1.28696	0.444848	-0.982458	0.81275	-1.17257	0.528911	-0.888037	1
chr1.6609379.6610066	-1.91109	0.0591483	-1.87179	0.0275202	-1.79673	0.0542524	-0.356299	1
chr1.6654908.6655647	-2.02857	0.000284599	-2.4281	3.99873e-08	-2.22442	3.77732e-06	-0.787237	1
chr1.6657088.6657483	0.887402	1	-0.30089	1	-0.0603393	1	-0.331256	1
chr1.6658106.6658671	-0.161113	1	-0.0225885	1	0.296512	1	0.613127	1
chr1.6678140.6678752	1.0533	1	0.0683213	1	0.806749	1	0.7846	1
chr1.6682393.6682905	-1.07242	1	-1.30319	0.694898	-1.08055	1	-0.0373444	1
chr1.6712989.6713726	-1.71849	0.0526824	-1.27479	0.203554	-1.52208	0.0759534	0.401184	1
chr1.6717205.6718319	0.15448	1	-0.0442571	1	-0.100401	1	0.38823	1
chr1.6728999.6730278	0.593661	1	0.0785004	1	0.439314	1	-0.00808737	1
chr1.6730389.6730613	0.188484	1	0.195621	1	0.334889	NA	0.225537	NA
chr1.6734507.6735674	1.49713	0.0800492	0.841902	0.992283	0.886853	0.908924	0.218839	1
chr1.6751246.6752727	0.208437	1	-0.00213784	1	0.0975276	1	0.374307	1
chr1.6757106.6758008	1.9794	0.0109287	1.29843	0.295356	1.53777	0.116904	0.0838136	1
chr1.6760033.6761778	-0.88223	0.395281	-1.21077	0.010013	-1.00907	0.123703	-0.368473	1
chr1.6769819.6770502	-0.964937	1	-0.0206836	1	0.465696	1	0.314965	1
chr1.6786888.6787546	0.897454	1	1.93207	0.176688	1.46997	0.570609	1.19434	1
chr1.6799079.6799424	-0.647202	1	-0.818348	1	-0.926787	1	0.112436	1
chr1.6799545.6801970	-1.68642	0.000280878	-1.55861	0.00020205	-1.66744	7.41513e-05	-0.466368	1
chr1.6804816.6805806	-0.465416	1	-0.725626	1	-0.490653	1	0.0754677	1
chr1.6809904.6810870	-0.0126488	1	-0.434414	1	-0.042838	1	0.736737	1
chr1.6818076.6818798	-2.25962	0.0110912	-1.87877	0.0182296	-1.56038	0.121533	0.268624	1
chr1.6824162.6824806	-0.571186	1	-0.758253	1	-0.277354	1	-0.451683	1
chr1.6829556.6830674	-0.411338	1	-0.311713	1	-0.289446	1	0.289165	1
chr1.6834345.6835047	0.146132	1	-0.0477575	1	0.0111587	1	1.00788	1
chr1.6855551.6855814	0.29769	1	0.90875	1	0.636022	NA	1.68442	1
chr1.6857957.6858221	0.651184	1	0.560866	1	0.815007	1	0.861247	1
chr1.6858967.6859509	-0.580942	1	-0.862296	0.717898	-0.689554	1	-0.0630885	1
chr1.6862320.6862575	-0.170198	1	-0.224462	1	-0.0688242	1	0.57561	1
chr1.6866022.6867780	0.925615	0.581075	0.0691245	1	0.213282	1	0.268527	1
chr1.6876944.6877543	-1.04173	0.959021	-0.845075	1	-0.397578	1	0.791219	1
chr1.6893148.6893939	-0.694639	1	-1.18852	0.417803	-0.921933	0.924676	0.139178	1
chr1.6905263.6905662	-0.426696	1	0.270889	1	0.414634	1	1.41627	1
chr1.6907114.6908178	-0.831402	1	-0.602181	1	-0.709242	1	0.015349	1
chr1.6927750.6929446	-0.937029	0.734825	-0.774318	1	-0.655774	1	-0.02121	1
chr1.6936301.6936616	-0.310211	1	-0.263754	1	0.509665	1	0.768124	1
chr1.6945832.6946355	-0.232179	1	-0.424519	1	-0.274206	1	0.529883	1
chr1.6959958.6960549	-0.960842	1	-0.768011	1	-0.734945	1	0.941456	1
chr1.6966731.6967801	0.774107	1	0.58389	1	1.33486	0.260877	0.455034	1
chr1.6972697.6973582	3.0311	5.12067e-05	1.87276	0.0554968	2.64897	0.000699779	1.33185	1
chr1.6979133.6980470	0.807985	1	0.55272	1	0.80334	1	0.688359	1
chr1.7000769.7001157	-0.660167	1	0.56039	1	0.245175	1	0.629745	1
chr1.7010180.7010853	-1.02828	0.320083	-0.730497	1	-0.77827	0.872606	-0.363157	1
chr1.7017690.7018278	-0.328954	1	-0.33385	1	-0.0525402	1	0.0336883	1
chr1.7040486.7040920	-0.667871	1	-1.01337	1	-0.53251	1	0.176824	1
chr1.7048693.7049006	2.41849	0.229468	2.69001	0.126313	2.48051	0.21435	1.71974	1
chr1.7086929.7087188	-1.26812	0.261079	-1.28085	0.17733	-1.43521	0.0899178	0.205059	1
chr1.7088184.7089533	-0.727461	0.885131	-0.829339	0.504804	-0.757562	0.767483	-0.498278	1
chr1.7096729.7097083	-0.992318	0.866197	-0.908718	0.964728	-1.16757	0.553478	0.0364099	1
chr1.7104898.7105945	-1.49417	0.00842329	-1.27013	0.0329476	-1.13996	0.116182	0.286365	1
chr1.7111098.7111953	-1.27014	0.0177674	-1.26662	0.00601661	-1.21062	0.018059	0.155786	1
chr1.7112033.7112591	-0.0453205	1	-0.176058	1	-0.182997	1	-0.0105607	1
chr1.7112769.7113771	-1.11534	0.169057	-1.1537	0.080602	-0.864464	0.588342	0.103369	1
chr1.7117809.7118528	0.444169	1	0.787884	1	0.502472	1	0.240836	1
chr1.7125977.7126751	-1.1997	0.427315	-0.939773	0.776639	-0.960651	0.764362	0.109142	1
chr1.7130761.7132793	-0.532775	1	-0.0723017	1	-0.438164	1	0.0444613	1
chr1.7138101.7139850	-0.811715	0.651857	-1.1085	0.0598222	-0.905562	0.357995	-0.160113	1
chr1.7147998.7149119	1.14965	0.420015	0.514348	1	0.686532	1	0.302633	1
chr1.7154858.7156095	-0.239243	1	-0.335625	1	-0.427615	1	0.659837	1
chr1.7158659.7158956	-1.3662	0.891617	-0.274711	1	0.304153	1	-0.185973	1
chr1.7160975.7162477	-0.0316841	1	0.0152825	1	0.0528736	1	0.0837517	1
chr1.7168035.7168725	-0.778935	1	-1.02785	0.582279	-0.676568	1	-0.175187	1
chr1.7170507.7171368	-1.08414	0.427826	-1.62622	0.0104795	-1.57351	0.020585	-0.145051	1
chr1.7172856.7173494	-0.0351215	1	-0.131426	1	-0.244826	1	-0.435241	1
chr1.7199512.7199913	-1.21703	0.589628	-1.27074	0.402574	-1.19831	0.547955	-0.374928	1
chr1.7204663.7205405	-1.0608	0.227359	-1.00414	0.223993	-0.755966	0.902989	-0.465377	1
chr1.7206103.7207439	-0.751111	0.798087	-0.861286	0.386563	-0.590342	1	-0.155865	1
chr1.7218636.7219581	-0.780649	0.858991	-0.852198	0.58818	-0.52355	1	-0.0510133	1
chr1.7243975.7244838	-1.75668	0.164028	-0.871983	1	-0.97171	0.947473	1.11414	1
chr1.7249873.7250663	-0.553965	1	-0.4433	1	-0.443791	1	0.211406	1
chr1.7292854.7293632	1.47467	0.547246	1.09571	1	1.90909	0.201377	1.44429	1
chr1.7313465.7313833	-1.83064	0.114577	-1.2612	0.383327	-2.00612	0.0302075	-1.50351	0.838121
chr1.7315645.7317071	-1.59071	0.00961842	-1.38146	0.0258679	-1.40696	0.0255507	0.292648	1
chr1.7318789.7319584	1.01947	0.912662	0.90863	1	1.19864	0.659102	0.568358	1
chr1.7347305.7348329	-1.1103	0.305766	-1.7398	0.00109115	-1.50536	0.0166501	-0.1809	1
chr1.7371111.7371605	-0.484795	1	0.819396	1	0.664893	1	1.23828	1
chr1.7380823.7381852	-1.21791	0.24929	-1.17804	0.207969	-0.75602	1	0.326247	1
chr1.7397341.7398710	-0.92864	0.330396	-1.31568	0.00401534	-1.05407	0.102154	-0.40953	1
chr1.7428309.7428996	-1.59187	0.101076	-1.2945	0.210011	-1.09578	0.509994	-0.165647	1
chr1.7447433.7448359	0.0483812	1	0.618482	1	0.679464	1	1.45406	1
chr1.7491738.7491978	-1.67125	0.174294	-1.81933	0.0460744	-1.44786	0.25304	-0.748983	1
chr1.7492622.7493076	-1.51688	0.401681	-1.32836	0.468251	-1.35014	0.48459	-0.529848	1
chr1.7494889.7495690	-1.95921	0.00417343	-1.57106	0.0216747	-1.71323	0.0100958	0.127653	1
chr1.7497749.7498701	0.0586603	1	0.0447273	1	-0.233084	1	0.763223	1
chr1.7505853.7506500	1.32274	1	1.52161	0.854301	1.86885	0.579033	1.78161	1
chr1.7507153.7507523	0.00661219	1	0.218903	1	-0.0861689	1	0.500406	1
chr1.7523387.7524117	0.549106	1	0.0818856	1	0.702655	1	0.784421	1
chr1.7534889.7535730	1.1219	0.763349	0.542072	1	1.02531	0.932751	0.879766	1
chr1.7543036.7544084	-1.36912	0.037752	-1.14157	0.10354	-0.832592	0.710804	-0.0284607	1
chr1.7548146.7548882	-0.378017	1	-0.115103	1	0.315465	1	1.38081	0.963361
chr1.7641102.7642050	-0.180206	1	-0.86342	1	-0.515573	1	0.135574	1
chr1.7696324.7696641	-0.595105	1	-0.646343	1	-0.331972	NA	0.265205	1
chr1.7731107.7731909	-0.609938	1	-0.917167	1	-0.843778	1	0.670681	1
chr1.7750480.7751828	0.277588	1	-0.497028	1	-0.361554	1	0.172483	1
chr1.7758463.7759479	-2.12566	3.70715e-05	-2.36536	3.51086e-08	-2.18028	2.41241e-06	-0.912644	1
chr1.7767922.7769877	-0.699772	1	-0.917991	0.798058	-0.559861	1	0.328584	1
chr1.7828812.7829467	1.83044	0.599175	1.59589	0.800062	1.98083	0.510102	2.80579	0.499914
chr1.7879534.7879785	1.00634	1	0.483395	1	0.669782	NA	1.24813	NA
chr1.7891483.7892301	-0.335063	1	0.215436	1	0.715321	1	0.636716	1
chr1.7955314.7956578	-1.77852	0.00313116	-1.31928	0.0474415	-0.879126	0.685246	0.507538	1
chr1.8005941.8006837	1.1043	0.76774	0.473515	1	1.16761	0.682818	0.257975	1
chr1.8018744.8019523	-0.914281	0.884984	-0.614586	1	-0.179677	1	0.31616	1
chr1.8063235.8064161	-2.13723	0.000254699	-2.04684	8.00152e-05	-1.78371	0.00243708	-0.604214	1
chr1.8065190.8066209	-0.0142536	1	0.127342	1	0.184128	1	0.552148	1
chr1.8085744.8086175	-1.9935	0.132428	-1.1619	0.642286	-0.461081	1	0.639817	1
chr1.8134898.8135531	-0.164954	1	0.20839	1	0.321918	1	0.714129	1
chr1.8320404.8320991	-0.262619	1	-0.00324208	1	0.168539	1	0.257619	1
chr1.8410316.8411854	0.25113	1	0.226183	1	0.0963476	1	0.562282	1
chr1.8450431.8451470	-0.742394	1	-0.32322	1	-0.396683	1	-0.337754	1
chr1.8468310.8469664	-1.33816	0.0853069	-1.46319	0.0173744	-1.15144	0.199428	-0.199966	1
chr1.8494090.8494755	-2.53182	0.00392749	-1.206	0.347007	-0.978802	0.76685	0.128888	1
chr1.8496209.8496727	-2.85317	0.000291879	-1.31084	0.195963	-1.41395	0.146577	-0.633279	1
chr1.8551996.8552251	1.19152	1	1.84483	0.486513	0.753684	NA	0.786236	NA
chr1.8570754.8571224	0.478743	1	1.29031	1	0.908666	1	1.29048	1
chr1.8582457.8583665	0.585111	1	0.540826	1	0.556674	1	-0.573621	1
chr1.8586993.8587863	-0.220642	1	0.0878161	1	-0.439834	1	-0.246652	1
chr1.8595143.8596330	0.290778	1	0.0644325	1	0.107759	1	-0.132952	1
chr1.8644127.8644994	0.140617	1	0.942193	1	0.845229	1	-0.133349	1
chr1.8678668.8680004	-0.13277	1	-0.489804	1	-0.13322	1	-0.339489	1
chr1.8685733.8686486	-2.03476	5.09958e-06	-1.90195	9.91796e-07	-1.78542	2.35943e-05	-0.261301	1
chr1.8736200.8736701	-0.0116279	1	0.666475	1	0.870671	1	0.480544	1
chr1.8744324.8745480	-0.798668	1	0.00847699	1	-0.115564	1	-0.277296	1
chr1.8747332.8747686	-1.58949	0.448334	-1.90359	0.127501	-0.980168	1	-0.410744	1
chr1.8760377.8760582	-0.802797	1	-0.51665	1	-0.920429	NA	-0.632339	NA
chr1.8780514.8781693	1.35712	0.291701	1.21324	0.433441	1.34169	0.29742	0.696052	1
chr1.8783663.8783933	0.594186	1	-0.262256	1	0.024782	1	-1.04877	1
chr1.8790717.8791442	-1.86515	0.0366467	-1.89987	0.00880047	-2.24854	0.00152556	-0.698908	1
chr1.8804978.8805405	-2.09624	0.0428506	-1.21292	0.414785	-1.63041	0.110058	-0.22509	1
chr1.8816690.8817753	-0.43872	1	-0.0699907	1	-0.0963751	1	-0.155205	1
chr1.8818220.8818531	-1.79292	0.0321187	-1.6113	0.0250196	-1.28409	0.207332	-0.268028	1
chr1.8842663.8843239	-0.244355	1	-0.642932	1	-0.809572	1	-0.125672	1
chr1.8847490.8848139	-0.939315	0.978129	-0.144167	1	-0.223907	1	-0.404037	1
chr1.8857976.8858439	-1.16554	0.473308	-1.56542	0.0539956	-1.71879	0.0346556	-0.440761	1
chr1.8864903.8865207	-0.139923	1	0.0503903	1	-0.177545	1	0.569825	1
chr1.8866423.8866989	2.38122	0.263708	2.08571	0.417793	2.04859	0.465123	1.93081	1
chr1.8867414.8868285	0.197485	1	-0.15046	1	0.462761	1	-0.0724296	1
chr1.8904536.8905367	-1.24528	0.27734	-0.350441	1	-0.941394	0.705506	-0.0663361	1
chr1.8921342.8922226	-2.1639	0.000128992	-2.06926	3.6212e-05	-2.03341	0.000118557	-0.66208	1
chr1.8933921.8934793	-0.343839	1	-0.022155	1	-0.228775	1	-0.186116	1
chr1.8940684.8941052	0.164943	1	0.698927	1	0.328102	1	0.546129	1
chr1.8944692.8945455	-0.544393	1	-0.438919	1	-0.57719	1	0.0599429	1
chr1.8947182.8948677	-0.405457	1	-0.510538	1	-0.107664	1	-0.338149	1
chr1.8978980.8979561	0.180361	1	0.121294	1	0.0281226	1	-0.0137059	1
chr1.8982336.8983315	-0.369319	1	0.0629198	1	0.579035	1	0.49158	1
chr1.8995141.8995549	-0.378081	1	-0.176621	1	-0.0154606	1	0.641824	1
chr1.8999003.8999330	-0.782145	1	0.537156	1	0.339782	1	0.139988	1
chr1.9024199.9024981	-0.522835	1	-0.0221303	1	0.136178	1	0.0592156	1
chr1.9037702.9039014	1.06645	0.492049	0.34245	1	0.576912	1	0.207819	1
chr1.9065198.9065447	1.11633	1	0.887131	1	0.520299	NA	0.822625	NA
chr1.9090303.9091657	-0.489705	1	0.143533	1	0.161344	1	0.160098	1
chr1.9100850.9101313	-0.884462	0.93171	-0.481123	1	-0.398662	1	0.257344	1
chr1.9125294.9126979	-1.50942	0.0328737	-0.934996	0.545504	-0.574049	1	0.227283	1
chr1.9127395.9128087	-1.45945	0.313775	-0.439404	1	-0.697546	1	-0.342284	1
chr1.9132555.9133296	-0.857545	0.973572	-0.540704	1	-0.973142	0.721865	-0.0290367	1
chr1.9145309.9145979	-0.757378	1	0.343765	1	0.191637	1	0.648024	1
chr1.9149748.9151167	0.0480471	1	-0.00482645	1	0.333426	1	0.26128	1
chr1.9157171.9157634	1.26301	0.634343	-0.113885	1	0.727001	1	-0.383419	1
chr1.9171744.9172989	-0.835474	0.642254	-1.31383	0.00982197	-1.12548	0.0857792	-0.375121	1
chr1.9174503.9174988	-0.0151079	1	0.164313	1	0.0631316	1	-0.129493	1
chr1.9199548.9200246	-0.794971	1	0.830975	1	0.370724	1	0.463526	1
chr1.9207204.9208060	-0.00447164	1	0.301814	1	0.216716	1	0.437133	1
chr1.9208669.9209364	-0.236052	1	0.109684	1	-0.0102972	1	-0.480696	1
chr1.9209955.9210916	0.409734	1	0.373949	1	0.449539	1	0.219475	1
chr1.9216079.9216600	-0.0948799	1	0.338214	1	-0.187261	1	0.0605739	1
chr1.9223353.9223778	-0.515177	1	-0.309221	1	-0.411072	1	0.296657	1
chr1.9248017.9249609	-0.439596	1	-0.271813	1	-0.136735	1	-0.392183	1
chr1.9253894.9254507	-2.30872	0.00203059	-1.37773	0.117811	-1.09594	0.46706	0.064467	1
chr1.9257953.9258381	-0.774696	1	-0.355027	1	-0.408133	1	0.290824	1
chr1.9280592.9280876	-1.30985	0.541766	-0.836982	1	-1.23075	0.566556	-0.141495	1
chr1.9283010.9283628	-0.424519	1	0.357487	1	0.272826	1	0.354464	1
chr1.9289215.9290385	0.0975726	1	0.0797459	1	0.0619233	1	-0.112763	1
chr1.9291010.9291852	-0.337663	1	-0.576157	1	-0.473424	1	0.48624	1
chr1.9297062.9297239	0.359913	1	0.127741	1	0.339505	1	0.768948	1
chr1.9298253.9300412	0.155473	1	0.0178835	1	0.192039	1	0.907433	0.784286
chr1.9300670.9301020	-1.35794	0.0409707	-1.43264	0.00863606	-1.20832	0.0846304	-0.0659536	1
chr1.9367428.9368208	1.6814	0.608264	0.904599	1	1.01072	1	1.72915	1
chr1.9383885.9384264	-0.612044	1	-0.387979	1	-0.0385331	NA	-0.129883	1
chr1.9408084.9408312	0.269868	1	0.562291	1	0.387157	1	0.859986	1
chr1.9458608.9459244	-0.122686	1	0.327953	1	-0.605685	1	0.788434	1
chr1.9465661.9466441	0.212162	1	2.62636	0.0219204	1.64238	0.448787	1.65847	1
chr1.9535364.9536177	-0.830189	1	1.36292	0.475357	-0.373928	1	0.179246	1
chr1.9541088.9541594	-1.21141	0.0886649	-1.43238	0.00548687	-1.02275	0.254952	-0.514586	1
chr1.9544977.9546474	-1.0454	0.101792	-1.39235	0.000399916	-1.1926	0.0129802	-0.76744	1
chr1.9547899.9548474	-0.276301	1	-0.251149	1	-0.311155	1	-1.35855	0.274046
chr1.9549054.9549285	-0.00552781	1	0.163	1	0.0138725	1	-0.0726494	1
chr1.9553984.9554884	0.927326	0.979697	0.264331	1	0.848888	1	-1.12904	1
chr1.9564053.9565260	-1.33559	0.161855	-1.2052	0.195298	-1.42051	0.0697859	-1.82374	0.0311827
chr1.9569945.9570832	0.0500124	1	0.334718	1	0.812407	1	-0.222218	1
chr1.9572746.9573860	-0.168092	1	-0.657744	1	-0.407595	1	-0.12363	1
chr1.9577469.9578747	-0.578419	1	-0.260032	1	0.186755	1	-0.0407711	1
chr1.9586721.9587113	-0.276632	1	-1.5187	0.58156	-0.127284	1	0.0258507	1
chr1.9591544.9592611	-0.365124	1	0.383608	1	0.776352	1	0.668534	1
chr1.9600860.9602908	-0.770699	0.69068	-1.08326	0.0406838	-0.717322	0.872077	-0.170229	1
chr1.9609260.9609817	-0.0404558	1	0.152485	1	0.449186	1	0.858358	1
chr1.9610300.9610822	0.324774	1	0.147642	1	0.620959	1	0.863916	1
chr1.9611499.9612590	0.535376	1	-0.722365	1	0.168386	1	-0.921915	1
chr1.9615285.9615561	0.66544	1	0.636854	1	1.69205	0.734734	1.09431	1
chr1.9615773.9616711	-0.150606	1	-0.13711	1	0.0841637	1	0.524839	1
chr1.9619170.9620175	-0.381853	1	-0.357814	1	-0.198494	1	0.234779	1
chr1.9621292.9622023	-0.311124	1	-0.260315	1	-0.357822	1	-0.111518	1
chr1.9622196.9622859	0.744671	1	0.335478	1	0.740839	1	0.503501	1
chr1.9626964.9627989	-0.111269	1	-0.0431798	1	0.536151	1	-0.305613	1
chr1.9629678.9631412	0.729697	1	-0.030168	1	0.447776	1	-0.597954	1
chr1.9642020.9642417	-0.977038	1	-0.497274	1	-0.420181	1	0.863766	1
chr1.9645596.9646444	0.897434	1	0.483996	1	0.596597	1	1.31446	1
chr1.9648890.9650417	-1.69585	0.00220819	-1.75707	0.000129248	-1.81468	0.000142339	-0.556921	1
chr1.9658930.9659535	0.66441	1	-0.285683	1	-0.170148	1	0.33261	1
chr1.9673066.9674565	0.880015	1	0.652922	1	1.1521	0.830974	1.24622	1
chr1.9696940.9697124	0.13514	1	-0.33903	1	-0.0897389	1	0.203112	1
chr1.9699979.9701318	-0.766291	0.770892	-1.08832	0.0643726	-0.960639	0.223417	-0.415208	1
chr1.9714416.9714860	0.0619021	1	0.627933	1	0.521082	1	-0.0902847	1
chr1.9747628.9748922	-1.26547	0.00885968	-1.414	0.000260062	-1.15752	0.0203671	-0.635085	1
chr1.9753575.9753780	-0.245247	1	-0.938794	1	-0.365173	NA	-0.086034	NA
chr1.9772696.9773750	0.0575127	1	-0.468867	1	-0.238163	1	-0.270102	1
chr1.9783878.9784503	-1.41902	0.263281	-1.68427	0.0443711	-1.36144	0.244054	0.293677	1
chr1.9789878.9790907	-1.0001	0.569016	-0.432897	1	-1.11639	0.315637	-0.0669876	1
chr1.9797389.9799349	0.0543746	1	0.0122862	1	-0.11037	1	-0.0311989	1
chr1.9800465.9801446	-1.42284	0.0129294	-1.07988	0.13854	-1.13601	0.102381	0.346391	1
chr1.9804106.9805481	-0.412425	1	-0.121726	1	-0.194326	1	-0.183525	1
chr1.9806887.9807167	0.171644	1	-0.349965	1	-0.11343	1	0.942404	1
chr1.9812230.9812598	-0.514252	1	-0.366327	1	0.124582	1	0.46571	1
chr1.9815622.9816782	-0.00605703	1	-0.796228	1	-0.108021	1	-0.398931	1
chr1.9822976.9824859	-0.212455	1	-0.57919	1	-0.409251	1	0.263887	1
chr1.9829436.9829705	-1.29717	0.956449	-0.704887	1	0.0864024	NA	0.366505	NA
chr1.9842173.9842650	-0.779747	1	-0.233584	1	-0.498965	1	-0.342011	1
chr1.9847554.9849170	-0.483869	1	-0.63004	1	-0.515542	1	0.441671	1
chr1.9849624.9850341	-0.548389	1	-0.0497843	1	-0.011446	1	0.614704	1
chr1.9851451.9851778	-0.48395	1	-0.59652	1	-0.639385	1	-0.717326	1
chr1.9858974.9859985	-1.55975	0.142439	-0.811741	1	-1.58463	0.0810637	-0.904036	1
chr1.9862267.9862990	-0.482324	1	-0.301455	1	-0.747902	1	0.161291	1
chr1.9868912.9869109	0.548154	1	0.704112	1	0.196609	NA	-0.0493705	1
chr1.9878286.9878715	-0.64187	1	-0.862151	1	-0.574237	1	-0.0891964	1
chr1.9881015.9881318	-2.47704	0.00926456	-1.79213	0.0549662	-1.86188	0.0518273	-0.373542	1
chr1.9882424.9882690	-1.30929	0.883691	-0.951196	1	-0.56573	NA	-1.08411	NA
chr1.9891516.9892354	0.348506	1	0.206886	1	0.134514	1	0.0902744	1
chr1.9898323.9898571	0.855537	1	1.59399	0.814214	1.03185	NA	1.49443	NA
chr1.9902894.9903483	-0.51026	1	-0.855946	1	-0.644139	1	0.117078	1
chr1.9908024.9909506	-0.525732	1	-0.771989	0.679461	-0.549905	1	-0.0619576	1
chr1.9915426.9916377	0.935757	1	1.5623	0.44236	0.896795	1	0.998318	1
chr1.9931927.9932538	-1.35067	0.0854538	-1.71316	0.00129374	-1.4323	0.0288379	0.171033	1
chr1.9933516.9934098	-1.0916	0.533011	-1.15241	0.332254	-1.1038	0.450711	-0.0689025	1
chr1.9936076.9936755	0.541149	1	-0.0635036	1	-0.464574	1	0.345954	1
chr1.9943392.9944647	-0.928328	0.26297	-1.07897	0.0430535	-0.915549	0.244635	-0.418921	1
chr1.9952821.9953796	-1.49884	0.0624236	-1.02158	0.426924	-1.06518	0.388637	-0.5332	1
chr1.9966874.9968815	-0.680217	1	-0.710365	1	-0.905182	0.518255	-0.991748	1
chr1.9983071.9983558	-1.52037	0.189287	-1.38234	0.20088	-1.30022	0.31164	-0.218451	1
chr1.9991541.9992238	-0.862876	1	-0.898481	0.911047	-0.618267	1	-0.168501	1
chr1.9993445.9994366	-1.78485	0.00119297	-1.91635	3.38993e-05	-1.56712	0.00476557	-0.0679907	1
chr1.10001350.10001863	-0.154985	1	0.370521	1	0.421538	1	-0.0906232	1
chr1.10007119.10008171	-0.912995	0.497529	-0.752081	0.90412	-0.944787	0.3763	0.054303	1
chr1.10008634.10009599	-0.173884	1	-0.107043	1	-0.0117997	1	-0.971575	1
chr1.10012785.10013493	-0.387396	1	-0.125677	1	-1.10448	0.811384	-0.640297	1
chr1.10014385.10015034	-1.75171	0.0141247	-0.430184	1	-1.03171	0.424792	-1.14139	0.980185
chr1.10019121.10019818	-0.547276	1	-0.38246	1	-0.475667	1	0.744087	1
chr1.10037761.10038506	-0.083022	1	-0.128217	1	-0.0595273	1	0.34437	1
chr1.10039388.10040547	-0.165991	1	-0.41061	1	-0.235082	1	0.106195	1
chr1.10055524.10056183	-0.720991	1	-0.689019	1	-0.570135	1	-0.318841	1
chr1.10056348.10057021	0.549062	1	-0.0103785	1	0.554348	1	-0.71948	1
chr1.10057519.10058727	-0.759911	1	-0.0768027	1	-0.0549985	1	-0.909301	1
chr1.10067100.10067404	-1.44331	0.265724	-1.70173	0.0496815	-1.39346	0.235211	-0.578785	1
chr1.10071130.10071904	-0.916316	0.638695	-1.05339	0.286676	-0.67444	1	-0.392165	1
chr1.10076209.10076458	1.40976	1	2.70472	0.393063	2.30153	NA	2.80558	NA
chr1.10083798.10084669	-1.07026	0.557428	-0.41447	1	-0.713692	1	0.109544	1
chr1.10087079.10087789	-0.111802	1	0.164636	1	-0.357651	1	-0.569351	1
chr1.10089265.10090035	-0.739122	0.876391	-0.77856	0.688841	-0.650352	1	-0.239385	1
chr1.10093639.10093913	-0.336184	1	-0.412228	1	-0.923488	1	-0.0396891	1
chr1.10095911.10097408	-2.1861	5.94865e-07	-1.56601	0.0004695	-1.83317	1.35693e-05	-0.499696	1
chr1.10101996.10102648	-0.387327	1	0.504899	1	0.221951	1	0.0710195	1
chr1.10105034.10105458	-0.333262	1	-0.137365	1	-0.174486	1	-0.379396	1
chr1.10108728.10109575	0.147731	1	0.916544	0.882898	0.690617	1	0.0902301	1
chr1.10110633.10111313	-2.24444	0.000660208	-1.48781	0.0344008	-1.83927	0.00360303	-1.01006	1
chr1.10112146.10112627	-1.81213	0.0560335	-1.40401	0.145667	-1.95061	0.0123931	-0.483605	1
chr1.10114785.10115101	-0.919241	1	-0.262685	1	-0.627207	1	-0.608585	1
chr1.10115676.10117286	0.360782	1	1.38372	0.0874168	0.956352	0.695106	0.0508012	1
chr1.10126736.10127946	-1.53582	0.00114026	-1.07908	0.0667001	-1.34791	0.00397528	0.0267661	1
chr1.10132716.10134174	0.838199	0.795215	0.712065	1	0.684524	1	0.357128	1
chr1.10139339.10139786	0.613167	1	0.662691	1	0.785223	1	0.754294	1
chr1.10141162.10142673	1.39721	0.0568278	0.476866	1	0.863563	0.813132	-0.201433	1
chr1.10145392.10146016	0.0575003	1	-0.179242	1	0.0339596	1	-0.136122	1
chr1.10150470.10151046	-0.261541	1	-0.325787	1	-0.448071	1	-0.157412	1
chr1.10156844.10158028	-1.43159	0.0153392	-1.52178	0.00186196	-1.55262	0.00192272	-0.0689078	1
chr1.10164358.10166002	-1.22568	0.114343	-1.16958	0.0963052	-1.14976	0.134728	-0.47819	1
chr1.10171433.10172182	-0.420626	1	-0.117152	1	-0.472228	1	-0.343623	1
chr1.10175593.10176405	-1.64629	0.022412	-1.41492	0.0426544	-1.43087	0.0495137	-0.200719	1
chr1.10176942.10177471	-0.259697	1	-0.0373073	1	0.123215	1	0.592491	1
chr1.10192891.10194156	0.065208	1	0.386205	1	0.490493	1	0.196734	1
chr1.10205493.10206151	-0.493322	1	1.56953	0.258715	0.0957372	1	0.366332	1
chr1.10207385.10207854	0.449836	1	0.0929593	1	0.118154	1	0.0573195	1
chr1.10216625.10217711	0.308302	1	-0.033878	1	0.307196	1	0.223455	1
chr1.10227489.10227703	-1.20699	0.544196	-0.602197	1	-0.772547	1	0.0437316	1
chr1.10227988.10228408	-1.24683	0.25896	-0.809579	0.975315	-1.17798	0.272142	0.299304	1
chr1.10228780.10229321	0.243102	1	-0.0520021	1	0.14387	1	0.0755952	1
chr1.10231958.10233953	-0.0484472	1	-0.159812	1	-0.203127	1	0.0767025	1
chr1.10247087.10248157	-1.84857	0.00466386	-2.37127	1.87539e-06	-1.95799	0.000613532	-0.736882	1
chr1.10257168.10257829	-0.967337	0.746241	-1.36511	0.124374	-0.262066	1	-0.40341	1
chr1.10278783.10279905	0.474627	1	0.172351	1	0.377961	1	0.563173	1
chr1.10283014.10283885	-0.544436	1	-0.860254	0.974909	-1.15952	0.444716	0.0587147	1
chr1.10285115.10285825	-0.737616	1	-0.126582	1	-0.239042	1	0.60477	1
chr1.10286560.10287438	-0.464258	1	-0.140573	1	-0.114051	1	0.281007	1
chr1.10306621.10307410	-0.0976828	1	0.681888	1	0.331428	1	0.574607	1
chr1.10321420.10322242	0.371873	1	-0.0667994	1	0.194721	1	0.917254	1
chr1.10327809.10328396	-0.548599	1	-0.64301	1	-0.134482	1	0.440826	1
chr1.10329094.10329615	-0.721022	1	-0.0682447	1	-0.795895	1	0.473471	1
chr1.10337182.10338016	-0.872184	1	-0.465319	1	-0.568467	1	0.356094	1
chr1.10355031.10355638	0.781817	1	0.93038	1	0.931052	1	1.50921	1
chr1.10370620.10371153	-2.59441	9.06602e-05	-2.85019	7.46637e-08	-2.43619	3.32323e-05	-0.784776	1
chr1.10377486.10378835	1.44239	0.273246	1.19513	0.540409	1.39777	0.308883	1.41142	1
chr1.10397847.10398235	-0.411387	1	0.101423	1	-0.270504	1	0.291823	1
chr1.10403697.10404171	-0.372565	1	0.347278	1	-0.315782	1	-0.0551272	1
chr1.10429603.10430398	-1.08326	0.386969	-1.00948	0.419919	-0.840004	0.851516	-0.114383	1
chr1.10452191.10452880	-0.117196	1	0.12831	1	0.414307	1	1.15617	1
chr1.10477316.10478329	3.14112	0.000208732	1.38898	0.494861	2.41681	0.0136602	0.988576	1
chr1.10484028.10484480	1.04443	1	1.01425	1	1.79043	0.327707	1.37487	1
chr1.10486285.10486698	-0.958633	1	1.2674	0.952009	0.710512	1	1.28297	1
chr1.10486981.10487277	0.91407	1	1.48877	0.915395	1.66043	0.786108	1.76402	1
chr1.10488118.10488706	0.509295	1	0.303235	1	0.350875	1	0.813634	1
chr1.10494226.10494835	0.416411	1	1.48382	0.333407	0.495576	1	1.01234	1
chr1.10504588.10505136	2.58019	0.116113	2.40252	0.162001	3.2768	0.0171698	1.96109	1
chr1.10510384.10510971	1.85847	0.183673	0.745643	1	1.8241	0.202525	0.754628	1
chr1.10524544.10526030	0.00432262	1	1.19817	0.21392	0.697058	1	0.939668	1
chr1.10535227.10535843	0.4276	1	0.610226	1	-0.31362	1	0.93966	1
chr1.10544542.10545230	-1.43027	0.178877	-1.74112	0.0153062	-1.55641	0.0656952	-0.328852	1
chr1.10553069.10553816	0.316543	1	0.251114	1	0.815864	1	1.14525	1
chr1.10570424.10571469	-1.1937	0.398829	-1.40908	0.110768	-0.842836	1	-0.00302301	1
chr1.10572653.10573192	-2.31469	0.00548281	-2.09756	0.00311444	-1.2455	0.358125	0.297175	1
chr1.10592562.10592992	-0.591144	1	-0.372399	1	-0.333009	1	0.274299	1
chr1.10595963.10597202	0.6704	1	0.751906	1	1.44283	0.0230281	0.93663	1
chr1.10606918.10607429	-0.772778	1	-0.589311	1	-0.942317	1	0.464931	1
chr1.10633657.10634161	1.11997	0.921923	1.71422	0.268389	1.03168	1	1.40318	1
chr1.10635846.10637930	-0.605313	1	-0.135363	1	0.007336	1	0.947928	1
chr1.10673137.10673872	0.133257	1	1.01403	1	0.988146	1	1.8901	0.831703
chr1.10699623.10701446	0.70986	1	0.120275	1	0.719933	1	0.463716	1
chr1.10708507.10708858	0.797582	1	0.455187	1	0.549165	1	1.32985	1
chr1.10713330.10713547	-0.529744	1	-0.782231	1	0.739621	NA	-0.0359292	NA
chr1.10718642.10721383	-0.367472	1	-0.473446	1	-0.135685	1	0.210491	1
chr1.10725701.10725985	-0.23956	1	-0.193246	1	-0.676884	1	0.905947	1
chr1.10744171.10744708	-0.955162	0.984738	-0.619621	1	-0.286109	1	0.815182	1
chr1.10757087.10757738	-0.6465	1	1.12212	0.56579	0.51863	1	0.590423	1
chr1.10759345.10760187	0.246713	1	-0.0513187	1	0.0523188	1	0.306438	1
chr1.10763803.10764579	2.16124	0.0235114	1.0411	0.90184	1.41756	0.397581	0.892375	1
chr1.10771453.10772835	0.776493	0.924438	-0.0951802	1	0.202679	1	-0.0771081	1
chr1.10777510.10778384	0.259821	1	0.775336	1	1.24661	0.773892	1.4113	1
chr1.10780659.10782141	-0.305142	1	-0.202522	1	-0.0573172	1	-0.238838	1
chr1.10793860.10795244	-1.60271	0.000992812	-1.02889	0.133215	-1.33407	0.00782507	-0.215168	1
chr1.10835489.10836667	-0.171395	1	-0.40274	1	-0.228406	1	0.234435	1
chr1.10836986.10837779	0.094082	1	0.0123917	1	-0.107212	1	-0.117376	1
chr1.10844450.10844731	0.73361	1	0.116436	1	-0.637903	NA	1.0192	NA
chr1.10854696.10855252	-1.10379	0.878318	-1.03582	0.917518	-0.73233	1	0.0356531	1
chr1.10861314.10861876	2.1098	0.55752	1.20853	1	0.517271	1	1.89162	1
chr1.10871215.10872683	1.98886	0.000211059	0.554476	1	1.43921	0.0377082	0.0611151	1
chr1.10874381.10875378	-1.10722	0.328949	-0.722305	1	-0.557464	1	0.0772372	1
chr1.10875790.10876051	-0.94188	1	0.510319	1	0.896997	1	0.807216	1
chr1.10877209.10878107	-0.0256501	1	-0.254923	1	-0.312095	1	-0.4455	1
chr1.10880029.10880727	-1.18639	0.176936	-1.15401	0.136915	-0.401827	1	-0.0506739	1
chr1.10898950.10899783	-0.365169	1	0.0401756	1	0.355902	1	-0.385044	1
chr1.10918599.10919476	-0.556513	1	0.410611	1	0.39541	1	0.508145	1
chr1.10932215.10933209	-0.982768	0.652841	-0.691546	1	-0.683922	1	0.236117	1
chr1.10942401.10943686	1.14333	0.258871	0.991974	0.470788	1.13626	0.249249	0.0208567	1
chr1.10944985.10945771	1.02585	0.896002	0.419657	1	0.597266	1	0.201346	1
chr1.10948862.10949665	0.0191686	1	0.695209	1	0.0413375	1	-0.339143	1
chr1.10954702.10955813	-1.87694	0.000161234	-1.66166	0.00027537	-1.64608	0.000653797	0.00991076	1
chr1.10962663.10963073	-2.44747	0.0124692	-1.57779	0.128289	-1.41782	0.276573	-0.351862	1
chr1.10967157.10967716	-0.844268	1	-0.0961547	1	-0.108409	1	0.614552	1
chr1.10990729.10991427	-1.42779	0.157059	-0.426828	1	-1.26573	0.246715	-1.70442	0.163475
chr1.10992822.10994694	-0.600391	1	-0.370628	1	-0.50234	1	-0.291755	1
chr1.11018395.11019658	-0.329147	1	-0.370994	1	-0.25571	1	0.236389	1
chr1.11026227.11028028	0.352978	1	0.424781	1	0.521329	1	0.744949	1
chr1.11033076.11033870	0.472594	1	-0.190655	1	-0.599476	1	-0.893087	1
chr1.11037392.11038488	-1.5368	0.0103501	-1.47272	0.00474361	-1.38082	0.0189181	-0.0504055	1
chr1.11043871.11046534	-1.30385	0.00640107	-0.74952	0.725212	-1.0989	0.0423538	0.0787061	1
chr1.11065197.11066998	-1.19848	0.0363785	-0.925355	0.258857	-0.981856	0.184199	-0.431575	1
chr1.11090743.11091439	0.0513135	1	1.12256	0.677348	0.51991	1	0.122878	1
chr1.11096996.11097824	0.0112596	1	0.286899	1	0.295054	1	0.452286	1
chr1.11105962.11106981	-1.57417	0.0805479	-0.953835	0.674908	-1.11649	0.410369	0.116533	1
chr1.11111392.11111801	-0.217239	1	0.112129	1	-0.718434	1	-0.04263	1
chr1.11116612.11118166	1.21327	0.403214	0.606904	1	1.31187	0.271515	0.550642	1
chr1.11120275.11121254	1.44018	0.312177	0.658448	1	1.33903	0.418263	0.454879	1
chr1.11123495.11123938	-1.66633	0.101757	-1.31858	0.226957	-1.5654	0.0937602	-0.0700119	1
chr1.11139763.11140699	0.254164	1	-0.166349	1	0.0800834	1	0.0298782	1
chr1.11144465.11145035	1.60881	0.134594	1.46586	0.207899	1.1912	0.556557	0.515851	1
chr1.11147334.11148730	0.208779	1	0.777466	1	0.246727	1	0.234905	1
chr1.11151342.11152226	0.457709	1	0.497594	1	0.546577	1	0.0469086	1
chr1.11168545.11170084	-1.05169	0.493118	-0.764495	1	-0.608696	1	0.165431	1
chr1.11176913.11177301	-0.490962	1	-0.171268	1	-0.676634	1	0.413234	1
chr1.11177562.11178468	-1.45883	0.131646	-0.820078	1	-1.30504	0.198767	-0.944692	1
chr1.11179608.11180458	-1.26665	0.416564	0.193061	1	-0.217258	1	-0.0357613	1
chr1.11181007.11181599	-0.634465	1	-0.673907	1	-0.377323	1	-0.576369	1
chr1.11183370.11183932	-2.15282	8.31325e-05	-1.6593	0.00131286	-1.55549	0.00699221	0.424576	1
chr1.11202494.11203331	-1.98127	0.00036944	-1.49897	0.00758753	-1.47253	0.0143209	-0.219942	1
chr1.11214171.11214829	-0.510839	1	-0.200554	1	-0.126142	1	-0.389754	1
chr1.11216380.11218249	-0.194119	1	-0.0365608	1	-0.0667614	1	0.0490997	1
chr1.11230509.11231857	1.47359	0.09126	1.59526	0.0335245	1.42121	0.115488	0.351948	1
chr1.11233769.11234358	-0.381848	1	-0.452497	1	-0.447447	1	0.17532	1
chr1.11239568.11239895	0.72567	1	0.934016	1	0.0892508	NA	0.386364	NA
chr1.11244238.11244850	-0.0582373	1	-0.139067	1	-0.649049	1	0.0611874	1
chr1.11245070.11245677	-1.02951	0.835639	-0.898114	1	-0.932257	0.980645	0.258014	1
chr1.11246822.11247492	0.222203	1	0.50793	1	0.319897	1	0.445008	1
chr1.11252268.11253249	2.16147	0.00351006	1.26062	0.365919	1.39625	0.241192	0.283689	1
chr1.11265730.11266696	-0.0835022	1	0.148161	1	0.133267	1	0.52627	1
chr1.11268180.11269219	0.697343	1	0.0327378	1	1.05717	0.66702	0.365314	1
chr1.11279754.11281312	-0.408582	1	-0.310413	1	-0.46489	1	0.554635	1
chr1.11293789.11294894	-0.611461	1	0.245547	1	-0.742471	1	0.135726	1
chr1.11320177.11320659	0.951904	1	1.09549	1	1.52297	0.750752	1.92224	1
chr1.11320864.11322039	-0.0485602	1	-0.268769	1	0.0993197	1	0.0736922	1
chr1.11328681.11330531	0.52208	1	0.273455	1	0.539625	1	-0.296225	1
chr1.11352890.11353725	0.810034	1	0.540482	1	0.74501	1	0.751645	1
chr1.11365175.11366157	-2.10408	0.000194672	-1.7822	0.000391463	-1.49361	0.0144755	0.0731677	1
chr1.11383953.11384451	-0.213978	1	-0.0718582	1	0.179384	1	0.450688	1
chr1.11385880.11386309	1.13625	0.988083	0.52237	1	0.904643	1	-0.0234885	1
chr1.11399156.11400076	-0.0441948	1	0.750083	1	0.168005	1	-0.114773	1
chr1.11405375.11407655	-0.394739	1	-0.170391	1	-0.253475	1	-0.547416	1
chr1.11413430.11414973	-0.881672	0.311689	-0.99398	0.0810134	-0.771371	0.599518	-0.149274	1
chr1.11420048.11420419	-0.483194	1	-0.402034	1	-0.047294	1	0.574809	1
chr1.11426729.11428234	0.58774	1	0.918461	0.545218	0.911606	0.5897	0.411172	1
chr1.11430227.11430514	-1.2371	0.662911	-1.04872	0.843096	-0.679666	1	0.377826	1
chr1.11432603.11435152	-0.558578	1	-0.588386	1	-0.506559	1	-0.11958	1
chr1.11442529.11443754	1.14103	0.544753	1.44639	0.157891	1.37205	0.242393	0.486408	1
chr1.11446750.11447300	0.308686	1	2.04935	0.0963384	1.02993	1	0.828021	1
chr1.11450617.11452170	0.385694	1	0.744733	1	0.742895	1	0.0759393	1
chr1.11457522.11459525	0.754003	0.940208	0.150144	1	0.42241	1	-0.633762	1
chr1.11466040.11466806	1.23029	0.525932	1.1144	0.680391	0.903949	1	-0.0189496	1
chr1.11476982.11478864	1.11101	0.289707	0.808422	0.921401	0.907112	0.681121	0.303171	1
chr1.11488867.11489826	-0.0933589	1	0.790882	1	-0.0731113	1	0.277515	1
chr1.11493014.11494343	-0.410772	1	1.31687	0.283239	0.324235	1	0.256804	1
chr1.11507425.11508343	0.723435	1	0.871931	1	1.07745	0.652691	0.413779	1
chr1.11516622.11517765	0.0332798	1	-0.304158	1	-0.0473746	1	-0.086453	1
chr1.11549595.11550379	1.21396	0.759365	1.27161	0.679696	1.71268	0.250046	0.769859	1
chr1.11551210.11551511	-0.692577	1	0.347275	1	-0.675154	1	0.467653	1
chr1.11554068.11554312	-0.787752	1	-0.237785	1	-0.480469	1	0.122569	1
chr1.11559402.11560274	-0.0367948	1	1.37519	0.451463	0.626022	1	0.724294	1
chr1.11564744.11565820	-0.542224	1	-0.307905	1	-0.16069	1	0.147017	1
chr1.11565946.11566701	-1.15361	0.828056	-0.665244	1	-0.382698	1	-0.234246	1
chr1.11566771.11567417	-1.83065	0.0889889	-1.54836	0.11982	-1.20327	0.479535	-0.843572	1
chr1.11573477.11574241	-1.81215	0.0258014	-1.58169	0.0388568	-1.45436	0.100969	-0.44208	1
chr1.11577747.11578484	-0.468975	1	-0.841185	1	-0.289845	1	-0.29647	1
chr1.11579902.11581298	0.75717	1	0.774244	1	1.32196	0.16452	0.394553	1
chr1.11585164.11585543	-0.702513	1	1.2341	0.683939	0.0811711	1	0.0777903	1
chr1.11587871.11588908	0.255534	1	0.428477	1	0.601585	1	-0.0169643	1
chr1.11595183.11596075	-1.8305	0.00434202	-1.12128	0.215132	-0.75002	1	0.310526	1
chr1.11608268.11608754	-1.35239	0.516607	-0.385277	1	-0.51013	1	0.721104	1
chr1.11626943.11627683	-1.10579	1	0.0405426	1	0.584203	1	-0.344557	1
chr1.11638333.11639073	-0.622295	1	-0.632011	1	-0.262361	1	-0.498013	1
chr1.11650016.11650519	0.720105	1	1.25632	0.994009	1.16864	1	0.925938	1
chr1.11652314.11653676	-1.02306	0.498781	-0.66346	1	-0.420767	1	0.576841	1
chr1.11656591.11656935	2.7306	0.0675953	1.53654	0.727404	1.62597	0.663503	0.99486	1
chr1.11657469.11658696	-0.456834	1	-0.349523	1	-0.228938	1	-0.19196	1
chr1.11660185.11660824	0.116566	1	0.101016	1	-0.419401	1	-0.231146	1
chr1.11712294.11713141	-0.49649	1	-0.719884	1	-0.127247	1	0.0047803	1
chr1.11732103.11732440	0.294017	1	0.745317	1	1.62592	0.550006	0.738011	1
chr1.11738206.11738636	0.911699	1	0.579661	1	1.36395	0.408868	0.276331	1
chr1.11739385.11739748	-0.0852277	1	-0.240151	1	-0.979612	1	-0.171959	1
chr1.11739960.11740671	-1.91719	0.000343311	-2.21912	1.91935e-07	-1.91914	6.18798e-05	-0.819498	1
chr1.11740949.11741609	-1.12743	0.282544	-1.39401	0.0295978	-1.03949	0.358	-0.126849	1
chr1.11742226.11742978	1.91922	0.083401	1.52215	0.288221	2.47073	0.00521071	0.671823	1
chr1.11748024.11749226	0.758091	1	0.45689	1	0.265238	1	-0.277432	1
chr1.11750428.11751565	-0.26522	1	-0.156746	1	0.313432	1	0.367369	1
chr1.11765191.11765627	-0.476872	1	-0.14193	1	-0.854862	1	0.265993	1
chr1.11783867.11785277	0.825003	1	0.926409	0.996257	1.72852	0.0777058	0.168416	1
chr1.11788269.11789057	0.182618	1	-0.213185	1	0.213148	1	-0.13855	1
chr1.11793795.11794286	-0.826202	1	-0.122269	1	-0.444183	1	-0.518101	1
chr1.11795181.11796549	-0.47656	1	-0.373472	1	-0.265477	1	-0.571978	1
chr1.11830017.11830693	0.348608	1	1.72498	0.0818475	0.605016	1	0.262585	1
chr1.11835815.11836608	0.152615	1	1.42661	0.293522	0.487102	1	0.477011	1
chr1.11842404.11843413	-0.108063	1	0.612961	1	0.766112	1	0.529318	1
chr1.11873699.11873962	0.353696	1	-0.408051	1	-0.96681	1	-0.21536	1
chr1.11881848.11882747	-0.886483	1	-0.0648517	1	-0.0469254	1	0.416531	1
chr1.11894549.11896438	-0.866311	0.698204	-1.01557	0.294734	-0.642927	1	-0.341056	1
chr1.11912289.11913328	0.599399	1	0.369837	1	0.591526	1	0.575599	1
chr1.11913720.11914206	1.14341	0.916239	1.00915	1	0.886263	1	0.115176	1
chr1.11915858.11916248	-1.1003	1	-1.07442	0.990989	-0.866787	1	-1.12076	1
chr1.11936909.11938009	-2.02725	3.47764e-05	-1.93437	2.80892e-06	-1.94563	8.8675e-06	-0.791296	1
chr1.11938216.11938529	-2.54549	5.78938e-05	-2.35331	3.64125e-06	-2.19937	8.46375e-05	-0.774837	1
chr1.11955922.11956394	-0.366619	1	0.801934	1	-0.131231	1	0.335806	1
chr1.11975271.11975689	0.963969	1	0.955355	1	1.2098	1	0.945284	1
chr1.11977297.11978630	1.6547	0.098193	1.19892	0.481448	2.07985	0.00792702	0.797009	1
chr1.11979171.11979624	-0.813507	1	0.217155	1	-0.0616238	1	-0.079036	1
chr1.11982332.11983108	0.0591748	1	0.463487	1	0.788934	1	0.516459	1
chr1.11987969.11988375	-0.443956	1	-0.112186	1	-0.146841	1	-0.0789366	1
chr1.11989180.11990341	0.0834384	1	-0.227799	1	-0.197927	1	-0.11874	1
chr1.11995986.11996930	-0.682441	1	-0.398899	1	-0.213508	1	-0.110362	1
chr1.12000531.12001105	0.22	1	0.280057	1	0.147627	1	0.0895347	1
chr1.12008887.12009668	-1.60548	0.0558688	-1.03493	0.499406	-0.86251	0.905568	0.0444697	1
chr1.12010348.12011135	-2.02566	0.000541173	-2.01289	6.51691e-05	-1.60828	0.0089639	-0.367532	1
chr1.12025473.12026318	0.358716	1	1.86798	0.0240723	1.32412	0.347125	0.978577	1
chr1.12028177.12028356	-0.688803	1	-0.884002	1	-0.286974	NA	0.167502	1
chr1.12029276.12030161	-0.214273	1	0.196756	1	0.371846	1	0.660469	1
chr1.12031808.12032356	-0.681072	1	-0.962491	0.850581	-0.653323	1	-0.191273	1
chr1.12055655.12056439	0.00936929	1	0.0936721	1	0.377264	1	0.366519	1
chr1.12092116.12093559	1.23274	0.314797	0.848596	0.992839	0.833152	1	0.0844419	1
chr1.12113066.12113839	-0.723926	1	-0.571894	1	-0.193989	1	-0.0540742	1
chr1.12115186.12116141	-1.46258	0.187044	0.216448	1	-0.315368	1	0.556513	1
chr1.12117166.12117672	0.143486	1	1.07384	0.908063	0.514714	1	0.381015	1
chr1.12134455.12134869	0.513153	1	0.755295	1	0.110306	1	0.767788	1
chr1.12147856.12149107	-1.1122	0.400072	-0.842336	0.870812	-0.955162	0.629316	0.982416	1
chr1.12162968.12164106	-1.86164	5.09958e-06	-1.25857	0.00732415	-1.52048	0.000218696	0.129689	1
chr1.12174019.12174694	1.41351	0.731925	2.47679	0.0624744	0.932224	1	1.31918	1
chr1.12180196.12180934	-1.09443	0.714742	-0.751198	1	-0.408506	1	1.20002	1
chr1.12190546.12191317	1.64241	0.133239	0.907627	1	1.40152	0.316644	0.378083	1
chr1.12195379.12196403	-0.154243	1	0.676428	1	0.507743	1	0.631771	1
chr1.12200680.12201207	0.65547	1	0.196902	1	-0.140886	1	0.840937	1
chr1.12224606.12225185	-0.286865	1	-1.0166	1	-0.646869	1	0.114985	1
chr1.12230670.12231403	-1.40765	0.391252	-0.548355	1	-0.405294	1	0.785364	1
chr1.12238323.12238851	0.0926086	1	0.249572	1	0.215383	1	0.977632	1
chr1.12241870.12242367	-0.785344	1	-0.446531	1	-0.138108	1	-0.519763	1
chr1.12275945.12276897	0.505696	1	0.251371	1	0.902468	1	0.452197	1
chr1.12282326.12283171	-0.0588924	1	-0.120916	1	0.0416817	1	0.212621	1
chr1.12285197.12286141	0.942734	0.991171	0.613721	1	0.470635	1	0.377843	1
chr1.12288337.12289040	-1.78858	0.00413692	-2.15734	7.10305e-06	-1.94119	0.00028372	-0.934909	1
chr1.12291939.12292745	0.0865658	1	0.189673	1	0.181118	1	0.533287	1
chr1.12307024.12307552	-0.574033	1	-0.670772	1	-0.488481	1	0.250945	1
chr1.12310175.12311136	-1.09143	0.806667	-0.73125	1	-0.731979	1	0.111116	1
chr1.12319265.12320865	1.35834	0.167327	0.79281	1	1.15388	0.383014	0.488711	1
chr1.12333597.12334649	-1.34781	0.116828	-0.691786	1	-0.912379	0.660729	-0.828515	1
chr1.12345457.12346130	0.18449	1	0.217391	1	0.338721	1	1.00369	1
chr1.12366996.12369045	-0.715329	1	-0.694634	1	-0.360021	1	0.69503	1
chr1.12397951.12398818	-0.910447	0.937355	-0.68207	1	-0.520863	1	-0.884279	1
chr1.12399368.12400018	-2.27043	4.57104e-05	-1.88292	0.000161137	-1.97292	0.000128723	-0.0344518	1
chr1.12405511.12406348	0.160169	1	0.45745	1	0.105678	1	0.612892	1
chr1.12406719.12407562	-1.65153	0.0558852	-0.818587	0.981351	-0.792774	1	0.391702	1
chr1.12409837.12410774	0.333497	1	0.225078	1	0.174638	1	-0.560133	1
chr1.12437564.12438418	0.640591	1	1.76841	0.12274	0.571241	1	0.974933	1
chr1.12452774.12453609	-0.414252	1	0.374563	1	0.740565	1	1.00016	1
chr1.12465029.12465638	-1.1373	0.510216	-1.30452	0.204564	-1.0816	0.539051	0.24935	1
chr1.12475670.12476184	-1.77698	0.0837569	-1.87069	0.0155406	-1.28193	0.324523	-0.17318	1
chr1.12476264.12476923	0.018638	1	1.35199	1	2.42382	0.370185	2.18192	1
chr1.12488467.12489658	-1.84461	0.00323005	-1.64476	0.00347268	-1.49957	0.0199583	-0.317301	1
chr1.12499976.12501079	1.46328	0.0646481	0.620982	1	1.24612	0.211154	0.216707	1
chr1.12504656.12505187	0.599867	1	0.368029	1	0.672488	1	0.283213	1
chr1.12507468.12507935	-1.17112	0.509132	-1.17573	0.389284	-0.941052	0.845827	-0.263683	1
chr1.12508657.12509313	-0.738554	1	-0.632975	1	-0.492015	1	0.327102	1
chr1.12509617.12511045	-0.412125	1	-0.443412	1	0.277952	1	0.212679	1
chr1.12518928.12520385	-0.0933749	1	-0.509957	1	0.155963	1	0.570268	1
chr1.12526323.12527324	-0.694402	1	0.0255618	1	-0.155232	1	0.376295	1
chr1.12528218.12529316	-0.152173	1	-0.323857	1	-0.365551	1	0.816015	1
chr1.12539916.12540291	-1.75705	0.24597	-1.59089	0.228269	-1.16475	NA	0.490512	1
chr1.12540842.12541894	1.735	0.165871	1.48923	0.329649	2.33377	0.0119829	1.38889	1
chr1.12555374.12556827	-0.42598	1	-0.367997	1	-0.175683	1	0.507472	1
chr1.12558697.12559009	-1.15497	0.597175	-1.54994	0.107784	-1.16722	0.514596	-0.368265	1
chr1.12564968.12565600	0.395286	1	0.26508	1	0.548319	1	0.901806	1
chr1.12568131.12569155	-0.0806199	1	-0.193143	1	-0.151583	1	0.103301	1
chr1.12571787.12572841	-1.35615	0.131719	-0.719532	1	-0.956993	0.604759	-0.10209	1
chr1.12576878.12577600	-0.462857	1	0.218777	1	0.486662	1	0.166219	1
chr1.12579937.12580784	1.33962	0.38517	0.932965	0.998693	1.01012	0.881847	0.360683	1
chr1.12587912.12589150	0.989908	0.921355	0.967656	0.973002	1.61325	0.170978	1.7096	0.50306
chr1.12604323.12604735	-0.666198	1	-0.498496	1	-0.0524738	1	0.591055	1
chr1.12619540.12621035	-1.12756	0.331679	-1.14834	0.21779	-0.761755	1	-0.135906	1
chr1.12622946.12623632	-0.561471	1	-0.349181	1	-0.0621249	1	0.208563	1
chr1.12636014.12636904	3.82065	1.43695e-06	2.9285	0.000549163	2.9231	0.0008813	1.30509	1
chr1.12640711.12641530	-1.78567	0.00581993	-1.4049	0.0369777	-1.90257	0.000634016	-1.86331	0.0087459
chr1.12657937.12659076	-1.40096	0.20432	-0.0885655	1	-0.0372803	1	0.635398	1
chr1.12691713.12693592	-0.915638	0.321907	-0.772859	0.664966	-0.658602	1	0.351041	1
chr1.12697635.12698256	0.142428	1	-0.124146	1	0.0999903	1	0.417961	1
chr1.12699115.12699341	0.59912	1	-0.118376	1	-0.26851	1	-0.118834	1
chr1.12701360.12701849	-1.84081	0.0096751	-1.53253	0.0164622	-1.44199	0.048241	-0.453446	1
chr1.12706320.12707102	-0.373196	1	-0.34223	1	0.0889458	1	0.0355503	1
chr1.12708928.12709200	-1.24406	0.678282	-1.48371	0.317938	-1.16595	NA	0.0597952	1
chr1.12712995.12713362	-0.0242444	1	-0.217576	1	-0.0612116	1	-0.115544	1
chr1.12715448.12715781	-1.74771	0.233444	-0.796647	1	-1.0442	0.871606	-0.0985243	1
chr1.12717878.12719236	-0.18146	1	-0.305739	1	0.0686447	1	0.314232	1
chr1.12722548.12722875	-0.761197	1	-1.10129	0.714131	-0.938743	1	-0.040806	1
chr1.12728115.12728969	-0.13667	1	-0.119214	1	0.516731	1	0.656196	1
chr1.12734541.12735587	-0.455182	1	-0.288252	1	-0.453073	1	0.10704	1
chr1.12746247.12747060	0.00300378	1	0.3692	1	0.442082	1	0.607743	1
chr1.12749088.12749611	-0.40004	1	0.165592	1	-0.20438	1	0.901747	1
chr1.12761597.12762001	0.857215	1	1.82516	0.361927	2.20147	0.167539	1.64143	1
chr1.12764146.12765518	-0.0490943	1	0.721037	1	0.120298	1	0.113399	1
chr1.12766631.12767553	0.984767	0.950444	1.66347	0.140857	1.11415	0.772745	1.27337	1
chr1.12770516.12771955	-1.39991	0.0311327	-1.02643	0.250575	-1.01632	0.297815	0.312039	1
chr1.12783768.12786405	-0.0392673	1	0.86244	0.566883	0.940146	0.393667	0.928537	1
chr1.12794863.12796249	-0.604675	1	0.0192132	1	0.578778	1	0.486467	1
chr1.12804643.12806489	0.0618408	1	0.766945	1	0.53155	1	0.30387	1
chr1.12814182.12814630	0.682617	1	0.353945	1	0.806425	1	0.487987	1
chr1.12832815.12833693	-0.467553	1	-0.44728	1	-0.0752248	1	0.150519	1
chr1.12834678.12834901	-0.383439	1	-0.211008	1	-0.242255	1	-0.122012	1
chr1.12835241.12837155	-0.529695	1	-0.492625	1	-0.46175	1	-0.194258	1
chr1.12863909.12865700	0.0536656	1	-0.410028	1	-0.281578	1	-0.148479	1
chr1.12874174.12874740	-1.29176	0.290628	-0.869268	0.894644	-1.06021	0.535032	-0.164523	1
chr1.12875404.12876520	-0.220584	1	0.445125	1	0.192843	1	0.716713	1
chr1.12877350.12878523	1.69449	0.0510714	0.857947	1	1.02488	0.717932	-0.0467784	1
chr1.12880415.12881414	-1.65484	0.00770791	-1.226	0.0934492	-1.47549	0.0163637	-0.345275	1
chr1.12889903.12890621	0.453407	1	0.50387	1	0.570468	1	0.876755	1
chr1.12905180.12906303	-0.913093	0.748299	-0.520338	1	-0.694556	1	-0.0377821	1
chr1.12907204.12908127	-0.0434287	1	1.21978	0.33079	0.196938	1	0.147437	1
chr1.12908414.12908826	-0.461736	1	-0.153287	1	0.0710108	1	0.390365	1
chr1.12920318.12921206	-1.60295	0.0448668	-0.973999	0.56362	-1.14403	0.305829	0.582763	1
chr1.12939121.12939567	-0.513011	1	-0.100996	1	-0.127417	1	1.33194	1
chr1.12942100.12943012	1.47639	0.326582	1.13107	0.739856	1.4404	0.353397	0.475588	1
chr1.12943364.12943599	-0.208638	1	-0.380286	1	0.110861	1	-0.606233	1
chr1.12947171.12948465	0.322446	1	-0.162699	1	0.126039	1	-0.00317653	1
chr1.12949844.12950220	-0.503249	1	-0.0540221	1	-0.356007	1	-0.084543	1
chr1.12952575.12953337	0.335889	1	0.887718	1	0.790069	1	0.136539	1
chr1.12953700.12955107	-0.894071	0.500175	-0.497887	1	-0.869239	0.511553	0.145602	1
chr1.12963922.12965451	1.00923	0.65923	0.690255	1	0.975103	0.731748	-0.698691	1
chr1.12971634.12972094	1.3608	0.446814	0.750167	1	0.838022	1	0.167617	1
chr1.12973059.12974048	0.202024	1	0.249902	1	0.297469	1	1.08539	1
chr1.12974696.12975269	-0.0423154	1	0.471508	1	0.1722	1	0.0168808	1
chr1.12978279.12980037	1.18409	0.248105	1.2164	0.174833	0.812428	0.984518	0.167712	1
chr1.12984334.12986149	0.238733	1	0.290084	1	0.501738	1	0.637128	1
chr1.12990261.12990816	-0.420977	1	0.560372	1	-0.0354172	1	0.671579	1
chr1.12990978.12993243	-0.28484	1	-0.434378	1	-0.313976	1	0.397837	1
chr1.13001842.13002730	0.88313	0.957152	-0.201018	1	-0.0859893	1	-0.506381	1
chr1.13004738.13006010	-0.370759	1	-0.102716	1	0.128588	1	-0.649431	1
chr1.13010575.13011675	-0.688557	1	-0.193579	1	-0.79708	0.97437	-0.13559	1
chr1.13018003.13019351	0.656831	1	1.86659	0.0019932	1.18444	0.298836	0.818054	1
chr1.13033801.13034658	1.01488	0.978114	0.755011	1	0.787672	1	0.670529	1
chr1.13037196.13037671	-0.00331191	1	-0.532978	1	-0.642599	1	0.254382	1
chr1.13042216.13043255	0.377975	1	0.539099	1	0.234862	1	-0.231767	1
chr1.13045426.13046019	0.625183	1	0.396015	1	0.670704	1	1.01822	1
chr1.13049904.13050763	0.400754	1	-0.0359209	1	0.177829	1	0.336262	1
chr1.13052032.13052664	0.301466	1	0.00657749	1	-0.149953	1	-0.366529	1
chr1.13069371.13070081	-1.44491	0.142211	-0.718512	1	-0.27483	1	0.451069	1
chr1.13084069.13084740	-0.411256	1	-0.422192	1	-0.449848	1	-0.247801	1
chr1.13100813.13101340	-0.578236	1	-0.708002	1	0.0074752	1	0.783221	1
chr1.13103397.13104725	0.371712	1	0.567918	1	0.878636	0.758771	0.163385	1
chr1.13117751.13118224	-0.65214	1	-0.751136	1	-0.469642	1	-0.441862	1
chr1.13128124.13128984	-0.0575687	1	0.624009	1	0.492845	1	0.0229883	1
chr1.13134220.13134960	0.691626	1	0.902365	0.724776	0.572078	1	0.548357	1
chr1.13142049.13142845	0.546636	1	-0.27375	1	-0.0379007	1	-0.747801	1
chr1.13142944.13143432	-0.143879	1	-0.0976046	1	-0.0506757	1	0.623397	1
chr1.13146683.13147630	1.00071	0.640114	-0.0442909	1	0.953516	0.737447	-0.108717	1
chr1.13151082.13151858	0.611101	1	0.0411188	1	0.460119	1	-0.024401	1
chr1.13163504.13164626	-0.094628	1	0.785818	1	0.199269	1	0.29958	1
chr1.13171104.13171840	0.545477	1	0.590598	1	0.727913	1	-0.243813	1
chr1.13176575.13177400	-1.73973	0.0476918	-0.802874	1	-0.84518	0.984963	0.62311	1
chr1.13178631.13179243	0.646633	1	0.138229	1	0.123131	1	-0.140428	1
chr1.13183104.13184149	0.610178	1	0.49507	1	0.460669	1	-0.394088	1
chr1.13188214.13189959	-0.624863	1	-0.881408	0.208878	-0.638631	1	-0.166866	1
chr1.13194567.13194745	-1.20361	0.730287	-0.396621	1	-0.85228	1	-1.27487	1
chr1.13194903.13197726	0.274012	1	0.393347	1	0.366289	1	0.699735	1
chr1.13200269.13200675	1.67154	0.713195	1.62625	0.75964	1.73304	0.688552	2.02113	1
chr1.13203594.13205910	0.459839	1	0.313699	1	0.361458	1	0.423275	1
chr1.13214103.13215385	1.71822	0.0241142	1.11438	0.462756	1.30026	0.23679	0.137179	1
chr1.13216094.13216858	0.607896	1	1.51316	0.177812	1.00454	0.877046	0.457971	1
chr1.13217825.13218584	0.467475	1	0.702564	1	0.372734	1	0.382028	1
chr1.13225356.13226191	-0.239194	1	-0.17744	1	-0.215211	1	-0.616249	1
chr1.13227322.13227533	0.00827715	1	0.408112	1	-0.304872	1	0.512145	1
chr1.13228117.13228563	0.24595	1	0.681094	1	0.509909	1	0.538473	1
chr1.13230661.13231790	0.130005	1	0.367949	1	0.255187	1	0.0714381	1
chr1.13234633.13235680	1.36376	0.242142	1.2059	0.390098	1.49077	0.129525	0.280735	1
chr1.13238054.13238928	0.380049	1	0.776308	1	0.627717	1	0.268701	1
chr1.13239998.13240672	0.284436	1	-0.240359	1	-0.010687	1	-0.230438	1
chr1.13244477.13246334	0.0442695	1	0.176068	1	-0.0718333	1	0.593395	1
chr1.13249557.13250060	0.426326	1	0.375319	1	0.733594	1	-0.0137282	1
chr1.13251648.13252030	-0.122959	1	0.458996	1	0.991736	1	0.701042	1
chr1.13255249.13256658	-0.269777	1	-0.123741	1	-0.19958	1	-0.50846	1
chr1.13256754.13258009	-0.673086	1	-0.616512	1	-0.599471	1	-0.076542	1
chr1.13259502.13259851	-0.13871	1	0.32186	1	0.419204	1	0.619043	1
chr1.13261397.13262005	-0.244214	1	-0.0117813	1	-0.267827	1	-0.706744	1
chr1.13262734.13263277	-0.534281	1	0.139947	1	0.0302757	1	-0.193775	1
chr1.13275628.13276735	-0.271647	1	0.467303	1	0.691847	1	0.105847	1
chr1.13281136.13282004	-1.08118	0.199066	-1.55867	0.000628055	-1.5455	0.00164326	-0.441668	1
chr1.13286377.13287670	0.490384	1	0.289402	1	0.254908	1	0.220855	1
chr1.13287930.13288214	-1.01674	0.740583	-1.25048	0.295268	-1.0198	0.692963	-0.61058	1
chr1.13288827.13289719	-1.39953	0.00714188	-1.21852	0.0199372	-1.18586	0.0370625	0.309495	1
chr1.13290164.13290612	0.24027	1	0.039655	1	-0.105388	1	-0.24096	1
chr1.13292737.13293919	0.564157	1	0.743692	1	0.879307	0.703264	0.706889	1
chr1.13295580.13295871	0.35022	1	0.16937	1	0.107999	1	0.127016	1
chr1.13296295.13296745	0.30967	1	0.568008	1	0.332153	1	0.00047523	1
chr1.13299211.13300353	-0.83012	0.754174	-0.418073	1	-0.154322	1	0.127711	1
chr1.13300645.13301003	-0.187352	1	-0.450042	1	-0.387891	1	-0.232268	1
chr1.13304872.13306026	-0.0560354	1	0.00247188	1	0.489822	1	0.477383	1
chr1.13308002.13308770	1.16491	0.490837	1.46155	0.136407	1.44408	0.167303	1.07609	1
chr1.13313368.13315267	-0.737265	0.734524	-0.965462	0.0935515	-0.897689	0.215725	-0.371732	1
chr1.13320253.13320679	-0.592913	1	-0.471369	1	-0.233148	1	0.35211	1
chr1.13326489.13327173	-0.628784	1	-0.570946	1	-0.600622	1	-0.009057	1
chr1.13327225.13327625	-1.13767	0.798068	-1.09129	0.792559	-0.746818	NA	0.0960161	1
chr1.13329536.13329952	0.957143	0.95208	1.07159	0.766137	0.6618	1	0.603817	1
chr1.13333712.13334135	0.721365	1	1.31613	0.553909	0.507767	1	0.201296	1
chr1.13335749.13336277	-0.36036	1	0.385389	1	0.332108	1	0.340142	1
chr1.13341091.13342926	0.478445	1	1.04629	0.306732	0.722596	1	0.362609	1
chr1.13352503.13354044	-0.458186	1	0.399476	1	0.249903	1	0.654411	1
chr1.13357631.13358355	-1.02337	0.512922	-0.981381	0.510539	-1.08604	0.352042	0.618512	1
chr1.13360495.13361388	-1.76869	1.37921e-05	-1.70159	9.54652e-07	-1.572	4.70925e-05	-0.422739	1
chr1.13362327.13362950	-1.20923	0.296162	-0.795245	1	-0.851052	0.905604	0.354029	1
chr1.13366323.13367426	-0.552239	1	-0.842687	0.467573	-0.65063	1	0.0244913	1
chr1.13372075.13374803	0.153518	1	-0.00361689	1	-0.0385454	1	-0.0609785	1
chr1.13388099.13389013	-1.09446	0.664726	-0.119021	1	-0.547313	1	-0.310185	1
chr1.13393187.13393757	-2.07013	0.000987097	-1.86535	0.000583416	-1.87922	0.00110048	0.0975644	1
chr1.13423585.13424209	0.364958	1	-0.313975	1	-0.532455	1	0.000234211	1
chr1.13425509.13427417	0.17956	1	0.182872	1	0.0919926	1	-0.0377469	1
chr1.13427615.13428345	0.0893038	1	0.314292	1	0.707574	1	0.0754658	1
chr1.13437460.13438599	0.264735	1	0.101778	1	0.354245	1	-0.411619	1
chr1.13454389.13455283	-1.46636	0.149334	-1.22049	0.264749	-1.22242	0.30203	0.215867	1
chr1.13466610.13468355	0.340981	1	0.488824	1	0.665694	1	0.116744	1
chr1.13487526.13488501	1.51975	0.228848	0.887191	1	1.21036	0.575656	0.454323	1
chr1.13493654.13495453	0.79779	1	1.43446	0.109997	1.43378	0.126643	0.839088	1
chr1.13500292.13500969	-0.481209	1	-0.548189	1	-0.612507	1	-0.316582	1
chr1.13531278.13533256	0.230115	1	-0.0822055	1	-0.0397043	1	-0.676854	1
chr1.13560891.13562362	2.53911	0.000121146	2.02101	0.00419814	2.03379	0.00512463	0.393993	1
chr1.13563617.13563816	-0.381862	1	0.622428	1	0.221658	1	-0.417578	1
chr1.13567409.13569093	0.176025	1	0.228063	1	0.283447	1	0.155363	1
chr1.13572443.13572790	2.7304	0.241553	3.16749	0.1082	3.5017	0.0623925	2.20981	1
chr1.13573704.13575132	-0.60253	1	-0.378919	1	-0.0654925	1	-0.1628	1
chr1.13576902.13578427	0.508544	1	0.334273	1	0.772386	1	0.0564036	1
chr1.13588882.13590407	-0.621861	1	-0.891935	0.202834	-0.748069	0.661172	-0.260888	1
chr1.13598818.13600365	-0.114362	1	0.814579	1	0.487253	1	0.0467641	1
chr1.13607638.13608366	-0.314647	1	-0.332161	1	-0.838657	1	-0.584047	1
chr1.13614126.13616192	0.363496	1	0.0109547	1	0.181857	1	-0.149837	1
chr1.13619819.13620775	0.162029	1	1.16991	0.447299	0.294987	1	1.02329	1
chr1.13627147.13627983	-0.367943	1	-0.0345257	1	-0.12532	1	0.716505	1
chr1.13636518.13637049	2.22353	0.465814	2.50756	0.30849	2.49935	0.333798	2.36327	1
chr1.13639289.13640110	0.419843	1	0.472893	1	0.745353	1	0.265653	1
chr1.13640313.13641576	1.90879	0.110903	1.9963	0.068062	2.07676	0.0566651	1.19491	1
chr1.13647714.13648334	-0.910794	0.959865	-1.07157	0.619708	-0.488924	1	-1.85965	0.203973
chr1.13649368.13649988	-0.226476	1	0.102	1	0.346286	1	-1.01504	1
chr1.13651406.13652136	-0.727595	1	-0.00502599	1	-0.195701	1	0.51836	1
chr1.13657642.13658114	0.839897	1	1.49258	0.557722	1.52828	0.545709	0.662374	1
chr1.13659472.13661151	-0.204559	1	-0.332238	1	-0.268277	1	-0.0871443	1
chr1.13682729.13683674	-0.971705	0.280812	-1.172	0.029389	-0.996465	0.189266	-0.124556	1
chr1.13697467.13697713	-0.165665	1	0.349783	1	-0.568171	1	0.199198	1
chr1.13698447.13699488	0.178544	1	0.0420224	1	0.407941	1	-0.153225	1
chr1.13706033.13706811	-0.800922	0.68546	-0.961089	0.20868	-0.648962	1	-0.562455	1
chr1.13738227.13739382	-2.32756	3.58439e-05	-2.04755	6.78221e-05	-1.63586	0.00896157	-0.212213	1
chr1.13752115.13753203	-0.910349	0.426808	-1.65446	3.70444e-05	-0.887531	0.437367	-0.732638	1
chr1.13755500.13756286	0.201265	1	-0.147671	1	0.2126	1	-0.0878345	1
chr1.13774857.13775848	1.36318	0.537469	0.978654	1	1.13627	0.848614	0.588927	1
chr1.13779003.13779429	-0.841253	1	0.126358	1	-0.254546	1	-0.351633	1
chr1.13783779.13784158	0.497648	1	0.821889	1	1.8019	0.629096	0.66724	1
chr1.13784410.13785082	0.0584194	1	0.0224734	1	0.0865308	1	0.0665015	1
chr1.13788879.13790072	-0.484734	1	-0.506741	1	-0.231771	1	-0.149742	1
chr1.13801497.13802310	0.218691	1	0.663886	1	0.859899	1	0.896198	1
chr1.13834571.13835681	-0.926138	0.839426	-0.703861	1	-0.0759433	1	0.168459	1
chr1.13839911.13840411	0.326871	1	0.0958907	1	0.208974	1	0.114026	1
chr1.13843776.13844665	-0.46428	1	-0.132468	1	-0.547766	1	-0.223171	1
chr1.13848650.13849783	0.115455	1	0.106712	1	0.0551529	1	0.458496	1
chr1.13849946.13851470	-0.844148	0.853965	-0.937229	0.567497	-0.884954	0.730164	0.114039	1
chr1.13861012.13861366	-2.07032	0.0867228	-1.15623	0.614345	-1.30782	0.460684	-1.43005	1
chr1.13864280.13865526	-0.898599	0.893653	-0.479323	1	-0.458156	1	0.336634	1
chr1.13870214.13871696	-0.0061623	1	-0.183512	1	0.215364	1	0.0927279	1
chr1.13914081.13915303	0.430834	1	0.33525	1	0.557161	1	1.06287	1
chr1.13925843.13927211	0.282197	1	0.243334	1	0.765818	1	0.940483	1
chr1.13935842.13936866	0.821293	1	0.355561	1	1.08457	0.501042	0.186448	1
chr1.13938211.13939549	0.194768	1	0.485484	1	0.326966	1	0.930658	1
chr1.13953668.13954100	0.860892	1	0.430862	1	0.0213092	1	0.96875	1
chr1.13979129.13980068	-1.88177	0.000103685	-1.97146	5.32654e-07	-1.69314	0.000186749	-0.427124	1
chr1.13991321.13991878	-0.450171	1	-0.569476	1	-0.208398	1	0.744431	1
chr1.13992488.13993394	-1.48848	0.0218403	-1.56493	0.00266803	-1.16081	0.136517	0.220115	1
chr1.13997728.13998879	-1.28406	0.0857815	-1.58774	0.00220758	-1.37253	0.0280269	0.226687	1
chr1.14008841.14009940	-0.485555	1	-0.708425	1	0.0589176	1	-0.0956563	1
chr1.14011152.14012147	2.67605	0.00161091	1.29859	0.53622	2.09358	0.0366192	1.03047	1
chr1.14016624.14017274	-1.37046	0.0966493	-1.11344	0.244232	-0.953084	0.568181	-0.266225	1
chr1.14041447.14042358	-1.13663	0.455061	-0.773559	1	-1.16497	0.352715	-0.131314	1
chr1.14074885.14075750	-2.00113	0.00290363	-2.28617	1.25893e-05	-1.72913	0.00772271	-0.234736	1
chr1.14100419.14101464	-1.9428	5.01308e-06	-2.00563	1.84836e-08	-1.81243	4.00631e-06	-0.308059	1
chr1.14101905.14102425	0.368967	1	-0.492532	1	-0.565804	1	-0.15701	1
chr1.14108104.14109762	-0.242734	1	-0.227715	1	-0.497586	1	-0.927141	1
chr1.14120766.14121675	-0.739936	1	-1.17361	0.423805	-0.875858	1	-0.360254	1
chr1.14124852.14125695	2.24816	0.00451289	0.945449	0.962725	1.67073	0.103043	0.38179	1
chr1.14126162.14127084	-0.128088	1	0.0597609	1	-0.022692	1	0.106144	1
chr1.14129062.14130434	-0.424205	1	-0.661996	1	-0.287223	1	-0.413341	1
chr1.14140953.14141410	-2.09537	0.0598177	-1.23753	0.418	-0.945297	0.936821	-0.691496	1
chr1.14144070.14144684	-0.521697	1	-0.756148	1	-0.347183	1	-0.187165	1
chr1.14150533.14151732	-0.616481	1	-0.707815	1	-0.519439	1	-0.616388	1
chr1.14162366.14163629	0.162551	1	0.105863	1	0.299768	1	0.195167	1
chr1.14164913.14166237	1.70429	0.0111434	0.789683	1	1.11035	0.381057	0.282552	1
chr1.14176473.14177411	-1.84063	0.0013689	-1.54574	0.00383438	-1.43965	0.01696	-0.170846	1
chr1.14180223.14180802	-1.61259	0.0679312	-1.94758	0.00229449	-1.98337	0.00329171	-2.1277	0.00957696
chr1.14181448.14182317	2.10403	0.000183993	1.37058	0.0758688	1.18988	0.243534	-0.0597073	1
chr1.14184125.14186308	-0.219065	1	0.205975	1	0.541878	1	0.00993867	1
chr1.14190058.14190708	-1.09472	0.961516	-0.781818	1	-0.234569	1	-0.604179	1
chr1.14192444.14193344	-0.707444	1	1.26893	0.301982	0.666489	1	1.09285	1
chr1.14198790.14199865	-0.396465	1	0.0549053	1	-0.0333451	1	0.102866	1
chr1.14201534.14202614	-0.926543	0.74294	-0.79238	1	-0.322656	1	0.245593	1
chr1.14204030.14205052	-1.07757	0.363441	-0.966992	0.4629	-0.238353	1	0.261189	1
chr1.14207971.14209173	-0.182651	1	0.0170654	1	0.598435	1	0.182992	1
chr1.14218493.14219350	-0.705336	1	-0.232036	1	-0.691225	1	-1.02398	1
chr1.14219789.14220756	-0.900475	0.43747	-0.924698	0.302006	-0.903202	0.380523	-0.206795	1
chr1.14225281.14225731	-0.648863	1	-0.472954	1	-0.450128	1	0.160903	1
chr1.14227641.14227966	-1.03289	0.897559	-0.667348	1	-1.02209	0.892563	-0.400738	1
chr1.14229785.14230087	-0.758363	1	-0.976105	0.775061	-0.726563	1	-0.34846	1
chr1.14234048.14234708	-1.69658	0.0190591	-1.72271	0.00661797	-1.55076	0.0314651	0.202263	1
chr1.14236031.14236522	-0.963424	0.919549	-0.689759	1	-0.281534	1	0.0548196	1
chr1.14244316.14245392	-1.61536	0.0685548	-0.431361	1	-0.815281	1	-1.17238	1
chr1.14248188.14249058	0.0578134	1	-0.00419721	1	0.105239	1	0.662907	1
chr1.14252678.14253348	-0.971567	0.844445	-0.131198	1	-0.466011	1	-0.230942	1
chr1.14253911.14254375	-0.166918	1	-0.116526	1	0.311021	1	0.233911	1
chr1.14261470.14261737	-0.658609	1	-0.776504	1	-0.172831	1	-0.737978	1
chr1.14263251.14265843	-1.33986	0.0338634	-1.52535	0.00165322	-1.2561	0.0427609	-0.570017	1
chr1.14267765.14268699	-0.533811	1	-0.562776	1	-0.0292911	1	-0.126728	1
chr1.14271714.14272444	0.263809	1	2.4177	0.00646904	1.03303	0.971852	0.971604	1
chr1.14274034.14274953	0.421208	1	0.719913	1	0.645855	1	0.418027	1
chr1.14288003.14288977	-0.189027	1	-0.253444	1	-0.408605	1	0.298423	1
chr1.14291901.14294753	0.323889	1	0.410271	1	0.458708	1	0.141576	1
chr1.14303307.14303884	0.00876936	1	-0.721187	1	-0.170866	1	-0.347283	1
chr1.14304030.14305000	-0.753676	1	-0.927488	0.593425	-0.694615	1	-0.134792	1
chr1.14309359.14310626	-0.797872	0.648187	-0.672464	1	-0.404165	1	-0.222488	1
chr1.14359626.14360800	0.848603	1	0.283224	1	0.952219	0.883879	0.254213	1
chr1.14370011.14371518	0.859414	1	1.70373	0.036817	1.15558	0.502085	0.764736	1
chr1.14384366.14385550	0.727419	1	0.648611	1	1.05666	0.939488	1.40273	1
chr1.14455782.14457393	0.52275	1	0.0124378	1	0.235838	1	0.97361	1
chr1.14460429.14461565	1.64876	0.0680569	1.60486	0.0678369	1.25911	0.359179	0.911614	1
chr1.14484273.14485113	-2.23187	0.000253245	-2.07502	0.000164783	-1.4989	0.0428068	-0.365437	1
chr1.14505994.14507618	-0.432883	1	-0.148811	1	-0.224645	1	-0.140846	1
chr1.14544601.14545007	-2.80075	0.00329408	-0.879183	0.967604	-1.23847	0.387889	0.218804	1
chr1.14552251.14553194	-0.629049	1	-0.0628875	1	0.455446	1	1.10876	1
chr1.14555822.14556685	0.0884771	1	-0.469974	1	-0.35765	1	0.182903	1
chr1.14570094.14571390	0.0498649	1	0.000106031	1	0.0896272	1	-0.175152	1
chr1.14579415.14579761	-0.986036	1	-0.74814	1	-0.967531	1	-0.438852	1
chr1.14584869.14585755	-0.97445	1	-0.513945	1	-0.26531	1	0.812109	1
chr1.14590780.14591425	-0.248233	1	-0.369149	1	-0.129498	1	0.56319	1
chr1.14596004.14596324	-1.07379	1	-0.987073	1	-0.592332	NA	-0.329292	1
chr1.14626754.14627587	-0.580181	1	-0.334026	1	0.16276	1	0.529785	1
chr1.14630405.14631169	-0.401861	1	-0.369502	1	0.11307	1	0.462087	1
chr1.14635601.14636531	-0.0925562	1	-0.227382	1	-0.259709	1	-0.0166062	1
chr1.14637840.14638416	0.272608	1	0.244139	1	0.556338	1	0.265081	1
chr1.14646418.14647435	0.397785	1	0.640111	1	0.767481	1	0.949622	1
chr1.14669223.14669832	0.369151	1	0.353834	1	0.486405	1	0.441212	1
chr1.14675115.14675924	-0.142401	1	-0.30015	1	0.13575	1	0.616148	1
chr1.14681490.14681989	0.76384	1	2.44654	0.0235725	1.3359	0.693755	1.46158	1
chr1.14685175.14686070	-0.380411	1	-0.0244794	1	0.0966616	1	0.670023	1
chr1.14686098.14686497	-0.454861	1	0.57057	1	-0.00267621	NA	0.94349	NA
chr1.14686669.14687795	1.59986	0.224732	1.13199	0.73125	1.52093	0.272658	-0.26182	1
chr1.14700418.14700892	-0.295268	1	-0.0266214	1	0.397144	1	0.262369	1
chr1.14701576.14702920	-0.159163	1	-0.403441	1	0.339869	1	0.195238	1
chr1.14704921.14705672	-0.45809	1	-0.631233	1	-0.0977627	1	-0.25933	1
chr1.14709877.14710867	0.619368	1	1.17163	0.582384	1.05881	0.794787	0.81271	1
chr1.14729085.14729558	-0.289938	1	-0.241581	1	-0.105341	1	0.278885	1
chr1.14738341.14738750	0.196004	1	0.225181	1	0.129688	1	-0.223069	1
chr1.14739712.14740675	-0.357395	1	-0.651317	1	-0.467706	1	-0.384811	1
chr1.14744211.14744870	-0.3395	1	-0.13611	1	-0.24854	1	0.168549	1
chr1.14754930.14756476	-0.0665054	1	-0.0147843	1	0.230235	1	-0.0118736	1
chr1.14757599.14758328	0.38668	1	0.880623	0.934171	0.359351	1	0.079625	1
chr1.14766904.14767109	0.0215828	1	0.832745	1	0.209461	NA	0.802068	1
chr1.14775135.14775825	0.965264	1	1.0503	0.951331	1.14548	0.830399	1.35232	1
chr1.14816106.14817321	-0.0723854	1	0.292588	1	0.38171	1	0.983597	1
chr1.14823245.14823733	-0.189238	1	-0.676837	1	-1.01136	0.93718	0.00705857	1
chr1.14846897.14847758	-2.03177	0.00224403	-1.95598	0.000571903	-1.90565	0.0018753	-0.120187	1
chr1.14857807.14859169	-0.959109	0.480305	-0.618062	1	-0.0210885	1	0.326584	1
chr1.14862062.14862868	-0.296941	1	-0.00798533	1	-0.21478	1	-0.0952868	1
chr1.14869512.14870822	-0.363208	1	0.608367	1	-0.257017	1	0.415468	1
chr1.14899757.14900280	1.36004	0.452387	-0.102038	1	0.694404	1	0.101371	1
chr1.14904055.14904773	-0.384113	1	0.150983	1	-0.0680422	1	0.839957	1
chr1.14918003.14919657	0.504715	1	0.549829	1	0.670527	1	0.426258	1
chr1.14979764.14981307	0.0423009	1	0.111651	1	0.105928	1	0.386087	1
chr1.14995159.14996032	-0.255534	1	-0.0584202	1	0.0479765	1	-0.052619	1
chr1.14997734.14998810	-0.533454	1	-0.820871	1	-0.711916	1	-0.138779	1
chr1.15007332.15008165	-0.614851	1	-0.875559	0.579934	-0.425557	1	-0.273811	1
chr1.15011643.15012156	-0.0331579	1	0.171111	1	-0.165197	1	0.0709193	1
chr1.15026762.15027021	0.190459	1	0.768255	1	1.05073	NA	1.28911	NA
chr1.15030985.15031351	-0.879226	1	-0.582886	1	0.448416	1	0.885443	1
chr1.15055910.15056779	-0.409716	1	-0.0371599	1	-0.359094	1	-0.000135517	1
chr1.15059489.15060203	0.152219	1	1.60365	0.250046	0.951341	1	0.941871	1
chr1.15104284.15105024	-0.0973275	1	0.268858	1	-0.227157	1	0.728611	1
chr1.15105774.15106309	1.19849	0.828579	1.37872	0.6058	0.872501	1	1.23507	1
chr1.15142604.15143187	1.58646	0.78603	1.6304	0.761162	1.62735	0.782181	2.24051	1
chr1.15154513.15155742	0.0250549	1	-0.605218	1	-0.0233747	1	0.331449	1
chr1.15179573.15180652	-2.04186	0.00031002	-1.85208	0.00022404	-1.63851	0.00431944	-0.385911	1
chr1.15181728.15182348	-1.57308	0.0787514	-1.31674	0.134287	-0.920261	0.771229	-0.274349	1
chr1.15241875.15242753	1.78929	0.398341	1.40139	0.755499	1.60487	0.566769	1.68969	1
chr1.15250469.15251019	1.74272	0.442088	2.15941	0.164787	1.59546	0.583284	1.16875	1
chr1.15286110.15288056	-0.00413478	1	-0.064658	1	-0.0224752	1	-0.0114003	1
chr1.15289387.15289600	-0.859167	1	0.0857692	1	0.190913	1	0.304757	1
chr1.15292389.15294679	-1.53527	0.000433065	-1.1168	0.0333388	-1.02181	0.110486	-0.0420556	1
chr1.15296359.15296922	-0.373555	1	-0.261685	1	-0.414518	1	-0.144815	1
chr1.15307021.15308120	0.289457	1	-0.145905	1	0.324518	1	-0.0688131	1
chr1.15317273.15317524	-0.994878	1	0.569501	1	-0.633199	1	-0.150357	1
chr1.15327033.15327654	0.150743	1	0.209936	1	0.454143	1	0.495449	1
chr1.15333951.15334236	-0.2151	1	0.301786	1	0.582986	NA	0.319761	NA
chr1.15334482.15335276	0.19621	1	0.218513	1	-0.189008	1	-0.017963	1
chr1.15336826.15337585	2.60765	0.00304118	1.36761	0.469671	1.76352	0.155022	0.990938	1
chr1.15343716.15344628	-0.403453	1	0.0973064	1	-0.164671	1	-0.14822	1
chr1.15352879.15353508	0.226181	1	1.07788	1	0.561244	1	0.521224	1
chr1.15357908.15358901	-1.93667	8.33529e-10	-1.79771	6.65516e-11	-1.64483	5.4685e-08	-0.453869	1
chr1.15367278.15367513	-0.164931	1	0.816706	1	0.0765582	1	0.807356	1
chr1.15383119.15384182	1.69572	0.175636	1.84255	0.0865153	1.74113	0.145768	0.727708	1
chr1.15388900.15389819	-0.414299	1	0.163492	1	0.00945283	1	-0.97675	1
chr1.15406585.15407276	-1.65115	0.235273	-0.819947	1	-1.13521	0.684223	-0.34846	1
chr1.15408365.15409832	-0.410558	1	-0.194136	1	-0.0626871	1	0.513055	1
chr1.15413529.15414267	0.998896	1	0.92026	1	2.02145	0.176615	1.09873	1
chr1.15417830.15418297	0.310213	1	-0.0827562	1	-0.402178	1	-0.309684	1
chr1.15418426.15419570	-1.22483	0.228142	-0.0441791	1	-0.655241	1	0.496057	1
chr1.15423387.15424719	-1.84731	0.000343374	-1.60703	0.00117342	-1.84409	8.46375e-05	-0.128056	1
chr1.15426666.15427582	-1.6732	0.0399564	-0.387278	1	-0.824295	0.977633	0.0341709	1
chr1.15428499.15429149	0.197807	1	-0.101619	1	-0.14542	1	0.0938348	1
chr1.15434680.15435231	0.97648	1	1.00064	1	0.981957	1	0.462979	1
chr1.15440699.15441527	0.288017	1	1.11694	0.657212	0.478141	1	0.502458	1
chr1.15444200.15445514	0.510833	1	0.179329	1	-0.0826623	1	-0.304065	1
chr1.15445706.15446635	-1.18545	0.199232	-1.12067	0.186134	-1.42566	0.0273882	-0.10519	1
chr1.15451068.15452192	0.227731	1	0.836122	1	0.660804	1	0.240697	1
chr1.15456732.15458071	0.593312	1	1.07446	0.523652	0.771848	1	0.445778	1
chr1.15471412.15472156	0.57345	1	1.45355	0.277104	0.813959	1	1.07057	1
chr1.15474301.15475879	1.37361	0.0833338	0.774113	1	1.10277	0.338085	0.417809	1
chr1.15481182.15481752	-1.29173	0.644298	-0.203803	1	-0.142064	1	0.303346	1
chr1.15482670.15484207	-1.06859	0.0983031	-0.790154	0.610332	-0.821566	0.525029	0.116904	1
chr1.15530888.15531105	-1.57553	0.764126	-0.109024	1	-0.0952775	NA	-0.103264	NA
chr1.15533971.15534555	0.896857	1	1.21416	0.559417	0.78119	1	0.715677	1
chr1.15538760.15539973	-0.795558	0.789087	-0.991084	0.237274	-1.13377	0.099336	-0.199435	1
chr1.15543771.15544885	-1.1867	0.432998	-0.348804	1	-0.244134	1	0.212284	1
chr1.15550306.15551811	0.735214	1	0.993499	0.532351	1.18525	0.241051	0.190077	1
chr1.15557221.15557899	-0.188703	1	0.867598	1	0.397641	1	0.231088	1
chr1.15559006.15560890	0.589014	1	1.05952	0.293294	0.645288	1	0.389119	1
chr1.15563612.15564338	-0.973577	0.864487	-0.227336	1	-0.382209	1	-0.163729	1
chr1.15565600.15567014	-0.0923158	1	1.29881	0.103017	0.235953	1	0.213024	1
chr1.15569797.15571735	-0.434548	1	-0.745601	0.980334	-0.433543	1	-0.278078	1
chr1.15579148.15579692	-0.676905	1	-0.120221	1	-0.195258	1	-0.29276	1
chr1.15579920.15580444	-0.584894	1	0.66631	1	0.428328	1	0.541967	1
chr1.15595183.15596408	-0.478499	1	-0.502244	1	-0.267922	1	-0.476294	1
chr1.15602298.15602561	-2.34042	0.0160367	-1.56151	0.100608	-1.57487	0.127588	-0.382097	1
chr1.15604992.15605942	-1.15297	0.239767	-0.534362	1	-0.177749	1	-0.0293529	1
chr1.15607567.15607874	0.549563	1	0.990657	1	0.748088	1	1.06999	1
chr1.15609452.15609935	-0.946231	0.953092	-0.28849	1	-0.554604	1	-0.758312	1
chr1.15610037.15611401	-1.35468	0.000314265	-1.18416	0.00136029	-1.04292	0.0234099	-0.223012	1
chr1.15615892.15617125	1.99065	0.00538167	1.77399	0.0184068	1.85329	0.0133731	0.780913	1
chr1.15621748.15622608	0.0154666	1	-0.319623	1	-0.106235	1	-0.290184	1
chr1.15624186.15624924	-0.746359	1	-0.535712	1	-0.538615	1	-0.143005	1
chr1.15625004.15625629	-0.647156	1	-0.662516	1	-0.528277	1	-0.395314	1
chr1.15631170.15631498	0.994239	0.930703	0.166949	1	0.301128	1	0.155434	1
chr1.15631884.15632653	0.330181	1	0.485972	1	0.427176	1	0.20201	1
chr1.15634310.15634703	-0.600101	1	0.068539	1	0.198862	1	-0.3804	1
chr1.15636349.15636769	-0.597794	1	1.0971	0.814865	0.383474	1	0.349618	1
chr1.15637835.15638828	-0.224812	1	0.522812	1	0.274771	1	0.572358	1
chr1.15649431.15650145	0.349954	1	0.69195	1	0.707795	1	0.0335352	1
chr1.15651326.15653278	-0.54005	1	-0.339807	1	-0.462531	1	-0.0995458	1
chr1.15656667.15657459	2.2456	0.0114003	1.83269	0.0729821	2.74311	0.000418354	1.08209	1
chr1.15657987.15659016	0.550152	1	1.44409	0.150662	0.848083	1	0.799014	1
chr1.15677034.15678588	-0.634936	1	-0.349424	1	-0.0372752	1	0.052926	1
chr1.15682432.15684305	-0.172152	1	-0.214141	1	-0.202748	1	0.087736	1
chr1.15690818.15691767	0.467944	1	1.96053	0.0261555	0.819398	1	0.579148	1
chr1.15695109.15696803	0.21322	1	0.547992	1	0.611018	1	0.219288	1
chr1.15709004.15709318	0.00457255	1	0.484902	1	0.442008	1	0.489877	1
chr1.15710048.15711444	-0.55769	1	-0.25815	1	-0.247397	1	0.00355177	1
chr1.15712510.15713229	0.146969	1	0.559899	1	0.122804	1	0.786749	1
chr1.15717181.15717880	0.43713	1	0.311496	1	0.743075	1	0.948912	1
chr1.15723294.15724221	-1.61672	0.0354325	-1.36245	0.0662439	-1.2569	0.157988	-0.117017	1
chr1.15725637.15726743	0.176966	1	0.505302	1	0.489187	1	0.872576	1
chr1.15745416.15745708	0.0191935	1	-0.360474	1	-0.564833	NA	0.350751	NA
chr1.15748855.15750261	-0.542023	1	-0.709807	1	-0.487705	1	0.252234	1
chr1.15754911.15755357	1.56516	0.925394	2.16599	0.51491	1.72492	0.847623	1.67186	1
chr1.15770073.15771676	-0.831628	0.928496	-0.379089	1	-0.755455	1	0.0301316	1
chr1.15776787.15777822	-0.316929	1	-0.398592	1	-0.140475	1	-0.195929	1
chr1.15778645.15779131	0.145655	1	0.0739975	1	0.111712	1	0.525089	1
chr1.15791232.15792421	-0.115083	1	0.023442	1	-0.0708833	1	0.139779	1
chr1.15805155.15806469	-0.923454	0.265302	-1.23159	0.00510317	-1.01091	0.0988724	-0.604162	1
chr1.15833232.15833868	-0.729504	1	-0.696553	1	-0.999492	0.767565	-0.844487	1
chr1.15847807.15848415	-0.852324	1	-0.541615	1	-0.376418	1	-0.0417253	1
chr1.15848549.15849708	-1.41433	0.101061	-1.05569	0.388143	-1.2513	0.167725	-0.265195	1
chr1.15850593.15851475	-0.680143	1	-0.240226	1	-0.209142	1	0.162288	1
chr1.15853106.15853904	-0.524388	1	-0.0520073	1	-0.103127	1	0.372578	1
chr1.15874640.15875348	0.830655	1	0.999129	0.905592	1.11537	0.730158	1.0426	1
chr1.15892008.15893199	0.23868	1	0.0828382	1	0.0349297	1	-0.213181	1
chr1.15896512.15896814	-1.66801	0.209654	-1.44954	0.245565	-1.3701	0.365861	-0.326375	1
chr1.15899323.15900466	-0.0745302	1	-0.0929971	1	0.32514	1	0.264562	1
chr1.15902278.15902924	0.116585	1	0.24923	1	-0.0924809	1	0.336736	1
chr1.15912928.15914022	-0.98339	0.745941	-0.57119	1	-1.21465	0.332297	-1.07523	1
chr1.15914119.15915222	-0.497307	1	0.0829343	1	-0.144006	1	0.272707	1
chr1.15926897.15927719	-0.0271331	1	0.0921072	1	-0.0370705	1	0.957753	1
chr1.15936229.15936861	-0.154626	1	0.0450356	1	0.389152	1	0.674911	1
chr1.15942848.15944752	-1.197	0.324492	-1.2204	0.209955	-0.841072	0.942532	0.0701654	1
chr1.15967119.15968097	2.48796	0.0322255	1.74702	0.298245	2.52102	0.0291992	1.58477	1
chr1.15972864.15973320	-0.238738	1	-0.857061	1	-0.778803	1	0.0225086	1
chr1.15990877.15991752	1.21831	0.543546	0.68591	1	1.09494	0.734425	0.648858	1
chr1.15992527.15993084	-0.772116	1	-0.971286	0.811137	-0.464272	1	0.39787	1
chr1.15993351.15994454	0.0949992	1	0.361959	1	0.266569	1	0.429645	1
chr1.16058127.16060268	-0.356841	1	0.749117	1	0.0669938	1	0.162715	1
chr1.16063969.16064796	0.170831	1	0.499992	1	-0.120423	1	0.450178	1
chr1.16079063.16079363	-0.939411	1	-0.743257	1	-0.814575	1	-1.49561	1
chr1.16091747.16092291	1.01075	0.615533	-0.553	1	0.155716	1	-1.02373	1
chr1.16092585.16093851	-0.070638	1	0.00745911	1	-0.011248	1	-1.08392	0.505985
chr1.16103963.16106377	0.135489	1	0.0466821	1	-0.00706967	1	0.0537183	1
chr1.16111587.16112295	-0.549153	1	0.346532	1	-0.163762	1	-0.0103006	1
chr1.16112860.16113948	0.102029	1	-0.152162	1	-0.130746	1	0.187916	1
chr1.16114923.16115625	-0.206032	1	0.0932724	1	-0.147908	1	-0.0760774	1
chr1.16115945.16117067	0.447075	1	1.29973	0.165947	0.590743	1	0.033439	1
chr1.16120356.16121202	-1.75665	0.00030922	-1.49894	0.00132266	-1.51379	0.00182382	0.238618	1
chr1.16122743.16123410	-1.3242	0.29261	0.190016	1	-0.919421	0.857801	-0.975823	1
chr1.16129625.16130772	0.971198	0.865061	1.40555	0.223806	1.51063	0.161004	0.997441	1
chr1.16131659.16131959	-2.11747	0.14359	-0.972671	1	-1.72723	0.222292	-1.24725	1
chr1.16177406.16178556	0.100586	1	0.754214	1	0.48289	1	0.434612	1
chr1.16179056.16180346	0.932052	0.934464	1.39562	0.232714	0.877993	1	0.617005	1
chr1.16187245.16188126	-0.424969	1	-0.672954	1	-0.362694	1	0.669121	1
chr1.16197953.16198562	-1.125	0.50244	-1.05738	0.517968	-1.05198	0.56553	0.975973	1
chr1.16201606.16202422	-0.454917	1	-0.00484367	1	0.203105	1	-0.112643	1
chr1.16215582.16217108	1.20018	0.289673	1.82498	0.00293534	1.37948	0.110084	0.684357	1
chr1.16224020.16225857	-1.51093	0.000634944	-1.36545	0.00113321	-1.33003	0.00307542	0.168842	1
chr1.16227427.16228613	1.53058	0.112856	1.20893	0.377762	1.45269	0.149693	0.523017	1
chr1.16231144.16232724	-0.786025	1	-0.587904	1	-0.46888	1	0.550047	1
chr1.16235821.16238398	0.131896	1	0.991273	0.338795	0.517893	1	-0.205707	1
chr1.16241693.16241953	-1.96643	0.0766885	-1.39094	0.254026	-1.37451	0.316569	-1.0467	1
chr1.16248703.16250983	-0.508818	1	-0.806518	0.751248	-0.732858	1	-0.124292	1
chr1.16253479.16254236	-1.76172	0.00414912	-1.61994	0.00491555	-1.58069	0.00961658	-0.0906328	1
chr1.16255775.16257174	-0.263413	1	-0.245537	1	-0.196666	1	0.241308	1
chr1.16258046.16258974	-1.14214	0.281455	-1.00923	0.405527	-0.918526	0.632934	-0.312791	1
chr1.16259919.16260340	1.1948	0.85775	1.28366	0.750116	0.531764	1	0.316334	1
chr1.16261870.16262499	-0.974126	0.655855	-0.526833	1	-0.730501	1	0.239058	1
chr1.16265781.16266359	-1.21636	0.306602	-1.14454	0.288257	-1.22536	0.2319	0.165777	1
chr1.16266876.16267895	-1.26239	0.140093	-0.750369	1	-1.12652	0.21824	0.253493	1
chr1.16268425.16269584	-0.696593	1	-0.447256	1	-0.68732	1	0.091978	1
chr1.16271684.16272744	1.08335	0.604683	1.21346	0.37345	1.26041	0.336981	0.273374	1
chr1.16274435.16275490	2.24161	0.00377658	1.2596	0.411243	1.61151	0.117405	0.491817	1
chr1.16277915.16278437	-1.40897	0.282297	-1.05051	0.617137	-0.741037	1	-0.120955	1
chr1.16293503.16295298	0.112161	1	0.371123	1	0.123751	1	0.178104	1
chr1.16300271.16300857	-0.0960879	1	1.31247	0.388418	0.849163	1	-0.134824	1
chr1.16304096.16305210	-0.540393	1	-0.283313	1	-0.401779	1	0.408954	1
chr1.16312033.16313490	1.0468	0.617882	0.863021	0.980549	0.891502	0.937126	0.0932065	1
chr1.16330425.16330866	2.32948	0.0475892	1.02481	1	1.75296	0.283116	0.0882157	1
chr1.16334430.16335440	2.25996	0.0305256	1.63312	0.252126	2.2205	0.0332502	0.715378	1
chr1.16336093.16336924	0.899428	1	0.962339	1	0.967142	1	0.871768	1
chr1.16346800.16347600	0.493836	1	1.14189	0.586666	-0.0123477	1	-0.486618	1
chr1.16355841.16357044	0.767654	1	0.943505	0.881067	0.902715	0.983693	0.214748	1
chr1.16361846.16363198	-1.34487	0.0115773	-1.46902	0.000568552	-1.25354	0.0166367	-0.135612	1
chr1.16371983.16372814	-1.6591	0.000882705	-1.09723	0.0913718	-1.18644	0.051467	0.10496	1
chr1.16374502.16375464	-1.41537	0.0260298	-0.934105	0.412039	-1.13743	0.130508	0.395338	1
chr1.16399263.16400224	-0.0727245	1	-0.0120274	1	0.0840931	1	0.30296	1
chr1.16407948.16409592	-0.327976	1	-0.076771	1	-0.0472086	1	-0.053719	1
chr1.16409959.16410734	0.138103	1	0.0478435	1	0.035878	1	0.0991791	1
chr1.16411861.16412321	0.805894	1	1.14874	0.88901	1.07089	1	0.396733	1
chr1.16433476.16433900	-0.543241	1	-0.198017	1	-0.0714888	1	0.315986	1
chr1.16435104.16436238	-1.15373	0.0584086	-1.21723	0.0124942	-1.26813	0.00970034	-0.55024	1
chr1.16440093.16440628	-0.659058	1	-0.460371	1	-0.430252	1	0.0188393	1
chr1.16441974.16442187	0.272086	1	-0.117589	1	-0.265727	1	0.403113	1
chr1.16465550.16467085	-0.304887	1	0.299012	1	-0.0992051	1	0.579974	1
chr1.16468537.16469739	1.09829	0.440559	1.08645	0.428031	1.01246	0.594256	0.0518578	1
chr1.16484390.16485255	0.797957	1	0.867035	1	0.623102	1	0.688681	1
chr1.16485633.16486210	-1.06876	0.392884	-1.05023	0.316312	-1.03067	0.391619	-0.101558	1
chr1.16512599.16513714	-1.69853	0.00361409	-1.31716	0.030961	-1.32211	0.0398455	-0.527919	1
chr1.16518131.16520749	5.50749e-05	1	-0.0526735	1	-0.0981725	1	0.206497	1
chr1.16544946.16545623	1.22185	0.382947	-0.0750155	1	0.167368	1	-1.53387	0.723155
chr1.16546486.16547540	-1.30372	0.0830875	-1.16364	0.107786	-0.93071	0.498114	-1.68719	0.0110651
chr1.16554692.16555259	-0.249818	1	-1.26096	0.42734	-0.488162	1	-0.34163	1
chr1.16559191.16560226	-0.20338	1	-0.0275586	1	-0.339128	1	-0.225129	1
chr1.16564581.16565586	-0.437745	1	-0.0622491	1	-0.506249	1	-0.69099	1
chr1.16565998.16567566	-1.58143	0.00214654	-1.046	0.156311	-1.19306	0.0537269	-0.25966	1
chr1.16575468.16575908	-1.09798	0.827794	-0.52971	1	-0.53687	1	0.145703	1
chr1.16586037.16586493	-1.7604	0.00937528	-1.5141	0.0142243	-1.558	0.0154095	-0.559516	1
chr1.16586672.16588213	-0.610201	1	-0.703379	1	-0.522037	1	-0.0881381	1
chr1.16592342.16592568	-1.38133	0.693788	-0.693392	1	-0.490901	1	-0.837721	1
chr1.16604999.16605930	0.762002	1	0.68511	1	0.618898	1	0.338489	1
chr1.16606628.16607715	0.325782	1	0.28965	1	0.131581	1	0.0298244	1
chr1.16618432.16619901	-0.231651	1	-0.380922	1	-0.294091	1	0.124526	1
chr1.16636162.16637711	1.7431	0.00838472	0.792436	1	0.912605	0.784293	0.100998	1
chr1.16656423.16657683	-0.533819	1	-0.642403	1	-0.440956	1	0.0720795	1
chr1.16664877.16666088	-0.192869	1	-0.144936	1	-0.220626	1	0.00931603	1
chr1.16671364.16672078	0.093091	1	0.00400059	1	-0.0855084	1	0.0293162	1
chr1.16676609.16677483	-1.98919	2.76207e-06	-1.9229	1.04497e-07	-1.76528	9.07332e-06	-0.253731	1
chr1.16678763.16679525	0.383642	1	0.380485	1	0.276684	1	-0.157354	1
chr1.16683741.16684185	0.504917	1	0.137266	1	0.306186	1	-0.508732	1
chr1.16687907.16689988	0.19949	1	0.205631	1	0.192453	1	-0.293552	1
chr1.16696562.16697145	-1.62511	0.121188	-0.808467	1	-0.87087	0.989727	0.345792	1
chr1.16700024.16700558	1.87431	0.607146	2.3046	0.325846	2.66857	0.18716	1.44635	1
chr1.16702697.16704605	0.924404	0.865083	1.3147	0.222461	0.856167	1	0.615541	1
chr1.16717807.16718548	-0.558969	1	0.309841	1	0.3744	1	1.03994	1
chr1.16734827.16735655	-1.45059	0.155121	-1.24837	0.220528	-1.05706	0.53276	0.013295	1
chr1.16745555.16746682	-0.362537	1	-0.545179	1	-0.565753	1	-0.350022	1
chr1.16748692.16749421	-0.384709	1	-0.132969	1	-0.268832	1	-0.173587	1
chr1.16758747.16759841	-1.15604	0.450291	-1.05719	0.520785	-0.830294	1	-0.114998	1
chr1.16768189.16768740	0.421928	1	0.39013	1	0.0245857	1	0.993986	1
chr1.16798006.16799123	-0.00389807	1	-0.109086	1	0.105973	1	-0.0417491	1
chr1.16809355.16810431	-0.954337	0.890706	-0.69098	1	-0.12761	1	0.474273	1
chr1.16811095.16811443	-0.559119	1	-0.0985992	1	-0.1872	1	-0.16795	1
chr1.16815803.16817056	-0.179629	1	-0.346036	1	-0.0598353	1	0.101746	1
chr1.16821041.16821632	-0.722256	1	-0.860884	1	-0.493486	1	-0.00924628	1
chr1.16846441.16847015	-0.81133	1	-0.157739	1	0.248718	NA	1.4337	1
chr1.16868255.16869072	-1.19944	0.365097	-1.44424	0.0800747	-1.48276	0.0784195	0.135203	1
chr1.16904772.16905331	1.02052	1	2.36665	0.0425466	1.29281	0.779219	1.49522	1
chr1.16916387.16917641	0.128428	1	-0.278456	1	0.163002	1	-0.0634593	1
chr1.16929064.16930947	0.527512	1	1.09385	0.454915	1.68451	0.0204315	1.29046	0.854684
chr1.16934302.16935354	-0.288556	1	-0.790212	1	-0.308244	1	-0.0722436	1
chr1.16957803.16958459	0.159162	1	0.69246	1	0.693113	1	0.715521	1
chr1.16964324.16965217	-1.28659	0.325307	0.270272	1	0.414342	1	-0.132085	1
chr1.16979495.16980622	-0.478125	1	-0.57061	1	-0.16992	1	-0.0987043	1
chr1.16981587.16982361	-0.522401	1	-0.415588	1	0.225805	1	0.518844	1
chr1.16987135.16988350	-0.160882	1	-0.171155	1	0.218857	1	0.126702	1
chr1.16996579.16997400	-1.00936	0.907173	-1.03006	0.811472	-0.571249	1	-0.398848	1
chr1.17001832.17002372	-0.629655	1	-0.990605	0.843219	-1.11229	0.679569	-0.371944	1
chr1.17003022.17003829	0.643414	1	1.58946	0.338699	1.49272	0.457933	0.897053	1
chr1.17007737.17008908	-0.759127	1	-0.834036	0.945934	-0.6877	1	-0.789518	1
chr1.17009000.17011243	-1.49636	0.0107041	-0.637484	1	-1.1012	0.153949	-0.937097	1
chr1.17015708.17016970	1.19051	0.528219	0.629771	1	1.04082	0.772707	0.674357	1
chr1.17023256.17025278	0.505341	1	0.225663	1	0.44129	1	0.428654	1
chr1.17033365.17035010	0.529608	1	-0.0026912	1	0.104094	1	-0.0761213	1
chr1.17041196.17041984	1.24116	0.398534	0.711999	1	0.923057	0.942082	0.0403189	1
chr1.17042819.17043842	0.494335	1	0.590272	1	0.931533	0.932943	0.138379	1
chr1.17051664.17052020	-0.190246	1	-0.68333	1	-0.584686	1	-0.809243	1
chr1.17053723.17054818	-0.0731021	1	0.00279701	1	0.288866	1	-0.329811	1
chr1.17058763.17061242	-0.0674058	1	-0.332554	1	0.0391995	1	-0.122857	1
chr1.17084807.17085866	0.205466	1	0.32772	1	0.275002	1	0.074194	1
chr1.17087891.17088605	2.39009	0.00247682	0.594521	1	1.43731	0.290026	0.246123	1
chr1.17096587.17098964	-0.5762	1	-0.920693	0.278571	-0.728481	0.892858	-0.28271	1
chr1.17116561.17117741	-1.98985	0.0255974	-1.63745	0.0555167	-1.51859	0.12482	-1.01924	1
chr1.17119806.17120486	1.30707	0.207203	0.702748	1	1.09777	0.47783	0.124265	1
chr1.17120890.17121402	-0.491613	1	0.12623	1	-0.40595	1	-0.204823	1
chr1.17122836.17124000	0.397403	1	0.313699	1	0.425132	1	0.179254	1
chr1.17132092.17132620	1.83274	0.396614	1.1167	1	1.80587	0.423102	-0.226214	1
chr1.17145059.17146435	-0.777669	0.688382	-0.950231	0.185062	-0.747776	0.774088	-0.320944	1
chr1.17154094.17154854	-0.275431	1	0.368204	1	0.0100908	1	-0.126016	1
chr1.17155356.17156196	0.314058	1	0.799655	1	0.496169	1	-0.0876678	1
chr1.17156596.17157276	0.511859	1	0.471943	1	0.301323	1	-0.044026	1
chr1.17163181.17164176	-0.617155	1	-0.739342	0.969249	-0.777297	0.86577	-0.598229	1
chr1.17172265.17173328	-0.0448585	1	-0.545233	1	-0.343238	1	-0.425561	1
chr1.17201671.17202084	-0.614895	1	2.6296	0.111213	0.331109	NA	1.4283	NA
chr1.17302366.17303657	2.28677	0.00250451	1.48381	0.178282	1.99427	0.0152749	0.591518	1
chr1.17304908.17305903	3.36085	2.0108e-06	1.67256	0.118518	2.5329	0.00115113	0.891542	1
chr1.17309639.17310645	0.941634	1	0.490088	1	0.79566	1	1.36874	1
chr1.17311267.17312084	0.119934	1	-0.135559	1	0.175284	1	0.698728	1
chr1.17337018.17338368	0.0639474	1	-1.49983	0.0708019	-0.918436	0.841582	-2.38442	0.00137952
chr1.17363428.17364317	1.326	0.58407	1.58827	0.285687	2.22551	0.0317777	1.60984	1
chr1.17366093.17366680	-2.09271	0.0218938	-1.70045	0.0365896	-1.61745	0.0800091	0.235778	1
chr1.17377255.17378353	0.903045	0.929628	0.611513	1	1.00634	0.750078	0.265771	1
chr1.17406013.17407220	0.905288	0.861755	0.870447	0.939903	0.922102	0.846296	1.21052	1
chr1.17416672.17417299	2.38817	0.00618183	0.856104	1	1.57704	0.236627	0.44041	1
chr1.17421155.17421619	-0.464807	1	-0.467611	1	-0.836557	1	-0.0673501	1
chr1.17426535.17427474	-0.915218	1	-1.18632	0.535428	-0.746857	1	-0.511893	1
chr1.17448638.17449848	-1.36995	0.188768	-0.973717	0.649443	-1.45782	0.0882923	-1.055	1
chr1.17480399.17481599	-0.212389	1	-0.480309	1	-0.187802	1	0.0744621	1
chr1.17485340.17486139	1.2908	0.555206	0.613203	1	0.822735	1	1.40726	1
chr1.17537039.17538504	0.72877	1	0.0724841	1	0.741154	1	0.76624	1
chr1.17544623.17545687	2.58222	0.00304018	1.00299	0.982809	1.64605	0.215219	0.929092	1
chr1.17569893.17570727	1.99441	0.0488927	0.670759	1	1.41408	0.390476	0.408036	1
chr1.17600000.17601507	-0.616132	1	-0.609524	1	-0.189507	1	0.37245	1
chr1.17608454.17609025	-0.383958	1	-0.70192	1	-0.269924	1	0.340451	1
chr1.17629382.17630864	-0.281773	1	-0.518364	1	-0.234683	1	0.323654	1
chr1.17642116.17643234	-0.114526	1	0.048173	1	0.71363	1	-0.0538798	1
chr1.17646686.17647342	-0.703435	1	-1.25892	0.0666609	-1.00458	0.383307	-0.0661809	1
chr1.17664861.17665252	0.371605	1	-0.373905	1	-0.745649	1	0.194311	1
chr1.17688472.17688787	0.0443398	1	0.918864	1	1.06582	1	0.147693	1
chr1.17716356.17716676	0.552507	1	0.177305	1	0.922403	1	0.550013	1
chr1.17717600.17718278	0.89506	1	0.543073	1	0.687173	1	-0.288878	1
chr1.17718404.17719345	-0.288166	1	-0.464548	1	-0.060704	1	-0.660539	1
chr1.17726802.17728400	-0.29028	1	-0.765083	0.782983	-0.387095	1	-0.21907	1
chr1.17735265.17736298	-0.801971	1	-0.234169	1	-0.198811	1	-0.149613	1
chr1.17740550.17741332	-0.525647	1	-0.293538	1	-0.305617	1	-0.0325619	1
chr1.17742013.17742721	0.46821	1	0.300461	1	0.490282	1	0.454138	1
chr1.17746950.17747456	-1.16835	0.72667	-0.903409	1	-0.612965	1	0.184997	1
chr1.17750664.17750915	-1.20715	0.788847	-0.952395	1	-0.794307	NA	0.547482	1
chr1.17753053.17754407	-0.35363	1	-0.155673	1	0.0570494	1	-0.0519147	1
chr1.17754897.17755742	0.147576	1	0.205382	1	-0.0454197	1	0.0532685	1
chr1.17759426.17760385	-1.25063	0.355983	-1.22896	0.283524	-0.75091	1	0.0206778	1
chr1.17762913.17763253	0.230831	1	-1.94751	0.801941	0.226321	NA	0.737888	1
chr1.17805083.17805850	-0.429011	1	-0.08603	1	0.0468611	1	0.257378	1
chr1.17825496.17826275	1.12107	0.822923	0.38572	1	0.962043	1	0.935795	1
chr1.17828411.17829052	0.64643	1	0.474009	1	0.12093	1	0.776072	1
chr1.17838306.17839060	-1.49301	0.0200964	-1.70769	0.000600959	-1.31374	0.0489602	-0.472959	1
chr1.17856505.17858099	1.7231	0.0565097	0.729437	1	1.5802	0.10525	0.492796	1
chr1.17873151.17874349	-0.191919	1	0.180386	1	0.419958	1	0.15772	1
chr1.17891787.17893506	-1.55712	0.00237508	-1.2286	0.0221112	-1.10082	0.0996076	-0.333334	1
chr1.17909929.17910265	0.15172	1	0.443792	1	0.184988	NA	0.620788	NA
chr1.17926214.17926528	-2.14138	0.0873881	-1.59846	0.177459	-1.16012	NA	0.634605	1
chr1.17929462.17930015	1.05269	1	1.27532	0.798798	1.29211	0.798057	1.80387	1
chr1.17935166.17936130	-0.584768	1	0.0150056	1	-0.0984351	1	0.00680028	1
chr1.17949274.17949780	0.583699	1	-0.10288	1	-0.0273804	1	0.0387748	1
chr1.17980497.17981292	-0.260855	1	-0.445992	1	-0.176572	1	-0.0557711	1
chr1.17997089.17998194	1.09437	0.819768	0.635746	1	1.30985	0.527707	0.520061	1
chr1.18009323.18010186	0.423055	1	0.405423	1	0.490237	1	-0.286109	1
chr1.18012781.18013367	0.133923	1	0.230787	1	-0.0978344	1	0.286977	1
chr1.18016326.18016607	2.71571	0.411009	2.40086	0.568792	3.3742	0.189253	2.69403	1
chr1.18025413.18026582	-0.396814	1	-0.413281	1	-0.0050219	1	0.651918	1
chr1.18029843.18030956	-1.43095	0.0237321	-1.25816	0.0500729	-0.910609	0.53493	0.0670279	1
chr1.18039888.18040229	-1.21009	0.384542	-0.977414	0.653785	-1.13385	0.416744	0.120468	1
chr1.18041170.18042062	-1.42827	0.00980964	-1.30219	0.0125611	-1.15982	0.0684989	0.155657	1
chr1.18043719.18044472	-2.00054	0.00147434	-0.932394	0.631831	-1.32687	0.09919	0.480514	1
chr1.18057134.18059286	-0.183593	1	-0.353139	1	-0.190752	1	0.0461831	1
chr1.18105896.18107350	-0.0647589	1	-0.0526946	1	0.0674642	1	0.18346	1
chr1.18116251.18117946	-0.312922	1	0.0987501	1	-0.0169105	1	-0.0526548	1
chr1.18129713.18130414	-1.89444	0.00138275	-2.10788	1.07494e-05	-1.59658	0.0079965	-0.647113	1
chr1.18131106.18132198	-0.15202	1	-0.0719882	1	-0.192386	1	-0.137917	1
chr1.18145637.18146997	-0.273142	1	0.727812	1	0.34344	1	0.536853	1
chr1.18147822.18149184	0.81598	1	0.891341	1	0.749204	1	0.841728	1
chr1.18168105.18168853	0.420005	1	-0.296079	1	-0.0802821	1	-0.256042	1
chr1.18170445.18171070	-0.808119	1	-0.229428	1	0.216898	1	0.724776	1
chr1.18180992.18182002	-1.99006	0.00769659	-2.12959	0.000324254	-1.05739	0.506076	-1.60473	0.218264
chr1.18190674.18192369	-0.186154	1	0.299483	1	0.328893	1	0.394007	1
chr1.18241605.18242384	-0.222625	1	0.395595	1	0.62923	1	0.508702	1
chr1.18270290.18270913	0.176727	1	0.0431192	1	-0.542987	1	0.486243	1
chr1.18288924.18289368	-1.10934	0.689898	-0.271546	1	-0.6496	1	-0.564493	1
chr1.18293624.18294172	0.222757	1	-0.322459	1	0.882003	1	0.76241	1
chr1.18295169.18295752	-0.41639	1	0.0657193	1	0.274685	1	0.746856	1
chr1.18307342.18309046	-0.11886	1	-0.0971097	1	0.310534	1	-0.393047	1
chr1.18313408.18314028	-0.516828	1	0.174701	1	-0.573546	1	0.142586	1
chr1.18315551.18316044	-0.909186	1	-0.441316	1	-0.662919	1	-0.412661	1
chr1.18319451.18321204	0.291205	1	-0.0546699	1	-0.047946	1	0.278803	1
chr1.18333658.18334697	0.921885	1	1.08647	0.922031	1.83431	0.161501	0.819075	1
chr1.18336824.18337865	-1.64285	0.0371797	-1.21621	0.188061	-1.53386	0.0366831	0.0120998	1
chr1.18352882.18354504	0.883352	1	1.27919	0.368845	1.4973	0.176933	1.09573	1
chr1.18359659.18360607	-0.54018	1	-0.624562	1	-0.458532	1	-0.455529	1
chr1.18364472.18364795	-2.09323	0.0396829	-1.44963	0.179766	-1.21015	0.474345	-0.221928	1
chr1.18371449.18372369	-0.834112	1	-0.291331	1	0.264758	1	0.52724	1
chr1.18376989.18378542	-0.164873	1	-0.0407649	1	-0.0826363	1	0.307621	1
chr1.18402408.18403140	-1.46513	0.0678642	-1.71284	0.00325378	-1.62245	0.0122917	-0.120534	1
chr1.18404250.18404872	-1.46469	0.28885	-1.81314	0.0398312	-1.40311	0.273109	-0.954463	1
chr1.18410859.18411194	-0.0131974	1	0.196848	1	-0.187201	1	-0.00767	1
chr1.18412654.18413227	0.0737758	1	0.326345	1	-0.310882	1	-0.181571	1
chr1.18415820.18416885	-2.11507	0.000221592	-1.83782	0.000568552	-1.732	0.00282035	-0.152828	1
chr1.18458854.18459414	0.199825	1	0.832408	1	0.490415	1	0.878209	1
chr1.18463233.18463997	0.247331	1	0.0958193	1	0.169998	1	0.120756	1
chr1.18464136.18465106	-0.690787	1	-0.273473	1	-0.483573	1	-0.360598	1
chr1.18468453.18468885	-0.427511	1	-0.335956	1	-0.0876944	1	-0.238154	1
chr1.18496325.18496760	-0.721148	1	-0.51919	1	-0.0594947	1	-0.424339	1
chr1.18535371.18537101	-1.34627	0.154469	-1.6643	0.0106258	-1.57242	0.0274724	-0.309082	1
chr1.18550639.18551761	-1.81812	0.0214054	-0.618054	1	-0.923483	0.780478	-1.54925	0.301545
chr1.18578512.18579475	-1.42131	0.199607	-1.38422	0.148063	-0.721056	1	-0.258914	1
chr1.18583201.18584349	-0.647516	1	-0.517141	1	-0.599196	1	0.528963	1
chr1.18588375.18590031	-1.37154	0.0475394	-1.53793	0.00389793	-1.29335	0.0532354	0.00684516	1
chr1.18590693.18591365	-1.47381	0.141501	-1.57193	0.042703	-1.30746	0.211828	0.653009	1
chr1.18594261.18595314	-0.46771	1	-0.291744	1	-0.13088	1	-0.10555	1
chr1.18598972.18599248	-2.50443	0.0127445	-1.79134	0.0498424	-1.60601	0.141526	-0.424314	1
chr1.18600607.18601076	-0.405113	1	0.00169933	1	-0.198033	1	1.11974	1
chr1.18602748.18603475	-1.24236	0.458432	-1.08084	0.56691	-1.09558	0.58865	-0.0867382	1
chr1.18615927.18616897	-2.09215	0.000305563	-1.62544	0.00286575	-1.45018	0.0227464	-0.194707	1
chr1.18633628.18634653	-1.11533	0.497433	-0.90184	0.822304	-0.857211	0.95361	0.0722082	1
chr1.18639148.18640484	0.229556	1	1.445	0.0420397	0.598862	1	0.509092	1
chr1.18640906.18641673	1.08611	0.944357	0.887632	1	0.700237	1	1.03571	1
chr1.18666969.18668917	-0.865103	0.939854	-0.857252	0.938509	-0.650792	1	-0.0565624	1
chr1.18673517.18673903	-1.94672	0.181182	-1.3757	0.448648	-0.547173	NA	0.406642	1
chr1.18690035.18690882	1.2552	0.867375	2.88906	0.0100123	1.74571	0.394567	2.1339	0.638278
chr1.18698261.18699185	-0.662886	1	-0.443538	1	-0.0762243	1	0.0824301	1
chr1.18737431.18738890	1.10838	0.585337	0.781545	1	1.24494	0.374479	0.80721	1
chr1.18758429.18758757	0.386473	1	1.01097	1	1.71458	0.723933	2.00848	1
chr1.18764128.18764568	0.224043	1	0.114305	1	-0.0931877	1	0.919428	1
chr1.18766029.18767087	-0.561971	1	-0.238752	1	-0.0302542	1	0.51686	1
chr1.18793572.18793977	-1.0888	0.718713	-0.35649	1	-1.39644	0.277003	-0.222106	1
chr1.18807037.18807681	-0.120155	1	0.167078	1	0.221638	1	1.17883	1
chr1.18852604.18853818	-0.272627	1	-0.0914824	1	0.0306562	1	0.599239	1
chr1.18857406.18858387	-1.28025	0.34348	-0.759042	1	-0.417151	1	0.400596	1
chr1.18902557.18904000	0.136972	1	0.748443	1	0.616224	1	0.739895	1
chr1.18904117.18905771	-0.760886	0.923993	-0.696198	1	-0.199277	1	0.231784	1
chr1.18911193.18912059	0.636205	1	0.95334	0.87209	0.989541	0.823829	0.305183	1
chr1.18913022.18913816	1.05109	0.930577	2.88571	0.000430755	2.02042	0.0668669	1.70607	0.80244
chr1.18922947.18923637	0.748849	1	0.350023	1	0.705616	1	0.524261	1
chr1.18936012.18937697	-0.969562	0.597963	-1.1238	0.24118	-0.974478	0.536735	0.15709	1
chr1.18955620.18956548	0.579056	1	0.44499	1	0.220849	1	0.792497	1
chr1.18961492.18962694	0.216259	1	0.274259	1	0.490957	1	0.807483	1
chr1.18963683.18964185	-0.0302212	1	0.667478	1	-0.27583	1	0.060007	1
chr1.18975373.18975777	-0.388002	1	-0.216675	1	0.277539	1	0.260484	1
chr1.18976443.18977447	-0.491195	1	-0.182982	1	-0.167304	1	-0.0794794	1
chr1.19002854.19003204	-0.104416	1	-0.252751	1	-1.18569	0.898652	-0.0390936	1
chr1.19031994.19033390	-1.15264	0.13405	-1.5623	0.000926583	-1.59884	0.00100313	-0.751231	1
chr1.19040238.19040896	-0.607226	1	1.13423	0.811394	0.0500116	1	0.150757	1
chr1.19046508.19047313	0.592323	1	0.865002	1	1.34464	0.779841	1.33194	1
chr1.19047665.19048086	-0.554243	1	-0.576538	1	-0.467716	1	-0.347421	1
chr1.19056032.19057018	-1.04897	0.313637	-0.889562	0.546536	-0.770731	0.926081	-0.514569	1
chr1.19057531.19057922	-2.09797	0.121671	-1.32403	0.515568	-1.31087	NA	0.188019	NA
chr1.19074253.19074670	-2.95197	0.000529785	-1.50061	0.0847458	-1.18689	0.392392	-0.10645	1
chr1.19096785.19097468	-1.01357	0.703506	-0.827286	1	-0.506178	1	-0.564708	1
chr1.19103804.19104888	0.711669	1	0.775632	1	0.652346	1	0.640647	1
chr1.19109773.19110181	-0.853683	1	0.418174	1	-0.19059	1	0.114739	1
chr1.19142602.19143092	-0.0557597	1	-0.399948	1	-0.520834	1	0.468973	1
chr1.19143591.19144259	-1.82116	0.0121395	-1.94025	0.000904421	-1.98301	0.00124037	-0.429819	1
chr1.19149828.19150055	1.24129	1	1.39431	0.968424	1.16978	1	1.65205	1
chr1.19159118.19160167	1.04593	1	0.826675	1	1.70527	0.313455	1.15644	1
chr1.19165901.19166284	0.0819337	1	0.444204	1	0.0553242	1	-0.181138	1
chr1.19178794.19180088	-0.0409275	1	-0.117805	1	0.0622224	1	-0.00321924	1
chr1.19192506.19192948	-0.136754	1	-0.108811	1	-0.424297	1	0.0482296	1
chr1.19205627.19206509	-0.0358658	1	0.440205	1	-0.0288755	1	0.714715	1
chr1.19240940.19241770	-0.72653	1	-0.650889	1	-0.81126	1	-0.599233	1
chr1.19265024.19266300	0.373861	1	0.339074	1	0.860477	1	1.49146	1
chr1.19281753.19282487	-0.121042	1	-0.129188	1	-0.0406726	1	1.23639	1
chr1.19287485.19288013	0.326658	1	2.16892	0.143912	1.28746	0.883201	1.28433	1
chr1.19291039.19292768	1.13145	0.58952	1.14156	0.550148	1.35034	0.292906	1.78794	0.195083
chr1.19326865.19328136	0.669272	1	1.52489	0.210687	0.555951	1	1.36334	1
chr1.19332647.19333130	-0.779598	1	-0.908655	1	-0.725132	1	0.680422	1
chr1.19350069.19350894	-0.785194	1	0.299134	1	0.0663155	1	0.0159359	1
chr1.19384928.19385258	1.4117	0.619367	1.01125	1	1.30183	0.759235	1.13009	1
chr1.19388461.19390036	0.87765	0.943871	0.18875	1	0.540252	1	0.102635	1
chr1.19416830.19417462	0.811621	1	1.22086	0.740385	1.11475	0.912579	1.18665	1
chr1.19427386.19427831	0.503444	1	0.26752	1	0.204298	1	0.664002	1
chr1.19459815.19460982	0.683302	1	0.704262	1	1.02725	0.844741	1.50221	0.846865
chr1.19477783.19478557	0.145554	1	0.887375	1	0.804903	1	1.5507	1
chr1.19487313.19488674	-1.76966	0.0275852	-1.27129	0.19596	-1.01159	0.607981	1.12907	1
chr1.19564724.19565364	-0.36792	1	-0.234712	1	-0.176037	1	0.473587	1
chr1.19565721.19566514	0.22802	1	0.338901	1	0.623444	1	0.70836	1
chr1.19592614.19593939	0.578564	1	0.992282	0.860018	1.16934	0.577556	1.24544	1
chr1.19611155.19611937	-1.30905	0.225866	-0.778393	1	-0.760804	1	1.15501	1
chr1.19638761.19639974	1.34293	0.3183	1.82604	0.0272638	1.27242	0.394435	1.55654	0.572594
chr1.19667919.19668200	-1.52071	0.413105	-1.0229	0.906948	-1.03532	0.920694	-0.226926	1
chr1.19668566.19669030	0.590981	1	1.31544	0.852892	1.07301	1	1.52741	1
chr1.19673565.19674821	1.05084	0.651721	0.927091	0.878951	1.18047	0.435986	0.991126	1
chr1.19753675.19755057	0.664438	1	1.84446	0.0113595	0.925205	0.904403	1.64363	0.261215
chr1.19759711.19760909	1.22448	0.671263	2.40864	0.0068053	2.45469	0.00690987	2.47958	0.03077
chr1.19776969.19777866	-0.703182	1	-0.66545	1	-0.924711	0.773444	-0.158928	1
chr1.19786437.19788689	0.07127	1	0.154304	1	0.59517	1	1.03914	1
chr1.19826318.19827423	-0.374815	1	2.12201	0.030687	1.28018	0.60513	1.65738	0.863821
chr1.19849538.19850649	1.07523	0.480263	-0.24314	1	0.7942	1	-0.0367323	1
chr1.19862754.19863674	0.276612	1	1.43217	0.226492	0.594935	1	1.26623	1
chr1.19877006.19878378	-1.67756	0.0128847	-1.36106	0.0484835	-1.39204	0.0503853	-0.056254	1
chr1.19899560.19900365	-0.794753	1	0.186356	1	-0.457479	1	0.045705	1
chr1.19901308.19902689	0.478616	1	0.715694	1	0.929847	0.977134	1.28617	1
chr1.19924406.19924987	1.47325	0.585835	1.05131	1	1.29497	0.801452	1.6652	1
chr1.19927607.19928457	0.352413	1	1.19266	0.602425	0.304052	1	0.699976	1
chr1.19928623.19929192	1.85467	0.577027	1.35639	1	1.903	0.558984	2.5684	0.734918
chr1.19938620.19940200	0.64754	1	1.80662	0.0158335	1.18775	0.430617	1.21341	1
chr1.19951327.19951770	0.270859	1	0.99227	1	0.758584	1	0.949736	1
chr1.19955318.19956280	-1.83809	0.00123717	-2.25856	2.90021e-07	-2.17168	4.29128e-06	-0.875046	1
chr1.19964386.19965524	1.5479	0.277677	0.69453	1	1.02358	0.94851	1.4748	1
chr1.19972767.19973856	0.526019	1	0.335307	1	0.435902	1	0.100377	1
chr1.19982795.19983200	0.299412	1	0.447621	1	0.998471	1	0.900091	1
chr1.19989059.19990192	0.035797	1	0.457362	1	0.344413	1	0.955051	1
chr1.20002301.20002631	-1.05114	0.997335	-0.696485	1	-1.32796	0.636657	0.0277877	1
chr1.20009929.20011567	0.905404	0.937397	1.48481	0.122685	1.54912	0.101762	1.17786	1
chr1.20017749.20018903	-0.395132	1	-0.285079	1	-0.0837372	1	0.138232	1
chr1.20038940.20040054	-1.72758	0.000887079	-1.50084	0.00199587	-1.22325	0.0546504	0.31915	1
chr1.20058030.20058777	-0.548094	1	-0.449044	1	-0.770898	1	-1.06651	1
chr1.20069622.20070454	-0.639619	1	-0.379798	1	-0.119798	1	-0.122049	1
chr1.20135562.20136748	-0.355927	1	-0.136606	1	0.407969	1	0.384213	1
chr1.20139509.20140297	0.994753	0.983525	1.25596	0.60767	1.23345	0.662886	1.59984	0.940866
chr1.20148552.20150281	-0.119456	1	1.04474	0.494877	-0.171113	1	0.89912	1
chr1.20170514.20171620	0.500954	1	1.41199	0.237327	0.382906	1	0.81381	1
chr1.20190059.20190939	-1.07531	0.562292	-0.588821	1	-0.505517	1	0.713193	1
chr1.20193531.20194529	0.648136	1	0.566592	1	0.263716	1	1.46905	1
chr1.20213738.20214945	0.73679	1	0.603357	1	0.511574	1	1.186	1
chr1.20224062.20225157	0.0652124	1	0.268185	1	0.616531	1	0.82388	1
chr1.20264858.20265843	0.723939	1	0.568414	1	0.834137	1	1.38839	1
chr1.20277284.20277980	-0.445707	1	0.213641	1	0.441723	1	0.664999	1
chr1.20300891.20302196	-0.109102	1	0.246894	1	0.491179	1	0.665344	1
chr1.20302323.20303510	-0.359361	1	-0.0973987	1	-0.0873626	1	-0.527882	1
chr1.20306015.20306655	-0.42159	1	-0.118635	1	-0.38233	1	0.0290682	1
chr1.20310961.20312351	-0.694766	1	-0.631761	1	-0.49849	1	-0.318491	1
chr1.20328358.20329403	1.51289	0.372719	2.77616	0.00100892	1.86978	0.120388	1.43416	1
chr1.20332913.20333529	-0.199043	1	1.86469	0.163831	0.814871	1	0.702002	1
chr1.20345473.20346756	-0.192181	1	1.33278	0.187385	0.454573	1	0.615226	1
chr1.20351839.20352871	-2.00154	6.42941e-05	-1.855	3.38993e-05	-1.55589	0.00339279	-0.0647787	1
chr1.20354134.20354726	-0.675479	1	-0.149116	1	-0.177503	1	-0.0307344	1
chr1.20360119.20360718	0.406089	1	0.464809	1	0.96465	1	0.815977	1
chr1.20368745.20369915	-1.45461	0.16612	-1.05021	0.541108	-1.28917	0.241162	-0.401369	1
chr1.20376041.20377670	-1.57179	0.0142296	-1.88171	0.000129728	-1.75596	0.0010654	-0.265722	1
chr1.20390567.20391666	0.691877	1	0.464459	1	0.297507	1	1.01633	1
chr1.20427980.20429281	-0.686815	1	-0.104928	1	-0.744205	1	0.0963974	1
chr1.20442719.20443479	-1.41013	0.216593	-0.758339	1	-0.726226	1	-0.0724277	1
chr1.20449394.20450937	-0.72187	0.995652	-0.650913	1	-0.552109	1	-0.394365	1
chr1.20454395.20455204	0.261998	1	0.4646	1	0.636203	1	0.173627	1
chr1.20456187.20456667	-0.618874	1	-0.180583	1	0.0848701	1	0.188737	1
chr1.20462977.20464559	1.36621	0.290017	0.961365	0.878211	1.17178	0.527489	0.405053	1
chr1.20467046.20467568	0.852284	1	0.811382	1	0.763859	1	0.956855	1
chr1.20470264.20471547	0.438183	1	0.34123	1	0.307942	1	0.162791	1
chr1.20476165.20476805	0.248132	1	0.150699	1	0.459158	1	0.530329	1
chr1.20477364.20478718	0.36393	1	0.380475	1	0.398051	1	0.304179	1
chr1.20493720.20495316	-1.39108	0.0639045	-1.29564	0.0653188	-1.45338	0.0245241	-0.72848	1
chr1.20498898.20499768	0.082309	1	0.181704	1	-0.415932	1	0.0236261	1
chr1.20503568.20504638	-1.19478	0.213689	-0.657079	1	-0.854166	0.762906	-0.211022	1
chr1.20513093.20514054	-0.588193	1	-0.474407	1	-0.401013	1	-0.196177	1
chr1.20520021.20520486	-0.910942	1	-1.14988	0.572273	-1.08283	0.729878	-0.654198	1
chr1.20540325.20540921	-0.687115	1	0.0798476	1	-0.0621414	1	0.923967	1
chr1.20543819.20544855	-0.994296	0.832446	-0.515682	1	-0.667484	1	-0.174848	1
chr1.20553886.20555103	0.0201574	1	-0.249638	1	-0.198276	1	-0.295544	1
chr1.20568790.20569878	1.06309	0.803481	2.29707	0.00387979	1.38529	0.363998	1.24047	1
chr1.20611872.20613359	-0.0247936	1	-0.126312	1	0.0851579	1	-0.0789682	1
chr1.20620306.20621299	-1.515	0.00837771	-1.32468	0.0211415	-0.973414	0.361354	-0.174888	1
chr1.20622840.20623705	-1.63265	0.00323907	-1.56594	0.00131507	-1.2842	0.039363	-0.348718	1
chr1.20633187.20635373	-1.09803	0.0966493	-1.39899	0.00106449	-0.976722	0.199015	-0.462948	1
chr1.20655030.20655822	-1.80395	0.0100107	-1.56926	0.0160561	-1.68016	0.00987196	-0.456302	1
chr1.20670443.20671760	-1.36429	0.0231253	-1.46353	0.00299233	-1.41622	0.00746631	-0.357409	1
chr1.20677914.20678398	-2.74685	0.000681467	-2.99565	2.64822e-06	-2.62766	0.000192559	-3.28571	3.30219e-05
chr1.20682417.20682794	0.267526	1	0.00342458	1	-0.14798	1	-0.369081	1
chr1.20685218.20685896	-1.45383	0.0605071	-1.75977	0.0018107	-1.33268	0.0860819	-0.871393	1
chr1.20687534.20687956	-0.962086	0.855496	-1.37418	0.196963	-1.42644	0.197211	-0.73468	1
chr1.20699864.20700678	-0.205117	1	-0.357545	1	-0.229557	1	0.0930316	1
chr1.20724447.20725434	-0.18862	1	-0.561636	1	-0.273064	1	-0.580179	1
chr1.20730871.20731425	-2.1796	0.0228378	-2.00499	0.0095702	-1.81752	0.0413062	-1.20804	1
chr1.20738297.20738991	-0.853986	0.754752	-0.752809	0.991425	-0.860206	0.706008	-0.450598	1
chr1.20743663.20744625	-0.753105	1	-0.646614	1	-0.786407	1	0.726265	1
chr1.20749094.20749601	-1.24418	1	-1.09175	1	-0.602785	1	-0.538362	1
chr1.20754345.20754926	-0.432803	1	-0.132865	1	0.0108573	1	-0.33992	1
chr1.20757763.20758260	0.0986421	1	-0.510481	1	-0.550552	1	-0.420383	1
chr1.20759442.20760569	-1.21534	0.295558	-0.956177	0.624177	-0.364716	1	-0.912489	1
chr1.20773967.20774553	-1.11535	0.931469	-0.677614	1	-0.700574	1	-0.994938	1
chr1.20775221.20775755	-0.929471	1	-1.09068	0.863009	-0.568253	1	-0.143784	1
chr1.20785800.20786873	-1.45524	0.0443258	-1.05648	0.295655	-1.04075	0.352889	0.0912529	1
chr1.20788234.20789124	-2.0526	2.16038e-06	-1.85201	1.11794e-06	-1.69957	5.3041e-05	-0.496093	1
chr1.20791187.20791868	0.252088	1	-0.170015	1	0.171204	1	-0.117107	1
chr1.20801236.20802232	-0.492408	1	-0.393779	1	-0.315881	1	-0.188583	1
chr1.20819913.20820795	-0.774845	0.775571	-0.973253	0.214402	-0.826706	0.586714	-0.744514	1
chr1.20832285.20833047	0.424086	1	0.494632	1	0.176694	1	-0.0285793	1
chr1.20839689.20840504	1.9646	0.0846561	1.39849	0.45564	1.84773	0.127301	0.174121	1
chr1.20845503.20846485	-1.38749	0.0945081	-0.703315	1	-1.57984	0.0155622	-1.78072	0.0248518
chr1.20848430.20849081	0.390592	1	0.434815	1	0.64891	1	0.261666	1
chr1.20860596.20861212	0.817186	1	0.469026	1	0.407412	1	-0.073023	1
chr1.20861863.20862497	-0.215678	1	-0.227306	1	-0.0492809	1	-0.472996	1
chr1.20867147.20868650	0.771858	1	0.453758	1	0.354016	1	0.0691538	1
chr1.20873749.20874622	-0.322883	1	-0.145412	1	-0.186424	1	-0.29335	1
chr1.20877331.20878347	-0.843251	0.96905	-1.32456	0.147589	-0.754909	1	-0.368525	1
chr1.20880214.20880941	-0.725337	1	0.147748	1	-0.360869	1	-0.169911	1
chr1.20882820.20883762	-0.450293	1	-0.236227	1	-0.246532	1	-0.559107	1
chr1.20885819.20886222	-2.14509	0.0692167	-1.67767	0.121683	-1.56376	0.224225	-1.42788	1
chr1.20889907.20891617	0.0417496	1	-0.175196	1	-0.0511237	1	0.123616	1
chr1.20893141.20893382	-0.0927846	1	0.0105131	1	-0.290539	1	-1.39947	1
chr1.20898489.20899079	-0.970077	1	0.33421	1	-0.834907	1	-1.22402	1
chr1.20900343.20901104	-0.105529	1	0.448554	1	0.273903	1	-0.449381	1
chr1.20901313.20902188	-1.11902	0.317889	-0.746952	1	-0.873719	0.740012	0.0138327	1
chr1.20905414.20906785	-0.795208	1	0.150893	1	-0.240897	1	-0.441585	1
chr1.20908347.20909099	-1.29001	0.332151	0.0855142	1	-0.818872	1	-1.95585	0.067215
chr1.20912148.20912957	-1.09176	0.333301	-0.748148	1	-1.18008	0.169226	-0.167219	1
chr1.20919587.20920154	-0.413558	1	0.199699	1	-0.29469	1	-0.923143	1
chr1.20920744.20921739	1.09745	0.431456	1.61482	0.0167642	1.26673	0.189266	0.25333	1
chr1.20922359.20923912	1.14819	0.240653	1.49178	0.0156083	1.36055	0.056892	0.184729	1
chr1.20925688.20926367	-0.868631	0.866002	-1.24216	0.165485	-1.00045	0.555167	-0.203675	1
chr1.20930447.20931007	1.35621	0.579991	1.02868	1	1.27209	0.689737	0.119532	1
chr1.20933032.20934062	0.381652	1	0.256487	1	0.471269	1	-0.23475	1
chr1.20938751.20939552	0.30389	1	0.1834	1	0.229733	1	-0.0379996	1
chr1.20941064.20942226	-0.345407	1	-0.257161	1	0.0994279	1	0.358469	1
chr1.20950961.20952444	-0.233483	1	-0.34606	1	-0.190687	1	0.10824	1
chr1.20974140.20975369	0.907646	1	2.20925	0.00719102	1.65834	0.143717	1.2189	1
chr1.20981046.20982260	-0.00867069	1	-0.139823	1	0.194728	1	-0.114249	1
chr1.20983872.20984971	1.2658	0.43327	1.6071	0.103257	1.41573	0.259244	0.530329	1
chr1.20995301.20996034	1.63802	0.0247141	0.393727	1	1.01483	0.600345	-0.699637	1
chr1.20997320.20998636	1.50438	0.0657681	0.686251	1	1.12697	0.404003	0.0803813	1
chr1.21002376.21003376	-0.830066	0.85736	-0.624039	1	-0.856819	0.766916	-1.22444	0.621303
chr1.21004859.21005283	-0.139709	1	-0.144853	1	0.0948156	1	-0.408295	1
chr1.21007965.21009679	0.798304	0.966705	0.334958	1	0.782394	1	-0.222454	1
chr1.21010214.21010958	2.13945	0.00550639	0.906999	0.994404	1.64922	0.0866883	0.156576	1
chr1.21012554.21013026	3.57639	0.129811	3.09481	0.257725	3.3191	0.205763	2.40714	1
chr1.21014278.21015458	1.54813	0.0685699	0.884003	0.905682	1.63636	0.0331823	-0.226886	1
chr1.21028590.21029485	-1.60152	0.00699409	-1.60557	0.00161866	-1.43302	0.0153191	0.0223438	1
chr1.21035840.21036204	-0.726744	1	-0.818449	1	-0.784312	1	-0.850917	1
chr1.21050562.21053427	0.1173	1	-0.0586575	1	-0.0811111	1	-0.320117	1
chr1.21067714.21069195	0.603398	1	0.17694	1	0.346976	1	-0.732461	1
chr1.21073211.21074031	0.328252	1	0.246508	1	0.645854	1	0.081774	1
chr1.21074157.21074587	-0.950034	0.817718	-0.53303	1	-0.669957	1	-1.70534	0.2193
chr1.21078734.21079916	0.429093	1	0.148248	1	0.213144	1	-0.280455	1
chr1.21086242.21086917	0.540343	1	0.238576	1	0.864895	1	-0.601184	1
chr1.21093409.21093696	-1.1392	1	-0.989363	1	-0.0486614	NA	-1.15687	NA
chr1.21100822.21102023	0.208475	1	0.118705	1	0.160783	1	-0.0634158	1
chr1.21103431.21103940	-0.00315568	1	0.486323	1	0.447038	1	0.598473	1
chr1.21124740.21125764	1.48805	0.216417	0.884694	1	1.56132	0.157897	0.487962	1
chr1.21133680.21134535	-1.78038	0.00616169	-2.33641	1.27564e-06	-2.05393	0.000136083	-0.671086	1
chr1.21146774.21148458	-0.223985	1	0.562656	1	0.0401614	1	0.265298	1
chr1.21161732.21162127	0.228467	1	-0.00320501	1	-0.0050312	1	-0.0453248	1
chr1.21166124.21167383	0.13302	1	-0.100268	1	-0.050336	1	0.144273	1
chr1.21189253.21190153	-0.0788197	1	-0.38169	1	0.297348	1	-0.200127	1
chr1.21204637.21205342	0.186161	1	1.50847	0.33566	0.887871	1	0.0607698	1
chr1.21207784.21208884	-0.661732	1	0.901401	0.990304	-0.234345	1	-1.01592	1
chr1.21209044.21209364	-1.56191	0.607765	-0.501374	1	-2.35605	NA	-2.03974	NA
chr1.21213678.21214791	0.0554065	1	-0.52337	1	-0.0690074	1	0.00149534	1
chr1.21215277.21215472	3.87751	0.0744204	3.83303	0.0812207	3.03097	0.289074	2.14168	1
chr1.21218235.21219839	0.0744497	1	-0.0957819	1	0.0427082	1	0.146803	1
chr1.21229452.21230643	-0.0810983	1	0.65093	1	0.176343	1	-0.487246	1
chr1.21231730.21233117	-0.689743	1	-0.213307	1	-0.409294	1	0.293421	1
chr1.21238020.21238507	-0.675412	1	-0.393461	1	-0.945442	0.918209	-0.587248	1
chr1.21240305.21240720	-0.366686	1	0.0926549	1	-0.119588	1	1.01503	1
chr1.21245952.21246621	-1.55297	0.225312	-1.51381	0.153811	-1.31452	0.364432	-1.5918	0.652656
chr1.21248243.21249361	0.476699	1	0.294355	1	0.390936	1	-0.25161	1
chr1.21250658.21250975	-0.329043	1	-0.700961	1	-0.402769	1	-0.859312	1
chr1.21256294.21257131	-1.56885	0.0257017	-1.19715	0.142575	-1.331	0.0734229	-0.239628	1
chr1.21259216.21259866	-0.605732	1	-0.642377	1	-0.569116	1	-1.10536	1
chr1.21263528.21263945	0.804406	1	0.709429	1	0.920323	1	0.620726	1
chr1.21264703.21265210	-0.205191	1	-0.186445	1	-0.0548791	1	0.177957	1
chr1.21266850.21267102	0.76487	1	0.358848	1	0.743454	1	0.294341	1
chr1.21271142.21272503	-0.103943	1	-0.242651	1	-0.362098	1	-0.079277	1
chr1.21274506.21275267	1.91983	0.129329	0.741825	1	1.27849	0.686141	0.354835	1
chr1.21275314.21276068	0.205301	1	0.074925	1	0.438247	1	0.0598159	1
chr1.21284420.21284789	0.577678	1	3.54735	0.0164867	2.1482	NA	1.75393	NA
chr1.21300724.21301239	-1.01629	0.705758	-1.11745	0.434681	-0.683436	1	0.012848	1
chr1.21304522.21306182	0.800338	1	1.17862	0.277218	0.928381	0.767408	0.497292	1
chr1.21314303.21314688	-2.42843	0.0913563	-0.472507	1	-0.0752233	1	1.38611	1
chr1.21343358.21344949	-0.00753712	1	-0.212761	1	-0.27709	1	-0.360063	1
chr1.21362634.21362960	0.593219	1	1.95678	0.616455	2.74431	NA	1.66318	NA
chr1.21411083.21412485	0.222358	1	-0.646196	1	-0.405581	1	-1.15973	0.177944
chr1.21414792.21415545	-1.10814	0.505527	-0.345542	1	-0.889541	0.87671	0.765715	1
chr1.21417189.21417512	-0.573189	1	-1.22901	0.797041	-0.587311	NA	-0.753783	NA
chr1.21419240.21419905	-0.319336	1	-0.171541	1	-0.0330024	1	0.0174219	1
chr1.21421765.21422165	0.091115	1	-0.286504	1	-0.212418	1	1.05172	1
chr1.21423469.21424204	-1.03709	0.651672	-1.15473	0.376817	-1.47815	0.106551	0.338992	1
chr1.21427780.21428355	-0.687144	1	-1.12631	0.663683	-1.10127	0.73367	-0.644466	1
chr1.21434697.21435472	-1.73044	0.0141019	-1.27587	0.0966221	-1.77105	0.00358349	-1.47648	0.200758
chr1.21436340.21437629	0.037681	1	1.14001	0.63851	0.340287	1	-0.262214	1
chr1.21445617.21446424	0.60436	1	0.206271	1	0.166483	1	-0.00699782	1
chr1.21448056.21448686	0.228574	1	0.16711	1	0.227207	1	0.354256	1
chr1.21453039.21453645	1.09231	0.666875	0.212586	1	0.786016	1	-0.409519	1
chr1.21456492.21457123	0.085288	1	0.0299566	1	-0.171888	1	0.118195	1
chr1.21458547.21459174	0.13426	1	0.162357	1	0.0594326	1	-0.0638563	1
chr1.21460866.21461802	0.896291	0.755567	0.406488	1	0.74532	1	-0.212526	1
chr1.21466325.21466927	0.444601	1	0.477517	1	0.480374	1	0.352309	1
chr1.21475365.21475986	-0.52522	1	-0.837864	1	-0.988159	0.861729	0.559141	1
chr1.21480386.21480809	0.793461	1	0.565836	1	0.644478	1	0.354153	1
chr1.21484437.21485554	1.46872	0.153687	0.824769	1	1.12037	0.539696	0.758131	1
chr1.21490173.21490548	-1.17908	0.905944	0.10973	1	-0.153379	1	0.439986	1
chr1.21491048.21492346	-0.672373	1	-0.893715	0.584946	-0.670362	1	0.900156	1
chr1.21494254.21494494	-1.39032	0.595086	-1.15313	0.798829	-0.984154	NA	0.613417	1
chr1.21496208.21497007	-0.15747	1	-0.23228	1	0.12905	1	0.76378	1
chr1.21499363.21501439	0.468772	1	0.150119	1	0.604075	1	0.230482	1
chr1.21505978.21507371	-0.634097	1	-0.536121	1	-0.642177	1	0.777236	1
chr1.21507736.21508577	-0.61771	1	-0.599819	1	-0.740616	1	0.477893	1
chr1.21527667.21527980	-0.463772	1	-0.00415974	1	0.0133846	1	0.438601	1
chr1.21531330.21532166	0.732166	1	-0.141454	1	0.693539	1	0.131088	1
chr1.21532607.21533231	-0.624959	1	-0.591441	1	-0.772416	1	0.351203	1
chr1.21535209.21535998	1.7026	0.0536164	0.567449	1	1.15179	0.527884	0.21745	1
chr1.21539373.21540201	0.58526	1	-0.196394	1	-0.0662638	1	-0.408599	1
chr1.21549719.21550567	-0.0610566	1	-0.434459	1	-0.229975	1	-0.0887034	1
chr1.21552564.21553653	-0.584441	1	-0.536247	1	-0.447588	1	0.522521	1
chr1.21554860.21555213	-0.979075	0.997897	-0.743935	1	-0.359952	1	0.764162	1
chr1.21562383.21562676	-1.59288	0.557297	-1.40621	0.580408	-0.761504	NA	-1.60821	NA
chr1.21563207.21564498	0.285633	1	-0.533774	1	-0.165511	1	0.660567	1
chr1.21597654.21598632	0.102657	1	0.797925	1	0.567744	1	0.499136	1
chr1.21600464.21601283	-0.729477	1	-0.89414	0.633487	-0.90226	0.642679	0.528949	1
chr1.21602436.21603122	-0.00712709	1	-0.437019	1	-0.196732	1	-0.66657	1
chr1.21608171.21608986	-0.0236385	1	-0.145033	1	0.240871	1	-0.312955	1
chr1.21614458.21614986	1.39101	0.50821	0.620949	1	0.989575	1	0.0092875	1
chr1.21616440.21617103	-0.574259	1	-0.309517	1	0.0805128	1	0.464795	1
chr1.21618471.21619008	-0.817107	1	-1.07899	0.559889	-0.78488	1	0.478229	1
chr1.21621437.21621753	-0.320099	1	-1.86032	0.285492	-0.632169	1	-0.372246	1
chr1.21631869.21632243	-0.346535	1	-0.563626	1	-0.512805	1	0.354255	1
chr1.21632940.21633363	-0.11813	1	0.0639101	1	0.451063	1	1.17873	1
chr1.21643097.21643948	-0.953267	0.869202	-0.740292	1	-0.993134	0.77149	0.321616	1
chr1.21648540.21648969	-0.713184	1	-0.0940172	1	-0.370454	1	0.165033	1
chr1.21650000.21651661	0.495216	1	0.0868205	1	0.500983	1	-0.0456954	1
chr1.21654694.21655086	0.491031	1	0.393069	1	0.860841	1	0.013563	1
chr1.21656067.21656926	0.420414	1	0.417151	1	0.419325	1	0.889275	1
chr1.21670127.21670447	-0.75397	1	-0.68072	1	-0.584254	1	0.451175	1
chr1.21676347.21677263	-0.672786	1	-0.969559	0.391683	-0.61161	1	0.57159	1
chr1.21683950.21685181	0.094347	1	-0.141448	1	0.383366	1	0.100817	1
chr1.21688691.21689466	0.10946	1	-0.160884	1	-0.174878	1	0.764179	1
chr1.21690391.21691169	-0.547042	1	-0.785252	1	-0.47475	1	0.931591	1
chr1.21698525.21699322	1.92656	0.0649777	0.816342	1	1.57695	0.238009	0.257325	1
chr1.21699641.21700301	0.124477	1	-0.3387	1	0.112786	1	-0.437897	1
chr1.21720626.21721610	-0.330401	1	-0.219917	1	-0.341713	1	1.17178	1
chr1.21729175.21730313	-0.218608	1	0.198533	1	0.620649	1	0.598936	1
chr1.21736051.21736844	1.19497	0.607389	0.64333	1	0.614425	1	-0.40161	1
chr1.21739480.21740169	-0.311838	1	-0.349895	1	0.0637449	1	0.64492	1
chr1.21746141.21746444	0.0200853	1	0.207922	1	0.53968	1	0.313061	1
chr1.21748161.21748543	1.6589	0.353498	0.584644	1	1.29948	0.729933	-0.587218	1
chr1.21748830.21749930	0.375457	1	0.287782	1	0.493519	1	0.240835	1
chr1.21750833.21751430	0.416912	1	0.503412	1	0.237721	1	-0.0741906	1
chr1.21751592.21752208	-0.218044	1	-0.408757	1	-0.0098311	1	0.504649	1
chr1.21754925.21755174	0.168732	1	-0.0287655	1	-0.115263	1	0.147252	1
chr1.21756380.21757395	-0.504307	1	-0.416766	1	-0.284798	1	-0.409684	1
chr1.21764793.21765567	0.0201169	1	-0.315108	1	-0.0689766	1	-0.490467	1
chr1.21770482.21771079	-0.588486	1	-0.934616	0.612102	-0.827957	0.910137	0.572736	1
chr1.21771179.21771929	-0.744135	1	-1.03066	0.731422	-1.50055	0.202828	-0.33779	1
chr1.21774543.21775643	-0.602691	1	-1.02253	0.317072	-0.970188	0.447518	0.159745	1
chr1.21780333.21781878	0.527996	1	-0.198128	1	0.138203	1	0.129245	1
chr1.21782591.21783625	-0.309989	1	-0.151638	1	-0.404709	1	0.0460796	1
chr1.21788774.21789135	-0.39868	1	0.370657	1	0.386546	1	1.59934	1
chr1.21796591.21797450	-0.492998	1	1.31824	0.312056	-0.0887548	1	0.214825	1
chr1.21804538.21805714	0.184451	1	-0.374267	1	0.134997	1	-0.16616	1
chr1.21829600.21831021	0.302121	1	-0.051955	1	0.151379	1	-0.15007	1
chr1.21836417.21836779	-1.27898	0.604694	-1.33025	0.422154	-1.51148	0.299767	-1.22402	1
chr1.21837685.21839543	-0.678667	1	-0.428846	1	-0.402156	1	0.268568	1
chr1.21854982.21855397	-0.534378	1	0.12139	1	0.0392185	1	1.02043	1
chr1.21862379.21862934	-1.18045	0.357177	-0.9047	0.761892	-0.785355	1	0.526805	1
chr1.21868391.21869480	1.67322	0.0738481	0.441892	1	1.05207	0.722736	-0.384684	1
chr1.21882713.21883011	0.259562	1	-0.0669239	1	-0.0137927	NA	-1.06098	NA
chr1.21894365.21895545	-0.629109	1	-0.559913	1	-0.482325	1	0.388895	1
chr1.21896166.21896747	0.780579	1	0.69164	1	0.583944	1	0.532025	1
chr1.21900868.21902109	0.0917717	1	0.00152686	1	0.182276	1	0.649693	1
chr1.21916912.21917321	-0.611178	1	-1.15404	0.406085	-1.11073	0.516595	0.0145297	1
chr1.21918837.21920242	0.567849	1	0.029292	1	0.367366	1	0.207968	1
chr1.21922437.21923641	1.52518	0.108549	0.613747	1	1.0484	0.662542	0.711045	1
chr1.21938638.21939245	-1.22161	0.709544	-1.69934	0.160156	-0.819756	1	-0.662997	1
chr1.21940740.21942227	-0.939531	0.384136	-0.791492	0.717435	-0.740768	0.917407	0.602138	1
chr1.21947771.21948461	0.395965	1	0.090394	1	-0.0256815	1	0.58675	1
chr1.21950149.21950864	1.12444	0.887747	1.24238	0.736697	1.04579	1	1.18926	1
chr1.21957926.21958329	0.422911	1	0.416672	1	0.691773	1	0.257008	1
chr1.21960344.21962715	0.737437	0.894913	0.298021	1	0.41183	1	0.665116	1
chr1.21962971.21963773	0.0349119	1	-0.0893041	1	-0.0682137	1	0.997302	1
chr1.21967150.21967634	0.469075	1	0.184951	1	0.145215	1	0.475241	1
chr1.22033082.22033694	1.2668	0.830398	0.833707	1	1.10201	1	0.508655	1
chr1.22062811.22063892	0.625596	1	0.461868	1	0.221306	1	-0.161846	1
chr1.22070028.22070505	0.665824	1	1.23589	0.855773	1.16358	0.96686	0.711165	1
chr1.22071427.22072404	0.390965	1	2.65096	0.00027897	1.67362	0.134542	0.790241	1
chr1.22085107.22085721	-0.225912	1	-0.667569	1	-0.857833	1	0.735997	1
chr1.22105566.22105849	0.0898406	1	0.546145	1	0.359828	1	0.211031	1
chr1.22109698.22110483	-0.0692284	1	0.804639	1	0.507948	1	-0.0172504	1
chr1.22136441.22137426	-0.0653694	1	-0.0539318	1	0.0948472	1	0.223085	1
chr1.22142477.22143192	0.911644	1	0.649547	1	0.587358	1	0.174771	1
chr1.22182947.22183709	-0.584744	1	-0.285305	1	0.154487	1	-0.0660414	1
chr1.22193854.22194556	-0.749683	1	-0.45501	1	-0.367341	1	0.0959349	1
chr1.22195478.22195875	-0.425061	1	-1.33213	0.483031	-0.896873	1	1.07305	1
chr1.22206964.22207679	-0.883809	1	1.34137	0.235694	0.258356	1	-0.146416	1
chr1.22210274.22211062	-1.05408	0.647758	-1.20579	0.310172	-0.954722	0.779792	-0.272761	1
chr1.22211213.22212173	-0.839151	0.861023	-0.670465	1	-0.75794	1	0.96021	1
chr1.22222181.22223277	-0.476759	1	-0.919271	0.760423	-0.703809	1	0.636037	1
chr1.22228703.22228919	-1.67485	0.221523	-1.57278	0.161702	-1.97477	NA	-1.80528	0.463454
chr1.22230241.22230528	-0.908727	1	0.145871	1	0.0819363	NA	1.28676	NA
chr1.22245553.22246553	-0.724092	1	-0.361693	1	-0.451644	1	-1.3721	1
chr1.22255516.22256027	1.25533	1	1.43745	1	1.4847	1	0.564655	1
chr1.22260293.22260823	-0.0329383	1	-0.131601	1	-0.0510939	1	-0.0987924	1
chr1.22261816.22263612	0.15187	1	-0.512059	1	0.0648439	1	0.241786	1
chr1.22265606.22265898	-0.234118	1	0.579064	1	0.0123816	1	-0.0186961	1
chr1.22266428.22267015	-0.94829	0.595807	-0.630719	1	-0.537885	1	-0.239118	1
chr1.22268644.22269514	-0.0207088	1	-0.0745724	1	-0.158336	1	-0.332872	1
chr1.22274138.22275907	-0.871896	0.833922	0.164432	1	-0.350265	1	-0.0922116	1
chr1.22283746.22284705	0.926173	0.929097	0.826863	1	0.823627	1	-0.495158	1
chr1.22297066.22297588	-0.882937	0.98142	-0.345882	1	-1.01085	0.723126	0.127718	1
chr1.22299300.22300158	-0.772625	1	0.200036	1	0.0154074	1	-0.674357	1
chr1.22301418.22301987	-1.6035	0.0593858	-1.53773	0.0321652	-1.49317	0.0594901	-0.242133	1
chr1.22305112.22305719	0.23405	1	0.41533	1	-0.0331237	1	-0.189094	1
chr1.22307815.22308370	-0.38443	1	1.01332	0.871942	0.61013	1	-0.00866148	1
chr1.22315328.22316599	0.291093	1	1.45239	0.114901	0.854883	1	0.125826	1
chr1.22319975.22320433	2.51228	0.0112844	1.79772	0.168216	2.1799	0.0478814	0.679967	1
chr1.22322895.22323549	-1.0245	0.523558	-0.915591	0.638114	-0.830199	0.896534	-0.338874	1
chr1.22338836.22339777	1.44306	0.253807	1.49388	0.182444	1.28598	0.418928	0.0696705	1
chr1.22344749.22346514	-0.00908303	1	0.763932	1	0.244471	1	0.103949	1
chr1.22352621.22353345	0.267269	1	1.48226	0.419241	0.953966	1	0.0760722	1
chr1.22358336.22358681	0.108409	1	0.750816	1	-0.128326	1	1.16574	1
chr1.22367855.22368207	1.14716	0.817113	0.496265	1	0.660983	1	-0.284437	1
chr1.22375476.22375838	0.126542	1	1.21008	0.623276	-0.258331	1	-0.599251	1
chr1.22376958.22378323	-1.18802	0.0935181	-0.994949	0.246713	-0.905925	0.459369	0.0697198	1
chr1.22386448.22386654	-0.15576	1	-0.0425063	1	0.0628288	1	0.184873	1
chr1.22403732.22404469	0.601752	1	0.864088	1	0.513867	1	0.41913	1
chr1.22410532.22411141	1.29225	0.730846	1.19271	0.855908	0.868042	1	0.306687	1
chr1.22418071.22418808	-0.711643	1	0.37048	1	-0.253648	1	-0.30206	1
chr1.22420580.22420842	-0.805893	1	-1.66398	0.247511	-0.59282	NA	0.0582645	NA
chr1.22421358.22421907	0.864813	1	1.06412	1	0.750392	1	0.593694	1
chr1.22432203.22432881	-0.296088	1	0.388455	1	0.0903558	1	-0.0743235	1
chr1.22474251.22474767	2.16538	0.0962166	1.34084	0.69477	1.69031	0.359051	0.664018	1
chr1.22486827.22487792	-0.532596	1	-0.479445	1	-0.439543	1	-0.089688	1
chr1.22502124.22502556	1.77924	0.167562	1.29021	0.594892	1.13299	0.839908	0.837382	1
chr1.22503576.22504354	-0.581611	1	-0.458577	1	-0.423967	1	0.230169	1
chr1.22507026.22507256	1.9517	0.328949	1.7948	0.424002	1.86112	0.397085	0.864489	1
chr1.22507364.22509722	1.45049	0.0440775	0.897141	0.71073	1.13225	0.267791	0.141452	1
chr1.22514815.22515551	0.641963	1	-0.0220216	1	0.0818898	1	-0.496569	1
chr1.22526270.22527735	0.259898	1	0.107509	1	0.326337	1	-0.230159	1
chr1.22531156.22531460	-0.764976	1	-0.685242	1	-0.359963	1	0.335727	1
chr1.22533095.22534331	0.259223	1	-0.340254	1	0.0226336	1	0.201964	1
chr1.22539435.22540352	-0.715221	1	-0.574495	1	-0.444702	1	-0.97027	1
chr1.22571319.22572043	-0.445257	1	0.427925	1	-0.00191813	1	0.933886	1
chr1.22573204.22573780	-1.24638	0.387763	-0.964241	0.737455	-0.91946	0.865666	-0.0621634	1
chr1.22574286.22574636	-1.1423	0.994029	-0.257868	1	0.0951657	1	-0.458024	1
chr1.22585385.22585955	-0.297163	1	0.338927	1	0.235767	1	-0.196478	1
chr1.22594920.22595148	1.36608	0.516183	0.354575	1	0.708662	1	-0.687507	1
chr1.22596141.22597335	-0.0747549	1	0.636989	1	0.578934	1	0.0168393	1
chr1.22604018.22605704	1.03678	0.534018	1.74274	0.00559055	1.0329	0.533091	0.559649	1
chr1.22607854.22608083	-1.75761	0.232158	-0.314474	1	-0.454419	1	-0.0434608	1
chr1.22612002.22613366	1.1294	0.392303	1.46552	0.0560227	1.05279	0.511337	0.378624	1
chr1.22614979.22616229	0.0827322	1	0.430867	1	0.59656	1	0.98467	1
chr1.22619801.22620139	-1.0071	0.733246	-1.24245	0.279112	-1.02014	0.6661	-0.0296777	1
chr1.22620721.22621346	0.428803	1	1.68549	0.39114	0.93804	1	0.857234	1
chr1.22625761.22628096	0.282346	1	0.51579	1	0.250706	1	0.433191	1
chr1.22639730.22641156	1.30161	0.113659	1.16354	0.213037	0.862225	0.833395	0.143634	1
chr1.22650006.22650261	-0.547977	1	-0.199632	1	-0.237921	1	0.302914	1
chr1.22653516.22654613	0.375624	1	1.35807	0.152867	0.376496	1	-0.243021	1
chr1.22654735.22655573	-1.22342	0.247466	-0.705676	1	-0.96125	0.605412	0.338458	1
chr1.22655785.22656454	-0.718366	1	0.0257429	1	-0.212938	1	0.022911	1
chr1.22657938.22658393	-1.29059	0.233037	-0.822084	0.958128	-0.870699	0.868069	0.0515527	1
chr1.22661301.22662568	-0.380271	1	-0.617686	1	-0.250002	1	-0.216365	1
chr1.22662634.22663248	0.423681	1	1.2513	0.580772	0.849978	1	-0.258185	1
chr1.22664029.22664718	0.554237	1	0.457951	1	0.280966	1	0.0381786	1
chr1.22670379.22670907	-0.570557	1	-0.650366	1	-0.620874	1	0.277118	1
chr1.22675188.22676020	0.26011	1	0.863686	1	0.487913	1	0.0410167	1
chr1.22690426.22691296	-0.745792	1	-0.249575	1	-0.51199	1	-0.20686	1
chr1.22692634.22692854	-0.328496	1	0.0639875	1	0.172754	1	-0.138241	1
chr1.22694532.22695553	-0.485927	1	-0.345151	1	-0.453558	1	-0.127145	1
chr1.22697452.22698367	0.0977696	1	0.06758	1	-0.0339882	1	-0.411658	1
chr1.22699748.22700118	-1.74587	0.269296	-0.987168	0.948505	-1.38995	0.444779	-1.5664	1
chr1.22708964.22710539	-0.657797	1	-0.632348	1	-0.451632	1	0.17962	1
chr1.22711836.22712685	0.877236	0.995297	1.03418	0.69766	1.0366	0.713909	0.127777	1
chr1.22713931.22714556	0.805168	1	0.170226	1	0.192962	1	-0.807155	1
chr1.22717715.22718116	0.434027	1	0.723254	1	1.12133	0.825764	1.8951	0.414877
chr1.22719488.22721185	-0.819635	0.789449	-0.867674	0.602946	-0.523661	1	-0.443156	1
chr1.22726090.22726436	0.110384	1	0.547988	1	0.37568	1	-0.0339632	1
chr1.22726983.22727617	0.93631	1	1.07126	0.896394	0.972469	1	0.214064	1
chr1.22727731.22728674	0.919418	0.937919	1.2277	0.405092	0.86102	1	0.541059	1
chr1.22733083.22733811	-0.529719	1	0.205654	1	0.0436244	1	-0.586962	1
chr1.22734346.22734872	-1.24268	0.325174	-0.78863	1	-0.699831	1	-0.0023428	1
chr1.22740254.22740992	0.28629	1	1.34974	0.602281	0.730735	1	0.679437	1
chr1.22743069.22743369	-0.366097	1	-0.401286	1	-0.678616	1	-0.314075	1
chr1.22744458.22745257	-1.42953	0.0725037	-0.999734	0.463701	-1.7088	0.0051325	-0.378746	1
chr1.22752096.22753134	0.416867	1	0.941742	0.92119	0.595971	1	-0.0405785	1
chr1.22763239.22765124	-1.24901	0.058407	-1.24212	0.0342803	-1.12748	0.109747	0.369071	1
chr1.22769359.22769773	-0.700915	1	-0.649855	1	-0.944908	0.900286	0.0979264	1
chr1.22774749.22775438	-1.46704	0.050872	-1.31793	0.0633058	-1.34049	0.0687933	-0.397502	1
chr1.22781533.22782967	-0.260505	1	0.0491172	1	-0.207623	1	-0.139767	1
chr1.22783480.22784351	0.415334	1	1.42823	0.322414	1.31953	0.472304	0.523961	1
chr1.22789368.22790150	0.136915	1	0.7418	1	0.674025	1	0.131551	1
chr1.22794891.22795828	0.0426164	1	0.125903	1	0.0652385	1	0.735441	1
chr1.22797187.22797534	-1.0234	0.727777	-0.672022	1	-0.609381	1	0.310599	1
chr1.22800148.22800489	0.71281	1	1.07513	0.983615	0.744353	1	0.65235	1
chr1.22805056.22807091	0.369609	1	0.0357925	1	0.193512	1	0.28456	1
chr1.22830416.22830951	1.79205	0.379756	1.76625	0.381816	1.3426	0.822344	1.51975	1
chr1.22852884.22853184	0.554613	1	0.319301	1	0.584687	NA	1.14066	NA
chr1.22875951.22876346	-0.198026	1	2.18779	0.176653	0.0191029	NA	0.906441	NA
chr1.22902784.22904088	-0.312756	1	0.263527	1	-0.227166	1	-0.616204	1
chr1.22928119.22928992	-1.42271	0.405089	-0.57585	1	-0.192261	1	0.0540137	1
chr1.22931181.22931842	1.46788	0.759856	1.21038	1	1.17735	1	1.60288	1
chr1.22939689.22940516	-2.09877	0.00010673	-1.89045	7.5541e-05	-1.58566	0.00512463	-0.41606	1
chr1.22943385.22943635	-1.21648	0.8474	-0.723886	1	-0.177313	1	-0.104947	1
chr1.22943898.22944398	0.709247	1	0.584715	1	0.603636	1	-0.0247813	1
chr1.22967979.22968288	-0.977182	0.997551	-0.881514	1	-0.541434	1	0.165539	1
chr1.22968947.22969717	0.649328	1	0.451392	1	0.588669	1	0.91141	1
chr1.22975563.22976169	0.40688	1	0.207336	1	1.05626	1	1.0168	1
chr1.23002719.23003309	-0.0767611	1	-0.198366	1	-0.250591	NA	1.4108	1
chr1.23007879.23008597	-1.25903	0.418796	-0.798304	1	-0.753835	1	0.815375	1
chr1.23023529.23024260	-1.66678	0.00490804	-1.83637	0.000116922	-1.60035	0.00380541	0.0517569	1
chr1.23059761.23060344	-0.626957	1	-1.08843	0.788916	-1.09408	0.82263	-0.455237	1
chr1.23061760.23062598	-0.78556	0.732619	-0.888442	0.368155	-0.836296	0.542295	-0.320043	1
chr1.23063225.23063542	0.117888	1	-0.689593	1	-0.295747	1	-0.399687	1
chr1.23063888.23064446	-0.411496	1	-1.34131	0.363091	-1.18006	0.617412	-1.10407	1
chr1.23067731.23068131	1.0204	1	0.665792	1	0.271621	1	0.313358	1
chr1.23084680.23085041	-0.411211	1	-0.83204	1	-0.618664	NA	0.182975	NA
chr1.23091472.23091843	-1.161	0.706502	-1.40419	0.31257	-1.50546	NA	-0.63443	NA
chr1.23098052.23099015	1.89705	0.181948	0.988981	1	1.32351	0.697498	0.985863	1
chr1.23102758.23103258	0.976856	1	0.534393	1	0.840356	1	0.806764	1
chr1.23104326.23105180	-1.40952	0.261079	-0.544348	1	-0.627262	1	0.242805	1
chr1.23115526.23116280	0.87556	1	0.258605	1	0.648394	1	-0.284609	1
chr1.23117350.23118081	0.547011	1	0.382335	1	0.660965	1	0.0631677	1
chr1.23119165.23120112	1.29891	0.17894	0.492521	1	0.76367	1	-0.246337	1
chr1.23124466.23124896	-0.147004	1	-0.222877	1	0.0126838	1	0.7707	1
chr1.23138463.23139280	-0.511314	1	-0.671503	1	-0.675408	1	-0.748189	1
chr1.23140419.23140879	-0.0363884	1	-0.149282	1	-0.640522	1	0.107888	1
chr1.23151664.23152539	-0.875271	0.776409	-0.384138	1	-0.935978	0.60076	0.55668	1
chr1.23152632.23153184	-1.1168	0.800659	-0.960038	0.975144	-1.30426	0.508849	-0.112855	1
chr1.23175404.23175681	-0.633087	1	-0.972933	1	-0.81099	NA	-1.21925	1
chr1.23184564.23185068	-0.376479	1	0.260966	1	-0.405615	1	-1.15143	1
chr1.23187592.23188226	-0.139974	1	0.738009	1	-0.0426164	1	-0.564782	1
chr1.23192717.23193659	-0.580668	1	0.861488	1	-0.410992	1	0.564848	1
chr1.23201948.23203386	-1.27396	0.0563013	-0.822141	0.688887	-0.941301	0.399951	0.599955	1
chr1.23204286.23204961	1.59293	0.402024	1.01575	1	1.31659	0.689277	-1.13115	1
chr1.23207868.23208483	-1.30032	0.209424	-1.30929	0.135639	-0.777639	1	-0.101957	1
chr1.23214449.23215785	-1.40868	0.0658956	-0.142976	1	-1.02138	0.391606	0.177482	1
chr1.23224032.23224310	1.85919	0.703415	1.55016	0.952189	1.53532	NA	1.2751	NA
chr1.23230995.23232327	-1.7297	0.000478787	-1.22224	0.0358789	-1.03146	0.208499	0.552626	1
chr1.23255814.23257464	-0.316952	1	-0.656127	1	-0.496619	1	-0.317291	1
chr1.23263749.23264798	-0.753215	0.786343	-0.878374	0.339617	-0.734805	0.839482	0.509722	1
chr1.23266042.23266472	-1.41125	0.334963	-0.811772	1	-0.727181	1	0.750036	1
chr1.23270980.23272430	-0.53591	1	-0.540696	1	-0.65366	1	0.052733	1
chr1.23284179.23285042	0.944313	0.925644	0.884701	1	0.648889	1	-0.0564127	1
chr1.23286380.23287252	-0.908035	0.352648	-1.15065	0.0252681	-1.0763	0.0712881	-0.603482	1
chr1.23292801.23293034	-1.60805	0.30781	-1.35441	0.403389	-1.55224	NA	-0.206066	NA
chr1.23320496.23322116	-0.30367	1	-0.448047	1	-0.546698	1	-0.949074	1
chr1.23323936.23324579	0.19123	1	0.366181	1	0.3503	1	-0.119725	1
chr1.23332103.23332956	2.70601	0.000952383	0.948254	1	1.72191	0.139076	-0.473616	1
chr1.23337826.23338205	0.193351	1	0.0622365	1	0.525941	1	-0.0441684	1
chr1.23344066.23344757	-0.403951	1	-0.216814	1	-0.702331	1	0.315129	1
chr1.23350261.23350492	-0.208148	1	0.124148	1	0.984569	1	-0.437666	1
chr1.23352962.23353842	2.20679	0.0271458	0.843232	1	0.908447	1	0.129444	1
chr1.23355446.23355672	0.489756	1	1.04175	1	1.5844	NA	0.071985	NA
chr1.23358538.23359897	1.51982	0.110245	1.07224	0.590366	1.53964	0.0933128	0.081847	1
chr1.23365650.23366185	0.297254	1	-0.0294189	1	-0.225119	1	0.20405	1
chr1.23372766.23373234	-0.0419142	1	0.324134	1	-0.281127	1	0.129581	1
chr1.23379587.23380784	0.179475	1	-0.247884	1	-0.0227147	1	0.129481	1
chr1.23382470.23383881	-0.377834	1	-0.508667	1	-0.524367	1	-0.38896	1
chr1.23389689.23390303	-0.931126	0.830954	-0.993567	0.63709	-0.494629	1	-0.443317	1
chr1.23409480.23410519	-0.962858	0.721733	-1.23483	0.209074	-0.76403	1	-0.0906323	1
chr1.23410970.23411855	-0.301009	1	-0.371681	1	-0.135275	1	0.0935375	1
chr1.23433642.23434002	-2.59855	0.0471287	-2.76595	0.00531403	-2.71102	0.0124397	-2.15261	0.397606
chr1.23444043.23444527	0.118794	1	1.66002	0.324461	0.98663	1	0.764676	1
chr1.23462470.23462768	0.334375	1	-0.760136	1	-0.943051	NA	-0.135865	1
chr1.23464065.23464427	2.27916	0.62477	2.23289	0.660283	2.6603	0.447895	3.15075	0.89322
chr1.23484835.23485632	-1.19864	0.443478	-0.830737	1	-0.557636	1	0.324273	1
chr1.23489956.23491553	0.622688	1	0.530974	1	0.688385	1	-0.177565	1
chr1.23494954.23495929	-0.777421	0.772319	-0.98841	0.180572	-0.662326	1	0.200998	1
chr1.23520145.23520776	-0.115808	1	1.96217	0.0963893	0.875766	1	0.863603	1
[truncated: 266,266+ more rows]
