# Supplementary material for: Machine learning sequence prioritization for cell type-specific enhancer design
Source: bioRxiv preprint, doi:10.1101/2021.04.15.439984, version 1 (2021-04-15)
Supplement: Supplemental Table 12 [file 439984_file28.xlsx]

## Sheet: Table S13
Query_ID	Target_ID	Optimal_offset	p-value	E-value	q-value	Overlap	Query_consensus	Target_consensus	Orientation
PfPVvsNEG1.fwd	ERR3_MOUSE.H11MO.0.C	-2	6.96989e-07	0.000249522	0.00048544	10	CTGTGACCTTGAT	GTGACCTTGA	-
PfPVvsNEG1.fwd	RORA_MOUSE.H11MO.0.C	0	1.74345e-05	0.00624154	0.0060714	13	CTGTGACCTTGAT	CCCTGACCTAGTT	-
PfPVvsNEG1.fwd	NR5A2_MOUSE.H11MO.0.A	-3	0.000200647	0.0718317	0.0437401	10	CTGTGACCTTGAT	TGACCTTGAAC	-
PfPVvsNEG1.fwd	ERR1_MOUSE.H11MO.0.A	-3	0.000369877	0.132416	0.0437401	10	CTGTGACCTTGAT	TGACCTTGACCT	-
PfPVvsNEG1.fwd	STF1_MOUSE.H11MO.0.B	-3	0.000388577	0.139111	0.0437401	10	CTGTGACCTTGAT	TGGCCTTGAGC	-
PfPVvsNEG1.fwd	RARA_MOUSE.H11MO.0.A	-3	0.000412525	0.147684	0.0437401	10	CTGTGACCTTGAT	TGACCTTGAACTTCTGACCC	-
PfPVvsNEG1.fwd	NR1D2_MOUSE.H11MO.0.A	2	0.000491494	0.175955	0.0437401	13	CTGTGACCTTGAT	CCCTCTGACCCACTTCCCC	-
PfPVvsNEG1.fwd	NR4A2_MOUSE.H11MO.0.C	-2	0.000502412	0.179863	0.0437401	9	CTGTGACCTTGAT	GTGACCTTT	-
PfPVvsNEG1.fwd	RXRG_MOUSE.H11MO.0.B	-3	0.000782163	0.280014	0.0574808	10	CTGTGACCTTGAT	TGACCTTGAACTCCTGACCCTC	-
PfPVvsNEG1.fwd	RXRB_MOUSE.H11MO.0.C	-1	0.000825302	0.295458	0.0574808	10	CTGTGACCTTGAT	TGTGACCTCA	-
PfPVvsNEG1.fwd	RXRA_MOUSE.H11MO.0.A	-3	0.000943442	0.337752	0.0597356	10	CTGTGACCTTGAT	TGACCTTGAACTCCTGACCCT	-
PfPVvsNEG1.fwd	ERR2_MOUSE.H11MO.0.A	1	0.00121256	0.434097	0.0649636	13	CTGTGACCTTGAT	AGGATGACCTTGAACTT	-
PfPVvsNEG1.fwd	PPARA_MOUSE.H11MO.0.A	4	0.00121256	0.434097	0.0649636	13	CTGTGACCTTGAT	TGACCTTTGACCTAGTT	-
PfPVvsNEG1.fwd	ESR2_MOUSE.H11MO.0.A	6	0.00208586	0.746739	0.103769	9	CTGTGACCTTGAT	AGGTCACCCTGACCT	+
PfPVvsNEG1.fwd	PPARG_MOUSE.H11MO.0.A	4	0.00284092	1.01705	0.125849	13	CTGTGACCTTGAT	TGACCTTTGCCCCACTT	-
PfPVvsNEG1.fwd	NR1D1_MOUSE.H11MO.0.A	2	0.00289107	1.035	0.125849	13	CTGTGACCTTGAT	CCTTCTGACCCACTTCCCT	-
PfPVvsNEG1.fwd	COT1_MOUSE.H11MO.0.B	-3	0.00319133	1.1425	0.127046	9	CTGTGACCTTGAT	TGACCTTTG	-
PfPVvsNEG1.fwd	RARG_MOUSE.H11MO.0.C	9	0.00328339	1.17545	0.127046	9	CTGTGACCTTGAT	CCCAGGTCACTCTGACCT	-
PfPVvsNEG1.fwd	VDR_MOUSE.H11MO.0.A	6	0.00349951	1.25282	0.128151	10	CTGTGACCTTGAT	TGAACCCACTGACCCC	-
PfPVvsNEG1.fwd	RORG_MOUSE.H11MO.0.B	-3	0.00367996	1.31743	0.128151	10	CTGTGACCTTGAT	TGACCCACTTTC	-
PfPVvsNEG1.fwd	NKX28_MOUSE.H11MO.0.C	-4	0.00423901	1.51757	0.14059	9	CTGTGACCTTGAT	GTCCTTGAA	-
PfPVvsNEG1.fwd	COT2_MOUSE.H11MO.0.A	0	0.00467907	1.67511	0.141691	13	CTGTGACCTTGAT	CTCTGACCTTTGG	-
PfPVvsNEG1.fwd	NR2C2_MOUSE.H11MO.0.A	4	0.00467907	1.67511	0.141691	9	CTGTGACCTTGAT	TGACCTTTGACCT	-
PfPVvsNEG1.fwd	ESR1_MOUSE.H11MO.0.A	6	0.00668721	2.39402	0.194064	9	CTGTGACCTTGAT	AGGTCACCCTGACCT	+
PfPVvsNEG1.fwd	PRD14_MOUSE.H11MO.0.A	6	0.00906505	3.24529	0.252546	10	CTGTGACCTTGAT	CAAGGTCTCTAACCCT	-
PfPVvsNEG1.fwd	GFI1_MOUSE.H11MO.0.C	1	0.0139915	5.00897	0.36092	9	CTGTGACCTTGAT	GCTGTGATTT	+
PfPVvsNEG1.fwd	NR1H3_MOUSE.H11MO.0.A	5	0.0156436	5.60039	0.385493	10	CTGTGACCTTGAT	CTGACCTTTGACCTC	-
PfPVvsNEG1.fwd	GFI1B_MOUSE.H11MO.0.A	1	0.016767	6.00258	0.385493	9	CTGTGACCTTGAT	GCTGTGATTT	+
PfPVvsNEG1.fwd	SMAD3_MOUSE.H11MO.0.B	2	0.0174535	6.24834	0.385493	10	CTGTGACCTTGAT	CTCTGTCACCTG	+
PfPVvsNEG1.fwd	NR4A1_MOUSE.H11MO.0.B	-3	0.0177115	6.34073	0.385493	9	CTGTGACCTTGAT	TGACCTTTT	-
PfPVvsNEG1.fwd	HNF4A_MOUSE.H11MO.0.A	4	0.0267619	9.58076	0.564824	10	CTGTGACCTTGAT	TGGACTTTGGCCTT	-
PfPVvsNEG2.fwd	LHX6_MOUSE.H11MO.0.C	-1	4.94607e-05	0.0177069	0.0350581	9	TCTAATCAGGAAC	GTAATCAGC	-
PfPVvsNEG2.fwd	LHX3_MOUSE.H11MO.0.C	-1	0.00106672	0.381887	0.276914	9	TCTAATCAGGAAC	TTAATTAGC	-
PfPVvsNEG2.fwd	VSX2_MOUSE.H11MO.0.C	-1	0.00117202	0.419585	0.276914	12	TCTAATCAGGAAC	TTAATTAGCTTC	+
PfPVvsNEG2.fwd	FOXO1_MOUSE.H11MO.0.A	-1	0.00730479	2.61511	0.752297	10	TCTAATCAGGAAC	GTAAACAGGC	-
PfPVvsNEG2.fwd	MAFB_MOUSE.H11MO.0.B	0	0.00749423	2.68293	0.752297	11	TCTAATCAGGAAC	CTGAGTCAGCA	-
PfPVvsNEG2.fwd	FOXK1_MOUSE.H11MO.0.A	1	0.00848652	3.03818	0.752297	10	TCTAATCAGGAAC	ATGTAAACAAG	-
PfPVvsNEG2.fwd	PRRX2_MOUSE.H11MO.0.C	-1	0.00945682	3.38554	0.752297	7	TCTAATCAGGAAC	TTAATTG	+
PfPVvsNEG2.fwd	FOXO3_MOUSE.H11MO.0.B	0	0.00948775	3.39661	0.752297	10	TCTAATCAGGAAC	TGTAAACAGG	-
PfPVvsNEG2.fwd	HNF1B_MOUSE.H11MO.0.A	1	0.0136117	4.873	0.752297	13	TCTAATCAGGAAC	AGTTAATCATTAACT	-
PfPVvsNEG2.fwd	ISL1_MOUSE.H11MO.0.A	-1	0.0138632	4.96302	0.752297	9	TCTAATCAGGAAC	TCCATTAGC	-
PfPVvsNEG2.fwd	DDIT3_MOUSE.H11MO.0.C	1	0.0147622	5.28487	0.752297	9	TCTAATCAGGAAC	ATTGCATCAT	-
PfPVvsNEG2.fwd	PBX3_MOUSE.H11MO.0.A	3	0.0147952	5.29669	0.752297	11	TCTAATCAGGAAC	CCAGCCAATCAGAG	-
PfPVvsNEG2.fwd	HXB8_MOUSE.H11MO.0.C	2	0.0164958	5.90548	0.752297	9	TCTAATCAGGAAC	GCATTAATCAA	-
PfPVvsNEG2.fwd	HXB7_MOUSE.H11MO.0.C	1	0.0199941	7.15789	0.752297	9	TCTAATCAGGAAC	CATTAATCAA	-
PfPVvsNEG2.fwd	ZIC2_MOUSE.H11MO.0.C	0	0.0200554	7.17984	0.752297	13	TCTAATCAGGAAC	TCTCAGCAGGGGGCC	-
PfPVvsNEG2.fwd	HXB4_MOUSE.H11MO.0.A	-1	0.0206104	7.37853	0.752297	8	TCTAATCAGGAAC	TTAATGGC	+
PfPVvsNEG2.fwd	FOXA2_MOUSE.H11MO.0.A	2	0.0214749	7.68802	0.752297	11	TCTAATCAGGAAC	AAAGTAAACAAGG	-
PfPVvsNEG2.fwd	SRF_MOUSE.H11MO.0.A	4	0.0218329	7.81618	0.752297	13	TCTAATCAGGAAC	ATGGCCAAATAAGGAAA	-
PfPVvsNEG2.fwd	DLX3_MOUSE.H11MO.0.C	0	0.0225077	8.05775	0.752297	10	TCTAATCAGGAAC	TGTAATTATC	-
PfPVvsNEG2.fwd	FOXO4_MOUSE.H11MO.0.C	-3	0.0229586	8.21917	0.752297	9	TCTAATCAGGAAC	AATAAACAA	-
PfPVvsNEG2.fwd	PROP1_MOUSE.H11MO.0.C	3	0.0233498	8.35922	0.752297	8	TCTAATCAGGAAC	TAATTCAATTA	-
PfPVvsNEG2.fwd	NFYC_MOUSE.H11MO.0.B	3	0.0269241	9.63881	0.774564	11	TCTAATCAGGAAC	TCAGCCAATCAGAA	+
PfPVvsNEG2.fwd	FOXP2_MOUSE.H11MO.0.A	0	0.0274907	9.84169	0.774564	9	TCTAATCAGGAAC	AGTAAACAA	-
PfPVvsNEG2.fwd	EHF_MOUSE.H11MO.0.B	-2	0.0276475	9.8978	0.774564	11	TCTAATCAGGAAC	GAACCAGGAAGTGGC	+
PfPVvsNEG3.fwd	TFE2_MOUSE.H11MO.0.A	-1	2.45946e-07	8.80487e-05	0.000172286	11	GCTGCAGCTGTGT	CTGCAGCTGTG	-
PfPVvsNEG3.fwd	MYF6_MOUSE.H11MO.0.C	-3	3.87766e-05	0.013882	0.0107246	7	GCTGCAGCTGTGT	GCAGCTG	-
PfPVvsNEG3.fwd	MYOG_MOUSE.H11MO.0.A	-1	4.59294e-05	0.0164427	0.0107246	12	GCTGCAGCTGTGT	CCGCAGCTGTCCC	+
PfPVvsNEG3.fwd	ASCL1_MOUSE.H11MO.0.A	-1	6.95371e-05	0.0248943	0.0121777	12	GCTGCAGCTGTGT	CTGCAGCTGCCCCC	+
PfPVvsNEG3.fwd	SNAI2_MOUSE.H11MO.0.A	-1	0.000183182	0.065579	0.0242303	11	GCTGCAGCTGTGT	ATGCACCTGCC	-
PfPVvsNEG3.fwd	ITF2_MOUSE.H11MO.0.B	-2	0.000273545	0.097929	0.0242303	9	GCTGCAGCTGTGT	TGCACCTGG	-
PfPVvsNEG3.fwd	HEN1_MOUSE.H11MO.0.C	3	0.000291746	0.104445	0.0242303	13	GCTGCAGCTGTGT	TGGGGAGCAGCTGCGTCCCT	+
PfPVvsNEG3.fwd	BHA15_MOUSE.H11MO.0.A	0	0.000307961	0.11025	0.0242303	11	GCTGCAGCTGTGT	GCAGCAGCTGG	+
PfPVvsNEG3.fwd	ASCL2_MOUSE.H11MO.0.C	-2	0.000438043	0.156819	0.026089	9	GCTGCAGCTGTGT	AGCAGCTGG	-
PfPVvsNEG3.fwd	LYL1_MOUSE.H11MO.0.A	-3	0.000446919	0.159997	0.026089	10	GCTGCAGCTGTGT	CCAGCTGTTTCCTG	+
PfPVvsNEG3.fwd	MYOD1_MOUSE.H11MO.0.A	-3	0.000669682	0.239746	0.0360857	10	GCTGCAGCTGTGT	GCAGCTGTTCCTGTC	+
PfPVvsNEG3.fwd	PTF1A_MOUSE.H11MO.0.A	-3	0.000969508	0.347084	0.0452762	10	GCTGCAGCTGTGT	CCAGCTGCCCCCTTTCCC	+
PfPVvsNEG3.fwd	OLIG2_MOUSE.H11MO.0.A	-3	0.00224791	0.804751	0.0926273	10	GCTGCAGCTGTGT	CCAGCTGTTTCCCTTCTG	+
PfPVvsNEG3.fwd	ATOH1_MOUSE.H11MO.0.B	-3	0.00279919	1.00211	0.108936	9	GCTGCAGCTGTGT	CCATCTGCT	-
PfPVvsNEG3.fwd	TGIF1_MOUSE.H11MO.0.A	-4	0.00432452	1.54818	0.159439	9	GCTGCAGCTGTGT	CAGCTGTCA	-
PfPVvsNEG3.fwd	HTF4_MOUSE.H11MO.0.A	-2	0.0102785	3.67969	0.313449	10	GCTGCAGCTGTGT	AGCAGGTGGG	+
PfPVvsNEG3.fwd	PRDM9_MOUSE.H11MO.0.C	2	0.0102916	3.68441	0.313449	13	GCTGCAGCTGTGT	CAGATGCTGCTGCCATCTT	-
PfPVvsNEG3.fwd	SNAI1_MOUSE.H11MO.0.C	-3	0.0143323	5.13098	0.401594	8	GCTGCAGCTGTGT	CCAGGTGG	+
PfPVvsNEG3.fwd	TWST1_MOUSE.H11MO.0.B	6	0.0173105	6.19716	0.466386	11	GCTGCAGCTGTGT	TAATTAAAACCAGATGT	-
PfPVvsNEG4.fwd	DLX3_MOUSE.H11MO.0.C	-1	0.000919591	0.329213	0.44444	10	TCCTAATTTCCTC	GATAATTACA	+
PfPVvsNEG4.fwd	VSX2_MOUSE.H11MO.0.C	-2	0.00270529	0.968494	0.44444	11	TCCTAATTTCCTC	TTAATTAGCTTC	+
PfPVvsNEG4.fwd	GATA6_MOUSE.H11MO.0.A	-1	0.00306633	1.09774	0.44444	10	TCCTAATTTCCTC	CCTTATCTCC	-
PfPVvsNEG4.fwd	MEF2D_MOUSE.H11MO.0.A	0	0.00335156	1.19986	0.44444	13	TCCTAATTTCCTC	TGCTATTTTTAGCT	+
PfPVvsNEG4.fwd	ALX1_MOUSE.H11MO.0.B	-2	0.00406388	1.45487	0.44444	11	TCCTAATTTCCTC	ATAATTGGATTA	+
PfPVvsNEG4.fwd	PRRX2_MOUSE.H11MO.0.C	-2	0.00458542	1.64158	0.44444	7	TCCTAATTTCCTC	TTAATTG	+
PfPVvsNEG4.fwd	MEF2C_MOUSE.H11MO.0.A	1	0.0052095	1.865	0.44444	13	TCCTAATTTCCTC	GTTCTATTTTTAGCT	+
PfPVvsNEG4.fwd	MEF2A_MOUSE.H11MO.0.A	0	0.00567734	2.03249	0.44444	13	TCCTAATTTCCTC	TTCTATTTTTAGCA	+
PfPVvsNEG4.fwd	NOBOX_MOUSE.H11MO.0.C	-2	0.00597236	2.13811	0.44444	9	TCCTAATTTCCTC	CTAATTGGT	+
PfPVvsNEG4.fwd	NFAC1_MOUSE.H11MO.0.A	3	0.00632121	2.26299	0.44444	12	TCCTAATTTCCTC	GACTCATATTTTCCA	-
PfPVvsNEG4.fwd	HXB4_MOUSE.H11MO.0.A	-2	0.00892525	3.19524	0.57048	8	TCCTAATTTCCTC	TTAATGGC	+
PfPVvsNEG4.fwd	PROP1_MOUSE.H11MO.0.C	-3	0.0106332	3.80668	0.591034	10	TCCTAATTTCCTC	TAATTGAATTA	+
PfPVvsNEG4.fwd	NFAC4_MOUSE.H11MO.0.C	-2	0.0111264	3.98326	0.591034	10	TCCTAATTTCCTC	AAATTTTCCT	-
PfPVvsNEG4.fwd	LHX2_MOUSE.H11MO.0.A	-1	0.0126315	4.52209	0.591034	10	TCCTAATTTCCTC	ACTAATTAAC	-
PfPVvsNEG4.fwd	FOXO1_MOUSE.H11MO.0.A	0	0.0134499	4.81507	0.591034	10	TCCTAATTTCCTC	GCCTGTTTAC	+
PfPVvsNEG4.fwd	CRX_MOUSE.H11MO.0.A	-1	0.0150327	5.38171	0.605435	12	TCCTAATTTCCTC	CCTAATCCTCTTA	-
PfPVvsNEG4.fwd	GATA2_MOUSE.H11MO.0.A	0	0.0162981	5.83472	0.605435	11	TCCTAATTTCCTC	TTCTTATCTGT	-
PfPVvsNEG4.fwd	LHX6_MOUSE.H11MO.0.C	-1	0.0175888	6.29678	0.605435	9	TCCTAATTTCCTC	GCTGATTAC	+
PfPVvsNEG4.fwd	DDIT3_MOUSE.H11MO.0.C	-5	0.0182908	6.54812	0.605435	8	TCCTAATTTCCTC	ATTGCATCAT	-
PfPVvsNEG4.fwd	LHX3_MOUSE.H11MO.0.C	-1	0.0212375	7.60302	0.605435	9	TCCTAATTTCCTC	GCTAATTAA	+
PfPVvsNEG4.fwd	HNF1A_MOUSE.H11MO.0.A	3	0.023706	8.48675	0.605435	12	TCCTAATTTCCTC	GGTTAATAATTAACC	+
PfPVvsNEG4.fwd	CDX2_MOUSE.H11MO.0.A	-1	0.0241482	8.64507	0.605435	12	TCCTAATTTCCTC	TTTTATGGCCTT	+
PfPVvsNEG4.fwd	HNF1B_MOUSE.H11MO.0.A	3	0.0250784	8.97806	0.605435	12	TCCTAATTTCCTC	AGTTAATGATTAACT	+
PfPVvsNEG4.fwd	BARX1_MOUSE.H11MO.0.C	-1	0.0255501	9.14692	0.605435	12	TCCTAATTTCCTC	TTTAATTGTTTT	+
PfPVvsNEG4.fwd	FOXA2_MOUSE.H11MO.0.A	-1	0.0266757	9.54992	0.605435	12	TCCTAATTTCCTC	CCTTGTTTACTTT	+
PfPVvsNEG4.fwd	IRF4_MOUSE.H11MO.0.A	1	0.0270803	9.69476	0.605435	13	TCCTAATTTCCTC	AGTTTCAGTTCCTCTTTT	-
PfPVvsNEG4.fwd	FOXO3_MOUSE.H11MO.0.B	-1	0.0276438	9.89649	0.605435	10	TCCTAATTTCCTC	CCTGTTTACA	+
PfPVvsNEG5.fwd	ETV4_MOUSE.H11MO.0.B	-3	0.00018661	0.0668065	0.131199	8	AGTCAGGAAGCTG	CAGGAAGT	+
PfPVvsNEG5.fwd	ERG_MOUSE.H11MO.0.A	0	0.00167602	0.600017	0.410123	13	AGTCAGGAAGCTG	GGACCGGAAGTGGG	+
PfPVvsNEG5.fwd	ETV2_MOUSE.H11MO.0.A	2	0.00179286	0.641845	0.410123	13	AGTCAGGAAGCTG	GGAAACAGGAAGTGGG	+
PfPVvsNEG5.fwd	ETS1_MOUSE.H11MO.0.A	1	0.00233336	0.835341	0.410123	13	AGTCAGGAAGCTG	GGGACAGGAAGTGG	+
PfPVvsNEG5.fwd	ETV6_MOUSE.H11MO.0.C	-2	0.0032002	1.14567	0.428281	9	AGTCAGGAAGCTG	ACAGGAAGT	+
PfPVvsNEG5.fwd	LYL1_MOUSE.H11MO.0.A	-3	0.00365499	1.30849	0.428281	10	AGTCAGGAAGCTG	CAGGAAACAGCTGG	-
PfPVvsNEG5.fwd	FLI1_MOUSE.H11MO.0.A	1	0.00440938	1.57856	0.442867	13	AGTCAGGAAGCTG	GGGGCCGGAAGTGG	+
PfPVvsNEG5.fwd	NR2E3_MOUSE.H11MO.0.C	2	0.00857858	3.07113	0.477045	12	AGTCAGGAAGCTG	AAAGTCAAAAGTCA	+
PfPVvsNEG5.fwd	INSM1_MOUSE.H11MO.0.C	0	0.00896159	3.20825	0.477045	12	AGTCAGGAAGCTG	TGTCAGGGGGCA	+
PfPVvsNEG5.fwd	E2F3_MOUSE.H11MO.0.A	0	0.00919423	3.29153	0.477045	10	AGTCAGGAAGCTG	GGGCGGGAGG	+
PfPVvsNEG5.fwd	MITF_MOUSE.H11MO.0.A	0	0.00919423	3.29153	0.477045	10	AGTCAGGAAGCTG	AGTCACGTGG	-
PfPVvsNEG5.fwd	SMAD3_MOUSE.H11MO.0.B	-3	0.00950883	3.40416	0.477045	10	AGTCAGGAAGCTG	CAGGTGACAGAG	-
PfPVvsNEG5.fwd	MAFF_MOUSE.H11MO.0.A	10	0.00980352	3.50966	0.477045	12	AGTCAGGAAGCTG	AAAAATGCTGACTCAGCAAAAA	+
PfPVvsNEG5.fwd	MAFB_MOUSE.H11MO.0.B	3	0.00981791	3.51481	0.477045	8	AGTCAGGAAGCTG	CTGAGTCAGCA	-
PfPVvsNEG5.fwd	ELK4_MOUSE.H11MO.0.B	0	0.0101779	3.64369	0.477045	13	AGTCAGGAAGCTG	GGACCGGAAGCGG	+
PfPVvsNEG5.fwd	ZN335_MOUSE.H11MO.0.A	-2	0.0110498	3.95583	0.485543	11	AGTCAGGAAGCTG	TCAGGCAGCGCCGAGGACAGCC	-
PfPVvsNEG5.fwd	MAF_MOUSE.H11MO.0.A	5	0.0119001	4.26024	0.492148	12	AGTCAGGAAGCTG	TGCTGAGTCAGCAAATT	-
PfPVvsNEG5.fwd	EHF_MOUSE.H11MO.0.B	1	0.014694	5.26046	0.494592	13	AGTCAGGAAGCTG	GAACCAGGAAGTGGC	+
PfPVvsNEG5.fwd	PTF1A_MOUSE.H11MO.0.A	1	0.0150959	5.40432	0.494592	13	AGTCAGGAAGCTG	GGGAAAGGGGGCAGCTGG	-
PfPVvsNEG5.fwd	NR1D1_MOUSE.H11MO.0.A	9	0.0168405	6.02888	0.494592	10	AGTCAGGAAGCTG	AGGGAAGTGGGTCAGAAGG	+
PfPVvsNEG5.fwd	PAX6_MOUSE.H11MO.0.C	0	0.0168834	6.04426	0.494592	12	AGTCAGGAAGCTG	AGTCAAGCGGAA	-
PfPVvsNEG5.fwd	NF2L2_MOUSE.H11MO.0.A	3	0.0170191	6.09282	0.494592	11	AGTCAGGAAGCTG	ATGACTCAGCAATT	+
PfPVvsNEG5.fwd	ZIC2_MOUSE.H11MO.0.C	3	0.0173665	6.21719	0.494592	12	AGTCAGGAAGCTG	TCTCAGCAGGGGGCC	-
PfPVvsNEG5.fwd	BACH2_MOUSE.H11MO.0.A	3	0.0175762	6.29229	0.494592	8	AGTCAGGAAGCTG	ATGACTCAGCA	-
PfPVvsNEG5.fwd	E2F6_MOUSE.H11MO.0.A	1	0.0178506	6.39053	0.494592	11	AGTCAGGAAGCTG	TGGGCGGGAAGG	+
PfPVvsNEG5.fwd	MAFG_MOUSE.H11MO.0.A	5	0.0188937	6.76396	0.494592	13	AGTCAGGAAGCTG	TGCTGAGTCAGCAATTTT	-
PfPVvsNEG5.fwd	STAT6_MOUSE.H11MO.0.A	4	0.0189941	6.79987	0.494592	10	AGTCAGGAAGCTG	CAGTTCTCAGGAAA	-
PfPVvsNEG5.fwd	ELF3_MOUSE.H11MO.0.B	1	0.0211722	7.57964	0.531619	13	AGTCAGGAAGCTG	GAACCAGGAAGTGG	+
PfPVvsNEG5.fwd	ZIC3_MOUSE.H11MO.0.A	3	0.024055	8.61168	0.583176	12	AGTCAGGAAGCTG	TCACAGCAGGGGGCC	-
PfPVvsNEG5.fwd	NKX21_MOUSE.H11MO.0.A	2	0.0270824	9.69548	0.607466	8	AGTCAGGAAGCTG	CCACTCAAGA	-
PfPVvsNEG5.fwd	NFE2_MOUSE.H11MO.0.A	3	0.0276312	9.89198	0.607466	11	AGTCAGGAAGCTG	ATGACTCAGCAGTT	+
PfPVvsNEG5.fwd	OLIG2_MOUSE.H11MO.0.A	1	0.027649	9.89833	0.607466	13	AGTCAGGAAGCTG	CAGAAGGGAAACAGCTGG	-
PfPVvsNEG6.fwd	TFE2_MOUSE.H11MO.0.A	-4	0.00282802	1.01243	0.840913	9	CAGCCTGCAGCTT	CTGCAGCTGTG	-
PfPVvsNEG6.fwd	TBX20_MOUSE.H11MO.0.C	2	0.00448621	1.60606	0.840913	12	CAGCCTGCAGCTT	ACCTGTCAGCACCT	-
PfPVvsNEG6.fwd	MAF_MOUSE.H11MO.0.A	4	0.00510076	1.82607	0.840913	13	CAGCCTGCAGCTT	TGCTGAGTCAGCAAATT	-
PfPVvsNEG6.fwd	SMAD3_MOUSE.H11MO.0.B	2	0.00562081	2.01225	0.840913	10	CAGCCTGCAGCTT	CTCTGTCACCTG	+
PfPVvsNEG6.fwd	MAFG_MOUSE.H11MO.0.A	4	0.00701164	2.51017	0.840913	13	CAGCCTGCAGCTT	TGCTGAGTCAGCAATTTT	-
PfPVvsNEG6.fwd	ASCL1_MOUSE.H11MO.0.A	-4	0.00747197	2.67497	0.840913	9	CAGCCTGCAGCTT	CTGCAGCTGCCCCC	+
PfPVvsNEG6.fwd	MAFF_MOUSE.H11MO.0.A	8	0.00970526	3.47448	0.840913	13	CAGCCTGCAGCTT	TTTTTGCTGAGTCAGCATTTTT	-
PfPVvsNEG6.fwd	NFE2_MOUSE.H11MO.0.A	2	0.0121733	4.35803	0.840913	12	CAGCCTGCAGCTT	ATGACTCAGCAGTT	+
PfPVvsNEG6.fwd	MAFK_MOUSE.H11MO.0.A	6	0.0125339	4.48714	0.840913	13	CAGCCTGCAGCTT	AATGCTGACTCAGCAGTTTT	-
PfPVvsNEG6.fwd	SMAD2_MOUSE.H11MO.0.A	1	0.0126754	4.53779	0.840913	8	CAGCCTGCAGCTT	TCTGTCTGG	+
PfPVvsNEG6.fwd	TAF1_MOUSE.H11MO.0.A	0	0.012919	4.62502	0.840913	13	CAGCCTGCAGCTT	CCGCCGCCATCTTG	-
PfPVvsNEG6.fwd	NFIB_MOUSE.H11MO.0.C	-2	0.0187044	6.69618	1	9	CAGCCTGCAGCTT	CCTGGCAGC	+
PfPVvsNEG6.fwd	ZN335_MOUSE.H11MO.0.A	2	0.0200014	7.16051	1	13	CAGCCTGCAGCTT	GGCTGTCCTCGGCGCTGCCTGA	+
PfPVvsNEG6.fwd	MYOG_MOUSE.H11MO.0.A	-4	0.022144	7.92757	1	9	CAGCCTGCAGCTT	CCGCAGCTGTCCC	+
PfPVvsNEG6.fwd	BHA15_MOUSE.H11MO.0.A	-3	0.0237257	8.49379	1	10	CAGCCTGCAGCTT	CCAGCTGCTGC	-
PfPVvsNEG7.fwd	MEF2C_MOUSE.H11MO.0.A	2	4.97657e-08	1.78161e-05	3.52611e-05	13	CTATAAATAGACC	AGCTAAAAATAGAAC	-
PfPVvsNEG7.fwd	MEF2D_MOUSE.H11MO.0.A	2	2.79886e-07	0.000100199	9.91557e-05	12	CTATAAATAGACC	AGCTAAAAATAGCA	-
PfPVvsNEG7.fwd	MEF2A_MOUSE.H11MO.0.A	2	8.59093e-07	0.000307555	0.000202901	12	CTATAAATAGACC	TGCTAAAAATAGAA	-
PfPVvsNEG7.fwd	TBP_MOUSE.H11MO.0.A	0	0.000352865	0.126326	0.0625049	10	CTATAAATAGACC	CTATAAAAGG	+
PfPVvsNEG7.fwd	CDX1_MOUSE.H11MO.0.C	0	0.000870828	0.311756	0.123404	8	CTATAAATAGACC	ACATAAAT	-
PfPVvsNEG7.fwd	FOXJ2_MOUSE.H11MO.0.C	-3	0.00237084	0.848762	0.239978	10	CTATAAATAGACC	TAAATAAACA	-
PfPVvsNEG7.fwd	DLX5_MOUSE.H11MO.0.C	2	0.00324805	1.1628	0.283144	9	CTATAAATAGACC	ACCTATAATTA	-
PfPVvsNEG7.fwd	FOXJ3_MOUSE.H11MO.0.A	-1	0.00359653	1.28756	0.283144	12	CTATAAATAGACC	AAAAAATAAACAA	-
PfPVvsNEG7.fwd	FOXO1_MOUSE.H11MO.0.A	-2	0.00435555	1.55929	0.299678	10	CTATAAATAGACC	GTAAACAGGC	-
PfPVvsNEG7.fwd	SRF_MOUSE.H11MO.0.A	4	0.0089452	3.20238	0.487543	13	CTATAAATAGACC	ATGGCCAAATAAGGAAA	-
PfPVvsNEG7.fwd	HNF1A_MOUSE.H11MO.0.A	2	0.0104653	3.74657	0.494443	13	CTATAAATAGACC	GGTTAATAATTAACC	+
PfPVvsNEG7.fwd	HXA9_MOUSE.H11MO.0.B	0	0.0104675	3.74735	0.494443	11	CTATAAATAGACC	CCATAAATCAT	-
PfPVvsNEG7.fwd	HNF6_MOUSE.H11MO.0.A	0	0.0132136	4.73045	0.585148	11	CTATAAATAGACC	AAATCAATAAA	-
PfPVvsNEG7.fwd	SP7_MOUSE.H11MO.0.A	5	0.0144562	5.17533	0.602522	9	CTATAAATAGACC	CAAACCTGTAATTA	+
PfPVvsNEG7.fwd	CDX4_MOUSE.H11MO.0.A	2	0.0153848	5.50775	0.605598	10	CTATAAATAGACC	GGCCATAAATCA	-
PfPVvsNEG7.fwd	HAND1_MOUSE.H11MO.0.C	3	0.0164323	5.88275	0.612788	13	CTATAAATAGACC	TGACAAAAACCAGACCC	-
PfPVvsNEG7.fwd	FOXL2_MOUSE.H11MO.0.C	-2	0.0196685	7.04133	0.632558	11	CTATAAATAGACC	AAATGTAAACA	-
PfPVvsNEG7.fwd	EVX1_MOUSE.H11MO.0.C	3	0.0197655	7.07606	0.632558	10	CTATAAATAGACC	AGGCCATAAATCA	-
PfPVvsNEG7.fwd	SOX5_MOUSE.H11MO.0.C	-1	0.0198662	7.11211	0.632558	8	CTATAAATAGACC	TAACAATA	-
PfPVvsNEG7.fwd	FOXO3_MOUSE.H11MO.0.B	-1	0.0205335	7.35098	0.632558	10	CTATAAATAGACC	TGTAAACAGG	-
PfPVvsNEG7.fwd	FOXP2_MOUSE.H11MO.0.A	-1	0.0232442	8.32144	0.672918	9	CTATAAATAGACC	AGTAAACAA	-
PfPVvsNEG7.fwd	ALX1_MOUSE.H11MO.0.B	-2	0.023743	8.50001	0.672918	11	CTATAAATAGACC	ATAATTGGATTA	+
PfPVvsNEG8.fwd	MAFB_MOUSE.H11MO.0.B	-3	0.000687245	0.246034	0.19013	10	ATCTGCTGACTTC	TGCTGACTCAG	+
PfPVvsNEG8.fwd	MAF_MOUSE.H11MO.0.A	1	0.000894879	0.320367	0.19013	13	ATCTGCTGACTTC	AATTTGCTGACTCAGCA	+
PfPVvsNEG8.fwd	TBX20_MOUSE.H11MO.0.C	0	0.00107631	0.385319	0.19013	13	ATCTGCTGACTTC	AGGTGCTGACAGGT	+
PfPVvsNEG8.fwd	NFE2_MOUSE.H11MO.0.A	0	0.00107631	0.385319	0.19013	13	ATCTGCTGACTTC	AACTGCTGAGTCAT	-
PfPVvsNEG8.fwd	MAFK_MOUSE.H11MO.0.A	2	0.00151637	0.54286	0.214293	13	ATCTGCTGACTTC	AAAACTGCTGAGTCAGCATT	+
PfPVvsNEG8.fwd	MAFG_MOUSE.H11MO.0.A	2	0.00190271	0.681169	0.224075	13	ATCTGCTGACTTC	AAAATTGCTGACTCAGCA	+
PfPVvsNEG8.fwd	MAFF_MOUSE.H11MO.0.A	2	0.00333116	1.19255	0.288539	13	ATCTGCTGACTTC	AAAAATGCTGACTCAGCAAAAA	+
PfPVvsNEG8.fwd	NF2L2_MOUSE.H11MO.0.A	0	0.00343357	1.22922	0.288539	13	ATCTGCTGACTTC	AATTGCTGAGTCAT	-
PfPVvsNEG8.fwd	BACH2_MOUSE.H11MO.0.A	-3	0.00367514	1.3157	0.288539	10	ATCTGCTGACTTC	TGCTGAGTCAT	+
PfPVvsNEG8.fwd	PTF1A_MOUSE.H11MO.0.A	2	0.00462958	1.65739	0.327126	13	ATCTGCTGACTTC	CCAGCTGCCCCCTTTCCC	+
PfPVvsNEG8.fwd	NR2E3_MOUSE.H11MO.0.C	1	0.00708466	2.53631	0.441627	13	ATCTGCTGACTTC	TGACTTTTGACTTT	-
PfPVvsNEG8.fwd	PRDM9_MOUSE.H11MO.0.C	4	0.00750005	2.68502	0.441627	13	ATCTGCTGACTTC	CAGATGCTGCTGCCATCTT	-
PfPVvsNEG8.fwd	BACH1_MOUSE.H11MO.0.C	-3	0.00893732	3.19956	0.476929	10	ATCTGCTGACTTC	TGCTGAGTCATGGT	+
PfPVvsNEG8.fwd	LHX6_MOUSE.H11MO.0.C	-4	0.0105794	3.78743	0.491255	9	ATCTGCTGACTTC	GCTGATTAC	+
PfPVvsNEG8.fwd	CREB1_MOUSE.H11MO.0.A	-3	0.0111238	3.98233	0.491255	10	ATCTGCTGACTTC	CGATGACGTCA	+
PfPVvsNEG8.fwd	HEN1_MOUSE.H11MO.0.C	5	0.0140316	5.02332	0.523457	13	ATCTGCTGACTTC	TGGGGAGCAGCTGCGTCCCT	+
PfPVvsNEG8.fwd	CREM_MOUSE.H11MO.0.C	-3	0.0140754	5.039	0.523457	10	ATCTGCTGACTTC	CACTGACGTCA	+
PfPVvsNEG8.fwd	ATF2_MOUSE.H11MO.0.A	-4	0.0149197	5.34124	0.527111	9	ATCTGCTGACTTC	GATGACGTCAT	+
PfPVvsNEG8.fwd	THA_MOUSE.H11MO.0.C	3	0.0202077	7.23435	0.634192	13	ATCTGCTGACTTC	GAGGTCATCTGAGGACA	+
PfPVvsNEG8.fwd	ATF1_MOUSE.H11MO.0.B	-5	0.0203332	7.27929	0.634192	8	ATCTGCTGACTTC	CTGACGTCAC	+
PfPVvsNEG8.fwd	OLIG2_MOUSE.H11MO.0.A	2	0.0206431	7.39024	0.634192	13	ATCTGCTGACTTC	CCAGCTGTTTCCCTTCTG	+
PfPVvsNEG9.fwd	MAFB_MOUSE.H11MO.0.B	-1	1.55584e-07	5.56992e-05	0.000107321	11	CTGCTGACTCATG	TGCTGACTCAG	+
PfPVvsNEG9.fwd	MAFG_MOUSE.H11MO.0.A	4	3.07057e-06	0.00109926	0.00105903	13	CTGCTGACTCATG	AAAATTGCTGACTCAGCA	+
PfPVvsNEG9.fwd	MAF_MOUSE.H11MO.0.A	3	6.55989e-06	0.00234844	0.00150833	13	CTGCTGACTCATG	AATTTGCTGACTCAGCA	+
PfPVvsNEG9.fwd	BACH1_MOUSE.H11MO.0.C	-1	9.85197e-06	0.00352701	0.00160856	12	CTGCTGACTCATG	TGCTGAGTCATGGT	+
PfPVvsNEG9.fwd	NFE2_MOUSE.H11MO.0.A	2	1.42446e-05	0.00509956	0.00160856	12	CTGCTGACTCATG	AACTGCTGAGTCAT	-
PfPVvsNEG9.fwd	BACH2_MOUSE.H11MO.0.A	-1	1.60969e-05	0.00576268	0.00160856	11	CTGCTGACTCATG	TGCTGAGTCAT	+
PfPVvsNEG9.fwd	MAFK_MOUSE.H11MO.0.A	4	1.79609e-05	0.00642999	0.00160856	13	CTGCTGACTCATG	AAAACTGCTGAGTCAGCATT	+
PfPVvsNEG9.fwd	NF2L2_MOUSE.H11MO.0.A	2	1.86555e-05	0.00667866	0.00160856	12	CTGCTGACTCATG	AATTGCTGAGTCAT	-
PfPVvsNEG9.fwd	MAFF_MOUSE.H11MO.0.A	3	3.19619e-05	0.0114424	0.00244969	13	CTGCTGACTCATG	TTTTTGCTGAGTCAGCATTTTT	-
PfPVvsNEG9.fwd	ATF3_MOUSE.H11MO.0.A	-3	5.23706e-05	0.0187487	0.0036125	9	CTGCTGACTCATG	GTGACTCAT	-
PfPVvsNEG9.fwd	FOSB_MOUSE.H11MO.0.A	-3	0.000106384	0.0380855	0.00571949	9	CTGCTGACTCATG	ATGACTCAT	-
PfPVvsNEG9.fwd	JUNB_MOUSE.H11MO.0.A	-3	0.000193739	0.0693586	0.00954574	9	CTGCTGACTCATG	GTGACTCAT	-
PfPVvsNEG9.fwd	FOSL2_MOUSE.H11MO.0.A	-2	0.000432991	0.155011	0.0186672	11	CTGCTGACTCATG	GGTGACTCATC	-
PfPVvsNEG9.fwd	FOSL1_MOUSE.H11MO.0.A	-2	0.00109947	0.39361	0.0421338	11	CTGCTGACTCATG	GGTGACTCATCC	-
PfPVvsNEG9.fwd	FOS_MOUSE.H11MO.0.A	-2	0.00263949	0.944938	0.0910355	11	CTGCTGACTCATG	GATGACTCATCC	-
PfPVvsNEG9.fwd	JUN_MOUSE.H11MO.0.A	-2	0.00329092	1.17815	0.103185	10	CTGCTGACTCATG	GGTGAGTCAC	+
PfPVvsNEG9.fwd	LYL1_MOUSE.H11MO.0.A	1	0.0060558	2.16798	0.160664	13	CTGCTGACTCATG	CCAGCTGTTTCCTG	+
PfPVvsNEG9.fwd	FOXA1_MOUSE.H11MO.0.A	-1	0.00641665	2.29716	0.163933	10	CTGCTGACTCATG	TGTTTACATA	+
PfPVvsNEG9.fwd	FOXA3_MOUSE.H11MO.0.A	1	0.00706473	2.52917	0.174044	12	CTGCTGACTCATG	CTTGTTTACTTTG	+
PfPVvsNEG9.fwd	NR1D1_MOUSE.H11MO.0.A	1	0.00986627	3.53212	0.226857	13	CTGCTGACTCATG	CCTTCTGACCCACTTCCCT	-
PfPVvsNEG9.fwd	JUND_MOUSE.H11MO.0.A	-3	0.0122358	4.38041	0.263756	10	CTGCTGACTCATG	ATGACTCACCC	-
PfPVvsNEG9.fwd	COT2_MOUSE.H11MO.0.A	-1	0.0126404	4.52528	0.264222	12	CTGCTGACTCATG	CTCTGACCTTTGG	-
PfPVvsNEG9.fwd	FOXA2_MOUSE.H11MO.0.A	2	0.0176591	6.32196	0.336068	11	CTGCTGACTCATG	CCTTGTTTACTTT	+
PfPVvsNEG9.fwd	BATF_MOUSE.H11MO.0.A	-3	0.0183809	6.58036	0.336068	10	CTGCTGACTCATG	CTGAGTCATTTCGAAACT	-
PfPVvsNEG9.fwd	PO3F1_MOUSE.H11MO.0.C	1	0.0185136	6.62785	0.336068	13	CTGCTGACTCATG	CTTGAATATTCATGAG	-
PfPVvsNEG9.fwd	FOXC1_MOUSE.H11MO.0.C	2	0.0195441	6.99679	0.337129	13	CTGCTGACTCATG	CGTTGTTTACTTAAG	+
PfPVvsNEG9.fwd	PO3F2_MOUSE.H11MO.0.A	1	0.0195495	6.99872	0.337129	13	CTGCTGACTCATG	TATGCATATGCATGAG	-
PfPVvsNEG9.fwd	NR1D2_MOUSE.H11MO.0.A	1	0.0216942	7.76653	0.36499	13	CTGCTGACTCATG	CCCTCTGACCCACTTCCCC	-
PfPVvsNEG9.fwd	FOXP2_MOUSE.H11MO.0.A	0	0.0223193	7.9903	0.366565	9	CTGCTGACTCATG	TTGTTTACT	+
PfPVvsNEG9.fwd	COT1_MOUSE.H11MO.0.B	-4	0.0236841	8.47891	0.379935	9	CTGCTGACTCATG	TGACCTTTG	-
PfPVvsNEG9.fwd	FOXD3_MOUSE.H11MO.0.C	1	0.0255239	9.13757	0.391896	13	CTGCTGACTCATG	TTTGTTTACTTAGCA	+
PfPVvsNEG10.fwd	COE1_MOUSE.H11MO.0.A	0	0.000257384	0.0921436	0.122209	13	GGCCCCTGGGATC	GTCCCCAGGGACT	-
PfPVvsNEG10.fwd	PRD16_MOUSE.H11MO.0.B	-1	0.000342049	0.122453	0.122209	10	GGCCCCTGGGATC	TCCCCTGGGG	-
PfPVvsNEG10.fwd	VDR_MOUSE.H11MO.0.A	2	0.00323423	1.15786	0.577774	13	GGCCCCTGGGATC	GGGGTCAGTGGGTTCA	+
PfPVvsNEG10.fwd	SUH_MOUSE.H11MO.0.A	-3	0.00428679	1.53467	0.612644	10	GGCCCCTGGGATC	GCGTGGGAAAA	+
PfPVvsNEG10.fwd	MECP2_MOUSE.H11MO.0.C	-3	0.00990354	3.54547	0.978605	7	GGCCCCTGGGATC	CTCCGGG	-
PfPVvsNEG10.fwd	RARG_MOUSE.H11MO.0.C	4	0.0127916	4.5794	0.978605	13	GGCCCCTGGGATC	CCCAGGTCACTCTGACCT	-
PfPVvsNEG10.fwd	TEAD1_MOUSE.H11MO.0.A	-3	0.0133344	4.77373	0.978605	10	GGCCCCTGGGATC	CCCTGGAATGT	-
PfPVvsNEG10.fwd	SOX9_MOUSE.H11MO.0.A	3	0.013695	4.9028	0.978605	13	GGCCCCTGGGATC	AAAGGGGCCTTTGTTC	+
PfPVvsNEG10.fwd	NFIB_MOUSE.H11MO.0.C	-4	0.0167769	6.00612	0.998007	9	GGCCCCTGGGATC	CCTGGCAGC	+
PfPVvsNEG10.fwd	MITF_MOUSE.H11MO.0.A	-3	0.0210139	7.52298	0.998007	10	GGCCCCTGGGATC	CCACGTGACT	+
PfPVvsNEG10.fwd	TCF7_MOUSE.H11MO.0.A	0	0.0213046	7.62705	0.998007	13	GGCCCCTGGGATC	GTTTCCTTTGATCTTT	-
PfPVvsNEG10.fwd	TEAD4_MOUSE.H11MO.0.A	1	0.0225154	8.06051	0.998007	13	GGCCCCTGGGATC	ACATTCCTGGCATTC	+
PfPVvsNEG10.fwd	SOX4_MOUSE.H11MO.0.A	-3	0.0253309	9.06847	0.998007	10	GGCCCCTGGGATC	TCCTTTGTTCTC	+
PfPVvsNEG10.fwd	AP2B_MOUSE.H11MO.0.B	-1	0.0264293	9.4617	0.998007	10	GGCCCCTGGGATC	GCCCCCGGGC	-
PfPVvsNEG10.fwd	TF7L1_MOUSE.H11MO.0.A	-3	0.0265975	9.52189	0.998007	10	GGCCCCTGGGATC	GCCTTTGATGT	+
PfPVvsNEG11.fwd	THA_MOUSE.H11MO.0.C	5	0.000524222	0.187671	0.375343	12	AATCTGGGGACAA	GAGGTCATCTGAGGACA	+
PfPVvsNEG11.fwd	KAISO_MOUSE.H11MO.0.B	2	0.00489281	1.75162	1	13	AATCTGGGGACAA	CAAATCTCGCGAGAA	+
PfPVvsNEG11.fwd	COE1_MOUSE.H11MO.0.A	2	0.00830335	2.9726	1	11	AATCTGGGGACAA	AGTCCCTGGGGAC	+
PfPVvsNEG11.fwd	AP2C_MOUSE.H11MO.0.A	1	0.0093293	3.33989	1	12	AATCTGGGGACAA	TGGCCTGAGGCCA	-
PfPVvsNEG11.fwd	SUH_MOUSE.H11MO.0.A	-1	0.00985562	3.52831	1	11	AATCTGGGGACAA	GCGTGGGAAAA	+
PfPVvsNEG11.fwd	ZFP57_MOUSE.H11MO.0.B	-3	0.0138505	4.95849	1	10	AATCTGGGGACAA	CTGCGGCAAA	+
PfPVvsNEG11.fwd	RFX6_MOUSE.H11MO.0.C	-2	0.0168014	6.01489	1	11	AATCTGGGGACAA	CCTGGCAACAG	-
PfPVvsNEG11.fwd	SOX4_MOUSE.H11MO.0.A	-5	0.0187181	6.70107	1	8	AATCTGGGGACAA	GAGAACAAAGGA	-
PfPVvsNEG11.fwd	STAT6_MOUSE.H11MO.0.A	2	0.0258048	9.23812	1	12	AATCTGGGGACAA	CAGTTCTCAGGAAA	-
PfPVvsNEG12.fwd	FOXI1_MOUSE.H11MO.0.B	0	0.000610115	0.218421	0.271927	12	TTTTGATTGCTGC	CTCTGATTGGTC	+
PfPVvsNEG12.fwd	EVX2_MOUSE.H11MO.0.A	-1	0.00102531	0.367061	0.271927	12	TTTTGATTGCTGC	TTTTATTGCTTT	+
PfPVvsNEG12.fwd	NKX21_MOUSE.H11MO.0.A	0	0.00149918	0.536707	0.271927	10	TTTTGATTGCTGC	TCTTGAGTGG	+
PfPVvsNEG12.fwd	HXA1_MOUSE.H11MO.0.C	-2	0.00186724	0.668473	0.271927	10	TTTTGATTGCTGC	TTGATGGATG	+
PfPVvsNEG12.fwd	LHX6_MOUSE.H11MO.0.C	-1	0.00192697	0.689854	0.271927	9	TTTTGATTGCTGC	GCTGATTAC	+
PfPVvsNEG12.fwd	FOXP2_MOUSE.H11MO.0.A	-2	0.00297082	1.06355	0.330979	9	TTTTGATTGCTGC	TTGTTTACT	+
PfPVvsNEG12.fwd	HXB7_MOUSE.H11MO.0.C	-2	0.00330808	1.18429	0.330979	10	TTTTGATTGCTGC	TTGATTAATG	+
PfPVvsNEG12.fwd	NOBOX_MOUSE.H11MO.0.C	-2	0.00420546	1.50556	0.330979	9	TTTTGATTGCTGC	CTAATTGGT	+
PfPVvsNEG12.fwd	FOXO3_MOUSE.H11MO.0.B	-1	0.00436341	1.5621	0.330979	10	TTTTGATTGCTGC	CCTGTTTACA	+
PfPVvsNEG12.fwd	PRRX2_MOUSE.H11MO.0.C	-2	0.0052112	1.86561	0.330979	7	TTTTGATTGCTGC	TTAATTG	+
PfPVvsNEG12.fwd	TGIF1_MOUSE.H11MO.0.A	-3	0.00553558	1.98174	0.330979	9	TTTTGATTGCTGC	TGACAGCTG	+
PfPVvsNEG12.fwd	FOXA2_MOUSE.H11MO.0.A	0	0.00562902	2.01519	0.330979	13	TTTTGATTGCTGC	CCTTGTTTACTTT	+
PfPVvsNEG12.fwd	NFYA_MOUSE.H11MO.0.A	0	0.00694735	2.48715	0.341239	13	TTTTGATTGCTGC	TTCTGATTGGCTGA	-
PfPVvsNEG12.fwd	CDX2_MOUSE.H11MO.0.A	-1	0.00714781	2.55892	0.341239	12	TTTTGATTGCTGC	TTTTATGGCCTT	+
PfPVvsNEG12.fwd	HXB4_MOUSE.H11MO.0.A	-2	0.00725439	2.59707	0.341239	8	TTTTGATTGCTGC	TTAATGGC	+
PfPVvsNEG12.fwd	HXB8_MOUSE.H11MO.0.C	-2	0.010082	3.60936	0.433533	11	TTTTGATTGCTGC	TTGATTAATGC	+
PfPVvsNEG12.fwd	FOXM1_MOUSE.H11MO.0.B	-3	0.0115872	4.14821	0.433533	10	TTTTGATTGCTGC	TGTTTGCTTTGC	+
PfPVvsNEG12.fwd	NFYC_MOUSE.H11MO.0.B	0	0.0119266	4.26973	0.433533	13	TTTTGATTGCTGC	TTCTGATTGGCTGA	-
PfPVvsNEG12.fwd	BARX1_MOUSE.H11MO.0.C	-1	0.0122886	4.39933	0.433533	12	TTTTGATTGCTGC	TTTAATTGTTTT	+
PfPVvsNEG12.fwd	SMAD3_MOUSE.H11MO.0.B	0	0.0122886	4.39933	0.433533	12	TTTTGATTGCTGC	CTCTGTCACCTG	+
PfPVvsNEG12.fwd	HNF6_MOUSE.H11MO.0.A	2	0.0144015	5.15572	0.483878	9	TTTTGATTGCTGC	TTTATTGATTT	+
PfPVvsNEG12.fwd	FOXA3_MOUSE.H11MO.0.A	-1	0.0174411	6.2439	0.537676	12	TTTTGATTGCTGC	CTTGTTTACTTTG	+
PfPVvsNEG12.fwd	NKX25_MOUSE.H11MO.0.A	0	0.0175267	6.27455	0.537676	10	TTTTGATTGCTGC	TCTGGAGTGG	+
PfPVvsNEG12.fwd	PBX3_MOUSE.H11MO.0.A	0	0.0222533	7.96667	0.654231	13	TTTTGATTGCTGC	CTCTGATTGGCTGG	+
PfPVvsNEG12.fwd	TBP_MOUSE.H11MO.0.A	1	0.0247617	8.86469	0.684604	9	TTTTGATTGCTGC	CCTTTTATAG	-
PfPVvsNEG12.fwd	TCF7_MOUSE.H11MO.0.A	1	0.0253634	9.0801	0.684604	13	TTTTGATTGCTGC	GTTTCCTTTGATCTTT	-
PfPVvsNEG12.fwd	STAT6_MOUSE.H11MO.0.A	2	0.0261972	9.37859	0.684604	12	TTTTGATTGCTGC	TTTCCTGAGAACTG	+
PfPVvsNEG13.fwd	NKX28_MOUSE.H11MO.0.C	-1	7.24585e-06	0.00259401	0.00516312	9	CTTCAAGGACACT	TTCAAGGAC	+
PfPVvsNEG13.fwd	ERR3_MOUSE.H11MO.0.C	-2	4.20384e-05	0.0150497	0.0149775	10	CTTCAAGGACACT	TCAAGGTCAC	+
PfPVvsNEG13.fwd	ERR2_MOUSE.H11MO.0.A	2	0.00259884	0.930386	0.38685	13	CTTCAAGGACACT	AAGTTCAAGGTCATCCT	+
PfPVvsNEG13.fwd	HSF2_MOUSE.H11MO.0.A	-1	0.00275098	0.984851	0.38685	12	CTTCAAGGACACT	TTCTAGAACATTCT	-
PfPVvsNEG13.fwd	ERR1_MOUSE.H11MO.0.A	1	0.00317521	1.13673	0.38685	11	CTTCAAGGACACT	AGGTCAAGGTCA	+
PfPVvsNEG13.fwd	STF1_MOUSE.H11MO.0.B	0	0.0032574	1.16615	0.38685	11	CTTCAAGGACACT	GCTCAAGGCCA	+
PfPVvsNEG13.fwd	NR5A2_MOUSE.H11MO.0.A	0	0.00397303	1.42234	0.404433	11	CTTCAAGGACACT	GTTCAAGGTCA	+
PfPVvsNEG13.fwd	NR1H4_MOUSE.H11MO.0.A	0	0.00707466	2.53273	0.630143	13	CTTCAAGGACACT	CCTCGGGGTCATTGACCCC	-
PfPVvsNEG13.fwd	STAT4_MOUSE.H11MO.0.A	-1	0.00862306	3.08706	0.653864	10	CTTCAAGGACACT	TTCCGGGAAA	-
PfPVvsNEG13.fwd	STA5A_MOUSE.H11MO.0.A	-1	0.00917623	3.28509	0.653864	10	CTTCAAGGACACT	TTCCAAGAAA	+
PfPVvsNEG13.fwd	RARA_MOUSE.H11MO.0.A	9	0.0111779	4.00167	0.724084	11	CTTCAAGGACACT	GGGTCAGAAGTTCAAGGTCA	+
PfPVvsNEG13.fwd	RARG_MOUSE.H11MO.0.C	-2	0.0176749	6.32762	0.995197	11	CTTCAAGGACACT	CCCAGGTCACTCTGACCT	-
PfPVvsNEG13.fwd	RXRG_MOUSE.H11MO.0.B	11	0.0221541	7.93116	0.995197	11	CTTCAAGGACACT	GAGGGTCAGGAGTTCAAGGTCA	+
PfPVvsNEG13.fwd	RXRA_MOUSE.H11MO.0.A	10	0.0227121	8.13094	0.995197	11	CTTCAAGGACACT	AGGGTCAGGAGTTCAAGGTCA	+
PfPVvsNEG13.fwd	THA_MOUSE.H11MO.0.C	6	0.0240088	8.59515	0.995197	11	CTTCAAGGACACT	GAGGTCATCTGAGGACA	+
PfPVvsNEG13.fwd	NR4A2_MOUSE.H11MO.0.C	-3	0.0240306	8.60295	0.995197	9	CTTCAAGGACACT	AAAGGTCAC	+
PfPVvsNEG13.fwd	PRD14_MOUSE.H11MO.0.A	-3	0.0257593	9.22183	0.995197	10	CTTCAAGGACACT	CAAGGTCTCTAACCCT	-
PfPVvsNEGrbf1.fwd	LHX6_MOUSE.H11MO.0.C	-2	3.58548e-06	0.0012836	0.00254407	9	TTCCTGATTACAG	GCTGATTAC	+
PfPVvsNEGrbf1.fwd	FOXO3_MOUSE.H11MO.0.B	-2	0.000258139	0.0924136	0.0915809	10	TTCCTGATTACAG	CCTGTTTACA	+
PfPVvsNEGrbf1.fwd	LHX3_MOUSE.H11MO.0.C	-2	0.000611919	0.219067	0.144729	9	TTCCTGATTACAG	GCTAATTAA	+
PfPVvsNEGrbf1.fwd	DLX3_MOUSE.H11MO.0.C	-2	0.00107454	0.384684	0.14864	10	TTCCTGATTACAG	GATAATTACA	+
PfPVvsNEGrbf1.fwd	FOXP2_MOUSE.H11MO.0.A	-3	0.00121169	0.433783	0.14864	9	TTCCTGATTACAG	TTGTTTACT	+
PfPVvsNEGrbf1.fwd	FOXO1_MOUSE.H11MO.0.A	-1	0.00125691	0.449974	0.14864	10	TTCCTGATTACAG	GCCTGTTTAC	+
PfPVvsNEGrbf1.fwd	STAT6_MOUSE.H11MO.0.A	1	0.00312787	1.11978	0.308269	13	TTCCTGATTACAG	TTTCCTGAGAACTG	+
PfPVvsNEGrbf1.fwd	HXB7_MOUSE.H11MO.0.C	-3	0.00381658	1.36634	0.308269	10	TTCCTGATTACAG	TTGATTAATG	+
PfPVvsNEGrbf1.fwd	FOXA2_MOUSE.H11MO.0.A	-1	0.00391013	1.39983	0.308269	12	TTCCTGATTACAG	CCTTGTTTACTTT	+
PfPVvsNEGrbf1.fwd	HXB8_MOUSE.H11MO.0.C	-3	0.00472236	1.69061	0.331467	10	TTCCTGATTACAG	TTGATTAATGC	+
PfPVvsNEGrbf1.fwd	ISL1_MOUSE.H11MO.0.A	-2	0.00555915	1.99018	0.331467	9	TTCCTGATTACAG	GCTAATGGA	+
PfPVvsNEGrbf1.fwd	FOXK1_MOUSE.H11MO.0.A	-2	0.00575479	2.06021	0.331467	11	TTCCTGATTACAG	CTTGTTTACAT	+
PfPVvsNEGrbf1.fwd	PRRX2_MOUSE.H11MO.0.C	-3	0.00607298	2.17413	0.331467	7	TTCCTGATTACAG	TTAATTG	+
PfPVvsNEGrbf1.fwd	HXB4_MOUSE.H11MO.0.A	-3	0.00774241	2.77178	0.3924	8	TTCCTGATTACAG	TTAATGGC	+
PfPVvsNEGrbf1.fwd	NKX21_MOUSE.H11MO.0.A	-1	0.014354	5.13872	0.678989	10	TTCCTGATTACAG	TCTTGAGTGG	+
PfPVvsNEGrbf1.fwd	DLX5_MOUSE.H11MO.0.C	-4	0.0156268	5.59439	0.687801	9	TTCCTGATTACAG	TAATTATAGGT	+
PfPVvsNEGrbf1.fwd	FOXA3_MOUSE.H11MO.0.A	-2	0.016479	5.89947	0.687801	11	TTCCTGATTACAG	CTTGTTTACTTTG	+
PfPVvsNEGrbf1.fwd	FOXO4_MOUSE.H11MO.0.C	0	0.0199217	7.13196	0.785299	9	TTCCTGATTACAG	TTGTTTATT	+
PfPVvsNEGrbf1.fwd	NOBOX_MOUSE.H11MO.0.C	-3	0.0225337	8.06706	0.841512	9	TTCCTGATTACAG	CTAATTGGT	+
PfPVvsNEGrbf1.fwd	PBX3_MOUSE.H11MO.0.A	-1	0.02595	9.29009	0.86035	12	TTCCTGATTACAG	CTCTGATTGGCTGG	+
PfPVvsNEGrbf1.fwd	EHF_MOUSE.H11MO.0.B	5	0.0266975	9.5577	0.86035	10	TTCCTGATTACAG	GCCACTTCCTGGTTC	-
PfPVvsNEGrbf1.fwd	NKX25_MOUSE.H11MO.0.A	-1	0.0277572	9.93707	0.86035	10	TTCCTGATTACAG	TCTGGAGTGG	+
PfPVvsNEGrbf2.fwd	TFE2_MOUSE.H11MO.0.A	-1	5.11501e-08	1.83117e-05	3.58313e-05	11	GCTGCAGCTGTGT	CTGCAGCTGTG	-
PfPVvsNEGrbf2.fwd	MYF6_MOUSE.H11MO.0.C	-3	7.55841e-05	0.0270591	0.0264738	7	GCTGCAGCTGTGT	GCAGCTG	-
PfPVvsNEGrbf2.fwd	BHA15_MOUSE.H11MO.0.A	0	0.000132068	0.0472804	0.0308385	11	GCTGCAGCTGTGT	GCAGCAGCTGG	+
PfPVvsNEGrbf2.fwd	ASCL2_MOUSE.H11MO.0.C	-2	0.000296212	0.106044	0.0518751	9	GCTGCAGCTGTGT	AGCAGCTGG	-
PfPVvsNEGrbf2.fwd	HTF4_MOUSE.H11MO.0.A	-2	0.000597527	0.213915	0.0837151	10	GCTGCAGCTGTGT	AGCAGGTGGG	+
PfPVvsNEGrbf2.fwd	TGIF1_MOUSE.H11MO.0.A	-4	0.000827584	0.296275	0.0863281	9	GCTGCAGCTGTGT	CAGCTGTCA	-
PfPVvsNEGrbf2.fwd	SNAI2_MOUSE.H11MO.0.A	-1	0.000862649	0.308828	0.0863281	11	GCTGCAGCTGTGT	ATGCACCTGCC	-
PfPVvsNEGrbf2.fwd	ITF2_MOUSE.H11MO.0.B	-2	0.00112812	0.403868	0.0987831	9	GCTGCAGCTGTGT	TGCACCTGG	-
PfPVvsNEGrbf2.fwd	MYOG_MOUSE.H11MO.0.A	-1	0.00157041	0.562208	0.103736	12	GCTGCAGCTGTGT	CCGCAGCTGTCCC	+
PfPVvsNEGrbf2.fwd	HEN1_MOUSE.H11MO.0.C	3	0.00162895	0.583163	0.103736	13	GCTGCAGCTGTGT	TGGGGAGCAGCTGCGTCCCT	+
PfPVvsNEGrbf2.fwd	LYL1_MOUSE.H11MO.0.A	-3	0.00263025	0.941631	0.153544	10	GCTGCAGCTGTGT	CCAGCTGTTTCCTG	+
PfPVvsNEGrbf2.fwd	ASCL1_MOUSE.H11MO.0.A	-1	0.00381339	1.36519	0.190809	12	GCTGCAGCTGTGT	CTGCAGCTGCCCCC	+
PfPVvsNEGrbf2.fwd	PRDM9_MOUSE.H11MO.0.C	2	0.00460932	1.65014	0.215259	13	GCTGCAGCTGTGT	CAGATGCTGCTGCCATCTT	-
PfPVvsNEGrbf2.fwd	ATOH1_MOUSE.H11MO.0.B	-2	0.00718628	2.57269	0.31463	9	GCTGCAGCTGTGT	AGCAGATGG	+
PfPVvsNEGrbf2.fwd	MYOD1_MOUSE.H11MO.0.A	-3	0.00869108	3.11141	0.325615	10	GCTGCAGCTGTGT	GCAGCTGTTCCTGTC	+
PfPVvsNEGrbf2.fwd	PTF1A_MOUSE.H11MO.0.A	7	0.00883164	3.16173	0.325615	11	GCTGCAGCTGTGT	GGGAAAGGGGGCAGCTGG	-
PfPVvsNEGrbf2.fwd	OLIG2_MOUSE.H11MO.0.A	7	0.0104934	3.75665	0.36754	11	GCTGCAGCTGTGT	CAGAAGGGAAACAGCTGG	-
PfPVvsNEGrbf2.fwd	TBX21_MOUSE.H11MO.0.A	-3	0.0144581	5.17601	0.460369	10	GCTGCAGCTGTGT	GGAGGTGTGAGA	+
PfPVvsNEGrbf2.fwd	SNAI1_MOUSE.H11MO.0.C	-3	0.0181632	6.50244	0.495535	8	GCTGCAGCTGTGT	CCAGGTGG	+
PfPVvsNEGrbf2.fwd	OVOL1_MOUSE.H11MO.0.C	-2	0.0185552	6.64277	0.495535	9	GCTGCAGCTGTGT	TGTAACTGT	+
PfPVvsNEGrbf2.fwd	NGN2_MOUSE.H11MO.0.C	0	0.0190995	6.83762	0.495535	12	GCTGCAGCTGTGT	GGAGCAGATGGC	+
PfPVvsNEGrbf2.fwd	TWST1_MOUSE.H11MO.0.B	6	0.0233713	8.36691	0.529701	11	GCTGCAGCTGTGT	TAATTAAAACCAGATGT	-
PfPVvsNEGrbf3.fwd	ERR3_MOUSE.H11MO.0.C	-2	2.13779e-06	0.000765328	0.00149323	10	CTGTGACCTTGAT	GTGACCTTGA	-
PfPVvsNEGrbf3.fwd	RORA_MOUSE.H11MO.0.C	0	1.08182e-05	0.00387292	0.00377822	13	CTGTGACCTTGAT	CCCTGACCTAGTT	-
PfPVvsNEGrbf3.fwd	NR1D2_MOUSE.H11MO.0.A	2	0.000321734	0.115181	0.0573072	13	CTGTGACCTTGAT	CCCTCTGACCCACTTCCCC	-
PfPVvsNEGrbf3.fwd	NR5A2_MOUSE.H11MO.0.A	-3	0.000481821	0.172492	0.0573072	10	CTGTGACCTTGAT	TGACCTTGAAC	-
PfPVvsNEGrbf3.fwd	NR4A2_MOUSE.H11MO.0.C	-2	0.000487585	0.174556	0.0573072	9	CTGTGACCTTGAT	GTGACCTTT	-
PfPVvsNEGrbf3.fwd	ERR1_MOUSE.H11MO.0.A	-3	0.000608088	0.217695	0.0573072	10	CTGTGACCTTGAT	TGACCTTGACCT	-
PfPVvsNEGrbf3.fwd	RXRB_MOUSE.H11MO.0.C	-1	0.000615241	0.220256	0.0573072	10	CTGTGACCTTGAT	TGTGACCTCA	-
PfPVvsNEGrbf3.fwd	STF1_MOUSE.H11MO.0.B	-3	0.000656353	0.234975	0.0573072	10	CTGTGACCTTGAT	TGGCCTTGAGC	-
PfPVvsNEGrbf3.fwd	PPARA_MOUSE.H11MO.0.A	4	0.000837529	0.299835	0.0650008	13	CTGTGACCTTGAT	TGACCTTTGACCTAGTT	-
PfPVvsNEGrbf3.fwd	RARA_MOUSE.H11MO.0.A	-3	0.00100211	0.358755	0.0699965	10	CTGTGACCTTGAT	TGACCTTGAACTTCTGACCC	-
PfPVvsNEGrbf3.fwd	NR1D1_MOUSE.H11MO.0.A	2	0.00155254	0.555808	0.098585	13	CTGTGACCTTGAT	CCTTCTGACCCACTTCCCT	-
PfPVvsNEGrbf3.fwd	COT1_MOUSE.H11MO.0.B	-3	0.00173745	0.622007	0.0998242	9	CTGTGACCTTGAT	TGACCTTTG	-
PfPVvsNEGrbf3.fwd	RXRG_MOUSE.H11MO.0.B	-3	0.0019685	0.704724	0.0998242	10	CTGTGACCTTGAT	TGACCTTGAACTCCTGACCCTC	-
PfPVvsNEGrbf3.fwd	ERR2_MOUSE.H11MO.0.A	1	0.00216343	0.774507	0.0998242	13	CTGTGACCTTGAT	AGGATGACCTTGAACTT	-
PfPVvsNEGrbf3.fwd	RORG_MOUSE.H11MO.0.B	-3	0.00246257	0.881601	0.0998242	10	CTGTGACCTTGAT	TGACCCACTTTC	-
PfPVvsNEGrbf3.fwd	PPARG_MOUSE.H11MO.0.A	4	0.00246477	0.882386	0.0998242	13	CTGTGACCTTGAT	TGACCTTTGCCCCACTT	-
PfPVvsNEGrbf3.fwd	RXRA_MOUSE.H11MO.0.A	-3	0.00250776	0.897779	0.0998242	10	CTGTGACCTTGAT	TGACCTTGAACTCCTGACCCT	-
PfPVvsNEGrbf3.fwd	RARG_MOUSE.H11MO.0.C	9	0.00265825	0.951655	0.0998242	9	CTGTGACCTTGAT	CCCAGGTCACTCTGACCT	-
PfPVvsNEGrbf3.fwd	ESR2_MOUSE.H11MO.0.A	6	0.00271536	0.972099	0.0998242	9	CTGTGACCTTGAT	AGGTCACCCTGACCT	+
PfPVvsNEGrbf3.fwd	VDR_MOUSE.H11MO.0.A	6	0.00289162	1.0352	0.100989	10	CTGTGACCTTGAT	TGAACCCACTGACCCC	-
PfPVvsNEGrbf3.fwd	COT2_MOUSE.H11MO.0.A	0	0.00343938	1.2313	0.114399	13	CTGTGACCTTGAT	CTCTGACCTTTGG	-
PfPVvsNEGrbf3.fwd	NR2C2_MOUSE.H11MO.0.A	4	0.0056397	2.01901	0.179059	9	CTGTGACCTTGAT	TGACCTTTGACCT	-
PfPVvsNEGrbf3.fwd	ESR1_MOUSE.H11MO.0.A	6	0.00642873	2.30148	0.195236	9	CTGTGACCTTGAT	AGGTCACCCTGACCT	+
PfPVvsNEGrbf3.fwd	PRD14_MOUSE.H11MO.0.A	6	0.00970835	3.47559	0.271248	10	CTGTGACCTTGAT	CAAGGTCTCTAACCCT	-
PfPVvsNEGrbf3.fwd	NKX28_MOUSE.H11MO.0.C	-4	0.0125654	4.49841	0.325067	9	CTGTGACCTTGAT	GTCCTTGAA	-
PfPVvsNEGrbf3.fwd	NR1H3_MOUSE.H11MO.0.A	5	0.0179817	6.43743	0.448573	10	CTGTGACCTTGAT	CTGACCTTTGACCTC	-
PfPVvsNEGrbf3.fwd	GFI1_MOUSE.H11MO.0.C	1	0.0191112	6.84179	0.457414	9	CTGTGACCTTGAT	GCTGTGATTT	+
PfPVvsNEGrbf3.fwd	NR4A1_MOUSE.H11MO.0.B	-3	0.0196457	7.03318	0.457414	9	CTGTGACCTTGAT	TGACCTTTT	-
PfPVvsNEGrbf3.fwd	SMAD3_MOUSE.H11MO.0.B	2	0.0242526	8.68244	0.526111	10	CTGTGACCTTGAT	CTCTGTCACCTG	+
PfPVvsNEGrbf3.fwd	ANDR_MOUSE.H11MO.0.A	6	0.0249028	8.91519	0.526111	10	CTGTGACCTTGAT	GGAACACTCTGTTCCT	+
PfPVvsNEGrbf3.fwd	NR1H4_MOUSE.H11MO.0.A	5	0.0249641	8.93715	0.526111	13	CTGTGACCTTGAT	GGGGTCAATGACCCCGAGG	+
PfPVvsNEGrbf3.fwd	GFI1B_MOUSE.H11MO.0.A	1	0.0256091	9.16807	0.526111	9	CTGTGACCTTGAT	GCTGTGATTT	+
PfPVvsNEGrbf4.fwd	MAFK_MOUSE.H11MO.0.A	1	0.00118659	0.424798	0.444497	13	AAGCTGCAGGGTC	AAAACTGCTGAGTCAGCATT	+
PfPVvsNEGrbf4.fwd	MAFG_MOUSE.H11MO.0.A	1	0.00151833	0.543563	0.444497	13	AAGCTGCAGGGTC	AAAATTGCTGACTCAGCA	+
PfPVvsNEGrbf4.fwd	MAFF_MOUSE.H11MO.0.A	1	0.00267316	0.956991	0.444497	13	AAGCTGCAGGGTC	AAAAATGCTGACTCAGCAAAAA	+
PfPVvsNEGrbf4.fwd	MAF_MOUSE.H11MO.0.A	0	0.00274807	0.983809	0.444497	13	AAGCTGCAGGGTC	AATTTGCTGACTCAGCA	+
PfPVvsNEGrbf4.fwd	NFE2_MOUSE.H11MO.0.A	-1	0.00311461	1.11503	0.444497	12	AAGCTGCAGGGTC	AACTGCTGAGTCAT	-
PfPVvsNEGrbf4.fwd	TFE2_MOUSE.H11MO.0.A	2	0.00411355	1.47265	0.489216	9	AAGCTGCAGGGTC	CACAGCTGCAG	+
PfPVvsNEGrbf4.fwd	NF2L2_MOUSE.H11MO.0.A	-1	0.00789026	2.82471	0.699277	12	AAGCTGCAGGGTC	AATTGCTGAGTCAT	-
PfPVvsNEGrbf4.fwd	RUNX2_MOUSE.H11MO.0.A	1	0.00884773	3.16749	0.699277	11	AAGCTGCAGGGTC	CAAACCACAGAC	-
PfPVvsNEGrbf4.fwd	ASCL1_MOUSE.H11MO.0.A	5	0.00999195	3.57712	0.699277	9	AAGCTGCAGGGTC	GGGGGCAGCTGCAG	-
PfPVvsNEGrbf4.fwd	NFIB_MOUSE.H11MO.0.C	-2	0.0106303	3.80565	0.699277	9	AAGCTGCAGGGTC	GCTGCCAGG	-
PfPVvsNEGrbf4.fwd	BACH2_MOUSE.H11MO.0.A	-4	0.0107797	3.85913	0.699277	9	AAGCTGCAGGGTC	TGCTGAGTCAT	+
PfPVvsNEGrbf4.fwd	MAFB_MOUSE.H11MO.0.B	-4	0.0137521	4.92324	0.817753	9	AAGCTGCAGGGTC	TGCTGACTCAG	+
PfPVvsNEGrbf4.fwd	RUNX1_MOUSE.H11MO.0.A	1	0.0179195	6.41518	0.876437	11	AAGCTGCAGGGTC	CAAACCACAGAC	-
PfPVvsNEGrbf4.fwd	RARA_MOUSE.H11MO.0.A	6	0.0189929	6.79947	0.876437	13	AAGCTGCAGGGTC	GGGTCAGAAGTTCAAGGTCA	+
PfPVvsNEGrbf4.fwd	HTF4_MOUSE.H11MO.0.A	-1	0.0215122	7.70138	0.876437	10	AAGCTGCAGGGTC	AGCAGGTGGG	+
PfPVvsNEGrbf4.fwd	TBX20_MOUSE.H11MO.0.C	-1	0.0244982	8.77037	0.876437	12	AAGCTGCAGGGTC	AGGTGCTGACAGGT	+
PfPVvsNEGrbf4.fwd	SP4_MOUSE.H11MO.0.B	4	0.027885	9.98281	0.876437	13	AAGCTGCAGGGTC	GGGAAGGGGGCGGGGCCGGG	+
PfPVvsNEGrbf5.fwd	SUH_MOUSE.H11MO.0.A	-2	5.56198e-05	0.0199119	0.0298181	11	GGCCCTGGGAACA	GCGTGGGAAAA	+
PfPVvsNEGrbf5.fwd	PRD16_MOUSE.H11MO.0.B	0	8.40483e-05	0.0300893	0.0298181	10	GGCCCTGGGAACA	TCCCCTGGGG	-
PfPVvsNEGrbf5.fwd	COE1_MOUSE.H11MO.0.A	1	0.000278496	0.0997016	0.0584857	12	GGCCCTGGGAACA	GTCCCCAGGGACT	-
PfPVvsNEGrbf5.fwd	RFX6_MOUSE.H11MO.0.C	-3	0.00213127	0.762995	0.25204	10	GGCCCTGGGAACA	CCTGGCAACAG	-
PfPVvsNEGrbf5.fwd	RFX3_MOUSE.H11MO.0.C	4	0.00324595	1.16205	0.311267	12	GGCCCTGGGAACA	CGGTTGCCATGGCAAC	+
PfPVvsNEGrbf5.fwd	AP2C_MOUSE.H11MO.0.A	0	0.00398647	1.42716	0.311267	13	GGCCCTGGGAACA	TGGCCTGAGGCCA	-
PfPVvsNEGrbf5.fwd	AP2A_MOUSE.H11MO.0.A	1	0.00402588	1.44126	0.311267	11	GGCCCTGGGAACA	ATGGCCTGAGGC	+
PfPVvsNEGrbf5.fwd	MECP2_MOUSE.H11MO.0.C	-2	0.00438683	1.57049	0.311267	7	GGCCCTGGGAACA	CTCCGGG	-
PfPVvsNEGrbf5.fwd	AP2B_MOUSE.H11MO.0.B	-1	0.00710102	2.54216	0.458046	10	GGCCCTGGGAACA	GCCCCCGGGC	-
PfPVvsNEGrbf5.fwd	RFX2_MOUSE.H11MO.0.A	6	0.00901047	3.22575	0.491797	13	GGCCCTGGGAACA	TCCCGTTGCCATGGCAACCGCC	-
PfPVvsNEGrbf5.fwd	MTF1_MOUSE.H11MO.0.C	2	0.0113187	4.05209	0.566856	13	GGCCCTGGGAACA	AGTGCCGTGTGCAAAAC	+
PfPVvsNEGrbf5.fwd	NFAC3_MOUSE.H11MO.0.B	-5	0.0119835	4.29008	0.566856	8	GGCCCTGGGAACA	TGGAAAACT	+
PfPVvsNEGrbf5.fwd	THA_MOUSE.H11MO.0.C	4	0.0173455	6.2097	0.647762	13	GGCCCTGGGAACA	GAGGTCATCTGAGGACA	+
PfPVvsNEGrbf5.fwd	RFX1_MOUSE.H11MO.0.A	8	0.0215282	7.7071	0.763765	13	GGCCCTGGGAACA	GCCCCGGTTGCCATGGCGACGG	+
PfPVvsNEGrbf5.fwd	STF1_MOUSE.H11MO.0.B	1	0.0275078	9.8478	0.917391	10	GGCCCTGGGAACA	TGGCCTTGAGC	-
PfPVvsNEGrbf6.fwd	MAFB_MOUSE.H11MO.0.B	-1	1.68785e-08	6.04251e-06	1.16104e-05	11	CCTGAGTCAGCAA	CTGAGTCAGCA	-
PfPVvsNEGrbf6.fwd	MAFG_MOUSE.H11MO.0.A	1	6.56163e-08	2.34906e-05	2.2568e-05	13	CCTGAGTCAGCAA	TGCTGAGTCAGCAATTTT	-
PfPVvsNEGrbf6.fwd	MAF_MOUSE.H11MO.0.A	1	1.94437e-07	6.96083e-05	4.45829e-05	13	CCTGAGTCAGCAA	TGCTGAGTCAGCAAATT	-
PfPVvsNEGrbf6.fwd	MAFF_MOUSE.H11MO.0.A	6	7.16453e-07	0.00025649	0.000123208	13	CCTGAGTCAGCAA	AAAAATGCTGACTCAGCAAAAA	+
PfPVvsNEGrbf6.fwd	MAFK_MOUSE.H11MO.0.A	3	5.49615e-06	0.00196762	0.000756137	13	CCTGAGTCAGCAA	AATGCTGACTCAGCAGTTTT	-
PfPVvsNEGrbf6.fwd	NF2L2_MOUSE.H11MO.0.A	-1	2.15141e-05	0.00770204	0.00164434	12	CCTGAGTCAGCAA	ATGACTCAGCAATT	+
PfPVvsNEGrbf6.fwd	BACH2_MOUSE.H11MO.0.A	-1	3.39638e-05	0.0121591	0.0023363	11	CCTGAGTCAGCAA	ATGACTCAGCA	-
PfPVvsNEGrbf6.fwd	NFE2_MOUSE.H11MO.0.A	-1	4.34886e-05	0.0155689	0.00271953	12	CCTGAGTCAGCAA	ATGACTCAGCAGTT	+
PfPVvsNEGrbf6.fwd	BACH1_MOUSE.H11MO.0.C	2	5.61096e-05	0.0200872	0.00317838	12	CCTGAGTCAGCAA	ACCATGACTCAGCA	-
PfPVvsNEGrbf6.fwd	ATF3_MOUSE.H11MO.0.A	-1	0.000233279	0.0835138	0.011462	9	CCTGAGTCAGCAA	ATGAGTCAC	+
PfPVvsNEGrbf6.fwd	FOSL2_MOUSE.H11MO.0.A	0	0.000341845	0.122381	0.0156765	11	CCTGAGTCAGCAA	GATGAGTCACC	+
PfPVvsNEGrbf6.fwd	FOSB_MOUSE.H11MO.0.A	-1	0.000518234	0.185528	0.0222801	9	CCTGAGTCAGCAA	ATGAGTCAT	+
PfPVvsNEGrbf6.fwd	FOXA3_MOUSE.H11MO.0.A	-1	0.000700949	0.25094	0.0272436	12	CCTGAGTCAGCAA	CAAAGTAAACAAG	-
PfPVvsNEGrbf6.fwd	JUNB_MOUSE.H11MO.0.A	-1	0.000712895	0.255216	0.0272436	9	CCTGAGTCAGCAA	ATGAGTCAC	+
PfPVvsNEGrbf6.fwd	FOXC1_MOUSE.H11MO.0.C	0	0.00154582	0.553405	0.0506352	13	CCTGAGTCAGCAA	CTTAAGTAAACAATG	-
PfPVvsNEGrbf6.fwd	FOSL1_MOUSE.H11MO.0.A	1	0.00163766	0.586281	0.0512049	11	CCTGAGTCAGCAA	GGATGAGTCACC	+
PfPVvsNEGrbf6.fwd	FOXD3_MOUSE.H11MO.0.C	1	0.00201259	0.720509	0.0601922	13	CCTGAGTCAGCAA	TGCTAAGTAAACAAA	-
PfPVvsNEGrbf6.fwd	FOS_MOUSE.H11MO.0.A	1	0.00214132	0.766593	0.0613737	11	CCTGAGTCAGCAA	GGATGAGTCATC	+
PfPVvsNEGrbf6.fwd	FOXA1_MOUSE.H11MO.0.A	-2	0.0024601	0.880714	0.0676899	10	CCTGAGTCAGCAA	TATGTAAACA	-
PfPVvsNEGrbf6.fwd	FOXA2_MOUSE.H11MO.0.A	-2	0.00268608	0.961618	0.0710654	11	CCTGAGTCAGCAA	AAAGTAAACAAGG	-
PfPVvsNEGrbf6.fwd	FOXM1_MOUSE.H11MO.0.B	0	0.00630721	2.25798	0.153142	12	CCTGAGTCAGCAA	GCAAAGCAAACA	-
PfPVvsNEGrbf6.fwd	JUN_MOUSE.H11MO.0.A	-1	0.00704074	2.52059	0.161439	10	CCTGAGTCAGCAA	GTGACTCACC	-
PfPVvsNEGrbf6.fwd	ZN431_MOUSE.H11MO.0.C	9	0.00751268	2.68954	0.166602	13	CCTGAGTCAGCAA	AGATACCAACCTAAGACAGGCAC	+
PfPVvsNEGrbf6.fwd	PO3F1_MOUSE.H11MO.0.C	2	0.00877096	3.14	0.177452	13	CCTGAGTCAGCAA	CTCATGAATATTCAAG	+
PfPVvsNEGrbf6.fwd	NR1I3_MOUSE.H11MO.0.C	-2	0.0114539	4.10049	0.218858	11	CCTGAGTCAGCAA	GGGGTCAGGAAAGTTCAG	+
PfPVvsNEGrbf6.fwd	FOXP2_MOUSE.H11MO.0.A	-4	0.012434	4.45137	0.225081	9	CCTGAGTCAGCAA	AGTAAACAA	-
PfPVvsNEGrbf6.fwd	PO3F2_MOUSE.H11MO.0.A	2	0.0146613	5.24876	0.258595	13	CCTGAGTCAGCAA	CTCATGCATATGCATA	+
PfPVvsNEGrbf6.fwd	JUND_MOUSE.H11MO.0.A	1	0.0155708	5.57434	0.26777	10	CCTGAGTCAGCAA	GGGTGAGTCAT	+
PfPVvsNEGrbf6.fwd	FOXO4_MOUSE.H11MO.0.C	-4	0.0225893	8.08697	0.369264	9	CCTGAGTCAGCAA	AATAAACAA	-
PfPVvsNEGrbf6.fwd	BATF3_MOUSE.H11MO.0.A	-3	0.0245904	8.80337	0.375894	10	CCTGAGTCAGCAA	GAGTCATAATGAAACTG	-
PfPVvsNEGrbf6.fwd	EVX2_MOUSE.H11MO.0.A	-2	0.0260548	9.32762	0.382418	11	CCTGAGTCAGCAA	AAAGCAATAAAA	-
PfPVvsNEGrbf7.fwd	BACH2_MOUSE.H11MO.0.A	-3	0.000128464	0.0459902	0.0890635	10	GGCTGCTGAGGCC	TGCTGAGTCAT	+
PfPVvsNEGrbf7.fwd	NFE2_MOUSE.H11MO.0.A	0	0.00035052	0.125486	0.0890635	13	GGCTGCTGAGGCC	AACTGCTGAGTCAT	-
PfPVvsNEGrbf7.fwd	HEN1_MOUSE.H11MO.0.C	5	0.000384343	0.137595	0.0890635	13	GGCTGCTGAGGCC	TGGGGAGCAGCTGCGTCCCT	+
PfPVvsNEGrbf7.fwd	BACH1_MOUSE.H11MO.0.C	-3	0.00069523	0.248892	0.120829	10	GGCTGCTGAGGCC	TGCTGAGTCATGGT	+
PfPVvsNEGrbf7.fwd	MAFK_MOUSE.H11MO.0.A	2	0.0011153	0.399278	0.152704	13	GGCTGCTGAGGCC	AAAACTGCTGAGTCAGCATT	+
PfPVvsNEGrbf7.fwd	HNF4G_MOUSE.H11MO.0.C	0	0.00153761	0.550463	0.152704	13	GGCTGCTGAGGCC	GAGTCCAAAGTCCA	+
PfPVvsNEGrbf7.fwd	NF2L2_MOUSE.H11MO.0.A	0	0.00153761	0.550463	0.152704	13	GGCTGCTGAGGCC	AATTGCTGAGTCAT	-
PfPVvsNEGrbf7.fwd	MAFB_MOUSE.H11MO.0.B	-3	0.00205683	0.736343	0.171379	10	GGCTGCTGAGGCC	TGCTGACTCAG	+
PfPVvsNEGrbf7.fwd	MAFG_MOUSE.H11MO.0.A	-3	0.0022187	0.794295	0.171379	10	GGCTGCTGAGGCC	TGCTGAGTCAGCAATTTT	-
PfPVvsNEGrbf7.fwd	MAF_MOUSE.H11MO.0.A	-3	0.00432084	1.54686	0.300379	10	GGCTGCTGAGGCC	TGCTGAGTCAGCAAATT	-
PfPVvsNEGrbf7.fwd	MAFF_MOUSE.H11MO.0.A	2	0.00500534	1.79191	0.316332	13	GGCTGCTGAGGCC	AAAAATGCTGACTCAGCAAAAA	+
PfPVvsNEGrbf7.fwd	TBX20_MOUSE.H11MO.0.C	0	0.00661017	2.36644	0.35922	13	GGCTGCTGAGGCC	AGGTGCTGACAGGT	+
PfPVvsNEGrbf7.fwd	MYF6_MOUSE.H11MO.0.C	-1	0.00719548	2.57598	0.35922	7	GGCTGCTGAGGCC	GCAGCTG	-
PfPVvsNEGrbf7.fwd	MYOG_MOUSE.H11MO.0.A	2	0.00750494	2.68677	0.35922	11	GGCTGCTGAGGCC	GGGACAGCTGCGG	-
PfPVvsNEGrbf7.fwd	PRDM9_MOUSE.H11MO.0.C	1	0.00860635	3.08107	0.35922	13	GGCTGCTGAGGCC	CAGATGCTGCTGCCATCTT	-
PfPVvsNEGrbf7.fwd	HNF4A_MOUSE.H11MO.0.A	0	0.00956059	3.42269	0.35922	13	GGCTGCTGAGGCC	AAGGCCAAAGTCCA	+
PfPVvsNEGrbf7.fwd	BHA15_MOUSE.H11MO.0.A	2	0.00981776	3.51476	0.35922	9	GGCTGCTGAGGCC	CCAGCTGCTGC	-
PfPVvsNEGrbf7.fwd	JUN_MOUSE.H11MO.0.A	-4	0.0112378	4.02314	0.387417	9	GGCTGCTGAGGCC	GGTGAGTCAC	+
PfPVvsNEGrbf7.fwd	SRBP1_MOUSE.H11MO.0.B	1	0.015176	5.43302	0.464319	10	GGCTGCTGAGGCC	GGTGGGGTGAG	+
PfPVvsNEGrbf7.fwd	ASCL1_MOUSE.H11MO.0.A	-2	0.0153618	5.49953	0.464319	11	GGCTGCTGAGGCC	CTGCAGCTGCCCCC	+
PfPVvsNEGrbf7.fwd	ZFX_MOUSE.H11MO.0.B	1	0.016637	5.95604	0.481909	13	GGCTGCTGAGGCC	GGGGGCCCCAGGCCTCGGC	-
PfPVvsNEGrbf7.fwd	ISL1_MOUSE.H11MO.0.A	-4	0.0222696	7.97252	0.605475	9	GGCTGCTGAGGCC	GCTAATGGA	+
PfPVvsNEGrbf7.fwd	HTF4_MOUSE.H11MO.0.A	0	0.0236375	8.46224	0.605475	10	GGCTGCTGAGGCC	AGCAGGTGGG	+
PfPVvsNEGrbf7.fwd	TGIF1_MOUSE.H11MO.0.A	1	0.0236953	8.4829	0.605475	8	GGCTGCTGAGGCC	TGACAGCTG	+
PfPVvsNEGrbf7.fwd	SRBP2_MOUSE.H11MO.0.B	2	0.0244682	8.75961	0.605475	11	GGCTGCTGAGGCC	GGGTGGGGTGAGG	+
PfPVvsNEGrbf7.fwd	FOSL2_MOUSE.H11MO.0.A	-4	0.0258506	9.25451	0.605475	9	GGCTGCTGAGGCC	GATGAGTCACC	+
PfPVvsNEGrbf7.fwd	THA_MOUSE.H11MO.0.C	3	0.0261286	9.35402	0.605475	13	GGCTGCTGAGGCC	GAGGTCATCTGAGGACA	+
PfPVvsNEGrbf8.fwd	ERG_MOUSE.H11MO.0.A	1	0.000113093	0.0404875	0.0469261	13	CTGCTTCCTGACT	CCCACTTCCGGTCC	-
PfPVvsNEGrbf8.fwd	ETV4_MOUSE.H11MO.0.B	-2	0.000167661	0.0600226	0.0469261	8	CTGCTTCCTGACT	ACTTCCTG	-
PfPVvsNEGrbf8.fwd	ETV2_MOUSE.H11MO.0.A	1	0.000256414	0.0917964	0.0469261	13	CTGCTTCCTGACT	CCCACTTCCTGTTTCC	-
PfPVvsNEGrbf8.fwd	LYL1_MOUSE.H11MO.0.A	4	0.000265645	0.0951008	0.0469261	10	CTGCTTCCTGACT	CCAGCTGTTTCCTG	+
PfPVvsNEGrbf8.fwd	ETS1_MOUSE.H11MO.0.A	0	0.000358536	0.128356	0.0506683	13	CTGCTTCCTGACT	CCACTTCCTGTCCC	-
PfPVvsNEGrbf8.fwd	ELK4_MOUSE.H11MO.0.B	0	0.000753171	0.269635	0.0886983	13	CTGCTTCCTGACT	CCGCTTCCGGCCC	-
PfPVvsNEGrbf8.fwd	FLI1_MOUSE.H11MO.0.A	0	0.000978123	0.350168	0.0987343	13	CTGCTTCCTGACT	CCACTTCCGGCCCC	-
PfPVvsNEGrbf8.fwd	ETV6_MOUSE.H11MO.0.C	-2	0.00125266	0.448451	0.110641	9	CTGCTTCCTGACT	ACTTCCTGT	-
PfPVvsNEGrbf8.fwd	PTF1A_MOUSE.H11MO.0.A	4	0.00159528	0.571109	0.125247	13	CTGCTTCCTGACT	CCAGCTGCCCCCTTTCCC	+
PfPVvsNEGrbf8.fwd	SMAD3_MOUSE.H11MO.0.B	2	0.00233864	0.837232	0.162958	10	CTGCTTCCTGACT	CTCTGTCACCTG	+
PfPVvsNEGrbf8.fwd	ETS2_MOUSE.H11MO.0.A	1	0.00253685	0.908191	0.162958	12	CTGCTTCCTGACT	TCCTCTTCCTTCC	-
PfPVvsNEGrbf8.fwd	OLIG2_MOUSE.H11MO.0.A	4	0.00396436	1.41924	0.233435	13	CTGCTTCCTGACT	CCAGCTGTTTCCCTTCTG	+
PfPVvsNEGrbf8.fwd	FOXP2_MOUSE.H11MO.0.A	0	0.00836142	2.99339	0.437417	9	CTGCTTCCTGACT	TTGTTTACT	+
PfPVvsNEGrbf8.fwd	E2F3_MOUSE.H11MO.0.A	-3	0.00866664	3.10266	0.437417	10	CTGCTTCCTGACT	CCTCCCGCCC	-
PfPVvsNEGrbf8.fwd	ELK1_MOUSE.H11MO.0.B	0	0.0094293	3.37569	0.437764	11	CTGCTTCCTGACT	CCACTTCCGGT	-
PfPVvsNEGrbf8.fwd	ELF3_MOUSE.H11MO.0.B	0	0.0100855	3.61062	0.437764	13	CTGCTTCCTGACT	CCACTTCCTGGTTC	-
PfPVvsNEGrbf8.fwd	INSM1_MOUSE.H11MO.0.C	-1	0.0111517	3.9923	0.437764	12	CTGCTTCCTGACT	TGCCCCCTGACA	-
PfPVvsNEGrbf8.fwd	E2F6_MOUSE.H11MO.0.A	-2	0.0111517	3.9923	0.437764	11	CTGCTTCCTGACT	CCTTCCCGCCCA	-
PfPVvsNEGrbf8.fwd	EHF_MOUSE.H11MO.0.B	1	0.0124043	4.44074	0.461309	13	CTGCTTCCTGACT	GCCACTTCCTGGTTC	-
PfPVvsNEGrbf8.fwd	ZN335_MOUSE.H11MO.0.A	11	0.0130711	4.67947	0.461802	11	CTGCTTCCTGACT	GGCTGTCCTCGGCGCTGCCTGA	+
PfPVvsNEGrbf8.fwd	MAF_MOUSE.H11MO.0.A	3	0.0170256	6.09516	0.566321	13	CTGCTTCCTGACT	AATTTGCTGACTCAGCA	+
PfPVvsNEGrbf8.fwd	NR2E3_MOUSE.H11MO.0.C	-1	0.0176324	6.31241	0.566321	12	CTGCTTCCTGACT	TGACTTTTGACTTT	-
PfPVvsNEGrbf8.fwd	GABPA_MOUSE.H11MO.0.A	0	0.0186155	6.66434	0.571899	13	CTGCTTCCTGACT	CCACTTCCGGTTCC	-
PfPVvsNEGrbf8.fwd	SPI1_MOUSE.H11MO.0.A	0	0.0203456	7.28372	0.58721	13	CTGCTTCCTGACT	CCACTTCCTCTTTTT	-
PfPVvsNEGrbf8.fwd	FOXM1_MOUSE.H11MO.0.B	-1	0.0207759	7.43778	0.58721	12	CTGCTTCCTGACT	TGTTTGCTTTGC	+
PfPVvsNEGrbf8.fwd	MAFF_MOUSE.H11MO.0.A	-1	0.0229424	8.21338	0.603638	12	CTGCTTCCTGACT	TTTTTGCTGAGTCAGCATTTTT	-
PfPVvsNEGrbf8.fwd	STAT6_MOUSE.H11MO.0.A	-3	0.0230658	8.25754	0.603638	10	CTGCTTCCTGACT	TTTCCTGAGAACTG	+
PfPVvsNEGrbf9.fwd	MEF2C_MOUSE.H11MO.0.A	2	6.62517e-08	2.37181e-05	4.70087e-05	13	CTATAAATAGACC	AGCTAAAAATAGAAC	-
PfPVvsNEGrbf9.fwd	MEF2D_MOUSE.H11MO.0.A	2	3.98695e-07	0.000142733	0.000141447	12	CTATAAATAGACC	AGCTAAAAATAGCA	-
PfPVvsNEGrbf9.fwd	MEF2A_MOUSE.H11MO.0.A	2	1.19482e-06	0.000427744	0.000282593	12	CTATAAATAGACC	TGCTAAAAATAGAA	-
PfPVvsNEGrbf9.fwd	TBP_MOUSE.H11MO.0.A	0	0.000341799	0.122364	0.0606308	10	CTATAAATAGACC	CTATAAAAGG	+
PfPVvsNEGrbf9.fwd	CDX1_MOUSE.H11MO.0.C	0	0.00111197	0.398085	0.151125	8	CTATAAATAGACC	ACATAAAT	-
PfPVvsNEGrbf9.fwd	FOXJ2_MOUSE.H11MO.0.C	-3	0.00326024	1.16717	0.28959	10	CTATAAATAGACC	TAAATAAACA	-
PfPVvsNEGrbf9.fwd	DLX5_MOUSE.H11MO.0.C	2	0.00326506	1.16889	0.28959	9	CTATAAATAGACC	ACCTATAATTA	-
PfPVvsNEGrbf9.fwd	FOXO1_MOUSE.H11MO.0.A	-2	0.00519001	1.85802	0.334778	10	CTATAAATAGACC	GTAAACAGGC	-
PfPVvsNEGrbf9.fwd	FOXJ3_MOUSE.H11MO.0.A	-1	0.00783221	2.80393	0.463111	12	CTATAAATAGACC	AAAAAATAAACAA	-
PfPVvsNEGrbf9.fwd	SRF_MOUSE.H11MO.0.A	4	0.0108128	3.87098	0.579572	13	CTATAAATAGACC	ATGGCCAAATAAGGAAA	-
PfPVvsNEGrbf9.fwd	HXA9_MOUSE.H11MO.0.B	0	0.0126799	4.53939	0.579572	11	CTATAAATAGACC	CCATAAATCAT	-
PfPVvsNEGrbf9.fwd	HNF1A_MOUSE.H11MO.0.A	2	0.0132618	4.74774	0.579572	13	CTATAAATAGACC	GGTTAATAATTAACC	+
PfPVvsNEGrbf9.fwd	CDX4_MOUSE.H11MO.0.A	2	0.0138386	4.95422	0.579572	10	CTATAAATAGACC	GGCCATAAATCA	-
PfPVvsNEGrbf9.fwd	SP7_MOUSE.H11MO.0.A	5	0.0138859	4.97116	0.579572	9	CTATAAATAGACC	CAAACCTGTAATTA	+
PfPVvsNEGrbf9.fwd	EVX1_MOUSE.H11MO.0.C	3	0.0153025	5.47829	0.603214	10	CTATAAATAGACC	AGGCCATAAATCA	-
PfPVvsNEGrbf9.fwd	FOXO3_MOUSE.H11MO.0.B	-1	0.0180287	6.45428	0.673276	10	CTATAAATAGACC	TGTAAACAGG	-
PfPVvsNEGrbf9.fwd	HNF6_MOUSE.H11MO.0.A	0	0.0212192	7.59649	0.735442	11	CTATAAATAGACC	AAATCAATAAA	-
PfPVvsNEGrbf9.fwd	FOXP2_MOUSE.H11MO.0.A	-1	0.0218333	7.81634	0.735442	9	CTATAAATAGACC	AGTAAACAA	-
PfPVvsNEGrbf9.fwd	NKX61_MOUSE.H11MO.0.A	0	0.0228029	8.16342	0.735442	13	CTATAAATAGACC	TAATTAAAATCCCATTAAT	-
PfPVvsNEGrbf9.fwd	HAND1_MOUSE.H11MO.0.C	3	0.024258	8.68437	0.748278	13	CTATAAATAGACC	TGACAAAAACCAGACCC	-
PfPVvsNEGrbf9.fwd	ALX1_MOUSE.H11MO.0.B	-2	0.02531	9.06099	0.748278	11	CTATAAATAGACC	ATAATTGGATTA	+
PfPVvsNEGrbf10.fwd	DLX3_MOUSE.H11MO.0.C	-1	0.000448143	0.160435	0.207164	10	TCCTAATTTCATC	GATAATTACA	+
PfPVvsNEGrbf10.fwd	MEF2C_MOUSE.H11MO.0.A	1	0.000779023	0.27889	0.207164	13	TCCTAATTTCATC	GTTCTATTTTTAGCT	+
PfPVvsNEGrbf10.fwd	MEF2D_MOUSE.H11MO.0.A	0	0.000879554	0.31488	0.207164	13	TCCTAATTTCATC	TGCTATTTTTAGCT	+
PfPVvsNEGrbf10.fwd	MEF2A_MOUSE.H11MO.0.A	0	0.0013538	0.484659	0.239148	13	TCCTAATTTCATC	TTCTATTTTTAGCA	+
PfPVvsNEGrbf10.fwd	PRRX2_MOUSE.H11MO.0.C	-2	0.00219644	0.786327	0.310401	7	TCCTAATTTCATC	TTAATTG	+
PfPVvsNEGrbf10.fwd	HXB4_MOUSE.H11MO.0.A	-2	0.00563566	2.01757	0.50236	8	TCCTAATTTCATC	TTAATGGC	+
PfPVvsNEGrbf10.fwd	ALX1_MOUSE.H11MO.0.B	-2	0.00572654	2.0501	0.50236	11	TCCTAATTTCATC	ATAATTGGATTA	+
PfPVvsNEGrbf10.fwd	DDIT3_MOUSE.H11MO.0.C	-5	0.00651481	2.3323	0.50236	8	TCCTAATTTCATC	ATTGCATCAT	-
PfPVvsNEGrbf10.fwd	FOXO1_MOUSE.H11MO.0.A	0	0.0079969	2.86289	0.50236	10	TCCTAATTTCATC	GCCTGTTTAC	+
PfPVvsNEGrbf10.fwd	GATA6_MOUSE.H11MO.0.A	-1	0.0079969	2.86289	0.50236	10	TCCTAATTTCATC	CCTTATCTCC	-
PfPVvsNEGrbf10.fwd	DLX5_MOUSE.H11MO.0.C	-3	0.0082778	2.96345	0.50236	10	TCCTAATTTCATC	TAATTATAGGT	+
PfPVvsNEGrbf10.fwd	GATA2_MOUSE.H11MO.0.A	0	0.00940824	3.36815	0.50236	11	TCCTAATTTCATC	TTCTTATCTGT	-
PfPVvsNEGrbf10.fwd	NOBOX_MOUSE.H11MO.0.C	-2	0.00954464	3.41698	0.50236	9	TCCTAATTTCATC	CTAATTGGT	+
PfPVvsNEGrbf10.fwd	LHX2_MOUSE.H11MO.0.A	-1	0.010438	3.73682	0.50236	10	TCCTAATTTCATC	ACTAATTAAC	-
PfPVvsNEGrbf10.fwd	LHX6_MOUSE.H11MO.0.C	-1	0.0109377	3.9157	0.50236	9	TCCTAATTTCATC	GCTGATTAC	+
PfPVvsNEGrbf10.fwd	LHX3_MOUSE.H11MO.0.C	-1	0.011702	4.18931	0.50236	9	TCCTAATTTCATC	GCTAATTAA	+
PfPVvsNEGrbf10.fwd	PROP1_MOUSE.H11MO.0.C	-3	0.0121026	4.33271	0.50236	10	TCCTAATTTCATC	TAATTGAATTA	+
PfPVvsNEGrbf10.fwd	VSX2_MOUSE.H11MO.0.C	-2	0.0129047	4.61989	0.50236	11	TCCTAATTTCATC	TTAATTAGCTTC	+
PfPVvsNEGrbf10.fwd	GFI1B_MOUSE.H11MO.0.A	-3	0.0135081	4.83591	0.50236	10	TCCTAATTTCATC	AAATCACAGC	-
PfPVvsNEGrbf10.fwd	SP7_MOUSE.H11MO.0.A	-3	0.0145877	5.22238	0.515381	10	TCCTAATTTCATC	TAATTACAGGTTTG	-
PfPVvsNEGrbf10.fwd	RUNX3_MOUSE.H11MO.0.A	-2	0.0195313	6.9922	0.65718	11	TCCTAATTTCATC	CAAACCACAGCC	-
PfPVvsNEGrbf10.fwd	FOXO3_MOUSE.H11MO.0.B	-1	0.0207959	7.44493	0.667926	10	TCCTAATTTCATC	CCTGTTTACA	+
PfPVvsNEGrbf10.fwd	NFAC1_MOUSE.H11MO.0.A	3	0.0234187	8.3839	0.672953	12	TCCTAATTTCATC	GACTCATATTTTCCA	-
PfPVvsNEGrbf10.fwd	SPIB_MOUSE.H11MO.0.A	0	0.0238096	8.52383	0.672953	13	TCCTAATTTCATC	GTTTCACTTCCTCTTTT	-
PfPVvsNEGrbf11.fwd	ERR3_MOUSE.H11MO.0.C	-1	1.33615e-05	0.00478343	0.00954977	10	AGTGTCCTTGAAG	GTGACCTTGA	-
PfPVvsNEGrbf11.fwd	NKX28_MOUSE.H11MO.0.C	-3	4.22295e-05	0.0151182	0.0150911	9	AGTGTCCTTGAAG	GTCCTTGAA	-
PfPVvsNEGrbf11.fwd	NR4A2_MOUSE.H11MO.0.C	-1	0.00571689	2.04664	0.857806	9	AGTGTCCTTGAAG	GTGACCTTT	-
PfPVvsNEGrbf11.fwd	HSF2_MOUSE.H11MO.0.A	2	0.00724238	2.59277	0.857806	12	AGTGTCCTTGAAG	AGAATGTTCTAGAA	+
PfPVvsNEGrbf11.fwd	STF1_MOUSE.H11MO.0.B	-2	0.00816989	2.92482	0.857806	11	AGTGTCCTTGAAG	TGGCCTTGAGC	-
PfPVvsNEGrbf11.fwd	NR5A2_MOUSE.H11MO.0.A	-2	0.010354	3.70674	0.857806	11	AGTGTCCTTGAAG	TGACCTTGAAC	-
PfPVvsNEGrbf11.fwd	STAT4_MOUSE.H11MO.0.A	-2	0.0107758	3.85773	0.857806	10	AGTGTCCTTGAAG	TTTCCCGGAA	+
PfPVvsNEGrbf11.fwd	RARG_MOUSE.H11MO.0.C	7	0.0118642	4.24739	0.857806	11	AGTGTCCTTGAAG	AGGTCAGAGTGACCTGGG	+
PfPVvsNEGrbf11.fwd	STA5A_MOUSE.H11MO.0.A	-2	0.0121719	4.35755	0.857806	10	AGTGTCCTTGAAG	TTTCTTGGAA	-
PfPVvsNEGrbf11.fwd	ERR1_MOUSE.H11MO.0.A	-2	0.0135825	4.86253	0.857806	11	AGTGTCCTTGAAG	TGACCTTGACCT	-
PfPVvsNEGrbf11.fwd	ERR2_MOUSE.H11MO.0.A	2	0.0139542	4.99562	0.857806	13	AGTGTCCTTGAAG	AGGATGACCTTGAACTT	-
PfPVvsNEGrbf11.fwd	PRD14_MOUSE.H11MO.0.A	6	0.0144024	5.15605	0.857806	10	AGTGTCCTTGAAG	AGGGTTAGAGACCTTG	+
PfPVvsNEGrbf11.fwd	NR1H4_MOUSE.H11MO.0.A	6	0.0174918	6.26207	0.961675	13	AGTGTCCTTGAAG	GGGGTCAATGACCCCGAGG	+
PfPVvsNEGrbf11.fwd	THA_MOUSE.H11MO.0.C	-2	0.0204789	7.33144	0.998213	11	AGTGTCCTTGAAG	TGTCCTCAGATGACCTC	-
PfPVvsNEGrbf12.fwd	SRBP1_MOUSE.H11MO.0.B	-3	0.00409724	1.46681	1	10	AGCGCTGAGCTGA	GGTGGGGTGAG	+
PfPVvsNEGrbf12.fwd	THA_MOUSE.H11MO.0.C	0	0.00523605	1.8745	1	13	AGCGCTGAGCTGA	TGTCCTCAGATGACCTC	-
PfPVvsNEGrbf12.fwd	RXRB_MOUSE.H11MO.0.C	-3	0.00628618	2.25045	1	10	AGCGCTGAGCTGA	TGTGACCTCA	-
PfPVvsNEGrbf12.fwd	GATA2_MOUSE.H11MO.0.A	-2	0.0218315	7.81568	1	11	AGCGCTGAGCTGA	TTCTTATCTGT	-
PfPVvsNEGrbf12.fwd	CREM_MOUSE.H11MO.0.C	-2	0.0244498	8.75303	1	11	AGCGCTGAGCTGA	CACTGACGTCA	+
PfPVvsNEGrbf12.fwd	ZN335_MOUSE.H11MO.0.A	6	0.0254144	9.09835	1	13	AGCGCTGAGCTGA	TCAGGCAGCGCCGAGGACAGCC	-
PfPVvsNEGrbf13.fwd	ZN322_MOUSE.H11MO.0.B	9	0.000938233	0.335887	0.365504	11	GCTGAGCCTGGCG	GAGCCTGGTACAGAGCCTGG	+
PfPVvsNEGrbf13.fwd	MAFB_MOUSE.H11MO.0.B	1	0.00137714	0.493017	0.365504	10	GCTGAGCCTGGCG	TGCTGACTCAG	+
PfPVvsNEGrbf13.fwd	ZFX_MOUSE.H11MO.0.B	1	0.00192897	0.69057	0.365504	13	GCTGAGCCTGGCG	GCCGAGGCCTGGGGCCCCC	+
PfPVvsNEGrbf13.fwd	SP2_MOUSE.H11MO.0.B	9	0.00213473	0.764232	0.365504	13	GCTGAGCCTGGCG	GGGGGGGGGGCGGGGCCGGGGG	+
PfPVvsNEGrbf13.fwd	MAF_MOUSE.H11MO.0.A	1	0.00268152	0.959985	0.365504	13	GCTGAGCCTGGCG	TGCTGAGTCAGCAAATT	-
PfPVvsNEGrbf13.fwd	BACH2_MOUSE.H11MO.0.A	1	0.00318885	1.14161	0.365504	10	GCTGAGCCTGGCG	TGCTGAGTCAT	+
PfPVvsNEGrbf13.fwd	MAFG_MOUSE.H11MO.0.A	1	0.00398724	1.42743	0.365504	13	GCTGAGCCTGGCG	TGCTGAGTCAGCAATTTT	-
PfPVvsNEGrbf13.fwd	SP4_MOUSE.H11MO.0.B	9	0.00502129	1.79762	0.365504	11	GCTGAGCCTGGCG	GGGAAGGGGGCGGGGCCGGG	+
PfPVvsNEGrbf13.fwd	MAFF_MOUSE.H11MO.0.A	5	0.00605428	2.16743	0.365504	13	GCTGAGCCTGGCG	TTTTTGCTGAGTCAGCATTTTT	-
PfPVvsNEGrbf13.fwd	BACH1_MOUSE.H11MO.0.C	1	0.00718879	2.57359	0.365504	13	GCTGAGCCTGGCG	TGCTGAGTCATGGT	+
PfPVvsNEGrbf13.fwd	MAFK_MOUSE.H11MO.0.A	3	0.00727887	2.60583	0.365504	13	GCTGAGCCTGGCG	AATGCTGACTCAGCAGTTTT	-
PfPVvsNEGrbf13.fwd	KLF6_MOUSE.H11MO.0.B	6	0.00884573	3.16677	0.387729	13	GCTGAGCCTGGCG	GGAAGGGCGGGGCCGGGGG	+
PfPVvsNEGrbf13.fwd	SP3_MOUSE.H11MO.0.B	8	0.00983327	3.52031	0.387729	12	GCTGAGCCTGGCG	GGGGGGGGGCGGGGCCGGGG	+
PfPVvsNEGrbf13.fwd	JUN_MOUSE.H11MO.0.A	0	0.0112525	4.02838	0.387729	10	GCTGAGCCTGGCG	GGTGAGTCAC	+
PfPVvsNEGrbf13.fwd	KLF5_MOUSE.H11MO.0.A	3	0.0112552	4.02937	0.387729	12	GCTGAGCCTGGCG	GGGGCAGGGTGGGGC	+
PfPVvsNEGrbf13.fwd	ATF3_MOUSE.H11MO.0.A	-1	0.0116691	4.17752	0.387729	9	GCTGAGCCTGGCG	ATGAGTCAC	+
PfPVvsNEGrbf13.fwd	FOSL2_MOUSE.H11MO.0.A	0	0.0121295	4.34236	0.387729	11	GCTGAGCCTGGCG	GATGAGTCACC	+
PfPVvsNEGrbf13.fwd	NF2L2_MOUSE.H11MO.0.A	4	0.0121593	4.35304	0.387729	10	GCTGAGCCTGGCG	AATTGCTGAGTCAT	-
PfPVvsNEGrbf13.fwd	NFE2_MOUSE.H11MO.0.A	4	0.0136204	4.87609	0.396497	10	GCTGAGCCTGGCG	AACTGCTGAGTCAT	-
PfPVvsNEGrbf13.fwd	MYOD1_MOUSE.H11MO.0.A	3	0.0141299	5.05849	0.396497	12	GCTGAGCCTGGCG	GCAGCTGTTCCTGTC	+
PfPVvsNEGrbf13.fwd	SMAD2_MOUSE.H11MO.0.A	-2	0.015078	5.39793	0.40683	9	GCTGAGCCTGGCG	TCTGTCTGG	+
PfPVvsNEGrbf13.fwd	KLF3_MOUSE.H11MO.0.A	8	0.018726	6.70391	0.486545	11	GCTGAGCCTGGCG	GGGGAGGGGCGGGGCCGGG	+
PfPVvsNEGrbf13.fwd	FOSB_MOUSE.H11MO.0.A	-1	0.0205805	7.36783	0.515633	9	GCTGAGCCTGGCG	ATGAGTCAT	+
PfPVvsNEGrbf13.fwd	BHA15_MOUSE.H11MO.0.A	0	0.0243555	8.71927	0.583025	11	GCTGAGCCTGGCG	GCAGCAGCTGG	+
PfPVvsNEGrbf13.fwd	ASCL1_MOUSE.H11MO.0.A	-1	0.0249325	8.92585	0.583025	12	GCTGAGCCTGGCG	CTGCAGCTGCCCCC	+
PfPVvsNEGrbf13.fwd	ESR1_MOUSE.H11MO.0.A	1	0.0272008	9.7379	0.615549	13	GCTGAGCCTGGCG	AGGTCACCCTGACCT	+
snPVvsRandom1.fwd	ERR3_MOUSE.H11MO.0.C	-2	1.63011e-07	5.8358e-05	0.000113943	10	CTGTGACCTTGAT	GTGACCTTGA	-
snPVvsRandom1.fwd	RORA_MOUSE.H11MO.0.C	0	0.000121026	0.0433272	0.0390537	13	CTGTGACCTTGAT	CCCTGACCTAGTT	-
snPVvsRandom1.fwd	NR5A2_MOUSE.H11MO.0.A	-3	0.000237762	0.0851188	0.0390537	10	CTGTGACCTTGAT	TGACCTTGAAC	-
snPVvsRandom1.fwd	ERR1_MOUSE.H11MO.0.A	-3	0.000297144	0.106378	0.0390537	10	CTGTGACCTTGAT	TGACCTTGACCT	-
snPVvsRandom1.fwd	ERR2_MOUSE.H11MO.0.A	1	0.000308128	0.11031	0.0390537	13	CTGTGACCTTGAT	AGGATGACCTTGAACTT	-
snPVvsRandom1.fwd	RARA_MOUSE.H11MO.0.A	-3	0.00033523	0.120012	0.0390537	10	CTGTGACCTTGAT	TGACCTTGAACTTCTGACCC	-
snPVvsRandom1.fwd	NR4A2_MOUSE.H11MO.0.C	-2	0.000407356	0.145834	0.0397935	9	CTGTGACCTTGAT	GTGACCTTT	-
snPVvsRandom1.fwd	STF1_MOUSE.H11MO.0.B	-3	0.00045544	0.163048	0.0397935	10	CTGTGACCTTGAT	TGGCCTTGAGC	-
snPVvsRandom1.fwd	RXRG_MOUSE.H11MO.0.B	-3	0.000928992	0.332579	0.0721506	10	CTGTGACCTTGAT	TGACCTTGAACTCCTGACCCTC	-
snPVvsRandom1.fwd	RXRA_MOUSE.H11MO.0.A	-3	0.00130072	0.465657	0.078711	10	CTGTGACCTTGAT	TGACCTTGAACTCCTGACCCT	-
snPVvsRandom1.fwd	NKX28_MOUSE.H11MO.0.C	-4	0.00134496	0.481494	0.078711	9	CTGTGACCTTGAT	GTCCTTGAA	-
snPVvsRandom1.fwd	NR1D2_MOUSE.H11MO.0.A	2	0.00139253	0.498526	0.078711	13	CTGTGACCTTGAT	CCCTCTGACCCACTTCCCC	-
snPVvsRandom1.fwd	RXRB_MOUSE.H11MO.0.C	-1	0.00152035	0.544286	0.078711	10	CTGTGACCTTGAT	TGTGACCTCA	-
snPVvsRandom1.fwd	COT1_MOUSE.H11MO.0.B	-3	0.00157649	0.564385	0.078711	9	CTGTGACCTTGAT	TGACCTTTG	-
snPVvsRandom1.fwd	VDR_MOUSE.H11MO.0.A	6	0.00367705	1.31638	0.165288	10	CTGTGACCTTGAT	TGAACCCACTGACCCC	-
snPVvsRandom1.fwd	PPARA_MOUSE.H11MO.0.A	4	0.00378347	1.35448	0.165288	13	CTGTGACCTTGAT	TGACCTTTGACCTAGTT	-
snPVvsRandom1.fwd	RORG_MOUSE.H11MO.0.B	-3	0.00624935	2.23727	0.256955	10	CTGTGACCTTGAT	TGACCCACTTTC	-
snPVvsRandom1.fwd	RARG_MOUSE.H11MO.0.C	6	0.00667443	2.38945	0.259187	12	CTGTGACCTTGAT	AGGTCAGAGTGACCTGGG	+
snPVvsRandom1.fwd	ESR2_MOUSE.H11MO.0.A	6	0.00817001	2.92486	0.270164	9	CTGTGACCTTGAT	AGGTCACCCTGACCT	+
snPVvsRandom1.fwd	PPARG_MOUSE.H11MO.0.A	4	0.00839154	3.00417	0.270164	13	CTGTGACCTTGAT	TGACCTTTGCCCCACTT	-
snPVvsRandom1.fwd	NR1D1_MOUSE.H11MO.0.A	2	0.00897613	3.21346	0.270164	13	CTGTGACCTTGAT	CCTTCTGACCCACTTCCCT	-
snPVvsRandom1.fwd	ESR1_MOUSE.H11MO.0.A	6	0.00918583	3.28853	0.270164	9	CTGTGACCTTGAT	AGGTCAGGGTGACCT	-
snPVvsRandom1.fwd	COT2_MOUSE.H11MO.0.A	0	0.00927615	3.32086	0.270164	13	CTGTGACCTTGAT	CTCTGACCTTTGG	-
snPVvsRandom1.fwd	NR2C2_MOUSE.H11MO.0.A	4	0.0123906	4.43582	0.33311	9	CTGTGACCTTGAT	TGACCTTTGACCT	-
snPVvsRandom1.fwd	NR1H4_MOUSE.H11MO.0.A	5	0.0143003	5.11951	0.370214	13	CTGTGACCTTGAT	GGGGTCAATGACCCCGAGG	+
snPVvsRandom1.fwd	SMAD3_MOUSE.H11MO.0.B	2	0.0179807	6.43709	0.448869	10	CTGTGACCTTGAT	CTCTGTCACCTG	+
snPVvsRandom1.fwd	NR4A1_MOUSE.H11MO.0.B	-3	0.0195246	6.98982	0.470604	9	CTGTGACCTTGAT	TGACCTTTT	-
snPVvsRandom1.fwd	GFI1_MOUSE.H11MO.0.C	1	0.0202947	7.26552	0.472861	9	CTGTGACCTTGAT	GCTGTGATTT	+
snPVvsRandom1.fwd	THA_MOUSE.H11MO.0.C	-3	0.0220031	7.8771	0.496127	10	CTGTGACCTTGAT	TGTCCTCAGATGACCTC	-
snPVvsRandom1.fwd	ANDR_MOUSE.H11MO.0.A	6	0.0250563	8.97015	0.547316	10	CTGTGACCTTGAT	GGAACACTCTGTTCCT	+
snPVvsRandom1.fwd	PRD14_MOUSE.H11MO.0.A	6	0.0264246	9.46	0.559713	10	CTGTGACCTTGAT	CAAGGTCTCTAACCCT	-
snPVvsRandom2.fwd	MEF2C_MOUSE.H11MO.0.A	2	2.91004e-13	1.04179e-10	2.04594e-10	13	CTAAAAATAGCCC	AGCTAAAAATAGAAC	-
snPVvsRandom2.fwd	MEF2D_MOUSE.H11MO.0.A	2	3.19751e-11	1.14471e-08	1.12402e-08	12	CTAAAAATAGCCC	AGCTAAAAATAGCA	-
snPVvsRandom2.fwd	MEF2A_MOUSE.H11MO.0.A	2	6.12323e-11	2.19212e-08	1.435e-08	12	CTAAAAATAGCCC	TGCTAAAAATAGAA	-
snPVvsRandom2.fwd	FOXJ3_MOUSE.H11MO.0.A	-1	0.000343867	0.123104	0.0604399	12	CTAAAAATAGCCC	AAAAAATAAACAA	-
snPVvsRandom2.fwd	CDX1_MOUSE.H11MO.0.C	0	0.00151944	0.543959	0.213652	8	CTAAAAATAGCCC	ACATAAAT	-
snPVvsRandom2.fwd	FOXL2_MOUSE.H11MO.0.C	-2	0.00305139	1.0924	0.236517	11	CTAAAAATAGCCC	AAATGTAAACA	-
snPVvsRandom2.fwd	SRF_MOUSE.H11MO.0.A	4	0.00332848	1.1916	0.236517	13	CTAAAAATAGCCC	ATGGCCAAATAAGGAAA	-
snPVvsRandom2.fwd	TBP_MOUSE.H11MO.0.A	0	0.00377393	1.35107	0.236517	10	CTAAAAATAGCCC	CTATAAAAGG	+
snPVvsRandom2.fwd	SOX5_MOUSE.H11MO.0.C	-1	0.00392368	1.40468	0.236517	8	CTAAAAATAGCCC	TAACAATA	-
snPVvsRandom2.fwd	HNF1A_MOUSE.H11MO.0.A	2	0.0040259	1.44127	0.236517	13	CTAAAAATAGCCC	GGTTAATAATTAACC	+
snPVvsRandom2.fwd	FOXJ2_MOUSE.H11MO.0.C	-3	0.00403692	1.44522	0.236517	10	CTAAAAATAGCCC	TAAATAAACA	-
snPVvsRandom2.fwd	SOX2_MOUSE.H11MO.0.A	5	0.00598676	2.14326	0.323774	11	CTAAAAATAGCCC	TTTGCATAACAAAGGA	-
snPVvsRandom2.fwd	NANOG_MOUSE.H11MO.0.A	6	0.00866672	3.10268	0.435231	11	CTAAAAATAGCCC	ATTTGCATAACAAAGGA	-
snPVvsRandom2.fwd	DLX5_MOUSE.H11MO.0.C	2	0.0122278	4.37756	0.481056	9	CTAAAAATAGCCC	ACCTATAATTA	-
snPVvsRandom2.fwd	RUNX3_MOUSE.H11MO.0.A	0	0.0127637	4.56939	0.481056	12	CTAAAAATAGCCC	CAAACCACAGCC	-
snPVvsRandom2.fwd	CDX4_MOUSE.H11MO.0.A	2	0.0143454	5.13566	0.481056	10	CTAAAAATAGCCC	GGCCATAAATCA	-
snPVvsRandom2.fwd	HXA9_MOUSE.H11MO.0.B	0	0.0146076	5.22951	0.481056	11	CTAAAAATAGCCC	CCATAAATCAT	-
snPVvsRandom2.fwd	FOXO1_MOUSE.H11MO.0.A	-2	0.0153619	5.49955	0.481056	10	CTAAAAATAGCCC	GTAAACAGGC	-
snPVvsRandom2.fwd	ARI5B_MOUSE.H11MO.0.C	1	0.0157373	5.63396	0.481056	12	CTAAAAATAGCCC	CACAATACCAACA	-
snPVvsRandom2.fwd	EVX1_MOUSE.H11MO.0.C	3	0.0157373	5.63396	0.481056	10	CTAAAAATAGCCC	AGGCCATAAATCA	-
snPVvsRandom2.fwd	PO5F1_MOUSE.H11MO.0.A	6	0.0166062	5.94503	0.486467	10	CTAAAAATAGCCC	ATTTGCATAACAATGG	-
snPVvsRandom2.fwd	AIRE_MOUSE.H11MO.0.C	4	0.0174323	6.24076	0.490239	13	CTAAAAATAGCCC	TTAACCAATATAACCAAT	-
snPVvsRandom2.fwd	FOXQ1_MOUSE.H11MO.0.C	-4	0.0191081	6.84071	0.504225	9	CTAAAAATAGCCC	AAATAAACAATT	-
snPVvsRandom2.fwd	HNF1B_MOUSE.H11MO.0.A	2	0.019364	6.93232	0.504225	13	CTAAAAATAGCCC	AGTTAATGATTAACT	+
snPVvsRandom3.fwd	MAFK_MOUSE.H11MO.0.A	7	0.000698907	0.250209	0.394789	13	ACACTGCAGCTTC	AATGCTGACTCAGCAGTTTT	-
snPVvsRandom3.fwd	ASCL1_MOUSE.H11MO.0.A	-3	0.0011072	0.396377	0.394789	10	ACACTGCAGCTTC	CTGCAGCTGCCCCC	+
snPVvsRandom3.fwd	MAFG_MOUSE.H11MO.0.A	5	0.00178942	0.640612	0.425364	13	ACACTGCAGCTTC	TGCTGAGTCAGCAATTTT	-
snPVvsRandom3.fwd	MAF_MOUSE.H11MO.0.A	5	0.00432316	1.54769	0.559181	12	ACACTGCAGCTTC	TGCTGAGTCAGCAAATT	-
snPVvsRandom3.fwd	PRDM9_MOUSE.H11MO.0.C	4	0.00550015	1.96905	0.559181	13	ACACTGCAGCTTC	AAGATGGCAGCAGCATCTG	+
snPVvsRandom3.fwd	MAFF_MOUSE.H11MO.0.A	9	0.00599299	2.14549	0.559181	13	ACACTGCAGCTTC	TTTTTGCTGAGTCAGCATTTTT	-
snPVvsRandom3.fwd	TFE2_MOUSE.H11MO.0.A	-3	0.00664711	2.37967	0.559181	10	ACACTGCAGCTTC	CTGCAGCTGTG	-
snPVvsRandom3.fwd	NFE2_MOUSE.H11MO.0.A	3	0.00676218	2.42086	0.559181	11	ACACTGCAGCTTC	ATGACTCAGCAGTT	+
snPVvsRandom3.fwd	MYOG_MOUSE.H11MO.0.A	-3	0.00731424	2.6185	0.559181	10	ACACTGCAGCTTC	CCGCAGCTGTCCC	+
snPVvsRandom3.fwd	ATF4_MOUSE.H11MO.0.A	-2	0.011525	4.12597	0.74717	11	ACACTGCAGCTTC	ATTGCATCATCC	-
snPVvsRandom3.fwd	NF2L2_MOUSE.H11MO.0.A	3	0.0139702	5.00133	0.766353	11	ACACTGCAGCTTC	ATGACTCAGCAATT	+
snPVvsRandom3.fwd	CEBPG_MOUSE.H11MO.0.B	-2	0.0185169	6.62906	0.908057	11	ACACTGCAGCTTC	ATTGCATCATCC	-
snPVvsRandom3.fwd	SNAI2_MOUSE.H11MO.0.A	-3	0.0191001	6.83783	0.908057	10	ACACTGCAGCTTC	ATGCACCTGCC	-
snPVvsRandom3.fwd	NRF1_MOUSE.H11MO.0.A	-1	0.0261891	9.37571	0.995993	12	ACACTGCAGCTTC	CACTGCGCATGCGCAGG	+
snPVvsRandom3.fwd	ASCL2_MOUSE.H11MO.0.C	-5	0.0264021	9.45194	0.995993	8	ACACTGCAGCTTC	CCAGCTGCT	+
snPVvsRandom3.fwd	BACH2_MOUSE.H11MO.0.A	-4	0.0270376	9.67948	0.995993	9	ACACTGCAGCTTC	TGCTGAGTCAT	+
snPVvsRandom4.fwd	LHX6_MOUSE.H11MO.0.C	-2	2.71294e-07	9.71233e-05	0.00018977	9	CTGTAATCAGCAT	GTAATCAGC	-
snPVvsRandom4.fwd	FOXO3_MOUSE.H11MO.0.B	-1	0.000137333	0.0491654	0.0480322	10	CTGTAATCAGCAT	TGTAAACAGG	-
snPVvsRandom4.fwd	DLX3_MOUSE.H11MO.0.C	-1	0.000352127	0.126061	0.0543008	10	CTGTAATCAGCAT	TGTAATTATC	-
snPVvsRandom4.fwd	LHX3_MOUSE.H11MO.0.C	-2	0.000353707	0.126627	0.0543008	9	CTGTAATCAGCAT	TTAATTAGC	-
snPVvsRandom4.fwd	FOXP2_MOUSE.H11MO.0.A	-1	0.000388141	0.138955	0.0543008	9	CTGTAATCAGCAT	AGTAAACAA	-
snPVvsRandom4.fwd	PBX3_MOUSE.H11MO.0.A	2	0.0009795	0.350661	0.0981172	12	CTGTAATCAGCAT	CCAGCCAATCAGAG	-
snPVvsRandom4.fwd	FOXA2_MOUSE.H11MO.0.A	1	0.000981877	0.351512	0.0981172	12	CTGTAATCAGCAT	AAAGTAAACAAGG	-
snPVvsRandom4.fwd	HXB7_MOUSE.H11MO.0.C	0	0.00134358	0.481001	0.117479	10	CTGTAATCAGCAT	CATTAATCAA	-
snPVvsRandom4.fwd	HXB8_MOUSE.H11MO.0.C	1	0.00183724	0.657732	0.142794	10	CTGTAATCAGCAT	GCATTAATCAA	-
snPVvsRandom4.fwd	PRRX2_MOUSE.H11MO.0.C	-3	0.00244937	0.876875	0.151432	7	CTGTAATCAGCAT	CAATTAA	-
snPVvsRandom4.fwd	FOXO1_MOUSE.H11MO.0.A	-2	0.00247095	0.884602	0.151432	10	CTGTAATCAGCAT	GTAAACAGGC	-
snPVvsRandom4.fwd	NKX21_MOUSE.H11MO.0.A	-2	0.00266135	0.952764	0.151432	10	CTGTAATCAGCAT	CCACTCAAGA	-
snPVvsRandom4.fwd	NFYC_MOUSE.H11MO.0.B	2	0.00288197	1.03175	0.151432	12	CTGTAATCAGCAT	TCAGCCAATCAGAA	+
snPVvsRandom4.fwd	FOXK1_MOUSE.H11MO.0.A	0	0.00303081	1.08503	0.151432	11	CTGTAATCAGCAT	ATGTAAACAAG	-
snPVvsRandom4.fwd	FOXA3_MOUSE.H11MO.0.A	2	0.00354341	1.26854	0.154791	11	CTGTAATCAGCAT	CAAAGTAAACAAG	-
snPVvsRandom4.fwd	HXB4_MOUSE.H11MO.0.A	-2	0.00360371	1.29013	0.154791	8	CTGTAATCAGCAT	GCCATTAA	-
snPVvsRandom4.fwd	NFYA_MOUSE.H11MO.0.A	2	0.00378204	1.35397	0.154791	12	CTGTAATCAGCAT	TCAGCCAATCAGAA	+
snPVvsRandom4.fwd	NOBOX_MOUSE.H11MO.0.C	-1	0.00404552	1.44829	0.154791	9	CTGTAATCAGCAT	ACCAATTAG	-
snPVvsRandom4.fwd	ISL1_MOUSE.H11MO.0.A	-2	0.00435444	1.55889	0.154791	9	CTGTAATCAGCAT	TCCATTAGC	-
snPVvsRandom4.fwd	NKX25_MOUSE.H11MO.0.A	-2	0.00442578	1.58443	0.154791	10	CTGTAATCAGCAT	CCACTCCAGA	-
snPVvsRandom4.fwd	NFYB_MOUSE.H11MO.0.A	1	0.00728045	2.6064	0.242507	12	CTGTAATCAGCAT	CAGCCAATCAGAG	+
snPVvsRandom4.fwd	DLX5_MOUSE.H11MO.0.C	2	0.010723	3.83885	0.340943	9	CTGTAATCAGCAT	ACCTATAATTA	-
snPVvsRandom4.fwd	FOXD3_MOUSE.H11MO.0.C	4	0.0123297	4.41404	0.374983	11	CTGTAATCAGCAT	TGCTAAGTAAACAAA	-
snPVvsRandom4.fwd	FOXA1_MOUSE.H11MO.0.A	1	0.0147223	5.27058	0.429092	9	CTGTAATCAGCAT	TATGTAAACA	-
snPVvsRandom4.fwd	FOXL2_MOUSE.H11MO.0.C	2	0.0164833	5.90101	0.459227	9	CTGTAATCAGCAT	AAATGTAAACA	-
snPVvsRandom4.fwd	PROP1_MOUSE.H11MO.0.C	2	0.0174986	6.2645	0.459227	9	CTGTAATCAGCAT	TAATTCAATTA	-
snPVvsRandom4.fwd	FOXI1_MOUSE.H11MO.0.B	0	0.0177258	6.34582	0.459227	12	CTGTAATCAGCAT	AACCAATCAGAG	-
snPVvsRandom4.fwd	BARX1_MOUSE.H11MO.0.C	1	0.0199264	7.13363	0.464614	11	CTGTAATCAGCAT	AAAACAATTAAA	-
snPVvsRandom4.fwd	ALX1_MOUSE.H11MO.0.B	2	0.0199264	7.13363	0.464614	10	CTGTAATCAGCAT	TAATTCAATTAT	-
snPVvsRandom4.fwd	FOXM1_MOUSE.H11MO.0.B	3	0.0199264	7.13363	0.464614	9	CTGTAATCAGCAT	GCAAAGCAAACA	-
snPVvsRandom4.fwd	TBX20_MOUSE.H11MO.0.C	-1	0.0215937	7.73054	0.487249	12	CTGTAATCAGCAT	ACCTGTCAGCACCT	-
snPVvsRandom4.fwd	NFE2_MOUSE.H11MO.0.A	-1	0.0228673	8.18648	0.499862	12	CTGTAATCAGCAT	ATGACTCAGCAGTT	+
snPVvsRandom4.fwd	VSX2_MOUSE.H11MO.0.C	-2	0.0250654	8.9734	0.511959	11	CTGTAATCAGCAT	TTAATTAGCTTC	+
snPVvsRandom4.fwd	HXA1_MOUSE.H11MO.0.C	0	0.0253375	9.07084	0.511959	10	CTGTAATCAGCAT	CATCCATCAA	-
snPVvsRandom4.fwd	NF2L2_MOUSE.H11MO.0.A	-1	0.0256164	9.17065	0.511959	12	CTGTAATCAGCAT	ATGACTCAGCAATT	+
snPVvsRandom4.fwd	SP7_MOUSE.H11MO.0.A	5	0.0270976	9.70093	0.526519	9	CTGTAATCAGCAT	CAAACCTGTAATTA	+
snPVvsRandom5.fwd	MAFG_MOUSE.H11MO.0.A	2	4.28779e-07	0.000153503	0.000300578	13	AATTGCTGACTTC	AAAATTGCTGACTCAGCA	+
snPVvsRandom5.fwd	MAF_MOUSE.H11MO.0.A	1	1.54753e-06	0.000554016	0.000460149	13	AATTGCTGACTTC	AATTTGCTGACTCAGCA	+
snPVvsRandom5.fwd	NF2L2_MOUSE.H11MO.0.A	0	2.62564e-06	0.000939978	0.000460149	13	AATTGCTGACTTC	AATTGCTGAGTCAT	-
snPVvsRandom5.fwd	NFE2_MOUSE.H11MO.0.A	0	2.62564e-06	0.000939978	0.000460149	13	AATTGCTGACTTC	AACTGCTGAGTCAT	-
snPVvsRandom5.fwd	MAFK_MOUSE.H11MO.0.A	2	7.86801e-06	0.00281675	0.00110311	13	AATTGCTGACTTC	AAAACTGCTGAGTCAGCATT	+
snPVvsRandom5.fwd	MAFF_MOUSE.H11MO.0.A	1	1.45874e-05	0.00522229	0.00170432	13	AATTGCTGACTTC	TTTTTGCTGAGTCAGCATTTTT	-
snPVvsRandom5.fwd	MAFB_MOUSE.H11MO.0.B	-3	6.22494e-05	0.0222853	0.00623392	10	AATTGCTGACTTC	TGCTGACTCAG	+
snPVvsRandom5.fwd	BACH2_MOUSE.H11MO.0.A	-3	0.000902905	0.32324	0.0703273	10	AATTGCTGACTTC	TGCTGAGTCAT	+
snPVvsRandom5.fwd	BACH1_MOUSE.H11MO.0.C	-3	0.00220788	0.790421	0.128979	10	AATTGCTGACTTC	TGCTGAGTCATGGT	+
snPVvsRandom5.fwd	NR2E3_MOUSE.H11MO.0.C	1	0.00251653	0.900916	0.135701	13	AATTGCTGACTTC	TGACTTTTGACTTT	-
snPVvsRandom5.fwd	FOXA1_MOUSE.H11MO.0.A	-3	0.0031236	1.11825	0.156405	10	AATTGCTGACTTC	TGTTTACATA	+
snPVvsRandom5.fwd	PRDM9_MOUSE.H11MO.0.C	4	0.00360367	1.29012	0.168414	13	AATTGCTGACTTC	CAGATGCTGCTGCCATCTT	-
snPVvsRandom5.fwd	NR1I3_MOUSE.H11MO.0.C	5	0.00565506	2.02451	0.247766	13	AATTGCTGACTTC	CTGAACTTTCCTGACCCC	-
snPVvsRandom5.fwd	RXRA_MOUSE.H11MO.0.A	8	0.00604951	2.16572	0.249457	13	AATTGCTGACTTC	TGACCTTGAACTCCTGACCCT	-
snPVvsRandom5.fwd	RXRG_MOUSE.H11MO.0.B	8	0.00701915	2.51285	0.264166	13	AATTGCTGACTTC	TGACCTTGAACTCCTGACCCTC	-
snPVvsRandom5.fwd	FOXQ1_MOUSE.H11MO.0.C	0	0.00794527	2.84441	0.270309	12	AATTGCTGACTTC	TATTGTTTATTT	+
snPVvsRandom5.fwd	FOXA3_MOUSE.H11MO.0.A	-1	0.00809758	2.89894	0.270309	12	AATTGCTGACTTC	CTTGTTTACTTTG	+
snPVvsRandom5.fwd	FOXP2_MOUSE.H11MO.0.A	-2	0.00948093	3.39417	0.302101	9	AATTGCTGACTTC	TTGTTTACT	+
snPVvsRandom5.fwd	FOXC1_MOUSE.H11MO.0.C	0	0.0100101	3.58362	0.305095	13	AATTGCTGACTTC	CGTTGTTTACTTAAG	+
snPVvsRandom5.fwd	EVX2_MOUSE.H11MO.0.A	-1	0.0120632	4.31862	0.33856	12	AATTGCTGACTTC	TTTTATTGCTTT	+
snPVvsRandom5.fwd	RARA_MOUSE.H11MO.0.A	8	0.012074	4.32249	0.33856	12	AATTGCTGACTTC	TGACCTTGAACTTCTGACCC	-
snPVvsRandom5.fwd	ETV2_MOUSE.H11MO.0.A	3	0.0140415	5.02685	0.378585	13	AATTGCTGACTTC	CCCACTTCCTGTTTCC	-
snPVvsRandom5.fwd	CDX2_MOUSE.H11MO.0.A	-1	0.0151953	5.43993	0.394522	12	AATTGCTGACTTC	TTTTATGGCCTT	+
snPVvsRandom5.fwd	PTF1A_MOUSE.H11MO.0.A	2	0.0173012	6.19383	0.433154	13	AATTGCTGACTTC	CCAGCTGCCCCCTTTCCC	+
snPVvsRandom5.fwd	CREB1_MOUSE.H11MO.0.A	-3	0.0220647	7.89917	0.524144	10	AATTGCTGACTTC	CGATGACGTCA	+
snPVvsRandom5.fwd	TEAD4_MOUSE.H11MO.0.A	1	0.0232225	8.31364	0.524144	13	AATTGCTGACTTC	ACATTCCTGGCATTC	+
snPVvsRandom5.fwd	FOSL2_MOUSE.H11MO.0.A	-4	0.0233365	8.35447	0.524144	9	AATTGCTGACTTC	GGTGACTCATC	-
snPVvsRandom5.fwd	FOXD3_MOUSE.H11MO.0.C	-1	0.0245024	8.77185	0.524144	12	AATTGCTGACTTC	TTTGTTTACTTAGCA	+
snPVvsRandom5.fwd	FOXL2_MOUSE.H11MO.0.C	-3	0.0246741	8.83331	0.524144	10	AATTGCTGACTTC	TGTTTACATTT	+
snPVvsRandom5.fwd	COT2_MOUSE.H11MO.0.A	-3	0.0265151	9.4924	0.546686	10	AATTGCTGACTTC	CTCTGACCTTTGG	-
snPVvsRandom5.fwd	ZFP42_MOUSE.H11MO.0.A	2	0.0278966	9.98699	0.558738	10	AATTGCTGACTTC	AAAATGGCTGCC	-
snPVvsRandom6.fwd	TFE2_MOUSE.H11MO.0.A	-1	1.67335e-06	0.000599059	0.0011688	11	AATGCAGCTGGGT	CTGCAGCTGTG	-
snPVvsRandom6.fwd	BHA15_MOUSE.H11MO.0.A	0	3.4785e-05	0.012453	0.0121483	11	AATGCAGCTGGGT	GCAGCAGCTGG	+
snPVvsRandom6.fwd	ASCL2_MOUSE.H11MO.0.C	-2	0.000102052	0.0365346	0.0184749	9	AATGCAGCTGGGT	AGCAGCTGG	-
snPVvsRandom6.fwd	MYF6_MOUSE.H11MO.0.C	-3	0.000105801	0.0378768	0.0184749	7	AATGCAGCTGGGT	GCAGCTG	-
snPVvsRandom6.fwd	HTF4_MOUSE.H11MO.0.A	-2	0.000160079	0.0573083	0.0223623	10	AATGCAGCTGGGT	AGCAGGTGGG	+
snPVvsRandom6.fwd	OLIG2_MOUSE.H11MO.0.A	7	0.000282414	0.101104	0.0289828	11	AATGCAGCTGGGT	CAGAAGGGAAACAGCTGG	-
snPVvsRandom6.fwd	LYL1_MOUSE.H11MO.0.A	3	0.00029046	0.103985	0.0289828	11	AATGCAGCTGGGT	CAGGAAACAGCTGG	-
snPVvsRandom6.fwd	ATOH1_MOUSE.H11MO.0.B	-2	0.000375222	0.134329	0.0327605	9	AATGCAGCTGGGT	AGCAGATGG	+
snPVvsRandom6.fwd	MYOG_MOUSE.H11MO.0.A	0	0.000770407	0.275806	0.0555681	13	AATGCAGCTGGGT	GGGACAGCTGCGG	-
snPVvsRandom6.fwd	PTF1A_MOUSE.H11MO.0.A	7	0.000795561	0.284811	0.0555681	11	AATGCAGCTGGGT	GGGAAAGGGGGCAGCTGG	-
snPVvsRandom6.fwd	ITF2_MOUSE.H11MO.0.B	-2	0.00096015	0.343734	0.0609675	9	AATGCAGCTGGGT	TGCACCTGG	-
snPVvsRandom6.fwd	ASCL1_MOUSE.H11MO.0.A	1	0.00207753	0.743757	0.120926	13	AATGCAGCTGGGT	GGGGGCAGCTGCAG	-
snPVvsRandom6.fwd	NGN2_MOUSE.H11MO.0.C	0	0.00361316	1.29351	0.180265	12	AATGCAGCTGGGT	GGAGCAGATGGC	+
snPVvsRandom6.fwd	NDF2_MOUSE.H11MO.0.A	-2	0.00401421	1.43709	0.186922	10	AATGCAGCTGGGT	AACAGATGGC	+
snPVvsRandom6.fwd	SNAI2_MOUSE.H11MO.0.A	-1	0.00488887	1.75022	0.213423	11	AATGCAGCTGGGT	ATGCACCTGCC	-
snPVvsRandom6.fwd	HEN1_MOUSE.H11MO.0.C	3	0.00532198	1.90527	0.218316	13	AATGCAGCTGGGT	TGGGGAGCAGCTGCGTCCCT	+
snPVvsRandom6.fwd	MYB_MOUSE.H11MO.0.A	1	0.00562609	2.01414	0.218316	11	AATGCAGCTGGGT	GGTGGCAGTTGG	+
snPVvsRandom6.fwd	MYOD1_MOUSE.H11MO.0.A	4	0.00706345	2.52871	0.259666	11	AATGCAGCTGGGT	GACAGGAACAGCTGC	-
snPVvsRandom6.fwd	SNAI1_MOUSE.H11MO.0.C	-3	0.00843554	3.01992	0.294602	8	AATGCAGCTGGGT	CCAGGTGG	+
snPVvsRandom6.fwd	TWST1_MOUSE.H11MO.0.B	-3	0.00922618	3.30297	0.301594	10	AATGCAGCTGGGT	ACATCTGGTTTTAATTA	+
snPVvsRandom6.fwd	NDF1_MOUSE.H11MO.0.A	-2	0.00949934	3.40076	0.301594	10	AATGCAGCTGGGT	GACAGATGGT	+
snPVvsRandom6.fwd	NFE2_MOUSE.H11MO.0.A	-2	0.0136814	4.89793	0.353931	11	AATGCAGCTGGGT	AACTGCTGAGTCAT	-
snPVvsRandom6.fwd	MAFK_MOUSE.H11MO.0.A	0	0.0146589	5.24788	0.35962	13	AATGCAGCTGGGT	AAAACTGCTGAGTCAGCATT	+
snPVvsRandom6.fwd	TGIF1_MOUSE.H11MO.0.A	-4	0.0167847	6.00892	0.378185	9	AATGCAGCTGGGT	CAGCTGTCA	-
snPVvsRandom6.fwd	NF2L2_MOUSE.H11MO.0.A	-2	0.0212431	7.60504	0.449631	11	AATGCAGCTGGGT	AATTGCTGAGTCAT	-
snPVvsRandom7.fwd	MEF2D_MOUSE.H11MO.0.A	-1	2.35862e-05	0.00844384	0.0166294	12	ATCCTAATTATAG	TGCTATTTTTAGCT	+
snPVvsRandom7.fwd	MEF2C_MOUSE.H11MO.0.A	0	6.9012e-05	0.0247063	0.0181102	13	ATCCTAATTATAG	GTTCTATTTTTAGCT	+
snPVvsRandom7.fwd	DLX5_MOUSE.H11MO.0.C	-4	7.7059e-05	0.0275871	0.0181102	9	ATCCTAATTATAG	TAATTATAGGT	+
snPVvsRandom7.fwd	MEF2A_MOUSE.H11MO.0.A	-1	0.000135166	0.0483893	0.0238247	12	ATCCTAATTATAG	TTCTATTTTTAGCA	+
snPVvsRandom7.fwd	ALX1_MOUSE.H11MO.0.B	1	0.000255919	0.0916189	0.0360871	11	ATCCTAATTATAG	TAATTCAATTAT	-
snPVvsRandom7.fwd	SP7_MOUSE.H11MO.0.A	-4	0.000314008	0.112415	0.0368985	9	ATCCTAATTATAG	TAATTACAGGTTTG	-
snPVvsRandom7.fwd	DLX3_MOUSE.H11MO.0.C	-2	0.000531203	0.190171	0.0535036	10	ATCCTAATTATAG	GATAATTACA	+
snPVvsRandom7.fwd	VSX2_MOUSE.H11MO.0.C	1	0.000784341	0.280794	0.06343	11	ATCCTAATTATAG	GAAGCTAATTAA	-
snPVvsRandom7.fwd	PRRX2_MOUSE.H11MO.0.C	-3	0.00123532	0.442244	0.0725802	7	ATCCTAATTATAG	TTAATTG	+
snPVvsRandom7.fwd	PROP1_MOUSE.H11MO.0.C	1	0.00241583	0.864868	0.131022	10	ATCCTAATTATAG	TAATTCAATTA	-
snPVvsRandom7.fwd	BARX1_MOUSE.H11MO.0.C	-2	0.00643804	2.30482	0.302609	11	ATCCTAATTATAG	TTTAATTGTTTT	+
snPVvsRandom7.fwd	LHX2_MOUSE.H11MO.0.A	-2	0.00732438	2.62213	0.322753	10	ATCCTAATTATAG	ACTAATTAAC	-
snPVvsRandom7.fwd	FOXO3_MOUSE.H11MO.0.B	-2	0.00832175	2.97919	0.345132	10	ATCCTAATTATAG	CCTGTTTACA	+
snPVvsRandom7.fwd	FOXO1_MOUSE.H11MO.0.A	-1	0.00944117	3.37994	0.369806	10	ATCCTAATTATAG	GCCTGTTTAC	+
snPVvsRandom7.fwd	HNF1A_MOUSE.H11MO.0.A	-1	0.0157818	5.6499	0.529857	12	ATCCTAATTATAG	GGTTAATTATTAACC	-
snPVvsRandom7.fwd	HXB4_MOUSE.H11MO.0.A	-3	0.0166243	5.95149	0.532771	8	ATCCTAATTATAG	TTAATGGC	+
snPVvsRandom7.fwd	HNF1B_MOUSE.H11MO.0.A	-1	0.0177392	6.35064	0.543784	12	ATCCTAATTATAG	AGTTAATCATTAACT	-
snPVvsRandom7.fwd	LHX3_MOUSE.H11MO.0.C	-2	0.0225669	8.07895	0.590537	9	ATCCTAATTATAG	GCTAATTAA	+
snPVvsRandom7.fwd	NFAC4_MOUSE.H11MO.0.C	0	0.0234523	8.39591	0.590537	10	ATCCTAATTATAG	AGGAAAATTT	+
snPVvsRandom7.fwd	TBP_MOUSE.H11MO.0.A	-3	0.0234523	8.39591	0.590537	10	ATCCTAATTATAG	CCTTTTATAG	-
snPVvsRandom7.fwd	LHX6_MOUSE.H11MO.0.C	-2	0.0269437	9.64584	0.6401	9	ATCCTAATTATAG	GCTGATTAC	+
snPVvsRandom7.fwd	CRX_MOUSE.H11MO.0.A	-2	0.0274863	9.8401	0.6401	11	ATCCTAATTATAG	CCTAATCCTCTTA	-
snPVvsRandom8.fwd	DDIT3_MOUSE.H11MO.0.C	-3	0.000151577	0.0542646	0.108465	10	TCGCTGATGAAGT	ATGATGCAAT	+
snPVvsRandom8.fwd	LHX3_MOUSE.H11MO.0.C	-2	0.00125081	0.447791	0.447527	9	TCGCTGATGAAGT	GCTAATTAA	+
snPVvsRandom8.fwd	CEBPG_MOUSE.H11MO.0.B	-1	0.00324055	1.16012	0.772955	12	TCGCTGATGAAGT	GGATGATGCAAT	+
snPVvsRandom8.fwd	LHX6_MOUSE.H11MO.0.C	-2	0.00476992	1.70763	0.853313	9	TCGCTGATGAAGT	GCTGATTAC	+
snPVvsRandom8.fwd	ATF4_MOUSE.H11MO.0.A	-1	0.00605556	2.16789	0.86598	12	TCGCTGATGAAGT	GGATGATGCAAT	+
snPVvsRandom8.fwd	STAT6_MOUSE.H11MO.0.A	2	0.00823147	2.94687	0.86598	12	TCGCTGATGAAGT	CAGTTCTCAGGAAA	-
snPVvsRandom8.fwd	ETV4_MOUSE.H11MO.0.B	-5	0.00847128	3.03272	0.86598	8	TCGCTGATGAAGT	CAGGAAGT	+
snPVvsRandom8.fwd	ISL1_MOUSE.H11MO.0.A	-2	0.0114849	4.11158	0.99941	9	TCGCTGATGAAGT	GCTAATGGA	+
snPVvsRandom8.fwd	CREB1_MOUSE.H11MO.0.A	-4	0.0134592	4.81838	0.99941	9	TCGCTGATGAAGT	CGATGACGTCA	+
snPVvsRandom8.fwd	MAFB_MOUSE.H11MO.0.B	-1	0.0142716	5.10923	0.99941	11	TCGCTGATGAAGT	TGCTGACTCAG	+
snPVvsRandom8.fwd	PBX3_MOUSE.H11MO.0.A	-1	0.0212732	7.6158	0.99941	12	TCGCTGATGAAGT	CTCTGATTGGCTGG	+
snPVvsRandom8.fwd	PIT1_MOUSE.H11MO.0.C	-3	0.0278197	9.95946	0.99941	10	TCGCTGATGAAGT	CTCATGAATATAT	+
snPVvsRandom9.fwd	MEF2A_MOUSE.H11MO.0.A	-1	7.00179e-05	0.0250664	0.0331569	12	GTTCTAAATATAG	TGCTAAAAATAGAA	-
snPVvsRandom9.fwd	MEF2C_MOUSE.H11MO.0.A	0	9.29326e-05	0.0332699	0.0331569	13	GTTCTAAATATAG	GTTCTATTTTTAGCT	+
snPVvsRandom9.fwd	MEF2D_MOUSE.H11MO.0.A	-1	0.000260933	0.0934139	0.0465483	12	GTTCTAAATATAG	AGCTAAAAATAGCA	-
snPVvsRandom9.fwd	DLX5_MOUSE.H11MO.0.C	-4	0.00587425	2.10298	0.598811	9	GTTCTAAATATAG	TAATTATAGGT	+
snPVvsRandom9.fwd	SRF_MOUSE.H11MO.0.A	0	0.00718533	2.57235	0.640902	13	GTTCTAAATATAG	TTTCCTTATTTGGCCAT	+
snPVvsRandom9.fwd	SP7_MOUSE.H11MO.0.A	-4	0.023907	8.5587	0.996603	9	GTTCTAAATATAG	TAATTACAGGTTTG	-
snPVvsRandom9.fwd	TBP_MOUSE.H11MO.0.A	-3	0.0252291	9.03201	0.996603	10	GTTCTAAATATAG	CTATAAAAGG	+
snPVvsRandom9.fwd	FOXD3_MOUSE.H11MO.0.C	0	0.0260855	9.33862	0.996603	13	GTTCTAAATATAG	TTTGTTTACTTAGCA	+
snPVvsRandom9.fwd	FOXJ2_MOUSE.H11MO.0.C	-4	0.0267011	9.55899	0.996603	9	GTTCTAAATATAG	TAAATAAACA	-
snPVvsRandom10.fwd	MITF_MOUSE.H11MO.0.A	-1	1.65801e-06	0.000593568	0.00116738	10	GAGTCACGTGGTA	AGTCACGTGG	-
snPVvsRandom10.fwd	TFEB_MOUSE.H11MO.0.C	-1	4.43327e-06	0.00158711	0.00156069	9	GAGTCACGTGGTA	GGTCACGTG	+
snPVvsRandom10.fwd	BMAL1_MOUSE.H11MO.0.A	-2	8.96195e-06	0.00320838	0.00210331	9	GAGTCACGTGGTA	GTCACGTGG	-
snPVvsRandom10.fwd	TFE3_MOUSE.H11MO.0.A	-1	0.000212853	0.0762014	0.0374665	10	GAGTCACGTGGTA	GGTCACGTGA	+
snPVvsRandom10.fwd	BHE40_MOUSE.H11MO.0.A	-2	0.00029499	0.105606	0.0415394	9	GAGTCACGTGGTA	GTCACGTGC	-
snPVvsRandom10.fwd	MYCN_MOUSE.H11MO.0.A	-3	0.000755299	0.270397	0.0795877	8	GAGTCACGTGGTA	CCACGTGG	+
snPVvsRandom10.fwd	USF1_MOUSE.H11MO.0.A	0	0.000791263	0.283272	0.0795877	13	GAGTCACGTGGTA	GGGTCACGTGGCC	+
snPVvsRandom10.fwd	USF2_MOUSE.H11MO.0.A	0	0.00131109	0.469369	0.115389	13	GAGTCACGTGGTA	GGGTCACGTGGCCGCGGCG	+
snPVvsRandom10.fwd	ARNT_MOUSE.H11MO.0.B	-3	0.00352451	1.26177	0.239628	8	GAGTCACGTGGTA	TCACGTGC	+
snPVvsRandom10.fwd	EPAS1_MOUSE.H11MO.0.C	-2	0.00381918	1.36727	0.239628	9	GAGTCACGTGGTA	GGCACGTAC	-
snPVvsRandom10.fwd	ASCL1_MOUSE.H11MO.0.A	1	0.00408409	1.4621	0.239628	13	GAGTCACGTGGTA	GGGGGCAGCTGCAG	-
snPVvsRandom10.fwd	MXI1_MOUSE.H11MO.0.A	4	0.00542018	1.94042	0.293558	11	GAGTCACGTGGTA	CCCGCCGCCACGTGC	-
snPVvsRandom10.fwd	NF2L1_MOUSE.H11MO.0.C	-1	0.00721498	2.58296	0.362852	7	GAGTCACGTGGTA	AGTCATT	+
snPVvsRandom10.fwd	INSM1_MOUSE.H11MO.0.C	-1	0.00842309	3.01547	0.393384	12	GAGTCACGTGGTA	TGTCAGGGGGCA	+
snPVvsRandom10.fwd	JUNB_MOUSE.H11MO.0.A	2	0.0090112	3.22601	0.393384	7	GAGTCACGTGGTA	ATGAGTCAC	+
snPVvsRandom10.fwd	PAX6_MOUSE.H11MO.0.C	-1	0.00949822	3.40036	0.393384	12	GAGTCACGTGGTA	AGTCAAGCGGAA	-
snPVvsRandom10.fwd	STAT6_MOUSE.H11MO.0.A	0	0.0113503	4.06341	0.443975	13	GAGTCACGTGGTA	CAGTTCTCAGGAAA	-
snPVvsRandom10.fwd	ATF3_MOUSE.H11MO.0.A	2	0.0125705	4.50023	0.465823	7	GAGTCACGTGGTA	ATGAGTCAC	+
snPVvsRandom10.fwd	MAX_MOUSE.H11MO.0.A	-1	0.0143578	5.1401	0.498305	11	GAGTCACGTGGTA	GAGCACGTGGC	+
snPVvsRandom10.fwd	CLOCK_MOUSE.H11MO.0.C	0	0.0150783	5.39801	0.498305	13	GAGTCACGTGGTA	CAGACACGTGAACA	+
snPVvsRandom10.fwd	EHF_MOUSE.H11MO.0.B	0	0.0155702	5.57414	0.498305	13	GAGTCACGTGGTA	GAACCAGGAAGTGGC	+
snPVvsRandom10.fwd	JUN_MOUSE.H11MO.0.A	3	0.0182388	6.52947	0.515198	7	GAGTCACGTGGTA	GGTGAGTCAC	+
snPVvsRandom10.fwd	FOSB_MOUSE.H11MO.0.A	2	0.0184447	6.60321	0.515198	7	GAGTCACGTGGTA	ATGAGTCAT	+
snPVvsRandom10.fwd	ELF3_MOUSE.H11MO.0.B	0	0.0188237	6.7389	0.515198	13	GAGTCACGTGGTA	GAACCAGGAAGTGG	+
snPVvsRandom10.fwd	MYB_MOUSE.H11MO.0.A	1	0.019025	6.81095	0.515198	11	GAGTCACGTGGTA	GGTGGCAGTTGG	+
snPVvsRandom10.fwd	SMCA5_MOUSE.H11MO.0.C	2	0.0241234	8.63618	0.586605	13	GAGTCACGTGGTA	TGGAATGGAATGGAA	+
snPVvsRandom10.fwd	ETV2_MOUSE.H11MO.0.A	1	0.0241613	8.64976	0.586605	13	GAGTCACGTGGTA	GGAAACAGGAAGTGGG	+
snPVvsRandom10.fwd	CTCF_MOUSE.H11MO.0.A	3	0.0252288	9.0319	0.591188	13	GAGTCACGTGGTA	CCAGCGCCCCCTGGTGGCCA	-
snPVvsRandom10.fwd	NR2E3_MOUSE.H11MO.0.C	1	0.0260294	9.31852	0.591188	13	GAGTCACGTGGTA	AAAGTCAAAAGTCA	+
snPVvsRandom11.fwd	ALX1_MOUSE.H11MO.0.B	1	0.000363828	0.13025	0.140253	11	AAAGCAATTAGAA	TAATTCAATTAT	-
snPVvsRandom11.fwd	BARX1_MOUSE.H11MO.0.C	0	0.000394713	0.141307	0.140253	12	AAAGCAATTAGAA	AAAACAATTAAA	-
snPVvsRandom11.fwd	PROP1_MOUSE.H11MO.0.C	1	0.00128389	0.459633	0.304137	10	AAAGCAATTAGAA	TAATTCAATTA	-
snPVvsRandom11.fwd	DLX3_MOUSE.H11MO.0.C	-2	0.0019866	0.711204	0.35295	10	AAAGCAATTAGAA	TGTAATTATC	-
snPVvsRandom11.fwd	NOBOX_MOUSE.H11MO.0.C	-2	0.00279693	1.0013	0.397533	9	AAAGCAATTAGAA	ACCAATTAG	-
snPVvsRandom11.fwd	EVX2_MOUSE.H11MO.0.A	0	0.00366903	1.31351	0.434572	12	AAAGCAATTAGAA	AAAGCAATAAAA	-
snPVvsRandom11.fwd	CDX2_MOUSE.H11MO.0.A	0	0.00512589	1.83507	0.520395	12	AAAGCAATTAGAA	AAGGCCATAAAA	-
snPVvsRandom11.fwd	DDIT3_MOUSE.H11MO.0.C	2	0.00708426	2.53617	0.526479	8	AAAGCAATTAGAA	ATGATGCAAT	+
snPVvsRandom11.fwd	ZFP42_MOUSE.H11MO.0.A	1	0.00804379	2.87968	0.526479	11	AAAGCAATTAGAA	GGCAGCCATTTT	+
snPVvsRandom11.fwd	FOXM1_MOUSE.H11MO.0.B	2	0.00911623	3.26361	0.526479	10	AAAGCAATTAGAA	GCAAAGCAAACA	-
snPVvsRandom11.fwd	ATF4_MOUSE.H11MO.0.A	4	0.00969943	3.47239	0.526479	8	AAAGCAATTAGAA	GGATGATGCAAT	+
snPVvsRandom11.fwd	FOXI1_MOUSE.H11MO.0.B	-1	0.0103161	3.69318	0.526479	12	AAAGCAATTAGAA	AACCAATCAGAG	-
snPVvsRandom11.fwd	CEBPG_MOUSE.H11MO.0.B	4	0.0103161	3.69318	0.526479	8	AAAGCAATTAGAA	GGATGATGCAAT	+
snPVvsRandom11.fwd	DLX5_MOUSE.H11MO.0.C	1	0.0103716	3.71304	0.526479	10	AAAGCAATTAGAA	ACCTATAATTA	-
snPVvsRandom11.fwd	MEF2A_MOUSE.H11MO.0.A	-2	0.0146728	5.25285	0.650261	11	AAAGCAATTAGAA	TTCTATTTTTAGCA	+
snPVvsRandom11.fwd	MYB_MOUSE.H11MO.0.A	1	0.0157326	5.63227	0.650261	11	AAAGCAATTAGAA	GGTGGCAGTTGG	+
snPVvsRandom11.fwd	MEF2D_MOUSE.H11MO.0.A	-2	0.0164702	5.89632	0.650261	11	AAAGCAATTAGAA	TGCTATTTTTAGCT	+
snPVvsRandom11.fwd	HXB4_MOUSE.H11MO.0.A	-3	0.0207886	7.44233	0.755094	8	AAAGCAATTAGAA	GCCATTAA	-
snPVvsRandom11.fwd	ELF5_MOUSE.H11MO.0.A	4	0.0212505	7.60768	0.755094	13	AAAGCAATTAGAA	GGAAGAAGGAAGAAGAA	+
snPVvsRandom11.fwd	GFI1_MOUSE.H11MO.0.C	0	0.022359	8.00453	0.756651	10	AAAGCAATTAGAA	GCTGTGATTT	+
snPVvsRandom11.fwd	TF2L1_MOUSE.H11MO.0.C	0	0.0252368	9.03479	0.78357	13	AAAGCAATTAGAA	GAACCGGCTTGAACCGGTT	-
snPVvsRandom11.fwd	PRRX2_MOUSE.H11MO.0.C	-4	0.0263733	9.44166	0.78357	7	AAAGCAATTAGAA	CAATTAA	-
snPVvsRandom11.fwd	NKX31_MOUSE.H11MO.0.C	0	0.0264623	9.4735	0.78357	12	AAAGCAATTAGAA	AAAGCACTTAAC	-
snPVvsRandom12.fwd	BACH2_MOUSE.H11MO.0.A	0	2.81162e-08	1.00656e-05	1.93281e-05	11	TGCTGAGTCACAG	TGCTGAGTCAT	+
snPVvsRandom12.fwd	BACH1_MOUSE.H11MO.0.C	0	8.01517e-07	0.000286943	0.000275496	13	TGCTGAGTCACAG	TGCTGAGTCATGGT	+
snPVvsRandom12.fwd	ATF3_MOUSE.H11MO.0.A	-2	2.29951e-06	0.000823224	0.000400242	9	TGCTGAGTCACAG	ATGAGTCAC	+
snPVvsRandom12.fwd	NF2L2_MOUSE.H11MO.0.A	3	2.62391e-06	0.00093936	0.000400242	11	TGCTGAGTCACAG	AATTGCTGAGTCAT	-
snPVvsRandom12.fwd	NFE2_MOUSE.H11MO.0.A	3	2.91112e-06	0.00104218	0.000400242	11	TGCTGAGTCACAG	AACTGCTGAGTCAT	-
snPVvsRandom12.fwd	JUN_MOUSE.H11MO.0.A	-1	3.51058e-06	0.00125679	0.000402217	10	TGCTGAGTCACAG	GGTGAGTCAC	+
snPVvsRandom12.fwd	FOSL2_MOUSE.H11MO.0.A	-1	8.01244e-06	0.00286845	0.000739128	11	TGCTGAGTCACAG	GATGAGTCACC	+
snPVvsRandom12.fwd	JUNB_MOUSE.H11MO.0.A	-2	8.60155e-06	0.00307935	0.000739128	9	TGCTGAGTCACAG	ATGAGTCAC	+
snPVvsRandom12.fwd	FOSB_MOUSE.H11MO.0.A	-2	1.2594e-05	0.00450866	0.000961954	9	TGCTGAGTCACAG	ATGAGTCAT	+
snPVvsRandom12.fwd	FOSL1_MOUSE.H11MO.0.A	0	2.87858e-05	0.0103053	0.00197884	12	TGCTGAGTCACAG	GGATGAGTCACC	+
snPVvsRandom12.fwd	MAFB_MOUSE.H11MO.0.B	0	3.30743e-05	0.0118406	0.00198379	11	TGCTGAGTCACAG	TGCTGACTCAG	+
snPVvsRandom12.fwd	JUND_MOUSE.H11MO.0.A	0	3.63341e-05	0.0130076	0.00198379	11	TGCTGAGTCACAG	GGGTGAGTCAT	+
snPVvsRandom12.fwd	FOS_MOUSE.H11MO.0.A	0	3.75151e-05	0.0134304	0.00198379	12	TGCTGAGTCACAG	GGATGAGTCATC	+
snPVvsRandom12.fwd	MAFK_MOUSE.H11MO.0.A	5	0.000504222	0.180511	0.0216638	13	TGCTGAGTCACAG	AAAACTGCTGAGTCAGCATT	+
snPVvsRandom12.fwd	MAFG_MOUSE.H11MO.0.A	0	0.000715025	0.255979	0.0289138	13	TGCTGAGTCACAG	TGCTGAGTCAGCAATTTT	-
snPVvsRandom12.fwd	MAF_MOUSE.H11MO.0.A	0	0.00109281	0.391225	0.0375618	13	TGCTGAGTCACAG	TGCTGAGTCAGCAAATT	-
snPVvsRandom12.fwd	MAFF_MOUSE.H11MO.0.A	4	0.00134294	0.480772	0.0439613	13	TGCTGAGTCACAG	TTTTTGCTGAGTCAGCATTTTT	-
snPVvsRandom12.fwd	PKNX1_MOUSE.H11MO.0.A	-3	0.00233115	0.834551	0.0622938	10	TGCTGAGTCACAG	TGATTGACAGG	+
snPVvsRandom12.fwd	BATF_MOUSE.H11MO.0.A	-2	0.00244667	0.875909	0.0622938	11	TGCTGAGTCACAG	CTGAGTCATTTCGAAACT	-
snPVvsRandom12.fwd	PBX1_MOUSE.H11MO.0.A	-3	0.00423477	1.51605	0.0939076	10	TGCTGAGTCACAG	TGATTGACAGG	+
snPVvsRandom12.fwd	ZN322_MOUSE.H11MO.0.B	3	0.0175621	6.28722	0.355083	13	TGCTGAGTCACAG	CCAGGCTCTGTACCAGGCTC	-
snPVvsRandom12.fwd	NFAC1_MOUSE.H11MO.0.A	-4	0.018254	6.53494	0.358528	9	TGCTGAGTCACAG	GACTCATATTTTCCA	-
snPVvsRandom12.fwd	OVOL1_MOUSE.H11MO.0.C	-3	0.0268084	9.59741	0.511919	9	TGCTGAGTCACAG	ACAGTTACA	-
snPVvsRandom13.fwd	MITF_MOUSE.H11MO.0.A	-1	7.72531e-06	0.00276566	0.00544266	10	GAGTCACATGACT	AGTCACGTGG	-
snPVvsRandom13.fwd	USF1_MOUSE.H11MO.0.A	0	2.50801e-05	0.00897868	0.00883475	13	GAGTCACATGACT	GGGTCACGTGGCC	+
snPVvsRandom13.fwd	TFE3_MOUSE.H11MO.0.A	-1	8.7852e-05	0.031451	0.0206312	10	GAGTCACATGACT	GGTCACGTGA	+
snPVvsRandom13.fwd	TFEB_MOUSE.H11MO.0.C	-1	0.000126521	0.0452943	0.0222841	9	GAGTCACATGACT	GGTCACGTG	+
snPVvsRandom13.fwd	USF2_MOUSE.H11MO.0.A	0	0.000170269	0.0609564	0.0239917	13	GAGTCACATGACT	GGGTCACGTGGCCGCGGCG	+
snPVvsRandom13.fwd	BHE40_MOUSE.H11MO.0.A	-2	0.00214632	0.768382	0.151213	9	GAGTCACATGACT	GTCACGTGC	-
snPVvsRandom13.fwd	CLOCK_MOUSE.H11MO.0.C	0	0.00237414	0.849943	0.152058	13	GAGTCACATGACT	CAGACACGTGAACA	+
snPVvsRandom13.fwd	RARG_MOUSE.H11MO.0.C	6	0.00352125	1.26061	0.186249	12	GAGTCACATGACT	AGGTCAGAGTGACCTGGG	+
snPVvsRandom13.fwd	BMAL1_MOUSE.H11MO.0.A	-2	0.00440417	1.57669	0.206856	9	GAGTCACATGACT	GTCACGTGG	-
snPVvsRandom13.fwd	JUNB_MOUSE.H11MO.0.A	2	0.00978132	3.50171	0.430698	7	GAGTCACATGACT	ATGAGTCAC	+
snPVvsRandom13.fwd	ARNT_MOUSE.H11MO.0.B	-3	0.0134224	4.80522	0.507964	8	GAGTCACATGACT	TCACGTGC	+
snPVvsRandom13.fwd	ATF3_MOUSE.H11MO.0.A	2	0.0142934	5.11702	0.507964	7	GAGTCACATGACT	ATGAGTCAC	+
snPVvsRandom13.fwd	NFIL3_MOUSE.H11MO.0.C	-2	0.0144201	5.16239	0.507964	11	GAGTCACATGACT	ATTACATAACT	-
snPVvsRandom13.fwd	ATF1_MOUSE.H11MO.0.B	-2	0.0163071	5.83795	0.547083	10	GAGTCACATGACT	CTGACGTCAC	+
snPVvsRandom13.fwd	NR1D2_MOUSE.H11MO.0.A	8	0.017443	6.24459	0.55859	11	GAGTCACATGACT	GGGGAAGTGGGTCAGAGGG	+
snPVvsRandom13.fwd	HLF_MOUSE.H11MO.0.C	-1	0.0191319	6.84922	0.570387	11	GAGTCACATGACT	TGTTGCATAAC	+
snPVvsRandom13.fwd	JUN_MOUSE.H11MO.0.A	3	0.0194306	6.95615	0.570387	7	GAGTCACATGACT	GGTGAGTCAC	+
snPVvsRandom13.fwd	FOSB_MOUSE.H11MO.0.A	2	0.0232066	8.30796	0.630076	7	GAGTCACATGACT	ATGAGTCAT	+
snPVvsRandom13.fwd	TEAD4_MOUSE.H11MO.0.A	0	0.0238028	8.5214	0.630076	13	GAGTCACATGACT	GAATGCCAGGAATGT	-
snPVvsRandom14.fwd	RORA_MOUSE.H11MO.0.C	0	9.06314e-06	0.0032446	0.00643073	13	ATCTGGGTCACAT	AACTAGGTCAGGG	+
snPVvsRandom14.fwd	PPARA_MOUSE.H11MO.0.A	0	5.41031e-05	0.0193689	0.00946754	13	ATCTGGGTCACAT	AACTAGGTCAAAGGTCA	+
snPVvsRandom14.fwd	PPARG_MOUSE.H11MO.0.A	0	5.88454e-05	0.0210667	0.00946754	13	ATCTGGGTCACAT	AAGTGGGGCAAAGGTCA	+
snPVvsRandom14.fwd	RORG_MOUSE.H11MO.0.B	2	6.52089e-05	0.0233448	0.00946754	10	ATCTGGGTCACAT	GAAAGTGGGTCA	+
snPVvsRandom14.fwd	NR1D1_MOUSE.H11MO.0.A	4	6.67153e-05	0.0238841	0.00946754	13	ATCTGGGTCACAT	AGGGAAGTGGGTCAGAAGG	+
snPVvsRandom14.fwd	NR1D2_MOUSE.H11MO.0.A	4	0.000207028	0.0741159	0.0244827	13	ATCTGGGTCACAT	GGGGAAGTGGGTCAGAGGG	+
snPVvsRandom14.fwd	USF1_MOUSE.H11MO.0.A	-4	0.00234697	0.840217	0.237899	9	ATCTGGGTCACAT	GGGTCACGTGGCC	+
snPVvsRandom14.fwd	TWST1_MOUSE.H11MO.0.B	2	0.0035972	1.2878	0.303912	13	ATCTGGGTCACAT	ACATCTGGTTTTAATTA	+
snPVvsRandom14.fwd	ZFP57_MOUSE.H11MO.0.B	-2	0.00385486	1.38004	0.303912	10	ATCTGGGTCACAT	CTGCGGCAAA	+
snPVvsRandom14.fwd	ERR3_MOUSE.H11MO.0.C	-1	0.0043973	1.57423	0.31201	10	ATCTGGGTCACAT	TCAAGGTCAC	+
snPVvsRandom14.fwd	ATF3_MOUSE.H11MO.0.A	-2	0.00655593	2.34702	0.366848	9	ATCTGGGTCACAT	ATGAGTCAC	+
snPVvsRandom14.fwd	MITF_MOUSE.H11MO.0.A	-5	0.00685502	2.4541	0.366848	8	ATCTGGGTCACAT	AGTCACGTGG	-
snPVvsRandom14.fwd	TFEB_MOUSE.H11MO.0.C	-5	0.00703358	2.51802	0.366848	8	ATCTGGGTCACAT	GGTCACGTG	+
snPVvsRandom14.fwd	USF2_MOUSE.H11MO.0.A	-4	0.00752753	2.69486	0.366848	9	ATCTGGGTCACAT	GGGTCACGTGGCCGCGGCG	+
snPVvsRandom14.fwd	TFE3_MOUSE.H11MO.0.A	-5	0.00775525	2.77638	0.366848	8	ATCTGGGTCACAT	GGTCACGTGA	+
snPVvsRandom14.fwd	JUNB_MOUSE.H11MO.0.A	-2	0.010581	3.78801	0.469234	9	ATCTGGGTCACAT	ATGAGTCAC	+
snPVvsRandom14.fwd	BACH2_MOUSE.H11MO.0.A	0	0.0132622	4.74788	0.553541	11	ATCTGGGTCACAT	TGCTGAGTCAT	+
snPVvsRandom14.fwd	FOSB_MOUSE.H11MO.0.A	-2	0.0185475	6.63999	0.731128	9	ATCTGGGTCACAT	ATGAGTCAT	+
snPVvsRandom14.fwd	ESR1_MOUSE.H11MO.0.A	2	0.0206289	7.38515	0.770379	13	ATCTGGGTCACAT	AGGTCAGGGTGACCT	-
snPVvsRandom14.fwd	RXRB_MOUSE.H11MO.0.C	-2	0.0227826	8.15619	0.777997	10	ATCTGGGTCACAT	TGAGGTCACA	+
snPVvsRandom14.fwd	BACH1_MOUSE.H11MO.0.C	0	0.0233079	8.34424	0.777997	13	ATCTGGGTCACAT	TGCTGAGTCATGGT	+
snPVvsRandom14.fwd	JUN_MOUSE.H11MO.0.A	-1	0.0241223	8.63578	0.777997	10	ATCTGGGTCACAT	GGTGAGTCAC	+
snPVvsKNN1.fwd	ERR3_MOUSE.H11MO.0.C	-2	7.13622e-07	0.000255477	0.000497373	10	CTGTGACCTTGAA	GTGACCTTGA	-
snPVvsKNN1.fwd	NR5A2_MOUSE.H11MO.0.A	-3	0.000135247	0.0484184	0.0259757	10	CTGTGACCTTGAA	TGACCTTGAAC	-
snPVvsKNN1.fwd	ERR2_MOUSE.H11MO.0.A	1	0.000174873	0.0626046	0.0259757	13	CTGTGACCTTGAA	AGGATGACCTTGAACTT	-
snPVvsKNN1.fwd	RORA_MOUSE.H11MO.0.C	0	0.000187142	0.066997	0.0259757	13	CTGTGACCTTGAA	CCCTGACCTAGTT	-
snPVvsKNN1.fwd	ERR1_MOUSE.H11MO.0.A	-3	0.000217523	0.0778732	0.0259757	10	CTGTGACCTTGAA	TGACCTTGACCT	-
snPVvsKNN1.fwd	STF1_MOUSE.H11MO.0.B	-3	0.000223617	0.080055	0.0259757	10	CTGTGACCTTGAA	TGGCCTTGAGC	-
snPVvsKNN1.fwd	RARA_MOUSE.H11MO.0.A	-3	0.000325918	0.116679	0.0324507	10	CTGTGACCTTGAA	TGACCTTGAACTTCTGACCC	-
snPVvsKNN1.fwd	NR4A2_MOUSE.H11MO.0.C	-2	0.000515384	0.184507	0.0449009	9	CTGTGACCTTGAA	GTGACCTTT	-
snPVvsKNN1.fwd	RXRG_MOUSE.H11MO.0.B	-3	0.000839767	0.300637	0.0650325	10	CTGTGACCTTGAA	TGACCTTGAACTCCTGACCCTC	-
snPVvsKNN1.fwd	COT1_MOUSE.H11MO.0.B	-3	0.00111734	0.400009	0.0778754	9	CTGTGACCTTGAA	TGACCTTTG	-
snPVvsKNN1.fwd	RXRA_MOUSE.H11MO.0.A	-3	0.00126812	0.453988	0.0803493	10	CTGTGACCTTGAA	TGACCTTGAACTCCTGACCCT	-
snPVvsKNN1.fwd	RXRB_MOUSE.H11MO.0.C	-1	0.00141963	0.508226	0.082453	10	CTGTGACCTTGAA	TGTGACCTCA	-
snPVvsKNN1.fwd	NR1D2_MOUSE.H11MO.0.A	2	0.00179543	0.642763	0.089861	13	CTGTGACCTTGAA	CCCTCTGACCCACTTCCCC	-
snPVvsKNN1.fwd	NKX28_MOUSE.H11MO.0.C	-4	0.00180503	0.646202	0.089861	9	CTGTGACCTTGAA	GTCCTTGAA	-
snPVvsKNN1.fwd	VDR_MOUSE.H11MO.0.A	6	0.00265614	0.950899	0.123417	10	CTGTGACCTTGAA	TGAACCCACTGACCCC	-
snPVvsKNN1.fwd	COT2_MOUSE.H11MO.0.A	0	0.00338376	1.21139	0.147399	13	CTGTGACCTTGAA	CTCTGACCTTTGG	-
snPVvsKNN1.fwd	PPARA_MOUSE.H11MO.0.A	4	0.0039943	1.42996	0.155265	13	CTGTGACCTTGAA	TGACCTTTGACCTAGTT	-
snPVvsKNN1.fwd	RARG_MOUSE.H11MO.0.C	9	0.00400989	1.43554	0.155265	9	CTGTGACCTTGAA	CCCAGGTCACTCTGACCT	-
snPVvsKNN1.fwd	NR1D1_MOUSE.H11MO.0.A	2	0.00615293	2.20275	0.225252	13	CTGTGACCTTGAA	CCTTCTGACCCACTTCCCT	-
snPVvsKNN1.fwd	ESR2_MOUSE.H11MO.0.A	6	0.00646376	2.31403	0.225252	9	CTGTGACCTTGAA	AGGTCACCCTGACCT	+
snPVvsKNN1.fwd	ESR1_MOUSE.H11MO.0.A	6	0.00728466	2.60791	0.23413	9	CTGTGACCTTGAA	AGGTCAGGGTGACCT	-
snPVvsKNN1.fwd	NR1H4_MOUSE.H11MO.0.A	5	0.00739038	2.64576	0.23413	13	CTGTGACCTTGAA	GGGGTCAATGACCCCGAGG	+
snPVvsKNN1.fwd	RORG_MOUSE.H11MO.0.B	-3	0.00944581	3.3816	0.262038	10	CTGTGACCTTGAA	TGACCCACTTTC	-
snPVvsKNN1.fwd	NR2C2_MOUSE.H11MO.0.A	4	0.00952741	3.41081	0.262038	9	CTGTGACCTTGAA	TGACCTTTGACCT	-
snPVvsKNN1.fwd	PPARG_MOUSE.H11MO.0.A	4	0.0105328	3.77074	0.27189	13	CTGTGACCTTGAA	TGACCTTTGCCCCACTT	-
snPVvsKNN1.fwd	PRD14_MOUSE.H11MO.0.A	6	0.0144639	5.17808	0.356818	10	CTGTGACCTTGAA	CAAGGTCTCTAACCCT	-
snPVvsKNN1.fwd	NR4A1_MOUSE.H11MO.0.B	-3	0.0148467	5.31513	0.356818	9	CTGTGACCTTGAA	TGACCTTTT	-
snPVvsKNN1.fwd	GFI1_MOUSE.H11MO.0.C	1	0.0171217	6.12957	0.397777	9	CTGTGACCTTGAA	GCTGTGATTT	+
snPVvsKNN1.fwd	THA_MOUSE.H11MO.0.C	-3	0.0185694	6.64786	0.409786	10	CTGTGACCTTGAA	TGTCCTCAGATGACCTC	-
snPVvsKNN1.fwd	SMAD3_MOUSE.H11MO.0.B	2	0.0188145	6.7356	0.409786	10	CTGTGACCTTGAA	CTCTGTCACCTG	+
snPVvsKNN1.fwd	NR2C1_MOUSE.H11MO.0.C	-2	0.0234097	8.38068	0.486911	11	CTGTGACCTTGAA	CTGACCTCTGGCC	-
snPVvsKNN1.fwd	ANDR_MOUSE.H11MO.0.A	6	0.0250619	8.97215	0.499068	10	CTGTGACCTTGAA	GGAACACTCTGTTCCT	+
snPVvsKNN1.fwd	NR1H3_MOUSE.H11MO.0.A	-2	0.026607	9.52532	0.51512	11	CTGTGACCTTGAA	CTGACCTTTGACCTC	-
snPVvsKNN1.fwd	CDX2_MOUSE.H11MO.0.A	2	0.0275047	9.84667	0.518106	10	CTGTGACCTTGAA	TTTTATGGCCTT	+
snPVvsKNN2.fwd	MEF2C_MOUSE.H11MO.0.A	0	5.40128e-13	1.93366e-10	3.80557e-10	13	TGGCTATTTTTAG	GTTCTATTTTTAGCT	+
snPVvsKNN2.fwd	MEF2D_MOUSE.H11MO.0.A	-1	2.80387e-11	1.00378e-08	9.87758e-09	12	TGGCTATTTTTAG	TGCTATTTTTAGCT	+
snPVvsKNN2.fwd	MEF2A_MOUSE.H11MO.0.A	-1	1.87578e-10	6.71528e-08	4.40538e-08	12	TGGCTATTTTTAG	TTCTATTTTTAGCA	+
snPVvsKNN2.fwd	FOXJ3_MOUSE.H11MO.0.A	1	0.000453766	0.162448	0.0799273	12	TGGCTATTTTTAG	TTGTTTATTTTTT	+
snPVvsKNN2.fwd	CDX1_MOUSE.H11MO.0.C	-5	0.00172245	0.616638	0.204391	8	TGGCTATTTTTAG	ATTTATGT	+
snPVvsKNN2.fwd	TBP_MOUSE.H11MO.0.A	-3	0.00203066	0.726976	0.204391	10	TGGCTATTTTTAG	CCTTTTATAG	-
snPVvsKNN2.fwd	SRF_MOUSE.H11MO.0.A	0	0.00291371	1.04311	0.246378	13	TGGCTATTTTTAG	TTTCCTTATTTGGCCAT	+
snPVvsKNN2.fwd	HNF1A_MOUSE.H11MO.0.A	0	0.00347127	1.24271	0.246378	13	TGGCTATTTTTAG	GGTTAATTATTAACC	-
snPVvsKNN2.fwd	SOX5_MOUSE.H11MO.0.C	-4	0.00349686	1.25188	0.246378	8	TGGCTATTTTTAG	TATTGTTA	+
snPVvsKNN2.fwd	FOXL2_MOUSE.H11MO.0.C	0	0.00385083	1.3786	0.246652	11	TGGCTATTTTTAG	TGTTTACATTT	+
snPVvsKNN2.fwd	FOXJ2_MOUSE.H11MO.0.C	0	0.00429552	1.5378	0.252207	10	TGGCTATTTTTAG	TGTTTATTTA	+
snPVvsKNN2.fwd	SOX2_MOUSE.H11MO.0.A	-2	0.00756363	2.70778	0.339491	11	TGGCTATTTTTAG	TCCTTTGTTATGCAAA	+
snPVvsKNN2.fwd	DLX5_MOUSE.H11MO.0.C	-4	0.00770948	2.76	0.339491	9	TGGCTATTTTTAG	TAATTATAGGT	+
snPVvsKNN2.fwd	RUNX3_MOUSE.H11MO.0.A	-1	0.0105482	3.77625	0.437171	12	TGGCTATTTTTAG	GGCTGTGGTTTG	+
snPVvsKNN2.fwd	FOXO1_MOUSE.H11MO.0.A	-1	0.0127192	4.55348	0.4543	10	TGGCTATTTTTAG	GCCTGTTTAC	+
snPVvsKNN2.fwd	NANOG_MOUSE.H11MO.0.A	-2	0.0130138	4.65892	0.4543	11	TGGCTATTTTTAG	TCCTTTGTTATGCAAAT	+
snPVvsKNN2.fwd	HXA9_MOUSE.H11MO.0.B	-2	0.0140838	5.04201	0.4543	11	TGGCTATTTTTAG	ATGATTTATGG	+
snPVvsKNN2.fwd	EVX1_MOUSE.H11MO.0.C	-3	0.014918	5.34063	0.4543	10	TGGCTATTTTTAG	TGATTTATGGCCT	+
snPVvsKNN2.fwd	CDX4_MOUSE.H11MO.0.A	-3	0.014976	5.3614	0.4543	10	TGGCTATTTTTAG	TGATTTATGGCC	+
snPVvsKNN2.fwd	AIRE_MOUSE.H11MO.0.C	1	0.0153901	5.50966	0.4543	13	TGGCTATTTTTAG	ATTGGTTTTATTGGTTAA	+
snPVvsKNN2.fwd	PO5F1_MOUSE.H11MO.0.A	-3	0.0203467	7.28412	0.573426	10	TGGCTATTTTTAG	CCATTGTTATGCAAAT	+
snPVvsKNN2.fwd	SP7_MOUSE.H11MO.0.A	-4	0.0224269	8.02882	0.590765	9	TGGCTATTTTTAG	TAATTACAGGTTTG	-
snPVvsKNN2.fwd	HNF1B_MOUSE.H11MO.0.A	0	0.0234335	8.38919	0.590765	13	TGGCTATTTTTAG	AGTTAATCATTAACT	-
snPVvsKNN2.fwd	FOXQ1_MOUSE.H11MO.0.C	3	0.0234774	8.4049	0.590765	9	TGGCTATTTTTAG	TATTGTTTATTT	+
snPVvsKNN2.fwd	MEIS1_MOUSE.H11MO.0.A	-2	0.0276335	9.8928	0.671369	11	TGGCTATTTTTAG	ATGATTTATGGC	+
snPVvsKNN3.fwd	LHX6_MOUSE.H11MO.0.C	-2	1.27604e-06	0.000456822	0.000900281	9	TTGTAATCAGGAT	GTAATCAGC	-
snPVvsKNN3.fwd	FOXO3_MOUSE.H11MO.0.B	-1	0.000166143	0.0594792	0.0586093	10	TTGTAATCAGGAT	TGTAAACAGG	-
snPVvsKNN3.fwd	FOXP2_MOUSE.H11MO.0.A	-1	0.000513355	0.183781	0.120729	9	TTGTAATCAGGAT	AGTAAACAA	-
snPVvsKNN3.fwd	DLX3_MOUSE.H11MO.0.C	-1	0.00106556	0.381469	0.163173	10	TTGTAATCAGGAT	TGTAATTATC	-
snPVvsKNN3.fwd	LHX3_MOUSE.H11MO.0.C	-2	0.00115639	0.413987	0.163173	9	TTGTAATCAGGAT	TTAATTAGC	-
snPVvsKNN3.fwd	FOXA2_MOUSE.H11MO.0.A	1	0.00176161	0.630657	0.195306	12	TTGTAATCAGGAT	AAAGTAAACAAGG	-
snPVvsKNN3.fwd	NKX21_MOUSE.H11MO.0.A	-2	0.00231944	0.83036	0.195306	10	TTGTAATCAGGAT	CCACTCAAGA	-
snPVvsKNN3.fwd	FOXO1_MOUSE.H11MO.0.A	-2	0.0024995	0.894823	0.195306	10	TTGTAATCAGGAT	GTAAACAGGC	-
snPVvsKNN3.fwd	HXB7_MOUSE.H11MO.0.C	0	0.0024995	0.894823	0.195306	10	TTGTAATCAGGAT	CATTAATCAA	-
snPVvsKNN3.fwd	PRRX2_MOUSE.H11MO.0.C	-3	0.00276823	0.991027	0.195306	7	TTGTAATCAGGAT	CAATTAA	-
snPVvsKNN3.fwd	PBX3_MOUSE.H11MO.0.A	2	0.0035058	1.25507	0.210892	12	TTGTAATCAGGAT	CCAGCCAATCAGAG	-
snPVvsKNN3.fwd	HXB8_MOUSE.H11MO.0.C	1	0.00358697	1.28413	0.210892	10	TTGTAATCAGGAT	GCATTAATCAA	-
snPVvsKNN3.fwd	HXB4_MOUSE.H11MO.0.A	-2	0.00467708	1.67439	0.241801	8	TTGTAATCAGGAT	GCCATTAA	-
snPVvsKNN3.fwd	NOBOX_MOUSE.H11MO.0.C	-1	0.00479812	1.71773	0.241801	9	TTGTAATCAGGAT	ACCAATTAG	-
snPVvsKNN3.fwd	NKX25_MOUSE.H11MO.0.A	-2	0.00633406	2.26759	0.290511	10	TTGTAATCAGGAT	CCACTCCAGA	-
snPVvsKNN3.fwd	FOXK1_MOUSE.H11MO.0.A	0	0.00658823	2.35858	0.290511	11	TTGTAATCAGGAT	ATGTAAACAAG	-
snPVvsKNN3.fwd	FOXA3_MOUSE.H11MO.0.A	2	0.00740957	2.65263	0.307509	11	TTGTAATCAGGAT	CAAAGTAAACAAG	-
snPVvsKNN3.fwd	ISL1_MOUSE.H11MO.0.A	-2	0.0078633	2.81506	0.30821	9	TTGTAATCAGGAT	TCCATTAGC	-
snPVvsKNN3.fwd	NFYC_MOUSE.H11MO.0.B	2	0.0107241	3.83924	0.39822	12	TTGTAATCAGGAT	TCAGCCAATCAGAA	+
snPVvsKNN3.fwd	NFYA_MOUSE.H11MO.0.A	2	0.012792	4.57952	0.451254	12	TTGTAATCAGGAT	TCAGCCAATCAGAA	+
snPVvsKNN3.fwd	DLX5_MOUSE.H11MO.0.C	2	0.0158934	5.68985	0.533965	9	TTGTAATCAGGAT	ACCTATAATTA	-
snPVvsKNN3.fwd	STAT6_MOUSE.H11MO.0.A	0	0.0170586	6.10696	0.547058	13	TTGTAATCAGGAT	CAGTTCTCAGGAAA	-
snPVvsKNN3.fwd	NFYB_MOUSE.H11MO.0.A	1	0.0201784	7.22388	0.618976	12	TTGTAATCAGGAT	CAGCCAATCAGAG	+
snPVvsKNN4.fwd	LYL1_MOUSE.H11MO.0.A	3	5.09485e-06	0.00182396	0.00358184	11	AAAACAGCTGGAG	CAGGAAACAGCTGG	-
snPVvsKNN4.fwd	OLIG2_MOUSE.H11MO.0.A	7	3.67204e-05	0.0131459	0.0129078	11	AAAACAGCTGGAG	CAGAAGGGAAACAGCTGG	-
snPVvsKNN4.fwd	BHA15_MOUSE.H11MO.0.A	0	7.21166e-05	0.0258177	0.0169	11	AAAACAGCTGGAG	GCAGCAGCTGG	+
snPVvsKNN4.fwd	MYOG_MOUSE.H11MO.0.A	0	9.70287e-05	0.0347363	0.0170535	13	AAAACAGCTGGAG	GGGACAGCTGCGG	-
snPVvsKNN4.fwd	MYF6_MOUSE.H11MO.0.C	-3	0.000174243	0.0623789	0.0189016	7	AAAACAGCTGGAG	GCAGCTG	-
snPVvsKNN4.fwd	PTF1A_MOUSE.H11MO.0.A	7	0.000187629	0.0671713	0.0189016	11	AAAACAGCTGGAG	GGGAAAGGGGGCAGCTGG	-
snPVvsKNN4.fwd	ASCL1_MOUSE.H11MO.0.A	1	0.000188201	0.0673761	0.0189016	13	AAAACAGCTGGAG	GGGGGCAGCTGCAG	-
snPVvsKNN4.fwd	TFE2_MOUSE.H11MO.0.A	-2	0.000365987	0.131023	0.0288498	11	AAAACAGCTGGAG	CACAGCTGCAG	+
snPVvsKNN4.fwd	ASCL2_MOUSE.H11MO.0.C	-2	0.000369327	0.132219	0.0288498	9	AAAACAGCTGGAG	AGCAGCTGG	-
snPVvsKNN4.fwd	ATOH1_MOUSE.H11MO.0.B	-2	0.000444897	0.159273	0.0312776	9	AAAACAGCTGGAG	AGCAGATGG	+
snPVvsKNN4.fwd	MYOD1_MOUSE.H11MO.0.A	4	0.000570709	0.204314	0.036475	11	AAAACAGCTGGAG	GACAGGAACAGCTGC	-
snPVvsKNN4.fwd	HEN1_MOUSE.H11MO.0.C	3	0.00123937	0.443694	0.0670241	13	AAAACAGCTGGAG	TGGGGAGCAGCTGCGTCCCT	+
snPVvsKNN4.fwd	SNAI2_MOUSE.H11MO.0.A	-2	0.00356928	1.2778	0.179237	11	AAAACAGCTGGAG	GGCAGGTGCAT	+
snPVvsKNN4.fwd	ITF2_MOUSE.H11MO.0.B	-3	0.00645695	2.31159	0.302629	9	AAAACAGCTGGAG	CCAGGTGCA	+
snPVvsKNN4.fwd	NGN2_MOUSE.H11MO.0.C	0	0.00831192	2.97567	0.324641	12	AAAACAGCTGGAG	GGAGCAGATGGC	+
snPVvsKNN4.fwd	HTF4_MOUSE.H11MO.0.A	-2	0.00907477	3.24877	0.33118	10	AAAACAGCTGGAG	AGCAGGTGGG	+
snPVvsKNN4.fwd	ZIC3_MOUSE.H11MO.0.A	-1	0.00942149	3.37289	0.33118	12	AAAACAGCTGGAG	TCACAGCAGGGGGCC	-
snPVvsKNN4.fwd	NDF2_MOUSE.H11MO.0.A	-2	0.0110129	3.94263	0.368687	10	AAAACAGCTGGAG	AACAGATGGC	+
snPVvsKNN4.fwd	TGIF1_MOUSE.H11MO.0.A	-1	0.0118969	4.2591	0.380177	9	AAAACAGCTGGAG	TGACAGCTG	+
snPVvsKNN4.fwd	SNAI1_MOUSE.H11MO.0.C	-3	0.0141677	5.07203	0.415013	8	AAAACAGCTGGAG	CCACCTGG	-
snPVvsKNN4.fwd	MAFK_MOUSE.H11MO.0.A	0	0.015371	5.50281	0.43225	13	AAAACAGCTGGAG	AAAACTGCTGAGTCAGCATT	+
snPVvsKNN4.fwd	ZFP42_MOUSE.H11MO.0.A	0	0.0181992	6.51533	0.456951	12	AAAACAGCTGGAG	AAAATGGCTGCC	-
snPVvsKNN4.fwd	MYB_MOUSE.H11MO.0.A	1	0.0181992	6.51533	0.456951	11	AAAACAGCTGGAG	GGTGGCAGTTGG	+
snPVvsKNN4.fwd	TWST1_MOUSE.H11MO.0.B	6	0.0212342	7.60183	0.497609	11	AAAACAGCTGGAG	TAATTAAAACCAGATGT	-
snPVvsKNN4.fwd	TF2L1_MOUSE.H11MO.0.C	0	0.0235515	8.43143	0.511623	13	AAAACAGCTGGAG	GAACCGGCTTGAACCGGTT	-
snPVvsKNN4.fwd	MAFG_MOUSE.H11MO.0.A	0	0.0237983	8.5198	0.511623	13	AAAACAGCTGGAG	AAAATTGCTGACTCAGCA	+
snPVvsKNN4.fwd	ZIC2_MOUSE.H11MO.0.C	-1	0.0253189	9.06417	0.523528	12	AAAACAGCTGGAG	TCTCAGCAGGGGGCC	-
snPVvsKNN4.fwd	MAFF_MOUSE.H11MO.0.A	0	0.027194	9.73547	0.533334	13	AAAACAGCTGGAG	AAAAATGCTGACTCAGCAAAAA	+
snPVvsKNN4.fwd	NDF1_MOUSE.H11MO.0.A	-2	0.0273104	9.77712	0.533334	10	AAAACAGCTGGAG	GACAGATGGT	+
snPVvsKNN5.fwd	MAFK_MOUSE.H11MO.0.A	7	0.00220106	0.787981	1	13	ACACTGCAGCTCC	AATGCTGACTCAGCAGTTTT	-
snPVvsKNN5.fwd	MAFG_MOUSE.H11MO.0.A	5	0.00555429	1.98844	1	13	ACACTGCAGCTCC	TGCTGAGTCAGCAATTTT	-
snPVvsKNN5.fwd	ASCL1_MOUSE.H11MO.0.A	-3	0.00601048	2.15175	1	10	ACACTGCAGCTCC	CTGCAGCTGCCCCC	+
snPVvsKNN5.fwd	TFE2_MOUSE.H11MO.0.A	-3	0.00832081	2.97885	1	10	ACACTGCAGCTCC	CTGCAGCTGTG	-
snPVvsKNN5.fwd	MAF_MOUSE.H11MO.0.A	5	0.0104211	3.73076	1	12	ACACTGCAGCTCC	TGCTGAGTCAGCAAATT	-
snPVvsKNN5.fwd	MYOG_MOUSE.H11MO.0.A	-3	0.0114049	4.08297	1	10	ACACTGCAGCTCC	CCGCAGCTGTCCC	+
snPVvsKNN5.fwd	NFE2_MOUSE.H11MO.0.A	3	0.0168463	6.03097	1	11	ACACTGCAGCTCC	ATGACTCAGCAGTT	+
snPVvsKNN5.fwd	ZKSC1_MOUSE.H11MO.0.A	3	0.017598	6.30008	1	13	ACACTGCAGCTCC	GGCACACAGTAGGTCCTCA	-
snPVvsKNN5.fwd	PRDM9_MOUSE.H11MO.0.C	4	0.0186515	6.67725	1	13	ACACTGCAGCTCC	AAGATGGCAGCAGCATCTG	+
snPVvsKNN5.fwd	MAFF_MOUSE.H11MO.0.A	9	0.0203705	7.29264	1	13	ACACTGCAGCTCC	TTTTTGCTGAGTCAGCATTTTT	-
snPVvsKNN5.fwd	TGIF1_MOUSE.H11MO.0.A	0	0.0266108	9.52668	1	9	ACACTGCAGCTCC	TGACAGCTG	+
snPVvsKNN6.fwd	MAFG_MOUSE.H11MO.0.A	3	1.60747e-09	5.75476e-07	1.12111e-06	13	TGAGTCAGCAGTT	TGCTGAGTCAGCAATTTT	-
snPVvsKNN6.fwd	NFE2_MOUSE.H11MO.0.A	1	3.96244e-09	1.41856e-06	1.38178e-06	13	TGAGTCAGCAGTT	ATGACTCAGCAGTT	+
snPVvsKNN6.fwd	MAFK_MOUSE.H11MO.0.A	5	7.96052e-09	2.84987e-06	1.85065e-06	13	TGAGTCAGCAGTT	AATGCTGACTCAGCAGTTTT	-
snPVvsKNN6.fwd	NF2L2_MOUSE.H11MO.0.A	1	2.5863e-08	9.25896e-06	4.50945e-06	13	TGAGTCAGCAGTT	ATGACTCAGCAATT	+
snPVvsKNN6.fwd	MAF_MOUSE.H11MO.0.A	3	1.17923e-07	4.22164e-05	1.64487e-05	13	TGAGTCAGCAGTT	TGCTGAGTCAGCAAATT	-
snPVvsKNN6.fwd	MAFF_MOUSE.H11MO.0.A	7	8.72823e-07	0.000312471	9.80975e-05	13	TGAGTCAGCAGTT	TTTTTGCTGAGTCAGCATTTTT	-
snPVvsKNN6.fwd	MAFB_MOUSE.H11MO.0.B	1	5.25335e-06	0.0018807	0.000457984	10	TGAGTCAGCAGTT	CTGAGTCAGCA	-
snPVvsKNN6.fwd	BACH2_MOUSE.H11MO.0.A	1	2.12593e-05	0.00761084	0.00164745	10	TGAGTCAGCAGTT	ATGACTCAGCA	-
snPVvsKNN6.fwd	BACH1_MOUSE.H11MO.0.C	4	0.000128075	0.0458508	0.00893239	10	TGAGTCAGCAGTT	ACCATGACTCAGCA	-
snPVvsKNN6.fwd	RARA_MOUSE.H11MO.0.A	-1	0.00379699	1.35932	0.189154	12	TGAGTCAGCAGTT	GGGTCAGAAGTTCAAGGTCA	+
snPVvsKNN6.fwd	FOSL2_MOUSE.H11MO.0.A	2	0.00425088	1.52181	0.197648	9	TGAGTCAGCAGTT	GATGAGTCACC	+
snPVvsKNN6.fwd	JUN_MOUSE.H11MO.0.A	1	0.00524023	1.876	0.22842	9	TGAGTCAGCAGTT	GTGACTCACC	-
snPVvsKNN6.fwd	RXRA_MOUSE.H11MO.0.A	0	0.00691257	2.4747	0.281206	13	TGAGTCAGCAGTT	AGGGTCAGGAGTTCAAGGTCA	+
snPVvsKNN6.fwd	RXRG_MOUSE.H11MO.0.B	1	0.00755101	2.70326	0.281206	13	TGAGTCAGCAGTT	GAGGGTCAGGAGTTCAAGGTCA	+
snPVvsKNN6.fwd	FOXA1_MOUSE.H11MO.0.A	0	0.00784599	2.80887	0.281206	10	TGAGTCAGCAGTT	TATGTAAACA	-
snPVvsKNN6.fwd	ZIC2_MOUSE.H11MO.0.C	-2	0.0103504	3.70543	0.320948	11	TGAGTCAGCAGTT	TCTCAGCAGGGGGCC	-
snPVvsKNN6.fwd	FOXP2_MOUSE.H11MO.0.A	-2	0.0112064	4.0119	0.320948	9	TGAGTCAGCAGTT	AGTAAACAA	-
snPVvsKNN6.fwd	FOSL1_MOUSE.H11MO.0.A	3	0.0116905	4.18521	0.320948	9	TGAGTCAGCAGTT	GGATGAGTCACC	+
snPVvsKNN6.fwd	FOS_MOUSE.H11MO.0.A	3	0.0116905	4.18521	0.320948	9	TGAGTCAGCAGTT	GGATGAGTCATC	+
snPVvsKNN6.fwd	ATF3_MOUSE.H11MO.0.A	1	0.0119647	4.28338	0.320948	8	TGAGTCAGCAGTT	ATGAGTCAC	+
snPVvsKNN6.fwd	FOSB_MOUSE.H11MO.0.A	1	0.0164563	5.89135	0.39772	8	TGAGTCAGCAGTT	ATGAGTCAT	+
snPVvsKNN6.fwd	NR1I3_MOUSE.H11MO.0.C	0	0.0171804	6.15057	0.399407	13	TGAGTCAGCAGTT	GGGGTCAGGAAAGTTCAG	+
snPVvsKNN6.fwd	JUND_MOUSE.H11MO.0.A	1	0.0188138	6.73533	0.416103	10	TGAGTCAGCAGTT	ATGACTCACCC	-
snPVvsKNN6.fwd	SIX4_MOUSE.H11MO.0.C	0	0.0206272	7.38453	0.416103	13	TGAGTCAGCAGTT	GGTCTCAGGTTTCA	-
snPVvsKNN6.fwd	TBX20_MOUSE.H11MO.0.C	1	0.0206272	7.38453	0.416103	13	TGAGTCAGCAGTT	ACCTGTCAGCACCT	-
snPVvsKNN6.fwd	HEN1_MOUSE.H11MO.0.C	2	0.0213042	7.62691	0.416103	13	TGAGTCAGCAGTT	AGGGACGCAGCTGCTCCCCA	-
snPVvsKNN6.fwd	NFAC1_MOUSE.H11MO.0.A	-1	0.0213478	7.64251	0.416103	12	TGAGTCAGCAGTT	GACTCATATTTTCCA	-
snPVvsKNN6.fwd	PRDM9_MOUSE.H11MO.0.C	2	0.0214783	7.68923	0.416103	13	TGAGTCAGCAGTT	AAGATGGCAGCAGCATCTG	+
snPVvsKNN7.fwd	DLX3_MOUSE.H11MO.0.C	-2	4.46291e-05	0.0159772	0.031171	10	ACTCTAATTACAT	GATAATTACA	+
snPVvsKNN7.fwd	DLX5_MOUSE.H11MO.0.C	-4	0.00106862	0.382565	0.298137	9	ACTCTAATTACAT	TAATTATAGGT	+
snPVvsKNN7.fwd	ALX1_MOUSE.H11MO.0.B	-3	0.00178858	0.64031	0.298137	10	ACTCTAATTACAT	ATAATTGGATTA	+
snPVvsKNN7.fwd	BARX1_MOUSE.H11MO.0.C	-2	0.00222745	0.797429	0.298137	11	ACTCTAATTACAT	TTTAATTGTTTT	+
snPVvsKNN7.fwd	PRRX2_MOUSE.H11MO.0.C	-3	0.00276272	0.989053	0.298137	7	ACTCTAATTACAT	TTAATTG	+
snPVvsKNN7.fwd	SP7_MOUSE.H11MO.0.A	-4	0.00288977	1.03454	0.298137	9	ACTCTAATTACAT	TAATTACAGGTTTG	-
snPVvsKNN7.fwd	SIX2_MOUSE.H11MO.0.A	2	0.00435752	1.55999	0.338165	12	ACTCTAATTACAT	GGTATCAGGTTTCA	-
snPVvsKNN7.fwd	PROP1_MOUSE.H11MO.0.C	-4	0.00547942	1.96163	0.382707	9	ACTCTAATTACAT	TAATTGAATTA	+
snPVvsKNN7.fwd	MYB_MOUSE.H11MO.0.A	-3	0.00772524	2.76564	0.485637	10	ACTCTAATTACAT	CCAACTGCCACC	-
snPVvsKNN7.fwd	LHX3_MOUSE.H11MO.0.C	-2	0.00981153	3.51253	0.485637	9	ACTCTAATTACAT	GCTAATTAA	+
snPVvsKNN7.fwd	HXB4_MOUSE.H11MO.0.A	-3	0.00992159	3.55193	0.485637	8	ACTCTAATTACAT	TTAATGGC	+
snPVvsKNN7.fwd	VSX2_MOUSE.H11MO.0.C	1	0.0113581	4.06618	0.485637	11	ACTCTAATTACAT	GAAGCTAATTAA	-
snPVvsKNN7.fwd	MEF2D_MOUSE.H11MO.0.A	1	0.0122453	4.3838	0.485637	13	ACTCTAATTACAT	AGCTAAAAATAGCA	-
snPVvsKNN7.fwd	LHX2_MOUSE.H11MO.0.A	-2	0.0139062	4.97843	0.485637	10	ACTCTAATTACAT	ACTAATTAAC	-
snPVvsKNN7.fwd	MEF2A_MOUSE.H11MO.0.A	1	0.0156256	5.59397	0.496074	13	ACTCTAATTACAT	TTCTATTTTTAGCA	+
snPVvsKNN7.fwd	NFAC4_MOUSE.H11MO.0.C	0	0.0168494	6.03208	0.503848	10	ACTCTAATTACAT	AGGAAAATTT	+
snPVvsKNN7.fwd	DDIT3_MOUSE.H11MO.0.C	-6	0.0179494	6.42589	0.503848	7	ACTCTAATTACAT	ATTGCATCAT	-
snPVvsKNN7.fwd	LHX6_MOUSE.H11MO.0.C	-2	0.0180346	6.45639	0.503848	9	ACTCTAATTACAT	GCTGATTAC	+
snPVvsKNN7.fwd	NOBOX_MOUSE.H11MO.0.C	-3	0.0233689	8.36607	0.545886	9	ACTCTAATTACAT	CTAATTGGT	+
snPVvsKNN7.fwd	FOXL2_MOUSE.H11MO.0.C	-4	0.0239233	8.56455	0.545886	9	ACTCTAATTACAT	TGTTTACATTT	+
snPVvsKNN7.fwd	THA11_MOUSE.H11MO.0.B	2	0.0253093	9.06072	0.545886	13	ACTCTAATTACAT	GAACTACAACTCCCAGCATGCC	-
snPVvsKNN7.fwd	NKX31_MOUSE.H11MO.0.C	-2	0.0264164	9.45708	0.545886	11	ACTCTAATTACAT	GTTAAGTGCTTT	+
snPVvsKNN7.fwd	SIX4_MOUSE.H11MO.0.C	2	0.026472	9.47698	0.545886	12	ACTCTAATTACAT	GGTCTCAGGTTTCA	-
snPVvsKNN7.fwd	ZN143_MOUSE.H11MO.0.A	2	0.0268307	9.60541	0.545886	13	ACTCTAATTACAT	GGACTACAATTCCCAGCATGCC	-
snPVvsKNN7.fwd	MEF2C_MOUSE.H11MO.0.A	2	0.0276393	9.89487	0.545886	13	ACTCTAATTACAT	GTTCTATTTTTAGCT	+
snPVvsKNN8.fwd	MEF2A_MOUSE.H11MO.0.A	2	3.25924e-05	0.0116681	0.0122228	12	CTATATTTAGAAT	TTCTATTTTTAGCA	+
snPVvsKNN8.fwd	MEF2C_MOUSE.H11MO.0.A	3	4.26618e-05	0.0152729	0.0122228	12	CTATATTTAGAAT	GTTCTATTTTTAGCT	+
snPVvsKNN8.fwd	MEF2D_MOUSE.H11MO.0.A	2	5.15324e-05	0.0184486	0.0122228	12	CTATATTTAGAAT	TGCTATTTTTAGCT	+
snPVvsKNN8.fwd	FOXD3_MOUSE.H11MO.0.C	3	0.00206113	0.737884	0.209516	12	CTATATTTAGAAT	TTTGTTTACTTAGCA	+
snPVvsKNN8.fwd	SRF_MOUSE.H11MO.0.A	3	0.00264759	0.947837	0.235489	13	CTATATTTAGAAT	TTTCCTTATTTGGCCAT	+
snPVvsKNN8.fwd	TBP_MOUSE.H11MO.0.A	0	0.0068868	2.46548	0.450155	10	CTATATTTAGAAT	CCTTTTATAG	-
snPVvsKNN8.fwd	FOXJ2_MOUSE.H11MO.0.C	1	0.00736475	2.63658	0.450155	9	CTATATTTAGAAT	TGTTTATTTA	+
snPVvsKNN8.fwd	VSX2_MOUSE.H11MO.0.C	-2	0.0075916	2.71779	0.450155	11	CTATATTTAGAAT	TTAATTAGCTTC	+
snPVvsKNN8.fwd	ALX1_MOUSE.H11MO.0.B	-2	0.0249999	8.94997	0.993796	11	CTATATTTAGAAT	ATAATTGGATTA	+
snPVvsKNN8.fwd	DLX5_MOUSE.H11MO.0.C	2	0.026127	9.35348	0.993796	9	CTATATTTAGAAT	ACCTATAATTA	-
snPVvsKNN8.fwd	FOXC1_MOUSE.H11MO.0.C	0	0.027475	9.83605	0.993796	13	CTATATTTAGAAT	CTTAAGTAAACAATG	-
snPVvsKNN9.fwd	MITF_MOUSE.H11MO.0.A	-1	2.07055e-06	0.000741257	0.00145251	10	GAGTCACGTGGCT	AGTCACGTGG	-
snPVvsKNN9.fwd	TFEB_MOUSE.H11MO.0.C	-1	1.17993e-05	0.00422414	0.00413864	9	GAGTCACGTGGCT	GGTCACGTG	+
snPVvsKNN9.fwd	BMAL1_MOUSE.H11MO.0.A	-2	5.10513e-05	0.0182764	0.0118365	9	GAGTCACGTGGCT	GTCACGTGG	-
snPVvsKNN9.fwd	USF1_MOUSE.H11MO.0.A	0	6.97887e-05	0.0249844	0.0118365	13	GAGTCACGTGGCT	GGGTCACGTGGCC	+
snPVvsKNN9.fwd	TFE3_MOUSE.H11MO.0.A	-1	0.000101238	0.0362432	0.0118365	10	GAGTCACGTGGCT	GGTCACGTGA	+
snPVvsKNN9.fwd	BHE40_MOUSE.H11MO.0.A	-2	0.000145254	0.0520009	0.0145567	9	GAGTCACGTGGCT	GTCACGTGC	-
snPVvsKNN9.fwd	USF2_MOUSE.H11MO.0.A	0	0.000374991	0.134247	0.0292288	13	GAGTCACGTGGCT	GGGTCACGTGGCCGCGGCG	+
snPVvsKNN9.fwd	ARNT_MOUSE.H11MO.0.B	-3	0.000969311	0.347013	0.0613059	8	GAGTCACGTGGCT	TCACGTGC	+
snPVvsKNN9.fwd	MYCN_MOUSE.H11MO.0.A	-3	0.00152383	0.54553	0.0822289	8	GAGTCACGTGGCT	CCACGTGG	-
snPVvsKNN9.fwd	MAX_MOUSE.H11MO.0.A	-1	0.00371129	1.32864	0.166237	11	GAGTCACGTGGCT	GAGCACGTGGC	+
snPVvsKNN9.fwd	EPAS1_MOUSE.H11MO.0.C	-2	0.00472377	1.69111	0.184098	9	GAGTCACGTGGCT	GGCACGTAC	-
snPVvsKNN9.fwd	CLOCK_MOUSE.H11MO.0.C	0	0.00771528	2.76207	0.271451	13	GAGTCACGTGGCT	TGTTCACGTGTCTG	-
snPVvsKNN9.fwd	JUNB_MOUSE.H11MO.0.A	2	0.00773907	2.77059	0.271451	7	GAGTCACGTGGCT	ATGAGTCAC	+
snPVvsKNN9.fwd	AHR_MOUSE.H11MO.0.B	-2	0.00948903	3.39707	0.302574	9	GAGTCACGTGGCT	GTTGCGTGC	+
snPVvsKNN9.fwd	SNAI2_MOUSE.H11MO.0.A	-2	0.0104725	3.74917	0.304342	11	GAGTCACGTGGCT	GGCAGGTGCAT	+
snPVvsKNN9.fwd	ATF3_MOUSE.H11MO.0.A	2	0.010846	3.88287	0.304342	7	GAGTCACGTGGCT	ATGAGTCAC	+
snPVvsKNN9.fwd	MYC_MOUSE.H11MO.0.A	-1	0.0114727	4.10723	0.309546	12	GAGTCACGTGGCT	CGCCACGTGCGC	+
snPVvsKNN9.fwd	JUN_MOUSE.H11MO.0.A	3	0.0155398	5.56327	0.389333	7	GAGTCACGTGGCT	GGTGAGTCAC	+
snPVvsKNN9.fwd	MXI1_MOUSE.H11MO.0.A	4	0.0179596	6.42953	0.434441	11	GAGTCACGTGGCT	CCCGCCGCCACGTGC	-
snPVvsKNN9.fwd	FOSB_MOUSE.H11MO.0.A	2	0.0193862	6.94025	0.438695	7	GAGTCACGTGGCT	ATGAGTCAT	+
snPVvsKNN9.fwd	NKX31_MOUSE.H11MO.0.C	-2	0.0229202	8.20543	0.502459	11	GAGTCACGTGGCT	GTTAAGTGCTTT	+
snPVvsKNN9.fwd	NF2L1_MOUSE.H11MO.0.C	-1	0.0264017	9.4518	0.561242	7	GAGTCACGTGGCT	AGTCATT	+
snPVvsKNN10.fwd	NFE2_MOUSE.H11MO.0.A	2	0.000508693	0.182112	0.130283	12	GCCTCATCAGAAA	ATGACTCAGCAGTT	+
snPVvsKNN10.fwd	NF2L2_MOUSE.H11MO.0.A	2	0.000590378	0.211355	0.130283	12	GCCTCATCAGAAA	ATGACTCAGCAATT	+
snPVvsKNN10.fwd	MAFF_MOUSE.H11MO.0.A	9	0.000711578	0.254745	0.130283	13	GCCTCATCAGAAA	AAAAATGCTGACTCAGCAAAAA	+
snPVvsKNN10.fwd	MAFK_MOUSE.H11MO.0.A	6	0.000736462	0.263654	0.130283	13	GCCTCATCAGAAA	AATGCTGACTCAGCAGTTTT	-
snPVvsKNN10.fwd	FOXI1_MOUSE.H11MO.0.B	0	0.0019604	0.701824	0.277442	12	GCCTCATCAGAAA	AACCAATCAGAG	-
snPVvsKNN10.fwd	NKX22_MOUSE.H11MO.0.A	1	0.00380644	1.3627	0.408255	10	GCCTCATCAGAAA	AGCCACTCCAG	-
snPVvsKNN10.fwd	BACH2_MOUSE.H11MO.0.A	2	0.00465048	1.66487	0.408255	9	GCCTCATCAGAAA	ATGACTCAGCA	-
snPVvsKNN10.fwd	NFYA_MOUSE.H11MO.0.A	2	0.00489319	1.75176	0.408255	12	GCCTCATCAGAAA	TCAGCCAATCAGAA	+
snPVvsKNN10.fwd	NFYC_MOUSE.H11MO.0.B	2	0.00627526	2.24654	0.408255	12	GCCTCATCAGAAA	TCAGCCAATCAGAA	+
snPVvsKNN10.fwd	SRF_MOUSE.H11MO.0.A	3	0.00633444	2.26773	0.408255	13	GCCTCATCAGAAA	ATGGCCAAATAAGGAAA	-
snPVvsKNN10.fwd	MAFG_MOUSE.H11MO.0.A	4	0.00634641	2.27201	0.408255	13	GCCTCATCAGAAA	TGCTGAGTCAGCAATTTT	-
snPVvsKNN10.fwd	PIT1_MOUSE.H11MO.0.C	-2	0.00716818	2.56621	0.422692	11	GCCTCATCAGAAA	CTCATGAATATAT	+
snPVvsKNN10.fwd	FOSL2_MOUSE.H11MO.0.A	3	0.0077967	2.79122	0.424389	8	GCCTCATCAGAAA	GGTGACTCATC	-
snPVvsKNN10.fwd	BATF3_MOUSE.H11MO.0.A	0	0.0102777	3.67941	0.519265	13	GCCTCATCAGAAA	GAGTCATAATGAAACTG	-
snPVvsKNN10.fwd	JUN_MOUSE.H11MO.0.A	2	0.0114073	4.08382	0.519265	8	GCCTCATCAGAAA	GTGACTCACC	-
snPVvsKNN10.fwd	NFYB_MOUSE.H11MO.0.A	1	0.0122755	4.39462	0.519265	12	GCCTCATCAGAAA	CAGCCAATCAGAG	+
snPVvsKNN10.fwd	JUND_MOUSE.H11MO.0.A	2	0.0135106	4.8368	0.519265	9	GCCTCATCAGAAA	ATGACTCACCC	-
snPVvsKNN10.fwd	HXB4_MOUSE.H11MO.0.A	-2	0.0135302	4.84383	0.519265	8	GCCTCATCAGAAA	GCCATTAA	-
snPVvsKNN10.fwd	FOS_MOUSE.H11MO.0.A	3	0.0149201	5.34138	0.519265	9	GCCTCATCAGAAA	GATGACTCATCC	-
snPVvsKNN10.fwd	PO3F1_MOUSE.H11MO.0.C	-2	0.0151288	5.41611	0.519265	11	GCCTCATCAGAAA	CTCATGAATATTCAAG	+
snPVvsKNN10.fwd	FOSL1_MOUSE.H11MO.0.A	3	0.0158047	5.65807	0.519265	9	GCCTCATCAGAAA	GGTGACTCATCC	-
snPVvsKNN10.fwd	BACH1_MOUSE.H11MO.0.C	5	0.0161441	5.7796	0.519265	9	GCCTCATCAGAAA	ACCATGACTCAGCA	-
snPVvsKNN10.fwd	MAF_MOUSE.H11MO.0.A	4	0.0204589	7.32428	0.629434	13	GCCTCATCAGAAA	TGCTGAGTCAGCAAATT	-
snPVvsKNN10.fwd	MAFB_MOUSE.H11MO.0.B	2	0.0240849	8.62241	0.683606	9	GCCTCATCAGAAA	CTGAGTCAGCA	-
snPVvsKNN10.fwd	JUNB_MOUSE.H11MO.0.A	2	0.0244173	8.74139	0.683606	7	GCCTCATCAGAAA	GTGACTCAT	-
snPVvsKNN10.fwd	PBX3_MOUSE.H11MO.0.A	2	0.0265142	9.49207	0.683606	12	GCCTCATCAGAAA	CCAGCCAATCAGAG	-
snPVvsKNN10.fwd	LHX6_MOUSE.H11MO.0.C	-2	0.0274977	9.84416	0.683606	9	GCCTCATCAGAAA	GTAATCAGC	-
snPVvsKNN10.fwd	DDIT3_MOUSE.H11MO.0.C	0	0.0277563	9.93676	0.683606	10	GCCTCATCAGAAA	ATTGCATCAT	-
snPVvsKNN11.fwd	PO3F2_MOUSE.H11MO.0.A	3	0.000552978	0.197966	0.125065	13	CAGCATCAGCATA	CTCATGCATATGCATA	+
snPVvsKNN11.fwd	MAFG_MOUSE.H11MO.0.A	2	0.00064844	0.232142	0.125065	13	CAGCATCAGCATA	TGCTGAGTCAGCAATTTT	-
snPVvsKNN11.fwd	MAF_MOUSE.H11MO.0.A	2	0.000652511	0.233599	0.125065	13	CAGCATCAGCATA	TGCTGAGTCAGCAAATT	-
snPVvsKNN11.fwd	MAFB_MOUSE.H11MO.0.B	0	0.000797343	0.285449	0.125065	11	CAGCATCAGCATA	CTGAGTCAGCA	-
snPVvsKNN11.fwd	MAFK_MOUSE.H11MO.0.A	7	0.000883802	0.316401	0.125065	13	CAGCATCAGCATA	AAAACTGCTGAGTCAGCATT	+
snPVvsKNN11.fwd	MAFF_MOUSE.H11MO.0.A	7	0.00123657	0.442692	0.14582	13	CAGCATCAGCATA	AAAAATGCTGACTCAGCAAAAA	+
snPVvsKNN11.fwd	CEBPG_MOUSE.H11MO.0.B	1	0.00250084	0.895302	0.22118	11	CAGCATCAGCATA	ATTGCATCATCC	-
snPVvsKNN11.fwd	NF2L2_MOUSE.H11MO.0.A	0	0.00315084	1.128	0.234985	13	CAGCATCAGCATA	ATGACTCAGCAATT	+
snPVvsKNN11.fwd	DDIT3_MOUSE.H11MO.0.C	1	0.00387274	1.38644	0.234985	9	CAGCATCAGCATA	ATTGCATCAT	-
snPVvsKNN11.fwd	ATF4_MOUSE.H11MO.0.A	1	0.0039854	1.42677	0.234985	11	CAGCATCAGCATA	ATTGCATCATCC	-
snPVvsKNN11.fwd	BACH2_MOUSE.H11MO.0.A	0	0.00609476	2.18192	0.331713	11	CAGCATCAGCATA	ATGACTCAGCA	-
snPVvsKNN11.fwd	NFE2_MOUSE.H11MO.0.A	0	0.00671523	2.40405	0.339377	13	CAGCATCAGCATA	ATGACTCAGCAGTT	+
snPVvsKNN11.fwd	PO2F2_MOUSE.H11MO.0.B	-3	0.00736414	2.63636	0.347361	10	CAGCATCAGCATA	CATTTGCATAT	-
snPVvsKNN11.fwd	PO3F1_MOUSE.H11MO.0.C	3	0.00859648	3.07754	0.380146	13	CAGCATCAGCATA	CTCATGAATATTCAAG	+
snPVvsKNN11.fwd	NANOG_MOUSE.H11MO.0.A	2	0.0111727	3.99984	0.439174	13	CAGCATCAGCATA	ATTTGCATAACAAAGGA	-
snPVvsKNN11.fwd	PO5F1_MOUSE.H11MO.0.A	2	0.0172892	6.18953	0.627058	13	CAGCATCAGCATA	ATTTGCATAACAATGG	-
snPVvsKNN11.fwd	FOXJ3_MOUSE.H11MO.0.A	1	0.0214161	7.66695	0.688758	12	CAGCATCAGCATA	AAAAAATAAACAA	-
snPVvsKNN11.fwd	SOX2_MOUSE.H11MO.0.A	1	0.0228107	8.16623	0.701715	13	CAGCATCAGCATA	TTTGCATAACAAAGGA	-
snPVvsKNN12.fwd	BACH2_MOUSE.H11MO.0.A	-2	1.88875e-07	6.76173e-05	0.00013003	11	CTGTGACTCAGCA	ATGACTCAGCA	-
snPVvsKNN12.fwd	BACH1_MOUSE.H11MO.0.C	1	1.23379e-06	0.000441698	0.000424697	13	CTGTGACTCAGCA	ACCATGACTCAGCA	-
snPVvsKNN12.fwd	NF2L2_MOUSE.H11MO.0.A	-2	4.82712e-06	0.00172811	0.000782586	11	CTGTGACTCAGCA	ATGACTCAGCAATT	+
snPVvsKNN12.fwd	NFE2_MOUSE.H11MO.0.A	-2	5.33574e-06	0.00191019	0.000782586	11	CTGTGACTCAGCA	ATGACTCAGCAGTT	+
snPVvsKNN12.fwd	JUN_MOUSE.H11MO.0.A	-2	5.86252e-06	0.00209878	0.000782586	10	CTGTGACTCAGCA	GTGACTCACC	-
snPVvsKNN12.fwd	ATF3_MOUSE.H11MO.0.A	-2	6.82049e-06	0.00244174	0.000782586	9	CTGTGACTCAGCA	GTGACTCAT	-
snPVvsKNN12.fwd	JUNB_MOUSE.H11MO.0.A	-2	1.12387e-05	0.00402346	0.00109142	9	CTGTGACTCAGCA	GTGACTCAT	-
snPVvsKNN12.fwd	FOSL2_MOUSE.H11MO.0.A	-1	1.26828e-05	0.00454044	0.00109142	11	CTGTGACTCAGCA	GGTGACTCATC	-
snPVvsKNN12.fwd	FOS_MOUSE.H11MO.0.A	-1	1.61824e-05	0.00579329	0.00122258	12	CTGTGACTCAGCA	GATGACTCATCC	-
snPVvsKNN12.fwd	FOSL1_MOUSE.H11MO.0.A	-1	1.77586e-05	0.00635757	0.00122258	12	CTGTGACTCAGCA	GGTGACTCATCC	-
snPVvsKNN12.fwd	FOSB_MOUSE.H11MO.0.A	-2	1.98887e-05	0.00712017	0.00124475	9	CTGTGACTCAGCA	ATGACTCAT	-
snPVvsKNN12.fwd	JUND_MOUSE.H11MO.0.A	-2	2.82357e-05	0.0101084	0.00161989	11	CTGTGACTCAGCA	ATGACTCACCC	-
snPVvsKNN12.fwd	MAFB_MOUSE.H11MO.0.B	-2	0.000225155	0.0806056	0.0119236	11	CTGTGACTCAGCA	CTGAGTCAGCA	-
snPVvsKNN12.fwd	PKNX1_MOUSE.H11MO.0.A	1	0.00120695	0.432089	0.0519323	10	CTGTGACTCAGCA	CCTGTCAATCA	-
snPVvsKNN12.fwd	MAFK_MOUSE.H11MO.0.A	2	0.00129312	0.462936	0.0523668	13	CTGTGACTCAGCA	AATGCTGACTCAGCAGTTTT	-
snPVvsKNN12.fwd	MAFG_MOUSE.H11MO.0.A	5	0.00166673	0.596689	0.0573723	13	CTGTGACTCAGCA	AAAATTGCTGACTCAGCA	+
snPVvsKNN12.fwd	BATF_MOUSE.H11MO.0.A	7	0.00178269	0.638202	0.0584418	11	CTGTGACTCAGCA	AGTTTCGAAATGACTCAG	+
snPVvsKNN12.fwd	MAF_MOUSE.H11MO.0.A	4	0.00190797	0.683052	0.0597057	13	CTGTGACTCAGCA	AATTTGCTGACTCAGCA	+
snPVvsKNN12.fwd	PBX1_MOUSE.H11MO.0.A	1	0.00223536	0.800257	0.0669093	10	CTGTGACTCAGCA	CCTGTCAATCA	-
snPVvsKNN12.fwd	MAFF_MOUSE.H11MO.0.A	5	0.00325266	1.16445	0.0861257	13	CTGTGACTCAGCA	AAAAATGCTGACTCAGCAAAAA	+
snPVvsKNN12.fwd	ZN322_MOUSE.H11MO.0.B	4	0.00454325	1.62648	0.100896	13	CTGTGACTCAGCA	GAGCCTGGTACAGAGCCTGG	+
snPVvsKNN12.fwd	OVOL1_MOUSE.H11MO.0.C	-1	0.0189462	6.78272	0.372667	9	CTGTGACTCAGCA	TGTAACTGT	+
snPVvsKNN12.fwd	NFAC1_MOUSE.H11MO.0.A	6	0.0244646	8.75833	0.467846	9	CTGTGACTCAGCA	TGGAAAATATGAGTC	+
snPVvsKNN12.fwd	ZFP57_MOUSE.H11MO.0.B	-1	0.0274759	9.83637	0.511231	10	CTGTGACTCAGCA	TTTGCCGCAG	-
snPVvsKNN13.fwd	RORA_MOUSE.H11MO.0.C	0	1.13387e-05	0.00405926	0.00806816	13	AACTGGGTCACAT	AACTAGGTCAGGG	+
snPVvsKNN13.fwd	NR1D1_MOUSE.H11MO.0.A	4	4.64516e-05	0.0166297	0.0107563	13	AACTGGGTCACAT	AGGGAAGTGGGTCAGAAGG	+
snPVvsKNN13.fwd	PPARA_MOUSE.H11MO.0.A	0	5.2609e-05	0.018834	0.0107563	13	AACTGGGTCACAT	AACTAGGTCAAAGGTCA	+
snPVvsKNN13.fwd	PPARG_MOUSE.H11MO.0.A	0	6.21484e-05	0.0222491	0.0107563	13	AACTGGGTCACAT	AAGTGGGGCAAAGGTCA	+
snPVvsKNN13.fwd	RORG_MOUSE.H11MO.0.B	2	8.77933e-05	0.03143	0.0107563	10	AACTGGGTCACAT	GAAAGTGGGTCA	+
snPVvsKNN13.fwd	NR1D2_MOUSE.H11MO.0.A	4	9.06989e-05	0.0324702	0.0107563	13	AACTGGGTCACAT	GGGGAAGTGGGTCAGAGGG	+
snPVvsKNN13.fwd	USF1_MOUSE.H11MO.0.A	-4	0.00457827	1.63902	0.411072	9	AACTGGGTCACAT	GGGTCACGTGGCC	+
snPVvsKNN13.fwd	ATF3_MOUSE.H11MO.0.A	-2	0.00462166	1.65455	0.411072	9	AACTGGGTCACAT	ATGAGTCAC	+
snPVvsKNN13.fwd	ZFP57_MOUSE.H11MO.0.B	-2	0.00549902	1.96865	0.434763	10	AACTGGGTCACAT	CTGCGGCAAA	+
snPVvsKNN13.fwd	TWST1_MOUSE.H11MO.0.B	2	0.00712589	2.55107	0.493951	13	AACTGGGTCACAT	ACATCTGGTTTTAATTA	+
snPVvsKNN13.fwd	JUNB_MOUSE.H11MO.0.A	-2	0.00763601	2.73369	0.493951	9	AACTGGGTCACAT	ATGAGTCAC	+
snPVvsKNN13.fwd	ERR3_MOUSE.H11MO.0.C	-1	0.00851282	3.04759	0.50478	10	AACTGGGTCACAT	TCAAGGTCAC	+
snPVvsKNN13.fwd	MITF_MOUSE.H11MO.0.A	-5	0.0108818	3.8957	0.572072	8	AACTGGGTCACAT	AGTCACGTGG	-
snPVvsKNN13.fwd	FOSB_MOUSE.H11MO.0.A	-2	0.0130548	4.67362	0.572072	9	AACTGGGTCACAT	ATGAGTCAT	+
snPVvsKNN13.fwd	TFEB_MOUSE.H11MO.0.C	-5	0.0130548	4.67362	0.572072	8	AACTGGGTCACAT	GGTCACGTG	+
snPVvsKNN13.fwd	MAFB_MOUSE.H11MO.0.B	-2	0.013159	4.71091	0.572072	11	AACTGGGTCACAT	CTGAGTCAGCA	-
snPVvsKNN13.fwd	TFE3_MOUSE.H11MO.0.A	-5	0.013883	4.97011	0.572072	8	AACTGGGTCACAT	GGTCACGTGA	+
snPVvsKNN13.fwd	USF2_MOUSE.H11MO.0.A	-4	0.0144715	5.18079	0.572072	9	AACTGGGTCACAT	GGGTCACGTGGCCGCGGCG	+
snPVvsKNN13.fwd	BACH2_MOUSE.H11MO.0.A	0	0.0156168	5.59081	0.584855	11	AACTGGGTCACAT	TGCTGAGTCAT	+
snPVvsKNN13.fwd	RXRB_MOUSE.H11MO.0.C	-2	0.0187273	6.70439	0.664667	10	AACTGGGTCACAT	TGAGGTCACA	+
snPVvsKNN13.fwd	ESR1_MOUSE.H11MO.0.A	2	0.0196161	7.02257	0.664667	13	AACTGGGTCACAT	AGGTCAGGGTGACCT	-
snPVvsKNN13.fwd	JUN_MOUSE.H11MO.0.A	-1	0.0250291	8.96041	0.809529	10	AACTGGGTCACAT	GGTGAGTCAC	+
MoPVvsEXC1.fwd	RORA_MOUSE.H11MO.0.C	0	1.61246e-06	0.00057726	0.00112467	13	CTCTGACCTTGAT	CCCTGACCTAGTT	-
MoPVvsEXC1.fwd	ERR3_MOUSE.H11MO.0.C	-2	5.49846e-06	0.00196845	0.00191755	10	CTCTGACCTTGAT	GTGACCTTGA	-
MoPVvsEXC1.fwd	NR4A2_MOUSE.H11MO.0.C	-2	0.000163257	0.0584462	0.0292188	9	CTCTGACCTTGAT	GTGACCTTT	-
MoPVvsEXC1.fwd	NR1D2_MOUSE.H11MO.0.A	2	0.000167566	0.0599886	0.0292188	13	CTCTGACCTTGAT	CCCTCTGACCCACTTCCCC	-
MoPVvsEXC1.fwd	COT1_MOUSE.H11MO.0.B	-3	0.0004372	0.156517	0.0509036	9	CTCTGACCTTGAT	TGACCTTTG	-
MoPVvsEXC1.fwd	PPARA_MOUSE.H11MO.0.A	4	0.000437889	0.156764	0.0509036	13	CTCTGACCTTGAT	TGACCTTTGACCTAGTT	-
MoPVvsEXC1.fwd	COT2_MOUSE.H11MO.0.A	0	0.000635532	0.22752	0.0575227	13	CTCTGACCTTGAT	CTCTGACCTTTGG	-
MoPVvsEXC1.fwd	NR5A2_MOUSE.H11MO.0.A	-3	0.000672282	0.240677	0.0575227	10	CTCTGACCTTGAT	TGACCTTGAAC	-
MoPVvsEXC1.fwd	ERR1_MOUSE.H11MO.0.A	-3	0.000800732	0.286662	0.0575227	10	CTCTGACCTTGAT	TGACCTTGACCT	-
MoPVvsEXC1.fwd	NR1D1_MOUSE.H11MO.0.A	2	0.00084239	0.301575	0.0575227	13	CTCTGACCTTGAT	CCTTCTGACCCACTTCCCT	-
MoPVvsEXC1.fwd	RARA_MOUSE.H11MO.0.A	-3	0.00101689	0.364046	0.0575227	10	CTCTGACCTTGAT	TGACCTTGAACTTCTGACCC	-
MoPVvsEXC1.fwd	PPARG_MOUSE.H11MO.0.A	4	0.00104872	0.375443	0.0575227	13	CTCTGACCTTGAT	TGACCTTTGCCCCACTT	-
MoPVvsEXC1.fwd	VDR_MOUSE.H11MO.0.A	6	0.00108832	0.389619	0.0575227	10	CTCTGACCTTGAT	TGAACCCACTGACCCC	-
MoPVvsEXC1.fwd	RXRB_MOUSE.H11MO.0.C	-1	0.00121311	0.434292	0.0575227	10	CTCTGACCTTGAT	TGTGACCTCA	-
MoPVvsEXC1.fwd	STF1_MOUSE.H11MO.0.B	-3	0.00123707	0.442871	0.0575227	10	CTCTGACCTTGAT	TGGCCTTGAGC	-
MoPVvsEXC1.fwd	RXRG_MOUSE.H11MO.0.B	-3	0.00188892	0.676234	0.078204	10	CTCTGACCTTGAT	TGACCTTGAACTCCTGACCCTC	-
MoPVvsEXC1.fwd	RORG_MOUSE.H11MO.0.B	-3	0.00191036	0.683909	0.078204	10	CTCTGACCTTGAT	TGACCCACTTTC	-
MoPVvsEXC1.fwd	ESR2_MOUSE.H11MO.0.A	6	0.00201821	0.722517	0.078204	9	CTCTGACCTTGAT	AGGTCACCCTGACCT	+
MoPVvsEXC1.fwd	RXRA_MOUSE.H11MO.0.A	-3	0.002422	0.867075	0.0889112	10	CTCTGACCTTGAT	TGACCTTGAACTCCTGACCCT	-
MoPVvsEXC1.fwd	NR2C2_MOUSE.H11MO.0.A	4	0.0025711	0.920455	0.0896656	9	CTCTGACCTTGAT	TGACCTTTGACCT	-
MoPVvsEXC1.fwd	RARG_MOUSE.H11MO.0.C	9	0.00293725	1.05154	0.0975569	9	CTCTGACCTTGAT	CCCAGGTCACTCTGACCT	-
MoPVvsEXC1.fwd	ESR1_MOUSE.H11MO.0.A	6	0.00439125	1.57207	0.13922	9	CTCTGACCTTGAT	AGGTCACCCTGACCT	+
MoPVvsEXC1.fwd	PRD14_MOUSE.H11MO.0.A	6	0.00764314	2.73624	0.231782	10	CTCTGACCTTGAT	CAAGGTCTCTAACCCT	-
MoPVvsEXC1.fwd	NR1H4_MOUSE.H11MO.0.A	9	0.0144657	5.17873	0.403587	10	CTCTGACCTTGAT	CCTCGGGGTCATTGACCCC	-
MoPVvsEXC1.fwd	NR4A1_MOUSE.H11MO.0.B	-3	0.0156831	5.61456	0.418267	9	CTCTGACCTTGAT	TGACCTTTT	-
MoPVvsEXC1.fwd	NR1I3_MOUSE.H11MO.0.C	8	0.0161913	5.79648	0.418267	10	CTCTGACCTTGAT	CTGAACTTTCCTGACCCC	-
MoPVvsEXC1.fwd	NR1H3_MOUSE.H11MO.0.A	-2	0.0171939	6.15541	0.422014	11	CTCTGACCTTGAT	CTGACCTTTGACCTC	-
MoPVvsEXC1.fwd	GFI1_MOUSE.H11MO.0.C	1	0.018037	6.45725	0.422014	9	CTCTGACCTTGAT	GCTGTGATTT	+
MoPVvsEXC1.fwd	REST_MOUSE.H11MO.0.A	3	0.0181515	6.49822	0.422014	13	CTCTGACCTTGAT	GGGCGCTGTCCATGGTGCTGAA	-
MoPVvsEXC1.fwd	NKX28_MOUSE.H11MO.0.C	-4	0.0190482	6.81926	0.428577	9	CTCTGACCTTGAT	GTCCTTGAA	-
MoPVvsEXC1.fwd	ERR2_MOUSE.H11MO.0.A	1	0.024805	8.88019	0.540662	13	CTCTGACCTTGAT	AGGATGACCTTGAACTT	-
MoPVvsEXC2.fwd	LHX6_MOUSE.H11MO.0.C	-2	1.73908e-05	0.0062259	0.0120754	9	CTGTAATCAGAAT	GTAATCAGC	-
MoPVvsEXC2.fwd	DLX3_MOUSE.H11MO.0.C	-1	9.70823e-05	0.0347555	0.033705	10	CTGTAATCAGAAT	TGTAATTATC	-
MoPVvsEXC2.fwd	LHX3_MOUSE.H11MO.0.C	-2	0.000241407	0.0864235	0.0558743	9	CTGTAATCAGAAT	TTAATTAGC	-
MoPVvsEXC2.fwd	FOXO3_MOUSE.H11MO.0.B	-1	0.00047094	0.168597	0.077111	10	CTGTAATCAGAAT	TGTAAACAGG	-
MoPVvsEXC2.fwd	PRRX2_MOUSE.H11MO.0.C	-3	0.000629865	0.225492	0.077111	7	CTGTAATCAGAAT	CAATTAA	-
MoPVvsEXC2.fwd	HXB4_MOUSE.H11MO.0.A	-2	0.000704865	0.252342	0.077111	8	CTGTAATCAGAAT	GCCATTAA	-
MoPVvsEXC2.fwd	DLX5_MOUSE.H11MO.0.C	2	0.00080991	0.289948	0.077111	9	CTGTAATCAGAAT	ACCTATAATTA	-
MoPVvsEXC2.fwd	FOXP2_MOUSE.H11MO.0.A	-1	0.000888428	0.318057	0.077111	9	CTGTAATCAGAAT	AGTAAACAA	-
MoPVvsEXC2.fwd	NOBOX_MOUSE.H11MO.0.C	-1	0.00190011	0.680239	0.146595	9	CTGTAATCAGAAT	ACCAATTAG	-
MoPVvsEXC2.fwd	HXB7_MOUSE.H11MO.0.C	0	0.00257505	0.921867	0.172363	10	CTGTAATCAGAAT	CATTAATCAA	-
MoPVvsEXC2.fwd	VSX2_MOUSE.H11MO.0.C	-2	0.00273057	0.977544	0.172363	11	CTGTAATCAGAAT	TTAATTAGCTTC	+
MoPVvsEXC2.fwd	SP7_MOUSE.H11MO.0.A	5	0.00316209	1.13203	0.178028	9	CTGTAATCAGAAT	CAAACCTGTAATTA	+
MoPVvsEXC2.fwd	HXB8_MOUSE.H11MO.0.C	1	0.00336457	1.20452	0.178028	10	CTGTAATCAGAAT	GCATTAATCAA	-
MoPVvsEXC2.fwd	ALX1_MOUSE.H11MO.0.B	-2	0.00358948	1.28504	0.178028	11	CTGTAATCAGAAT	ATAATTGGATTA	+
MoPVvsEXC2.fwd	PROP1_MOUSE.H11MO.0.C	-3	0.00476756	1.70679	0.21079	10	CTGTAATCAGAAT	TAATTGAATTA	+
MoPVvsEXC2.fwd	ISL1_MOUSE.H11MO.0.A	-2	0.00485721	1.73888	0.21079	9	CTGTAATCAGAAT	TCCATTAGC	-
MoPVvsEXC2.fwd	FOXK1_MOUSE.H11MO.0.A	0	0.00584497	2.0925	0.235105	11	CTGTAATCAGAAT	ATGTAAACAAG	-
MoPVvsEXC2.fwd	FOXO1_MOUSE.H11MO.0.A	-2	0.00609466	2.18189	0.235105	10	CTGTAATCAGAAT	GTAAACAGGC	-
MoPVvsEXC2.fwd	PBX3_MOUSE.H11MO.0.A	2	0.00819322	2.93317	0.270907	12	CTGTAATCAGAAT	CCAGCCAATCAGAG	-
MoPVvsEXC2.fwd	NFYC_MOUSE.H11MO.0.B	2	0.00870819	3.11753	0.274846	12	CTGTAATCAGAAT	TCAGCCAATCAGAA	+
MoPVvsEXC2.fwd	FOXA2_MOUSE.H11MO.0.A	1	0.0097064	3.47489	0.293032	12	CTGTAATCAGAAT	AAAGTAAACAAGG	-
MoPVvsEXC2.fwd	LHX2_MOUSE.H11MO.0.A	-1	0.0104376	3.73666	0.301977	10	CTGTAATCAGAAT	ACTAATTAAC	-
MoPVvsEXC2.fwd	NFYA_MOUSE.H11MO.0.A	2	0.0110779	3.96589	0.305485	12	CTGTAATCAGAAT	TCAGCCAATCAGAA	+
MoPVvsEXC2.fwd	BARX1_MOUSE.H11MO.0.C	1	0.0114388	4.09508	0.305485	11	CTGTAATCAGAAT	AAAACAATTAAA	-
MoPVvsEXC2.fwd	NKX25_MOUSE.H11MO.0.A	-2	0.0118892	4.25634	0.305755	10	CTGTAATCAGAAT	CCACTCCAGA	-
MoPVvsEXC2.fwd	FOXA1_MOUSE.H11MO.0.A	1	0.0153487	5.49484	0.380625	9	CTGTAATCAGAAT	TATGTAAACA	-
MoPVvsEXC2.fwd	FOXA3_MOUSE.H11MO.0.A	2	0.0165496	5.92476	0.396254	11	CTGTAATCAGAAT	CAAAGTAAACAAG	-
MoPVvsEXC2.fwd	MEF2D_MOUSE.H11MO.0.A	2	0.0176578	6.32148	0.402599	12	CTGTAATCAGAAT	AGCTAAAAATAGCA	-
MoPVvsEXC2.fwd	NKX21_MOUSE.H11MO.0.A	-2	0.0185075	6.62567	0.402599	10	CTGTAATCAGAAT	CCACTCAAGA	-
MoPVvsEXC2.fwd	NFYB_MOUSE.H11MO.0.A	1	0.0185667	6.64688	0.402599	12	CTGTAATCAGAAT	CAGCCAATCAGAG	+
MoPVvsEXC2.fwd	MEF2C_MOUSE.H11MO.0.A	2	0.0191338	6.84991	0.402599	13	CTGTAATCAGAAT	AGCTAAAAATAGAAC	-
MoPVvsEXC2.fwd	NKX61_MOUSE.H11MO.0.A	-3	0.0209307	7.49318	0.427453	10	CTGTAATCAGAAT	TAATTAAAATCCCATTAAT	-
MoPVvsEXC2.fwd	SMAD3_MOUSE.H11MO.0.B	2	0.021934	7.85239	0.435146	10	CTGTAATCAGAAT	CTCTGTCACCTG	+
MoPVvsEXC2.fwd	STAT6_MOUSE.H11MO.0.A	0	0.0233902	8.37369	0.440114	13	CTGTAATCAGAAT	CAGTTCTCAGGAAA	-
MoPVvsEXC2.fwd	SIX2_MOUSE.H11MO.0.A	-1	0.0247199	8.84971	0.440114	12	CTGTAATCAGAAT	TGAAACCTGATACC	+
MoPVvsEXC2.fwd	MEF2A_MOUSE.H11MO.0.A	2	0.0247199	8.84971	0.440114	12	CTGTAATCAGAAT	TGCTAAAAATAGAA	-
MoPVvsEXC2.fwd	TBX20_MOUSE.H11MO.0.C	2	0.0247199	8.84971	0.440114	12	CTGTAATCAGAAT	ACCTGTCAGCACCT	-
MoPVvsEXC2.fwd	FOXL2_MOUSE.H11MO.0.C	2	0.0260842	9.33813	0.444116	9	CTGTAATCAGAAT	AAATGTAAACA	-
MoPVvsEXC2.fwd	FOXD3_MOUSE.H11MO.0.C	4	0.0266969	9.55748	0.444116	11	CTGTAATCAGAAT	TGCTAAGTAAACAAA	-
MoPVvsEXC2.fwd	FOXI1_MOUSE.H11MO.0.B	0	0.0275031	9.8461	0.444116	12	CTGTAATCAGAAT	AACCAATCAGAG	-
MoPVvsEXC2.fwd	RUNX3_MOUSE.H11MO.0.A	2	0.0275031	9.8461	0.444116	10	CTGTAATCAGAAT	GGCTGTGGTTTG	+
MoPVvsEXC3.fwd	TFE2_MOUSE.H11MO.0.A	-1	7.43306e-07	0.000266104	0.000522182	11	GCTGCAGCTGTTT	CTGCAGCTGTG	-
MoPVvsEXC3.fwd	MYF6_MOUSE.H11MO.0.C	-3	8.59812e-05	0.0307813	0.0214384	7	GCTGCAGCTGTTT	GCAGCTG	-
MoPVvsEXC3.fwd	ASCL1_MOUSE.H11MO.0.A	-1	0.000108	0.038664	0.0214384	12	GCTGCAGCTGTTT	CTGCAGCTGCCCCC	+
MoPVvsEXC3.fwd	SNAI2_MOUSE.H11MO.0.A	-1	0.000122067	0.0436999	0.0214384	11	GCTGCAGCTGTTT	ATGCACCTGCC	-
MoPVvsEXC3.fwd	MYOG_MOUSE.H11MO.0.A	-1	0.000175176	0.0627131	0.0246127	12	GCTGCAGCTGTTT	CCGCAGCTGTCCC	+
MoPVvsEXC3.fwd	LYL1_MOUSE.H11MO.0.A	-3	0.000731337	0.261819	0.0733962	10	GCTGCAGCTGTTT	CCAGCTGTTTCCTG	+
MoPVvsEXC3.fwd	ASCL2_MOUSE.H11MO.0.C	-3	0.00097464	0.348921	0.0855871	9	GCTGCAGCTGTTT	CCAGCTGCT	+
MoPVvsEXC3.fwd	ITF2_MOUSE.H11MO.0.B	-2	0.00144066	0.515758	0.0968306	9	GCTGCAGCTGTTT	TGCACCTGG	-
MoPVvsEXC3.fwd	HEN1_MOUSE.H11MO.0.C	3	0.00151618	0.542793	0.0968306	13	GCTGCAGCTGTTT	AGGGACGCAGCTGCTCCCCA	-
MoPVvsEXC3.fwd	MYOD1_MOUSE.H11MO.0.A	-3	0.00220667	0.789987	0.124127	10	GCTGCAGCTGTTT	GCAGCTGTTCCTGTC	+
MoPVvsEXC3.fwd	BHA15_MOUSE.H11MO.0.A	0	0.00229696	0.822313	0.124127	11	GCTGCAGCTGTTT	GCAGCAGCTGG	+
MoPVvsEXC3.fwd	OLIG2_MOUSE.H11MO.0.A	-3	0.00407907	1.46031	0.19104	10	GCTGCAGCTGTTT	CCAGCTGTTTCCCTTCTG	+
MoPVvsEXC3.fwd	ATOH1_MOUSE.H11MO.0.B	-3	0.00499677	1.78885	0.203411	9	GCTGCAGCTGTTT	CCATCTGCT	-
MoPVvsEXC3.fwd	PTF1A_MOUSE.H11MO.0.A	-3	0.00521187	1.86585	0.203411	10	GCTGCAGCTGTTT	CCAGCTGCCCCCTTTCCC	+
MoPVvsEXC3.fwd	TGIF1_MOUSE.H11MO.0.A	-4	0.00613561	2.19655	0.22686	9	GCTGCAGCTGTTT	CAGCTGTCA	-
MoPVvsEXC3.fwd	OVOL1_MOUSE.H11MO.0.C	-2	0.00972555	3.48175	0.335761	9	GCTGCAGCTGTTT	TGTAACTGT	+
MoPVvsEXC3.fwd	HTF4_MOUSE.H11MO.0.A	-2	0.0129989	4.65359	0.415084	10	GCTGCAGCTGTTT	AGCAGGTGGG	+
MoPVvsEXC3.fwd	PRDM9_MOUSE.H11MO.0.C	2	0.0147958	5.29689	0.44708	13	GCTGCAGCTGTTT	CAGATGCTGCTGCCATCTT	-
MoPVvsEXC3.fwd	ZFP42_MOUSE.H11MO.0.A	-2	0.0152736	5.46797	0.44708	11	GCTGCAGCTGTTT	GGCAGCCATTTT	+
MoPVvsEXC3.fwd	NDF2_MOUSE.H11MO.0.A	-2	0.0246431	8.82222	0.641188	10	GCTGCAGCTGTTT	GCCATCTGTT	-
MoPVvsEXC4.fwd	MAF_MOUSE.H11MO.0.A	3	1.98533e-05	0.00710747	0.014007	13	AAAGTCAGCAGTT	TGCTGAGTCAGCAAATT	-
MoPVvsEXC4.fwd	NFE2_MOUSE.H11MO.0.A	1	7.69514e-05	0.0275486	0.0178749	13	AAAGTCAGCAGTT	ATGACTCAGCAGTT	+
MoPVvsEXC4.fwd	MAFG_MOUSE.H11MO.0.A	3	0.000100677	0.0360423	0.0178749	13	AAAGTCAGCAGTT	TGCTGAGTCAGCAATTTT	-
MoPVvsEXC4.fwd	MAFK_MOUSE.H11MO.0.A	5	0.000101342	0.0362804	0.0178749	13	AAAGTCAGCAGTT	AATGCTGACTCAGCAGTTTT	-
MoPVvsEXC4.fwd	NF2L2_MOUSE.H11MO.0.A	1	0.000171701	0.0614688	0.0242279	13	AAAGTCAGCAGTT	ATGACTCAGCAATT	+
MoPVvsEXC4.fwd	MAFB_MOUSE.H11MO.0.B	1	0.000879496	0.314859	0.100027	10	AAAGTCAGCAGTT	CTGAGTCAGCA	-
MoPVvsEXC4.fwd	NR2E3_MOUSE.H11MO.0.C	0	0.00105024	0.375986	0.100027	13	AAAGTCAGCAGTT	AAAGTCAAAAGTCA	+
MoPVvsEXC4.fwd	MAFF_MOUSE.H11MO.0.A	8	0.00113421	0.406048	0.100027	13	AAAGTCAGCAGTT	AAAAATGCTGACTCAGCAAAAA	+
MoPVvsEXC4.fwd	RXRG_MOUSE.H11MO.0.B	1	0.00291475	1.04348	0.175687	13	AAAGTCAGCAGTT	GAGGGTCAGGAGTTCAAGGTCA	+
MoPVvsEXC4.fwd	PTF1A_MOUSE.H11MO.0.A	3	0.00301889	1.08076	0.175687	13	AAAGTCAGCAGTT	GGGAAAGGGGGCAGCTGG	-
MoPVvsEXC4.fwd	TBX20_MOUSE.H11MO.0.C	1	0.00320062	1.14582	0.175687	13	AAAGTCAGCAGTT	ACCTGTCAGCACCT	-
MoPVvsEXC4.fwd	RXRA_MOUSE.H11MO.0.A	0	0.0032372	1.15892	0.175687	13	AAAGTCAGCAGTT	AGGGTCAGGAGTTCAAGGTCA	+
MoPVvsEXC4.fwd	PRDM9_MOUSE.H11MO.0.C	2	0.00466278	1.66927	0.23498	13	AAAGTCAGCAGTT	AAGATGGCAGCAGCATCTG	+
MoPVvsEXC4.fwd	FOXP2_MOUSE.H11MO.0.A	-2	0.00509769	1.82497	0.239771	9	AAAGTCAGCAGTT	AGTAAACAA	-
MoPVvsEXC4.fwd	RARA_MOUSE.H11MO.0.A	-1	0.00662201	2.37068	0.292001	12	AAAGTCAGCAGTT	GGGTCAGAAGTTCAAGGTCA	+
MoPVvsEXC4.fwd	BACH2_MOUSE.H11MO.0.A	1	0.00840897	3.01041	0.348986	10	AAAGTCAGCAGTT	ATGACTCAGCA	-
MoPVvsEXC4.fwd	ETV2_MOUSE.H11MO.0.A	0	0.0102631	3.67421	0.402274	13	AAAGTCAGCAGTT	GGAAACAGGAAGTGGG	+
MoPVvsEXC4.fwd	FOXA1_MOUSE.H11MO.0.A	0	0.0137711	4.93004	0.511362	10	AAAGTCAGCAGTT	TATGTAAACA	-
MoPVvsEXC4.fwd	BACH1_MOUSE.H11MO.0.C	4	0.0173349	6.2059	0.59757	10	AAAGTCAGCAGTT	ACCATGACTCAGCA	-
MoPVvsEXC4.fwd	TGIF1_MOUSE.H11MO.0.A	-2	0.0225088	8.05814	0.657312	9	AAAGTCAGCAGTT	TGACAGCTG	+
MoPVvsEXC4.fwd	FOXQ1_MOUSE.H11MO.0.C	-1	0.0230743	8.2606	0.657312	12	AAAGTCAGCAGTT	AAATAAACAATT	-
MoPVvsEXC4.fwd	NR1I3_MOUSE.H11MO.0.C	0	0.0232915	8.33836	0.657312	13	AAAGTCAGCAGTT	GGGGTCAGGAAAGTTCAG	+
MoPVvsEXC4.fwd	ETS2_MOUSE.H11MO.0.A	1	0.0261284	9.35398	0.709013	12	AAAGTCAGCAGTT	GGAAGGAAGAGGA	+
MoPVvsEXC4.fwd	HNF6_MOUSE.H11MO.0.A	-1	0.0277869	9.94772	0.726091	11	AAAGTCAGCAGTT	AAATCAATAAA	-
MoPVvsEXC5.fwd	MEF2C_MOUSE.H11MO.0.A	0	1.6254e-08	5.81895e-06	7.62559e-06	13	GGGCTATTTATAG	GTTCTATTTTTAGCT	+
MoPVvsEXC5.fwd	MEF2D_MOUSE.H11MO.0.A	-1	2.17241e-08	7.77722e-06	7.62559e-06	12	GGGCTATTTATAG	TGCTATTTTTAGCT	+
MoPVvsEXC5.fwd	MEF2A_MOUSE.H11MO.0.A	-1	2.3939e-07	8.57018e-05	5.60206e-05	12	GGGCTATTTATAG	TTCTATTTTTAGCA	+
MoPVvsEXC5.fwd	TBP_MOUSE.H11MO.0.A	-3	0.000281499	0.100777	0.049406	10	GGGCTATTTATAG	CCTTTTATAG	-
MoPVvsEXC5.fwd	CDX1_MOUSE.H11MO.0.C	-5	0.000354554	0.12693	0.0497823	8	GGGCTATTTATAG	ATTTATGT	+
MoPVvsEXC5.fwd	DLX5_MOUSE.H11MO.0.C	-4	0.00156993	0.562037	0.157451	9	GGGCTATTTATAG	TAATTATAGGT	+
MoPVvsEXC5.fwd	FOXO1_MOUSE.H11MO.0.A	-1	0.00314597	1.12626	0.22086	10	GGGCTATTTATAG	GCCTGTTTAC	+
MoPVvsEXC5.fwd	FOXJ2_MOUSE.H11MO.0.C	0	0.00438627	1.57028	0.27994	10	GGGCTATTTATAG	TGTTTATTTA	+
MoPVvsEXC5.fwd	HXA9_MOUSE.H11MO.0.B	-2	0.00516333	1.84847	0.296254	11	GGGCTATTTATAG	ATGATTTATGG	+
MoPVvsEXC5.fwd	FOXJ3_MOUSE.H11MO.0.A	1	0.00548586	1.96394	0.296254	12	GGGCTATTTATAG	TTGTTTATTTTTT	+
MoPVvsEXC5.fwd	CDX4_MOUSE.H11MO.0.A	-3	0.00612541	2.1929	0.307163	10	GGGCTATTTATAG	TGATTTATGGCC	+
MoPVvsEXC5.fwd	SP7_MOUSE.H11MO.0.A	-4	0.00658961	2.35908	0.308412	9	GGGCTATTTATAG	TAATTACAGGTTTG	-
MoPVvsEXC5.fwd	EVX1_MOUSE.H11MO.0.C	-3	0.00739727	2.64822	0.324574	10	GGGCTATTTATAG	TGATTTATGGCCT	+
MoPVvsEXC5.fwd	SRF_MOUSE.H11MO.0.A	1	0.00860384	3.08017	0.355308	13	GGGCTATTTATAG	ATGGCCAAATAAGGAAA	-
MoPVvsEXC5.fwd	NKX61_MOUSE.H11MO.0.A	6	0.0108809	3.89538	0.387718	13	GGGCTATTTATAG	ATTAATGGGATTTTAATTA	+
MoPVvsEXC5.fwd	MEIS1_MOUSE.H11MO.0.A	-2	0.0110454	3.95427	0.387718	11	GGGCTATTTATAG	ATGATTTATGGC	+
MoPVvsEXC5.fwd	FOXP2_MOUSE.H11MO.0.A	-3	0.0137407	4.91918	0.445811	9	GGGCTATTTATAG	TTGTTTACT	+
MoPVvsEXC5.fwd	FOXK1_MOUSE.H11MO.0.A	-2	0.0144329	5.16699	0.445811	11	GGGCTATTTATAG	CTTGTTTACAT	+
MoPVvsEXC5.fwd	FOXO3_MOUSE.H11MO.0.B	-2	0.0146055	5.22877	0.445811	10	GGGCTATTTATAG	CCTGTTTACA	+
MoPVvsEXC5.fwd	CUX1_MOUSE.H11MO.0.C	1	0.016428	5.88124	0.469971	13	GGGCTATTTATAG	AGGGGGATCGATGG	+
MoPVvsEXC5.fwd	HNF1A_MOUSE.H11MO.0.A	0	0.0167429	5.99396	0.469971	13	GGGCTATTTATAG	GGTTAATTATTAACC	-
MoPVvsEXC5.fwd	VSX2_MOUSE.H11MO.0.C	1	0.0174053	6.23111	0.469971	11	GGGCTATTTATAG	GAAGCTAATTAA	-
MoPVvsEXC5.fwd	SOX5_MOUSE.H11MO.0.C	-4	0.0191104	6.84151	0.487686	8	GGGCTATTTATAG	TATTGTTA	+
MoPVvsEXC5.fwd	RUNX3_MOUSE.H11MO.0.A	-1	0.0194507	6.96337	0.487686	12	GGGCTATTTATAG	GGCTGTGGTTTG	+
MoPVvsEXC5.fwd	PRRX2_MOUSE.H11MO.0.C	-3	0.0229238	8.20671	0.536447	7	GGGCTATTTATAG	TTAATTG	+
MoPVvsEXC5.fwd	HXA10_MOUSE.H11MO.0.C	-1	0.0255364	9.14204	0.568348	12	GGGCTATTTATAG	GATAATTTATGA	+
MoPVvsEXC5.fwd	DLX3_MOUSE.H11MO.0.C	-2	0.0259061	9.27439	0.568348	10	GGGCTATTTATAG	GATAATTACA	+
MoPVvsEXC6.fwd	NR5A2_MOUSE.H11MO.0.A	-2	1.16943e-06	0.000418654	0.000820361	11	AAAGACCTTGGAC	TGACCTTGAAC	-
MoPVvsEXC6.fwd	ERR1_MOUSE.H11MO.0.A	-2	3.76236e-06	0.00134692	0.0010306	11	AAAGACCTTGGAC	TGACCTTGACCT	-
MoPVvsEXC6.fwd	STF1_MOUSE.H11MO.0.B	-2	4.40736e-06	0.00157784	0.0010306	11	AAAGACCTTGGAC	TGGCCTTGAGC	-
MoPVvsEXC6.fwd	ERR2_MOUSE.H11MO.0.A	2	8.39329e-06	0.0030048	0.00147199	13	AAAGACCTTGGAC	AGGATGACCTTGAACTT	-
MoPVvsEXC6.fwd	RARA_MOUSE.H11MO.0.A	-2	6.70664e-05	0.0240098	0.00882185	11	AAAGACCTTGGAC	TGACCTTGAACTTCTGACCC	-
MoPVvsEXC6.fwd	RXRG_MOUSE.H11MO.0.B	-2	7.54533e-05	0.0270123	0.00882185	11	AAAGACCTTGGAC	TGACCTTGAACTCCTGACCCTC	-
MoPVvsEXC6.fwd	RXRA_MOUSE.H11MO.0.A	-2	8.85686e-05	0.0317075	0.00887593	11	AAAGACCTTGGAC	TGACCTTGAACTCCTGACCCT	-
MoPVvsEXC6.fwd	ERR3_MOUSE.H11MO.0.C	-1	0.000260935	0.0934147	0.022881	10	AAAGACCTTGGAC	GTGACCTTGA	-
MoPVvsEXC6.fwd	NR1H3_MOUSE.H11MO.0.A	-1	0.0005239	0.187556	0.0408355	12	AAAGACCTTGGAC	CTGACCTTTGACCTC	-
MoPVvsEXC6.fwd	NR2C2_MOUSE.H11MO.0.A	-2	0.000704212	0.252108	0.049401	11	AAAGACCTTGGAC	TGACCTTTGACCT	-
MoPVvsEXC6.fwd	NKX28_MOUSE.H11MO.0.C	-3	0.00125133	0.447975	0.0798014	9	AAAGACCTTGGAC	GTCCTTGAA	-
MoPVvsEXC6.fwd	PPARA_MOUSE.H11MO.0.A	-2	0.00173698	0.621838	0.0966374	11	AAAGACCTTGGAC	TGACCTTTGACCTAGTT	-
MoPVvsEXC6.fwd	COT1_MOUSE.H11MO.0.B	-2	0.00184017	0.65878	0.0966374	9	AAAGACCTTGGAC	TGACCTTTG	-
MoPVvsEXC6.fwd	HNF4A_MOUSE.H11MO.0.A	-1	0.00202883	0.72632	0.0966374	12	AAAGACCTTGGAC	TGGACTTTGGCCTT	-
MoPVvsEXC6.fwd	PRD14_MOUSE.H11MO.0.A	6	0.00206635	0.739754	0.0966374	10	AAAGACCTTGGAC	AGGGTTAGAGACCTTG	+
MoPVvsEXC6.fwd	RARG_MOUSE.H11MO.0.C	7	0.00259879	0.930365	0.113942	11	AAAGACCTTGGAC	AGGTCAGAGTGACCTGGG	+
MoPVvsEXC6.fwd	PPARG_MOUSE.H11MO.0.A	-2	0.00356302	1.27556	0.147028	11	AAAGACCTTGGAC	TGACCTTTGCCCCACTT	-
MoPVvsEXC6.fwd	HNF4G_MOUSE.H11MO.0.C	-1	0.00463832	1.66052	0.180768	12	AAAGACCTTGGAC	TGGACTTTGGACTC	-
MoPVvsEXC6.fwd	REST_MOUSE.H11MO.0.A	2	0.00691845	2.4768	0.255439	13	AAAGACCTTGGAC	TTCAGCACCATGGACAGCGCCC	+
MoPVvsEXC6.fwd	NR2E3_MOUSE.H11MO.0.C	-2	0.00797433	2.85481	0.279703	11	AAAGACCTTGGAC	TGACTTTTGACTTT	-
MoPVvsEXC6.fwd	RUNX2_MOUSE.H11MO.0.A	-1	0.0123489	4.42089	0.412515	12	AAAGACCTTGGAC	CAAACCACAGAC	-
MoPVvsEXC6.fwd	NR2C1_MOUSE.H11MO.0.C	-1	0.0148636	5.32118	0.473372	12	AAAGACCTTGGAC	CTGACCTCTGGCC	-
MoPVvsEXC6.fwd	RUNX1_MOUSE.H11MO.0.A	-1	0.0155202	5.55624	0.473372	12	AAAGACCTTGGAC	CAAACCACAGAC	-
MoPVvsEXC6.fwd	ZN322_MOUSE.H11MO.0.B	9	0.0166679	5.96712	0.487195	11	AAAGACCTTGGAC	GAGCCTGGTACAGAGCCTGG	+
MoPVvsEXC6.fwd	NR4A2_MOUSE.H11MO.0.C	-1	0.0189798	6.79475	0.532578	9	AAAGACCTTGGAC	GTGACCTTT	-
MoPVvsEXC6.fwd	BARX1_MOUSE.H11MO.0.C	0	0.0216516	7.75128	0.577688	12	AAAGACCTTGGAC	AAAACAATTAAA	-
MoPVvsEXC6.fwd	IRF4_MOUSE.H11MO.0.A	4	0.0222343	7.9599	0.577688	13	AAAGACCTTGGAC	AAAAGAGGAACTGAAACT	+
MoPVvsEXC6.fwd	NKX31_MOUSE.H11MO.0.C	0	0.0241314	8.63904	0.604584	12	AAAGACCTTGGAC	AAAGCACTTAAC	-
MoPVvsEXC6.fwd	ZN431_MOUSE.H11MO.0.C	4	0.0266974	9.55768	0.635617	13	AAAGACCTTGGAC	AGATACCAACCTAAGACAGGCAC	+
MoPVvsEXC6.fwd	THA_MOUSE.H11MO.0.C	8	0.0271822	9.73123	0.635617	9	AAAGACCTTGGAC	TGTCCTCAGATGACCTC	-
MoPVvsEXCrbf1.fwd	ERR3_MOUSE.H11MO.0.C	-2	1.45292e-06	0.000520146	0.00101486	10	CTCTGACCTTGAT	GTGACCTTGA	-
MoPVvsEXCrbf1.fwd	RORA_MOUSE.H11MO.0.C	0	5.60484e-06	0.00200653	0.00195747	13	CTCTGACCTTGAT	CCCTGACCTAGTT	-
MoPVvsEXCrbf1.fwd	NR4A2_MOUSE.H11MO.0.C	-2	0.000184936	0.0662071	0.0416915	9	CTCTGACCTTGAT	GTGACCTTT	-
MoPVvsEXCrbf1.fwd	COT1_MOUSE.H11MO.0.B	-3	0.000301377	0.107893	0.0416915	9	CTCTGACCTTGAT	TGACCTTTG	-
MoPVvsEXCrbf1.fwd	NR1D2_MOUSE.H11MO.0.A	2	0.000345057	0.12353	0.0416915	13	CTCTGACCTTGAT	CCCTCTGACCCACTTCCCC	-
MoPVvsEXCrbf1.fwd	NR5A2_MOUSE.H11MO.0.A	-3	0.000368028	0.131754	0.0416915	10	CTCTGACCTTGAT	TGACCTTGAAC	-
MoPVvsEXCrbf1.fwd	ERR1_MOUSE.H11MO.0.A	-3	0.000417814	0.149578	0.0416915	10	CTCTGACCTTGAT	TGACCTTGACCT	-
MoPVvsEXCrbf1.fwd	RARA_MOUSE.H11MO.0.A	-3	0.000487308	0.174456	0.0425476	10	CTCTGACCTTGAT	TGACCTTGAACTTCTGACCC	-
MoPVvsEXCrbf1.fwd	STF1_MOUSE.H11MO.0.B	-3	0.000691205	0.247451	0.0536446	10	CTCTGACCTTGAT	TGGCCTTGAGC	-
MoPVvsEXCrbf1.fwd	PPARA_MOUSE.H11MO.0.A	4	0.000780941	0.279577	0.0545482	13	CTCTGACCTTGAT	TGACCTTTGACCTAGTT	-
MoPVvsEXCrbf1.fwd	RXRG_MOUSE.H11MO.0.B	-3	0.000924565	0.330994	0.0587092	10	CTCTGACCTTGAT	TGACCTTGAACTCCTGACCCTC	-
MoPVvsEXCrbf1.fwd	COT2_MOUSE.H11MO.0.A	0	0.00101758	0.364293	0.0592308	13	CTCTGACCTTGAT	CTCTGACCTTTGG	-
MoPVvsEXCrbf1.fwd	RXRA_MOUSE.H11MO.0.A	-3	0.00137994	0.494019	0.0741445	10	CTCTGACCTTGAT	TGACCTTGAACTCCTGACCCT	-
MoPVvsEXCrbf1.fwd	PPARG_MOUSE.H11MO.0.A	4	0.00155934	0.558245	0.0777993	13	CTCTGACCTTGAT	TGACCTTTGCCCCACTT	-
MoPVvsEXCrbf1.fwd	NR1D1_MOUSE.H11MO.0.A	2	0.00179293	0.641868	0.0834898	13	CTCTGACCTTGAT	CCTTCTGACCCACTTCCCT	-
MoPVvsEXCrbf1.fwd	RXRB_MOUSE.H11MO.0.C	-1	0.00196689	0.704145	0.0858659	10	CTCTGACCTTGAT	TGTGACCTCA	-
MoPVvsEXCrbf1.fwd	VDR_MOUSE.H11MO.0.A	6	0.00271913	0.97345	0.111723	10	CTCTGACCTTGAT	TGAACCCACTGACCCC	-
MoPVvsEXCrbf1.fwd	RORG_MOUSE.H11MO.0.B	-3	0.00371479	1.3299	0.13663	10	CTCTGACCTTGAT	TGACCCACTTTC	-
MoPVvsEXCrbf1.fwd	ESR2_MOUSE.H11MO.0.A	6	0.00371653	1.33052	0.13663	9	CTCTGACCTTGAT	AGGTCACCCTGACCT	+
MoPVvsEXCrbf1.fwd	RARG_MOUSE.H11MO.0.C	9	0.00446369	1.598	0.153163	9	CTCTGACCTTGAT	CCCAGGTCACTCTGACCT	-
MoPVvsEXCrbf1.fwd	NR2C2_MOUSE.H11MO.0.A	4	0.00460481	1.64852	0.153163	9	CTCTGACCTTGAT	TGACCTTTGACCT	-
MoPVvsEXCrbf1.fwd	NKX28_MOUSE.H11MO.0.C	-4	0.00608692	2.17912	0.193258	9	CTCTGACCTTGAT	GTCCTTGAA	-
MoPVvsEXCrbf1.fwd	PRD14_MOUSE.H11MO.0.A	6	0.00822201	2.94348	0.249696	10	CTCTGACCTTGAT	CAAGGTCTCTAACCCT	-
MoPVvsEXCrbf1.fwd	ESR1_MOUSE.H11MO.0.A	6	0.00917434	3.28441	0.267009	9	CTCTGACCTTGAT	AGGTCACCCTGACCT	+
MoPVvsEXCrbf1.fwd	ERR2_MOUSE.H11MO.0.A	1	0.0101769	3.64334	0.28434	13	CTCTGACCTTGAT	AGGATGACCTTGAACTT	-
MoPVvsEXCrbf1.fwd	NR4A1_MOUSE.H11MO.0.B	-3	0.0147578	5.28329	0.381541	9	CTCTGACCTTGAT	TGACCTTTT	-
MoPVvsEXCrbf1.fwd	NR1H3_MOUSE.H11MO.0.A	-2	0.0152946	5.47546	0.381541	11	CTCTGACCTTGAT	CTGACCTTTGACCTC	-
MoPVvsEXCrbf1.fwd	REST_MOUSE.H11MO.0.A	3	0.0164821	5.90059	0.396987	13	CTCTGACCTTGAT	GGGCGCTGTCCATGGTGCTGAA	-
MoPVvsEXCrbf1.fwd	GFI1_MOUSE.H11MO.0.C	1	0.0267374	9.57198	0.602447	9	CTCTGACCTTGAT	GCTGTGATTT	+
MoPVvsEXCrbf2.fwd	DLX3_MOUSE.H11MO.0.C	-2	0.000292813	0.104827	0.0980006	10	ACCCTAATTACAT	GATAATTACA	+
MoPVvsEXCrbf2.fwd	PRRX2_MOUSE.H11MO.0.C	-3	0.00030506	0.109211	0.0980006	7	ACCCTAATTACAT	TTAATTG	+
MoPVvsEXCrbf2.fwd	FOXA2_MOUSE.H11MO.0.A	-1	0.000502193	0.179785	0.0980006	12	ACCCTAATTACAT	CCTTGTTTACTTT	+
MoPVvsEXCrbf2.fwd	BARX1_MOUSE.H11MO.0.C	-2	0.000564507	0.202093	0.0980006	11	ACCCTAATTACAT	TTTAATTGTTTT	+
MoPVvsEXCrbf2.fwd	DLX5_MOUSE.H11MO.0.C	-4	0.000732948	0.262395	0.100822	9	ACCCTAATTACAT	TAATTATAGGT	+
MoPVvsEXCrbf2.fwd	HXB4_MOUSE.H11MO.0.A	-3	0.000871141	0.311869	0.100822	8	ACCCTAATTACAT	TTAATGGC	+
MoPVvsEXCrbf2.fwd	FOXO3_MOUSE.H11MO.0.B	-2	0.00202138	0.723653	0.189383	10	ACCCTAATTACAT	CCTGTTTACA	+
MoPVvsEXCrbf2.fwd	VSX2_MOUSE.H11MO.0.C	-3	0.002549	0.912542	0.189383	10	ACCCTAATTACAT	TTAATTAGCTTC	+
MoPVvsEXCrbf2.fwd	LHX3_MOUSE.H11MO.0.C	-2	0.00268767	0.962186	0.189383	9	ACCCTAATTACAT	GCTAATTAA	+
MoPVvsEXCrbf2.fwd	ALX1_MOUSE.H11MO.0.B	1	0.00272722	0.976345	0.189383	11	ACCCTAATTACAT	TAATTCAATTAT	-
MoPVvsEXCrbf2.fwd	LHX6_MOUSE.H11MO.0.C	-2	0.00312002	1.11697	0.193394	9	ACCCTAATTACAT	GCTGATTAC	+
MoPVvsEXCrbf2.fwd	SP7_MOUSE.H11MO.0.A	-4	0.00336027	1.20298	0.193394	9	ACCCTAATTACAT	TAATTACAGGTTTG	-
MoPVvsEXCrbf2.fwd	FOXK1_MOUSE.H11MO.0.A	-2	0.00362048	1.29613	0.193394	11	ACCCTAATTACAT	CTTGTTTACAT	+
MoPVvsEXCrbf2.fwd	PROP1_MOUSE.H11MO.0.C	-4	0.004147	1.48463	0.205696	9	ACCCTAATTACAT	TAATTGAATTA	+
MoPVvsEXCrbf2.fwd	FOXA3_MOUSE.H11MO.0.A	-2	0.00545123	1.95154	0.243587	11	ACCCTAATTACAT	CTTGTTTACTTTG	+
MoPVvsEXCrbf2.fwd	PDX1_MOUSE.H11MO.0.B	-2	0.00788584	2.82313	0.304181	9	ACCCTAATTACAT	ATTAATGAC	+
MoPVvsEXCrbf2.fwd	NFYC_MOUSE.H11MO.0.B	-1	0.00849619	3.04163	0.304181	12	ACCCTAATTACAT	TTCTGATTGGCTGA	-
MoPVvsEXCrbf2.fwd	NFYB_MOUSE.H11MO.0.A	-1	0.0088916	3.18319	0.304181	12	ACCCTAATTACAT	CTCTGATTGGCTG	-
MoPVvsEXCrbf2.fwd	EVX2_MOUSE.H11MO.0.A	-2	0.00924064	3.30815	0.304181	11	ACCCTAATTACAT	TTTTATTGCTTT	+
MoPVvsEXCrbf2.fwd	NKX31_MOUSE.H11MO.0.C	-2	0.00981915	3.51525	0.304181	11	ACCCTAATTACAT	GTTAAGTGCTTT	+
MoPVvsEXCrbf2.fwd	ISL1_MOUSE.H11MO.0.A	-2	0.0103839	3.71744	0.304181	9	ACCCTAATTACAT	GCTAATGGA	+
MoPVvsEXCrbf2.fwd	NOBOX_MOUSE.H11MO.0.C	-3	0.0103839	3.71744	0.304181	9	ACCCTAATTACAT	CTAATTGGT	+
MoPVvsEXCrbf2.fwd	CDX2_MOUSE.H11MO.0.A	-2	0.0117555	4.20846	0.304181	11	ACCCTAATTACAT	TTTTATGGCCTT	+
MoPVvsEXCrbf2.fwd	LHX2_MOUSE.H11MO.0.A	-2	0.0119854	4.29078	0.304181	10	ACCCTAATTACAT	ACTAATTAAC	-
MoPVvsEXCrbf2.fwd	MYB_MOUSE.H11MO.0.A	-3	0.0124732	4.46541	0.304181	10	ACCCTAATTACAT	CCAACTGCCACC	-
MoPVvsEXCrbf2.fwd	CRX_MOUSE.H11MO.0.A	-2	0.0126655	4.53424	0.304181	11	ACCCTAATTACAT	CCTAATCCTCTTA	-
MoPVvsEXCrbf2.fwd	PBX3_MOUSE.H11MO.0.A	-1	0.0128045	4.584	0.304181	12	ACCCTAATTACAT	CTCTGATTGGCTGG	+
MoPVvsEXCrbf2.fwd	FOXA1_MOUSE.H11MO.0.A	-4	0.0135792	4.86135	0.304181	9	ACCCTAATTACAT	TGTTTACATA	+
MoPVvsEXCrbf2.fwd	FOXO1_MOUSE.H11MO.0.A	-1	0.0144468	5.17195	0.313503	10	ACCCTAATTACAT	GCCTGTTTAC	+
MoPVvsEXCrbf2.fwd	FOXL2_MOUSE.H11MO.0.C	-4	0.0156096	5.58824	0.328472	9	ACCCTAATTACAT	TGTTTACATTT	+
MoPVvsEXCrbf2.fwd	NFYA_MOUSE.H11MO.0.A	-1	0.0170071	6.08853	0.347353	12	ACCCTAATTACAT	TTCTGATTGGCTGA	-
MoPVvsEXCrbf2.fwd	FOXI1_MOUSE.H11MO.0.B	-1	0.019788	7.0841	0.392603	12	ACCCTAATTACAT	CTCTGATTGGTC	+
MoPVvsEXCrbf2.fwd	FOXP2_MOUSE.H11MO.0.A	-3	0.0241095	8.63122	0.465057	9	ACCCTAATTACAT	TTGTTTACT	+
MoPVvsEXCrbf2.fwd	NKX32_MOUSE.H11MO.0.B	-3	0.0248354	8.89106	0.46611	10	ACCCTAATTACAT	TTAAGTGTTT	+
MoPVvsEXCrbf3.fwd	LHX6_MOUSE.H11MO.0.C	-2	0.000228178	0.0816876	0.0941784	9	CTGTAATCAAGGA	GTAATCAGC	-
MoPVvsEXCrbf3.fwd	FOXO3_MOUSE.H11MO.0.B	-1	0.000542377	0.194171	0.0941784	10	CTGTAATCAAGGA	TGTAAACAGG	-
MoPVvsEXCrbf3.fwd	FOXP2_MOUSE.H11MO.0.A	-1	0.000576658	0.206444	0.0941784	9	CTGTAATCAAGGA	AGTAAACAA	-
MoPVvsEXCrbf3.fwd	HXB7_MOUSE.H11MO.0.C	0	0.000591504	0.211758	0.0941784	10	CTGTAATCAAGGA	CATTAATCAA	-
MoPVvsEXCrbf3.fwd	FOXA2_MOUSE.H11MO.0.A	1	0.00066738	0.238922	0.0941784	12	CTGTAATCAAGGA	AAAGTAAACAAGG	-
MoPVvsEXCrbf3.fwd	HXB8_MOUSE.H11MO.0.C	1	0.000902241	0.323002	0.106101	10	CTGTAATCAAGGA	GCATTAATCAA	-
MoPVvsEXCrbf3.fwd	PRRX2_MOUSE.H11MO.0.C	-3	0.00135062	0.483522	0.136139	7	CTGTAATCAAGGA	CAATTAA	-
MoPVvsEXCrbf3.fwd	PBX3_MOUSE.H11MO.0.A	2	0.00158961	0.56908	0.1402	12	CTGTAATCAAGGA	CCAGCCAATCAGAG	-
MoPVvsEXCrbf3.fwd	HXB4_MOUSE.H11MO.0.A	-2	0.00310845	1.11283	0.243697	8	CTGTAATCAAGGA	GCCATTAA	-
MoPVvsEXCrbf3.fwd	CUX2_MOUSE.H11MO.0.C	-3	0.00394926	1.41384	0.278654	10	CTGTAATCAAGGA	AAATCAATGAA	+
MoPVvsEXCrbf3.fwd	FOXA3_MOUSE.H11MO.0.A	2	0.00447124	1.6007	0.284063	11	CTGTAATCAAGGA	CAAAGTAAACAAG	-
MoPVvsEXCrbf3.fwd	NKX21_MOUSE.H11MO.0.A	-2	0.00483112	1.72954	0.284063	10	CTGTAATCAAGGA	CCACTCAAGA	-
MoPVvsEXCrbf3.fwd	FOXK1_MOUSE.H11MO.0.A	0	0.00635791	2.27613	0.337998	11	CTGTAATCAAGGA	ATGTAAACAAG	-
MoPVvsEXCrbf3.fwd	NFYC_MOUSE.H11MO.0.B	2	0.00686905	2.45912	0.337998	12	CTGTAATCAAGGA	TCAGCCAATCAGAA	+
MoPVvsEXCrbf3.fwd	FOXI1_MOUSE.H11MO.0.B	0	0.0071855	2.57241	0.337998	12	CTGTAATCAAGGA	AACCAATCAGAG	-
MoPVvsEXCrbf3.fwd	NOBOX_MOUSE.H11MO.0.C	-1	0.00819127	2.93247	0.361227	9	CTGTAATCAAGGA	ACCAATTAG	-
MoPVvsEXCrbf3.fwd	NFYA_MOUSE.H11MO.0.A	2	0.0105649	3.78223	0.438495	12	CTGTAATCAAGGA	TCAGCCAATCAGAA	+
MoPVvsEXCrbf3.fwd	DLX5_MOUSE.H11MO.0.C	2	0.0120956	4.33024	0.46946	9	CTGTAATCAAGGA	ACCTATAATTA	-
MoPVvsEXCrbf3.fwd	HXA1_MOUSE.H11MO.0.C	0	0.0131749	4.71662	0.46946	10	CTGTAATCAAGGA	CATCCATCAA	-
MoPVvsEXCrbf3.fwd	HNF6_MOUSE.H11MO.0.A	-3	0.0136845	4.89907	0.46946	10	CTGTAATCAAGGA	AAATCAATAAA	-
MoPVvsEXCrbf3.fwd	LHX3_MOUSE.H11MO.0.C	-2	0.0139723	5.00209	0.46946	9	CTGTAATCAAGGA	TTAATTAGC	-
MoPVvsEXCrbf3.fwd	FOXO1_MOUSE.H11MO.0.A	-2	0.0203392	7.28144	0.622743	10	CTGTAATCAAGGA	GTAAACAGGC	-
MoPVvsEXCrbf3.fwd	EVX2_MOUSE.H11MO.0.A	1	0.0213491	7.64297	0.622743	11	CTGTAATCAAGGA	AAAGCAATAAAA	-
MoPVvsEXCrbf3.fwd	NFYB_MOUSE.H11MO.0.A	1	0.0217848	7.79897	0.622743	12	CTGTAATCAAGGA	CAGCCAATCAGAG	+
MoPVvsEXCrbf3.fwd	PROP1_MOUSE.H11MO.0.C	2	0.0220648	7.89921	0.622743	9	CTGTAATCAAGGA	TAATTCAATTA	-
MoPVvsEXCrbf3.fwd	NKX61_MOUSE.H11MO.0.A	-3	0.0236342	8.46105	0.627317	10	CTGTAATCAAGGA	TAATTAAAATCCCATTAAT	-
MoPVvsEXCrbf3.fwd	DLX3_MOUSE.H11MO.0.C	-1	0.0243581	8.72019	0.627317	10	CTGTAATCAAGGA	TGTAATTATC	-
MoPVvsEXCrbf3.fwd	SRY_MOUSE.H11MO.0.B	-3	0.02494	8.92851	0.627317	9	CTGTAATCAAGGA	AAAACAAAA	-
MoPVvsEXCrbf3.fwd	PBX2_MOUSE.H11MO.0.C	1	0.0266722	9.54866	0.627317	13	CTGTAATCAAGGA	CCATCAATCAATTTA	-
MoPVvsEXCrbf3.fwd	FOXD3_MOUSE.H11MO.0.C	4	0.0266722	9.54866	0.627317	11	CTGTAATCAAGGA	TGCTAAGTAAACAAA	-
MoPVvsEXCrbf4.fwd	TFE2_MOUSE.H11MO.0.A	-1	9.79942e-07	0.000350819	0.000686452	11	GCTGCAGCTGTTT	CTGCAGCTGTG	-
MoPVvsEXCrbf4.fwd	SNAI2_MOUSE.H11MO.0.A	-1	0.000123677	0.0442763	0.0323393	11	GCTGCAGCTGTTT	ATGCACCTGCC	-
MoPVvsEXCrbf4.fwd	MYF6_MOUSE.H11MO.0.C	-3	0.000138498	0.0495822	0.0323393	7	GCTGCAGCTGTTT	GCAGCTG	-
MoPVvsEXCrbf4.fwd	ASCL1_MOUSE.H11MO.0.A	-1	0.000242231	0.0867185	0.0424208	12	GCTGCAGCTGTTT	CTGCAGCTGCCCCC	+
MoPVvsEXCrbf4.fwd	LYL1_MOUSE.H11MO.0.A	-3	0.000352317	0.126129	0.0452675	10	GCTGCAGCTGTTT	CCAGCTGTTTCCTG	+
MoPVvsEXCrbf4.fwd	MYOG_MOUSE.H11MO.0.A	-1	0.000387728	0.138807	0.0452675	12	GCTGCAGCTGTTT	CCGCAGCTGTCCC	+
MoPVvsEXCrbf4.fwd	HEN1_MOUSE.H11MO.0.C	3	0.00085256	0.305216	0.0746525	13	GCTGCAGCTGTTT	AGGGACGCAGCTGCTCCCCA	-
MoPVvsEXCrbf4.fwd	ASCL2_MOUSE.H11MO.0.C	-3	0.00117659	0.421218	0.0915781	9	GCTGCAGCTGTTT	CCAGCTGCT	+
MoPVvsEXCrbf4.fwd	ITF2_MOUSE.H11MO.0.B	-2	0.00148726	0.532439	0.0935939	9	GCTGCAGCTGTTT	TGCACCTGG	-
MoPVvsEXCrbf4.fwd	MYOD1_MOUSE.H11MO.0.A	-3	0.00160332	0.573987	0.0935939	10	GCTGCAGCTGTTT	GCAGCTGTTCCTGTC	+
MoPVvsEXCrbf4.fwd	OLIG2_MOUSE.H11MO.0.A	-3	0.00230633	0.825665	0.124276	10	GCTGCAGCTGTTT	CCAGCTGTTTCCCTTCTG	+
MoPVvsEXCrbf4.fwd	PTF1A_MOUSE.H11MO.0.A	-3	0.0028055	1.00437	0.130901	10	GCTGCAGCTGTTT	CCAGCTGCCCCCTTTCCC	+
MoPVvsEXCrbf4.fwd	BHA15_MOUSE.H11MO.0.A	0	0.00298987	1.07037	0.130901	11	GCTGCAGCTGTTT	GCAGCAGCTGG	+
MoPVvsEXCrbf4.fwd	ATOH1_MOUSE.H11MO.0.B	-3	0.00359543	1.28716	0.132558	9	GCTGCAGCTGTTT	CCATCTGCT	-
MoPVvsEXCrbf4.fwd	TGIF1_MOUSE.H11MO.0.A	-4	0.00359543	1.28716	0.132558	9	GCTGCAGCTGTTT	CAGCTGTCA	-
MoPVvsEXCrbf4.fwd	OVOL1_MOUSE.H11MO.0.C	-2	0.00833622	2.98436	0.291977	9	GCTGCAGCTGTTT	TGTAACTGT	+
MoPVvsEXCrbf4.fwd	HTF4_MOUSE.H11MO.0.A	-2	0.0107764	3.85797	0.343133	10	GCTGCAGCTGTTT	AGCAGGTGGG	+
MoPVvsEXCrbf4.fwd	PRDM9_MOUSE.H11MO.0.C	2	0.0121097	4.33525	0.368819	13	GCTGCAGCTGTTT	CAGATGCTGCTGCCATCTT	-
MoPVvsEXCrbf4.fwd	ZFP42_MOUSE.H11MO.0.A	-2	0.0132733	4.75183	0.387415	11	GCTGCAGCTGTTT	GGCAGCCATTTT	+
MoPVvsEXCrbf4.fwd	NDF2_MOUSE.H11MO.0.A	-2	0.0186038	6.66016	0.52128	10	GCTGCAGCTGTTT	GCCATCTGTT	-
MoPVvsEXCrbf4.fwd	SNAI1_MOUSE.H11MO.0.C	-3	0.0219545	7.85972	0.5696	8	GCTGCAGCTGTTT	CCAGGTGG	+
MoPVvsEXCrbf5.fwd	MAF_MOUSE.H11MO.0.A	1	5.23895e-06	0.00187554	0.00348457	13	AACTGCTGACTTC	AATTTGCTGACTCAGCA	+
MoPVvsEXCrbf5.fwd	NFE2_MOUSE.H11MO.0.A	0	1.22551e-05	0.00438733	0.00348457	13	AACTGCTGACTTC	AACTGCTGAGTCAT	-
MoPVvsEXCrbf5.fwd	MAFK_MOUSE.H11MO.0.A	2	1.48482e-05	0.00531565	0.00348457	13	AACTGCTGACTTC	AAAACTGCTGAGTCAGCATT	+
MoPVvsEXCrbf5.fwd	MAFG_MOUSE.H11MO.0.A	2	2.25321e-05	0.00806648	0.00361616	13	AACTGCTGACTTC	AAAATTGCTGACTCAGCA	+
MoPVvsEXCrbf5.fwd	NF2L2_MOUSE.H11MO.0.A	0	2.56815e-05	0.00919397	0.00361616	13	AACTGCTGACTTC	AATTGCTGAGTCAT	-
MoPVvsEXCrbf5.fwd	MAFB_MOUSE.H11MO.0.B	-3	0.000194583	0.0696607	0.0204233	10	AACTGCTGACTTC	TGCTGACTCAG	+
MoPVvsEXCrbf5.fwd	MAFF_MOUSE.H11MO.0.A	1	0.000203061	0.0726957	0.0204233	13	AACTGCTGACTTC	TTTTTGCTGAGTCAGCATTTTT	-
MoPVvsEXCrbf5.fwd	NR2E3_MOUSE.H11MO.0.C	1	0.00085272	0.305274	0.0667055	13	AACTGCTGACTTC	TGACTTTTGACTTT	-
MoPVvsEXCrbf5.fwd	BACH2_MOUSE.H11MO.0.A	-3	0.00145639	0.521387	0.102536	10	AACTGCTGACTTC	TGCTGAGTCAT	+
MoPVvsEXCrbf5.fwd	TBX20_MOUSE.H11MO.0.C	0	0.00286682	1.02632	0.183487	13	AACTGCTGACTTC	AGGTGCTGACAGGT	+
MoPVvsEXCrbf5.fwd	BACH1_MOUSE.H11MO.0.C	-3	0.00369867	1.32412	0.200309	10	AACTGCTGACTTC	TGCTGAGTCATGGT	+
MoPVvsEXCrbf5.fwd	FOXP2_MOUSE.H11MO.0.A	-2	0.00432293	1.54761	0.217394	9	AACTGCTGACTTC	TTGTTTACT	+
MoPVvsEXCrbf5.fwd	PRDM9_MOUSE.H11MO.0.C	4	0.00559896	2.00443	0.246368	13	AACTGCTGACTTC	CAGATGCTGCTGCCATCTT	-
MoPVvsEXCrbf5.fwd	RXRA_MOUSE.H11MO.0.A	8	0.006034	2.16017	0.249893	13	AACTGCTGACTTC	TGACCTTGAACTCCTGACCCT	-
MoPVvsEXCrbf5.fwd	RXRG_MOUSE.H11MO.0.B	8	0.00657912	2.35533	0.257332	13	AACTGCTGACTTC	TGACCTTGAACTCCTGACCCTC	-
MoPVvsEXCrbf5.fwd	FOXA1_MOUSE.H11MO.0.A	-3	0.00806902	2.88871	0.298996	10	AACTGCTGACTTC	TGTTTACATA	+
MoPVvsEXCrbf5.fwd	RARA_MOUSE.H11MO.0.A	8	0.0120143	4.30112	0.391442	12	AACTGCTGACTTC	TGACCTTGAACTTCTGACCC	-
MoPVvsEXCrbf5.fwd	PTF1A_MOUSE.H11MO.0.A	2	0.0122318	4.379	0.391442	13	AACTGCTGACTTC	CCAGCTGCCCCCTTTCCC	+
MoPVvsEXCrbf5.fwd	TGIF1_MOUSE.H11MO.0.A	-2	0.015445	5.52929	0.464217	9	AACTGCTGACTTC	CAGCTGTCA	-
MoPVvsEXCrbf5.fwd	NR1I3_MOUSE.H11MO.0.C	5	0.0162374	5.813	0.464217	13	AACTGCTGACTTC	CTGAACTTTCCTGACCCC	-
MoPVvsEXCrbf5.fwd	ETV2_MOUSE.H11MO.0.A	3	0.016484	5.90129	0.464217	13	AACTGCTGACTTC	CCCACTTCCTGTTTCC	-
MoPVvsEXCrbf5.fwd	HINFP_MOUSE.H11MO.0.C	4	0.0216743	7.75941	0.586908	12	AACTGCTGACTTC	TAACGTCCGCTAGCGC	-
MoPVvsEXCrbf5.fwd	ETS2_MOUSE.H11MO.0.A	-1	0.0262736	9.40595	0.660632	12	AACTGCTGACTTC	TCCTCTTCCTTCC	-
MoPVvsEXCrbf5.fwd	SIX4_MOUSE.H11MO.0.C	1	0.0278143	9.95751	0.675254	13	AACTGCTGACTTC	TGAAACCTGAGACC	+
MoPVvsEXCrbf6.fwd	MEF2D_MOUSE.H11MO.0.A	-1	1.33211e-07	4.76897e-05	5.16628e-05	12	GGGCTATTTATAG	TGCTATTTTTAGCT	+
MoPVvsEXCrbf6.fwd	MEF2C_MOUSE.H11MO.0.A	0	1.46862e-07	5.25768e-05	5.16628e-05	13	GGGCTATTTATAG	GTTCTATTTTTAGCT	+
MoPVvsEXCrbf6.fwd	MEF2A_MOUSE.H11MO.0.A	-1	1.45646e-06	0.000521413	0.000341566	12	GGGCTATTTATAG	TTCTATTTTTAGCA	+
MoPVvsEXCrbf6.fwd	TBP_MOUSE.H11MO.0.A	-3	0.00032907	0.117807	0.0578796	10	GGGCTATTTATAG	CCTTTTATAG	-
MoPVvsEXCrbf6.fwd	CDX1_MOUSE.H11MO.0.C	-5	0.00065751	0.235389	0.0770989	8	GGGCTATTTATAG	ATTTATGT	+
MoPVvsEXCrbf6.fwd	FOXJ2_MOUSE.H11MO.0.C	0	0.00168056	0.601642	0.168909	10	GGGCTATTTATAG	TGTTTATTTA	+
MoPVvsEXCrbf6.fwd	DLX5_MOUSE.H11MO.0.C	-4	0.00212653	0.761297	0.187016	9	GGGCTATTTATAG	TAATTATAGGT	+
MoPVvsEXCrbf6.fwd	FOXO1_MOUSE.H11MO.0.A	-1	0.00336708	1.20542	0.214293	10	GGGCTATTTATAG	GCCTGTTTAC	+
MoPVvsEXCrbf6.fwd	FOXJ3_MOUSE.H11MO.0.A	1	0.00355961	1.27434	0.214293	12	GGGCTATTTATAG	TTGTTTATTTTTT	+
MoPVvsEXCrbf6.fwd	HXA9_MOUSE.H11MO.0.B	-2	0.00636709	2.27942	0.344583	11	GGGCTATTTATAG	ATGATTTATGG	+
MoPVvsEXCrbf6.fwd	CDX4_MOUSE.H11MO.0.A	-3	0.00746026	2.67077	0.360522	10	GGGCTATTTATAG	TGATTTATGGCC	+
MoPVvsEXCrbf6.fwd	NKX61_MOUSE.H11MO.0.A	6	0.00807293	2.89011	0.360522	13	GGGCTATTTATAG	ATTAATGGGATTTTAATTA	+
MoPVvsEXCrbf6.fwd	SP7_MOUSE.H11MO.0.A	-4	0.00891251	3.19068	0.360522	9	GGGCTATTTATAG	TAATTACAGGTTTG	-
MoPVvsEXCrbf6.fwd	SRF_MOUSE.H11MO.0.A	1	0.0089675	3.21036	0.360522	13	GGGCTATTTATAG	ATGGCCAAATAAGGAAA	-
MoPVvsEXCrbf6.fwd	EVX1_MOUSE.H11MO.0.C	-3	0.00922374	3.3021	0.360522	10	GGGCTATTTATAG	TGATTTATGGCCT	+
MoPVvsEXCrbf6.fwd	HNF1A_MOUSE.H11MO.0.A	0	0.0103122	3.69178	0.381853	13	GGGCTATTTATAG	GGTTAATTATTAACC	-
MoPVvsEXCrbf6.fwd	CUX1_MOUSE.H11MO.0.C	1	0.0118115	4.22853	0.415502	13	GGGCTATTTATAG	AGGGGGATCGATGG	+
MoPVvsEXCrbf6.fwd	VSX2_MOUSE.H11MO.0.C	1	0.0125223	4.48299	0.419529	11	GGGCTATTTATAG	GAAGCTAATTAA	-
MoPVvsEXCrbf6.fwd	FOXO3_MOUSE.H11MO.0.B	-2	0.0146055	5.22876	0.4427	10	GGGCTATTTATAG	CCTGTTTACA	+
MoPVvsEXCrbf6.fwd	MEIS1_MOUSE.H11MO.0.A	-2	0.0148209	5.30589	0.4427	11	GGGCTATTTATAG	ATGATTTATGGC	+
MoPVvsEXCrbf6.fwd	FOXP2_MOUSE.H11MO.0.A	-3	0.0153292	5.48786	0.4427	9	GGGCTATTTATAG	TTGTTTACT	+
MoPVvsEXCrbf6.fwd	FOXL2_MOUSE.H11MO.0.C	0	0.0196166	7.02274	0.503127	11	GGGCTATTTATAG	TGTTTACATTT	+
MoPVvsEXCrbf6.fwd	PRRX2_MOUSE.H11MO.0.C	-3	0.0206862	7.40565	0.503127	7	GGGCTATTTATAG	TTAATTG	+
MoPVvsEXCrbf6.fwd	RUNX3_MOUSE.H11MO.0.A	-1	0.0217966	7.8032	0.503127	12	GGGCTATTTATAG	GGCTGTGGTTTG	+
MoPVvsEXCrbf6.fwd	FOXK1_MOUSE.H11MO.0.A	-2	0.0219336	7.85225	0.503127	11	GGGCTATTTATAG	CTTGTTTACAT	+
MoPVvsEXCrbf6.fwd	BRAC_MOUSE.H11MO.0.B	13	0.0221688	7.93643	0.503127	12	GGGCTATTTATAG	TTTTCCATATGTCTGTCAATTCATG	+
MoPVvsEXCrbf6.fwd	FOXQ1_MOUSE.H11MO.0.C	3	0.0242757	8.6907	0.533727	9	GGGCTATTTATAG	TATTGTTTATTT	+
MoPVvsEXCrbf6.fwd	SOX5_MOUSE.H11MO.0.C	-4	0.0274706	9.83447	0.585667	8	GGGCTATTTATAG	TATTGTTA	+
MoPVvsEXCrbf7.fwd	LHX6_MOUSE.H11MO.0.C	-1	0.000305129	0.109236	0.217117	9	TGTAATCAGCACA	GTAATCAGC	-
MoPVvsEXCrbf7.fwd	FOXO1_MOUSE.H11MO.0.A	-1	0.000997132	0.356973	0.232284	10	TGTAATCAGCACA	GTAAACAGGC	-
MoPVvsEXCrbf7.fwd	FOXO3_MOUSE.H11MO.0.B	0	0.00111154	0.397931	0.232284	10	TGTAATCAGCACA	TGTAAACAGG	-
MoPVvsEXCrbf7.fwd	DLX3_MOUSE.H11MO.0.C	0	0.00130578	0.467467	0.232284	10	TGTAATCAGCACA	TGTAATTATC	-
MoPVvsEXCrbf7.fwd	FOXP2_MOUSE.H11MO.0.A	0	0.00225385	0.806877	0.320748	9	TGTAATCAGCACA	AGTAAACAA	-
MoPVvsEXCrbf7.fwd	FOXK1_MOUSE.H11MO.0.A	1	0.00291063	1.04201	0.345181	10	TGTAATCAGCACA	ATGTAAACAAG	-
MoPVvsEXCrbf7.fwd	LHX3_MOUSE.H11MO.0.C	-1	0.0039816	1.42541	0.404734	9	TGTAATCAGCACA	TTAATTAGC	-
MoPVvsEXCrbf7.fwd	FOXA2_MOUSE.H11MO.0.A	2	0.00493104	1.76531	0.43859	11	TGTAATCAGCACA	AAAGTAAACAAGG	-
MoPVvsEXCrbf7.fwd	TBX20_MOUSE.H11MO.0.C	0	0.010215	3.65696	0.791199	13	TGTAATCAGCACA	ACCTGTCAGCACCT	-
MoPVvsEXCrbf7.fwd	ATF2_MOUSE.H11MO.0.A	1	0.0111192	3.98069	0.791199	10	TGTAATCAGCACA	ATGACGTCATC	-
MoPVvsEXCrbf7.fwd	THA_MOUSE.H11MO.0.C	0	0.0136461	4.88529	0.87107	13	TGTAATCAGCACA	TGTCCTCAGATGACCTC	-
MoPVvsEXCrbf7.fwd	FOXA1_MOUSE.H11MO.0.A	2	0.020151	7.21405	0.87107	8	TGTAATCAGCACA	TATGTAAACA	-
MoPVvsEXCrbf7.fwd	FOXJ3_MOUSE.H11MO.0.A	1	0.0203681	7.29179	0.87107	12	TGTAATCAGCACA	AAAAAATAAACAA	-
MoPVvsEXCrbf7.fwd	SIX2_MOUSE.H11MO.0.A	0	0.0214123	7.66559	0.87107	13	TGTAATCAGCACA	TGAAACCTGATACC	+
MoPVvsEXCrbf7.fwd	REST_MOUSE.H11MO.0.A	-4	0.0221172	7.91796	0.87107	9	TGTAATCAGCACA	TTCAGCACCATGGACAGCGCCC	+
MoPVvsEXCrbf7.fwd	CLOCK_MOUSE.H11MO.0.C	1	0.0230805	8.2628	0.87107	13	TGTAATCAGCACA	CAGACACGTGAACA	+
MoPVvsEXCrbf7.fwd	MEF2C_MOUSE.H11MO.0.A	3	0.0232527	8.32446	0.87107	12	TGTAATCAGCACA	AGCTAAAAATAGAAC	-
MoPVvsEXCrbf7.fwd	FOXL2_MOUSE.H11MO.0.C	3	0.0232641	8.32854	0.87107	8	TGTAATCAGCACA	AAATGTAAACA	-
MoPVvsEXCrbf7.fwd	HXB4_MOUSE.H11MO.0.A	-1	0.0273284	9.78358	0.87107	8	TGTAATCAGCACA	GCCATTAA	-
MoPVvsEXCrbf7.fwd	FOXA3_MOUSE.H11MO.0.A	3	0.0275074	9.84763	0.87107	10	TGTAATCAGCACA	CAAAGTAAACAAG	-
MoPVvsEXCrbf7.fwd	FOXO4_MOUSE.H11MO.0.C	-3	0.0277716	9.94224	0.87107	9	TGTAATCAGCACA	AATAAACAA	-
MoPVvsEXCrbf8.fwd	PRDM9_MOUSE.H11MO.0.C	4	0.00131178	0.469616	0.939231	13	AGGCTGCAGTTCC	AAGATGGCAGCAGCATCTG	+
MoPVvsEXCrbf8.fwd	MAFG_MOUSE.H11MO.0.A	5	0.00623528	2.23223	0.999995	13	AGGCTGCAGTTCC	TGCTGAGTCAGCAATTTT	-
MoPVvsEXCrbf8.fwd	MAF_MOUSE.H11MO.0.A	5	0.00751121	2.68901	0.999995	12	AGGCTGCAGTTCC	TGCTGAGTCAGCAAATT	-
MoPVvsEXCrbf8.fwd	MAFK_MOUSE.H11MO.0.A	7	0.00820637	2.93788	0.999995	13	AGGCTGCAGTTCC	AATGCTGACTCAGCAGTTTT	-
MoPVvsEXCrbf8.fwd	ZFP57_MOUSE.H11MO.0.B	1	0.00857288	3.06909	0.999995	9	AGGCTGCAGTTCC	TTTGCCGCAG	-
MoPVvsEXCrbf8.fwd	ASCL1_MOUSE.H11MO.0.A	-3	0.0101106	3.61961	0.999995	10	AGGCTGCAGTTCC	CTGCAGCTGCCCCC	+
MoPVvsEXCrbf8.fwd	HEN1_MOUSE.H11MO.0.C	1	0.010485	3.75362	0.999995	13	AGGCTGCAGTTCC	AGGGACGCAGCTGCTCCCCA	-
MoPVvsEXCrbf8.fwd	MYOD1_MOUSE.H11MO.0.A	-2	0.0136755	4.89581	0.999995	11	AGGCTGCAGTTCC	GCAGCTGTTCCTGTC	+
MoPVvsEXCrbf8.fwd	IRF4_MOUSE.H11MO.0.A	-1	0.0137296	4.91519	0.999995	12	AGGCTGCAGTTCC	AGTTTCAGTTCCTCTTTT	-
MoPVvsEXCrbf8.fwd	ZN143_MOUSE.H11MO.0.A	0	0.0167634	6.0013	0.999995	13	AGGCTGCAGTTCC	GGACTACAATTCCCAGCATGCC	-
MoPVvsEXCrbf8.fwd	THA11_MOUSE.H11MO.0.B	0	0.0199458	7.14061	0.999995	13	AGGCTGCAGTTCC	GAACTACAACTCCCAGCATGCC	-
snPVvsEXC1.fwd	ERR3_MOUSE.H11MO.0.C	-2	3.35041e-07	0.000119945	0.000234019	10	CTGTGACCTTGAT	GTGACCTTGA	-
snPVvsEXC1.fwd	RORA_MOUSE.H11MO.0.C	0	7.17515e-05	0.025687	0.0250584	13	CTGTGACCTTGAT	CCCTGACCTAGTT	-
snPVvsEXC1.fwd	NR4A2_MOUSE.H11MO.0.C	-2	0.000141853	0.0507835	0.0330271	9	CTGTGACCTTGAT	GTGACCTTT	-
snPVvsEXC1.fwd	NR5A2_MOUSE.H11MO.0.A	-3	0.000498619	0.178506	0.0659878	10	CTGTGACCTTGAT	TGACCTTGAAC	-
snPVvsEXC1.fwd	ERR1_MOUSE.H11MO.0.A	-3	0.000534878	0.191486	0.0659878	10	CTGTGACCTTGAT	TGACCTTGACCT	-
snPVvsEXC1.fwd	RARA_MOUSE.H11MO.0.A	-3	0.000566843	0.20293	0.0659878	10	CTGTGACCTTGAT	TGACCTTGAACTTCTGACCC	-
snPVvsEXC1.fwd	ERR2_MOUSE.H11MO.0.A	1	0.000887048	0.317563	0.0735047	13	CTGTGACCTTGAT	AGGATGACCTTGAACTT	-
snPVvsEXC1.fwd	COT1_MOUSE.H11MO.0.B	-3	0.000905337	0.324111	0.0735047	9	CTGTGACCTTGAT	TGACCTTTG	-
snPVvsEXC1.fwd	NR1D2_MOUSE.H11MO.0.A	2	0.000954992	0.341887	0.0735047	13	CTGTGACCTTGAT	CCCTCTGACCCACTTCCCC	-
snPVvsEXC1.fwd	STF1_MOUSE.H11MO.0.B	-3	0.00105236	0.376744	0.0735047	10	CTGTGACCTTGAT	TGGCCTTGAGC	-
snPVvsEXC1.fwd	RXRG_MOUSE.H11MO.0.B	-3	0.00130715	0.467961	0.0830015	10	CTGTGACCTTGAT	TGACCTTGAACTCCTGACCCTC	-
snPVvsEXC1.fwd	RXRA_MOUSE.H11MO.0.A	-3	0.00156363	0.55978	0.0910135	10	CTGTGACCTTGAT	TGACCTTGAACTCCTGACCCT	-
snPVvsEXC1.fwd	PPARA_MOUSE.H11MO.0.A	4	0.00174018	0.622986	0.0934984	13	CTGTGACCTTGAT	TGACCTTTGACCTAGTT	-
snPVvsEXC1.fwd	RXRB_MOUSE.H11MO.0.C	-1	0.00190271	0.681169	0.0947331	10	CTGTGACCTTGAT	TGTGACCTCA	-
snPVvsEXC1.fwd	VDR_MOUSE.H11MO.0.A	6	0.00203442	0.728323	0.0947331	10	CTGTGACCTTGAT	TGAACCCACTGACCCC	-
snPVvsEXC1.fwd	NKX28_MOUSE.H11MO.0.C	-4	0.00332607	1.19073	0.145199	9	CTGTGACCTTGAT	GTCCTTGAA	-
snPVvsEXC1.fwd	RORG_MOUSE.H11MO.0.B	-3	0.00467073	1.67212	0.185902	10	CTGTGACCTTGAT	TGACCCACTTTC	-
snPVvsEXC1.fwd	PPARG_MOUSE.H11MO.0.A	4	0.00479076	1.71509	0.185902	13	CTGTGACCTTGAT	TGACCTTTGCCCCACTT	-
snPVvsEXC1.fwd	RARG_MOUSE.H11MO.0.C	6	0.00742601	2.65851	0.272995	12	CTGTGACCTTGAT	AGGTCAGAGTGACCTGGG	+
snPVvsEXC1.fwd	COT2_MOUSE.H11MO.0.A	0	0.00830151	2.97194	0.277681	13	CTGTGACCTTGAT	CTCTGACCTTTGG	-
snPVvsEXC1.fwd	NR2C2_MOUSE.H11MO.0.A	4	0.00879736	3.14945	0.279307	9	CTGTGACCTTGAT	TGACCTTTGACCT	-
snPVvsEXC1.fwd	GFI1_MOUSE.H11MO.0.C	1	0.0102439	3.66733	0.299918	9	CTGTGACCTTGAT	GCTGTGATTT	+
snPVvsEXC1.fwd	ESR1_MOUSE.H11MO.0.A	6	0.0103053	3.68931	0.299918	9	CTGTGACCTTGAT	AGGTCAGGGTGACCT	-
snPVvsEXC1.fwd	ESR2_MOUSE.H11MO.0.A	6	0.0109041	3.90366	0.30465	9	CTGTGACCTTGAT	AGGTCACCCTGACCT	+
snPVvsEXC1.fwd	NR4A1_MOUSE.H11MO.0.B	-3	0.0124812	4.46826	0.32173	9	CTGTGACCTTGAT	TGACCTTTT	-
snPVvsEXC1.fwd	NR1D1_MOUSE.H11MO.0.A	2	0.0125392	4.48903	0.32173	13	CTGTGACCTTGAT	CCTTCTGACCCACTTCCCT	-
snPVvsEXC1.fwd	SMAD3_MOUSE.H11MO.0.B	2	0.017085	6.11643	0.411499	10	CTGTGACCTTGAT	CTCTGTCACCTG	+
snPVvsEXC1.fwd	PRD14_MOUSE.H11MO.0.A	5	0.0181538	6.49905	0.422666	11	CTGTGACCTTGAT	AGGGTTAGAGACCTTG	+
snPVvsEXC1.fwd	NR1H4_MOUSE.H11MO.0.A	5	0.020613	7.37947	0.452915	13	CTGTGACCTTGAT	GGGGTCAATGACCCCGAGG	+
snPVvsEXC1.fwd	GFI1B_MOUSE.H11MO.0.A	1	0.0211054	7.55573	0.452915	9	CTGTGACCTTGAT	GCTGTGATTT	+
snPVvsEXC1.fwd	TF7L2_MOUSE.H11MO.0.A	2	0.0213982	7.66057	0.452915	11	CTGTGACCTTGAT	CCCTTTGATGTGG	+
snPVvsEXC1.fwd	REST_MOUSE.H11MO.0.A	3	0.0259442	9.28803	0.532984	13	CTGTGACCTTGAT	GGGCGCTGTCCATGGTGCTGAA	-
snPVvsEXC2.fwd	DLX3_MOUSE.H11MO.0.C	-2	6.55422e-05	0.0234641	0.0462768	10	ATCCTAATTACAT	GATAATTACA	+
snPVvsEXC2.fwd	PRRX2_MOUSE.H11MO.0.C	-3	0.000208747	0.0747316	0.050302	7	ATCCTAATTACAT	TTAATTG	+
snPVvsEXC2.fwd	DLX5_MOUSE.H11MO.0.C	-4	0.000213729	0.0765151	0.050302	9	ATCCTAATTACAT	TAATTATAGGT	+
snPVvsEXC2.fwd	HXB4_MOUSE.H11MO.0.A	-3	0.000471779	0.168897	0.0832761	8	ATCCTAATTACAT	TTAATGGC	+
snPVvsEXC2.fwd	FOXA2_MOUSE.H11MO.0.A	-1	0.000993154	0.355549	0.1154	12	ATCCTAATTACAT	CCTTGTTTACTTT	+
snPVvsEXC2.fwd	SP7_MOUSE.H11MO.0.A	-4	0.00116863	0.41837	0.1154	9	ATCCTAATTACAT	TAATTACAGGTTTG	-
snPVvsEXC2.fwd	LHX6_MOUSE.H11MO.0.C	-2	0.00136493	0.488644	0.1154	9	ATCCTAATTACAT	GCTGATTAC	+
snPVvsEXC2.fwd	LHX3_MOUSE.H11MO.0.C	-2	0.00159806	0.572107	0.1154	9	ATCCTAATTACAT	GCTAATTAA	+
snPVvsEXC2.fwd	NOBOX_MOUSE.H11MO.0.C	-3	0.00159806	0.572107	0.1154	9	ATCCTAATTACAT	CTAATTGGT	+
snPVvsEXC2.fwd	BARX1_MOUSE.H11MO.0.C	-2	0.00163441	0.58512	0.1154	11	ATCCTAATTACAT	TTTAATTGTTTT	+
snPVvsEXC2.fwd	FOXO3_MOUSE.H11MO.0.B	-2	0.00182949	0.654956	0.11743	10	ATCCTAATTACAT	CCTGTTTACA	+
snPVvsEXC2.fwd	ISL1_MOUSE.H11MO.0.A	-2	0.00426195	1.52578	0.250767	9	ATCCTAATTACAT	GCTAATGGA	+
snPVvsEXC2.fwd	FOXO1_MOUSE.H11MO.0.A	-1	0.00603619	2.16096	0.325196	10	ATCCTAATTACAT	GCCTGTTTAC	+
snPVvsEXC2.fwd	ALX1_MOUSE.H11MO.0.B	1	0.0064481	2.30842	0.325196	11	ATCCTAATTACAT	TAATTCAATTAT	-
snPVvsEXC2.fwd	FOXA3_MOUSE.H11MO.0.A	-2	0.00701948	2.51297	0.330412	11	ATCCTAATTACAT	CTTGTTTACTTTG	+
snPVvsEXC2.fwd	PDX1_MOUSE.H11MO.0.B	-2	0.00754014	2.69937	0.332737	9	ATCCTAATTACAT	ATTAATGAC	+
snPVvsEXC2.fwd	FOXK1_MOUSE.H11MO.0.A	-2	0.0101304	3.62669	0.376458	11	ATCCTAATTACAT	CTTGTTTACAT	+
snPVvsEXC2.fwd	PROP1_MOUSE.H11MO.0.C	-4	0.0101304	3.62669	0.376458	9	ATCCTAATTACAT	TAATTGAATTA	+
snPVvsEXC2.fwd	FOXP2_MOUSE.H11MO.0.A	-3	0.0113116	4.04954	0.399332	9	ATCCTAATTACAT	TTGTTTACT	+
snPVvsEXC2.fwd	NKX31_MOUSE.H11MO.0.C	-2	0.0132214	4.73326	0.444529	11	ATCCTAATTACAT	GTTAAGTGCTTT	+
snPVvsEXC2.fwd	VSX2_MOUSE.H11MO.0.C	1	0.0166386	5.95662	0.532471	11	ATCCTAATTACAT	GAAGCTAATTAA	-
snPVvsEXC2.fwd	PO2F2_MOUSE.H11MO.0.B	2	0.018381	6.58041	0.540755	9	ATCCTAATTACAT	ATATGCAAATG	+
snPVvsEXC2.fwd	TEAD2_MOUSE.H11MO.0.C	-2	0.0197111	7.05658	0.556689	11	ATCCTAATTACAT	CCACATTCCAGG	+
snPVvsEXC2.fwd	EVX2_MOUSE.H11MO.0.A	-2	0.0232858	8.33631	0.594596	11	ATCCTAATTACAT	TTTTATTGCTTT	+
snPVvsEXC2.fwd	LHX2_MOUSE.H11MO.0.A	-2	0.0237988	8.51997	0.594596	10	ATCCTAATTACAT	ACTAATTAAC	-
snPVvsEXC2.fwd	GATA2_MOUSE.H11MO.0.A	-1	0.025827	9.24606	0.594596	11	ATCCTAATTACAT	TTCTTATCTGT	-
snPVvsEXC2.fwd	STAT6_MOUSE.H11MO.0.A	1	0.0261061	9.34597	0.594596	13	ATCCTAATTACAT	TTTCCTGAGAACTG	+
snPVvsEXC3.fwd	MEF2C_MOUSE.H11MO.0.A	2	1.83429e-10	6.56677e-08	1.04771e-07	13	CTATAAATAGCCC	AGCTAAAAATAGAAC	-
snPVvsEXC3.fwd	MEF2D_MOUSE.H11MO.0.A	2	2.98056e-10	1.06704e-07	1.04771e-07	12	CTATAAATAGCCC	AGCTAAAAATAGCA	-
snPVvsEXC3.fwd	MEF2A_MOUSE.H11MO.0.A	2	6.31755e-09	2.26168e-06	1.48048e-06	12	CTATAAATAGCCC	TGCTAAAAATAGAA	-
snPVvsEXC3.fwd	FOXJ3_MOUSE.H11MO.0.A	-1	0.000482585	0.172766	0.084818	12	CTATAAATAGCCC	AAAAAATAAACAA	-
snPVvsEXC3.fwd	FOXJ2_MOUSE.H11MO.0.C	-3	0.000805402	0.288334	0.097255	10	CTATAAATAGCCC	TAAATAAACA	-
snPVvsEXC3.fwd	CDX1_MOUSE.H11MO.0.C	0	0.000853338	0.305495	0.097255	8	CTATAAATAGCCC	ACATAAAT	-
snPVvsEXC3.fwd	TBP_MOUSE.H11MO.0.A	0	0.00174868	0.626027	0.153672	10	CTATAAATAGCCC	CTATAAAAGG	+
snPVvsEXC3.fwd	HNF1A_MOUSE.H11MO.0.A	2	0.00271012	0.970222	0.211699	13	CTATAAATAGCCC	GGTTAATAATTAACC	+
snPVvsEXC3.fwd	FOXL2_MOUSE.H11MO.0.C	-2	0.0047613	1.70454	0.257487	11	CTATAAATAGCCC	AAATGTAAACA	-
snPVvsEXC3.fwd	DLX5_MOUSE.H11MO.0.C	2	0.0047613	1.70454	0.257487	9	CTATAAATAGCCC	ACCTATAATTA	-
snPVvsEXC3.fwd	HXA9_MOUSE.H11MO.0.B	0	0.00617907	2.21211	0.310291	11	CTATAAATAGCCC	CCATAAATCAT	-
snPVvsEXC3.fwd	SRF_MOUSE.H11MO.0.A	4	0.00691146	2.4743	0.315314	13	CTATAAATAGCCC	ATGGCCAAATAAGGAAA	-
snPVvsEXC3.fwd	FOXO1_MOUSE.H11MO.0.A	-2	0.00759079	2.7175	0.315314	10	CTATAAATAGCCC	GTAAACAGGC	-
snPVvsEXC3.fwd	EVX1_MOUSE.H11MO.0.C	3	0.00762463	2.72962	0.315314	10	CTATAAATAGCCC	AGGCCATAAATCA	-
snPVvsEXC3.fwd	SOX5_MOUSE.H11MO.0.C	-1	0.00811932	2.90672	0.317118	8	CTATAAATAGCCC	TAACAATA	-
snPVvsEXC3.fwd	CDX4_MOUSE.H11MO.0.A	2	0.00863785	3.09235	0.319614	10	CTATAAATAGCCC	GGCCATAAATCA	-
snPVvsEXC3.fwd	FOXQ1_MOUSE.H11MO.0.C	-4	0.00975767	3.49325	0.342997	9	CTATAAATAGCCC	AAATAAACAATT	-
snPVvsEXC3.fwd	VSX2_MOUSE.H11MO.0.C	-2	0.0124029	4.44025	0.413005	11	CTATAAATAGCCC	TTAATTAGCTTC	+
snPVvsEXC3.fwd	MEIS1_MOUSE.H11MO.0.A	1	0.0131592	4.71099	0.413005	11	CTATAAATAGCCC	GCCATAAATCAT	-
snPVvsEXC3.fwd	HNF1B_MOUSE.H11MO.0.A	2	0.0156252	5.59384	0.420991	13	CTATAAATAGCCC	AGTTAATGATTAACT	+
snPVvsEXC3.fwd	NKX61_MOUSE.H11MO.0.A	0	0.0157216	5.62832	0.420991	13	CTATAAATAGCCC	TAATTAAAATCCCATTAAT	-
snPVvsEXC3.fwd	SOX2_MOUSE.H11MO.0.A	5	0.0159951	5.72624	0.420991	11	CTATAAATAGCCC	TTTGCATAACAAAGGA	-
snPVvsEXC3.fwd	FOXA3_MOUSE.H11MO.0.A	-2	0.016526	5.91633	0.420991	11	CTATAAATAGCCC	CAAAGTAAACAAG	-
snPVvsEXC3.fwd	SP7_MOUSE.H11MO.0.A	5	0.016767	6.0026	0.420991	9	CTATAAATAGCCC	CAAACCTGTAATTA	+
snPVvsEXC3.fwd	NANOG_MOUSE.H11MO.0.A	6	0.0202561	7.25169	0.483731	11	CTATAAATAGCCC	ATTTGCATAACAAAGGA	-
snPVvsEXC3.fwd	FOXA1_MOUSE.H11MO.0.A	-3	0.020642	7.38983	0.483731	10	CTATAAATAGCCC	TATGTAAACA	-
snPVvsEXC3.fwd	RUNX3_MOUSE.H11MO.0.A	0	0.0221235	7.92022	0.501726	12	CTATAAATAGCCC	CAAACCACAGCC	-
snPVvsEXC3.fwd	FOXO3_MOUSE.H11MO.0.B	-1	0.0246065	8.80912	0.52178	10	CTATAAATAGCCC	TGTAAACAGG	-
snPVvsEXC3.fwd	HXA10_MOUSE.H11MO.0.C	0	0.0247531	8.86163	0.52178	12	CTATAAATAGCCC	TCATAAATCATC	-
snPVvsEXC3.fwd	AIRE_MOUSE.H11MO.0.C	3	0.0252344	9.0339	0.52178	13	CTATAAATAGCCC	TTAACCAATATAACCAAT	-
snPVvsEXC3.fwd	BRAC_MOUSE.H11MO.0.B	-1	0.0260797	9.33655	0.523853	12	CTATAAATAGCCC	CATGAATTGACAGACATATGGAAAA	-
snPVvsEXC4.fwd	FOXA2_MOUSE.H11MO.0.A	0	2.39808e-05	0.00858513	0.0167623	13	ACTGTAATCAAGG	AAAGTAAACAAGG	-
snPVvsEXC4.fwd	LHX6_MOUSE.H11MO.0.C	-3	9.90963e-05	0.0354765	0.0312315	9	ACTGTAATCAAGG	GTAATCAGC	-
snPVvsEXC4.fwd	FOXO3_MOUSE.H11MO.0.B	-2	0.000134043	0.0479873	0.0312315	10	ACTGTAATCAAGG	TGTAAACAGG	-
snPVvsEXC4.fwd	FOXA3_MOUSE.H11MO.0.A	1	0.000275225	0.0985306	0.0478711	12	ACTGTAATCAAGG	CAAAGTAAACAAG	-
snPVvsEXC4.fwd	FOXP2_MOUSE.H11MO.0.A	-2	0.000358716	0.12842	0.0478711	9	ACTGTAATCAAGG	AGTAAACAA	-
snPVvsEXC4.fwd	HXB7_MOUSE.H11MO.0.C	-1	0.000410917	0.147108	0.0478711	10	ACTGTAATCAAGG	CATTAATCAA	-
snPVvsEXC4.fwd	PRRX2_MOUSE.H11MO.0.C	-4	0.00145501	0.520893	0.143759	7	ACTGTAATCAAGG	CAATTAA	-
snPVvsEXC4.fwd	FOXK1_MOUSE.H11MO.0.A	-1	0.00181013	0.648026	0.143759	11	ACTGTAATCAAGG	ATGTAAACAAG	-
snPVvsEXC4.fwd	HXB8_MOUSE.H11MO.0.C	0	0.00194658	0.696875	0.143759	11	ACTGTAATCAAGG	GCATTAATCAA	-
snPVvsEXC4.fwd	NKX21_MOUSE.H11MO.0.A	-3	0.00205667	0.736288	0.143759	10	ACTGTAATCAAGG	CCACTCAAGA	-
snPVvsEXC4.fwd	HXB4_MOUSE.H11MO.0.A	-3	0.00249326	0.892585	0.154531	8	ACTGTAATCAAGG	GCCATTAA	-
snPVvsEXC4.fwd	EVX2_MOUSE.H11MO.0.A	0	0.00265292	0.949747	0.154531	12	ACTGTAATCAAGG	AAAGCAATAAAA	-
snPVvsEXC4.fwd	FOXA1_MOUSE.H11MO.0.A	0	0.00318672	1.14085	0.171345	10	ACTGTAATCAAGG	TATGTAAACA	-
snPVvsEXC4.fwd	FOXL2_MOUSE.H11MO.0.C	1	0.00392081	1.40365	0.184828	10	ACTGTAATCAAGG	AAATGTAAACA	-
snPVvsEXC4.fwd	FOXD3_MOUSE.H11MO.0.C	3	0.00396632	1.41994	0.184828	12	ACTGTAATCAAGG	TGCTAAGTAAACAAA	-
snPVvsEXC4.fwd	PBX3_MOUSE.H11MO.0.A	1	0.0054068	1.93563	0.213549	13	ACTGTAATCAAGG	CCAGCCAATCAGAG	-
snPVvsEXC4.fwd	FOXI1_MOUSE.H11MO.0.B	-1	0.00549919	1.96871	0.213549	12	ACTGTAATCAAGG	AACCAATCAGAG	-
snPVvsEXC4.fwd	FOXM1_MOUSE.H11MO.0.B	2	0.00549919	1.96871	0.213549	10	ACTGTAATCAAGG	GCAAAGCAAACA	-
snPVvsEXC4.fwd	CDX2_MOUSE.H11MO.0.A	0	0.00586206	2.09862	0.215659	12	ACTGTAATCAAGG	AAGGCCATAAAA	-
snPVvsEXC4.fwd	NOBOX_MOUSE.H11MO.0.C	-2	0.00731971	2.62046	0.25582	9	ACTGTAATCAAGG	ACCAATTAG	-
snPVvsEXC4.fwd	HXA1_MOUSE.H11MO.0.C	-1	0.00785799	2.81316	0.256061	10	ACTGTAATCAAGG	CATCCATCAA	-
snPVvsEXC4.fwd	PROP1_MOUSE.H11MO.0.C	1	0.00805927	2.88522	0.256061	10	ACTGTAATCAAGG	TAATTCAATTA	-
snPVvsEXC4.fwd	FOXO1_MOUSE.H11MO.0.A	-3	0.00958255	3.43055	0.288305	10	ACTGTAATCAAGG	GTAAACAGGC	-
snPVvsEXC4.fwd	PO2F1_MOUSE.H11MO.0.C	5	0.00989903	3.54385	0.288305	11	ACTGTAATCAAGG	AATCGAATGCAAATAA	+
snPVvsEXC4.fwd	LHX3_MOUSE.H11MO.0.C	-3	0.0103462	3.70393	0.289275	9	ACTGTAATCAAGG	TTAATTAGC	-
snPVvsEXC4.fwd	DLX3_MOUSE.H11MO.0.C	-2	0.0116385	4.16658	0.312892	10	ACTGTAATCAAGG	TGTAATTATC	-
snPVvsEXC4.fwd	FOXC1_MOUSE.H11MO.0.C	2	0.0127706	4.57186	0.32546	13	ACTGTAATCAAGG	CTTAAGTAAACAATG	-
snPVvsEXC4.fwd	BARX1_MOUSE.H11MO.0.C	0	0.0130372	4.66733	0.32546	12	ACTGTAATCAAGG	AAAACAATTAAA	-
snPVvsEXC4.fwd	NFYC_MOUSE.H11MO.0.B	1	0.0150477	5.38708	0.362697	13	ACTGTAATCAAGG	TCAGCCAATCAGAA	+
snPVvsEXC4.fwd	ALX1_MOUSE.H11MO.0.B	1	0.0185175	6.62926	0.42592	11	ACTGTAATCAAGG	TAATTCAATTAT	-
snPVvsEXC4.fwd	NFYA_MOUSE.H11MO.0.A	1	0.0188894	6.76241	0.42592	13	ACTGTAATCAAGG	TCAGCCAATCAGAA	+
snPVvsEXC4.fwd	NKX25_MOUSE.H11MO.0.A	-3	0.0215864	7.72792	0.47152	10	ACTGTAATCAAGG	CCACTCCAGA	-
snPVvsEXC4.fwd	DLX5_MOUSE.H11MO.0.C	1	0.0225993	8.09056	0.478688	10	ACTGTAATCAAGG	ACCTATAATTA	-
snPVvsEXC4.fwd	CUX2_MOUSE.H11MO.0.C	-4	0.0239375	8.56963	0.49212	9	ACTGTAATCAAGG	AAATCAATGAA	+
snPVvsEXC4.fwd	NKX61_MOUSE.H11MO.0.A	7	0.0252987	9.05693	0.500002	12	ACTGTAATCAAGG	TAATTAAAATCCCATTAAT	-
snPVvsEXC4.fwd	FOXJ2_MOUSE.H11MO.0.C	0	0.0257515	9.21905	0.500002	10	ACTGTAATCAAGG	TAAATAAACA	-
snPVvsEXC5.fwd	NFE2_MOUSE.H11MO.0.A	0	4.40811e-09	1.5781e-06	3.04828e-06	13	AACTGCTGACTCA	AACTGCTGAGTCAT	-
snPVvsEXC5.fwd	MAFK_MOUSE.H11MO.0.A	2	8.92613e-09	3.19555e-06	3.04828e-06	13	AACTGCTGACTCA	AAAACTGCTGAGTCAGCATT	+
snPVvsEXC5.fwd	MAFG_MOUSE.H11MO.0.A	2	1.3161e-08	4.71162e-06	3.04828e-06	13	AACTGCTGACTCA	AAAATTGCTGACTCAGCA	+
snPVvsEXC5.fwd	MAF_MOUSE.H11MO.0.A	1	2.04206e-08	7.31059e-06	3.49083e-06	13	AACTGCTGACTCA	AATTTGCTGACTCAGCA	+
snPVvsEXC5.fwd	NF2L2_MOUSE.H11MO.0.A	0	2.51195e-08	8.99277e-06	3.49083e-06	13	AACTGCTGACTCA	AATTGCTGAGTCAT	-
snPVvsEXC5.fwd	MAFF_MOUSE.H11MO.0.A	1	1.34166e-06	0.000480314	0.000155374	13	AACTGCTGACTCA	TTTTTGCTGAGTCAGCATTTTT	-
snPVvsEXC5.fwd	MAFB_MOUSE.H11MO.0.B	-3	1.03256e-05	0.00369658	0.000896841	10	AACTGCTGACTCA	TGCTGACTCAG	+
snPVvsEXC5.fwd	BACH2_MOUSE.H11MO.0.A	-3	3.56263e-05	0.0127542	0.00275053	10	AACTGCTGACTCA	TGCTGAGTCAT	+
snPVvsEXC5.fwd	BACH1_MOUSE.H11MO.0.C	-3	0.000189484	0.0678353	0.0131662	10	AACTGCTGACTCA	TGCTGAGTCATGGT	+
snPVvsEXC5.fwd	RXRG_MOUSE.H11MO.0.B	8	0.00232652	0.832895	0.11547	13	AACTGCTGACTCA	TGACCTTGAACTCCTGACCCTC	-
snPVvsEXC5.fwd	RARA_MOUSE.H11MO.0.A	8	0.00287862	1.03055	0.133346	12	AACTGCTGACTCA	TGACCTTGAACTTCTGACCC	-
snPVvsEXC5.fwd	RXRA_MOUSE.H11MO.0.A	8	0.00385508	1.38012	0.167418	13	AACTGCTGACTCA	TGACCTTGAACTCCTGACCCT	-
snPVvsEXC5.fwd	FOSL2_MOUSE.H11MO.0.A	-4	0.00413098	1.47889	0.168847	9	AACTGCTGACTCA	GGTGACTCATC	-
snPVvsEXC5.fwd	JUN_MOUSE.H11MO.0.A	-4	0.00479973	1.71831	0.185282	9	AACTGCTGACTCA	GGTGAGTCAC	+
snPVvsEXC5.fwd	FOXQ1_MOUSE.H11MO.0.C	0	0.00737403	2.6399	0.269674	12	AACTGCTGACTCA	TATTGTTTATTT	+
snPVvsEXC5.fwd	FOXA1_MOUSE.H11MO.0.A	-3	0.0100075	3.58267	0.347682	10	AACTGCTGACTCA	TGTTTACATA	+
snPVvsEXC5.fwd	FOSL1_MOUSE.H11MO.0.A	-4	0.0118522	4.24309	0.392164	9	AACTGCTGACTCA	GGTGACTCATCC	-
snPVvsEXC5.fwd	ATF3_MOUSE.H11MO.0.A	-5	0.0138909	4.97296	0.402169	8	AACTGCTGACTCA	GTGACTCAT	-
snPVvsEXC5.fwd	FOS_MOUSE.H11MO.0.A	-4	0.0149313	5.34542	0.414999	9	AACTGCTGACTCA	GATGACTCATCC	-
snPVvsEXC5.fwd	PTF1A_MOUSE.H11MO.0.A	2	0.0162744	5.82623	0.431092	13	AACTGCTGACTCA	CCAGCTGCCCCCTTTCCC	+
snPVvsEXC5.fwd	FOXP2_MOUSE.H11MO.0.A	-2	0.0178973	6.40723	0.431092	9	AACTGCTGACTCA	TTGTTTACT	+
snPVvsEXC5.fwd	FOXO4_MOUSE.H11MO.0.C	-2	0.0190374	6.81539	0.431092	9	AACTGCTGACTCA	TTGTTTATT	+
snPVvsEXC5.fwd	ETV2_MOUSE.H11MO.0.A	3	0.0194855	6.97579	0.431092	13	AACTGCTGACTCA	CCCACTTCCTGTTTCC	-
snPVvsEXC5.fwd	HEN1_MOUSE.H11MO.0.C	5	0.0212209	7.59707	0.431092	13	AACTGCTGACTCA	TGGGGAGCAGCTGCGTCCCT	+
snPVvsEXC5.fwd	FOSB_MOUSE.H11MO.0.A	-5	0.0215034	7.69822	0.431092	8	AACTGCTGACTCA	ATGAGTCAT	+
snPVvsEXC5.fwd	JUNB_MOUSE.H11MO.0.A	-5	0.0215034	7.69822	0.431092	8	AACTGCTGACTCA	GTGACTCAT	-
snPVvsEXC5.fwd	BHA15_MOUSE.H11MO.0.A	2	0.0217145	7.77378	0.431092	9	AACTGCTGACTCA	CCAGCTGCTGC	-
snPVvsEXC5.fwd	ATOH1_MOUSE.H11MO.0.B	2	0.0228357	8.17519	0.440758	7	AACTGCTGACTCA	CCATCTGCT	-
snPVvsEXC5.fwd	JUND_MOUSE.H11MO.0.A	-3	0.0272483	9.75489	0.484666	10	AACTGCTGACTCA	GGGTGAGTCAT	+
snPVvsEXC6.fwd	TFE2_MOUSE.H11MO.0.A	-1	5.69247e-07	0.000203791	0.000399903	11	ACACAGCTGCAGT	CACAGCTGCAG	+
snPVvsEXC6.fwd	ASCL1_MOUSE.H11MO.0.A	2	9.0308e-05	0.0323303	0.0299257	12	ACACAGCTGCAGT	GGGGGCAGCTGCAG	-
snPVvsEXC6.fwd	SNAI2_MOUSE.H11MO.0.A	-1	0.000168668	0.0603832	0.0299257	11	ACACAGCTGCAGT	GGCAGGTGCAT	+
snPVvsEXC6.fwd	MYOG_MOUSE.H11MO.0.A	1	0.000170392	0.0610004	0.0299257	12	ACACAGCTGCAGT	GGGACAGCTGCGG	-
snPVvsEXC6.fwd	MYF6_MOUSE.H11MO.0.C	-3	0.000220481	0.0789322	0.0309781	7	ACACAGCTGCAGT	CAGCTGC	+
snPVvsEXC6.fwd	LYL1_MOUSE.H11MO.0.A	4	0.000279005	0.0998839	0.0326674	10	ACACAGCTGCAGT	CAGGAAACAGCTGG	-
snPVvsEXC6.fwd	MYOD1_MOUSE.H11MO.0.A	5	0.00122818	0.439688	0.0995634	10	ACACAGCTGCAGT	GACAGGAACAGCTGC	-
snPVvsEXC6.fwd	ASCL2_MOUSE.H11MO.0.C	-1	0.00127552	0.456637	0.0995634	9	ACACAGCTGCAGT	AGCAGCTGG	-
snPVvsEXC6.fwd	PTF1A_MOUSE.H11MO.0.A	8	0.00173255	0.620253	0.118437	10	ACACAGCTGCAGT	GGGAAAGGGGGCAGCTGG	-
snPVvsEXC6.fwd	OLIG2_MOUSE.H11MO.0.A	8	0.0018545	0.66391	0.118437	10	ACACAGCTGCAGT	CAGAAGGGAAACAGCTGG	-
snPVvsEXC6.fwd	BHA15_MOUSE.H11MO.0.A	1	0.00214988	0.769657	0.12586	10	ACACAGCTGCAGT	GCAGCAGCTGG	+
snPVvsEXC6.fwd	ATOH1_MOUSE.H11MO.0.B	-1	0.00253003	0.90575	0.126955	9	ACACAGCTGCAGT	AGCAGATGG	+
snPVvsEXC6.fwd	ITF2_MOUSE.H11MO.0.B	-2	0.00272259	0.974689	0.12751	9	ACACAGCTGCAGT	CCAGGTGCA	+
snPVvsEXC6.fwd	TGIF1_MOUSE.H11MO.0.A	0	0.00338695	1.21253	0.148711	9	ACACAGCTGCAGT	TGACAGCTG	+
snPVvsEXC6.fwd	HEN1_MOUSE.H11MO.0.C	4	0.00477991	1.71121	0.197526	13	ACACAGCTGCAGT	TGGGGAGCAGCTGCGTCCCT	+
snPVvsEXC6.fwd	OVOL1_MOUSE.H11MO.0.C	-2	0.00904219	3.2371	0.317613	9	ACACAGCTGCAGT	ACAGTTACA	-
snPVvsEXC6.fwd	NDF2_MOUSE.H11MO.0.A	-1	0.0117745	4.21526	0.393891	10	ACACAGCTGCAGT	AACAGATGGC	+
snPVvsEXC6.fwd	HTF4_MOUSE.H11MO.0.A	-1	0.0125269	4.48462	0.400013	10	ACACAGCTGCAGT	CCCACCTGCT	-
snPVvsEXC6.fwd	SNAI1_MOUSE.H11MO.0.C	-2	0.0154579	5.53392	0.472146	8	ACACAGCTGCAGT	CCACCTGG	-
snPVvsEXC6.fwd	NDF1_MOUSE.H11MO.0.A	-1	0.0169955	6.08438	0.497481	10	ACACAGCTGCAGT	GACAGATGGT	+
snPVvsEXC6.fwd	TWST1_MOUSE.H11MO.0.B	-2	0.0181315	6.49108	0.509505	11	ACACAGCTGCAGT	ACATCTGGTTTTAATTA	+
snPVvsEXC6.fwd	ZFP42_MOUSE.H11MO.0.A	1	0.0197037	7.05392	0.532388	11	ACACAGCTGCAGT	AAAATGGCTGCC	-
snPVvsEXC7.fwd	MAFK_MOUSE.H11MO.0.A	7	0.00171892	0.615372	0.654183	13	ACACTGCAGCTCC	AATGCTGACTCAGCAGTTTT	-
snPVvsEXC7.fwd	ASCL1_MOUSE.H11MO.0.A	-3	0.00298017	1.0669	0.654183	10	ACACTGCAGCTCC	CTGCAGCTGCCCCC	+
snPVvsEXC7.fwd	HEN1_MOUSE.H11MO.0.C	4	0.00375181	1.34315	0.654183	13	ACACTGCAGCTCC	AGGGACGCAGCTGCTCCCCA	-
snPVvsEXC7.fwd	TFE2_MOUSE.H11MO.0.A	-3	0.00458633	1.6419	0.654183	10	ACACTGCAGCTCC	CTGCAGCTGTG	-
snPVvsEXC7.fwd	NFE2_MOUSE.H11MO.0.A	3	0.00518584	1.85653	0.654183	11	ACACTGCAGCTCC	ATGACTCAGCAGTT	+
snPVvsEXC7.fwd	MAFG_MOUSE.H11MO.0.A	5	0.00550403	1.97044	0.654183	13	ACACTGCAGCTCC	TGCTGAGTCAGCAATTTT	-
snPVvsEXC7.fwd	ZKSC1_MOUSE.H11MO.0.A	3	0.00789599	2.82676	0.671185	13	ACACTGCAGCTCC	GGCACACAGTAGGTCCTCA	-
snPVvsEXC7.fwd	NF2L2_MOUSE.H11MO.0.A	3	0.00882319	3.1587	0.671185	11	ACACTGCAGCTCC	ATGACTCAGCAATT	+
snPVvsEXC7.fwd	MYOG_MOUSE.H11MO.0.A	-3	0.0089482	3.20345	0.671185	10	ACACTGCAGCTCC	CCGCAGCTGTCCC	+
snPVvsEXC7.fwd	PRDM9_MOUSE.H11MO.0.C	4	0.0094118	3.36942	0.671185	13	ACACTGCAGCTCC	AAGATGGCAGCAGCATCTG	+
snPVvsEXC7.fwd	SNAI2_MOUSE.H11MO.0.A	-3	0.01775	6.35451	0.995993	10	ACACTGCAGCTCC	ATGCACCTGCC	-
snPVvsEXC7.fwd	ATF4_MOUSE.H11MO.0.A	-2	0.0197986	7.0879	0.995993	11	ACACTGCAGCTCC	ATTGCATCATCC	-
snPVvsEXC7.fwd	MAF_MOUSE.H11MO.0.A	5	0.02233	7.99414	0.995993	12	ACACTGCAGCTCC	TGCTGAGTCAGCAAATT	-
snPVvsEXC7.fwd	MAFF_MOUSE.H11MO.0.A	9	0.023288	8.33709	0.995993	13	ACACTGCAGCTCC	TTTTTGCTGAGTCAGCATTTTT	-
snPVvsEXC7.fwd	CEBPB_MOUSE.H11MO.0.A	-2	0.0236065	8.45114	0.995993	11	ACACTGCAGCTCC	ATTGCACAACC	-
snPVvsEXC7.fwd	NRF1_MOUSE.H11MO.0.A	-1	0.0261637	9.36662	0.995993	12	ACACTGCAGCTCC	CACTGCGCATGCGCAGG	+
snPVvsEXC8.fwd	RORA_MOUSE.H11MO.0.C	0	1.87413e-06	0.000670937	0.00133543	13	ATCTGGGTCACAG	AACTAGGTCAGGG	+
snPVvsEXC8.fwd	NR1D1_MOUSE.H11MO.0.A	4	5.26611e-06	0.00188527	0.00187622	13	ATCTGGGTCACAG	AGGGAAGTGGGTCAGAAGG	+
snPVvsEXC8.fwd	NR1D2_MOUSE.H11MO.0.A	4	1.60318e-05	0.00573939	0.00380789	13	ATCTGGGTCACAG	GGGGAAGTGGGTCAGAGGG	+
snPVvsEXC8.fwd	PPARA_MOUSE.H11MO.0.A	0	6.22247e-05	0.0222764	0.0110848	13	ATCTGGGTCACAG	AACTAGGTCAAAGGTCA	+
snPVvsEXC8.fwd	PPARG_MOUSE.H11MO.0.A	0	8.05372e-05	0.0288323	0.0114776	13	ATCTGGGTCACAG	AAGTGGGGCAAAGGTCA	+
snPVvsEXC8.fwd	RORG_MOUSE.H11MO.0.B	2	0.000195164	0.0698686	0.0231777	10	ATCTGGGTCACAG	GAAAGTGGGTCA	+
snPVvsEXC8.fwd	ERR3_MOUSE.H11MO.0.C	-1	0.00456427	1.63401	0.464618	10	ATCTGGGTCACAG	TCAAGGTCAC	+
snPVvsEXC8.fwd	ATF3_MOUSE.H11MO.0.A	-2	0.00721952	2.58459	0.575563	9	ATCTGGGTCACAG	ATGAGTCAC	+
snPVvsEXC8.fwd	USF1_MOUSE.H11MO.0.A	-4	0.00726963	2.60253	0.575563	9	ATCTGGGTCACAG	GGGTCACGTGGCC	+
snPVvsEXC8.fwd	ZFP57_MOUSE.H11MO.0.B	-2	0.00876471	3.13777	0.624541	10	ATCTGGGTCACAG	CTGCGGCAAA	+
snPVvsEXC8.fwd	RXRB_MOUSE.H11MO.0.C	-2	0.0105874	3.7903	0.685837	10	ATCTGGGTCACAG	TGAGGTCACA	+
snPVvsEXC8.fwd	NR2C2_MOUSE.H11MO.0.A	-4	0.0123845	4.43363	0.724326	9	ATCTGGGTCACAG	AGGTCAAAGGTCA	+
snPVvsEXC8.fwd	JUNB_MOUSE.H11MO.0.A	-2	0.0132146	4.73083	0.724326	9	ATCTGGGTCACAG	ATGAGTCAC	+
snPVvsEXC8.fwd	RARG_MOUSE.H11MO.0.C	-4	0.0169988	6.08557	0.769984	9	ATCTGGGTCACAG	AGGTCAGAGTGACCTGGG	+
snPVvsEXC8.fwd	MITF_MOUSE.H11MO.0.A	-5	0.0183109	6.55532	0.769984	8	ATCTGGGTCACAG	AGTCACGTGG	-
snPVvsEXC8.fwd	USF2_MOUSE.H11MO.0.A	-4	0.0189332	6.77807	0.769984	9	ATCTGGGTCACAG	GGGTCACGTGGCCGCGGCG	+
snPVvsEXC8.fwd	BACH1_MOUSE.H11MO.0.C	0	0.0193744	6.93602	0.769984	13	ATCTGGGTCACAG	TGCTGAGTCATGGT	+
snPVvsEXC8.fwd	ESR2_MOUSE.H11MO.0.A	-4	0.0196764	7.04416	0.769984	9	ATCTGGGTCACAG	AGGTCAGGGTGACCT	-
snPVvsEXC8.fwd	BACH2_MOUSE.H11MO.0.A	0	0.0208735	7.47272	0.769984	11	ATCTGGGTCACAG	TGCTGAGTCAT	+
snPVvsEXC8.fwd	FOSB_MOUSE.H11MO.0.A	-2	0.0217844	7.79881	0.769984	9	ATCTGGGTCACAG	ATGAGTCAT	+
snPVvsEXC8.fwd	TFE3_MOUSE.H11MO.0.A	-5	0.0259686	9.29675	0.769984	8	ATCTGGGTCACAG	GGTCACGTGA	+
snPVvsEXC8.fwd	TFEB_MOUSE.H11MO.0.C	-5	0.0260412	9.32276	0.769984	8	ATCTGGGTCACAG	GGTCACGTG	+
snPVvsEXC8.fwd	PKNX1_MOUSE.H11MO.0.A	-3	0.0261287	9.35408	0.769984	10	ATCTGGGTCACAG	TGATTGACAGG	+
snPVvsEXC8.fwd	TWST1_MOUSE.H11MO.0.B	2	0.0261913	9.37648	0.769984	13	ATCTGGGTCACAG	ACATCTGGTTTTAATTA	+
snPVvsEXC9.fwd	DDIT3_MOUSE.H11MO.0.C	0	0.00157981	0.565571	0.999962	10	GTTTCATCAGGGA	ATTGCATCAT	-
snPVvsEXC9.fwd	STAT6_MOUSE.H11MO.0.A	-1	0.00476713	1.70663	0.999962	12	GTTTCATCAGGGA	TTTCCTGAGAACTG	+
snPVvsEXC9.fwd	ZIC2_MOUSE.H11MO.0.C	-1	0.00848063	3.03607	0.999962	12	GTTTCATCAGGGA	TCTCAGCAGGGGGCC	-
snPVvsEXC9.fwd	SRF_MOUSE.H11MO.0.A	3	0.0092855	3.32421	0.999962	13	GTTTCATCAGGGA	ATGGCCAAATAAGGAAA	-
snPVvsEXC9.fwd	BATF3_MOUSE.H11MO.0.A	2	0.0123988	4.43876	0.999962	13	GTTTCATCAGGGA	CAGTTTCATTATGACTC	+
snPVvsEXC9.fwd	ZIC3_MOUSE.H11MO.0.A	-1	0.0127154	4.5521	0.999962	12	GTTTCATCAGGGA	TCACAGCAGGGGGCC	-
snPVvsEXC9.fwd	COE1_MOUSE.H11MO.0.A	-2	0.0128225	4.59044	0.999962	11	GTTTCATCAGGGA	GTCCCCAGGGACT	-
snPVvsEXC9.fwd	HXB4_MOUSE.H11MO.0.A	-2	0.0174846	6.25949	0.999962	8	GTTTCATCAGGGA	GCCATTAA	-
snPVvsEXC9.fwd	LHX3_MOUSE.H11MO.0.C	-2	0.0201086	7.19888	0.999962	9	GTTTCATCAGGGA	TTAATTAGC	-
snPVvsEXC9.fwd	LHX6_MOUSE.H11MO.0.C	-2	0.0201086	7.19888	0.999962	9	GTTTCATCAGGGA	GTAATCAGC	-
snPVvsEXC9.fwd	TF7L1_MOUSE.H11MO.0.A	-3	0.0256473	9.18172	0.999962	10	GTTTCATCAGGGA	ACATCAAAGGC	-
snPVvsEXC10.fwd	TFEB_MOUSE.H11MO.0.C	-1	1.1236e-07	4.02248e-05	7.85948e-05	9	GAGTCACGTGCTT	GGTCACGTG	+
snPVvsEXC10.fwd	MITF_MOUSE.H11MO.0.A	-1	8.20154e-07	0.000293615	0.000286846	10	GAGTCACGTGCTT	AGTCACGTGG	-
snPVvsEXC10.fwd	TFE3_MOUSE.H11MO.0.A	-1	1.67485e-06	0.000599597	0.000390516	10	GAGTCACGTGCTT	GGTCACGTGA	+
snPVvsEXC10.fwd	BHE40_MOUSE.H11MO.0.A	-2	2.09002e-05	0.00748228	0.00365488	9	GAGTCACGTGCTT	GTCACGTGC	-
snPVvsEXC10.fwd	USF1_MOUSE.H11MO.0.A	0	7.26641e-05	0.0260138	0.0101656	13	GAGTCACGTGCTT	GGGTCACGTGGCC	+
snPVvsEXC10.fwd	ARNT_MOUSE.H11MO.0.B	-3	0.000178497	0.0639021	0.0208096	8	GAGTCACGTGCTT	TCACGTGC	+
snPVvsEXC10.fwd	USF2_MOUSE.H11MO.0.A	0	0.000255954	0.0916314	0.0236415	13	GAGTCACGTGCTT	GGGTCACGTGGCCGCGGCG	+
snPVvsEXC10.fwd	BMAL1_MOUSE.H11MO.0.A	-2	0.000270384	0.0967975	0.0236415	9	GAGTCACGTGCTT	GTCACGTGG	-
snPVvsEXC10.fwd	AHR_MOUSE.H11MO.0.B	-2	0.00203923	0.730044	0.118869	9	GAGTCACGTGCTT	GTTGCGTGC	+
snPVvsEXC10.fwd	MYCN_MOUSE.H11MO.0.A	-3	0.00326264	1.16802	0.152146	8	GAGTCACGTGCTT	CCACGTGG	-
snPVvsEXC10.fwd	EPAS1_MOUSE.H11MO.0.C	-2	0.00368279	1.31844	0.161005	9	GAGTCACGTGCTT	GGCACGTAC	-
snPVvsEXC10.fwd	ASCL1_MOUSE.H11MO.0.A	1	0.00599897	2.14763	0.220854	13	GAGTCACGTGCTT	GGGGGCAGCTGCAG	-
snPVvsEXC10.fwd	MAX_MOUSE.H11MO.0.A	-2	0.00664614	2.37932	0.229378	11	GAGTCACGTGCTT	GCCACGTGCTC	-
snPVvsEXC10.fwd	ATF2_MOUSE.H11MO.0.A	-1	0.00909383	3.25559	0.289139	11	GAGTCACGTGCTT	GATGACGTCAT	+
snPVvsEXC10.fwd	SNAI2_MOUSE.H11MO.0.A	-2	0.0102799	3.68022	0.312641	11	GAGTCACGTGCTT	GGCAGGTGCAT	+
snPVvsEXC10.fwd	MXI1_MOUSE.H11MO.0.A	4	0.0117595	4.2099	0.342736	11	GAGTCACGTGCTT	CCCGCCGCCACGTGC	-
snPVvsEXC10.fwd	CLOCK_MOUSE.H11MO.0.C	0	0.0131176	4.69609	0.352909	13	GAGTCACGTGCTT	CAGACACGTGAACA	+
snPVvsEXC10.fwd	NKX31_MOUSE.H11MO.0.C	-2	0.0144113	5.15924	0.373355	11	GAGTCACGTGCTT	GTTAAGTGCTTT	+
snPVvsEXC10.fwd	RXRB_MOUSE.H11MO.0.C	2	0.0158104	5.66012	0.394973	8	GAGTCACGTGCTT	TGAGGTCACA	+
snPVvsEXC10.fwd	CREM_MOUSE.H11MO.0.C	0	0.0175473	6.28193	0.419527	11	GAGTCACGTGCTT	CACTGACGTCA	+
snPVvsEXC10.fwd	JUNB_MOUSE.H11MO.0.A	2	0.0185136	6.62787	0.419527	7	GAGTCACGTGCTT	ATGAGTCAC	+
snPVvsEXC10.fwd	MYC_MOUSE.H11MO.0.A	-1	0.0202958	7.26591	0.44365	12	GAGTCACGTGCTT	GCGCACGTGGCG	-
snPVvsEXC10.fwd	ATF3_MOUSE.H11MO.0.A	2	0.0235963	8.44747	0.496558	7	GAGTCACGTGCTT	ATGAGTCAC	+
snPVvsEXC10.fwd	VDR_MOUSE.H11MO.0.A	1	0.024136	8.6407	0.496558	13	GAGTCACGTGCTT	GGGGTCAGTGGGTTCA	+
snPVvsEXC10.fwd	ATF1_MOUSE.H11MO.0.B	-2	0.0253229	9.06558	0.503075	10	GAGTCACGTGCTT	GTGACGTCAC	-
snPVvsEXC10.fwd	ELF2_MOUSE.H11MO.0.C	-1	0.0258912	9.26904	0.503075	12	GAGTCACGTGCTT	AGTCACTTCCTGCTA	-
snPVvsEXC11.fwd	MYOG_MOUSE.H11MO.0.A	0	0.000432653	0.15489	0.261973	13	GACACATCTGAGG	GGGACAGCTGCGG	-
snPVvsEXC11.fwd	LYL1_MOUSE.H11MO.0.A	3	0.000741287	0.265381	0.261973	11	GACACATCTGAGG	CAGGAAACAGCTGG	-
snPVvsEXC11.fwd	THA_MOUSE.H11MO.0.C	1	0.00247012	0.884302	0.562777	13	GACACATCTGAGG	GAGGTCATCTGAGGACA	+
snPVvsEXC11.fwd	TFE2_MOUSE.H11MO.0.A	-2	0.00346439	1.24025	0.562777	11	GACACATCTGAGG	CACAGCTGCAG	+
snPVvsEXC11.fwd	ASCL1_MOUSE.H11MO.0.A	1	0.00491317	1.75892	0.562777	13	GACACATCTGAGG	GGGGGCAGCTGCAG	-
snPVvsEXC11.fwd	OLIG2_MOUSE.H11MO.0.A	7	0.00505387	1.80928	0.562777	11	GACACATCTGAGG	CAGAAGGGAAACAGCTGG	-
snPVvsEXC11.fwd	MYOD1_MOUSE.H11MO.0.A	4	0.00602877	2.1583	0.562777	11	GACACATCTGAGG	GACAGGAACAGCTGC	-
snPVvsEXC11.fwd	TAL1_MOUSE.H11MO.0.A	8	0.00712522	2.55083	0.562777	12	GACACATCTGAGG	CTGGGGGAGACAGATAAGAA	+
snPVvsEXC11.fwd	TF7L2_MOUSE.H11MO.0.A	-1	0.00716603	2.56544	0.562777	12	GACACATCTGAGG	CCACATCAAAGGG	-
snPVvsEXC11.fwd	GATA2_MOUSE.H11MO.0.A	-1	0.00970346	3.47384	0.685847	11	GACACATCTGAGG	ACAGATAAGAA	+
snPVvsEXC11.fwd	PTF1A_MOUSE.H11MO.0.A	7	0.0118948	4.25834	0.723781	11	GACACATCTGAGG	GGGAAAGGGGGCAGCTGG	-
snPVvsEXC11.fwd	BATF_MOUSE.H11MO.0.A	2	0.0126171	4.51692	0.723781	13	GACACATCTGAGG	CTGAGTCATTTCGAAACT	-
snPVvsEXC11.fwd	TGIF1_MOUSE.H11MO.0.A	-1	0.0134284	4.80736	0.723781	9	GACACATCTGAGG	TGACAGCTG	+
snPVvsEXC11.fwd	TWST1_MOUSE.H11MO.0.B	-3	0.0149296	5.34481	0.723781	10	GACACATCTGAGG	ACATCTGGTTTTAATTA	+
snPVvsEXC11.fwd	HSF1_MOUSE.H11MO.0.A	2	0.0156441	5.60059	0.723781	13	GACACATCTGAGG	TAGAAAGTTCTAGAA	+
snPVvsEXC11.fwd	ZIC3_MOUSE.H11MO.0.A	-1	0.0165544	5.92646	0.723781	12	GACACATCTGAGG	TCACAGCAGGGGGCC	-
snPVvsEXC11.fwd	FOXI1_MOUSE.H11MO.0.B	0	0.0174083	6.23216	0.723781	12	GACACATCTGAGG	AACCAATCAGAG	-
snPVvsEXC11.fwd	SOX3_MOUSE.H11MO.0.C	0	0.0197719	7.07834	0.729946	11	GACACATCTGAGG	GGAACAAAGGC	-
snPVvsEXC11.fwd	MYF6_MOUSE.H11MO.0.C	-3	0.0211464	7.57041	0.729946	7	GACACATCTGAGG	GCAGCTG	-
snPVvsEXC11.fwd	HEN1_MOUSE.H11MO.0.C	3	0.0244952	8.76929	0.729946	13	GACACATCTGAGG	TGGGGAGCAGCTGCGTCCCT	+
snPVvsEXC11.fwd	GATA1_MOUSE.H11MO.0.A	7	0.0248443	8.89427	0.729946	12	GACACATCTGAGG	TGGGGGGGGCAGATAAGGG	+
snPVvsEXC11.fwd	SNAI1_MOUSE.H11MO.0.C	-3	0.0252871	9.05277	0.729946	8	GACACATCTGAGG	CCACCTGG	-
snPVvsEXC11.fwd	GATA4_MOUSE.H11MO.0.A	-1	0.0254575	9.1138	0.729946	10	GACACATCTGAGG	ACAGATAAGA	+
snPVvsEXC11.fwd	NFAC1_MOUSE.H11MO.0.A	1	0.0257033	9.20179	0.729946	13	GACACATCTGAGG	TGGAAAATATGAGTC	+
snPVvsEXC11.fwd	BHA15_MOUSE.H11MO.0.A	0	0.0263302	9.42622	0.729946	11	GACACATCTGAGG	GCAGCAGCTGG	+
snPVvsEXC11.fwd	TCF7_MOUSE.H11MO.0.A	-1	0.0268607	9.61611	0.729946	12	GACACATCTGAGG	AAAGATCAAAGGAAAC	+
MoPVvsVIP1.fwd	ELF3_MOUSE.H11MO.0.B	0	3.60496e-06	0.00129058	0.00253819	13	AAGGAAGGAAGTA	GAACCAGGAAGTGG	+
MoPVvsVIP1.fwd	ELF5_MOUSE.H11MO.0.A	1	4.79209e-05	0.0171557	0.0168701	13	AAGGAAGGAAGTA	GGAAGAAGGAAGAAGAA	+
MoPVvsVIP1.fwd	EHF_MOUSE.H11MO.0.B	0	0.000103411	0.0370212	0.0242699	13	AAGGAAGGAAGTA	GAACCAGGAAGTGGC	+
MoPVvsVIP1.fwd	ETV2_MOUSE.H11MO.0.A	1	0.00019721	0.0706012	0.034713	13	AAGGAAGGAAGTA	GGAAACAGGAAGTGGG	+
MoPVvsVIP1.fwd	OLIG2_MOUSE.H11MO.0.A	0	0.00129791	0.464652	0.178505	13	AAGGAAGGAAGTA	CAGAAGGGAAACAGCTGG	-
MoPVvsVIP1.fwd	ETV4_MOUSE.H11MO.0.B	-4	0.00169643	0.60732	0.178505	8	AAGGAAGGAAGTA	CAGGAAGT	+
MoPVvsVIP1.fwd	CUX2_MOUSE.H11MO.0.C	1	0.00195898	0.701313	0.178505	10	AAGGAAGGAAGTA	AAATCAATGAA	+
MoPVvsVIP1.fwd	ETS2_MOUSE.H11MO.0.A	2	0.00202823	0.726106	0.178505	11	AAGGAAGGAAGTA	GGAAGGAAGAGGA	+
MoPVvsVIP1.fwd	IRF4_MOUSE.H11MO.0.A	0	0.00372766	1.3345	0.278473	13	AAGGAAGGAAGTA	AAAAGAGGAACTGAAACT	+
MoPVvsVIP1.fwd	ELF2_MOUSE.H11MO.0.C	-1	0.00403211	1.4435	0.278473	12	AAGGAAGGAAGTA	TAGCAGGAAGTGAGT	+
MoPVvsVIP1.fwd	IRF8_MOUSE.H11MO.0.A	0	0.00435063	1.55753	0.278473	13	AAGGAAGGAAGTA	AAAAGAGGAAGTGAAAGTAA	+
MoPVvsVIP1.fwd	SPI1_MOUSE.H11MO.0.A	1	0.00491496	1.75956	0.288378	13	AAGGAAGGAAGTA	AAAAAGAGGAAGTGA	+
MoPVvsVIP1.fwd	SPIB_MOUSE.H11MO.0.A	0	0.00555555	1.98889	0.300889	13	AAGGAAGGAAGTA	AAAAGAGGAAGTGAAAC	+
MoPVvsVIP1.fwd	ETS1_MOUSE.H11MO.0.A	0	0.00632988	2.2661	0.31834	13	AAGGAAGGAAGTA	GGGACAGGAAGTGG	+
MoPVvsVIP1.fwd	PTF1A_MOUSE.H11MO.0.A	0	0.00718031	2.57055	0.337035	13	AAGGAAGGAAGTA	GGGAAAGGGGGCAGCTGG	-
MoPVvsVIP1.fwd	FEV_MOUSE.H11MO.0.B	-3	0.00920054	3.29379	0.404871	10	AAGGAAGGAAGTA	GCGGGAAGCG	+
MoPVvsVIP1.fwd	ELF1_MOUSE.H11MO.0.A	0	0.0104715	3.74881	0.416609	13	AAGGAAGGAAGTA	GAACCCGGAAGTGG	+
MoPVvsVIP1.fwd	PRDM9_MOUSE.H11MO.0.C	-1	0.0109838	3.93221	0.416609	12	AAGGAAGGAAGTA	AAGATGGCAGCAGCATCTG	+
MoPVvsVIP1.fwd	IRF3_MOUSE.H11MO.0.A	3	0.0114116	4.08537	0.416609	13	AAGGAAGGAAGTA	GAAAGGGAAAGGGAAAGTGA	+
MoPVvsVIP1.fwd	ERG_MOUSE.H11MO.0.A	-1	0.0118341	4.23662	0.416609	12	AAGGAAGGAAGTA	GGACCGGAAGTGGG	+
MoPVvsVIP1.fwd	LYL1_MOUSE.H11MO.0.A	-4	0.012574	4.50149	0.421577	9	AAGGAAGGAAGTA	CAGGAAACAGCTGG	-
MoPVvsVIP1.fwd	HNF6_MOUSE.H11MO.0.A	1	0.0156163	5.59063	0.499779	10	AAGGAAGGAAGTA	AAATCAATAAA	-
MoPVvsVIP1.fwd	EVX2_MOUSE.H11MO.0.A	1	0.0179919	6.44111	0.53598	11	AAGGAAGGAAGTA	AAAGCAATAAAA	-
MoPVvsVIP1.fwd	STAT1_MOUSE.H11MO.0.A	11	0.0183455	6.5677	0.53598	11	AAGGAAGGAAGTA	AGGAAAATGAAACTGAAAGAAA	+
MoPVvsVIP1.fwd	NR1I3_MOUSE.H11MO.0.C	2	0.0190455	6.81829	0.53598	13	AAGGAAGGAAGTA	GGGGTCAGGAAAGTTCAG	+
MoPVvsVIP1.fwd	ANDR_MOUSE.H11MO.0.A	-1	0.0197924	7.08568	0.53598	12	AAGGAAGGAAGTA	AGGAACAGAGTGTTCC	-
MoPVvsVIP1.fwd	BARX1_MOUSE.H11MO.0.C	1	0.0214991	7.69668	0.560485	11	AAGGAAGGAAGTA	AAAACAATTAAA	-
MoPVvsVIP1.fwd	NR1D2_MOUSE.H11MO.0.A	-4	0.0237554	8.50443	0.560485	9	AAGGAAGGAAGTA	GGGGAAGTGGGTCAGAGGG	+
MoPVvsVIP1.fwd	SOX4_MOUSE.H11MO.0.A	2	0.0241654	8.65122	0.560485	10	AAGGAAGGAAGTA	GAGAACAAAGGA	-
MoPVvsVIP1.fwd	ETV6_MOUSE.H11MO.0.C	-3	0.0243597	8.72078	0.560485	9	AAGGAAGGAAGTA	ACAGGAAGT	+
MoPVvsVIP1.fwd	SP4_MOUSE.H11MO.0.B	-1	0.0246776	8.83457	0.560485	12	AAGGAAGGAAGTA	GGGAAGGGGGCGGGGCCGGG	+
MoPVvsVIP1.fwd	ELK4_MOUSE.H11MO.0.B	-1	0.0259964	9.30672	0.569125	12	AAGGAAGGAAGTA	GGACCGGAAGCGG	+
MoPVvsVIP1.fwd	SRF_MOUSE.H11MO.0.A	6	0.0267623	9.58091	0.569125	11	AAGGAAGGAAGTA	ATGGCCAAATAAGGAAA	-
MoPVvsVIP2.fwd	NKX28_MOUSE.H11MO.0.C	-1	0.00207604	0.743221	1	9	TCTCCTTGAGGAA	GTCCTTGAA	-
MoPVvsVIP2.fwd	ERR3_MOUSE.H11MO.0.C	1	0.00474928	1.70024	1	9	TCTCCTTGAGGAA	GTGACCTTGA	-
MoPVvsVIP2.fwd	PIT1_MOUSE.H11MO.0.C	-2	0.0100504	3.59803	1	11	TCTCCTTGAGGAA	CTCATGAATATAT	+
MoPVvsVIP2.fwd	STA5A_MOUSE.H11MO.0.A	0	0.0129205	4.62554	1	10	TCTCCTTGAGGAA	TTTCTTGGAA	-
MoPVvsVIP2.fwd	STA5B_MOUSE.H11MO.0.A	-1	0.0156641	5.60776	1	12	TCTCCTTGAGGAA	TTTCTTAGAAAT	+
MoPVvsVIP2.fwd	STAT4_MOUSE.H11MO.0.A	0	0.0187513	6.71298	1	10	TCTCCTTGAGGAA	TTTCCCGGAA	+
MoPVvsVIP2.fwd	STAT6_MOUSE.H11MO.0.A	-1	0.0202154	7.23711	1	12	TCTCCTTGAGGAA	TTTCCTGAGAACTG	+
MoPVvsVIP2.fwd	HSF2_MOUSE.H11MO.0.A	4	0.0265263	9.49643	1	10	TCTCCTTGAGGAA	AGAATGTTCTAGAA	+
MoPVvsVIP2.fwd	PRD16_MOUSE.H11MO.0.B	0	0.0267696	9.58352	1	10	TCTCCTTGAGGAA	TCCCCTGGGG	-
MoPVvsVIP3.fwd	NR2E3_MOUSE.H11MO.0.C	4	9.96049e-05	0.0356586	0.0704743	10	TCAGAAGTCACAT	AAAGTCAAAAGTCA	+
MoPVvsVIP3.fwd	NR2C2_MOUSE.H11MO.0.A	3	0.000471021	0.168626	0.142943	10	TCAGAAGTCACAT	AGGTCAAAGGTCA	+
MoPVvsVIP3.fwd	COT1_MOUSE.H11MO.0.B	-1	0.000606086	0.216979	0.142943	9	TCAGAAGTCACAT	CAAAGGTCA	+
MoPVvsVIP3.fwd	NR4A2_MOUSE.H11MO.0.C	-2	0.00131793	0.471819	0.231104	9	TCAGAAGTCACAT	AAAGGTCAC	+
MoPVvsVIP3.fwd	NR2C1_MOUSE.H11MO.0.C	2	0.00191341	0.685	0.231104	11	TCAGAAGTCACAT	GGCCAGAGGTCAG	+
MoPVvsVIP3.fwd	NR1H3_MOUSE.H11MO.0.A	4	0.00195979	0.701604	0.231104	11	TCAGAAGTCACAT	GAGGTCAAAGGTCAG	+
MoPVvsVIP3.fwd	CREB1_MOUSE.H11MO.0.A	-2	0.00256326	0.917648	0.246001	11	TCAGAAGTCACAT	TGACGTCATCG	-
MoPVvsVIP3.fwd	HXA10_MOUSE.H11MO.0.C	0	0.00278149	0.995773	0.246001	12	TCAGAAGTCACAT	TCATAAATCATC	-
MoPVvsVIP3.fwd	ATF1_MOUSE.H11MO.0.B	-1	0.00317065	1.13509	0.249261	10	TCAGAAGTCACAT	CTGACGTCAC	+
MoPVvsVIP3.fwd	RXRB_MOUSE.H11MO.0.C	-2	0.00390808	1.39909	0.251374	10	TCAGAAGTCACAT	TGAGGTCACA	+
MoPVvsVIP3.fwd	PPARA_MOUSE.H11MO.0.A	7	0.00437916	1.56774	0.258202	10	TCAGAAGTCACAT	AACTAGGTCAAAGGTCA	+
MoPVvsVIP3.fwd	TGIF1_MOUSE.H11MO.0.A	-1	0.00680452	2.43602	0.370343	9	TCAGAAGTCACAT	CAGCTGTCA	-
MoPVvsVIP3.fwd	THA_MOUSE.H11MO.0.C	7	0.00804358	2.8796	0.40651	10	TCAGAAGTCACAT	GAGGTCATCTGAGGACA	+
MoPVvsVIP3.fwd	COT2_MOUSE.H11MO.0.A	0	0.00862491	3.08772	0.40683	13	TCAGAAGTCACAT	CCAAAGGTCAGAG	+
MoPVvsVIP3.fwd	PPARG_MOUSE.H11MO.0.A	7	0.0114218	4.08902	0.494331	10	TCAGAAGTCACAT	AAGTGGGGCAAAGGTCA	+
MoPVvsVIP3.fwd	SIX2_MOUSE.H11MO.0.A	4	0.0118773	4.25207	0.494331	10	TCAGAAGTCACAT	GGTATCAGGTTTCA	-
MoPVvsVIP3.fwd	PEBB_MOUSE.H11MO.0.C	0	0.0143153	5.12488	0.562701	11	TCAGAAGTCACAT	TCTGTGGTTTG	+
MoPVvsVIP3.fwd	NR4A1_MOUSE.H11MO.0.B	-1	0.0153002	5.47747	0.569762	9	TCAGAAGTCACAT	AAAAGGTCA	+
MoPVvsVIP3.fwd	GFI1B_MOUSE.H11MO.0.A	-4	0.0171217	6.12958	0.605713	9	TCAGAAGTCACAT	AAATCACAGC	-
MoPVvsVIP3.fwd	MITF_MOUSE.H11MO.0.A	-5	0.0181811	6.50883	0.612562	8	TCAGAAGTCACAT	AGTCACGTGG	-
MoPVvsVIP3.fwd	GFI1_MOUSE.H11MO.0.C	-4	0.0217225	7.77664	0.698612	9	TCAGAAGTCACAT	AAATCACAGC	-
MoPVvsVIP3.fwd	RARA_MOUSE.H11MO.0.A	3	0.0266214	9.53045	0.785309	13	TCAGAAGTCACAT	GGGTCAGAAGTTCAAGGTCA	+
MoPVvsVIP4.fwd	STAT6_MOUSE.H11MO.0.A	-1	0.00196898	0.704894	0.970206	12	ACCTCCTGAGATC	TTTCCTGAGAACTG	+
MoPVvsVIP4.fwd	ZIC2_MOUSE.H11MO.0.C	4	0.00322638	1.15504	0.970206	11	ACCTCCTGAGATC	GGCCCCCTGCTGAGA	+
MoPVvsVIP4.fwd	RXRG_MOUSE.H11MO.0.B	8	0.00508191	1.81932	0.970206	13	ACCTCCTGAGATC	TGACCTTGAACTCCTGACCCTC	-
MoPVvsVIP4.fwd	ETV4_MOUSE.H11MO.0.B	0	0.00605324	2.16706	0.970206	8	ACCTCCTGAGATC	ACTTCCTG	-
MoPVvsVIP4.fwd	RXRA_MOUSE.H11MO.0.A	8	0.00677518	2.42552	0.970206	13	ACCTCCTGAGATC	TGACCTTGAACTCCTGACCCT	-
MoPVvsVIP4.fwd	ZIC3_MOUSE.H11MO.0.A	4	0.010262	3.6738	1	11	ACCTCCTGAGATC	GGCCCCCTGCTGTGA	+
MoPVvsVIP4.fwd	INSM1_MOUSE.H11MO.0.C	1	0.0131852	4.72031	1	11	ACCTCCTGAGATC	TGCCCCCTGACA	-
MoPVvsVIP4.fwd	NKX25_MOUSE.H11MO.0.A	-1	0.0155051	5.55083	1	10	ACCTCCTGAGATC	CCACTCCAGA	-
MoPVvsVIP4.fwd	ZN143_MOUSE.H11MO.0.A	1	0.0212693	7.61442	1	13	ACCTCCTGAGATC	GGCATGCTGGGAATTGTAGTCC	+
MoPVvsVIP4.fwd	THA11_MOUSE.H11MO.0.B	1	0.0224845	8.04946	1	13	ACCTCCTGAGATC	GGCATGCTGGGAGTTGTAGTTC	+
MoPVvsVIP5.fwd	ERR3_MOUSE.H11MO.0.C	-2	8.60763e-08	3.08153e-05	6.08157e-05	10	GTGTGACCTTGAA	GTGACCTTGA	-
MoPVvsVIP5.fwd	ERR2_MOUSE.H11MO.0.A	1	5.53194e-06	0.00198044	0.00195425	13	GTGTGACCTTGAA	AGGATGACCTTGAACTT	-
MoPVvsVIP5.fwd	NR5A2_MOUSE.H11MO.0.A	-3	1.07972e-05	0.0038654	0.00254286	10	GTGTGACCTTGAA	TGACCTTGAAC	-
MoPVvsVIP5.fwd	STF1_MOUSE.H11MO.0.B	-3	2.70474e-05	0.00968297	0.00457569	10	GTGTGACCTTGAA	TGGCCTTGAGC	-
MoPVvsVIP5.fwd	ERR1_MOUSE.H11MO.0.A	-3	3.23813e-05	0.0115925	0.00457569	10	GTGTGACCTTGAA	TGACCTTGACCT	-
MoPVvsVIP5.fwd	RARA_MOUSE.H11MO.0.A	-3	0.000247952	0.0887668	0.0291977	10	GTGTGACCTTGAA	TGACCTTGAACTTCTGACCC	-
MoPVvsVIP5.fwd	NR4A2_MOUSE.H11MO.0.C	-2	0.000413016	0.14786	0.0378017	9	GTGTGACCTTGAA	GTGACCTTT	-
MoPVvsVIP5.fwd	RXRG_MOUSE.H11MO.0.B	-3	0.000457433	0.163761	0.0378017	10	GTGTGACCTTGAA	TGACCTTGAACTCCTGACCCTC	-
MoPVvsVIP5.fwd	RXRA_MOUSE.H11MO.0.A	-3	0.000481528	0.172387	0.0378017	10	GTGTGACCTTGAA	TGACCTTGAACTCCTGACCCT	-
MoPVvsVIP5.fwd	NKX28_MOUSE.H11MO.0.C	-4	0.00106568	0.381512	0.0752935	9	GTGTGACCTTGAA	GTCCTTGAA	-
MoPVvsVIP5.fwd	COT1_MOUSE.H11MO.0.B	-3	0.00146088	0.522994	0.0938325	9	GTGTGACCTTGAA	TGACCTTTG	-
MoPVvsVIP5.fwd	RARG_MOUSE.H11MO.0.C	6	0.00165627	0.592946	0.0975175	12	GTGTGACCTTGAA	AGGTCAGAGTGACCTGGG	+
MoPVvsVIP5.fwd	RXRB_MOUSE.H11MO.0.C	-1	0.00230967	0.826862	0.125528	10	GTGTGACCTTGAA	TGTGACCTCA	-
MoPVvsVIP5.fwd	NR2C2_MOUSE.H11MO.0.A	-3	0.00595199	2.13081	0.300377	10	GTGTGACCTTGAA	TGACCTTTGACCT	-
MoPVvsVIP5.fwd	ESR1_MOUSE.H11MO.0.A	6	0.00882444	3.15915	0.415651	9	GTGTGACCTTGAA	AGGTCAGGGTGACCT	-
MoPVvsVIP5.fwd	BATF_MOUSE.H11MO.0.A	2	0.0102602	3.67315	0.453073	13	GTGTGACCTTGAA	CTGAGTCATTTCGAAACT	-
MoPVvsVIP5.fwd	THA_MOUSE.H11MO.0.C	-3	0.0130438	4.66968	0.54211	10	GTGTGACCTTGAA	TGTCCTCAGATGACCTC	-
MoPVvsVIP5.fwd	NR1H3_MOUSE.H11MO.0.A	-2	0.0172986	6.19291	0.679003	11	GTGTGACCTTGAA	CTGACCTTTGACCTC	-
MoPVvsVIP5.fwd	PRD14_MOUSE.H11MO.0.A	5	0.0207802	7.43932	0.772732	11	GTGTGACCTTGAA	AGGGTTAGAGACCTTG	+
MoPVvsVIP5.fwd	ESR2_MOUSE.H11MO.0.A	6	0.0238797	8.54893	0.815859	9	GTGTGACCTTGAA	AGGTCAGGGTGACCT	-
MoPVvsVIP5.fwd	PPARA_MOUSE.H11MO.0.A	-3	0.0242495	8.68131	0.815859	10	GTGTGACCTTGAA	TGACCTTTGACCTAGTT	-
MoPVvsVIP6.fwd	SP7_MOUSE.H11MO.0.A	1	0.000368692	0.131992	0.262716	13	ATTACTGTAAATA	CAAACCTGTAATTA	+
MoPVvsVIP6.fwd	DLX5_MOUSE.H11MO.0.C	-2	0.00126963	0.454529	0.297799	11	ATTACTGTAAATA	ACCTATAATTA	-
MoPVvsVIP6.fwd	ALX1_MOUSE.H11MO.0.B	-2	0.00160738	0.575442	0.297799	11	ATTACTGTAAATA	TAATTCAATTAT	-
MoPVvsVIP6.fwd	FOXL2_MOUSE.H11MO.0.C	-2	0.00169262	0.605957	0.297799	11	ATTACTGTAAATA	AAATGTAAACA	-
MoPVvsVIP6.fwd	PROP1_MOUSE.H11MO.0.C	-2	0.00208964	0.74809	0.297799	11	ATTACTGTAAATA	TAATTCAATTA	-
MoPVvsVIP6.fwd	FOXA1_MOUSE.H11MO.0.A	-3	0.00304348	1.08956	0.361445	10	ATTACTGTAAATA	TATGTAAACA	-
MoPVvsVIP6.fwd	DLX3_MOUSE.H11MO.0.C	-5	0.00488344	1.74827	0.497109	8	ATTACTGTAAATA	TGTAATTATC	-
MoPVvsVIP6.fwd	NKX61_MOUSE.H11MO.0.A	0	0.0074116	2.65335	0.650145	13	ATTACTGTAAATA	ATTAATGGGATTTTAATTA	+
MoPVvsVIP6.fwd	FOXP2_MOUSE.H11MO.0.A	-5	0.0086732	3.10501	0.650145	8	ATTACTGTAAATA	AGTAAACAA	-
MoPVvsVIP6.fwd	FOXA2_MOUSE.H11MO.0.A	-3	0.00946985	3.3902	0.650145	10	ATTACTGTAAATA	AAAGTAAACAAGG	-
MoPVvsVIP6.fwd	FOXA3_MOUSE.H11MO.0.A	-2	0.0100364	3.59305	0.650145	11	ATTACTGTAAATA	CAAAGTAAACAAG	-
MoPVvsVIP6.fwd	FOXO3_MOUSE.H11MO.0.B	-5	0.0112691	4.03434	0.657166	8	ATTACTGTAAATA	TGTAAACAGG	-
MoPVvsVIP6.fwd	GFI1_MOUSE.H11MO.0.C	-3	0.0119893	4.29219	0.657166	10	ATTACTGTAAATA	GCTGTGATTT	+
MoPVvsVIP6.fwd	FOXK1_MOUSE.H11MO.0.A	-4	0.0141273	5.05759	0.713134	9	ATTACTGTAAATA	ATGTAAACAAG	-
MoPVvsVIP6.fwd	FOXQ1_MOUSE.H11MO.0.C	-2	0.0162494	5.81729	0.713134	11	ATTACTGTAAATA	TATTGTTTATTT	+
MoPVvsVIP6.fwd	ETV6_MOUSE.H11MO.0.C	-3	0.017489	6.26107	0.713134	9	ATTACTGTAAATA	ACAGGAAGT	+
MoPVvsVIP6.fwd	MEF2D_MOUSE.H11MO.0.A	-2	0.0180144	6.44917	0.713134	11	ATTACTGTAAATA	AGCTAAAAATAGCA	-
MoPVvsVIP6.fwd	GFI1B_MOUSE.H11MO.0.A	-3	0.0205415	7.35387	0.719124	10	ATTACTGTAAATA	GCTGTGATTT	+
MoPVvsVIP6.fwd	TBP_MOUSE.H11MO.0.A	-4	0.0205415	7.35387	0.719124	9	ATTACTGTAAATA	CTATAAAAGG	+
MoPVvsVIP6.fwd	MEF2A_MOUSE.H11MO.0.A	-2	0.0211934	7.58723	0.719124	11	ATTACTGTAAATA	TGCTAAAAATAGAA	-
MoPVvsVIP6.fwd	PIT1_MOUSE.H11MO.0.C	-1	0.0231744	8.29644	0.750601	12	ATTACTGTAAATA	CTCATGAATATAT	+
MoPVvsVIP7.fwd	MAFB_MOUSE.H11MO.0.B	-2	0.00412153	1.47551	1	11	TTCTAAGACTCTA	CTGAGTCAGCA	-
MoPVvsVIP7.fwd	STAT1_MOUSE.H11MO.0.A	4	0.00632881	2.26571	1	13	TTCTAAGACTCTA	AGGAAAATGAAACTGAAAGAAA	+
MoPVvsVIP7.fwd	BACH2_MOUSE.H11MO.0.A	0	0.00666969	2.38775	1	11	TTCTAAGACTCTA	TGCTGAGTCAT	+
MoPVvsVIP7.fwd	IRF4_MOUSE.H11MO.0.A	8	0.0114186	4.08786	1	10	TTCTAAGACTCTA	AAAAGAGGAACTGAAACT	+
MoPVvsVIP7.fwd	EVX2_MOUSE.H11MO.0.A	0	0.0119615	4.28221	1	12	TTCTAAGACTCTA	TTTTATTGCTTT	+
MoPVvsVIP7.fwd	ATF3_MOUSE.H11MO.0.A	-2	0.0143421	5.13446	1	9	TTCTAAGACTCTA	ATGAGTCAC	+
MoPVvsVIP7.fwd	BATF_MOUSE.H11MO.0.A	8	0.0153665	5.50119	1	10	TTCTAAGACTCTA	CTGAGTCATTTCGAAACT	-
MoPVvsVIP7.fwd	HSF1_MOUSE.H11MO.0.A	0	0.0157984	5.65584	1	13	TTCTAAGACTCTA	TTCTAGAACTTTCTA	-
MoPVvsVIP7.fwd	PBX2_MOUSE.H11MO.0.C	2	0.0177357	6.3494	1	13	TTCTAAGACTCTA	CCATCAATCAATTTA	-
MoPVvsVIP7.fwd	STAT2_MOUSE.H11MO.0.A	4	0.019319	6.9162	1	13	TTCTAAGACTCTA	AGGAAAATGAAACTGAAAG	+
MoPVvsVIP7.fwd	STA5B_MOUSE.H11MO.0.A	1	0.0193296	6.92	1	11	TTCTAAGACTCTA	TTTCTTAGAAAT	+
MoPVvsVIP7.fwd	MAFK_MOUSE.H11MO.0.A	5	0.0226217	8.09859	1	13	TTCTAAGACTCTA	AAAACTGCTGAGTCAGCATT	+
MoPVvsVIP7.fwd	RORG_MOUSE.H11MO.0.B	2	0.0229984	8.23341	1	10	TTCTAAGACTCTA	GAAAGTGGGTCA	+
MoPVvsVIP7.fwd	NF2L2_MOUSE.H11MO.0.A	3	0.0243857	8.7301	1	11	TTCTAAGACTCTA	AATTGCTGAGTCAT	-
MoPVvsVIP7.fwd	NFE2_MOUSE.H11MO.0.A	3	0.0257776	9.22837	1	11	TTCTAAGACTCTA	AACTGCTGAGTCAT	-
MoPVvsVIP7.fwd	SIX2_MOUSE.H11MO.0.A	4	0.0257776	9.22837	1	10	TTCTAAGACTCTA	TGAAACCTGATACC	+
MoPVvsVIP7.fwd	CDX2_MOUSE.H11MO.0.A	0	0.0257788	9.22882	1	12	TTCTAAGACTCTA	TTTTATGGCCTT	+
MoPVvsVIP8.fwd	MEF2A_MOUSE.H11MO.0.A	1	9.83838e-09	3.52214e-06	6.23655e-06	13	TACAAAAATAGAA	TGCTAAAAATAGAA	-
MoPVvsVIP8.fwd	MEF2C_MOUSE.H11MO.0.A	1	1.74799e-08	6.25781e-06	6.23655e-06	13	TACAAAAATAGAA	AGCTAAAAATAGAAC	-
MoPVvsVIP8.fwd	MEF2D_MOUSE.H11MO.0.A	1	1.72528e-07	6.17652e-05	4.10369e-05	13	TACAAAAATAGAA	AGCTAAAAATAGCA	-
MoPVvsVIP8.fwd	CDX1_MOUSE.H11MO.0.C	-1	0.00263782	0.944341	0.470567	8	TACAAAAATAGAA	ACATAAAT	-
MoPVvsVIP8.fwd	FOXJ3_MOUSE.H11MO.0.A	-2	0.00387927	1.38878	0.537131	11	TACAAAAATAGAA	AAAAAATAAACAA	-
MoPVvsVIP8.fwd	SRF_MOUSE.H11MO.0.A	3	0.00451644	1.61688	0.537131	13	TACAAAAATAGAA	ATGGCCAAATAAGGAAA	-
MoPVvsVIP8.fwd	SPI1_MOUSE.H11MO.0.A	-3	0.00746529	2.67257	0.760999	10	TACAAAAATAGAA	AAAAAGAGGAAGTGA	+
MoPVvsVIP8.fwd	SOX5_MOUSE.H11MO.0.C	-2	0.0117931	4.22192	0.996603	8	TACAAAAATAGAA	TAACAATA	-
MoPVvsVIP8.fwd	FOXL2_MOUSE.H11MO.0.C	-3	0.0161892	5.79574	0.996603	10	TACAAAAATAGAA	AAATGTAAACA	-
MoPVvsVIP8.fwd	TWST1_MOUSE.H11MO.0.B	2	0.0219635	7.86292	0.996603	13	TACAAAAATAGAA	TAATTAAAACCAGATGT	-
MoPVvsVIP8.fwd	FOXO1_MOUSE.H11MO.0.A	-3	0.0227381	8.14023	0.996603	10	TACAAAAATAGAA	GTAAACAGGC	-
MoPVvsVIP8.fwd	NR4A1_MOUSE.H11MO.0.B	-4	0.0246454	8.82306	0.996603	9	TACAAAAATAGAA	AAAAGGTCA	+
MoPVvsVIP8.fwd	BARX1_MOUSE.H11MO.0.C	0	0.0257545	9.22011	0.996603	12	TACAAAAATAGAA	AAAACAATTAAA	-
MoPVvsVIP8.fwd	ARI5B_MOUSE.H11MO.0.C	0	0.0262772	9.40722	0.996603	13	TACAAAAATAGAA	CACAATACCAACA	-
MoPVvsVIP9.fwd	MEF2D_MOUSE.H11MO.0.A	2	0.00182056	0.651759	0.449977	12	AACTTCTTAGCTT	TGCTATTTTTAGCT	+
MoPVvsVIP9.fwd	VSX2_MOUSE.H11MO.0.C	-2	0.00235139	0.841798	0.449977	11	AACTTCTTAGCTT	TTAATTAGCTTC	+
MoPVvsVIP9.fwd	MEF2C_MOUSE.H11MO.0.A	3	0.00246535	0.882594	0.449977	12	AACTTCTTAGCTT	GTTCTATTTTTAGCT	+
MoPVvsVIP9.fwd	MEF2A_MOUSE.H11MO.0.A	2	0.00251886	0.901751	0.449977	12	AACTTCTTAGCTT	TTCTATTTTTAGCA	+
MoPVvsVIP9.fwd	EVI1_MOUSE.H11MO.0.B	3	0.00318228	1.13926	0.454794	13	AACTTCTTAGCTT	TATCTTATCTTATCTT	-
[truncated: 812 more rows]
