# Supplementary material for: Machine learning sequence prioritization for cell type-specific enhancer design
Source: bioRxiv preprint, doi:10.1101/2021.04.15.439984, version 1 (2021-04-15)
Supplement: Supplemental Table 14 [file 439984_file30.xlsx]

## Sheet: SC1tmpseq
SC1
Model	G	A	G	G	A	C	A	G	A	T	T	C	T	C	A	T	A	T	A	G	G	C	C	A	G	G	C	T	A	A	C	T	T	C	A	A	G	T	T	C	A	C	T	G	T	G	T	A	G
PV vs. PV- (pop)	-2.8812e-05	3.54032e-05	0.000307338	0.000404493	-0.000660123	-0.000376183	-0.000734973	-4.78961e-05	-0.000331255	-0.00165578	-0.00119598	-0.000594525	-0.000733507	-0.00167654	-0.00152283	-0.00026725	5.7632e-05	0.00046624	0.00267866	0.00240011	0.00240322	0.00198437	0.00329288	0.00335122	0.00176323	0.00102632	0.000384656	2.27153e-05	-0.000213721	-0.000595048	-0.00198874	-0.000584052	-0.000562836	-0.000657307	-0.000841986	8.18038e-06	0.000180993	-0.000933541	-5.02454e-05	0.000108878	-2.78316e-06	-4.55802e-07	-0.00141726	-0.00042578	-0.0013621	-0.000686239	-0.00152331	-0.000402769	-0.00041735
PV vs. PV- (pop, with rbf)	1.09699e-05	0.000128459	0.000328622	0.000341519	-0.000176131	-3.23552e-05	-0.000173611	-3.23031e-07	-0.000124764	-0.000872015	-0.000576408	-0.000210885	-0.000287023	-0.000710966	-0.000698057	-0.0001082	1.42964e-05	0.000206802	0.00131033	0.00116081	0.00120958	0.000903235	0.00173979	0.00186539	0.00131245	0.000807197	0.000337376	8.38794e-05	-4.282e-05	-0.000154261	-0.000734714	-0.000201092	-0.000113247	-0.000173242	-3.88451e-05	0.00031883	0.000474778	-0.000314667	4.52282e-05	0.000124602	-1.34155e-05	-1.00114e-05	-0.000887555	-0.00041297	-0.000973531	-0.000457509	-0.000897205	-0.000196365	-1.41963e-06
PV vs. PV- (sn)	0.000361561	0.00206355	0.00178787	0.000782592	1.6819e-05	0.000716205	7.31392e-05	-4.14129e-11	-0.000126917	-0.00103214	-0.000269799	-3.41778e-05	-0.000325262	-0.00069949	-0.000811268	-0.000156391	2.26979e-05	0.00277107	0.0036108	0.00417965	0.00198637	0.000431521	0.00221898	0.00354881	0.000136406	-6.82838e-06	-1.38925e-06	-0.000530292	-0.000693042	-0.00153384	-0.00361544	-0.00118537	-0.000634129	-0.000123818	-2.50951e-06	0.000765501	0.000630631	-0.000710168	0.000160183	0.000579573	0.000496298	0.000709479	-5.84328e-05	-7.8385e-06	-0.00074788	-0.000381003	-0.00213115	-0.000905473	-1.13364e-06
PV vs. KNN (sn)	0.000580827	0.00164262	0.00126896	0.00104668	3.86731e-06	0.000618109	0.000373378	4.52122e-05	-2.98185e-05	-0.000747277	-0.000204241	-1.65871e-05	-0.000415775	-0.000588948	-0.000723204	-8.28352e-05	3.12779e-06	0.0010031	0.00233959	0.00288162	0.00128833	0.000380803	0.00201848	0.00270061	0.000208737	-2.46311e-06	-1.52989e-09	-5.65714e-05	-0.000359588	-0.00144644	-0.00393205	-0.00158854	-0.00118643	-0.000122248	-0.000143564	0.0006089	0.000349715	-0.000364833	7.51727e-06	4.202e-05	0.000100105	0.00108714	-0.00112229	-0.000585871	-0.00212791	-0.00126037	-0.00255406	-0.00204086	-0.000227408
PV vs. EXC (pop)	0.000167301	0.000995596	0.00172998	0.000773263	-0.00113062	-2.63751e-05	-0.00114169	-0.00087666	-0.00104221	-0.00276944	-0.00187228	-0.000337432	-0.000584957	-0.000393995	-0.000619756	-0.00030452	1.29379e-07	0.000373417	0.00200314	0.00453802	0.0023377	0.000883028	0.00446985	0.00437514	0.00217077	0.00163291	0.000287786	1.33049e-05	6.97113e-05	-0.000390032	-0.00208839	-0.00245488	-0.000657628	0.000133238	0.000176194	0.0025771	0.00250503	2.62229e-05	0.00122925	0.00166306	0.00240955	0.00165638	-2.00805e-05	-4.91803e-05	-1.0428e-05	-2.61476e-06	-7.73595e-05	-0.00086919	-0.00100308
PV vs. EXC (pop, with rbf)	0.000125529	0.000931398	0.00165893	0.000847949	-0.000593134	-9.50124e-06	-0.000781934	-0.00057784	-0.00091294	-0.00243298	-0.00148235	-0.000421838	-0.000443072	-0.000460102	-0.000672788	-0.000379528	-1.29673e-06	0.000182886	0.00180452	0.00351232	0.00199943	0.00067664	0.00351664	0.00322865	0.00213567	0.00139464	0.000484766	0.000129843	0.000108411	-6.43385e-05	-0.00130616	-0.00150858	-0.000399344	1.55121e-05	2.1111e-05	0.00144407	0.00141394	2.12058e-07	0.000728596	0.00104468	0.00109013	0.000890656	-4.94569e-06	-2.18532e-05	-7.78596e-06	-8.76157e-06	-0.000102601	-0.000206797	-0.00038495
PV vs. EXC (sn)	0.00015321	0.00137235	0.0015866	0.000273685	-0.000652374	0.000275892	-0.000356671	-0.00023156	-0.000356241	-0.00196579	-0.00137085	-0.000322316	-0.000867448	-0.000528521	-0.0012406	-0.00100665	-0.000134451	0.000140589	0.00171474	0.00303973	0.00140352	0.000552578	0.00234981	0.00323378	0.00162834	0.000329347	0.000720022	-0.00011253	-0.000651554	-0.00246132	-0.00401921	-0.00239031	-0.00230112	-0.000271628	-0.000480755	0.000470865	0.000411804	-6.62601e-06	0.000185907	0.000663483	0.000721015	0.000830467	-0.000193549	-0.00048184	-0.000352697	-0.000510731	-0.0024028	-0.00204749	-0.000278752
PV vs. VIP (pop)	-0.000200688	0.000214003	5.40222e-10	1.94364e-06	-0.000332927	-6.02999e-05	0.000334099	0.000682423	5.21218e-08	-0.00023072	-0.000327182	0.00018214	2.33977e-05	-6.47862e-06	-0.000177787	6.39512e-05	0.000305398	0.00183151	0.00147046	0.000141165	-3.61349e-05	-0.000522529	-0.00144894	-0.000397411	-0.000514787	-0.000499489	-3.14499e-09	0.00168499	0.000741403	0.00270643	0.0049592	0.00422168	0.00424141	0.00228585	0.00318029	0.001716	0.00202094	-0.000727157	-6.18694e-05	-0.00174181	-0.000389072	-2.49935e-05	-0.00161521	-0.000461505	-0.000155096	-0.000547944	-3.72257e-05	-2.69342e-05	3.37269e-06
PV vs. VIP (pop, with rbf)	-3.46638e-05	0.000281946	1.03213e-07	-2.61245e-05	-0.000126603	-0.000184241	0.000109165	0.000265911	-6.219e-05	-0.00029527	-9.40648e-05	0.000191126	0.000191895	2.71276e-07	2.98799e-07	8.05446e-05	0.000204993	0.0009629	0.000784626	-9.91491e-07	-0.000328221	-0.00119891	-0.00164377	-0.000368377	-0.000593908	-0.000368721	-6.3957e-09	0.0014203	0.000546182	0.0019562	0.00299355	0.00281968	0.00308661	0.00161796	0.00264066	0.00179992	0.00176029	8.66374e-06	7.57856e-05	-0.000596473	-9.11484e-05	0.000226174	-0.00065399	-0.000129051	-3.45855e-05	-0.000438244	4.40511e-05	6.05846e-05	0.000108809
PV vs. VIP (sn)	-6.65946e-06	0.000674717	0.000264284	0.000188403	-0.000602774	-0.000135652	6.15625e-05	0.000217853	3.59804e-05	-0.000906984	-0.000167367	-2.74289e-07	-7.33494e-08	-5.53223e-06	-0.000355597	0.000275	0.000688889	0.00199792	0.00355566	0.00297873	0.000195772	-0.000540236	-0.000807091	0.000285185	-0.000223439	-0.00016042	4.65595e-05	0.00223075	0.00143357	0.00294136	0.00376191	0.00465631	0.00689885	0.00187911	0.00615676	0.00519499	0.00527332	0.000305486	0.00254971	0.000457407	0.00157901	0.00163544	-4.31958e-08	-0.000122222	-9.52558e-05	-0.00051375	-0.000526919	6.23353e-05	8.46947e-05
PV vs. SST (sn)	0.000250203	0.00133343	0.00260579	0.00299294	0.000207717	0.00266999	0.00175845	9.12654e-05	-0.00125159	-0.00108694	-0.00051823	-0.000719206	-0.000872214	-0.0011541	-0.000125741	-7.84725e-05	0.000209945	0.00141354	0.00398127	0.00612812	0.00345492	0.00125285	0.00505008	0.00439972	0.00406304	0.0015497	0.00190911	0.00130478	0.000739899	5.17387e-05	-0.000751739	-0.000443562	-0.000113933	0.000785334	0.000498695	0.0023309	0.00368568	0.000239812	0.00113095	0.00241482	0.00248633	0.00112753	-0.000328787	-0.000252284	-0.00106786	-0.000701244	-0.000962279	-0.00133558	-0.00185296
SC2
Model	A	T	T	G	G	T	T	T	G	C	C	T	T	A	C	A	C	G	C	T	T	T	G	T	T	G	A	A	C	T	G	C	A	T	T	T	G	C	C	A	T	G	A	C	T	C	C	A	T
PV vs. PV- (pop)	-7.46446e-05	-8.52786e-05	-0.000589051	-0.00068623	-0.000167534	-0.000254493	-0.000164648	-0.000199212	-0.000312606	-9.94923e-06	-3.69383e-05	-0.000306699	-0.000465918	-0.000221372	-0.000350827	-0.000571006	-0.000245334	-0.000105884	-0.00274756	-0.0014866	-0.00245969	-0.00400805	-0.00442931	-0.0037777	-0.000717984	0.000299828	0.000341801	0.00016935	0.000914087	0.0017661	0.000545508	0.000842999	0.000324881	-0.000236659	-0.000514497	-0.00013612	-0.000318617	0.000380811	4.13348e-05	7.03532e-06	0.000723891	0.00161534	0.000457601	8.00961e-05	-0.000217298	-0.000122558	-0.000890137	-0.00140232	-0.000297945
PV vs. PV- (pop, with rbf)	-4.98681e-05	-0.000102435	-0.00051498	-0.000409306	-0.000170261	-0.000260938	-0.000186474	-0.000183094	-0.000117162	-2.95323e-09	-1.42801e-05	-0.000177195	-0.000119562	-0.000109755	-0.000127177	-0.000334666	-4.47545e-05	-3.1195e-05	-0.0014295	-0.000959651	-0.00156563	-0.00245544	-0.00256702	-0.00238394	-0.000515436	7.39839e-06	0.000314793	0.000121345	0.000712011	0.0011864	0.000534088	0.000753846	0.000397078	2.11569e-06	-0.000202375	-5.40983e-05	-0.000201947	0.000158913	9.96018e-06	9.97865e-06	0.000544232	0.00115842	0.000471292	0.000202981	3.62909e-05	-2.42759e-05	-0.000606899	-0.000881058	-0.000272863
PV vs. PV- (sn)	-0.000119518	-8.61112e-06	0.000467665	5.26166e-05	4.85677e-05	9.28701e-06	-2.14312e-08	-1.21331e-05	0.000596199	-1.86319e-06	-1.88784e-06	-0.000729288	-0.000845491	-0.00121116	-0.000298871	-0.000751554	-0.000560328	-0.000207176	-0.00584745	-0.00191639	-0.00244482	-0.00407992	-0.00426678	-0.00615569	-0.00231866	8.5654e-05	-0.000327905	-0.000287383	0.00131866	0.0006113	0.00309708	0.00327575	0.00155647	0.000636191	0.00204994	4.46231e-05	0.00022508	0.00140595	0.000281231	0.000162489	0.00158208	0.000508721	0.00320233	0.00172269	0.000619636	0.000218692	-0.000796666	-0.000420241	-0.00108366
PV vs. KNN (sn)	0.000214501	0.000193349	0.000381074	0.000531616	0.000194548	0.000460018	9.78863e-05	3.80158e-05	0.000756975	-8.79222e-07	0.000188043	-0.000655161	-0.000897025	-0.00153195	-0.000821806	-0.00128977	-0.00060685	-0.000276308	-0.00548626	-0.00149987	-0.00275282	-0.00468836	-0.00348898	-0.00714498	-0.00220856	2.07373e-05	3.49582e-05	1.69765e-05	0.00228544	0.00105648	0.00231473	0.00276116	0.00105808	0.000453129	0.00155759	-6.22737e-05	0.00022394	0.000997379	0.00047617	1.35183e-05	0.00192453	0.00121904	0.00377647	0.00142527	0.00082247	0.000869403	-0.00136207	-0.000636731	-0.00132344
PV vs. EXC (pop)	2.86833e-06	0.000270578	2.29348e-05	-0.000629782	-0.00035291	-6.95731e-06	-0.000162876	-0.000442882	-0.000447058	-0.00021569	-5.50976e-05	-0.000885633	-0.00101381	-0.00105427	-0.00107542	-0.00061468	-0.000666055	-0.000290151	-0.00270165	-0.00110863	-0.00145501	-0.00167712	-0.00251889	-0.00347406	-0.000391298	0.00125644	0.00135726	9.43445e-06	0.0016489	0.00164719	0.000778744	0.000708187	9.2452e-06	-0.000191608	-0.000429306	-0.00264511	-0.000520518	-4.9125e-05	-0.000201425	-0.00339842	-0.000144289	-0.000193199	-1.38414e-05	-1.68181e-06	-0.00133728	-0.000893815	-0.000536561	-0.00211091	-0.00118274
PV vs. EXC (pop, with rbf)	9.12039e-05	0.000251754	8.38923e-05	-0.000285515	-4.65357e-05	8.99587e-05	-1.07545e-05	-0.000341045	-0.000185287	-0.000133226	-4.51749e-05	-0.000605016	-0.000757348	-0.000589681	-0.000638669	-0.000609322	-0.000415705	-0.000313763	-0.00205645	-0.00109353	-0.00137842	-0.00151053	-0.0018536	-0.00251027	-0.000195165	0.00102837	0.00134299	3.87356e-05	0.00145619	0.000911714	0.00071696	0.000331109	-4.44801e-07	-0.00031947	-0.000316599	-0.00229358	-0.000359228	-5.89513e-05	-0.000238558	-0.00279204	-0.000184357	-0.000430062	-1.75231e-05	-3.37514e-05	-0.00111297	-0.00048338	-0.000167398	-0.00149314	-0.00106887
PV vs. EXC (sn)	3.35787e-05	0.000354085	0.000234301	-1.19936e-06	-0.000174744	-3.12593e-06	-8.30174e-05	-0.000279832	-6.27122e-05	-4.76003e-05	-9.59214e-05	-0.00106472	-0.00141202	-0.00118717	-0.000175794	-0.00143252	-0.000581347	-0.000623604	-0.00249668	-0.000700696	-0.00108784	-0.00225182	-0.00164344	-0.00414303	-0.00081496	-1.20607e-05	6.90927e-05	-0.000155078	0.000948396	0.00021624	0.000993085	0.000382124	0.000793534	0.000154288	0.000163701	-0.000177285	0.00015516	0.00103935	0.000602926	-0.00176271	-0.000179597	-0.000120657	-2.94439e-05	-0.000104896	-0.000537281	-0.00115799	-0.00254376	-0.00119316	-0.00195129
PV vs. VIP (pop)	-0.000346397	-0.000171285	-0.000520399	-6.66228e-05	2.38282e-08	3.53687e-05	0.000278855	0.00149989	0.000838786	0.000807917	0.00304079	0.00146484	0.00186865	0.00107004	0.000240957	0.00108858	0.0011146	-0.000232163	-0.00297007	-0.0019218	-0.00516576	-0.00562654	-0.00826522	-0.0078005	-0.00447673	-0.00131654	-0.000277793	-0.000294069	-0.000284339	0.000217543	0.00125689	0.000258833	-0.000150555	-0.000460115	-0.00138623	-0.00116984	-0.00363528	-0.0022632	-0.00385072	-0.00392776	-0.000634496	-0.000527223	0.000438737	0.00131204	0.00123451	-1.93567e-05	-0.000132851	-0.00278037	-0.00319861
PV vs. VIP (pop, with rbf)	-0.000247773	-0.000156443	-0.000434512	-8.02828e-05	-5.74308e-05	-3.62831e-05	1.30643e-05	0.000831459	0.000307924	0.00062979	0.00188807	0.00119648	0.00134136	0.00065114	0.000218085	0.000550032	0.000470527	-0.000235083	-0.00182808	-0.00157994	-0.0030159	-0.00400574	-0.00458392	-0.00460911	-0.00248796	-0.000496143	-8.05559e-05	1.69371e-07	6.98932e-07	0.000288105	0.000599115	6.70051e-05	-0.000466679	-0.000557052	-0.00109953	-0.000788408	-0.00221271	-0.00132098	-0.00263088	-0.00279209	-0.000376762	-0.000102846	0.000441842	0.000988409	0.00105067	3.58968e-06	-4.00651e-06	-0.00153164	-0.00142398
PV vs. VIP (sn)	-0.000454534	-0.000149174	-7.23193e-05	-1.43953e-06	-5.88795e-07	0.000245654	0.00019494	0.000535929	0.000939129	0.000767244	0.00203005	0.000680612	0.00164341	0.000496289	7.96195e-05	0.000364475	0.00025513	-0.000790462	-0.00571342	-0.00241914	-0.00551768	-0.00727464	-0.00758649	-0.00772995	-0.00229406	-5.35742e-06	3.58055e-05	-0.000115819	0.000338361	0.000366286	-2.51983e-06	-1.34267e-05	-0.00148778	-0.00108957	-0.00151789	-0.00232124	-0.00431149	-0.00230334	-0.00367079	-0.00411841	0.000805563	0.000388724	0.00272332	0.00170515	0.00355252	0.000198488	-1.60648e-06	-0.00353339	-0.00140885
PV vs. SST (sn)	0.000118559	-5.77272e-05	0.000205566	6.14181e-05	0.000369225	-0.000105435	-0.000106411	-0.00250033	-0.000799651	-0.00142232	-0.000664051	-0.00164054	-0.00149443	-0.000800221	-2.26162e-05	-4.44611e-05	-0.000127843	-4.76474e-05	-0.00129874	-0.000414936	-0.000881283	-0.00280413	-0.00118152	-0.000942409	-0.00100604	-0.000128398	-0.00104919	-0.000463896	-7.32039e-06	-0.000850431	-0.0019921	-0.00168673	-0.00303475	-0.00249222	-0.00297046	-0.0052704	-0.000743986	-0.00355886	-0.000269475	-0.00101491	-0.000178304	0.000607527	0.00161414	0.000281053	-4.43211e-05	-3.07704e-06	-0.000895693	-0.00228727	-0.00209436
[truncated: 451 more columns]
